# Supplementary material for: GSK3 inhibition rescues growth and telomere dysfunction in dyskeratosis congenita iPSC-derived type II alveolar epithelial cells
Source: eLife journal article supplement (doi:10.7554/elife.64430), 2022-05-13
Supplement: fig1-figsupp1-data1 [file elife-64430-fig1-figsupp1-data1-v2.zip]

## Cell Line Characterization

Cell Line ID:

Passage #:

Specimen Type:

Indication for Study:

Lab #:

PI:

Contact Person:

Email:

Address:

Test Code:

Account #:

PO #:

Date Received:

Date Reported:

Time in Culture:

Additional copies sent to:

Banding Technique:

Metaphases Counted:

Band Resolution:

Analyzed:

Karyotyped:

**RESULTS:**

Non-clonal Aberrations:

**INTERPRETATION:**
