# Supplementary material for: GSK3 inhibition rescues growth and telomere dysfunction in dyskeratosis congenita iPSC-derived type II alveolar epithelial cells
Source: eLife journal article supplement (doi:10.7554/elife.64430), 2022-05-13
Supplement: supp [file Figure4G-SourceData-2021-05-04-109-QuantificationTRAP.xlsx]

## Sheet: Sheet1
Gel 1: 3EF6/2DA9	Area under curve	Average	Normalized
3EF6 2500 K	24893	10152.9	1
3EF6 500 K	4477.1
3EF6 100 K	1088.51
2DA9 2500 K	2394.41	1015.85	0.100055
2DA9 500 K	535.778
2DA9 100 K	117.364
3EF6 2500 CK	36244.9	16047.4	1.58058
3EF6 500 CK	10576.4
3EF6 100 CK	1320.87
2DA9 2500 CK	32173.7	15933.1	1.56932
2DA9 500 CK	13993.1
2DA9 100 CK	1632.48
