# Supplementary material for: GSK3 inhibition rescues growth and telomere dysfunction in dyskeratosis congenita iPSC-derived type II alveolar epithelial cells
Source: eLife. 2022 May 13;11:e64430. doi: 10.7554/eLife.64430 (PMC9200405; doi:10.7554/eLife.64430)
Supplement: Supplementary file 1. — These tables provide the unedited output of the GSEA analysis using the C2 curated gene sets, H hallmark gene sets, and C3 regulatory target gene sets when comparing D70 mutant to WT iAT2 cells. The table reports the name of the gene set (ID), the size of the gene set (setSize), the raw enrichment score (enrichmentScore), the normalized enrichment score, along with the p-value, the adjusted p-value (p.adjust) and false discovery rate q-value (q-values). The ‘core enrichment’ column displays the genes in the gene set. [file elife-64430-supp1.xlsx]

## Sheet: mut_vs_wt_d70_C2
ID	setSize	enrichmentScore	NES	pvalue	p.adjust	qvalues	rank	leading_edge	core_enrichment
REACTOME_TRANSLATION	295	0.854097	2.94176	1e-10	3.22966e-09	2.07114e-09	4679	tags=83%, list=11%, signal=75%	RPS27L/RPS5/RPS19/MARS2/TUFM/RPL4/APEH/RPS12/RPL12/MRPL41/RPSA/RPS28/EIF3M/RPL13A/RPL7A/RPL22L1/EEF1A1/RPL7/AIMP2/MRPL15/RPL3/MRPS25/RPL28/RPLP1/RPS18/IARS2/SEC11C/AURKAIP1/EEF2/EEF1G/RPS2/VARS1/RPS6/RPL18/RPS10/RPL23A/RPL18A/RPS23/RPS16/RPL26/RPL14/RPS4Y1/SARS1/RPL37A/RPL8/RPS24/YARS1/RPL23/RPS13/MRPL4/EIF3K/RPLP0/RPL13/MRPS12/RPL27A/RPL31/PPA1/EIF3I/MRPS23/MRPL12/RPS9/GFM1/RPL11/RPS14/RPS3A/RPL…
REACTOME_EUKARYOTIC_TRANSLATION_INITIATION	120	0.905883	2.85862	1e-10	3.22966e-09	2.07114e-09	3372	tags=92%, list=8%, signal=85%	RPS27L/RPS5/RPS19/RPL4/RPS12/RPL12/RPSA/RPS28/EIF3M/RPL13A/RPL7A/RPL22L1/RPL7/RPL3/RPL28/RPLP1/RPS18/RPS2/RPS6/RPL18/RPS10/RPL23A/RPL18A/RPS23/RPS16/RPL26/RPL14/RPS4Y1/RPL37A/RPL8/RPS24/RPL23/RPS13/EIF3K/RPLP0/RPL13/RPL27A/RPL31/EIF3I/RPS9/RPL11/RPS14/RPS3A/RPL27/RPS3/RPL29/RPL32/RPS27/RPS27A/RPS17/RPL19/RPL36A/EIF2B5/RPS8/PABPC1/RPL10A/EIF3H/EIF3C/RPL35/RPL5/RPL15/RPS7/EIF5B/RPS15A/RPL36/RPS26/R…
KEGG_RIBOSOME	88	0.925843	2.81171	1e-10	3.22966e-09	2.07114e-09	3064	tags=94%, list=7%, signal=88%	RPS27L/RPS5/RPS19/RPL4/RPS12/RPL12/RPSA/RPS28/RPL13A/RPL7A/RPL22L1/RPL7/RPL3/RPL28/RPLP1/RPS18/RPS2/RPS6/RPL18/RPS10/RPL23A/RPL18A/RPS23/RPS16/RPL26/RPL14/RPS4Y1/RPL37A/RPL8/RPS24/RPL23/RPS13/RPLP0/RPL13/RPL27A/RPL31/RPS9/RPL11/RPS3A/RPL27/RPS3/RPL29/RPL32/RPS27/RPS27A/RPS17/RPL19/RPL36A/RPS8/RPL10A/RPL35/RPL5/RPL15/RPS7/RPS15A/RPL36/RPS26/RPS25/RPL17/RPS20/RPS11/RPL24/FAU/RPLP2/RPS15/RPL37/RPL9/…
REACTOME_EUKARYOTIC_TRANSLATION_ELONGATION	94	0.923134	2.80825	1e-10	3.22966e-09	2.07114e-09	3064	tags=95%, list=7%, signal=88%	RPS27L/RPS5/RPS19/RPL4/RPS12/RPL12/RPSA/RPS28/RPL13A/RPL7A/RPL22L1/EEF1A1/RPL7/RPL3/RPL28/RPLP1/RPS18/EEF2/EEF1G/RPS2/RPS6/RPL18/RPS10/RPL23A/RPL18A/RPS23/RPS16/RPL26/RPL14/RPS4Y1/RPL37A/RPL8/RPS24/RPL23/RPS13/RPLP0/RPL13/RPL27A/RPL31/RPS9/RPL11/RPS14/RPS3A/RPL27/RPS3/RPL29/RPL32/RPS27/RPS27A/RPS17/RPL19/RPL36A/RPS8/RPL10A/RPL35/EEF1A2/RPL5/RPL15/RPS7/RPS15A/RPL36/RPS26/RPS25/RPL17/EEF1B2/RPS20/R…
REACTOME_SELENOAMINO_ACID_METABOLISM	118	0.885542	2.78549	1e-10	3.22966e-09	2.07114e-09	3340	tags=85%, list=8%, signal=78%	RPS27L/PAPSS2/TXNRD1/RPS5/RPS19/RPL4/RPS12/RPL12/RPSA/RPS28/RPL13A/RPL7A/RPL22L1/RPL7/AIMP2/RPL3/RPL28/RPLP1/RPS18/AHCY/RPS2/RPS6/RPL18/RPS10/RPL23A/RPL18A/GSR/RPS23/RPS16/RPL26/RPL14/RPS4Y1/SARS1/RPL37A/RPL8/RPS24/RPL23/RPS13/RPLP0/RPL13/RPL27A/RPL31/RPS9/RPL11/RPS14/RPS3A/RPL27/RPS3/RPL29/RPL32/RPS27/RPS27A/RPS17/RPL19/RPL36A/RPS8/KARS1/RPL10A/RPL35/RPL5/RPL15/RPS7/MARS1/EEF1E1/RPS15A/RPL36/RPS…
REACTOME_RRNA_PROCESSING	204	0.834102	2.77054	1e-10	3.22966e-09	2.07114e-09	4196	tags=71%, list=10%, signal=64%	RPS27L/RPS5/RPS19/RPL4/RPS12/RPL12/RPSA/HSD17B10/RPS28/RPL13A/RPL7A/RPL22L1/RPL7/RPL3/RPL28/RCL1/RPLP1/RPS18/RPS2/RPS6/RPL18/RPS10/RPL23A/RPL18A/RPS23/RPS16/RPL26/RPL14/RPS4Y1/RPL37A/RPL8/BOP1/RPS24/WDR46/RPL23/RPS13/RPLP0/RPL13/RPL27A/RPL31/EBNA1BP2/DDX49/DCAF13/MPHOSPH6/RPS9/WDR3/SNU13/RPL11/RPS14/RPS3A/RPL27/RPS3/RPL29/NOP14/RPL32/RPS27/RPS27A/RPS17/RPL19/MRM2/RPL36A/DDX21/RPS8/RPL10A/RPL35/EX…
KEGG_OXIDATIVE_PHOSPHORYLATION	128	0.872147	2.76978	1e-10	3.22966e-09	2.07114e-09	3156	tags=80%, list=7%, signal=74%	ATP12A/ATP6V1A/ATP5F1A/ATP6V0D1/ATP6V1E1/NDUFV1/UQCR11/ATP6V0B/COX5A/MT-CO2/COX5B/NDUFB5/CYC1/COX8A/ATP5F1B/ATP5F1D/ATP6V0A4/NDUFS1/NDUFA10/UQCR10/NDUFA4/MT-ND3/ATP6V1H/NDUFB9/ATP6V1F/MT-ATP6/NDUFS7/COX6A1/PPA1/UQCRQ/SDHB/COX7C/MT-ND4/UQCRFS1/ATP5PB/SDHA/ATP5PF/MT-ND2/COX6B1/MT-CYB/NDUFA8/ATP6V1D/ATP5PD/ATP5MC3/ATP6V0E1/ATP5MC1/LHPP/MT-ATP8/COX6C/COX4I1/NDUFB8/ATP6V1B2/MT-ND6/NDUFS5/NDUFS8/NDUFA2…
REACTOME_RESPONSE_OF_EIF2AK4_GCN2_TO_AMINO_ACID_DEFICIENCY	102	0.896921	2.76376	1e-10	3.22966e-09	2.07114e-09	3223	tags=87%, list=7%, signal=81%	RPS27L/RPS5/RPS19/RPL4/RPS12/RPL12/RPSA/RPS28/RPL13A/RPL7A/RPL22L1/RPL7/RPL3/RPL28/RPLP1/RPS18/RPS2/RPS6/RPL18/RPS10/RPL23A/RPL18A/RPS23/RPS16/RPL26/RPL14/RPS4Y1/RPL37A/RPL8/RPS24/RPL23/RPS13/RPLP0/RPL13/RPL27A/RPL31/RPS9/RPL11/RPS14/RPS3A/RPL27/RPS3/RPL29/RPL32/RPS27/RPS27A/RPS17/RPL19/RPL36A/RPS8/RPL10A/RPL35/RPL5/RPL15/RPS7/RPS15A/RPL36/RPS26/RPS25/RPL17/RPS20/RPS11/RPL24/FAU/RPLP2/RPS15/RPL37…
REACTOME_SRP_DEPENDENT_COTRANSLATIONAL_PROTEIN_TARGETING_TO_MEMBRANE	113	0.883526	2.76282	1e-10	3.22966e-09	2.07114e-09	3064	tags=80%, list=7%, signal=74%	RPS27L/RPS5/RPS19/RPL4/RPS12/RPL12/RPSA/RPS28/RPL13A/RPL7A/RPL22L1/RPL7/RPL3/RPL28/RPLP1/RPS18/SEC11C/RPS2/RPS6/RPL18/RPS10/RPL23A/RPL18A/RPS23/RPS16/RPL26/RPL14/RPS4Y1/RPL37A/RPL8/RPS24/RPL23/RPS13/RPLP0/RPL13/RPL27A/RPL31/RPS9/RPL11/RPS14/RPS3A/RPL27/RPS3/RPL29/RPL32/RPS27/RPS27A/RPS17/RPL19/RPL36A/RPS8/RPL10A/RPL35/RPL5/RPL15/RPS7/RPS15A/RPL36/RPS26/RPS25/RPL17/RPS20/RPS11/RPL24/FAU/RPLP2/RPS1…
REACTOME_RESPIRATORY_ELECTRON_TRANSPORT_ATP_SYNTHESIS_BY_CHEMIOSMOTIC_COUPLING_AND_HEAT_PRODUCTION_BY_UNCOUPLING_PROTEINS	124	0.868713	2.74465	1e-10	3.22966e-09	2.07114e-09	3960	tags=86%, list=9%, signal=79%	ATP5F1A/NDUFV1/UQCR11/ETFB/COX5A/NDUFAF2/MT-CO2/COX5B/TRAP1/NDUFB5/CYC1/COX8A/CYCS/ATP5F1B/ATP5F1D/NDUFS1/NDUFA10/UQCR10/NDUFA4/MT-ND3/NDUFB9/MT-ATP6/NDUFS7/COX6A1/UQCRQ/SDHB/ETFA/COX7C/MT-ND4/UQCRFS1/ATP5PB/SDHA/NDUFA13/ATP5PF/MT-ND2/COX6B1/MT-CYB/NDUFA8/ATP5PD/ATP5MC3/ATP5MC1/MT-ATP8/SCO1/COX6C/NDUFAF6/COX4I1/NDUFB8/MT-ND6/NDUFS5/SCO2/NDUFS8/NDUFA2/COX14/SDHD/NDUFA3/NDUFV2/UQCRB/NDUFA11/UQCRC2/…
REACTOME_NONSENSE_MEDIATED_DECAY_NMD	116	0.870389	2.72507	1e-10	3.22966e-09	2.07114e-09	3064	tags=75%, list=7%, signal=70%	RPS27L/RPS5/RPS19/RPL4/RPS12/RPL12/RPSA/RPS28/RPL13A/RPL7A/RPL22L1/RPL7/RPL3/RPL28/RPLP1/RPS18/RPS2/RPS6/RPL18/RPS10/RPL23A/RPL18A/RPS23/RPS16/RPL26/RPL14/RPS4Y1/RPL37A/RPL8/RPS24/RPL23/RPS13/RPLP0/RPL13/RPL27A/RPL31/RPS9/RPL11/RPS14/RPS3A/RPL27/RPS3/RPL29/RPL32/RPS27/RPS27A/RPS17/RPL19/RPL36A/RPS8/PABPC1/RPL10A/RPL35/RPL5/RPL15/RPS7/RPS15A/RPL36/RPS26/RPS25/RPL17/RPS20/RPS11/RPL24/FAU/RPLP2/RPS1…
REACTOME_RESPIRATORY_ELECTRON_TRANSPORT	100	0.886791	2.72319	1e-10	3.22966e-09	2.07114e-09	4120	tags=91%, list=9%, signal=83%	NDUFV1/UQCR11/ETFB/COX5A/NDUFAF2/MT-CO2/COX5B/TRAP1/NDUFB5/CYC1/COX8A/CYCS/NDUFS1/NDUFA10/UQCR10/NDUFA4/MT-ND3/NDUFB9/NDUFS7/COX6A1/UQCRQ/SDHB/ETFA/COX7C/MT-ND4/UQCRFS1/SDHA/NDUFA13/MT-ND2/COX6B1/MT-CYB/NDUFA8/SCO1/COX6C/NDUFAF6/COX4I1/NDUFB8/MT-ND6/NDUFS5/SCO2/NDUFS8/NDUFA2/COX14/SDHD/NDUFA3/NDUFV2/UQCRB/NDUFA11/UQCRC2/NDUFB10/MT-ND1/COQ10B/UQCRH/NDUFB3/LRPPRC/NDUFB7/NDUFS6/NDUFAF4/NDUFAB1/NDUFA…
WONG_MITOCHONDRIA_GENE_MODULE	217	0.814663	2.72095	1e-10	3.22966e-09	2.07114e-09	5040	tags=78%, list=12%, signal=69%	NQO1/MAOA/FDXR/ACADSB/TUFM/ACAT1/ALDH6A1/ATP6V1E1/HSD17B10/NDUFV1/UQCR11/SLC25A39/ECHS1/COX5A/COX5B/CPT1A/FH/SUCLG1/NDUFB5/NFS1/GSR/PCCB/PDHX/CYC1/COX8A/ATP5F1B/NDUFA10/UQCR10/NDUFA4/BOP1/VDAC2/CYB5A/NDUFB9/AIFM1/ATP6V1F/COX6A1/UQCRQ/SDHB/COX7C/MRPL12/GPX4/TOMM40/UQCRFS1/ATP5PB/ATP5PF/TIMM8B/COX6B1/MCCC2/NDUFA8/SLC25A1/ATP6V1D/ATP5PD/ATP5MC3/ATP1B3/ATP5MC1/SCO1/KARS1/COX6C/MRPL36/TIMM13/COX4I1/MR…
MOOTHA_HUMAN_MITODB_6_2002	426	0.764401	2.71427	1e-10	3.22966e-09	2.07114e-09	4918	tags=66%, list=11%, signal=59%	PDK4/TAT/ACAD8/ACSL5/ALDH4A1/MAOA/FDXR/GDF15/ACADSB/TUFM/ACAT1/SLC25A20/ACO2/ALDH2/IDH3A/SLC25A5/CPT2/CPS1/UQCR11/HSPD1/ETFB/MCCC1/ECHS1/MRPL15/RPL3/COX5A/COX5B/FECH/BAX/TRAP1/CPT1A/FH/SUCLG1/NDUFB5/NFS1/GSR/OAT/PCCB/PDHX/CYC1/COX8A/CYCS/HADHA/ATP5F1B/SLC25A4/ATP5F1D/NDUFS1/NDUFA10/NDUFA4/VDAC2/PC/SLC25A11/MRPL4/CYB5A/AIFM1/TST/HSPE1/MRPS12/NDUFS7/COX6A1/TXNRD2/SDHB/ETFA/COX7C/AKAP1/MTCH2/MRPL12/…
REACTOME_THE_CITRIC_ACID_TCA_CYCLE_AND_RESPIRATORY_ELECTRON_TRANSPORT	175	0.824191	2.70585	1e-10	3.22966e-09	2.07114e-09	3960	tags=78%, list=9%, signal=71%	PDK4/MPC1/ACO2/ATP5F1A/IDH3A/ME1/VDAC1/NDUFV1/UQCR11/ETFB/COX5A/NDUFAF2/MT-CO2/COX5B/TRAP1/FH/SUCLG1/NDUFB5/PDHX/CYC1/COX8A/CYCS/ATP5F1B/ATP5F1D/NDUFS1/NDUFA10/UQCR10/NDUFA4/MT-ND3/NDUFB9/MT-ATP6/NDUFS7/COX6A1/UQCRQ/SDHB/ETFA/COX7C/MT-ND4/UQCRFS1/MDH2/ATP5PB/SDHA/NDUFA13/ATP5PF/MT-ND2/COX6B1/MT-CYB/NDUFA8/ATP5PD/ATP5MC3/ATP5MC1/MT-ATP8/LDHB/SCO1/COX6C/NDUFAF6/COX4I1/NDUFB8/MT-ND6/NDUFS5/SCO2/NDUF…
KEGG_PARKINSONS_DISEASE	126	0.852398	2.70312	1e-10	3.22966e-09	2.07114e-09	3156	tags=73%, list=7%, signal=68%	PINK1/SLC25A6/ATP5F1A/SLC25A5/VDAC1/NDUFV1/UQCR11/COX5A/MT-CO2/COX5B/NDUFB5/CYC1/COX8A/CYCS/ATP5F1B/SLC25A4/ATP5F1D/NDUFS1/NDUFA10/UQCR10/NDUFA4/MT-ND3/VDAC2/NDUFB9/MT-ATP6/NDUFS7/COX6A1/UQCRQ/SDHB/COX7C/MT-ND4/UQCRFS1/ATP5PB/SDHA/ATP5PF/MT-ND2/COX6B1/MT-CYB/NDUFA8/ATP5PD/ATP5MC3/ATP5MC1/MT-ATP8/COX6C/COX4I1/NDUFB8/MT-ND6/NDUFS5/NDUFS8/NDUFA2/SDHD/NDUFA3/PARK7/NDUFV2/UQCRB/UQCRC2/NDUFB10/ATP5F1E/…
MOOTHA_MITOCHONDRIA	444	0.751247	2.67476	1e-10	3.22966e-09	2.07114e-09	4918	tags=63%, list=11%, signal=56%	PDK4/TAT/ACAD8/ALDH4A1/MAOA/FDXR/ACADSB/G6PD/TUFM/ACAT1/SLC25A20/ACO2/ALDH2/IDH3A/SLC25A5/CPS1/UQCR11/HSPD1/ETFB/C1QBP/ECHS1/MRPL15/COX5A/COX5B/FECH/BAX/CPT1A/FH/SUCLG1/NDUFB5/PRKCD/NFS1/OAT/PCCB/PDHX/CYC1/COX8A/CYCS/HADHA/ATP5F1B/SLC25A4/ATP5F1D/NDUFS1/NDUFA10/NDUFA4/VDAC2/PC/SLC25A11/MRPL4/CYB5A/AIFM1/TST/HSPE1/MRPS12/COX6A1/TXNRD2/PPA1/SDHB/ETFA/COX7C/MTCH2/MRPL12/GPX4/MPST/TXN2/ACADM/TOMM40/U…
REACTOME_MITOCHONDRIAL_TRANSLATION	96	0.874435	2.66	1e-10	3.22966e-09	2.07114e-09	4679	tags=91%, list=11%, signal=81%	TUFM/MRPL41/MRPL15/MRPS25/AURKAIP1/MRPL4/MRPS12/MRPS23/MRPL12/GFM1/GADD45GIP1/MRPL36/MRPL18/MRPL37/TSFM/GFM2/OXA1L/MRPS2/MRPS30/MRPL27/MRPS27/MRPL52/MRPS24/MRPL1/MRPL33/MRPL34/MRPS33/MT-RNR2/MRPS7/MRPL21/MRPL3/MRPS34/MRPS16/MRPS14/MRPS9/MRPL30/MRPL32/MRPL39/MRPS35/MRPS18B/MT-RNR1/MRPS5/MRPS22/MRPL10/MRPL58/MRPL46/CHCHD1/MRPL23/MRPL38/MRPL20/MRPL24/MRPL13/MRPL47/MRPL45/MRPS10/DAP3/MRPS36/MRPL55/MR…
REACTOME_REGULATION_OF_EXPRESSION_OF_SLITS_AND_ROBOS	171	0.811132	2.65319	1e-10	3.22966e-09	2.07114e-09	3554	tags=72%, list=8%, signal=66%	RPS27L/RPS5/RPS19/PSME2/RPL4/RPS12/RPL12/RPSA/RPS28/RPL13A/RPL7A/RPL22L1/RPL7/RPL3/RPL28/RPLP1/RPS18/PSMD8/RPS2/RPS6/RPL18/RPS10/RPL23A/RPL18A/RPS23/RPS16/RPL26/RPL14/RPS4Y1/RPL37A/RPL8/RPS24/RPL23/RPS13/RPLP0/RPL13/RPL27A/ELOB/RPL31/RPS9/RPL11/RPS14/RPS3A/RPL27/RPS3/RPL29/RPL32/RPS27/RPS27A/RPS17/RPL19/RPL36A/PSMA7/RPS8/PABPC1/RPL10A/RPL35/RPL5/RPL15/RPS7/RPS15A/PSME1/RPL36/RPS26/PSMD1/RPS25/RPL…
REACTOME_METABOLISM_OF_AMINO_ACIDS_AND_DERIVATIVES	373	0.756032	2.64543	1e-10	3.22966e-09	2.07114e-09	3973	tags=59%, list=9%, signal=54%	NQO1/TAT/IYD/RPS27L/FAH/PAPSS2/ACAD8/GLDC/ALDH4A1/TXNRD1/RPS5/RPS19/ACADSB/HAL/PSME2/RPL4/ACAT1/ALDH6A1/RPS12/RPL12/RPSA/HSD17B10/RPS28/CPS1/RPL13A/RPL7A/RPL22L1/MCCC1/RPL7/AIMP2/ECHS1/RPL3/RPL28/RPLP1/RPS18/AHCY/PSMD8/RPS2/RPS6/RPL18/RPS10/RPL23A/RPL18A/GSR/OAT/PDHX/RPS23/RPS16/RPL26/RPL14/RPS4Y1/SARS1/RPL37A/PSAT1/RPL8/RPS24/RPL23/RPS13/RPLP0/RPL13/TST/RPL27A/RPL31/MPST/TXN2/GCSH/RPS9/SDSL/SRM/…
MOOTHA_VOXPHOS	86	0.867566	2.61766	1e-10	3.22966e-09	2.07114e-09	4074	tags=86%, list=9%, signal=78%	UQCR11/COX5A/COX5B/NDUFB5/CYC1/COX8A/CYCS/ATP5F1B/ATP5F1D/NDUFS1/NDUFA10/UQCR10/NDUFA4/CYB5A/NDUFS7/COX6A1/UQCRQ/SDHB/COX7C/UQCRFS1/ATP5PB/SDHA/NDUFA13/ATP5PF/COX6B1/NDUFA8/ATP5PD/ATP5MC3/ATP5MC1/COX6C/COX4I1/NDUFB8/NDUFS5/NDUFS8/NDUFA2/SDHD/NDUFA3/UQCRB/UQCRC2/ATP5F1E/UQCRH/ATP5MG/NDUFB3/ATP5ME/NDUFB7/NDUFS6/ATP5MF/NDUFAB1/NDUFA7/SDHC/SURF1/CBARP/NDUFC2/BCL2L1/NDUFS2/ATP5PO/GATB/COX7B/NDUFS4/NDU…
BILANGES_SERUM_AND_RAPAMYCIN_SENSITIVE_GENES	69	0.877482	2.54986	1e-10	3.22966e-09	2.07114e-09	1842	tags=80%, list=4%, signal=76%	RPS5/RPS19/RPL4/EIF3M/RPL13A/RPL7A/EEF1A1/RPL7/RPL28/EEF2/EEF1G/RPS6/RPL18/RPS10/RPL18A/RPS23/RPS16/RPL26/RPL14/RPL8/RPS24/RPL23/RPS13/RPL13/RPL27A/RPS9/TPT1/RPS14/RPS3A/RPS3/RPL29/RPL32/RPS27A/RPS17/RPL36A/RPS8/EIF3H/RPL5/RACK1/RPL15/RPS7/CS/RPS25/EIF3L/EEF1B2/RPL24/FAU/EIF4B/NBEA/RPL6/RPL10/RPS4X/RPL30/NOP53/UBA52
REACTOME_ACTIVATION_OF_THE_MRNA_UPON_BINDING_OF_THE_CAP_BINDING_COMPLEX_AND_EIFS_AND_SUBSEQUENT_BINDING_TO_43S	60	0.903812	2.54611	1e-10	3.22966e-09	2.07114e-09	3372	tags=92%, list=8%, signal=85%	RPS27L/RPS5/RPS19/RPS12/RPSA/RPS28/EIF3M/RPS18/RPS2/RPS6/RPS10/RPS23/RPS16/RPS4Y1/RPS24/RPS13/EIF3K/EIF3I/RPS9/RPS14/RPS3A/RPS3/RPS27/RPS27A/RPS17/RPS8/PABPC1/EIF3H/EIF3C/RPS7/RPS15A/RPS26/RPS25/EIF3L/RPS20/RPS11/FAU/EIF4B/EIF3G/RPS15/EIF3E/EIF2S3/RPS4X/EIF4G1/EIF2S1/RPS21/RPS29/EIF2S2/EIF3B/EIF4E/EIF3J/EIF3D/EIF3A/EIF3F/EIF4A2
REACTOME_PROTEIN_LOCALIZATION	164	0.768139	2.50556	1e-10	3.22966e-09	2.07114e-09	5829	tags=66%, list=13%, signal=58%	CHCHD10/ACOX2/SLC25A6/ACO2/ATP5F1A/GRPEL1/VDAC1/HSPD1/BAAT/CYC1/ATP5F1B/SLC25A4/CYB5A/TOMM40/TIMM8B/SLC25A13/ACAA1/FIS1/RPS27A/ATP5MC1/TIMM17A/VAMP2/TIMM13/NDUFB8/IDH1/HSPA9/CS/SCP2/ABCD3/TOMM20/PEX16/PMPCA/CRAT/TOMM5/TIMM10/PEX11B/SAMM50/COX17/EPHX2/MPV17/ACOT8/HMGCL/PAM16/CHCHD3/UBA52/TOMM70/GET3/PEX6/TIMM17B/PEX3/ACOT2/CAMLG/TIMM50/PMPCB/UBB/PITRM1/PEX19/PHYH/COA6/TIMM23/GET4/IDH3G/ZFAND6/ECH1…
REACTOME_INFLUENZA_INFECTION	156	0.771181	2.50268	1e-10	3.22966e-09	2.07114e-09	3087	tags=61%, list=7%, signal=57%	RPS27L/RPS5/RPS19/SLC25A6/RPL4/RPS12/RPL12/RPSA/RPS28/RPL13A/RPL7A/RPL22L1/RPL7/RPL3/RPL28/RPLP1/RPS18/RPS2/RPS6/RPL18/RPS10/RPL23A/RPL18A/RPS23/RPS16/RPL26/RPL14/RPS4Y1/RPL37A/RPL8/RPS24/RPL23/RPS13/RPLP0/RPL13/POLR2F/RPL27A/RPL31/RPS9/CLTA/RPL11/RPS14/RPS3A/RPL27/RPS3/RPL29/RPL32/RPS27/RPS27A/RPS17/RPL19/POLR2E/RPL36A/RPS8/RPL10A/POLR2L/RPL35/RPL5/RPL15/RPS7/RPS15A/RPL36/RPS26/RPS25/RPL17/RPS20…
REACTOME_SIGNALING_BY_ROBO_RECEPTORS	217	0.735522	2.45662	1e-10	3.22966e-09	2.07114e-09	3614	tags=59%, list=8%, signal=55%	RPS27L/RPS5/RPS19/PSME2/RPL4/RPS12/RPL12/RPSA/RPS28/RPL13A/RPL7A/RPL22L1/RPL7/RPL3/RPL28/RPLP1/RPS18/PSMD8/RPS2/RPS6/RPL18/RPS10/RPL23A/RPL18A/RPS23/RPS16/RPL26/RPL14/RPS4Y1/RPL37A/RPL8/RPS24/RPL23/RPS13/RPLP0/RPL13/PRKCA/RPL27A/ELOB/RPL31/RPS9/RPL11/RPS14/RPS3A/RPL27/RPS3/RPL29/RPL32/RPS27/RPS27A/RPS17/RPL19/RPL36A/PSMA7/RPS8/PABPC1/RPL10A/RPL35/RPL5/RPL15/RPS7/RPS15A/PSME1/PRKACA/RPL36/RPS26/PS…
PECE_MAMMARY_STEM_CELL_UP	138	0.761208	2.44982	1e-10	3.22966e-09	2.07114e-09	4489	tags=66%, list=10%, signal=59%	AKR1C1/RPS19/RPS12/EPS8L2/TUBA4A/TMX2/TALDO1/AK1/RPSA/RPS28/UQCR11/RPL13A/RPL7A/RPL28/NDUFAF8/RPLP1/RPS18/GAS5/RPS2/RPS10/RPL23A/RPL18A/DDT/RPS16/RPL8/RPS13/EIF3K/RPL13/RPL27A/SERPINA3/BAG3/TIMM8B/RPS14/RPS3/APOE/KARS1/COX6C/COX4I1/RPS19BP1/RPL10A/NDUFS5/RPL15/RPS7/CNPPD1/MARS1/TXN/RPS26/ABHD6/RPS25/UQCRB/RPS20/NDUFA11/ATP5F1E/RPL24/CLTB/FAU/TUBB2A/ATP5MG/RPLP2/ATP5ME/EEF1D/EHD4/TRAPPC5/RPL41/RPS…
KEGG_HUNTINGTONS_DISEASE	178	0.74338	2.44416	1e-10	3.22966e-09	2.07114e-09	3156	tags=55%, list=7%, signal=51%	SLC25A6/ATP5F1A/SLC25A5/VDAC1/NDUFV1/UQCR11/COX5A/GPX1/MT-CO2/COX5B/BAX/PLCB4/NDUFB5/CREB3L1/CYC1/COX8A/CYCS/ATP5F1B/SLC25A4/ATP5F1D/NDUFS1/NDUFA10/AP2A1/UQCR10/NDUFA4/VDAC2/NDUFB9/SOD1/POLR2F/MT-ATP6/NDUFS7/COX6A1/UQCRQ/SDHB/COX7C/UQCRFS1/CLTA/ATP5PB/SDHA/ATP5PF/COX6B1/MT-CYB/NDUFA8/ATP5PD/ATP5MC3/POLR2E/ATP5MC1/MT-ATP8/COX6C/COX4I1/NDUFB8/POLR2L/PPARGC1A/NDUFS5/BBC3/NDUFS8/NDUFA2/SDHD/NDUFA3/ND…
REACTOME_COMPLEX_I_BIOGENESIS	55	0.879741	2.44314	1e-10	3.22966e-09	2.07114e-09	3960	tags=87%, list=9%, signal=79%	NDUFV1/NDUFAF2/NDUFB5/NDUFS1/NDUFA10/MT-ND3/NDUFB9/NDUFS7/MT-ND4/NDUFA13/MT-ND2/NDUFA8/NDUFAF6/NDUFB8/MT-ND6/NDUFS5/NDUFS8/NDUFA2/NDUFA3/NDUFV2/NDUFA11/NDUFB10/MT-ND1/NDUFB3/NDUFB7/NDUFS6/NDUFAF4/NDUFAB1/NDUFA7/NDUFC2/NDUFS2/NDUFS4/NDUFS3/NDUFA12/NDUFA9/NDUFAF3/NDUFB11/TMEM126B/MT-ND5/NDUFB2/NDUFA6/NDUFB1/NDUFAF7/NDUFA1/NDUFA5/TIMMDC1/NDUFB6/NDUFV3
CHNG_MULTIPLE_MYELOMA_HYPERPLOID_UP	54	0.873762	2.41431	1e-10	3.22966e-09	2.07114e-09	3526	tags=78%, list=8%, signal=72%	RPS19/RPL4/RPSA/RPL13A/RPL7A/RPL28/RPLP1/EEF2/EEF1G/RPS6/RPL18/RPS23/RPS16/RPL14/RPS13/EIF3K/RPL27A/RPS9/CLTA/RPS14/RPS3/RPL29/RPL32/RPS17/RPL35/RPL15/RPL36/EEF1B2/RPL24/MRPL34/RPLP2/EIF3G/RPS15/RPL37/NPM1/UBA52/QARS1/EIF3J/RPL35A/RPL21/EIF4A2/SCAMP5
REACTOME_MITOCHONDRIAL_PROTEIN_IMPORT	65	0.841513	2.39305	1e-10	3.22966e-09	2.07114e-09	4099	tags=74%, list=9%, signal=67%	CHCHD10/SLC25A6/ACO2/ATP5F1A/GRPEL1/VDAC1/HSPD1/CYC1/ATP5F1B/SLC25A4/TOMM40/TIMM8B/SLC25A13/ATP5MC1/TIMM17A/TIMM13/NDUFB8/HSPA9/CS/TOMM20/PMPCA/TOMM5/TIMM10/SAMM50/COX17/PAM16/CHCHD3/TOMM70/TIMM17B/TIMM50/PMPCB/PITRM1/COA6/TIMM23/IDH3G/CHCHD5/CHCHD7/SLC25A12/CMC2/CHCHD4/TOMM6/TIMM9/TIMM44/TIMM8A/TIMM21/TOMM22/COA4/TIMM22
KEGG_PROTEASOME	46	0.871181	2.35339	1e-10	3.22966e-09	2.07114e-09	4846	tags=85%, list=11%, signal=75%	PSME2/PSMD8/PSMA7/PSME1/PSMD1/PSMB5/PSMB6/POMP/PSMB10/PSMD14/PSMC4/PSMA6/PSMD2/PSMD7/PSMA3/PSMB4/PSMD13/PSMB1/PSMA5/PSMD4/PSMC2/PSMA4/PSMB7/PSMA2/PSMD6/PSMB3/PSME3/PSMC3/PSMC1/PSMB2/PSMF1/PSMD11/PSMC6/PSMC5/SEM1/PSMD12/PSMB8/PSMD3/PSMB9
BURTON_ADIPOGENESIS_5	114	0.745966	2.33732	1e-10	3.22966e-09	2.07114e-09	5313	tags=65%, list=12%, signal=57%	RGCC/ACO2/GRPEL1/TALDO1/UQCR11/ETFB/ECHS1/MRPL15/TMEM97/CEBPA/CYC1/CYCS/PC/AIFM1/COX6A1/PPA1/MRPL12/ACADM/PHB/TOMM40/COQ9/NDUFA8/BCAP31/TIMM17A/MRPL18/RASD1/CISD1/PTGES2/SDHD/PPIF/SLC1A5/PRADC1/ESRRA/NDUFB10/PRDX3/CRAT/UQCRH/MRPL34/ATP5MD/JAGN1/COX17/CHP1/NDUFAB1/MRPS34/POR/RMDN3/PSMA5/TIMM23/PHB2/MRPL20/PLA2G12A/MGST3/PRELID3B/MPC2/GPHN/ACSL1/FDX1/TIMM9/MIGA2/BCL2L13/ISCA2/AK2/TIMM8A/LMAN2/IFNGR…
KEGG_ALZHEIMERS_DISEASE	163	0.715908	2.3307	1e-10	3.22966e-09	2.07114e-09	3960	tags=57%, list=9%, signal=52%	ATP5F1A/HSD17B10/NDUFV1/UQCR11/FAS/COX5A/MT-CO2/COX5B/PLCB4/NDUFB5/CYC1/COX8A/CYCS/ATP5F1B/ATP5F1D/NDUFS1/NDUFA10/UQCR10/NDUFA4/NDUFB9/MT-ATP6/NDUFS7/COX6A1/UQCRQ/SDHB/CALM1/COX7C/UQCRFS1/ATP5PB/SDHA/ATP5PF/COX6B1/MT-CYB/NDUFA8/APOE/ATP5PD/ATP5MC3/APBB1/ATP5MC1/MT-ATP8/COX6C/COX4I1/NDUFB8/ATF6/NDUFS5/NDUFS8/NDUFA2/SDHD/NDUFA3/MAPK3/NDUFV2/UQCRB/UQCRC2/NDUFB10/ATP5F1E/UQCRH/NDUFB3/CACNA1D/NDUFB7/N…
MACAEVA_PBMC_RESPONSE_TO_IR	102	0.755975	2.32945	1e-10	3.22966e-09	2.07114e-09	3523	tags=51%, list=8%, signal=47%	RRM2B/AEN/CDKN1A/RPS27L/EDA2R/ZMAT3/TNFRSF10D/ACTA2/FDXR/SPATA18/FGD3/PVT1/SLC7A6/INKA2/FAS/CCNG1/TRIAP1/ISCU/EI24/BAX/MIR34AHG/F5/TMEM30A/RETSAT/TM7SF3/PHPT1/SESN1/ANXA4/NDUFAF6/BBC3/BLOC1S2/FBXO22/DDB2/MDM2/AMZ2/ASCC3/TNFRSF10B/MAP4K4/ACER2/NSF/POLH/CD70/TRIM22/DENND2D/ITPR2/GLS2/TMEM131/PPM1D/XPC/CMBL/ANKRA2/HECTD3
YAO_TEMPORAL_RESPONSE_TO_PROGESTERONE_CLUSTER_13	177	0.706284	2.31819	1e-10	3.22966e-09	2.07114e-09	4394	tags=62%, list=10%, signal=56%	PSME2/TKT/UQCR11/TMEM205/ETFB/COX5B/NDUFB5/GSR/PCCB/ANAPC13/NUDT16L1/UQCR10/PSAT1/PC/ELOB/COX6A1/GPX4/NDUFA13/ATP5PF/TIMM8B/MICOS13/MRPL18/SF3B5/NDUFB8/NDUFA2/NDUFA3/DYNLRB1/PARK7/GUK1/UQCRB/NEDD8/UQCRC2/MRPL27/ATP5F1E/TMED3/ROMO1/MRPL52/DNAJC15/PPP1R7/MRPS33/TOMM5/FIBP/ATP5MD/TXNDC17/GTF2A2/ATP5MPL/LAMTOR5/PSMA6/RBM3/MIEN1/CHMP2A/SLC35B2/DBNL/OGFR/TAF9/COA3/PRDX2/NDUFS2/ATP5PO/PMPCB/COX7B/PSMA5/…
REACTOME_DEFECTIVE_CFTR_CAUSES_CYSTIC_FIBROSIS	61	0.815168	2.30512	1e-10	3.22966e-09	2.07114e-09	4432	tags=72%, list=10%, signal=65%	PSME2/PSMD8/RPS27A/PSMA7/ERLEC1/PSME1/PSMD1/PSMB5/PSMB6/PSMD9/PSMB10/PSMD14/PSMC4/PSMA6/PSMD2/PSMD7/PSMA3/UBA52/PSMB4/PSMD13/UBB/PSMB1/PSMA5/PSMD4/PSMC2/PSMA4/PSMB7/PSMA2/PSMD6/PSMB3/VCP/OS9/PSME3/PSMC3/PSMC1/PSMB2/PSMF1/PSMD11/PSMC6/PSMC5/SEM1/PSMD12/PSMB8/PSMD3
REACTOME_CROSS_PRESENTATION_OF_SOLUBLE_EXOGENOUS_ANTIGENS_ENDOSOMES	49	0.838078	2.2938	1e-10	3.22966e-09	2.07114e-09	4846	tags=80%, list=11%, signal=71%	PSME2/PSMD8/PSMA7/PSME1/PSMD1/PSMB5/PSMB6/PSMD9/PSMB10/PSMD14/PSMC4/PSMA6/PSMD2/PSMD7/PSMA3/PSMB4/PSMD13/PSMB1/PSMA5/PSMD4/PSMC2/PSMA4/PSMB7/PSMA2/PSMD6/PSMB3/PSME3/PSMC3/PSMC1/PSMB2/PSMF1/PSMD11/PSMC6/PSMC5/SEM1/PSMD12/PSMB8/PSMD3/PSMB9
KIM_ALL_DISORDERS_DURATION_CORR_DN	144	0.708529	2.29343	1e-10	3.22966e-09	2.07114e-09	3153	tags=49%, list=7%, signal=45%	TUFM/TUBA4A/TALDO1/DCXR/PLAAT3/ATP6V0B/ETFB/GPX1/TRAP1/KLHL21/SUCLG1/COX8A/CDIPT/ACOT7/IMPDH2/TMEM147/SLC25A11/RPL13/CRYAB/NDUFS7/UQCRQ/COX7C/CLTA/BCAP31/ATP5MC1/ESYT1/RPS8/COX4I1/EIF6/GRHPR/NDUFS8/PMM1/TAX1BP1/CCT7/ATP6AP1/MAPK3/AHSA1/UQCRB/PSMB5/RABAC1/ATOX1/AKR1B1/EIF3G/RUVBL2/RNH1/PES1/GABBR1/EXOC3/NDUFA7/STARD7/RPS29/CHMP2A/PIN1/B3GAT1/STOML1/GNPDA1/DNAJB2/MRPL23/ACTR1A/NDUFAF3/LMAN2L/FBXO9/…
HSIAO_HOUSEKEEPING_GENES	398	0.64537	2.27053	1e-10	3.22966e-09	2.07114e-09	3978	tags=53%, list=9%, signal=49%	ARHGDIB/FTL/RPS5/RPS19/SLC25A6/RPL4/ATP5F1A/ATIC/SLC25A5/RPL12/RPSA/RPS28/DSTN/RPL13A/RPL7A/AGPAT1/FAS/FUCA1/HSPD1/EEF1A1/RPL7/PRDX1/C1QBP/ECHS1/MSN/PSAP/RPL3/RPL28/CD81/RPLP1/RPS18/GPX1/EEF2/EEF1G/PSMD8/RPS2/RPS6/RPL18/RPS10/MPRIP/RPL23A/RPL18A/COX8A/FKBP1A/CST3/ATP5F1B/DDT/GSTP1/RPS23/RPS16/RPL14/SARS1/RPL37A/RPL8/NDUFA4/VDAC2/RPL23/RFTN1/RPLP0/RPL13/SOD1/ATP6V1F/RPL27A/RPL31/COX6A1/COX7C/GPX4/…
REACTOME_METABOLISM_OF_POLYAMINES	59	0.810937	2.2699	1e-10	3.22966e-09	2.07114e-09	4432	tags=71%, list=10%, signal=64%	NQO1/PSME2/PSMD8/SRM/AMD1/PSMA7/PSME1/PSMD1/PSMB5/PSMB6/PSMD9/PSMB10/PSMD14/PSMC4/PSMA6/PSMD2/PSMD7/PSMA3/PSMB4/PSMD13/PSMB1/PSMA5/PSMD4/PSMC2/PSMA4/PSMB7/PSMA2/PSMD6/PSMB3/PSME3/PSMC3/PSMC1/AZIN2/PSMB2/PSMF1/PSMD11/PSMC6/PSMC5/SEM1/PSMD12/PSMB8/PSMD3
REACTOME_ABC_FAMILY_PROTEINS_MEDIATED_TRANSPORT	103	0.731409	2.25801	1e-10	3.22966e-09	2.07114e-09	4922	tags=61%, list=11%, signal=54%	PSME2/PSMD8/ABCA12/ABCC2/RPS27A/PSMA7/ERLEC1/PSME1/PSMD1/PSMB5/ABCD3/PSMB6/PSMD9/PSMB10/PSMD14/PSMC4/ABCB6/EIF2S3/ABCC10/EIF2S1/PSMA6/PSMD2/PSMD7/PSMA3/UBA52/PSMB4/EIF2S2/PEX3/PSMD13/UBB/PSMB1/PSMA5/PSMD4/PEX19/ABCC4/PSMC2/PSMA4/PSMB7/PSMA2/ABCC1/ABCB8/ABCF1/PSMD6/PSMB3/VCP/OS9/PSME3/PSMC3/PSMC1/PSMB2/PSMF1/PSMD11/PSMC6/PSMC5/ABCA7/SEM1/PSMD12/PSMB8/PSMD3/ABCD1/ABCB7/PSMB9/ABCA4
REACTOME_DEGRADATION_OF_DVL	57	0.811809	2.25692	1e-10	3.22966e-09	2.07114e-09	4432	tags=77%, list=10%, signal=69%	PSME2/PSMD8/RPS27A/PSMA7/PSME1/PSMD1/PSMB5/PSMB6/PSMD9/PSMB10/PSMD14/PSMC4/PSMA6/PSMD2/PSMD7/PSMA3/UBA52/PSMB4/PSMD13/UBB/PSMB1/PSMA5/PSMD4/DVL1/PSMC2/PSMA4/PSMB7/PSMA2/PSMD6/PSMB3/CUL3/PSME3/PSMC3/PSMC1/PSMB2/PSMF1/PSMD11/KLHL12/PSMC6/PSMC5/SEM1/PSMD12/PSMB8/PSMD3
STEIN_ESRRA_TARGETS_UP	383	0.643556	2.25647	1e-10	3.22966e-09	2.07114e-09	5191	tags=54%, list=12%, signal=48%	TACC2/HTATIP2/GAS6/HIGD1A/MPC1/FDXR/GDF15/ACADSB/CYP1A1/ACAT1/SLC25A20/ACO2/IDH3A/GRPEL1/AK1/SULT1A2/NDUFV1/ISOC2/MRPL15/ISCU/COX5A/RAB17/COX5B/CPT1A/RAP1GAP/FH/SUCLG1/NDUFB5/PDHX/CYCS/SLC25A4/EPN3/ST6GALNAC4/SLC46A3/NDUFS1/NDUFA10/VDAC2/MRPL4/EIF3K/ACY1/AIFM1/WWC1/HMOX2/MRPS12/NDUFS7/SDHB/AKAP1/STEAP3/ACADM/MECR/DHRS11/COQ9/UQCRFS1/MDH2/SDHA/ATP5PF/NDUFA8/ACAA1/ATP5MC3/ATP5MC1/TIMM17A/NECAB3/VWA…
REACTOME_RRNA_MODIFICATION_IN_THE_NUCLEUS_AND_CYTOSOL	59	0.805655	2.25512	1e-10	3.22966e-09	2.07114e-09	7156	tags=81%, list=16%, signal=68%	RCL1/RPS2/RPS6/WDR46/DDX49/DCAF13/RPS9/WDR3/SNU13/RPS14/NOP14/BUD23/PNO1/RPS7/TSR3/RRP9/NOL6/NHP2/RRP36/IMP4/UTP3/UTP18/EMG1/WDR43/NAT10/UTP4/RRP7A/UTP6/PDCD11/NOP2/TBL3/DKC1/UTP11/UTP15/FBL/UTP14A/NOP56/DHX37/DIMT1/UTP20/BMS1/MPHOSPH10/NOC4L/GAR1/IMP3/PWP2/WDR75/NOP58
BURTON_ADIPOGENESIS_6	182	0.681933	2.25143	1e-10	3.22966e-09	2.07114e-09	3910	tags=52%, list=9%, signal=47%	FAH/CDIP1/TUFM/TKT/ME1/PARM1/MCCC1/IMPDH1/WFDC12/MPDU1/SUCLG1/NDUFB5/GSR/DDT/ATP5F1D/NDUFS1/UQCR10/CYB5A/NDUFB9/TST/UQCRQ/SDHB/RETSAT/GCSH/SDHA/LCN2/SLC25A1/APOE/ACAA1/BCAT2/C20orf27/LDHB/NDUFB8/GRHPR/APMAP/OGDH/CS/QDPR/CD151/UQCRB/SCP2/UQCRC2/DECR1/ALDH1A1/NNMT/DNAJC15/NDUFB3/PDHB/BCKDHB/NDUFB7/SAMM50/PNPLA2/MAP4K4/ALAD/SDHC/CHCHD3/HSD17B12/ATP5PO/SLC25A10/COX7B/EHD1/FASN/CAVIN2/PEX19/NDUFS3/COX…
REACTOME_AUF1_HNRNP_D0_BINDS_AND_DESTABILIZES_MRNA	55	0.809979	2.24941	1e-10	3.22966e-09	2.07114e-09	4432	tags=80%, list=10%, signal=72%	PSME2/PSMD8/HSPA8/RPS27A/PSMA7/PABPC1/PSME1/PSMD1/PSMB5/PSMB6/PSMD9/PSMB10/PSMD14/PSMC4/EIF4G1/PSMA6/PSMD2/PSMD7/PSMA3/UBA52/PSMB4/PSMD13/UBB/PSMB1/PSMA5/PSMD4/PSMC2/PSMA4/PSMB7/PSMA2/PSMD6/PSMB3/PSME3/PSMC3/PSMC1/PSMB2/PSMF1/PSMD11/PSMC6/PSMC5/SEM1/PSMD12/PSMB8/PSMD3
REACTOME_DEGRADATION_OF_GLI1_BY_THE_PROTEASOME	60	0.797694	2.24717	1e-10	3.22966e-09	2.07114e-09	4432	tags=73%, list=10%, signal=66%	PSME2/PSMD8/RPS27A/PSMA7/PSME1/PRKACA/PSMD1/PSMB5/PSMB6/PSMD9/PSMB10/PSMD14/PSMC4/PSMA6/PSMD2/PSMD7/SKP1/PSMA3/UBA52/PSMB4/PSMD13/UBB/PSMB1/PSMA5/PSMD4/PSMC2/PSMA4/PSMB7/PSMA2/PSMD6/PSMB3/PSME3/PSMC3/PSMC1/PSMB2/PSMF1/PSMD11/PSMC6/PSMC5/SEM1/CUL1/PSMD12/PSMB8/PSMD3
TAKAO_RESPONSE_TO_UVB_RADIATION_UP	86	0.744199	2.24543	1e-10	3.22966e-09	2.07114e-09	3989	tags=62%, list=9%, signal=56%	RPS5/RPS28/ATP6V0B/MSN/ISCU/COX5A/GPX1/COX5B/COX8A/RPS4Y1/NDUFA4/ACOT7/RPLP0/SOD1/RPL27A/COX6A1/GPX4/RPS9/UQCRFS1/ATP5MC3/RPL36A/COX6C/COX4I1/RPL10A/POLR2L/CDC37/TXN/RPS25/PRDX3/GRN/EEF1D/PSMA6/CCDC85B/BAK1/PRDX2/FTH1/UBB/COX7B/PFDN5/COX7A2/CLP1/TCP1/UBXN1/PIGH/RPL21/SELENOW/TSC22D1/MRPL49/PPP1R11/H2AC18/DYNLL1/SEM1/VIPR2
MOOTHA_PGC	414	0.634264	2.2444	1e-10	3.22966e-09	2.07114e-09	5023	tags=55%, list=12%, signal=49%	PDK4/GLRX/GHITM/AKR1B10/GDF15/SMPD1/TUFM/SLC25A20/ACO2/ATP5F1A/TMX2/IDH3A/ME1/SLC25A5/GRPEL1/AK1/HSD17B10/TCN2/HSPD1/ETFB/TRIAP1/MRPL15/COX5B/NINJ1/AURKAIP1/POLDIP2/CPT1A/ATP1A1/FH/VIPR1/SUCLG1/NDUFB5/NFS1/CYC1/COX8A/CYCS/DDT/SLC25A4/ST6GALNAC4/UQCR10/ACOT7/SLC25A11/MRPL4/AIFM1/HSPE1/RHOD/POLR2F/MRPS12/COX6A1/SDHB/COX7C/AKAP1/MTCH2/GPX4/VAMP8/TXN2/ACADM/TOMM40/MDH2/SDHA/HADHB/LCN2/HSPA4L/SPSB2/TI…
REACTOME_TP53_REGULATES_METABOLIC_GENES	86	0.743011	2.24184	1e-10	3.22966e-09	2.07114e-09	4905	tags=67%, list=11%, signal=60%	RRM2B/TXNRD1/G6PD/PRDX1/COX5A/MT-CO2/COX5B/GPX2/GSR/COX8A/CYCS/SESN2/NDUFA4/COX6A1/COX7C/COX6B1/RRAGC/SCO1/SESN1/YWHAB/COX6C/COX4I1/SCO2/COX14/TXN/LAMTOR3/LRPPRC/RRAGA/LAMTOR5/PRKAG2/SURF1/LAMTOR1/PRDX5/PRDX2/TACO1/PRKAB2/COX7B/MT-CO3/GLS2/RHEB/LAMTOR4/MT-CO1/COX20/PRKAG1/YWHAG/COX18/MLST8/SLC38A9/COX7A2L/COX16/LAMTOR2/DDIT4/TIGAR/RRAGB/TSC1/COX11/SESN3/MTOR
REACTOME_CRISTAE_FORMATION	31	0.89253	2.21535	1e-10	3.22966e-09	2.07114e-09	2292	tags=81%, list=5%, signal=76%	ATP5F1A/ATP5F1B/ATP5F1D/MICOS10/MT-ATP6/ATP5PB/ATP5PF/APOOL/ATP5PD/ATP5MC3/ATP5MC1/MT-ATP8/MICOS13/HSPA9/ATP5F1E/ATP5MG/IMMT/ATP5ME/SAMM50/ATP5MF/CHCHD3/ATP5PO/TMEM11/CHCHD6/ATP5F1C
YAO_TEMPORAL_RESPONSE_TO_PROGESTERONE_CLUSTER_17	183	0.652896	2.15629	1e-10	3.22966e-09	2.07114e-09	4640	tags=58%, list=11%, signal=52%	TXNRD1/LYPLA1/GRPEL1/TALDO1/SLC25A39/FUCA1/EI24/AURKAIP1/PSMD8/NAA10/FKBP1A/DDT/GSTP1/IMPDH2/BPGM/PC/NDUFB9/MRPS12/UQCRQ/SDHB/CALM1/PRELID1/CYB5R1/MDH2/NME2/PSMA7/MRPL36/TIMM13/STUB1/MRPL18/SMDT1/PDCD2/LRPAP1/DDX54/NDUFV2/ADSL/NDUFA11/CNIH1/ROMO1/PSMB6/MRPL34/DOHH/PSMD14/NDUFB7/SAMM50/MRPS7/COPE/NDUFS6/CAPN2/BAG1/PSMG1/MRPL21/NDUFAB1/DRAP1/MRPS34/STARD7/MRPS14/SLIRP/CSNK2B/TOMM70/LAMTOR1/CIAO2B/H…
REACTOME_FATTY_ACID_METABOLISM	177	0.649833	2.13291	1e-10	3.22966e-09	2.07114e-09	5330	tags=48%, list=12%, signal=42%	PON3/ACOX2/ACSL5/HPGD/CYP4B1/CYP1A1/SLC25A20/CPT2/ACSM3/ECHS1/ALOX15B/GPX1/CPT1A/CYP1B1/GPX2/PCCB/HADHA/GGT5/ACOT7/CBR1/GPX4/ACADM/MECR/HADHB/SLC25A1/ACAA1/PLA2G4A/PTGES2/AKR1C3/MMUT/ACADVL/ACOXL/SCP2/ACSF3/ELOVL4/DECR1/CRAT/CYP2J2/ELOVL1/EPHX2/ACOT8/NDUFAB1/PCCA/PRKAG2/ACBD6/PON1/ACSF2/HSD17B12/SLC22A5/ACOT2/PRKAB2/ALOX12B/FASN/PHYH/PPT1/HACL1/ABCC1/HADH/MLYCD/TECR/HSD17B4/GGT1/ALOX5/MCEE/NUDT19…
KIM_MYC_AMPLIFICATION_TARGETS_UP	200	0.63611	2.10896	1e-10	3.22966e-09	2.07114e-09	4705	tags=47%, list=11%, signal=42%	KLHL29/RPS27L/LYPLA1/PEMT/IDH3A/SLC25A5/PVT1/RPL12/RAB3C/NMNAT2/RPSA/SLC25A39/HSPD1/NDUFAF2/LTF/SUCLG1/RPL18A/CYCS/ATP5F1B/RPS23/NDUFS1/AIFM1/ETFA/NME1/MRPS23/RIOX2/PRDX6/WDR3/RPL11/COX6B1/NME2/DDX21/LDHB/KARS1/MRPL36/NIFK/RPL5/GOT2/MCTS1/EEF1E1/RPS15A/PARK7/MRPS2/FARSB/RHOB/RRP9/PDHA1/CITED4/MRPS33/AKR1B1/LRPPRC/LRRK2/EPB41L4B/FAM216A/DGKZ/PSMG1/LRRC28/RPS4X/MRPS34/EIF2S2/GPATCH4/HSD17B12/COX7B/…
SHEPARD_CRUSH_AND_BURN_MUTANT_UP	198	0.624508	2.06964	1e-10	3.22966e-09	2.07114e-09	5522	tags=51%, list=13%, signal=45%	RPS27L/RGCC/CHCHD10/HIGD1A/CCNG1/IMPDH1/RRS1/BAX/FST/FTSJ1/MYBBP1A/BOP1/WDR46/DDX49/MRPL12/DNAJA3/KLF2/ATP5IF1/ZPR1/BOLA3/EIF6/TSFM/BUD23/HSPA9/PTGES2/AP1M2/HSPA4/MARS1/ZNF593/TOMM20/REXO2/MDM2/MRPL52/STARD10/RRP9/NOL6/PPM1H/SAMM50/ELOVL1/SLC3A2/WDR12/PES1/ZNF622/CYP24A1/NOL7/ANGPTL3/RBP4/NOP9/TAF9/MRPS18B/RPF2/MEGF6/IMP4/OLA1/EMC8/UTP3/PTPMT1/EIF4E/PHB2/PINX1/WRAP73/HTRA2/SRPRB/NSUN2/ZNF330/SLC1…
FISCHER_DIRECT_P53_TARGETS_META_ANALYSIS	310	0.59037	2.04156	1e-10	3.22966e-09	2.07114e-09	4872	tags=45%, list=11%, signal=41%	TNFRSF10C/RRM2B/AEN/GREB1/CDKN1A/RPS27L/EDA2R/CDIP1/SNX2/ZMAT3/TNFRSF10D/GNAI1/ACTA2/FDXR/GDF15/RPS19/SPATA18/EPS8L2/H2BC21/INKA2/FAS/CCNG1/ALDH1A3/TRIAP1/APOD/EML2/NDUFAF8/ISCU/GPX1/EI24/NINJ1/BAX/SULF2/ABCA12/SARS1/F5/SESN2/PRDM1/RETSAT/TM7SF3/HSPA4L/RCBTB1/KLHDC7A/PHPT1/GASK1B/GABARAPL2/PHLDA3/SESN1/ANXA4/AK3/BBC3/CLCA2/LRPAP1/BLOC1S2/FBXO22/COQ8A/PARD6G/DDB2/MDM2/TLCD1/AMZ2/TSPAN11/ASCC3/SCRI…
TIEN_INTESTINE_PROBIOTICS_24HR_DN	215	0.603014	2.00855	1e-10	3.22966e-09	2.07114e-09	5041	tags=50%, list=12%, signal=44%	NQO1/GLRX/FTL/AKR1B10/AKR1C1/TXNRD1/GDF15/RPS19/RPL4/PDCD4/RPL12/CD55/RPL13A/EIF5A/EEF1A1/RPL3/RPS18/EEF2/EEF1G/RPS2/RPS6/RPL23A/RPS23/GCNT3/ST6GALNAC4/SARS1/RPL37A/RPS24/RPL23/RPLP0/RPL13/RPL27A/HSPA8/MLPH/TPT1/LAMP3/RPS14/RPS3A/RPS3/RPS27/GARS1/PABPC1/RPL5/RACK1/HSPA9/PRR15L/RPS7/WARS1/SLC1A5/RPS11/MAP2K2/GOT1/SQSTM1/HSPA5/SNHG32/EIF4B/SLC3A2/RPL10/IFRD1/RPL41/NBR1/FTH1/FAM120A/RPL39/PLAAT4/AFT…
HOSHIDA_LIVER_CANCER_SUBCLASS_S3	264	0.588501	2.00549	1e-10	3.22966e-09	2.07114e-09	4845	tags=42%, list=11%, signal=38%	PDK4/PON3/FAH/PAPSS2/ACOX2/ALDH4A1/AKR1C1/MAOA/C4BPA/EMP2/ACADSB/SRD5A1/ALDH2/ALDH6A1/IDH3A/HSD17B10/CPS1/ECHS1/GSTA2/CD81/COX5B/BAAT/ALDH1B1/FH/GPX2/PCCB/ATP5F1D/FOXO1/F5/CYB5A/ACY1/SOD1/TST/HMOX2/SDHB/CBR1/SERPINA3/ACADM/EPHX1/ATP5PF/ALPL/APOH/MAPRE3/CD302/GOT2/BDH1/MMUT/NDUFV2/ACADVL/QDPR/SHB/UQCRB/PAH/BLVRB/ACO1/RHOB/DECR1/ATOX1/ALDH1A1/NNMT/TPMT/EPAS1/CYP2J2/POLD4/PTS/CPB2/PCCA/ADK/LONP1/SMA…
ACEVEDO_NORMAL_TISSUE_ADJACENT_TO_LIVER_TUMOR_DN	354	0.564831	1.96481	1e-10	3.22966e-09	2.07114e-09	5313	tags=45%, list=12%, signal=40%	CHCHD10/MAOA/ACADSB/CDA/RPL12/PLAAT3/DESI1/GSTA2/COX5B/NINJ1/EEF2/CLPTM1/AHCY/FST/TMEM97/DGAT2/OAT/CYP39A1/ZNHIT1/MACROD1/SOD1/TST/POLR2F/SDHB/CNDP2/RETSAT/GNPTG/NSDHL/TPRG1L/ALPL/SLC25A1/ABCC2/RPL19/GTF3A/SND1/ABHD14B/TM7SF2/NDUFB8/LRP5/AK3/CD99L2/HAGH/GOT2/SH3BGRL2/SSU72/SLC16A11/ABHD6/RPS25/SLC50A1/PRADC1/HSPA5/ROMO1/STARD10/CAPN6/COQ10B/MXD4/NNMT/MYOM2/SLC25A15/LTBR/UROD/DNAJA1/SLC35B1/WBP2/H…
SWEET_LUNG_CANCER_KRAS_UP	470	0.50433	1.80965	1e-10	3.22966e-09	2.07114e-09	5130	tags=41%, list=12%, signal=37%	GLRX/CDKN1A/RGCC/ACSL5/IFI30/CTSH/G6PD/ME1/ATP6V0D1/AK1/CITED2/SLC25A39/FUCA1/PARM1/TGFBI/KRT7/PSAP/RPL3/C16orf89/RPL28/RPS18/EEF2/GAS5/RAP1GAP/RPS2/ATP1A1/CCT3/NAPSA/CEBPA/ITGA8/SFTPB/PSAT1/RPL8/TMEM30A/CNDP2/ERRFI1/PRELID1/VAMP8/LAP3/CYB5R1/HSPA8/LCN2/CTSA/NME2/AVPI1/POLR2E/RRBP1/VAMP2/SLC34A2/RPS8/SND1/ANXA4/GARS1/PABPC1/SPG21/RPL10A/GRHPR/SPP1/ATP6V0C/BTG3/RACK1/HSPA9/HM13/CD9/PSME1/ITGB2/RPL…
CUI_TCF21_TARGETS_2_UP	425	-0.487439	-1.83233	1e-10	3.22966e-09	2.07114e-09	4071	tags=38%, list=9%, signal=35%	BRI3BP/MMP16/TMEM176B/NFATC4/PCBP4/MIF/BEX1/RGS17/LGI2/IGFBP2/ACTB/PTN/HELLS/NRP2/NPHP1/SLC38A1/HMGXB4/SYNE2/RTL6/EPHA4/ZFPM2/SOAT1/WDR34/CENPV/SUV39H1/PRIM1/HOMER2/CKAP5/LHFPL2/C1orf112/EPB41L4A/TYMS/ADCY2/MISP/BCL7A/POLD1/NFIA/CHAF1B/HMMR/RAD51/TGFB3/CDCA7L/PFKL/KCNK5/VASH2/SERTAD4/PDLIM4/EVC2/PYCR1/IL33/SOCS2/FBLN5/CTHRC1/MCM7/CAD/RFC3/SIX2/COL1A1/EFS/MMP11/CDT1/SALL2/EYA1/HNRNPU/EXOSC8/GALK1/…
FOSTER_TOLERANT_MACROPHAGE_DN	408	-0.489933	-1.83571	1e-10	3.22966e-09	2.07114e-09	4899	tags=39%, list=11%, signal=35%	TNFRSF12A/FOXP1/PFKFB3/IL13RA1/NOCT/LUZP1/FNBP4/RIN2/MT1E/SPRED1/STAT3/ARMC8/ARHGEF3/RNF125/AKT3/VEZT/USP42/TLK2/SLCO3A1/CD83/TAB2/SOCS7/PHLDB1/SHISA3/NFKB1/BCL3/TJP2/NOD1/PHC2/RIPK2/DGKA/JARID2/IL1B/BCL9/GBP6/LRCH1/SLC16A1/LIPG/TANC1/COL27A1/TMCO3/MAFK/TMTC2/ADGRG6/RND3/JDP2/PTGS2/KAT6A/PDE4B/SEMA4C/SNX10/TRAF1/ETV6/DAAM1/TNC/NFXL1/GNA15/SLC30A4/ZBTB8A/REL/ZC3H7A/IL6/WDR59/AGRN/FZD1/CREB5/AFF1/I…
VECCHI_GASTRIC_CANCER_EARLY_UP	431	-0.489064	-1.8409	1e-10	3.22966e-09	2.07114e-09	3051	tags=37%, list=7%, signal=35%	CENPW/E2F8/ZNF592/AGO2/EFNA2/FEN1/FAM72C/ZNF511/XRCC4/PGRMC1/SPDL1/FUBP1/C8orf33/HSPB1/CDC20/PARPBP/SFR1/HMMR/CLDN1/NUP58/MACC1/CENPN/MELTF/S100A10/SPIN4/WDR72/MTFR2/MCM7/RFC3/ARL5B/TFAP2A/JPT2/MCF2L/CCNB1/WDR90/NASP/AURKA/BRCA1/CDC6/ENO1/NUP62CL/PFKP/UHRF1/DTL/POLD3/SLC28A3/SMARCE1/MAD2L1/GINS1/TNRC18/NEK2/COL7A1/DEPDC1/MCM2/NUF2/ESCO2/FIGNL1/LAMC2/EPPK1/RRM2/SKA3/MCM10/FANCD2/ECT2/PBK/FANCI/MYO…
LIU_PROSTATE_CANCER_DN	489	-0.491043	-1.86454	1e-10	3.22966e-09	2.07114e-09	4505	tags=41%, list=10%, signal=37%	PRSS23/GPRASP1/KCNJ3/GPC6/ZNF536/COL9A1/KANK2/PPP3CC/GPM6B/RBM33/GNAL/TGFB1I1/HLA-E/KIT/SLCO3A1/C20orf194/AJUBA/ZBTB47/TAGLN/MCAM/BCL2/OTULIN/SYNPO2/NID1/LAMB1/ITGA1/GRK5/PPP1R12A/SNX7/IGF2/KCNJ8/PLCL1/ZCCHC14/FBN1/AHNAK2/KLF8/ICA1L/KRT17/C12orf75/U2SURP/SH3BGRL/TNRC6A/GSTM1/COL27A1/ITIH5/DSC3/PARP6/S100A4/WDR33/TGFBR3/DTNA/S100PBP/STOX2/PDGFD/DENND2B/RIMKLB/EOGT/CXCL17/ENAH/NDNF/CRISPLD2/PDGFC/L…
BENPORATH_ES_1	377	-0.50294	-1.87802	1e-10	3.22966e-09	2.07114e-09	3632	tags=39%, list=8%, signal=36%	GINS2/PNN/EXOSC9/MTF2/HELLS/JARID2/PRIM2/UGP2/SINHCAF/SLC16A1/SLC38A1/NUDT21/MYO19/PRIM1/FEN1/WDHD1/DIDO1/NUP37/TUBB2B/MRE11/CCAR1/CER1/ANGEL2/BCL2L12/SFRP1/SALL4/RAB3B/DDIAS/JADE1/FUBP1/LARP7/CDC20/PARPBP/HMMR/ST6GAL1/CXADR/NFYB/SIRT1/BMPR1A/ADGRG2/ROBO1/FABP5/L1TD1/OIP5/ORC1/MED14/CRABP2/PARP1/CNTNAP2/HPS3/MCM7/SRSF1/RFC3/FANCL/KLHL7/MIS18A/ARL5B/MSH6/CCNB1/KPNA2/NASP/PRKD3/CDT1/RNF138/PSIP1/CD…
LINDGREN_BLADDER_CANCER_CLUSTER_1_DN	375	-0.51272	-1.91094	1e-10	3.22966e-09	2.07114e-09	3938	tags=40%, list=9%, signal=37%	HSD3B7/SFMBT1/CENPE/MCAM/IER2/SLC9A3R1/GINS2/ATG9B/GNB3/NRP2/ZNF148/TRIP13/POC1A/GRK5/TNFAIP1/PITX2/ZNF286A/LOXL2/PLCXD1/STAG2/WDHD1/SMURF1/S100A4/CLDN4/ABI3BP/PDE1A/EXO1/PIK3C2B/PRRC1/H2AZ1/HMGCS1/HILPDA/CASP6/ENAH/HIP1/TNC/MNX1/SH3KBP1/FYN/CHAF1B/PATL1/RAD51/ZDHHC18/SLC43A3/CENPN/NFKB2/SRGAP2/DLGAP4/PYCR1/ORC1/PSRC1/RNASEH2A/RFC3/INSIG1/CLIC4/MAP3K14/CAPG/AMOTL2/CCNB1/KPNA2/AURKA/CDT1/BRCA1/CDC…
GABRIELY_MIR21_TARGETS	288	-0.538593	-1.96438	1e-10	3.22966e-09	2.07114e-09	5830	tags=48%, list=13%, signal=42%	GPD2/TENT5A/ALS2/YOD1/TAF1/CEMIP2/ZNF587/MEIS1/ZYG11B/ITSN2/FBXL17/PIK3R1/ATAD2B/THOC2/VPS54/AGO4/IPP/RAB11FIP2/SMC1A/CDC25A/MPP5/FIGN/B3GALNT1/LATS1/STAT3/KLHL24/DYNC1LI2/RECK/SCAF11/DOCK10/RASEF/TRIM33/GTF2I/USP47/ZBTB38/IREB2/PTPDC1/ZRANB1/SNX13/MGA/FAM102B/HECTD1/LONRF2/DDX3X/ZNF286A/SYNE2/CERS6/EPHA4/KBTBD6/SLC9A6/VPS36/TRIM2/RP2/PRRC1/NIPBL/SOWAHC/ENAH/MINDY2/KLHL8/ZBTB20/ST6GAL1/ADGRG2/VAS…
ZHANG_BREAST_CANCER_PROGENITORS_UP	431	-0.522627	-1.96724	1e-10	3.22966e-09	2.07114e-09	4993	tags=46%, list=11%, signal=41%	SMCHD1/VPS54/ZRANB2/NUDCD1/METTL9/RNF6/RNMT/CLDN12/ZNF560/CD38/MYB/MARCHF6/CDC25A/ACYP1/EDAR/HNRNPA1/FAM13B/AUTS2/ARPP19/GPM6B/DBF4/AKAP9/CDC73/SYNCRIP/ZFAND4/ADH5/DUSP11/TMTC4/AJUBA/IFT81/ZNF22/MED6/BCL2/NUP85/LRRC40/INTS2/PTPN14/ACTL6A/EFCAB7/PRPS2/HELLS/MLLT3/ZNF148/AP1S3/ANKRD26/AHR/TRIP13/XRCC5/SLC38A1/RRAGD/SAP30/CTCF/PRIM1/SKA2/KCTD15/HNRNPDL/ZNF24/H2AZ1/GTF2H2C/HNRNPA2B1/C1orf112/TRRAP/CE…
POOLA_INVASIVE_BREAST_CANCER_UP	273	-0.545346	-1.9737	1e-10	3.22966e-09	2.07114e-09	3859	tags=31%, list=9%, signal=28%	NET1/GPR183/LILRB2/GINS2/CDKN3/LMO3/TRIP13/NCF2/GPR171/SLC16A3/SOAT1/BCAT1/TYMS/RSAD2/IMPAD1/TRAF1/TNC/CDC20/CCNE2/RGS4/MAN1A1/COL5A1/STK17B/LOXL1/OIP5/CNTNAP2/ISG20/CTSS/CEACAM5/MMP11/AURKA/APOBEC3B/SPC25/SOX11/DTL/KIF2C/MAD2L1/GINS1/NEK2/BLM/EPPK1/RRM2/PBK/FANCI/NCAPG/PLAUR/COL5A2/MCM4/RAD51AP1/AHI1/NID2/INHBA/ITGA4/PCLAF/CCN4/NDC80/KIF20A/CENPA/CENPU/CEP55/COL11A1/CCNB2/CENPF/GPSM2/CDK1/CCDC88…
REACTOME_EXTRACELLULAR_MATRIX_ORGANIZATION	299	-0.539732	-1.97611	1e-10	3.22966e-09	2.07114e-09	4468	tags=32%, list=10%, signal=29%	PTPRS/ADAMTS3/COL9A1/COL4A3/COL4A4/ADAM10/ITGB4/MMP16/TNXB/CTSK/ADAM9/SDC3/P4HA2/NID1/LAMB1/ITGA1/MATN3/FBN1/LOXL2/COL27A1/MMP10/COLGALT1/LRP4/PXDN/TNC/MUSK/ITGA10/COL5A1/TGFB3/COL4A6/PHYKPL/LOXL1/AGRN/ITGA6/COL1A2/EMILIN2/FBLN5/ITGB8/FBN2/CTSS/COL1A1/ADAM17/MMP11/MMP14/LAMC1/MMP2/COL14A1/PDGFB/COL7A1/LAMC2/LTBP4/SPOCK3/FGF2/COL5A2/CDH1/NID2/ITGA4/PLOD1/SH3PXD2A/COL18A1/COL16A1/P3H3/COL3A1/P3H1/C…
GOLDRATH_ANTIGEN_RESPONSE	354	-0.537534	-1.9942	1e-10	3.22966e-09	2.07114e-09	3067	tags=38%, list=7%, signal=36%	LYN/E2F8/PRIM1/SH3BGRL/FEN1/HASPIN/S100A4/H2AZ1/DENND5A/TYMS/CARHSP1/LGALS3/HMGN2/SNX10/TPI1/SPDL1/CDC20/FYN/RAD51/NUDT4/HAUS6/HSPA2/SOCS2/S100A10/PGM2/PLP2/CLIC4/SLC4A7/PIM1/RAD21/MT1X/CAPG/CCNB1/PSMC3IP/KPNA2/AURKA/CCNF/CCDC50/RRM1/TPM4/BRCA1/CDC6/DNA2/RFC5/CHAF1A/SSX2IP/PLK1/CRYBG1/CDKN2C/CASP1/C4orf3/DTL/POLA1/KIF2C/MAD2L1/ASF1B/NEK2/RELL1/LXN/EMP3/GAPDH/GMNN/FIGNL1/RRM2/WEE1/MCM10/MDFIC/ECT2…
VANTVEER_BREAST_CANCER_ESR1_DN	266	-0.552344	-1.99901	1e-10	3.22966e-09	2.07114e-09	3972	tags=39%, list=9%, signal=35%	SYNCRIP/FAM171A1/TNF/CEBPG/IMPA2/FOXN2/PRIM2/UGP2/VGLL1/GSDMC/LYN/RBM38/MALL/FNDC3B/IFNAR2/COLGALT1/C1orf112/PPP1CB/CDC20/DIAPH3/SLC43A3/KCNK5/HAPLN3/SH3BP1/EPHA2/CORO1C/S100A10/RBMS1/FANCA/PIM1/PGBD5/CA9/MPZL1/DAPK1/GPRIN2/UGT8/NASP/ENO1/APOBEC3B/PFKP/KIF2C/TNFAIP3/ARNTL2/MID1/GPR180/GAPDH/BLM/SKA3/TOPBP1/GPRC5B/ATL3/CDCA7/PIMREG/PRR11/PGM1/MYBL2/TES/MCM6/NMB/LMO4/RAD54L/TMEM123/CENPA/CTSV/CEP55…
CHARAFE_BREAST_CANCER_LUMINAL_VS_MESENCHYMAL_DN	465	-0.530265	-2.0035	1e-10	3.22966e-09	2.07114e-09	4085	tags=41%, list=9%, signal=37%	CYP26B1/PARVA/TGFB1I1/UBE2S/DPYD/FAM171A1/DOCK10/MAP7D1/WRAP53/SERPINB1/MCAM/EIF5A2/CCDC82/PDE3A/LAMB1/ITGA1/CMTM3/GRK5/SNX7/CLIP2/FBN1/AHNAK2/LOXL2/RBMS3/SOAT1/LYN/C17orf49/CENPV/FOXF2/FAM200B/GLIS3/SV2A/NR2F1/SMAD9/CPNE2/BCAT1/SFRP1/AK5/EXTL2/DENND5A/PTGS2/TYMS/PROS1/ANXA5/EHBP1/DCBLD2/ATP10D/SPDL1/PDGFC/PXDN/SH3KBP1/CDC20/RGS4/GNG2/FER/LARP6/NONO/ZC3H12C/COL5A1/RAB8B/EGFR/CAV2/STX2/MXRA7/SPAG9…
FOURNIER_ACINAR_DEVELOPMENT_LATE_2	280	-0.552122	-2.00382	1e-10	3.22966e-09	2.07114e-09	4513	tags=46%, list=10%, signal=41%	HSP90B1/CDC25A/RFWD3/PLEK2/MYH9/ACTG1/WBP11/GFPT1/P3H4/DBF4/YWHAH/MBNL1/SMPD4/GINS2/NUP85/PHC2/ACTB/CDKN3/TRIP13/SNRPA1/DHX15/SF3B3/FEN1/DDX39B/NUP37/CKAP5/PHTF2/H2AZ1/COLGALT1/RND3/ANXA5/VRK1/DROSHA/RBM25/CAMSAP2/CNOT7/AQR/ELK3/SRRM1/CENPN/EPHA2/SRSF10/SRSF11/RNASEH2A/MCM7/CAD/RFC3/MT1F/SPRY2/XRCC3/MT1X/MSH6/FLNB/SRSF4/PARP2/NASP/AURKA/CCNF/RNF138/SMTN/IMPA1/CDC6/CHAF1A/POLQ/PLK1/EXOSC8/DTL/POLA…
ZWANG_CLASS_3_TRANSIENTLY_INDUCED_BY_EGF	225	-0.575725	-2.03697	1e-10	3.22966e-09	2.07114e-09	5653	tags=47%, list=13%, signal=41%	CEMIP2/JOSD1/DPP4/BHLHE40/ETS1/PER2/PLPP3/BIRC3/RAP2B/ITGA2/FOSB/PFKFB3/IRF2BPL/SNRK/TMEM67/STK38L/KDM6B/GPCPD1/ZBTB38/NFKB1/BCL3/KLF16/TJP2/PANX1/DCUN1D3/TGIF1/NR4A2/IL1B/CCL20/RASA2/SGMS2/PLK2/IL1A/CLDN4/NUMBL/MAFK/ZC3H12A/ADGRF4/CAMSAP1/RND3/PTGS2/KLF13/RIMKLB/PROS1/SOWAHC/GABPB1/ATXN1/CLDN1/ZC3H12C/RAPGEF2/MACC1/IL6/PPP1R15A/NAB1/NFKB2/AFF1/EPHA2/RBMS1/LRATD2/MAFF/ARL5B/BTBD3/CLDND1/PELI1/OTU…
AFFAR_YY1_TARGETS_DN	243	-0.581939	-2.0717	1e-10	3.22966e-09	2.07114e-09	3290	tags=39%, list=8%, signal=36%	AVPR1A/GALR1/TTF1/FEN1/HASPIN/TFAP4/EXO1/BCAT1/HMGCS1/HMMR/DIAPH3/CHTF18/SERPINA1/IFT80/REST/CREB1/MCM7/HLA-A/PCDHB11/UTY/CCNB1/NASP/DKK3/AURKA/CDT1/CDC6/PCDHA11/PLK1/MSH2/FUS/UHRF1/POLA1/KIF2C/MAD2L1/SETD1A/LPAR1/KHDRBS1/SHCBP1/GNB4/NCAPG/MCM3/MCM4/RAD51AP1/CENPH/CXCL6/ITGA4/RFC4/RACGAP1/UNG/STMN1/MCM6/RAB27A/STEAP4/KIF22/FN3K/MXD3/KIF20A/CENPA/CDC25C/TTK/SPAG5/MKI67/SMC2/CCNB2/TACC3/MCM5/CENPF/…
HORIUCHI_WTAP_TARGETS_DN	315	-0.57364	-2.09872	1e-10	3.22966e-09	2.07114e-09	2656	tags=43%, list=6%, signal=41%	B4GALT6/TYMS/NEGR1/VRK1/ENAH/RAB3B/POLD1/ENY2/CDC20/KLHL8/RGS4/ATP8B2/RPRD2/HMMR/GLO1/ST8SIA4/CXADR/HNRNPA3/PHF10/CENPN/OIP5/PBRM1/NRARP/PSRC1/PLP2/MCM7/ARL5B/ZNF618/GLS/CCNB1/AURKA/RRM1/RFC5/APOBEC3B/WWTR1/PLK1/SMAD5/SPC25/UHRF1/POLA1/KIF2C/MAD2L1/SPC24/NUCKS1/ARNTL2/ASF1B/NEK2/LXN/PGK1/DEPDC1/NUF2/GMNN/RRM2/SKA3/FANCD2/PURB/SEPTIN10/TROAP/PBK/LBR/DDX11/ATL3/NCAPG/ING3/TMSB15A/RAD51AP1/PIMREG/SL…
WHITFIELD_CELL_CYCLE_G2_M	201	-0.601115	-2.10809	1e-10	3.22966e-09	2.07114e-09	3911	tags=47%, list=9%, signal=43%	KMT5B/TAB2/CENPE/YWHAH/MZT1/TGIF1/TRIP13/POC1A/THRAP3/ATF7IP/RBM8A/ZMYM1/CTNND1/ATXN1L/ADM5/CKAP5/CFLAR/ODF2/SMARCD1/LPP/ARL6IP1/SPDL1/CDC20/FYN/HMMR/AFDN/HERPUD2/ANP32B/CCNB1/HSPA13/ZFX/AURKA/SMTN/RERE/PLK1/ASXL1/DZIP3/KIF2C/ARHGAP19/NEK2/USP13/DEPDC1/NUF2/CSGALNACT1/SHCBP1/ECT2/PBK/LBR/MCM4/CCSAP/PIMREG/PRR11/AHI1/DEPDC1B/WSB1/GAS2L3/VANGL1/CKAP2/G2E3/INSM1/KIF20B/MIS18BP1/PTPN9/SGO2/CENPA/RCBT…
DAZARD_RESPONSE_TO_UV_NHEK_DN	295	-0.582472	-2.13514	1e-10	3.22966e-09	2.07114e-09	5450	tags=53%, list=13%, signal=47%	MEIS1/ORC2/PCF11/NCOA3/POLE2/PER2/CYTH1/ARID5B/ZHX2/TUBGCP3/N4BP2L2/USP24/PMS1/TMCC1/WDFY3/ZNF451/SPOP/TLK1/MARCHF6/ZMIZ1/CNOT4/VEGFC/CREBBP/TUT4/AUTS2/LSM14A/ICE1/CHD9/DKK1/AKAP9/TLK2/SCAF11/OTUD4/NFKB1/SART3/PHC2/KDM5A/PUM2/POGZ/CEP350/EFNB2/ZNF148/AHR/JARID2/ARID3A/CBFA2T2/SP3/PPP1R12A/ZCCHC14/HMGXB4/EDRF1/CNOT2/MBD2/CERS6/BBX/SLC9A6/CTCF/PHLPP1/RSBN1/AGO2/MYC/FRYL/WDHD1/DIDO1/ENOSF1/BRD8/DMTF…
ZHENG_GLIOBLASTOMA_PLASTICITY_UP	249	-0.596442	-2.13841	1e-10	3.22966e-09	2.07114e-09	3067	tags=43%, list=7%, signal=40%	LYN/FEN1/TRIM2/SYT4/SPRY1/LHFPL2/CPLX2/EXO1/ADGRG6/RND3/POLD1/HIP1/CDC20/RAD51/TLE1/COL4A6/CENPN/SOCS2/FBN2/CLSPN/MT1X/ZFP28/CCNB1/MAPK1IP1L/UGT8/NASP/AURKA/CDT1/CCNF/RRM1/REEP3/FLOT2/PLK1/SPC25/PFKP/UHRF1/POLA1/MAD2L1/CENPQ/MCM2/NUF2/C1orf198/FIGNL1/RRM2/RBL1/SHCBP1/ECT2/NES/IER3/MCM3/MCM4/RAD51AP1/RBP1/FZD6/POLE/UBE2T/VWA1/TRIB2/PTPRD/RFC4/RACGAP1/INCENP/PCLAF/PDPN/ACSL3/MCM6/KIF22/CDC45/MIS18B…
DACOSTA_UV_RESPONSE_VIA_ERCC3_COMMON_DN	457	-0.567393	-2.13919	1e-10	3.22966e-09	2.07114e-09	5442	tags=48%, list=13%, signal=43%	ABI1/PAIP1/ORC2/BHLHE40/TCF7L2/ZFYVE9/NCOA3/ITSN2/PPP2R5E/ARID5B/PRR3/TAF4/ZHX2/CDC27/TUBGCP3/ATAD2B/USP24/PMS1/FOXD1/STRN3/MARF1/HIVEP1/SOCS5/SPOP/TLK1/MARCHF6/ZMIZ1/WRN/C2CD2/CNOT4/VEGFC/RCOR1/CREBBP/TUT4/CHD9/ADAM10/ZMYND11/RB1/SETD2/MYO1B/ACVR1/AKAP9/TLK2/DPYD/YAP1/FAM171A1/TAB2/TRIM33/CENPE/OPA1/NUMB/MBNL1/MED13/TJP2/CDK17/KDM5A/UVRAG/STAM/STAU2/PUM2/SNX13/MAMLD1/MTF2/TBL1X/CEP350/NBN/ZNF148…
MARKEY_RB1_ACUTE_LOF_UP	234	-0.61654	-2.17854	1e-10	3.22966e-09	2.07114e-09	3023	tags=50%, list=7%, signal=47%	E2F8/HDAC2/PRIM1/TNRC6A/MRE11/H2AZ1/SRSF2/NIPBL/TYMS/HMGN2/RFC1/SET/HMGN1/SPDL1/FUBP1/CHAF1B/RAD51/CDCA7L/PDIA3/PARP1/HAUS3/MCM7/ANP32B/BRCA2/SMC3/RAD21/CCNB1/KPNA2/NASP/AURKA/CDT1/CCNF/BRCA1/PSIP1/CDC6/XPO1/RFC5/WWTR1/PLK1/DTL/POLA1/KIF2C/ILF3/MAD2L1/DNAJC9/NUCKS1/ASF1B/NEK2/GMNN/SASS6/FIGNL1/RRM2/CASP8AP2/RBL1/ECT2/TOPBP1/MCM3/MCM4/RAD51AP1/CIP2A/RBMX/PIMREG/H2AZ2/TRIM59/UBE2T/CBX5/CENPK/CKAP2/…
RUIZ_TNC_TARGETS_DN	143	-0.652943	-2.18701	1e-10	3.22966e-09	2.07114e-09	3392	tags=53%, list=8%, signal=49%	TRIP13/STC2/SLC38A1/E2F8/PRIM1/FEN1/EXO1/ZWILCH/TYMS/LYPD1/SPDL1/CCNE2/EGFR/CAV2/OIP5/ORC1/MET/MCM7/MT1X/GINS3/MYBL1/CDC6/SPC25/EXOSC8/PFKP/DTL/KIF2C/MAD2L1/GINS1/DNAJC9/ASF1B/CRIM1/MCM2/TPM1/GMNN/BLM/RRM2/FAM111A/MCM10/SHCBP1/PBK/FANCI/MYOF/MCM3/MCM4/RAD51AP1/SERPINB2/PTPRF/RFC4/ATAD2/MCM6/CDC45/RAD54L/DMD/CENPU/DIO2/H2AX/ZWINT/USP1/MCM5/CDK1/NCAPG2/BIRC5/MELK/FOXM1/RAD54B/MEST/CXCL8/CD24/BARD1/…
TOYOTA_TARGETS_OF_MIR34B_AND_MIR34C	452	-0.583063	-2.19726	1e-10	3.22966e-09	2.07114e-09	5286	tags=50%, list=12%, signal=44%	CEP72/DHX9/TAGLN2/IQCC/ITFG2/TUBGCP3/RAB31/VPS54/MIR100HG/KAT7/METTL9/SHPRH/ZNF623/UTP23/GOLM1/THAP12/POMK/KIAA2026/MYB/ZNF493/DENND5B/PKMYT1/CDC25A/DBF4B/LIG1/C2CD2/ZNF639/MLLT1/STK38L/FAM215B/LUC7L/ARL17A/BRI3BP/SETD2/UBE2S/FAM171A1/KMT5B/HDAC8/ZNF91/TRIM33/ZNF273/CENPE/GTF2I/SMPD4/FAR1/SCAF4/ZC3H13/NEDD1/ARHGAP32/CRTC3/HELLS/ZNF551/TRIP13/POGK/RIC8B/CDON/CCDC9/SYNE2/CASKIN2/DCLRE1C/SUV39H1/FEN…
SARRIO_EPITHELIAL_MESENCHYMAL_TRANSITION_UP	181	-0.645501	-2.22754	1e-10	3.22966e-09	2.07114e-09	2757	tags=56%, list=6%, signal=52%	CYP2A13/PKMYT1/PLEK2/VEGFC/ESPL1/UBE2S/CENPE/YWHAH/TNK1/EIF5A2/HELLS/YEATS4/CENPW/EXO1/FBXO41/HILPDA/TYMS/RECQL4/SH3KBP1/HMMR/RAD51/IGFBP3/FABP5/DCK/OIP5/MFHAS1/MCM7/RFC3/CCNB1/ENC1/MYBL1/BRCA1/SMTN/CDC6/ENO1/MMP14/RFC5/PHF19/PLK1/MSH2/FBXO5/UHRF1/DTL/POLD3/MAD2L1/ASF1B/PGK1/MCM2/GMNN/BLM/RRM2/SKA3/CDC7/RBL1/ECT2/FGF2/PLAUR/MCM3/MCM4/CDCA7/SERPINB2/UBE2T/RFC4/STMN1/ETV1/MCM6/CDCA5/CDC45/NDC80/KIF…
MITSIADES_RESPONSE_TO_APLIDIN_DN	249	-0.623358	-2.23491	1e-10	3.22966e-09	2.07114e-09	3910	tags=47%, list=9%, signal=43%	MTMR4/CALM3/ZNF22/MBNL1/IMPA2/KAT2B/TBL1X/HELLS/TRIP13/ZFP64/SLC38A1/SF3B1/CDC42BPA/MYC/PRPF8/CAMSAP1/TRRAP/TYMS/CASP6/ATXN1/DROSHA/SPEN/WDR76/EIF2AK2/MFHAS1/DENND1B/PARP1/AGPAT5/CAD/SMC3/JPT2/MSH6/CCNB1/HNRNPD/AURKA/CDT1/CBFB/RRM1/ADD3/CHAF1A/RBBP6/MSH2/FBXO5/FANCG/POLD3/GINS1/ARHGAP19/NUCKS1/NEK2/MCM2/BLM/RRM2/SYK/WEE1/CDC7/SHCBP1/ECT2/SLK/LBR/FANCI/TOPBP1/NCAPG/MCM4/SLC5A3/PIK3CB/CBX5/SLC38A2/…
REACTOME_MITOTIC_SPINDLE_CHECKPOINT	109	-0.696175	-2.24395	1e-10	3.22966e-09	2.07114e-09	4144	tags=52%, list=10%, signal=47%	CENPM/DYNC1LI2/CENPE/CENPL/NUP85/MIS12/B9D2/NUP37/SKA2/CKAP5/CLASP1/ZWILCH/NUP160/ZW10/TAOK1/SPDL1/PPP2R5B/CDC20/CENPC/CDC23/ITGB3BP/CENPN/UBE2D1/CENPO/XPO1/PLK1/SPC25/KIF2C/MAD2L1/SPC24/CENPQ/DSN1/NUF2/CENPH/CENPK/INCENP/CENPI/NUP107/SGO2/SGO1/ERCC6L/NDC80/CENPA/CENPU/KNL1/NDE1/ZWINT/KNTC1/CDCA8/CENPF/BIRC5/BUB1/SKA1/KIF18A/UBE2C/AURKB/BUB1B
WINNEPENNINCKX_MELANOMA_METASTASIS_UP	161	-0.661108	-2.25739	1e-10	3.22966e-09	2.07114e-09	3687	tags=55%, list=8%, signal=51%	OGG1/GINS2/CDKN3/PRIM2/NEIL3/CDON/SKA2/EXO1/CLASP1/TYMS/DCBLD2/C8orf33/ENY2/TAF1A/PARPBP/PHF14/NUDT4/CHTOP/CENPN/SRSF10/MSH6/CCNB1/PSMC3IP/KPNA2/PCDH17/NASP/AURKA/CDC6/XPO1/RFC5/FERMT2/SPC25/UHRF1/KIF2C/NEK2/NUF2/GMNN/RRM2/PLEKHG2/SHCBP1/ECT2/NCAPG/MCM4/RBMX/H2AZ2/UBE2T/RFC4/RACGAP1/PCLAF/ATAD2/MCM6/CDCA5/NCAPH/CDC45/RAD54L/SGO2/NDC80/CENPA/ZNF367/CEP55/CKS1B/SPAG5/ZWINT/KNTC1/SMC2/CDCA8/CCNB2/CE…
ELVIDGE_HIF1A_TARGETS_DN	92	-0.716007	-2.2586	1e-10	3.22966e-09	2.07114e-09	3571	tags=65%, list=8%, signal=60%	IGFBP5/PFKFB3/SH2B2/FAM162A/VEGFC/HK2/P4HA2/ANGPTL4/AHNAK2/LOXL2/RRAGD/S100A4/HILPDA/ATXN1/ANKZF1/FYN/GYS1/EGFR/IGFBP3/LOXL1/STC1/ISG20/MAFF/GBE1/CA9/ANG/PLIN2/YEATS2/NOL3/CAVIN1/PDGFB/PGAP1/PGK1/ZNF292/PGM1/WSB1/MAGED4B/RNASE4/PAM/SPAG4/SLC2A1/FAM13A/ALDOC/CSRP2/P4HA1/CAV1/OBSL1/OLFML2A/TMEM45A/GJA1/ENO2/EGLN3/ERO1A/PDK1/PPFIA4/DSC2/EGLN1/NDRG1/LOX/ZNF395
VERNELL_RETINOBLASTOMA_PATHWAY_UP	70	-0.75404	-2.26844	1e-10	3.22966e-09	2.07114e-09	3072	tags=70%, list=7%, signal=65%	MCMBP/FEN1/VRK1/RECQL4/HAUS1/CDCA7L/DCK/SPIN4/MCM7/RFC3/CLSPN/FANCA/FANCL/PBX3/SUZ12/RRM1/CHAF1A/E2F2/FBXO5/HUNK/POLD3/ASF1B/NPAT/BLM/ESCO2/RRM2/FAM111A/EGR1/MCM4/RAD51AP1/MCM8/EZH2/CENPK/RFC4/ATAD2/RAB27A/CDCA5/KLHL42/FAM161A/ZNF367/TCF19/MELK/BARD1/DEK/CDCA4/TMPO/HMGB2/PTX3/SKP2
SHEPARD_BMYB_TARGETS	76	-0.741311	-2.27227	1e-10	3.22966e-09	2.07114e-09	3188	tags=55%, list=7%, signal=51%	PPP1R3G/RTKN/C17orf49/SOX21/NR2F1/SFRP1/CDC20/PARPBP/HEY1/CCNB1/NUMA1/SOX11/FBXO5/ASCL1/MDK/GPSM1/PRR11/CKAP2/PCDH18/MASTL/CDCA2/UCP2/NDE1/TTK/MKI67/KIF14/TACC3/CDK1/DDX17/BIRC5/MELK/FOXM1/ANLN/TK1/CDCA3/DLGAP5/TPX2/PRC1/GTSE1/AURKB/ASPM/KIF11
SHEDDEN_LUNG_CANCER_POOR_SURVIVAL_A6	457	-0.6041	-2.27759	1e-10	3.22966e-09	2.07114e-09	4182	tags=48%, list=10%, signal=44%	GPR37/MYO7A/CENPM/RASAL2/UBE2S/DBF4/SYNCRIP/MIF/CALM3/CNOT9/HK2/CENPE/GINS2/RIPK2/CDKN3/ITCH/MTF2/HELLS/NBN/PITX1/TRIP13/PRIM2/STC2/PNKP/SNX7/NEIL3/SLC16A1/YEATS4/SLC38A1/SNRPA1/SAP30/SLC16A3/E2F8/HDAC2/PRIM1/WDHD1/NUP37/UBA6/EXO1/ARL4D/PHTF2/H2AZ1/CCDC93/ZWILCH/TYMS/CARHSP1/ARTN/DARS1/RIF1/IMPAD1/GABPB1/FGFR1OP/RECQL4/CDC20/PARPBP/CCNE2/HMMR/PHF10/CENPN/NAB1/UBE2D1/STC1/SEC23A/DCK/OIP5/WDR76/ORC…
GAVIN_FOXP3_TARGETS_CLUSTER_P6	90	-0.730595	-2.28186	1e-10	3.22966e-09	2.07114e-09	2610	tags=56%, list=6%, signal=52%	TYMS/LGALS3/TPI1/CDC20/HMMR/RAD51/MMS22L/CLSPN/CCNB1/AURKA/NEDD4/IGF2BP3/PLK1/SPC25/KIF2C/SPC24/NEK2/NUF2/FIGNL1/RRM2/MCM10/KSR1/MTMR7/PBK/NCAPG/CENPK/PCLAF/CDCA5/AR/RAD54L/KIF20A/CEP55/CKS1B/SPAG5/CDCA8/CCNB2/CENPF/CDK1/NCAPG2/BIRC5/BUB1/TK1/CDCA3/TPX2/CCNA2/NUSAP1/AURKB/BUB1B/ASPM/SLC39A4
REACTOME_RESOLUTION_OF_SISTER_CHROMATID_COHESION	125	-0.695454	-2.29734	1e-10	3.22966e-09	2.07114e-09	4144	tags=56%, list=10%, signal=51%	CENPM/DYNC1LI2/HDAC8/CENPE/CENPL/NUP85/MIS12/B9D2/STAG2/NUP37/SKA2/CKAP5/TUBB2B/TUBA1C/CLASP1/ZWILCH/NUP160/ZW10/TAOK1/SPDL1/PPP2R5B/CDC20/CENPC/ITGB3BP/CENPN/WAPL/TUBB1/SMC3/RAD21/CENPO/CCNB1/XPO1/PLK1/SPC25/KIF2C/MAD2L1/SPC24/STAG1/CENPQ/DSN1/NUF2/CENPH/CENPK/INCENP/PDS5B/CENPI/CDCA5/NUP107/SGO2/SGO1/ERCC6L/NDC80/CENPA/CENPU/KNL1/TUBA1A/NDE1/ZWINT/KNTC1/CDCA8/CCNB2/CENPF/CDK1/BIRC5/BUB1/SKA1/KI…
MORI_LARGE_PRE_BII_LYMPHOCYTE_UP	88	-0.735557	-2.30248	1e-10	3.22966e-09	2.07114e-09	4038	tags=66%, list=9%, signal=60%	ZNF358/UBE2S/CENPE/CENPL/CDKN3/E2F8/H2AZ1/HMGN2/SMARCC1/CDC20/FANCC/HAUS3/MCM7/RAD21/CCNB1/KPNA2/ENPEP/AURKA/RRM1/CDKN2C/DTL/NUCKS1/ASF1B/MCM2/RRM2/MCM3/CDCA7/H2AZ2/MYBL2/RACGAP1/STMN1/MCM6/CDCA5/KIF22/NCAPH/SMC4/NDC80/CENPA/TUBA1A/CKS1B/TTK/H2AX/MKI67/SMC2/CCNB2/CDK1/MELK/LMNB1/CDCA3/ANP32E/CCNA2/TMPO/CBX1/PRC1/TOP2A/HJURP/TUBB/HMGB1
SHEPARD_CRUSH_AND_BURN_MUTANT_DN	184	-0.666634	-2.30368	1e-10	3.22966e-09	2.07114e-09	4262	tags=49%, list=10%, signal=44%	FAM13B/GUCA1A/TNXB/AKAP9/SYNCRIP/TRIM39/HLX/PRIM2/NEIL3/PPP1R3G/MBD2/RTKN/C17orf49/HDAC2/SOX21/NR2F1/RLF/ZNF511/SFRP1/PUM1/FUBP1/CDC20/BORA/PARPBP/ARNT2/HEY1/OIP5/PHF3/CEP250/ANP32B/SKI/MYCL/CCNB1/MTUS1/NUMA1/SMTN/ZNF184/CTDSPL2/SOX11/FBXO5/ASCL1/KIF2C/TMEM263/MDK/KHDRBS1/SHCBP1/ECT2/CEP295/GPSM1/PRR11/PTEN/CKAP2/RACGAP1/PCDH18/LMNB2/MASTL/INSM1/CDCA2/UCP2/DIO2/CEP55/NDE1/TTK/MKI67/KDM6A/KIF14/CC…
LI_WILMS_TUMOR_VS_FETAL_KIDNEY_1_DN	163	-0.672457	-2.30402	1e-10	3.22966e-09	2.07114e-09	3541	tags=56%, list=8%, signal=51%	CDKN3/TRIP13/PRIM2/XRCC5/PCBP2/SLC16A1/SNRPA1/PRIM1/FEN1/SV2A/BTAF1/YWHAZ/CKAP5/H2AZ1/PRRC2B/LRP4/BCL7A/CDC20/BAZ1B/ST6GAL1/SCRN1/SIX1/CRABP2/PARP1/RNASEH2A/TP53BP2/PBX3/MSH6/KPNA2/NASP/AURKA/RRM1/BRCA1/SALL2/RFC5/APOBEC3B/CHAF1A/EYA1/MPHOSPH9/MSH2/PFKP/ANKLE2/RSRC2/KIF2C/MAD2L1/DNAJC9/MCM2/BLM/ABCA2/FANCI/TOPBP1/TMSB15A/EZH2/CBX5/PCLAF/CACNB3/UNG/STMN1/MCM6/COL2A1/SMC4/BAZ1A/CDC25C/CKS1B/TTK/TIA…
FERREIRA_EWINGS_SARCOMA_UNSTABLE_VS_STABLE_UP	159	-0.676601	-2.30571	1e-10	3.22966e-09	2.07114e-09	4133	tags=51%, list=10%, signal=46%	ESPL1/DBF4/SYNCRIP/CENPE/CDKN3/FANCM/PROSER1/RGS1/RIC8B/SNRPA1/SAP30/FEN1/WDHD1/SLCO5A1/ODF2/H2AZ1/HMGN2/CEP83/PARPBP/TGFB3/CHTF18/MCM3AP/RBM17/XRCC3/STX1A/MGAT4C/CCNB1/KPNA2/CLCN5/BRCA1/PSIP1/CDC6/CHAF1A/POLQ/SPC25/C4orf3/KIF2C/GMNN/BLM/FANCD2/PPP4R3A/NCAPG/UBE2T/ATAD5/CENPK/CKAP2/PCLAF/ATAD2/PCDHB5/NCAPH/SGO2/PAG1/ZNF532/NDC80/CENPU/KNL1/CEP55/ZWINT/KNTC1/NCAPD2/SMC2/BRIP1/CENPF/NCAPG2/CHEK1/ME…
VANTVEER_BREAST_CANCER_METASTASIS_DN	131	-0.697985	-2.31344	1e-10	3.22966e-09	2.07114e-09	3181	tags=55%, list=7%, signal=51%	RRAGD/CDC42BPA/AGO2/NIPA1/ADGRG6/CCNE2/DIAPH3/CENPN/DCK/INAVA/INTS7/GBE1/RAD21/STX1A/CA9/TMEM65/QSER1/EXT1/AURKA/SPC25/PFKP/FBXO5/DTL/MAD2L1/GPR180/PGK1/DEPDC1/C1orf198/RRM2/SKA3/ECT2/CDCA7/LRP12/CCSAP/PIMREG/VEGFA/EZH2/RFC4/STMN1/ATAD2/MCM6/NMB/NDUFA4L2/GGH/SLC2A3/SMC4/NDC80/CENPA/ZNF367/CENPU/CTSV/COL4A2/IVNS1ABP/KIF14/CCNB2/CENPF/GPSM2/BIRC5/BUB1/MELK/TK1/CP/DLGAP5/PRC1/MAPRE2/NUSAP1/TMEM45A/T…
BIDUS_METASTASIS_UP	216	-0.654187	-2.31473	1e-10	3.22966e-09	2.07114e-09	4840	tags=54%, list=11%, signal=48%	EIF1/NF1/STRN3/KNSTRN/SMC1A/RHBDL3/RCOR1/ARPP19/WBP11/MLLT10/DBF4/TLK2/SSRP1/EFHC1/CCDC15/IFT81/PCBP1/CEBPG/WAC/HMGXB4/PAK2/SGMS2/FEN1/WDHD1/CRKL/CKAP5/HNRNPDL/H2AZ1/HNRNPA2B1/SRSF2/TYMS/TRA2B/BCL7A/SRSF12/RLIM/CBLL1/CDC23/PATL1/NONO/PHF10/HNRNPK/CENPN/SEC23A/CREB5/AZI2/KLHL23/MARCKS/MED14/SRSF1/FSD1L/CCNB1/HNRNPD/CEP57/AURKA/CCNY/CBFB/RRM1/RNF138/CDC6/NFIB/BPTF/RFC5/MPHOSPH9/NRAS/HNRNPU/MAD2L1/S…
KAUFFMANN_MELANOMA_RELAPSE_UP	61	-0.783376	-2.32072	1e-10	3.22966e-09	2.07114e-09	3916	tags=69%, list=9%, signal=63%	DCLRE1A/PMS2P3/OGG1/GTF2H3/GINS2/XRCC5/NEIL3/EXO1/RAD51/MCM7/TDP1/FANCA/MSH6/BRCA1/CDC6/RFC5/CHAF1A/POLQ/MSH2/FANCG/XRCC2/MAD2L1/EME1/GMNN/BLM/RRM2/FANCD2/MCM3/MCM4/RAD51AP1/RFC4/MCM6/CDC45/RAD54L/SMC4/SMC2/BRIP1/CENPF/CHEK1/PTTG1/DEK/TOP2A
GRAHAM_CML_DIVIDING_VS_NORMAL_QUIESCENT_UP	181	-0.67375	-2.32503	1e-10	3.22966e-09	2.07114e-09	4144	tags=54%, list=10%, signal=49%	CENPM/ESPL1/UBE2S/SYNCRIP/GINS2/NUP85/CDKN3/SORD/TRIP13/XIST/E2F8/FEN1/HSPA14/TYMS/PROS1/VRK1/CDC20/CCNE2/HMMR/RAD51/ITGB3BP/NUDT4/FABP5/OIP5/RNASEH2A/RFC3/KLHL7/CCNB1/KPNA2/AURKA/RRM1/BRCA1/CDC6/APOBEC3B/SPC25/FBXO5/KIF2C/MAD2L1/GINS1/ARHGAP19/NEK2/MCM2/TPM1/GMNN/RRM2/MCM10/CDC7/PDLIM1/ECT2/PBK/FANCI/NCAPG/MCM4/RAD51AP1/SERPINB2/EZH2/RFC4/RACGAP1/PCLAF/STMN1/GGH/CDC45/NDC80/KIF20A/CENPA/CENPU/CE…
SONG_TARGETS_OF_IE86_CMV_PROTEIN	55	-0.795372	-2.32577	1e-10	3.22966e-09	2.07114e-09	2610	tags=62%, list=6%, signal=58%	TYMS/PPIH/DCK/MCM7/RFC3/NASP/CDT1/RRM1/MSH2/POLD3/POLA1/MAD2L1/DNAJC9/MCM2/BLM/TOPBP1/MCM3/EZH2/MYBL2/PCLAF/UNG/MCM6/RAB27A/H2AX/ZWINT/MCM5/CDK1/FOXM1/TK1/PTTG1/TPX2/BARD1/HMGB2/KIF11
NAKAYAMA_SOFT_TISSUE_TUMORS_PCA2_UP	89	-0.743377	-2.33766	1e-10	3.22966e-09	2.07114e-09	4133	tags=65%, list=10%, signal=59%	ESPL1/UBE2S/CENPE/CDKN3/TBL1X/NRP2/PITX1/AHNAK2/SLC16A3/FOXF2/SV2A/TNC/CDC20/FGF9/HMMR/CENPN/FZD1/FBN2/PLP2/CCNB1/TRPS1/KIF2C/TPBG/NEK2/RRM2/PBK/MCM4/INHBA/PCLAF/CCN4/NCAPH/COL2A1/KIF20A/CENPA/CEP55/COL11A1/MKI67/CDCA8/CCNB2/CENPF/GPSM2/CDK1/BIRC5/BUB1/MELK/FGFR3/DLGAP5/CDH3/TPX2/CCNA2/UBE2C/NUSAP1/ENO2/GTSE1/TOP2A/HJURP/ASPM/KIF11
SOTIRIOU_BREAST_CANCER_GRADE_1_VS_3_UP	153	-0.691028	-2.33981	1e-10	3.22966e-09	2.07114e-09	3023	tags=63%, list=7%, signal=59%	E2F8/FEN1/TUBA1C/EXO1/H2AZ1/VRK1/CDC20/PARPBP/CCNE2/HMMR/RAD51/CENPN/OIP5/RNASEH2A/MIS18A/CCNB1/KPNA2/AURKA/APOBEC3B/POLQ/PLK1/FBXO5/KIF2C/MAD2L1/GINS1/DNAJC9/NEK2/DSN1/MCM2/BLM/RRM2/MCM10/TROAP/ECT2/NCAPG/MCM3/MCM4/PIMREG/H2AZ2/EZH2/MYBL2/RFC4/RACGAP1/STMN1/MCM6/CENPI/NCAPH/CDC45/NDC80/KIF20A/CENPA/CENPU/TUBA1A/CEP55/TTK/SPAG5/ZWINT/MKI67/CDCA8/KIF14/CCNB2/TACC3/CENPF/TIMELESS/STIL/CDK1/NCAPG2/C…
MANALO_HYPOXIA_UP	205	-0.665904	-2.34076	1e-10	3.22966e-09	2.07114e-09	4412	tags=49%, list=10%, signal=44%	INHBE/COL9A1/VEGFC/TCIM/HLA-E/NFATC4/FAM171A1/GLCE/USP47/B3GALT4/BACE2/P4HA2/LAMB1/ANGPTL4/PPARG/ALPK3/GRK5/STC2/CLIP2/LOXL2/PTPRR/CDK19/NUAK1/SLCO5A1/FNDC3B/ATXN1/MARCHF3/COL5A1/IGFBP3/TLE1/NPAS2/ZBTB1/STC1/DLGAP4/COL1A2/RHOBTB1/MAFF/GBE1/FER1L4/GLS/DKK3/ABCA1/CD200/AFAP1/MMP2/EDN1/TNFAIP3/CHSY1/PDGFB/WASF2/ZNF292/TPM1/HIF3A/IER3/FILIP1L/ENPP1/VEGFA/PGF/SLC6A8/PGM1/NARF/INHBA/TRIB2/PTPRF/PLOD1/R…
PUJANA_BRCA_CENTERED_NETWORK	117	-0.71987	-2.34476	1e-10	3.22966e-09	2.07114e-09	2338	tags=56%, list=5%, signal=54%	ESPL1/RB1/MAT2A/CNOT9/SNRPA1/DDX39B/MRE11/CDC20/HMMR/NFYB/NAE1/RECQL/SRSF11/CAD/RFC3/DNMT1/BRCA2/SMC3/RAD21/NASP/SUZ12/AURKA/RRM1/BRCA1/PSIP1/XPO1/DNA2/CHAF1A/ATM/MSH2/POLA1/MAD2L1/GINS1/TCF3/MCM2/BLM/CDC7/LBR/FANCI/TOPBP1/MCM4/RAD51AP1/POLE/H2AZ2/EZH2/MYBL2/RFC4/UNG/MCM6/RAD54L/SMC4/NDC80/NCAPD2/SMC2/MCM5/TIMELESS/CDK1/LMNB1/CCNA2/DEK/TMPO/UBE2C/HMGB2/TOP2A/SKP2/KIFC1
GREENBAUM_E2A_TARGETS_UP	31	-0.885643	-2.34575	1e-10	3.22966e-09	2.07114e-09	1609	tags=74%, list=4%, signal=71%	CCNB1/AURKA/CDKN2C/PFKP/KIF2C/PGK1/ECT2/CIP2A/SCIN/RACGAP1/SLC12A2/TTK/H2AX/MKI67/CCNB2/BUB1/PLK4/ANLN/KIF4A/CCNA2/NUSAP1/TOP2A/KIF11
PYEON_HPV_POSITIVE_TUMORS_UP	97	-0.737391	-2.35093	1e-10	3.22966e-09	2.07114e-09	4763	tags=64%, list=11%, signal=57%	ZNF789/MYB/LIG1/LINC00342/SLC35E2A/SCAI/PDIK1L/HELLS/PRDM15/LY75/TASOR/TYMS/RMI2/CCHCR1/FUBP1/CFAP44/WDR76/CDK3/INTS7/FANCL/MAP7D2/SYCP2/TRIM56/AHSA2P/NASP/PSIP1/SLF1/C5orf34/MPHOSPH9/SLF2/HNRNPU/CDKN2C/UHRF1/DTL/CDC7/CASP8AP2/GEN1/NEMP1/MCM3/CDCA7/MCM8/EZH2/PNISR/CENPK/ATAD2/SLFN13/CDKN2A/C18orf54/ZNF367/TIA1/KNTC1/USP1/CEP78/CENPF/ZMAT1/E2F7/CENPJ/KIF15/BARD1/KIAA1841/RTKN2/NEURL1B
ODONNELL_TFRC_TARGETS_DN	134	-0.715925	-2.37249	1e-10	3.22966e-09	2.07114e-09	4042	tags=56%, list=9%, signal=51%	TBC1D8-AS1/DBF4/ZFAND4/CENPE/NPNT/NRTN/CDKN3/HELLS/TADA2A/TNRC6A/FAM72C/RIF1/NFIA/CDC20/HMMR/DIAPH3/TMEM107/BRCA2/CCNB1/GINS3/AURKA/CDC6/DNA2/BPTF/CHAF1A/PLK1/SPC25/FUS/FBXO5/ACVR2B/DEPDC1/RRM2/FANCD2/SHCBP1/ECT2/DEPDC1B/MYBL2/NCAPH/C4orf46/FAM83D/SGO2/ERCC6L/MEX3C/NDC80/KIF20A/CENPA/CEP55/CKS1B/TTK/MKI67/KIF14/TACC3/CENPF/CDK1/BIRC5/BUB1/PLK4/FOXM1/ANLN/RAD54B/KIF4A/DLGAP5/CCNA2/CKAP2L/PRC1/ARHG…
REACTOME_MITOTIC_PROMETAPHASE	202	-0.675886	-2.37491	1e-10	3.22966e-09	2.07114e-09	4188	tags=53%, list=10%, signal=49%	CEP63/CENPM/DYNC1LI2/AKAP9/HDAC8/CENPE/CENPL/NUP85/NEDD1/HAUS2/MZT1/MIS12/B9D2/STAG2/NUP37/SKA2/CKAP5/TUBB2B/ODF2/TUBA1C/CLASP1/ZWILCH/NUP160/ZW10/CEP164/TAOK1/FGFR1OP/PCNT/SPDL1/PPP2R5B/CDC20/CENPC/HAUS1/ITGB3BP/CCP110/CDK5RAP2/HAUS6/CENPN/WAPL/SFI1/CEP41/CEP250/HAUS3/TUBB1/SMC3/RAD21/CENPO/CCNB1/CEP57/NUMA1/XPO1/HAUS8/PLK1/SPC25/KIF2C/MAD2L1/SPC24/STAG1/CENPQ/NEK2/DSN1/NUF2/PCM1/NEK6/CEP192/NCA…
SENGUPTA_NASOPHARYNGEAL_CARCINOMA_UP	299	-0.65241	-2.38866	1e-10	3.22966e-09	2.07114e-09	4750	tags=59%, list=11%, signal=53%	HIVEP1/CCL2/SOCS5/ANGPT2/SMC1A/PMAIP1/ZNF267/GORAB/TDG/AKT3/VEZT/DBF4/SCAI/ADH5/ZNF121/CENPE/ANKRD22/NPNT/EIF5A2/SYNPO2/NEDD1/ZNF431/ERI1/CD274/NID1/MTF2/LAMB1/HELLS/EFNB2/NBN/SLC25A40/FBN1/ZNF286A/CKAP4/MCMBP/AGO2/ZNF180/ATP11C/U2SURP/ZNF92/WDHD1/COL27A1/SLCO5A1/PIWIL4/HNRNPA2B1/B4GALT6/CLASP1/PTGS2/TYMS/ATL2/RIF1/PARPBP/CCNE2/PATL1/ARNT2/NUP58/DIAPH3/COL5A1/NFYB/MBTD1/OSBPL1A/HAUS6/ROBO1/VASH2/…
CHIANG_LIVER_CANCER_SUBCLASS_PROLIFERATION_UP	175	-0.695931	-2.39187	1e-10	3.22966e-09	2.07114e-09	3593	tags=61%, list=8%, signal=56%	BACE2/CDKN3/LAMB1/HELLS/ARID3A/TRIP13/CMTM3/SLC38A1/CKAP4/SLC16A3/SOX9/E2F8/HDAC2/FEN1/LHFPL2/BCAT1/SALL4/RMI2/ELF4/MARCHF3/CDC20/CDCA7L/OIP5/MARCKS/PLP2/PTP4A3/CCNB1/TMEM65/AURKA/CDC6/PKDCC/PELI1/SALL2/IGF2BP3/FBXO5/DTL/KIF2C/MAD2L1/NEK2/DEPDC1/MCM2/NUF2/SASS6/PKM/CDC7/SHCBP1/ECT2/PBK/FANCI/PDE9A/PM20D2/RAD51AP1/CDCA7/PRR11/EZH2/DBN1/DEPDC1B/WSB1/CENPK/RFC4/RACGAP1/CDCA5/SGO2/PAG1/PLBD1/ZNF532/S…
PUJANA_BRCA2_PCC_NETWORK	422	-0.642947	-2.41105	1e-10	3.22966e-09	2.07114e-09	4581	tags=51%, list=11%, signal=46%	SMC1A/MYB/FNBP4/LCT/CNOT3/ACYP1/LIG1/WRN/ZNF253/KDM1A/ESPL1/RB1/RAG1/UBE2S/DBF4/TLK2/SSRP1/MAT2A/CNOT9/ZNF273/CENPE/SIVA1/LIG3/SMPD4/UBE2I/STAU2/PNN/CDKN3/EXOSC9/MTF2/PRPF4B/XRCC5/SNRPA1/DHX15/HMGXB4/NUDT21/PAK2/TTF1/CTCF/PRIM1/STAG2/FEN1/WDHD1/DDX39B/BTAF1/CKAP5/MRE11/HMGCS1/TRRAP/TYMS/CASP6/RIF1/DCBLD2/POLD1/HMGN1/ZNF101/FUBP1/LARP7/CDC20/CENPC/CCNE2/CDC23/HMMR/ITGB3BP/PAXIP1/GNA15/NFYB/ZBTB39/…
KANG_DOXORUBICIN_RESISTANCE_UP	54	-0.826772	-2.41883	1e-10	3.22966e-09	2.07114e-09	2746	tags=85%, list=6%, signal=80%	POLA2/TYMS/CDC20/HMMR/OIP5/AURKA/RRM1/CDC6/POLQ/PLK1/MAD2L1/GINS1/ASF1B/RRM2/PBK/FANCI/NEMP1/NCAPG/MCM4/RAD51AP1/RFC4/PCLAF/ATAD2/CENPA/ZWINT/MKI67/CDCA8/CDK1/NCAPG2/BIRC5/BUB1/PLK4/FOXM1/LMNB1/TK1/KIF4A/TPX2/BARD1/HMGB2/PRC1/NUSAP1/TOP2A/HJURP/NSD2/BUB1B/ASPM
BURTON_ADIPOGENESIS_3	93	-0.763411	-2.42443	1e-10	3.22966e-09	2.07114e-09	3023	tags=73%, list=7%, signal=68%	E2F8/PRIM1/FEN1/TYMS/CDC20/CCNE2/RAD51/OSMR/DCK/DNMT1/BZW1/CCNB1/KPNA2/NASP/AURKA/CCNF/ABCA1/RRM1/BRCA1/CDC6/RFC5/PLK1/DTL/POLA1/KIF2C/ASF1B/MCM2/FIGNL1/RRM2/MCM10/CDC7/TOPBP1/MCM3/MCM4/RAD51AP1/CDCA7/EZH2/CENPK/RACGAP1/INCENP/PCLAF/LMO4/KIF22/NCAPH/CDC45/KLF5/KIF20A/TCF19/TTK/MKI67/SMC2/CDCA8/CCNB2/TACC3/USP1/MCM5/CDK1/BIRC5/BUB1/TK1/KIF4A/DLGAP5/HMGB2/PRC1/NUSAP1/TOP2A/VCAN/KIF11
MISSIAGLIA_REGULATED_BY_METHYLATION_DN	122	-0.740863	-2.42913	1e-10	3.22966e-09	2.07114e-09	4417	tags=66%, list=10%, signal=60%	SMC1A/LIG1/HNRNPA1/ITGB4/CENPM/ESPL1/DCLRE1A/CENPE/MDFI/CDKN3/PCBP2/PRIM1/ENOSF1/H2AZ1/TYMS/HMGN2/SNRNP40/HDHD5/ARL6IP1/LANCL1/ZNF175/HNRNPL/RNASEH2A/CAD/DNMT1/ANP32B/MSH6/NCAPD3/NRGN/AURKA/CDT1/AARS1/RRM1/PSIP1/CDC6/RFC5/CDKN2C/EXOSC8/POLD3/ILF3/ARHGAP19/NEK2/GMNN/LBR/RBMX/H2AZ2/EZH2/RFC4/PCLAF/STMN1/KIF22/NCAPH/CDC45/SMC4/CDC25C/ZWINT/KNTC1/MKI67/SMC2/KIF14/PCDH7/MCM5/CENPF/CDK1/CHEK1/FOXM1/LMN…
ISHIDA_E2F_TARGETS	51	-0.841212	-2.43371	1e-10	3.22966e-09	2.07114e-09	4639	tags=86%, list=11%, signal=77%	ANXA8L1/LIG1/RB1/DBF4/TRIP13/E2F8/PRIM1/FEN1/CDC20/RAD51/RFC3/CCNB1/KPNA2/CDT1/RRM1/DNA2/CDKN2C/KIF2C/ASF1B/RRM2/LBR/MCM3/CDCA7/UBE2T/EZH2/STMN1/NCAPH/SGO1/MKI67/SMC2/CCNB2/CDK1/BUB1/ANLN/CDK2/TK1/PTTG1/CCNA2/HMGB2/PRC1/NUSAP1/TOP2A/AURKB/KIFC1
WHITFIELD_CELL_CYCLE_G2	169	-0.711756	-2.43723	1e-10	3.22966e-09	2.07114e-09	4687	tags=58%, list=11%, signal=52%	NFIC/MND1/FAM72B/KIF5B/PCED1A/ESPL1/ARHGAP11B/FZR1/CENPL/CEP350/NEIL3/DET1/SAP30/RDH11/MUC1/TRIM69/CFLAR/BRD8/ADGRG6/NIPBL/ATL2/GABPB1/BORA/KBTBD2/C2orf69/STK17B/HSPA2/CDR2/WDR62/BCLAF1/PSRC1/MET/TFAP2A/RHNO1/KPNA2/NCAPD3/CCNF/NUMA1/HAUS8/ARHGEF39/POLQ/CYTH2/ASXL1/CDKN2C/ARHGAP11B/MAD2L1/ARHGAP19/TEDC1/NUCKS1/MID1/SKA3/FANCD2/LBR/CIP2A/TRIM59/NLRP2/CBX5/WSB1/GAS2L3/CKAP2/TRAIP/G2E3/NMB/CCN4/CDCA2…
FUJII_YBX1_TARGETS_DN	194	-0.704342	-2.45591	1e-10	3.22966e-09	2.07114e-09	4105	tags=58%, list=9%, signal=53%	DKK1/RECK/SSRP1/YWHAH/MBNL1/MDM1/GINS2/CDKN3/IREB2/TBL1X/HELLS/TRIP13/NEIL3/KBTBD6/PRIM1/ZBTB14/FEN1/ODF2/EXO1/POLA2/DTNA/SH3RF1/VRK1/ENAH/PARPBP/CDC23/RAD51/CENPN/HIPK1/FABP5/OIP5/HNRNPL/RNASEH2A/MCM7/RFC3/XRCC3/MYBL1/CDT1/CCNF/RRM1/BRCA1/CDC6/RFC5/CHAF1A/PHF19/SPC25/FBXO5/UHRF1/DTL/MAD2L1/ASF1B/DEPDC1/MCM2/FIGNL1/CASP2/RRM2/MCM10/FANCD2/SHCBP1/FANCI/MCM3/MCM4/NUP62/CDCA7/TAF9B/H2AZ2/DBN1/DEPDC1…
ZHAN_MULTIPLE_MYELOMA_PR_UP	46	-0.862347	-2.45772	1e-10	3.22966e-09	2.07114e-09	3677	tags=85%, list=8%, signal=78%	CENPL/TRIP13/E2F8/FAM72C/ZWILCH/TYMS/CCDC34/CCNB1/KPNA2/AURKA/SPC25/SPC24/NEK2/NUF2/RRM2/MCM10/FANCI/PRR11/UBE2T/EZH2/DEPDC1B/RFC4/RACGAP1/PCLAF/TTK/KIF14/CCNB2/CDK1/BIRC5/FOXM1/SKA1/DLGAP5/TPX2/UBE2C/PRC1/NUSAP1/TOP2A/BUB1B/ASPM
BLUM_RESPONSE_TO_SALIRASIB_DN	339	-0.667846	-2.46005	1e-10	3.22966e-09	2.07114e-09	3764	tags=54%, list=9%, signal=50%	GTF2I/SLC9A3R1/GINS2/CDKN3/B4GAT1/MTF2/TRIP13/NR4A2/ZNF443/SNRPA1/DHX15/SOX9/SUV39H1/PRIM1/FEN1/HSPA14/FNTB/NR2F1/MRE11/EXO1/POLA2/RGS5/H2AZ1/DBR1/HNRNPA2B1/SRSF2/TYMS/CARHSP1/VRK1/TRA2B/POLD1/RECQL4/TPI1/CD37/HSPB1/CDC20/CCNE2/RGS4/CHAF1B/HMMR/RAD51/SRRT/ITGB3BP/NFYB/EWSR1/SIM2/ABCC6/DCK/GUCY1B1/HSPA2/ORC1/SRSF10/ZBTB33/MED14/CRABP2/PARP1/RNASEH2A/HNRNPM/SRSF1/RFC3/DNMT1/NNAT/SRSF6/FANCA/COL1A1/…
MORI_IMMATURE_B_LYMPHOCYTE_DN	91	-0.790107	-2.47414	1e-10	3.22966e-09	2.07114e-09	3677	tags=71%, list=8%, signal=66%	CENPL/CDKN3/SLC16A1/E2F8/PRIM1/CKAP5/HMGN2/CDC20/RAD51/HNRNPA3/DCK/HAUS3/MCM7/DNMT1/CCNB1/KPNA2/ENPEP/RRM1/CDKN2C/DTL/NEK2/MCM2/RRM2/MCM10/MCM3/CDCA7/H2AZ2/EZH2/STMN1/MCM6/CDCA5/NCAPH/CDC45/RAD54L/SMC4/NDC80/CENPA/TUBA1A/CKS1B/TTK/H2AX/MKI67/SMC2/CCNB2/CDK1/CHEK1/MELK/LMNB1/CDCA3/DLGAP5/ANP32E/CCNA2/TUBA1B/TMPO/IQGAP3/UBE2C/CBX1/HMGB2/PRC1/NUSAP1/TOP2A/HJURP/KIFC1/TUBB/HMGB1
GRAHAM_NORMAL_QUIESCENT_VS_NORMAL_DIVIDING_DN	86	-0.795477	-2.49144	1e-10	3.22966e-09	2.07114e-09	3632	tags=66%, list=8%, signal=61%	GINS2/NUP85/CDKN3/TRIP13/FEN1/TYMS/VRK1/CDC20/CCNE2/FABP5/OIP5/RNASEH2A/RFC3/RRM1/CDC6/APOBEC3B/MSH2/DTL/KIF2C/MAD2L1/GINS1/MCM2/GMNN/RRM2/MCM10/NCAPG/MCM4/RAD51AP1/RFC4/RACGAP1/PCLAF/MCM6/GGH/CDC45/NDC80/CENPU/CEP55/CKS1B/ZWINT/SMC2/CCNB2/MCM5/CDK1/CHEK1/BIRC5/BUB1/MELK/TK1/DLGAP5/KIF15/CCNA2/PRC1/NUSAP1/KIF18B/TOP2A/BUB1B/KIF11
CROONQUIST_NRAS_SIGNALING_DN	70	-0.828693	-2.49302	1e-10	3.22966e-09	2.07114e-09	3541	tags=83%, list=8%, signal=76%	CDKN3/TRIP13/SNRPA1/BRD8/POLD1/CDC20/OIP5/MCM7/RFC3/PTP4A3/CCNB1/NASP/AURKA/CDC6/APOBEC3B/CHAF1A/PLK1/SPC25/POLD3/KIF2C/GINS1/MCM2/WEE1/MCM3/MCM4/MYBL2/PCLAF/STMN1/TRAIP/KIF22/NCAPH/SMC4/NDC80/CENPA/CDC25C/CKS1B/H2AX/SPAG5/ZWINT/MKI67/SMC2/CCNB2/STIL/CDK1/CHEK1/PLK4/FOXM1/TK1/PTTG1/TPX2/CCNA2/UBE2C/HMGB2/TOP2A/AURKB/BUB1B/KIF11/PLOD2
KOBAYASHI_EGFR_SIGNALING_24HR_DN	251	-0.695586	-2.49877	1e-10	3.22966e-09	2.07114e-09	3632	tags=60%, list=8%, signal=56%	GINS2/PNN/CDKN3/HELLS/TRIP13/SNRPA1/SOX9/E2F8/PRIM1/FEN1/HSPA14/EXO1/POLA2/HNRNPDL/H2AZ1/ZWILCH/TYMS/VRK1/DCBLD2/SPDL1/CDC20/CCNE2/SPRED2/HMMR/RAD51/SLC43A3/CENPN/STC1/FABP5/ITGA6/ORC1/PSRC1/MET/RNASEH2A/MCM7/RFC3/MAFF/MSH6/CCNB1/PSMC3IP/KPNA2/NCAPD3/PARP2/GINS3/MYBL1/AURKA/CDT1/CCNF/RRM1/BRCA1/CDC6/RFC5/CHAF1A/WWTR1/PLK1/SPC25/MSH2/EXOSC8/NETO2/DTL/POLA1/KIF2C/MAD2L1/GINS1/DNAJC9/ASF1B/NEK2/DSN1…
LE_EGR2_TARGETS_UP	110	-0.773982	-2.50603	1e-10	3.22966e-09	2.07114e-09	2695	tags=64%, list=6%, signal=60%	H2AZ1/HNRNPA2B1/TNC/CDC20/SPRED2/LIN9/RAD51/PDE8A/CORO1C/MARCKS/MCM7/SLC4A7/CCNB1/KPNA2/AURKA/RRM1/RFC5/TNFAIP8/PLK1/UHRF1/KIF2C/MAD2L1/DNAJC9/EZR/REEP1/FIGNL1/RRM2/CDC7/RBL1/ECT2/MCM4/CIP2A/TRIM59/UBE2T/EZH2/NAV2/INCENP/PCLAF/COL18A1/KIF22/NCAPH/KIF20A/TCF19/CKS1B/SOX2/H2AX/CSRP2/MKI67/SMC2/CDCA8/CCNB2/PLEKHO1/USP1/MCM5/MARCKSL1/CDK1/BIRC5/BUB1/PLK4/LMNB1/CCNA2/NT5DC2/IQGAP3/HMGB2/PRC1/NUSAP1/CA…
MOLENAAR_TARGETS_OF_CCND1_AND_CDK4_DN	57	-0.858107	-2.52436	1e-10	3.22966e-09	2.07114e-09	3645	tags=74%, list=8%, signal=68%	MED30/ERI1/TRIP13/DDIAS/CDCA7L/MTFR2/MCM7/PSMC3IP/MYBL1/AURKA/CDC6/RFC5/SPC25/CDKN2C/DTL/POLD3/KIF2C/TMSB15A/CDCA7/CIP2A/CENPH/GAS2L3/MNS1/CENPK/PCLAF/CDCA2/NCAPH/KIF20B/CDC45/FAM83D/KIF20A/ZNF367/KNL1/CEP55/CDCA8/CENPF/E2F7/MELK/KIF4A/TPX2/HJURP/KIF11
HOFFMANN_LARGE_TO_SMALL_PRE_BII_LYMPHOCYTE_UP	153	-0.746999	-2.52933	1e-10	3.22966e-09	2.07114e-09	4038	tags=67%, list=9%, signal=61%	ZNF358/UBE2S/DBF4/CENPE/CENPL/CDKN3/HELLS/TRIP13/E2F8/FEN1/WDHD1/CKAP5/COIL/JADE1/SPDL1/CDC20/CHAF1B/ABR/RAD51/HAUS6/EIF2AK2/RFC3/DNMT1/ANP32B/BRCA2/CCNB1/KPNA2/NASP/AURKA/AARS1/RRM1/XPO1/ENO1/DNA2/MMP14/NEDD4/RFC5/SSX2IP/CDKN2C/POLA1/KIF2C/NUCKS1/NEK2/RRM2/FAM111A/MCM10/RBL1/ECT2/MYEF2/CIP2A/UBE2T/CBX5/LDHA/RACGAP1/INCENP/PCLAF/STMN1/MCM6/CDCA5/KIF22/NCAPH/CDC45/MIS18BP1/RAD54L/SGO1/SMC4/NDC80/K…
ZHOU_CELL_CYCLE_GENES_IN_IR_RESPONSE_6HR	84	-0.808928	-2.53473	1e-10	3.22966e-09	2.07114e-09	3632	tags=79%, list=8%, signal=72%	GINS2/TRIP13/POC1A/SAP30/E2F8/WDHD1/EXO1/PARPBP/CHAF1B/RAD51/FABP5/MTFR2/HAUS3/MCM7/GINS3/QSER1/CDT1/BRCA1/RFC5/HAUS8/FBXO5/UHRF1/DTL/MAD2L1/DNAJC9/NEK2/DSN1/MCM2/GMNN/LBR/TOPBP1/MCM3/PIMREG/UBE2T/EZH2/MYBL2/CENPK/RFC4/RACGAP1/PCLAF/MCM6/CDCA5/KIF22/RAD54L/KIF20A/CENPA/CEP55/SEMA3B/TTK/H2AX/KNTC1/SMC2/CDCA8/USP1/MCM5/TIMELESS/CDK2/LMNB1/DLGAP5/CCNA2/DEK/HMGB2/NUSAP1/KIFC1/RTKN2/KIF11
PUJANA_BREAST_CANCER_WITH_BRCA1_MUTATED_UP	57	-0.865977	-2.54752	1e-10	3.22966e-09	2.07114e-09	4035	tags=79%, list=9%, signal=72%	UBE2S/CNOT9/PNN/MTF2/MRE11/CDC20/HMMR/SRSF10/SRSF11/CAD/RFC3/DNMT1/NASP/CEP57/AURKA/DNA2/MSH2/CDKN2C/EXOSC8/ILF3/MCM2/HMGN4/BLM/CDC7/LBR/TOPBP1/MCM4/RAD51AP1/EZH2/MYBL2/RFC4/STMN1/MCM6/RAD54L/SMC4/NDC80/CENPA/NCAPD2/USP1/MCM5/CDK1/FOXM1/DEK/SKP2/AURKB
WHITEFORD_PEDIATRIC_CANCER_MARKERS	115	-0.785773	-2.55007	1e-10	3.22966e-09	2.07114e-09	2710	tags=69%, list=6%, signal=65%	BCAT1/GABRB2/TYMS/RECQL4/HAUS1/CENPN/RNASEH2A/MCM7/RFC3/DNMT1/CCDC34/CCNB1/KPNA2/NASP/AURKA/ENO1/POLQ/MEX3B/UHRF1/ILF3/MAD2L1/TMEFF1/ASF1B/NEK2/NUF2/GAPDH/RRM2/PBK/MCM4/CDCA7/GPX7/UBE2T/MYBL2/CKAP2/RFC4/STMN1/LMNB2/ATAD2/MYCN/CDCA5/GGH/CDCA2/NCAPH/CDC45/SMC4/CENPA/ZNF367/CENPU/TUBA1A/CKS1B/TTK/H2AX/ZWINT/MKI67/CDCA8/KIF14/CCNB2/MCM5/CENPF/CDK1/BIRC5/BUB1/PLK4/MELK/TK1/SOX4/DLGAP5/PTTG1/TPX2/CCNA2…
ZHOU_CELL_CYCLE_GENES_IN_IR_RESPONSE_24HR	126	-0.776493	-2.57128	1e-10	3.22966e-09	2.07114e-09	3724	tags=71%, list=9%, signal=66%	SQOR/SMPD4/CDKN3/LAMB1/TRIP13/POC1A/NEIL3/E2F8/ODF2/EXO1/FGFR1OP/POLD1/CDC20/BORA/PARPBP/HMMR/CENPN/FABP5/MTFR2/HAUS3/MCM7/TDP1/CCNB1/KPNA2/NASP/GINS3/QSER1/RFC5/HAUS8/SPC25/EXOSC8/FBXO5/UHRF1/MAD2L1/DNAJC9/NEK2/LXN/DEPDC1/MCM2/NUF2/LBR/TOPBP1/MCM3/PIMREG/MCM8/H2AZ2/UBE2T/EZH2/MYBL2/CENPK/CKAP2/RFC4/RACGAP1/KIF22/MXRA5/NUP107/RAD54L/KIF20A/CENPA/CEP55/SEMA3B/TTK/H2AX/SPAG5/KNTC1/SMC2/CDCA8/CCNB2/…
PYEON_CANCER_HEAD_AND_NECK_VS_CERVICAL_UP	189	-0.745277	-2.59347	1e-10	3.22966e-09	2.07114e-09	4329	tags=60%, list=10%, signal=54%	LINC00342/HNRNPA1/PRPF39/PIGA/RASEF/DDX59/OPA1/PDIK1L/PRPS2/MTF2/HELLS/NR4A2/DDX3X/TXNDC16/XIST/PRDM15/CCDC18/SF3B1/CDC42BPA/USP37/E2F8/U2SURP/FAM72C/WDHD1/ENOSF1/CEP44/RIMKLB/TUG1/ATP8B1/ANKRD36B/CCHCR1/CCNE2/CXADR/HACE1/ZBTB8A/REL/KRT19/SKIL/PAXBP1/WDR76/C2CD5/INTS7/FANCL/ARL13B/MIS18A/PXYLP1/SYCP2/THAP9-AS1/ZFX/NASP/FNBP1L/NSD3/PSIP1/MSL2/NUP62CL/RFC5/SLF1/OCLN/SLF2/HNRNPU/UHRF1/DTL/ANKLE2/POL…
LEE_EARLY_T_LYMPHOCYTE_UP	108	-0.807782	-2.60263	1e-10	3.22966e-09	2.07114e-09	3296	tags=65%, list=8%, signal=60%	NEIL3/FAIM/CENPW/E2F8/FAM72C/TYMS/CEP128/HMMR/DIAPH3/GNA15/RAPGEF5/OIP5/SCRN1/SLC1A4/CCNB1/AURKA/E2F2/UHRF1/DTL/KIF2C/GINS1/NEK2/MCM2/NUF2/RRM2/SYK/MCM10/PBK/FANCI/NCAPG/MCM4/TMSB15A/RAD51AP1/PRR11/CD99/UBE2T/PCLAF/ATAD2/GGH/CDCA2/SGO2/NDC80/KIF20A/CENPA/CENPU/KNL1/CEP55/TTK/MKI67/KIF14/CCNB2/CDK1/E2F7/BIRC5/BUB1/MELK/CDCA3/DLGAP5/KIF15/PTTG1/UBE2C/PRC1/NUSAP1/KIF18B/TOP2A/NSD2/BUB1B/ASPM/KIF11/T…
FISCHER_G2_M_CELL_CYCLE	236	-0.738543	-2.61361	1e-10	3.22966e-09	2.07114e-09	4620	tags=65%, list=11%, signal=59%	CSPG4/KCTD9/FNBP4/RIN2/DBF4B/ZNF267/KIF5B/ESPL1/ARHGAP11B/UBE2S/DBF4/FZR1/MAT2A/KMT5B/NET1/CENPE/NUMB/CDC42EP4/CENPL/TGIF1/CEP350/TRIP13/ZNF165/NEIL3/ATF7IP/SAP30/PNRC2/DCLRE1C/ZMYM1/RDH11/RSBN1/CTNND1/NUP37/CKAP5/CFLAR/BRD8/ADGRG6/ACSL4/ARL6IP1/CDC20/FYN/HMMR/NFYB/STK17B/ELK3/UBE2D1/OIP5/CDR2/PSRC1/TDP1/RAD21/BTBD3/CCNB1/KPNA2/AURKA/CCNF/SMTN/ARHGEF39/MPHOSPH9/POLQ/PLK1/LAMC1/CDKN2C/DZIP3/ARHGAP…
CROONQUIST_IL6_DEPRIVATION_DN	95	-0.826466	-2.62047	1e-10	3.22966e-09	2.07114e-09	2610	tags=73%, list=6%, signal=68%	TYMS/POLD1/CDC20/CCNE2/HMMR/OIP5/MCM7/RFC3/PTP4A3/CCNB1/KPNA2/NASP/AURKA/CCNF/BRCA1/CDC6/APOBEC3B/CHAF1A/PLK1/SPC25/GALK1/KIF2C/MAD2L1/GINS1/MCM2/RRM2/WEE1/FANCI/MCM3/MCM4/MYBL2/PCLAF/STMN1/TRAIP/GGH/KIF22/NCAPH/CDC45/SMC4/CENPA/AASS/CKS1B/SPAG5/ZWINT/KNTC1/MKI67/SMC2/KIF14/CCNB2/STIL/CDK1/CHEK1/BUB1/PLK4/FOXM1/TK1/PTTG1/TPX2/ANP32E/CCNA2/UBE2C/HMGB2/TOP2A/SKP2/AURKB/KIFC1/BUB1B/KIF11/FRZB
KONG_E2F3_TARGETS	101	-0.816116	-2.62879	1e-10	3.22966e-09	2.07114e-09	3007	tags=71%, list=7%, signal=67%	PRIM1/FEN1/MAPK8/TYMS/SPDL1/CDC20/CHAF1B/HMMR/RAD51/DCK/CCNB1/NASP/AURKA/CCNF/BRCA1/PSIP1/CDC6/DNA2/PLK1/SPC25/KIF2C/CENPQ/ASF1B/DEPDC1/NUF2/FIGNL1/FAM111A/CDC7/RBL1/SHCBP1/PBK/NCAPG/MCM3/RAD51AP1/CENPH/UBE2T/EZH2/CENPK/RACGAP1/INCENP/PCLAF/CDCA5/NCAPH/RAD54L/ERCC6L/KIF20A/H2AX/NCAPD2/MKI67/SMC2/TACC3/USP1/CENPF/NCAPG2/BUB1/MELK/LMNB1/TK1/CDCA3/DLGAP5/TPX2/CCNA2/IQGAP3/UBE2C/HMGB2/PRC1/NUSAP1/TOP…
VILLANUEVA_LIVER_CANCER_KRT19_UP	174	-0.764695	-2.63266	1e-10	3.22966e-09	2.07114e-09	4229	tags=64%, list=10%, signal=58%	TDG/CENPM/P3H4/KIAA1958/PIGA/SFMBT1/HK2/AP1G2/STK4/CENPE/PCYOX1L/DHRS13/ARID3A/RIC8B/HMGXB4/DCLRE1C/SOX9/USP37/C2CD4A/NUAK1/ZBED5/CWC22/MRE11/SUMO2/NCOA6/PHTF2/SALL4/DENND2B/TUG1/FUBP1/DROSHA/MARCHF3/CDC20/DCLRE1B/ZNF397/EPC1/CTNND2/SFI1/C2CD5/ANP32B/CENPO/BTBD3/MAP3K4/ADAM17/RRM1/THOC1/DNA2/AGO1/CYTH2/POLD3/POLA1/KIF2C/GINS1/MACROH2A2/ZNF292/BLM/CASP2/MCM10/CDC7/TROAP/ECT2/FANCI/NCAPG/MCM8/ZNF67…
PUJANA_XPRSS_INT_NETWORK	168	-0.768709	-2.63359	1e-10	3.22966e-09	2.07114e-09	4133	tags=64%, list=10%, signal=58%	ESPL1/RB1/UBE2S/MAT2A/CNOT9/PMS2P3/PNN/MTF2/SNRPA1/CTCF/DDX39B/MRE11/RIF1/HMGN1/FUBP1/LARP7/CDC20/CENPC/HMMR/PAXIP1/NFYB/NAE1/RECQL/SRSF10/SRSF11/CAD/RFC3/DNMT1/BRCA2/SMC3/RAD21/NASP/CEP57/SUZ12/AURKA/CCNF/RRM1/BRCA1/PSIP1/XPO1/DNA2/CHAF1A/ATM/MPHOSPH9/SPC25/MSH2/CDKN2C/EXOSC8/POLA1/ILF3/MAD2L1/GINS1/DNAJC9/TCF3/MCM2/HMGN4/BLM/CASP2/CDC7/LBR/FANCI/TOPBP1/NEMP1/MCM4/RAD51AP1/POLE/H2AZ2/EZH2/MYBL2/…
CHICAS_RB1_TARGETS_GROWING	243	-0.751432	-2.6751	1e-10	3.22966e-09	2.07114e-09	3976	tags=61%, list=9%, signal=56%	SSRP1/DOCK10/C1QTNF2/ZNF22/LSM2/PRICKLE1/UBR7/IMPA2/GINS2/CDKN3/PTN/HELLS/CERS6/RBMS3/CDC42BPA/PRIM1/FAM72C/ADGRG6/PDGFD/CASP6/RIF1/JADE1/SMARCC1/NFXL1/CDC20/HAUS1/CCNE2/RGS4/HMMR/ITGB3BP/IGFBP3/NFYB/CDCA7L/FABP5/CNTN3/SLC1A4/SPIN4/MARCKS/C2CD5/RNASEH2A/MCM7/FBXO11/FANCL/SMC3/MSH6/CCNB1/TOX/NASP/NRGN/CEP57/RNF138/PSIP1/APOBEC3B/TNFAIP8/SCARA3/CTDSPL2/C1orf21/CRYBG1/MSH2/EXOSC8/UHRF1/GINS1/DNAJC9/…
DUTERTRE_ESTRADIOL_RESPONSE_24HR_UP	323	-0.743258	-2.73357	1e-10	3.22966e-09	2.07114e-09	3062	tags=64%, list=7%, signal=60%	SLC9A3R1/BCL2/IMPA2/CENPL/GINS2/NUP85/HELLS/TRIP13/STC2/WDR34/MYO19/SUV39H1/E2F8/PRIM1/FEN1/WDHD1/MRE11/TFAP4/C21orf58/EXO1/POLA2/SGK3/COLGALT1/ZWILCH/TYMS/VRK1/DDIAS/POLD1/RECQL4/SPDL1/REXO5/CCNE2/CHAF1B/DCLRE1B/MAN1A1/RAD51/MMS22L/TMED8/CHTF18/CDCA7L/KCNK5/CENPN/STC1/FANCC/WDR76/WDR62/MTFR2/TONSL/RNASEH2A/MCM7/RFC3/DNMT1/CLSPN/DEGS2/FANCA/MIS18A/BRCA2/XRCC3/CENPO/CCDC34/PSMC3IP/NCAPD3/NASP/GINS…
ROSTY_CERVICAL_CANCER_PROLIFERATION_CLUSTER	140	-0.836304	-2.7956	1e-10	3.22966e-09	2.07114e-09	4144	tags=79%, list=10%, signal=72%	CENPM/ESPL1/MCUB/UBE2S/DBF4/CENPE/HELLS/TRIP13/SLC38A1/E2F8/FEN1/POLA2/H2AZ1/TYMS/SPDL1/CDC20/CCNE2/CHAF1B/HMMR/OIP5/CCNB1/KPNA2/AURKA/CCNF/BRCA1/CDC6/DNA2/APOBEC3B/DNMT3B/POLQ/PLK1/NETO2/FBXO5/DTL/KIF2C/MAD2L1/GINS1/ASF1B/NEK2/MCM2/DSG2/GMNN/RRM2/MCM10/SHCBP1/PAQR4/ECT2/PBK/FANCI/NCAPG/MCM4/RAD51AP1/EZH2/MYBL2/GINS4/RACGAP1/PCLAF/ATAD2/GGH/NCAPH/KIF20B/ERCC6L/CDKN2A/SMC4/NDC80/KIF20A/CENPA/CENPU…
FLORIO_NEOCORTEX_BASAL_RADIAL_GLIA_DN	190	-0.828055	-2.88126	1e-10	3.22966e-09	2.07114e-09	2757	tags=70%, list=6%, signal=66%	EXO1/PDGFD/HMGN2/LRP4/NSUN7/CDC20/PARPBP/HMMR/SERTAD4/COL1A2/PSRC1/BRCA2/CCNB1/KPNA2/UGT8/AURKA/BRCA1/DUSP10/POLQ/PLK1/SPC25/SULT1C4/FBXO5/XRCC2/DTL/KIF2C/MAD2L1/GINS1/ARHGAP19/NEK2/DSN1/DEPDC1/NUF2/BLM/ESCO2/RRM2/SKA3/FAM111A/WEE1/FANCD2/TROAP/SHCBP1/PBK/FANCI/NEMP1/RAD51AP1/CIP2A/PIMREG/PRR11/TRIM59/UBE2T/DEPDC1B/GAS2L3/MYBL2/CENPK/CKAP2/RACGAP1/TRAIP/CDCA5/CDCA2/KIF22/NCAPH/CDC45/MIS18BP1/SGO2…
REACTOME_DECTIN_1_MEDIATED_NONCANONICAL_NF_KB_SIGNALING	62	0.783663	2.21442	1.01292e-10	3.24899e-09	2.08354e-09	4432	tags=73%, list=10%, signal=65%	PSME2/PSMD8/RPS27A/PSMA7/PSME1/PSMD1/PSMB5/PSMB6/PSMD9/PSMB10/PSMD14/PSMC4/PSMA6/PSMD2/PSMD7/SKP1/PSMA3/UBA52/PSMB4/PSMD13/UBB/PSMB1/PSMA5/PSMD4/PSMC2/PSMA4/PSMB7/PSMA2/PSMD6/UBE2M/PSMB3/PSME3/PSMC3/PSMC1/PSMB2/PSMF1/PSMD11/PSMC6/CHUK/PSMC5/SEM1/CUL1/PSMD12/PSMB8/PSMD3
BASAKI_YBX1_TARGETS_UP	289	-0.529062	-1.93415	1.02808e-10	3.27517e-09	2.10033e-09	3214	tags=45%, list=7%, signal=42%	SNRPA1/FBN1/CENPW/MYO19/PLK2/FEN1/WDHD1/C3orf14/SKA2/POLA2/RND3/ZWILCH/TYMS/MISP/PRPF3/SPDL1/CDC20/BORA/LINC01224/RAD51/LARP6/DIAPH3/OSMR/SFN/CENPN/OIP5/EPHA2/ADRB2/MCM7/CAD/RFC3/MT1F/MIS18A/CENPO/MT1X/GLS/CCNB1/PSMC3IP/KPNA2/FLNB/DKK3/MYBL1/AURKA/RBPMS/TPM4/CDC6/RFC5/CHAF1A/PHF19/PLK1/UHRF1/DTL/KIF2C/MAD2L1/SPC24/GINS1/DNAJC9/CAVIN1/ASF1B/NEK2/DEPDC1/MCM2/NUF2/LAMC2/CREBZF/MCM10/SHCBP1/PBK/FANCI…
REACTOME_NEUTROPHIL_DEGRANULATION	466	0.49495	1.77176	1.18185e-10	3.73958e-09	2.39816e-09	4522	tags=33%, list=10%, signal=30%	TCN1/FTL/QPCT/RAP1A/APRT/CTSH/APEH/CDA/CD55/FUCA1/EEF1A1/IMPDH1/CREG1/PSAP/CFP/EEF2/LTF/PRKCD/TOM1/CST3/GSTP1/IMPDH2/TMEM30A/MVP/HMOX2/ASAH1/VAT1/SERPINA3/VAMP8/PRDX6/HSPA8/LCN2/CTSA/TRAPPC1/NME2/ATP6V1D/ACAA1/IDH1/GM2A/ATP6V0C/RAB7A/PTGES2/PA2G4/RAB5C/ITGB2/CD59/PSMD1/GOLGA7/NIT2/TMEM179B/HSP90AB1/LAMTOR3/GAA/TOLLIP/GRN/PSMD14/CAP1/SRP14/CD63/S100A9/OSTF1/CCT8/PYGB/SNAP29/ENPP4/RHOG/ALAD/GYG1/PS…
TANG_SENESCENCE_TP53_TARGETS_DN	55	-0.787747	-2.30347	1.23545e-10	3.88295e-09	2.4901e-09	2338	tags=65%, list=5%, signal=62%	CDC20/ZFY/PPL/NRGN/TCF4/FBXO5/NEK2/TREM1/PBK/NUP62/EZH2/RACGAP1/KIF20B/SMC4/KIF20A/CENPA/TTK/SPAG5/CCNB2/CDK1/BIRC5/BUB1/PLK4/LMNB1/TK1/KIF4A/PTTG1/TPX2/BARD1/CCNA2/UBE2C/PRC1/NUSAP1/TOP2A/AURKB/KIF11
LIM_MAMMARY_STEM_CELL_UP	479	-0.463531	-1.75086	1.38041e-10	4.30966e-09	2.76374e-09	5013	tags=36%, list=12%, signal=32%	MEDAG/DUSP6/EGR3/SLC4A3/FOXP1/HAS2/POPDC2/RARRES2/TMEM121/CARD10/LUZP1/CSPG4/FLRT2/RFX2/EGR2/SMIM13/PKD1/SPRED1/CNN1/CPXM1/AKT3/ITGB4/TGFB1I1/RECK/LIMA1/SLCO3A1/PCBP4/DOCK10/EVC/PHLDB1/TAGLN/MCAM/PRICKLE1/MBNL1/UCN2/IGFBP2/SERPING1/DCUN1D3/IL6ST/LRP1/LAMB1/PCDH19/ERF/ITGA1/NRP2/IL1B/FXYD1/BCAR1/SSH1/TRIM9/BVES/MYC/MAP3K7CL/RAPGEF1/ABI3BP/TGFBR3/RND3/PTGS2/PROS1/SCARF2/PRX/EOGT/LRP4/DCBLD2/DZIP1L/…
SPIELMAN_LYMPHOBLAST_EUROPEAN_VS_ASIAN_UP	484	0.499928	1.79584	1.5385e-10	4.7714e-09	3.05985e-09	5171	tags=42%, list=12%, signal=37%	ARHGDIB/RPS27L/ACTA2/FDXR/APRT/PSME2/RPL4/ALDH6A1/DCXR/RPS28/IMPDH1/C1QBP/GPX1/COX5B/BAX/AHCY/ATP1A1/CST3/DDT/ATP5F1D/RPS23/PKN1/RPL37A/ACOT7/RPL23/ACY1/RPL27A/ELOB/COX6A1/UQCRQ/CALM1/GPX4/MPST/TXN2/NSDHL/TOMM40/ATP5PF/COX6B1/NME2/ATP5IF1/BCAT2/ATP5MC3/RPL19/MRM2/VAMP2/RPS8/FARSA/COX6C/COX4I1/NDUFB8/H2BC5/NDUFS5/AP1B1/NDUFS8/NDUFA2/GIPC1/HAGH/HSPA9/RPS7/GBA/RAB1B/NDUFA3/CNPPD1/PARK7/NDUFV2/RPL36/…
REACTOME_BIOLOGICAL_OXIDATIONS	213	0.59484	1.98211	1.59914e-10	4.92682e-09	3.15951e-09	5055	tags=35%, list=12%, signal=31%	PAPSS2/CYP4B1/CYP2A6/MAOA/SULT1A1/FDXR/AHRR/CYP1A1/ALDH2/SULT1A2/GSTA2/AHCY/CYP1B1/NAT1/ALDH1B1/UGT2B11/ACSS1/GSTP1/CYP39A1/GGT5/FDX2/ACY1/CNDP2/EPHX1/ABHD14B/GCLC/UGT1A3/SULT1E1/CYP2A7/GSTM4/HSP90AB1/SULT1A3/ALDH1A1/NNMT/COMT/TPMT/GGT7/CYP2J2/NAT2/GGCT/CYP24A1/POR/SLC35B2/GSS/CHAC2/CYP2B6/GGT1/MGST3/GSTO1/AHRR/UGT1A1/ADH1C/FMO3/NQO2/CYP1A2/FDX1/GSTM3/ESD/CMBL/ACSS2/TPST2/MGST1/UGT1A6/CES1/CYP2R1…
PASINI_SUZ12_TARGETS_DN	316	-0.514993	-1.88598	1.64848e-10	5.04565e-09	3.23572e-09	5427	tags=44%, list=12%, signal=39%	PERP/BHLHE40/ETS1/LGALS1/TMBIM1/RAP2B/BTG2/AKT1/DUSP6/TNFRSF12A/FOXP1/IGFBP5/APP/CLDN12/GNAS/PRSS23/LTB/CNN1/AMMECR1L/ZNF562/CA3/PARVA/TGFB1I1/SOCS6/TAGLN/PRICKLE1/NPNT/PHC2/CMTM3/AIF1L/PITX2/FARP1/LOXL2/ILK/RYK/SOAT1/MYC/SH3BGRL/PLK2/NUAK1/RND3/ANXA5/RO60/ACSL4/DCBLD2/LPP/PXDN/GNG2/CXADR/COL5A1/IGFBP3/CAV2/KRT19/DOCK11/SFN/SERTAD4/SKIL/COL1A2/CORO1C/S100A10/MARCKS/MYH10/TMCC3/PPP1R18/RBMS1/AMOTL…
LINDGREN_BLADDER_CANCER_CLUSTER_3_UP	325	-0.506803	-1.86567	1.84971e-10	5.62479e-09	3.60712e-09	3818	tags=40%, list=9%, signal=37%	CENPE/LIG3/IMPA2/GINS2/OTULIN/PRPS2/GNB3/SLC11A2/ZNF148/TRIP13/POC1A/RASL11B/TNFAIP1/SLC25A40/ZNF286A/SOAT1/WDR34/RBM38/RAB11FIP4/E2F8/C12orf75/FAM200B/WDHD1/SKA2/NCOA6/EXO1/H2AZ1/TYMS/HMGN2/ACSL4/VRK1/RMI2/MLF1/REXO5/CHAF1B/RAD51/GLO1/AFDN/CENPN/PYCR1/ORC1/GUCY1A1/RNASEH2A/RFC3/INSIG1/MIS18A/DAPK1/CCNB1/KPNA2/NASP/ADAM17/AURKA/CDT1/BRCA1/CDC6/APOBEC3B/CHAF1A/GCA/PHF2/PLK1/MSH2/CDKN2C/NETO2/KIF2C…
REACTOME_DEGRADATION_OF_AXIN	55	0.802675	2.22912	2.11217e-10	6.38149e-09	4.09238e-09	4846	tags=76%, list=11%, signal=68%	PSME2/PSMD8/RPS27A/PSMA7/PSME1/PSMD1/PSMB5/PSMB6/PSMD9/PSMB10/PSMD14/PSMC4/PSMA6/PSMD2/PSMD7/PSMA3/UBA52/PSMB4/PSMD13/UBB/PSMB1/PSMA5/PSMD4/PSMC2/PSMA4/PSMB7/PSMA2/PSMD6/PSMB3/PSME3/PSMC3/PSMC1/PSMB2/PSMF1/PSMD11/PSMC6/PSMC5/SEM1/PSMD12/PSMB8/PSMD3/PSMB9
ELVIDGE_HYPOXIA_UP	171	-0.60034	-2.06855	2.40916e-10	7.2321e-09	4.63787e-09	3861	tags=47%, list=9%, signal=43%	HK2/ASPH/P4HA2/ANGPTL4/STC2/AHNAK2/LOXL2/RRAGD/SOX9/BBX/SPRY1/RLF/S100A4/DTNA/HILPDA/ARTN/PXDN/DAAM1/ATXN1/ANKZF1/FYN/GYS1/EGFR/IGFBP3/LOXL1/STC1/HEY1/MET/ISG20/MAFF/PIM1/GBE1/CA9/ANG/FLNB/SAT1/PLIN2/TNFAIP8/YEATS2/PFKP/NOL3/YPEL1/INHA/CAVIN1/TMEFF1/PDGFB/PGAP1/PGK1/ZNF292/CSGALNACT1/EGR1/PLAUR/VEGFA/PGM1/WSB1/RNASE4/PAM/SPAG4/SLC2A1/FAM13A/ALDOC/CSRP2/P4HA1/CAV1/OBSL1/OLFML2A/TMEM45A/GJA1/ENO2/E…
WAMUNYOKOLI_OVARIAN_CANCER_LMP_UP	269	0.564256	1.93008	2.42537e-10	7.23441e-09	4.63935e-09	4457	tags=46%, list=10%, signal=41%	NQO1/RPS27L/HPGD/EPS8L2/TUBA4A/TALDO1/MRPL41/UQCR11/ETFB/NDUFAF2/AURKAIP1/GSTP1/ACY1/MVP/MT-ATP6/COX6A1/UQCRQ/MPST/TOMM40/MLPH/TPT1/CLPTM1L/TTLL12/ACAA1/RRBP1/EIF2B5/MCRIP2/GIPC1/SH3BGRL2/HM13/SCAMP2/AKR1C3/EIF5B/CNPPD1/TXN/CD59/ABHD6/ABCD3/SGPP2/MRPL52/STARD10/GALE/MYL12B/TMEM125/C9orf152/JTB/DOHH/ABHD11/PSMB10/PLPP2/ATP5MD/BAG1/FOXQ1/CIB1/SIRT7/DDAH1/EIF4G1/TRAPPC5/POR/NADSYN1/GSS/CAMK2N1/TMC6/…
NABA_CORE_MATRISOME	273	-0.535015	-1.93631	2.46363e-10	7.302e-09	4.6827e-09	3666	tags=27%, list=8%, signal=25%	LGI2/NPNT/IGFBP2/NID1/VWA5A/LAMB1/MATN3/FGL1/VWA5B2/FBN1/COL27A1/ABI3BP/INTS14/NTNG1/NDNF/CRISPLD2/PXDN/TNC/COL5A1/IGFBP3/COL4A6/AGRN/HAPLN3/COL1A2/EMILIN2/FBLN5/CTHRC1/FBN2/RSPO2/COL1A1/TINAGL1/LAMC1/LGI1/COL14A1/CRIM1/COL7A1/LAMC2/COCH/LTBP4/SPOCK3/COL5A2/NID2/VWA1/COL18A1/COL16A1/CCN4/COL3A1/MXRA5/COL2A1/COL19A1/INTS6L/LAMA3/COL4A2/COL11A1/VIT/LAMA5/FRAS1/SPARC/FBN3/EMID1/SNED1/SLIT2/IGFBP7/CO…
EGUCHI_CELL_CYCLE_RB1_TARGETS	22	-0.915817	-2.24425	2.49469e-10	7.34758e-09	4.71192e-09	2961	tags=100%, list=7%, signal=93%	FEN1/CCNE2/MCM7/NEK2/MCM2/ECT2/MCM3/MCM4/MCM6/SMC4/NDC80/KIF20A/CDC25C/SMC2/CDCA8/MCM5/BUB1/KIF18A/CCNA2/HMGB2/KIF11
LI_AMPLIFIED_IN_LUNG_CANCER	181	0.617361	2.03989	2.65874e-10	7.7818e-09	4.99039e-09	2444	tags=41%, list=6%, signal=39%	NQO1/AKR1B10/AKR1C1/TXNRD1/RPS5/APRT/TUFM/TKT/TALDO1/HSPD1/RPL7/PRDX1/KRT7/RPL28/PSMD8/RPS2/LTF/RPS10/CCT3/RPL23A/CYCS/RPS16/SPINK1/RPL37A/RPL8/SYNGR2/CCT5/RPL13/HSPE1/RPL27A/RPL31/COX6A1/NME1/SDHA/LCN2/NME2/RPL27/YIF1A/RPS27/RPL36A/LDHB/SCNN1A/PABPC1/RPL10A/EIF3C/RPL35/SPP1/EEF1A2/STAT1/PDCD6/RPS7/RPL17/RPS20/HSPA5/UQCRH/JTB/RPL37/PLPP2/EEF1D/ATP5MF/RPS4X/PGD/RPL38/ELOC/RPS21/RPL30/SPINT1/PSMB4/…
REACTOME_SUMOYLATION	186	-0.589004	-2.04226	2.7814e-10	8.09024e-09	5.18818e-09	4762	tags=42%, list=11%, signal=38%	POM121C/HNRNPC/SMC1A/WRN/DDX5/CREBBP/PIAS3/TDG/NCOA2/UBE2I/NUP85/PHC2/SENP1/PPARG/NR4A2/SP3/HDAC2/STAG2/NUP37/SAFB/SUMO2/NR5A2/SIN3A/RNF2/XRCC4/NUP160/HDAC7/NR5A1/NUP58/MRTFA/UHRF2/HNRNPK/NFKB2/PHC3/PARP1/ZNF350/ZBED1/DNMT1/SMC3/RAD21/CHD3/TFAP2A/RNF168/SMC5/EP300/SUZ12/AURKA/NCOR2/BRCA1/DNMT3B/SATB1/NUP54/STAG1/VHL/TP53BP1/THRB/BLM/NUP153/NUP62/CBX5/TPR/INCENP/AR/NUP107/CDKN2A/NSMCE4A/CDCA8/NFKB…
WU_APOPTOSIS_BY_CDKN1A_VIA_TP53	53	-0.790563	-2.30709	3.68375e-10	1.06488e-08	6.82893e-09	3232	tags=79%, list=7%, signal=73%	HMGB1P5/WDHD1/EXO1/HNRNPA2B1/TYMS/SPDL1/CCNB1/ZBTB5/NCAPD3/PARP2/AURKA/RRM1/ZNF84/MCM2/PBK/FANCI/NCAPG/MCM3/MCM4/VEGFA/UBE2T/RACGAP1/ATAD2/MCM6/MIS18BP1/TUBA1A/CEP55/TTK/KNTC1/MKI67/SMC2/CDK1/BUB1/ANLN/P4HA1/DLGAP5/TPX2/UBE2C/HMGB2/PRC1/AURKB/ASPM
JAATINEN_HEMATOPOIETIC_STEM_CELL_UP	316	-0.509638	-1.86637	3.76633e-10	1.08207e-08	6.93919e-09	4199	tags=40%, list=10%, signal=37%	AKT3/SMIM24/GLIDR/KIT/TBC1D24/WDR49/ASPH/SOCS6/HSH2D/ZNF512B/SYPL1/SERPING1/POGZ/SCN3A/MLLT3/CCDC171/ZNF165/FAIM/ZNRF1/TANC1/SV2A/SAMD13/PDE1A/SGK3/KCTD15/BCAT1/ADGRG6/SH3RF1/B4GALT6/TUG1/ZNF302/PRDM16/EOGT/DPY19L3/NEGR1/ALG10B/ADGRA3/HOXA3/ETV6/PDGFC/PXDN/PGBD1/HSPB1/COL5A1/GNA15/ITPRIPL2/SELENOP/ZBTB8A/CMAHP/FABP5/SCRN1/C11orf95/SOCS2/SPIN4/GATM/CTHRC1/RHOBTB1/GUCY1A1/GOLIM4/FANCL/DOCK7/KDM5B/Z…
REACTOME_RHO_GTPASES_ACTIVATE_FORMINS	139	-0.636208	-2.12144	4.42333e-10	1.26308e-08	8.09998e-09	4319	tags=52%, list=10%, signal=47%	ACTG1/CENPM/DYNC1LI2/SCAI/CENPE/CENPL/NUP85/ACTB/MIS12/B9D2/DVL3/NUP37/SKA2/CKAP5/TUBB2B/TUBA1C/CLASP1/FMNL1/ZWILCH/NUP160/ZW10/TAOK1/SPDL1/DAAM1/PPP2R5B/CDC20/CENPC/ITGB3BP/DIAPH3/MRTFA/CENPN/SRGAP2/TUBB1/CENPO/XPO1/PLK1/SPC25/EVL/KIF2C/MAD2L1/SPC24/CENPQ/DSN1/NUF2/FMNL3/CENPH/SRC/CENPK/INCENP/CENPI/NUP107/SGO2/SGO1/ERCC6L/NDC80/CENPA/CENPU/KNL1/TUBA1A/NDE1/ZWINT/KNTC1/CDCA8/FMNL2/CENPF/BIRC5/BU…
FRASOR_RESPONSE_TO_SERM_OR_FULVESTRANT_DN	49	-0.793824	-2.27531	4.83888e-10	1.37336e-08	8.80722e-09	3543	tags=71%, list=8%, signal=66%	NFRKB/BRPF1/PRIM1/MYC/POLA2/CAP2/CDC20/RNASEH2A/MCM7/AURKA/RRM1/RFC5/CHAF1A/CDKN2C/KIF2C/MCM2/BLM/WEE1/MCM3/POLE/MAZ/STMN1/MCM6/CKS1B/H2AX/MCM5/CENPF/TIMELESS/CDK1/FOXM1/TK1/BARD1/CCNA2/UBE2C/KIF11
REACTOME_REGULATION_OF_RUNX2_EXPRESSION_AND_ACTIVITY	73	0.751603	2.2028	5.12333e-10	1.44534e-08	9.26878e-09	4432	tags=67%, list=10%, signal=60%	PSME2/PSMD8/RPS27A/PSMA7/STUB1/PPARGC1A/STAT1/RUNX2/PSME1/PSMD1/PSMB5/ESRRA/PSMB6/PSMD9/PSMB10/PSMD14/PSMC4/HIVEP3/PSMA6/PSMD2/PSMD7/SKP1/PSMA3/UBA52/PSMB4/PSMD13/UBB/PSMB1/PSMA5/PSMD4/PSMC2/PSMA4/PSMB7/PSMA2/PSMD6/PSMB3/PSME3/PSMC3/PSMC1/PSMB2/PSMF1/PSMD11/PSMC6/PSMC5/SEM1/CUL1/PSMD12/PSMB8/PSMD3
HSIAO_LIVER_SPECIFIC_GENES	247	0.572409	1.93796	5.69091e-10	1.59584e-08	1.0234e-08	4852	tags=37%, list=11%, signal=33%	PON3/PROC/SAA1/TAT/FAH/SERPINA5/ACOX2/SC5D/CYP2A6/AKR1C1/C4BPA/ACADSB/HAL/ACAT1/ALDH2/ALDH6A1/CPS1/ACSM3/APOB/GSTA2/C4BPB/BAAT/FST/PCCB/DDT/F5/CYB5A/SOD1/TST/SERPINA3/EPHX1/HPX/APOH/APOE/ACAA1/ABCC2/BDH1/MMUT/PCBD1/DECR1/ALDH1A1/NNMT/CYP2J2/SUPT4H1/CPB2/NAT2/CRP/HMGCL/POR/RBP4/KYNU/CYP2B6/GLUD1/HPN/APCS/ASL/ASS1/SLC2A2/SERPINA7/FMO5/ALDOB/HSD17B4/GSTO1/F2/AKR1D1/PRDX4/FMO3/ACSL1/DHCR24/SAA4/CBS/S…
ELVIDGE_HYPOXIA_DN	147	0.648676	2.10518	6.00557e-10	1.65436e-08	1.06092e-08	5997	tags=61%, list=14%, signal=53%	ALDH4A1/IDH3A/WDR77/SLC7A6/EIF5A/CCND3/CEBPA/CCDC86/ACOT7/BOP1/MRPS12/CALM1/ZMPSTE24/GPS1/SRM/SLC52A2/AMD1/DOLK/PNO1/OGDH/GAS2L1/HSPA4/PPIF/SLC35C1/EEF1E1/KLC2/ARHGDIA/SORT1/NDUFS6/DNAJA1/SLC35B1/PIK3R3/CORO1B/GYG1/JAK2/BRMS1/HSF1/LARP4/BAK1/STX3/KPNA1/RANGAP1/GLUD1/GULP1/NR2F6/HSPH1/CORO1A/EXOSC4/TMEM33/TIMM23/RNASEH1/SDF2L1/ASPSCR1/TOR3A/DHX29/PSME3/LARS2/FLAD1/CTPS1/ARPC4/NCLN/PUS1/STIP1/LRRC5…
WANG_RESPONSE_TO_GSK3_INHIBITOR_SB216763_DN	363	-0.490422	-1.82512	5.99696e-10	1.65436e-08	1.06092e-08	3268	tags=37%, list=8%, signal=34%	WT1/SINHCAF/SLC16A1/CENPV/SUV39H1/E2F8/MYC/FEN1/BICDL1/EXO1/H2AZ1/HMGCS1/TYMS/FOXJ3/DDIAS/GMEB1/HDHD5/CCNE2/CHAF1B/RAD51/ST8SIA4/DIAPH3/FABP5/SLC1A4/SYT2/SPIN4/DENND11/MCM7/RFC3/INSIG1/CLSPN/PIM1/MTBP/JPT2/MSH6/PSMC3IP/NCAPD3/NASP/GINS3/BRCA1/CDC6/CHAF1A/GOLGA8IP/E2F2/SPC25/MSH2/PFKP/XRCC2/UHRF1/DTL/POLA1/TCTN2/TNFAIP3/MAD2L1/SPC24/GINS1/EZR/ASF1B/MCM2/NUF2/GMNN/BLM/ESCO2/RRM2/WEE1/MCM10/SHCBP1/P…
CHEMNITZ_RESPONSE_TO_PROSTAGLANDIN_E2_UP	147	-0.612932	-2.05351	6.00364e-10	1.65436e-08	1.06092e-08	2502	tags=42%, list=6%, signal=40%	IMPAD1/DDIAS/SPDL1/SH3KBP1/AFAP1L2/WDR76/RNASEH2A/FANCL/PTP4A3/CCNB1/AURKA/TPD52/CDC6/CHAF1A/UHRF1/ASF1B/RRM2/SKA3/KSR1/NES/NCAPG/MCM4/PIMREG/PRR11/PCLAF/ATAD2/NCAPH/CDC45/SGO2/ZGRF1/SMC4/KIF20A/MAP3K20/CENPU/KNL1/TTK/SPAG5/MKI67/BRIP1/CCNB2/CENPF/BIRC5/BUB1/LMNB1/TK1/DLGAP5/PTTG1/TPX2/BARD1/IQGAP3/UBE2C/NUP210/PRC1/OLFML2A/NUSAP1/FBXO17/GJC1/GTSE1/TOP2A/HJURP/BUB1B/ASPM
REICHERT_MITOSIS_LIN9_TARGETS	27	-0.885553	-2.28494	6.66584e-10	1.8255e-08	1.17068e-08	2294	tags=70%, list=5%, signal=67%	HMMR/CCNB1/AURKA/CCNF/PLK1/FBXO5/KIF2C/CDCA2/KIF20A/CENPA/KNL1/CEP55/NCAPD2/MKI67/CENPF/HMGB2/NUSAP1/TOP2A/ASPM
JOHNSTONE_PARVB_TARGETS_2_UP	144	0.648187	2.09811	7.23406e-10	1.9696e-08	1.26308e-08	4936	tags=53%, list=11%, signal=47%	GREB1/AKR1C1/TXNRD1/G6PD/CCRL2/CITED2/TNIK/EEF1A1/ALDH1A3/CLPTM1/FST/FKBP1A/SLC4A2/PKN1/WWC1/MT-ATP6/MT-ND4/EPHX1/TPT1/CLPTM1L/TRAPPC1/VSIR/SLC25A1/RPL36A/NSMF/EEF1A2/RPL5/OGDH/CD151/IGFBP6/ARHGDIA/EMB/IFIT2/GPR137/AKR1B1/APLP2/GPRC5A/SNAP29/WBP2/CORO1B/GRINA/BCL2L1/RAB29/FAM86C1/PLAAT4/FASN/BASP1/KRT18/IRX3/OAF/H1-0/TFPI2/MT-ND5/BSG/STXBP2/MT-CO1/ISG15/UBE2V1/GSTM3/IGFBP4/NDUFB1/OTUB1/IFIT1/ZNFX…
BLALOCK_ALZHEIMERS_DISEASE_INCIPIENT_DN	166	0.619247	2.02482	7.82669e-10	2.10957e-08	1.35285e-08	4407	tags=45%, list=10%, signal=41%	GLRX/ACAD8/ZMAT3/MAOA/SLC25A6/ALDH2/ATIC/GRPEL1/MRPL15/CCT3/PDHX/RPL14/TMEM147/CCT5/PPA1/COX7C/SDHA/LGALS8/SNU13/NDUFB8/MARS1/AHSA1/CD59/NEDD8/HSPA5/HSP90AB1/PDHA1/NDUFB3/RSU1/CACYBP/DNAJA1/MPV17/RPL6/GTF2A2/CLIP3/DRAP1/RPL38/RPE/COPS5/UROS/EIF2B1/CLIC2/PFDN2/HSPH1/UTP18/TOP1/PSMC2/ECH1/GLUL/CCT4/NSFL1C/HADH/CKS2/RAD51C/EIF2B3/ARF3/AP3S1/RB1CC1/USP15/MXD1/HSP90AA1/TMOD1/DNAJC8/CUL2/C9orf16/CDK7/S…
ELVIDGE_HIF1A_AND_HIF2A_TARGETS_DN	105	-0.674752	-2.16078	7.83825e-10	2.10957e-08	1.35285e-08	3571	tags=53%, list=8%, signal=49%	P4HA2/ANGPTL4/AHNAK2/LOXL2/RRAGD/SOX9/S100A4/HILPDA/ATXN1/ANKZF1/FYN/GYS1/EGFR/IGFBP3/LOXL1/STC1/HEY1/GBE1/CA9/ANG/PLIN2/YEATS2/NOL3/CAVIN1/PDGFB/PGAP1/PGK1/ZNF292/EGR1/PLAUR/VEGFA/PGM1/WSB1/MAGED4B/RNASE4/PAM/SPAG4/SLC2A1/FAM13A/ALDOC/CSRP2/P4HA1/CAV1/OBSL1/TMEM45A/GJA1/ENO2/EGLN3/ERO1A/PDK1/PPFIA4/DSC2/EGLN1/NDRG1/LOX/ZNF395
REACTOME_HIV_INFECTION	231	0.573208	1.93917	8.5855e-10	2.29748e-08	1.47335e-08	5505	tags=48%, list=13%, signal=42%	SLC25A6/PSME2/SLC25A5/PSMD8/AP1S1/SLC25A4/AP2A1/ATP6V1H/TSG101/ELMO1/POLR2F/ELOB/RPS27A/POLR2E/PSMA7/POLR2L/AP1B1/AP1M2/AP2S1/PSME1/PSMD1/PSMB5/PSMB6/PSMD9/CCNH/PSMB10/PSMD14/PSMC4/SUPT4H1/GTF2A2/TAF10/PSMA6/PSMD2/PSMD7/ELOC/AP2M1/TAF4B/CHMP2A/SKP1/NPM1/PSMA3/UBA52/PSMB4/KPNA1/TAF9/PSMD13/RANGAP1/UBB/PSMB1/PSMA5/POLR2K/PSMD4/PSMC2/PSMA4/PSMB7/GTF2E2/MVB12B/PSMA2/NEDD4L/GTF2H1/POLR2I/POLR2J/PSMD6/…
SCHAEFFER_PROSTATE_DEVELOPMENT_48HR_DN	404	-0.472763	-1.77075	9.30768e-10	2.47658e-08	1.58821e-08	4895	tags=36%, list=11%, signal=32%	FOXP1/FAM171B/ISOC1/SHISA2/PDE1B/IRF2BPL/LHFPL3/MYB/FAM131A/ABCC9/GPRASP1/NRROS/RHBDL3/TRPC6/MS4A7/ZNF536/DEF6/GPM6B/JUND/TGFB1I1/MMP16/CD83/MIF/KDM6B/CENPE/CAMKK2/CNTN1/BTD/SYNPO2/STARD9/P4HA2/IRF1/PCDH19/NRP2/LMO3/AHR/CBFA2T2/NR4A2/TIAM2/AVPR1A/PROX1/DDX3X/ERC1/XIST/RBMS3/SLC16A3/DPP10/KRT17/NUAK1/PTHLH/MMP10/SKIDA1/SRGAP1/PDE1A/BCAT1/TRIL/RND3/GABRB2/KLF12/NEGR1/FOXJ3/RAB3B/NTNG1/CTTNBP2/SLC1A…
REACTOME_ABC_TRANSPORTER_DISORDERS	77	0.741958	2.19398	1.0152e-09	2.67088e-08	1.7128e-08	4493	tags=62%, list=10%, signal=56%	PSME2/PSMD8/ABCA12/ABCC2/RPS27A/PSMA7/ERLEC1/PSME1/PSMD1/PSMB5/PSMB6/PSMD9/PSMB10/PSMD14/PSMC4/ABCB6/PSMA6/PSMD2/PSMD7/PSMA3/UBA52/PSMB4/PSMD13/UBB/PSMB1/PSMA5/PSMD4/PSMC2/PSMA4/PSMB7/PSMA2/PSMD6/PSMB3/VCP/OS9/PSME3/PSMC3/PSMC1/PSMB2/PSMF1/PSMD11/PSMC6/PSMC5/SEM1/PSMD12/PSMB8/PSMD3/ABCD1
SCHLOSSER_MYC_TARGETS_REPRESSED_BY_SERUM	160	0.621974	2.02406	1.01118e-09	2.67088e-08	1.7128e-08	6029	tags=55%, list=14%, signal=48%	LYPLA1/IDH3A/HSPD1/TRIAP1/IARS2/EI24/FH/NOP16/OAT/CYCS/SARS1/YARS1/CCT5/HSPE1/ZMPSTE24/LDHB/GARS1/BTF3/PNO1/EEF1E1/ITPA/TXN/TOMM20/RABGGTB/PSMD14/ALG8/PRMT3/SLC3A2/CCT8/PSMG1/MRPL3/EIF2S1/PGAM1/SRSF8/TOMM70/FASTKD2/FAM120A/PMPCB/IARS1/SLC39A6/RMND5A/EIF4E/ATP5F1C/SSB/ADSS2/C12orf29/FBXO9/AFG3L2/SERBP1/ZNF330/SSBP1/EIF3A/PUM3/CEBPB/ATXN10/GNL2/XPOT/HIRA/DDX1/DCTD/NOLC1/EPRS1/NDUFB6/COPS2/ZC3H15/AA…
REACTOME_HEDGEHOG_LIGAND_BIOGENESIS	65	0.76694	2.18098	1.12006e-09	2.9303e-08	1.87917e-08	4846	tags=74%, list=11%, signal=66%	PSME2/PSMD8/RPS27A/PSMA7/ERLEC1/PSME1/PSMD1/PSMB5/PSMB6/PSMD9/GPC5/PSMB10/PSMD14/PSMC4/PSMA6/PSMD2/PSMD7/PSMA3/UBA52/PSMB4/PSMD13/UBB/PSMB1/PSMA5/PSMD4/PSMC2/PSMA4/PSMB7/PSMA2/PSMD6/PSMB3/VCP/OS9/PSME3/PSMC3/PSMC1/PSMB2/PSMF1/PSMD11/DISP2/PSMC6/PSMC5/SEM1/PSMD12/PSMB8/PSMD3/SYVN1/PSMB9
KIM_WT1_TARGETS_UP	217	-0.554512	-1.9631	1.19969e-09	3.12119e-08	2.00159e-08	5640	tags=46%, list=13%, signal=40%	SH2B3/BAZ2A/CHD7/BHLHE40/ETS1/CYP51A1/ARID5B/NPC1/RGPD5/FOXD1/TNFRSF12A/CDC42SE1/APP/CCL2/CARD10/CSPG4/SH2B2/ZMIZ1/ACTG1/RCOR1/FN3KRP/CD83/OTUD4/KDM6B/IER2/NFKB1/CDK17/ACTB/TNFAIP1/IGF2/DOK5/WT1/DNAJB5/CERS6/SOX9/KRT17/MYC/PTHLH/HMGCS1/RND3/BBS4/SOWAHC/SRSF5/CCNE2/RGS4/SPRED2/SF1/PRKCI/TET3/SFN/NAB1/NFKB2/PDLIM4/EPHA2/MYH10/HNRNPL/SRSF6/SPRY2/MAFF/MSH6/GLS/ENC1/MAPK1IP1L/CBFB/IMPA1/ZNF365/IL4R/WW…
REACTOME_COLLAGEN_FORMATION	90	-0.689922	-2.15482	1.37669e-09	3.5619e-08	2.28421e-08	4396	tags=46%, list=10%, signal=41%	ADAMTS3/COL9A1/COL4A3/COL4A4/ITGB4/P4HA2/LOXL2/COL27A1/COLGALT1/PXDN/COL5A1/COL4A6/LOXL1/ITGA6/COL1A2/CTSS/COL1A1/COL14A1/COL7A1/LAMC2/COL5A2/PLOD1/COL18A1/COL16A1/P3H3/COL3A1/P3H1/COL2A1/COL19A1/CTSV/LAMA3/COL4A2/COL11A1/SERPINH1/P4HA1/COL12A1/COL4A1/PLOD2/LOX/CRTAP/COL9A2
SMIRNOV_RESPONSE_TO_IR_6HR_DN	113	-0.650568	-2.10077	1.43312e-09	3.68753e-08	2.36477e-08	4035	tags=49%, list=9%, signal=44%	UBE2S/TNF/GGA2/HK2/CENPE/IER2/NR4A2/RGS1/RNASET2/SLC16A3/CACNA1A/MYC/HILPDA/LPCAT4/CDC20/HMMR/H1-10/HEY1/VGLL4/PSRC1/TRAF5/INSIG1/MAFF/CCNB1/AURKA/PLK1/HHEX/NEK2/DEPDC1/EGR1/ITGA4/CD300A/SLC2A3/KIF20A/CENPA/KIF14/CENPF/TRIB1/BUB1/LDLR/CDCA3/P4HA1/DLGAP5/TPX2/ATP2A3/UBE2C/TMEM45A/ARHGAP11A/EGLN3/PDK1/SCD/ASPM/EGLN1/KCTD12/ZNF395
PETROVA_PROX1_TARGETS_UP	25	-0.889634	-2.26062	1.48506e-09	3.80028e-08	2.43708e-08	2318	tags=76%, list=5%, signal=72%	CCNE2/FLT4/BTBD3/GINS1/DMTN/GPRC5B/MYBL2/MCM6/SMC4/NDC80/CSRP2/CDK1/TK1/UBE2C/HMGB2/DSP/TOP2A/BUB1B/CDKN1C
CONCANNON_APOPTOSIS_BY_EPOXOMICIN_UP	236	0.563734	1.90772	1.57536e-09	4.00947e-08	2.57123e-08	4975	tags=40%, list=11%, signal=35%	NQO1/INPP5D/CDKN1A/AKR1C1/ACTA2/PRKCZ/GDF15/TSPYL2/KITLG/TUBA4A/ME1/PLAAT3/FAS/TGFBR2/TTC39A/GDF7/KLHL21/MAP1LC3B/TOM1/GSR/CAMK2G/CYB5R1/LGALS8/HSPA4L/NEAT1/LAMP3/BBC3/SPP1/HSPA9/HSPA4/AKR1C3/WARS1/ACADVL/PSMD1/BLVRB/BSCL2/SQSTM1/MDM2/MAP1B/CLTB/TNFSF9/ABLIM3/SLC3A2/CALCA/TNFRSF10B/IFRD1/DDIT3/BAK1/SYNJ2/PSMD13/ADRM1/GLRX3/PSMA5/DNAJB2/HSPH1/ABHD3/YKT6/NSFL1C/SUSD5/DAP3/NQO2/NACC2/UBE2H/MXD1/PCYT…
ELVIDGE_HYPOXIA_BY_DMOG_UP	132	-0.625592	-2.07318	1.6536e-09	4.18583e-08	2.68433e-08	3861	tags=55%, list=9%, signal=50%	FAM162A/VEGFC/KLHL24/HK2/ASPH/P4HA2/ANGPTL4/STC2/AHNAK2/LOXL2/RRAGD/SOX9/SPRY1/RLF/S100A4/DTNA/HILPDA/ARTN/DAAM1/ATXN1/FYN/GYS1/EGFR/IGFBP3/STC1/HEY1/MET/ISG20/MAFF/PIM1/GBE1/CA9/ANG/SAT1/TNFAIP8/YEATS2/PFKP/YPEL1/INHA/TMEFF1/PGK1/ZNF292/CSGALNACT1/EGR1/PLAUR/VEGFA/PGM1/WSB1/RNASE4/PAM/SPAG4/SLC2A1/FAM13A/ALDOC/CSRP2/P4HA1/CAV1/OBSL1/OLFML2A/TMEM45A/GJA1/ENO2/EGLN3/ERO1A/CADM1/PDK1/PPFIA4/DSC2/EG…
MENSE_HYPOXIA_UP	96	-0.675911	-2.15185	2.41225e-09	6.07343e-08	3.89483e-08	4970	tags=53%, list=11%, signal=47%	FOXD1/PFKFB3/GPRIN3/FAM162A/WDR54/KLHL24/HK2/ASPH/STK4/MED6/CLK3/P4HA2/ANGPTL4/STC2/ANKRD37/CDK19/DIDO1/FAM110C/HILPDA/LARP6/OSMR/PPP1R15A/INSIG1/MAFF/GBE1/ANG/TMEM65/PLIN2/LCORL/NOL3/C4orf3/PGK1/VEGFA/RNASE4/SPAG4/SLC2A3/FAM13A/ALDOC/CEBPD/P4HA1/FUT11/ENO2/ERO1A/PFKFB4/PDK1/PPFIA4/SCD/EGLN1/NDRG1/PLOD2/LOX
KAAB_HEART_ATRIUM_VS_VENTRICLE_DN	261	0.556398	1.89966	3.02678e-09	7.57989e-08	4.8609e-08	4064	tags=45%, list=9%, signal=41%	PDK4/ITGA9/PINK1/ACAT1/SLC25A20/ATP5F1A/TUBA4A/H2BC21/VDAC1/AIMP2/C1QBP/ECHS1/APOD/ISCU/COX5A/FH/PDHX/CYC1/COX8A/HADHA/NDUFS1/CYB5A/AIFM1/POLR2F/NDUFS7/UQCRQ/SDHB/CYB5R1/COQ9/UQCRFS1/SDHA/MCCC2/ACAA1/BCAT2/LDHB/AMD1/H2BC5/TSFM/BUD23/RCAN2/GOT2/HSPA9/BDH1/CCT7/OGDH/P2RY2/SDHD/H1-2/NDUFV2/ACADVL/DLD/OXA1L/IPO13/PSMB6/DECR1/PRDX3/MRPL33/MYOM2/BDNF/COX17/NDUFS6/CAPN2/PYGB/STIM1/CCND2/MAPKAPK3/HYAL1/S…
MORI_PRE_BI_LYMPHOCYTE_UP	81	-0.7035	-2.17835	3.88751e-09	9.68362e-08	6.21e-08	2562	tags=53%, list=6%, signal=50%	HMGN2/SMARCC1/CDC20/GRB7/RAD51/SOCS2/MCM7/KPNA2/ENPEP/AURKA/RRM1/DTL/NUCKS1/MCM2/RRM2/CDCA7/H2AZ2/RACGAP1/STMN1/MCM6/CDCA5/NCAPH/SMC4/NDC80/TUBA1A/CKS1B/TTK/H2AX/MKI67/CCNB2/PHGDH/CDK1/MELK/LMNB1/CDCA3/KIF4A/ANP32E/TUBA1B/UBE2C/PRC1/TOP2A/HJURP/TUBB
WILCOX_RESPONSE_TO_PROGESTERONE_UP	151	-0.602327	-2.03586	4.39419e-09	1.08878e-07	6.98225e-08	4256	tags=41%, list=10%, signal=37%	ARHGEF3/KLHL24/KCNJ16/MUC5B/MDM1/MTF2/LIPG/WDHD1/PTHLH/IFNAR2/SGK3/ADGRG6/HMGCS1/XRCC4/NUP160/TYMS/RIF1/CDC20/HMMR/CENPN/PPL/CEP162/INSIG1/ZNF268/CCNB1/ABCG1/CEP57/CDC6/CDKN2C/CENPQ/RRM2/SHCBP1/PBK/FANCI/SEC14L1/NCAPG/PCLAF/ETV1/SAMD9/KLF5/NDC80/KIF20A/CENPU/CEP55/SMC2/CCNB2/KIAA0895/CENPF/CDK1/LDLR/TK1/KIF4A/DLGAP5/FADS1/HMGB2/PRC1/NUSAP1/TOP2A/HJURP/FADS2/SCD/ASPM
REACTOME_M_PHASE	412	-0.462822	-1.73234	4.84246e-09	1.19354e-07	7.65403e-08	4251	tags=35%, list=10%, signal=32%	ARPP19/CEP63/CENPM/DYNC1LI2/ESPL1/RB1/AKAP9/HDAC8/CENPE/H2AC14/CENPL/UBE2I/NUP85/NEDD1/HAUS2/MZT1/MIS12/CHMP4C/B9D2/STAG2/NUP37/SKA2/CKAP5/TUBB2B/ODF2/LEMD3/TUBA1C/H2AZ1/NIPBL/CLASP1/ZWILCH/NUP160/ZW10/VRK1/CEP164/TAOK1/FGFR1OP/PCNT/SET/SPDL1/PPP2R5B/CDC20/CENPC/HAUS1/CDC23/ITGB3BP/CCP110/NUP58/CDK5RAP2/HAUS6/CENPN/UBE2D1/WAPL/SFI1/CEP41/CEP250/VRK2/HAUS3/TUBB1/SMC3/RAD21/CENPO/UBC/CCNB1/NCAPD3/C…
FISCHER_G1_S_CELL_CYCLE	200	-0.558743	-1.95422	4.90227e-09	1.20196e-07	7.70801e-08	5749	tags=56%, list=13%, signal=49%	RBBP8/E2F1/TENM3/TTLL7/INSR/ARGLU1/TCEAL9/AP3M2/MRC2/POLE2/ARID5B/ZRANB2/FOSB/TMCC1/MYB/CDC25A/ACYP1/SVIP/TCIM/COL4A4/JUND/ADCY6/DCLRE1A/ASPH/UBR7/MDM1/GINS2/HELLS/YEATS4/PLCXD1/USP37/BBX/E2F8/PRIM1/ZBTB14/FEN1/WDHD1/EXO1/POLA2/SP1/PTGS2/RIMKLB/RECQL4/ANK3/MNX1/CCNE2/CHAF1B/TRIM45/DCLRE1B/RAD51/WDR76/MAGEL2/CLSPN/MSH6/C1GALT1/NASP/CDT1/BRCA1/CDC6/DUSP10/CHAF1A/E2F2/MSH2/FANCG/DTL/POLD3/CENPQ/REEP…
BILANGES_RAPAMYCIN_SENSITIVE_VIA_TSC1_AND_TSC2	70	0.740041	2.16064	4.93707e-09	1.20418e-07	7.72229e-08	3340	tags=70%, list=8%, signal=65%	ATP5F1A/SLC25A5/VDAC1/RPS28/RPL3/AHCY/NAA10/PSAT1/IMPDH2/EIF3K/RPL31/HSPA8/UQCRFS1/NME2/RPL36A/RPL10A/PPM1G/BTF3/CS/RPL36/RPS26/RPH3AL/BLVRB/TOMM20/POLR1C/CNIH1/PRDX3/TUBB2A/IGBP1/EIF3E/NSA2/EIF2S3/ACBD6/GYG1/RPS21/MRPL30/OLA1/SLC25A3/BGN/ATP6V1G2/TCP1/PAICS/CCT4/SSR4/GTPBP6/RPL35A/TSPAN15/RTRAF/AIMP1
KRIEG_KDM3A_TARGETS_NOT_HYPOXIA	199	0.580542	1.92148	5.49677e-09	1.32688e-07	8.50911e-08	4747	tags=42%, list=11%, signal=38%	RRM2B/SAA1/ACSL5/RPS19/PSME2/ALDH1A3/EML2/SEC11C/TTC39A/CYP1B1/AP1S1/NFS1/PAQR3/SLC46A3/ACOT7/TMEM9B/COX7C/VAMP8/SDSL/FKBP5/LGALS8/LYPLAL1/NEAT1/STAT1/POLR1D/PDP1/RPUSD3/DPH3/EIF2A/PFDN6/SAA2/PSMB10/ATP5MD/GABARAP/MIEN1/GALNT1/ATPAF1/RPE/STOML1/ZNHIT6/LRRC47/PRKAB2/EHD1/GRAMD2B/NDUFA12/COA7/PSMA4/ANKRD39/NUDT3/HACL1/EMG1/SLC25A12/CARD16/EIF2B3/HIBCH/NHEJ1/ATP6AP2/RABEPK/SMIM29/PDCD2L/NDUFA5/METTL…
WHITFIELD_CELL_CYCLE_S	153	-0.596226	-2.01881	5.48017e-09	1.32688e-07	8.50911e-08	4464	tags=53%, list=10%, signal=48%	PKMYT1/SVIP/CCDC84/GOLGA6L4/CENPM/EFHC1/DCUN1D3/KAT2B/HELLS/PRIM2/TTC31/CERS6/E2F8/FEN1/ZBED5/DEPDC7/ANKRD18A/EXO1/PHTF2/SP1/ADGRG6/NUP160/TYMS/DDIAS/SRSF5/TRIM45/ANKRD36C/RAD51/NAB1/ABCC5/KLHL23/SRSF10/INTS7/FANCA/CPLANE1/DCAF16/RRM1/BRCA1/DNA2/GOLGA8B/SLF2/DNAJB4/ZNF217/RSRC2/CENPQ/ASF1B/REEP1/SHTN1/COL7A1/BLM/ESCO2/CASP2/RRM2/CREBZF/CDC7/RAD51AP1/MCM8/UBE2T/EZH2/ADAM22/PHIP/SLC38A2/RFC4/ANKRD3…
WHITFIELD_CELL_CYCLE_G1_S	132	-0.615064	-2.03829	6.1131e-09	1.46808e-07	9.41467e-08	4456	tags=48%, list=10%, signal=43%	CDC25A/ACYP1/KANK2/ADCY6/UBR7/MDM1/GINS2/OTULIN/PNN/PLCXD1/DMTF1/RMI2/DDX12P/RECQL4/MNX1/RAB23/CCNE2/CHAF1B/TRIM45/CDCA7L/NKTR/WDR76/ORC1/SPIN4/DENND11/CLSPN/DHFR2/NASP/GINS3/CDC6/CHAF1A/E2F2/TRA2A/AP4B1/MSH2/FANCG/UHRF1/DTL/POLD3/NPAT/MBOAT1/MCM2/GMNN/CASP2/CREBZF/CASP8AP2/TOPBP1/MAP2K6/MCM4/CDCA7/UNG/PASK/ATAD2/MCM6/ANKRD10/TCAF1/ZNF367/IVNS1ABP/ADAMTS1/MCM5/FAM111B/BARD1/SKP2
LINDGREN_BLADDER_CANCER_CLUSTER_2B	381	-0.468544	-1.74861	6.31274e-09	1.50829e-07	9.67253e-08	4359	tags=31%, list=10%, signal=28%	MT1E/EMC10/CPXM1/GPM6B/ANXA6/HLA-E/SELE/JAK3/SLC2A4RG/MCAM/IER2/PRICKLE1/SERPING1/SDC3/NRP2/GRK5/PITX2/BRPF1/DNAJB5/NUAK1/FAM200B/SPRY1/YWHAZ/NR2F1/IL1A/RNF41/ABI3BP/PDE1A/PHTF2/RGS5/HMGCS1/RND3/PROS1/TRAF1/CRISPLD2/PXDN/TNC/SH3KBP1/FYN/ST6GAL1/SLC43A3/RBP5/SREBF1/TBC1D8/SYN3/AFF1/SLC16A2/COL1A2/SOCS2/GUCY1A1/PPP1R18/ISG20/CLIC4/MT1X/AMOTL2/TOX/MALT1/DKK3/NUMA1/PELI1/TCF4/PCP4/ANGPTL2/MMP2/TNFAIP…
KIM_WT1_TARGETS_DN	468	-0.444554	-1.6787	6.67957e-09	1.58784e-07	1.01826e-07	4683	tags=35%, list=11%, signal=32%	TAF5/KHDC4/HNRNPC/FLRT2/FNBP4/CPOX/PMAIP1/GEMIN2/RIN2/ACYP1/FAAP24/ESPL1/CUL4A/FGD6/DBF4/DLEU1/SHH/SLC33A1/EFHC1/NET1/CENPE/LSM2/GTF2I/NCOA2/MGAM/MDM1/FAM149B1/STAM/TGIF1/LAMB1/CEP350/NBN/GRK5/PRIM2/ZFP64/SMURF2/PITX2/SNRPA1/ZMYM1/SOAT1/CTCF/RDH11/RSBN1/PLK2/NUAK1/ZBED5/GOLPH3L/CRKL/BRD8/SGK3/ZNF302/ATP10D/BICRAL/ARL6IP1/FUBP1/DAAM1/RBM25/CDC20/PTK6/CENPC/ZBTB20/PCNX4/NFYB/SIRT1/MAP4K5/ZCCHC8/RAP…
CHEN_HOXA5_TARGETS_9HR_UP	223	-0.54444	-1.92815	6.97782e-09	1.65036e-07	1.05836e-07	6619	tags=52%, list=15%, signal=44%	GPATCH2/ZNF20/TSC22D2/DUSP8/UIMC1/SUPT20H/BIRC2/ODR4/RCAN1/CEP76/TBC1D31/KRCC1/ZNF432/KDM3A/ZNF331/INTS6/ZNF274/RBM5/ZNF557/NCOA3/BIRC3/RYBP/ZNF155/EIF5/ATAD2B/SMCHD1/DUSP6/FOSB/STRN3/BTN2A1/CROCCP2/ZNF451/KHDC4/PRPF38B/FNBP4/FAM53C/PMAIP1/ZNF267/CNOT4/SLTM/FAM13B/TDG/CHD9/THUMPD2/TLK2/KMT5B/IER2/CEBPG/ZNF426/HLX/CDK17/RIPK2/PTBP2/WAC/SETDB1/STC2/RIC8B/PPP1R12A/ZNF165/EDRF1/PNRC2/CNOT2/DCLRE1C/PI…
REACTOME_FCERI_MEDIATED_NF_KB_ACTIVATION	91	0.699452	2.1384	7.4886e-09	1.76227e-07	1.13012e-07	4432	tags=53%, list=10%, signal=47%	PSME2/PSMD8/RPS27A/PSMA7/PDPK1/PSME1/PSMD1/PSMB5/PSMB6/PSMD9/PSMB10/PSMD14/PSMC4/PSMA6/PSMD2/PSMD7/SKP1/PSMA3/UBA52/PSMB4/CDC34/PSMD13/UBB/PSMB1/PSMA5/PSMD4/PSMC2/PSMA4/PSMB7/PSMA2/PSMD6/PSMB3/PSME3/UBE2V1/PSMC3/PSMC1/PSMB2/PSMF1/PSMD11/PSMC6/TAB3/CHUK/PSMC5/SEM1/CUL1/PSMD12/PSMB8/PSMD3
WANG_TUMOR_INVASIVENESS_UP	383	0.499853	1.75261	8.53245e-09	1.99787e-07	1.28121e-07	4280	tags=42%, list=10%, signal=38%	HIGD1A/RPS5/ATP5F1A/TKT/KLF9/RPL13A/HSPD1/RPL7/TGFBI/RPL28/PAQR7/MPDU1/ATP1A1/RPS6/MAP1LC3B/CCT3/RPL18A/CAMK2G/COX8A/CYCS/RPS16/RPL14/RPL8/VDAC2/PC/CCT5/RPLP0/HSPE1/RPL27A/COX7C/HSPA8/WDR3/CLTA/ATP5PB/SDHA/RPS14/RPL27/RPS3/RPL32/ATP5PD/RPL19/GTF3A/AMD1/PSMA7/RPS8/COX4I1/PABPC1/NDUFB8/EIF3H/RPL35/HEBP1/RAB7A/STAT1/RPS7/HSPA4/EIF5B/RPS15A/PIGF/POLR1D/RPS20/RPS11/NEDD8/ABCD3/TOMM20/POLR1C/HSPA5/PXK/…
REACTOME_NEGATIVE_REGULATION_OF_NOTCH4_SIGNALING	54	0.782786	2.16293	1.03356e-08	2.40805e-07	1.54426e-07	4432	tags=80%, list=10%, signal=72%	PSME2/PSMD8/RPS27A/PSMA7/PSME1/PSMD1/PSMB5/PSMB6/PSMD9/PSMB10/PSMD14/PSMC4/PSMA6/PSMD2/PSMD7/SKP1/PSMA3/UBA52/PSMB4/PSMD13/UBB/PSMB1/PSMA5/PSMD4/PSMC2/PSMA4/PSMB7/PSMA2/PSMD6/PSMB3/PSME3/PSMC3/PSMC1/PSMB2/PSMF1/PSMD11/PSMC6/PSMC5/SEM1/CUL1/PSMD12/PSMB8/PSMD3
FINETTI_BREAST_CANCER_KINOME_RED	16	-0.931986	-2.11599	1.09271e-08	2.53326e-07	1.62455e-07	2529	tags=94%, list=6%, signal=88%	VRK1/AURKA/PLK1/NEK2/CDC7/PBK/MASTL/TTK/CDK1/CHEK1/BUB1/PLK4/MELK/AURKB/BUB1B
OSMAN_BLADDER_CANCER_DN	413	0.49018	1.73473	1.1702e-08	2.69953e-07	1.73118e-07	4800	tags=37%, list=11%, signal=33%	H2AC6/RPS5/ERGIC1/RPL4/PDCD4/H2BC21/SLC7A6/RPL12/RPSA/RPL13A/RPL7A/SCAP/RPL3/MRPS25/TGFBR2/RPL28/RPS18/NINJ1/EEF1G/GAS5/RPS6/NAA10/DMAC1/RPS10/MPRIP/RPL23A/RPL18A/RPS16/SEPTIN6/RPL14/RPS24/RPS13/CYB5A/RPLP0/RPL13/CHST11/RPS3A/RPS3/RPL29/RPL32/RPS27/RPS17/RPL19/RPL36A/VWA8/RPL10A/RPL35/AHCYL1/MTCH1/RPL15/RPS7/H1-2/PPIF/EIF5B/MARS1/PDCD4-AS1/SSU72/RPL36/RPS25/EEF1B2/H4C8/RPS20/SCFD2/RPS11/TNFAIP2/M…
REACTOME_FORMATION_OF_ATP_BY_CHEMIOSMOTIC_COUPLING	18	0.921363	2.11552	1.18607e-08	2.70946e-07	1.73754e-07	2292	tags=89%, list=5%, signal=84%	ATP5F1A/ATP5F1B/ATP5F1D/MT-ATP6/ATP5PB/ATP5PF/ATP5PD/ATP5MC3/ATP5MC1/MT-ATP8/ATP5F1E/ATP5MG/ATP5ME/ATP5MF/ATP5PO/ATP5F1C
KAMMINGA_EZH2_TARGETS	41	-0.797399	-2.23542	1.18265e-08	2.70946e-07	1.73754e-07	3389	tags=68%, list=8%, signal=63%	SETDB1/PRIM1/H2AZ1/RFC1/KPNA2/AURKA/RRM1/XPO1/MAD2L1/NEK2/MCM2/GMNN/RBL1/ECT2/TOPBP1/MCM3/MCM4/CDCA7/CDCA5/SMC4/MKI67/SMC2/CCNB2/TACC3/PRC1/NUSAP1/TOP2A/AURKB
REN_BOUND_BY_E2F	61	-0.741063	-2.19536	1.25046e-08	2.83436e-07	1.81765e-07	4089	tags=69%, list=9%, signal=62%	RB1/DBF4/CENPE/PRIM2/FEN1/POLA2/H2AZ1/POLD1/BRD2/RAD51/ORC1/RFC3/RRM1/CDC6/E2F2/MSH2/POLA1/MAD2L1/RBL1/HLTF/MCM3/CBX5/RFC4/UNG/MCM6/RAD54L/SMC4/NDC80/CENPA/TTK/H2AX/SMC2/MCM5/CDK1/CHEK1/CDK2/TK1/PTTG1/BARD1/CCNA2/TOP2A/HMGB1
ODONNELL_TARGETS_OF_MYC_AND_TFRC_DN	47	-0.775799	-2.22035	1.25286e-08	2.83436e-07	1.81765e-07	2338	tags=64%, list=5%, signal=60%	HELLS/FAM72C/CDC20/TMEM107/BRCA2/CCNB1/AURKA/CDC6/DNA2/CHAF1A/SPC25/FUS/DEPDC1/DEPDC1B/MYBL2/C4orf46/ERCC6L/CKS1B/CENPF/CDK1/BIRC5/PLK4/FOXM1/CCNA2/ARHGAP11A/TOP2A/AURKB/NSD2/BUB1B/SCD
RIGGI_EWING_SARCOMA_PROGENITOR_DN	192	-0.555402	-1.93196	1.30392e-08	2.9357e-07	1.88263e-07	3588	tags=34%, list=8%, signal=31%	BACE1/SERPING1/PTN/NRP2/STC2/IGF2/DEPDC7/SRGAP1/PDE1A/TGFBR3/PDE4B/SFR1/GNG2/EGFR/STC1/PPL/MELTF/IFT80/KCNJ15/TRIOBP/TANC2/RAB27B/SCARA3/CRYBG1/ABHD2/GATA6/OSR1/COL14A1/ARNTL2/LXN/DEPDC1/RRM2/CSGALNACT1/SHCBP1/PBK/VEPH1/CXCL6/C1R/MOXD1/PCLAF/ETV1/CCN4/FAM83D/CLGN/CEP55/GPSM2/BIRC5/ANLN/CDCA3/DLGAP5/TSHZ1/WLS/PRC1/NUSAP1/NREP/TNFRSF19/TOP2A/PDK1/VCAN/BUB1B/ASPM/PLCB1/ZNF395/FBLN1/DPYSL3
REACTOME_UCH_PROTEINASES	101	0.67721	2.08369	1.33348e-08	2.98789e-07	1.9161e-07	4862	tags=57%, list=11%, signal=51%	H2AC6/PSME2/TGFBR2/PSMD8/RPS27A/UCHL3/PSMA7/PSME1/PSMD1/PSMB5/NEDD8/PSMB6/PSMD9/PSMB10/PSMD14/PSMC4/H2AC19/PSMA6/PSMD2/PSMD7/PSMA3/UBA52/PSMB4/PSMD13/ADRM1/UBB/PSMB1/PSMA5/PSMD4/PSMC2/PSMA4/PSMB7/PSMA2/PSMD6/PSMB3/PSME3/USP15/PSMC3/PSMC1/PSMB2/PSMF1/PSMD11/PSMC6/H2AC18/INO80B/RUVBL1/H2AC15/H2AC13/PSMC5/SEM1/PSMD12/PSMB8/PSMD3/H2AC11/ACTR5/H2AC8/PSMB9/INO80C
BENPORATH_PROLIFERATION	145	-0.600024	-2.01362	1.35235e-08	3.01575e-07	1.93397e-07	4144	tags=51%, list=10%, signal=47%	CENPM/DBF4/CENPE/CEBPG/CDKN3/PROSER1/PRIM2/RRAGD/RBM8A/WDR26/HDAC2/HSPA14/TMEM14A/EXO1/H2AZ1/C1orf112/TYMS/CHAF1B/RAD51/CENPN/PARP1/MTFR2/TP53BP2/FANCA/KPNA2/GINS3/AURKA/CDT1/APOBEC3B/MSH2/DTL/MAD2L1/NEK2/MCM2/NUF2/RRM2/PURB/PBK/LBR/GNB4/NCAPG/MCM3/RAD51AP1/CDCA7/H2AZ2/UBE2T/EZH2/MYBL2/RFC4/RACGAP1/STMN1/ATAD2/CDCA5/RAD54L/NDC80/CENPA/CENPU/CTSV/CKS1B/TTK/SPAG5/CCNB2/CENPF/GPSM2/CDK1/BIRC5/BUB1/N…
ELVIDGE_HIF1A_TARGETS_UP	67	0.73751	2.11559	1.36497e-08	3.02945e-07	1.94276e-07	5327	tags=65%, list=12%, signal=57%	IDH3A/WDR77/SLC7A6/RRS1/CCND3/CCDC86/MRPS12/SRM/AMD1/DOLK/PNO1/HSPA4/SLC35C1/RPP40/RRP12/DNAJA1/SLC35B1/GYG1/JAK2/STX3/KPNA1/GULP1/HSPH1/CORO1A/TMEM33/TOR3A/PSME3/LARS2/CTPS1/RFK/LSG1/PSEN2/OSTM1/ABCF2/SLC29A1/CHUK/ABCF2/RPP25/FASTKD5/POLR3K/IDE/SLC25A44/RMC1/AREL1
CROONQUIST_NRAS_VS_STROMAL_STIMULATION_DN	97	-0.660272	-2.10506	1.49917e-08	3.3116e-07	2.12369e-07	3818	tags=58%, list=9%, signal=53%	CENPE/IER2/CDKN3/LAMB1/NR4A2/SNRPA1/LUZP2/INPP5J/RECQL4/CDC20/IGFBP3/IL6/PPP1R15A/COL1A2/MCM7/PTP4A3/CCNB1/TOX/NASP/AURKA/CCNF/CDC6/APOBEC3B/KIF2C/MCM2/TROAP/IER3/MCM3/RAD51AP1/EZH2/STMN1/TRAIP/COL16A1/CDC45/CENPA/CKS1B/H2AX/DCLK1/MKI67/NFKBIA/CCNB2/SPARC/CDK1/FOXM1/NOTCH3/TK1/DLGAP5/PTTG1/TPX2/CCNA2/IGFBP7/UBE2C/GJA1/ARHGAP11A/AURKB/VCAN
GENTILE_UV_HIGH_DOSE_DN	288	-0.49103	-1.7909	1.68847e-08	3.71226e-07	2.38063e-07	5400	tags=44%, list=12%, signal=39%	TARDBP/BHLHE40/NCOA3/POLE2/ARID5B/PLPP3/RYBP/TUBGCP3/FOXD1/STRN3/HAS2/PLA2G6/ZNF623/TLK1/ZMIZ1/PMAIP1/UFL1/C2CD2/MTMR3/VEGFC/AUTS2/LSM14A/JUND/DKK1/TLK2/RIPK1/MAT2A/DUSP11/ASPH/LSM2/PHC2/UVRAG/STAM/PNN/PUM2/POGZ/TBL1X/DDX3X/SMURF2/SSH1/HMGXB4/EDRF1/PCGF3/CNOT2/THUMPD1/MBD2/CTDSP2/CRKL/LHFPL2/COIL/BRD8/PHTF2/RND3/SNRNP40/PUM1/FOXJ3/SNRNP35/ELF4/NFYB/TLE1/RAPGEF2/MORC3/ZFP36L2/CHTOP/BMPR1A/SPEN/ITG…
VECCHI_GASTRIC_CANCER_ADVANCED_VS_EARLY_UP	174	-0.567297	-1.95307	1.86318e-08	4.07723e-07	2.61468e-07	4595	tags=37%, list=11%, signal=33%	ANGPT2/GPC6/NOX4/AUTS2/AKT3/PIK3R5/FKBP14/PDE3A/MSR1/CMTM3/STC2/LPL/FBN1/EPHA4/NUAK1/BCAT1/NIPBL/SALL4/RIMKLB/SNX10/PDGFC/PGBD1/IGFBP3/CAV2/IL6/HEY1/COL1A2/MYH10/CTHRC1/GUCY1A1/RBMS1/MMP11/IGF2BP3/WWTR1/TRIM6/GNB4/COL5A2/SLC5A3/QKI/NID2/INHBA/MOXD1/CCN4/SLC2A3/ZNF532/CEP170/COL11A1/SPARC/HDGFL3/CCDC88A/AXL/SLIT2/TIAM1/COL12A1/COL4A1/CRISPLD1/TMEM45A/ARL4C/NREP/IL1RAP/VCAN/GPNMB/PLOD2/LOX/FSTL1
REACTOME_STABILIZATION_OF_P53	57	0.762246	2.11913	1.8845e-08	4.1047e-07	2.6323e-07	4432	tags=74%, list=10%, signal=66%	PSME2/PSMD8/RPS27A/PSMA7/PSME1/PSMD1/PSMB5/MDM2/PSMB6/PSMD9/PSMB10/PSMD14/PSMC4/PSMA6/PSMD2/PSMD7/PSMA3/UBA52/PSMB4/PSMD13/UBB/PSMB1/PSMA5/PSMD4/PSMC2/PSMA4/PSMB7/PSMA2/PSMD6/PSMB3/PSME3/PSMC3/PSMC1/PSMB2/PSMF1/PSMD11/PSMC6/PSMC5/SEM1/PSMD12/PSMB8/PSMD3
REACTOME_TNFR2_NON_CANONICAL_NF_KB_PATHWAY	100	0.671968	2.06351	1.92491e-08	4.17332e-07	2.67631e-07	4432	tags=52%, list=10%, signal=47%	EDA2R/PSME2/PSMD8/RPS27A/TNFSF15/PSMA7/PSME1/PSMD1/PSMB5/PSMB6/PSMD9/TNFSF9/LTBR/PSMB10/PSMD14/PSMC4/PSMA6/PSMD2/PSMD7/SKP1/PSMA3/UBA52/PSMB4/PSMD13/UBB/PSMB1/CD70/PSMA5/PSMD4/PSMC2/PSMA4/PSMB7/PSMA2/PSMD6/UBE2M/TRAF3/PSMB3/PSME3/PSMC3/PSMC1/PSMB2/PSMF1/PSMD11/PSMC6/EDARADD/CHUK/PSMC5/SEM1/CUL1/PSMD12/PSMB8/PSMD3
REACTOME_DOWNSTREAM_SIGNALING_EVENTS_OF_B_CELL_RECEPTOR_BCR	81	0.708214	2.10789	1.96019e-08	4.21082e-07	2.70035e-07	4432	tags=60%, list=10%, signal=54%	PSME2/NFKBIB/PSMD8/FKBP1A/CALM1/RPS27A/PSMA7/PSME1/PSMD1/PSMB5/PSMB6/PSMD9/PSMB10/PSMD14/PSMC4/PSMA6/PSMD2/PSMD7/SKP1/PSMA3/UBA52/PSMB4/PSMD13/UBB/PSMB1/PSMA5/PSMD4/PSMC2/PSMA4/PSMB7/PSMA2/PSMD6/PSMB3/PSME3/PSMC3/HRAS/PSMC1/PSMB2/PSMF1/PSMD11/PSMC6/CHUK/PSMC5/PPIA/SEM1/CUL1/PSMD12/PSMB8/PSMD3
LIM_MAMMARY_STEM_CELL_DN	416	0.48248	1.70884	1.95959e-08	4.21082e-07	2.70035e-07	4974	tags=37%, list=11%, signal=33%	RRM2B/CLDN8/HTATIP2/BATF/PRKCZ/TMEM54/ATP6V1E1/CPT2/KLHL5/CCNG1/ALDH1A3/SLC39A11/TMPRSS2/NAT1/LTF/SULF2/VIPR1/H2AJ/SLC46A3/PKN1/SMIM1/ACY1/MVP/TSG101/SNX8/TST/TMEM9B/SDSL/LYPLAL1/MLPH/MCCC2/PRLR/TM7SF2/ARRDC4/GIPC1/HAGH/BDH1/RER1/AP1M2/ARMT1/PSME1/TNFAIP2/ZNF524/TMED3/MARVELD3/STARD10/GALE/TMEM125/SERINC3/PPM1H/ABHD11/PLPP2/THUMPD3/ALG8/ZNF750/ACOT8/CIB1/SNAP29/ENPP4/PGD/ALAD/NDUFA7/RMDN3/SPINT1/…
FARMER_BREAST_CANCER_CLUSTER_2	33	-0.820652	-2.20249	1.98738e-08	4.24973e-07	2.7253e-07	1182	tags=70%, list=3%, signal=68%	MAD2L1/NEK2/NCAPG/MCM4/ATAD2/NDC80/KIF20A/CENPA/CEP55/CCNB2/BUB1/MELK/RAD54B/KIF4A/KIF15/PTTG1/TPX2/CCNA2/PRC1/NUSAP1/BUB1B/ASPM/KIF11
LY_AGING_MIDDLE_DN	16	-0.927047	-2.10477	2.08287e-08	4.43367e-07	2.84326e-07	2626	tags=94%, list=6%, signal=88%	PTGS2/HMGN2/CDC20/CCNB1/CCNF/PLK1/KIF2C/MYBL2/CENPA/H2AX/CENPF/FOXM1/CCNA2/UBE2C/KIF11
REACTOME_SIGNALING_BY_THE_B_CELL_RECEPTOR_BCR	120	0.644106	2.03255	2.16415e-08	4.58584e-07	2.94085e-07	5455	tags=51%, list=13%, signal=45%	PSME2/NFKBIB/PSMD8/FKBP1A/CALM1/RPS27A/PSMA7/AHCYL1/PSME1/PSMD1/PSMB5/PSMB6/PSMD9/PSMB10/PSMD14/PSMC4/PIK3CD/STIM1/GRB2/PSMA6/PSMD2/PSMD7/SKP1/PSMA3/UBA52/PSMB4/PSMD13/UBB/PSMB1/PSMA5/PSMD4/PSMC2/PSMA4/PSMB7/PSMA2/ITPR2/PSMD6/PSMB3/PSME3/PSMC3/HRAS/PSMC1/PIK3AP1/PSMB2/PSMF1/PSMD11/PSMC6/CHUK/PSMC5/PPIA/SEM1/CUL1/PSMD12/PSMB8/PSMD3/PSMB9/ORAI1/CD79A/PPP3R1/ORAI2/NFKBIE
REACTOME_COLLAGEN_DEGRADATION	64	-0.729741	-2.18717	2.20721e-08	4.65601e-07	2.98585e-07	4366	tags=45%, list=10%, signal=41%	COL9A1/COL4A3/COL4A4/ADAM10/CTSK/ADAM9/MMP10/COL5A1/COL4A6/PHYKPL/COL1A2/COL1A1/ADAM17/MMP11/MMP14/MMP2/COL14A1/COL7A1/COL5A2/COL18A1/COL16A1/COL3A1/COL2A1/COL19A1/COL4A2/COL11A1/COL12A1/COL4A1/COL9A2
LI_DCP2_BOUND_MRNA	85	0.696928	2.0954	2.25019e-08	4.7254e-07	3.03035e-07	4270	tags=66%, list=10%, signal=60%	RPS5/APRT/APEH/DCXR/RPSA/HSD17B10/ETFB/NAA10/CYC1/TST/HMOX2/MRPS12/NDUFS7/ELOB/MRPL12/NDUFA13/POLR2L/SCO2/TRAPPC2L/NDUFS8/AP2S1/ZNF593/MAP2K2/PPP1R7/EIF3G/EEF1D/NDUFB7/RUVBL2/DGCR6/WDR74/CHMP2A/NOP53/FAM50A/TACO1/MRTO4/DUS1L/PITRM1/MRPL23/EXOSC4/IDH3G/UQCRC1/NME6/EDF1/BID/NQO2/PSMC3/WDR45/FAHD2A/UBXN6/C12orf10/PSMC5/MRPS11/NOP56/ADA/CUEDC2/FLII
WEI_MIR34A_TARGETS	146	-0.591464	-1.98582	2.27571e-08	4.75766e-07	3.05104e-07	6071	tags=55%, list=14%, signal=47%	RCAN1/PDGFRA/ZCCHC24/TENT5A/BAZ2A/PMF1/ARGLU1/ZYG11B/SWAP70/PER2/LGR4/MYB/SNX15/PPP4R2/FIGN/BCL11B/B3GALNT1/KANK2/ARPP19/RECK/FKBP1B/KIT/DPYD/GLCE/SYT1/PIP5K1A/LRRC40/MLLT3/CYREN/PROX1/SLC38A1/SOX9/SYT4/GOLPH3L/NUMBL/S100PBP/HMGCS1/ANXA5/MTMR12/ACSL4/MTMR9/IPO9/HIP1/SMARCC1/TMEM184B/FAM167A/HACE1/CTNND2/STC1/CPSF6/CREB5/MDM4/CHRAC1/TMCC3/NPHP3/MAPK1IP1L/GINS3/TPD52/FLOT2/DNAJC24/MID1/HMGN4/CASP2/…
SCHUETZ_BREAST_CANCER_DUCTAL_INVASIVE_UP	344	-0.477899	-1.76318	2.49098e-08	5.18456e-07	3.32481e-07	3616	tags=29%, list=8%, signal=27%	IFFO1/SERPING1/NID1/LAMB1/MSR1/GRK5/RGS1/FBN1/AHNAK2/LOXL2/ZFPM2/SLC16A3/LYN/SLC9A6/NUAK1/S100A4/PROS1/ACSL4/ATP10D/CRISPLD2/FYN/RGS4/COL5A1/IGFBP3/MXRA7/ELK3/LOXL1/ROBO1/HEY1/SEC23A/PLXNC1/COL1A2/FBN2/CTSS/COL1A1/GLS/ENPEP/MMP11/TCF4/ARHGEF40/WWTR1/FERMT2/ANGPTL2/LAMC1/MMP2/CASP1/COL14A1/CAVIN1/TMEFF1/EMP3/FZD2/PLAUR/COL5A2/ADGRL4/LHFPL6/GPX7/QKI/NID2/INHBA/PTEN/C1R/PKD2/ETV1/PAM/COL16A1/CCN4/CF…
MARKEY_RB1_CHRONIC_LOF_UP	111	-0.63823	-2.06523	2.89567e-08	6.0002e-07	3.84786e-07	3007	tags=43%, list=7%, signal=40%	PRIM1/WDHD1/ZMYM4/PROS1/RAB3B/POLD1/CHAF1B/OSMR/NAB1/GATM/MCM7/RFC3/DNMT1/ANP32B/BRCA2/RSPO2/MAP3K4/CBFB/ANGPTL2/MSH2/UHRF1/POLA1/MAN2A1/DNAJC9/MCM2/CASP2/RBL1/SLK/EGR1/CDCA7/EZH2/NFIX/STMN1/NCAPH/SEMA3F/TPST1/CDK2/TK1/IDH2/CDCA4/FADS1/PLTP/GJA1/TOP2A/HJURP/VCAN/SCD/GPC3
WANG_CISPLATIN_RESPONSE_AND_XPC_UP	181	-0.560471	-1.93412	2.93166e-08	6.04801e-07	3.87852e-07	4513	tags=44%, list=10%, signal=40%	HSP90B1/G6PC/LIG1/TTLL5/STT3A/TFF1/AP1G2/ANKRD11/IGFBP2/MZT1/JARID2/TRIP13/YEATS4/LYN/MYC/FEN1/CLDN4/POLA2/ADGRG6/H2AZ1/HMGCS1/HNRNPA2B1/PROS1/PLEKHH1/MST1/POLD1/SMARCC1/RAD51/ITGB3BP/SLC43A3/SERPINA1/HEY1/DCK/ST6GALNAC2/PYCR1/VRK2/RNASEH2A/INSIG1/SULT1A4/COL1A1/MSH6/NCAPD3/AURKA/TF/RFC5/IGF2BP3/IGDCC3/FANCG/MAD2L1/FIGNL1/ZNF589/CDC7/MYEF2/LBR/DDX11/TMSB15A/CDH1/PCLAF/COL18A1/KIF22/ANXA3/MXD3/SMC…
REACTOME_ANTIGEN_PROCESSING_CROSS_PRESENTATION	98	0.667238	2.04052	3.54725e-08	7.25539e-07	4.6528e-07	4432	tags=52%, list=10%, signal=47%	PSME2/PSMD8/VAMP8/RPS27A/PSMA7/PSME1/PSMD1/PSMB5/PSMB6/PSMD9/PSMB10/PSMD14/PSMC4/PSMA6/STX4/PSMD2/PSMD7/PSMA3/UBA52/PSMB4/PSMD13/UBB/PSMB1/PSMA5/PSMD4/PSMC2/PSMA4/PSMB7/TAP1/PSMA2/PSMD6/PSMB3/PSME3/PSMC3/PSMC1/PSMB2/PSMF1/PSMD11/PSMC6/SEC61A1/VAMP3/HLA-B/CHUK/PSMC5/CYBA/SEM1/CALR/PSMD12/TLR1/PSMB8/PSMD3
REACTOME_SIGNALING_BY_RHO_GTPASES	449	-0.441371	-1.66165	3.5479e-08	7.25539e-07	4.6528e-07	4431	tags=34%, list=10%, signal=30%	MYH9/KIF5B/ACTG1/FAM13B/ARHGEF3/ROCK1/KDM1A/CENPM/DYNC1LI2/ARHGAP11B/SCAI/NET1/CENPE/YWHAH/H2AC14/CENPL/NCOA2/ARHGAP27/NUP85/ACTB/ARHGAP32/MIS12/NCF2/PPP1R12A/TIAM2/RTKN/PAK2/B9D2/DVL3/OCRL/NUP37/SKA2/DEPDC7/YWHAZ/CKAP5/TUBB2B/SRGAP1/ARHGEF10/TUBA1C/ARHGAP17/PKN2/H2AZ1/CLASP1/ABL1/FMNL1/ZWILCH/NUP160/ZW10/TAOK1/PPP1CB/SPDL1/DAAM1/PPP2R5B/CDC20/CENPC/ABR/SOS2/ITGB3BP/DIAPH3/MRTFA/WIPF2/ARHGAP33/SF…
SHEPARD_BMYB_MORPHOLINO_DN	200	-0.543694	-1.90158	3.71542e-08	7.56492e-07	4.85131e-07	3714	tags=38%, list=9%, signal=35%	HLX/GINS2/IGFBP2/HELLS/PPP1R3G/LIPG/RTKN/C17orf49/KRT17/PRIM1/SOX21/PDCL/NR2F1/ARHGEF10/SFRP1/HNRNPA2B1/CDC20/PARPBP/RGS4/CLDN1/PAXIP1/CDCA7L/HEY1/DCK/WDR76/COL1A2/MDM4/DNMT1/COL1A1/CCNB1/NSD1/NUMA1/CDC6/MSH2/SOX11/FBXO5/UHRF1/ASCL1/GINS1/MCM2/MDK/GMNN/GPSM1/MCM3/MCM4/PRR11/SCIN/CKAP2/PCDH18/MASTL/CDCA2/UCP2/CEBPD/NDE1/TTK/MKI67/KIF14/TACC3/MCM5/CDK1/DDX17/BIRC5/MELK/FOXM1/ANLN/CDK2/TK1/CDCA3/DLG…
HOELZEL_NF1_TARGETS_DN	117	-0.616782	-2.00899	4.18942e-08	8.49309e-07	5.44653e-07	5481	tags=45%, list=13%, signal=40%	PDPR/GATA3/C2orf68/ST8SIA2/WWOX/FAM124A/IGFBP5/FTX/FAT3/MYRF/MMP16/PRICKLE1/TGIF1/XIST/EFNA2/NR2F1/JDP2/AK5/WDR59/ARHGAP28/SCGN/SLC16A9/SATB1/CD200/PCDHB2/TNRC18/LRRN1/TMEM44/TES/PCDH18/SLITRK6/COL3A1/AASS/PRKD1/ADAMTS1/GREM2/BCL11A/FBXL7/MIAT/CP/CD24/GUCY1A2/SERPINF1/ROBO2/NREP/FREM1/ADAMTS5/TSPYL5/ADGRL3/FSTL1/ZNF395/FBLN1/MFAP2
DOANE_RESPONSE_TO_ANDROGEN_DN	241	-0.511323	-1.81825	4.56719e-08	9.21903e-07	5.91207e-07	5172	tags=46%, list=12%, signal=41%	SAP25/TMEM106C/ATAD2B/DUSP6/SLC25A14/IGFBP5/ARNT/ARVCF/TLK1/CPOX/CDC25A/ARHGEF3/PDE6D/ANXA6/AKAP9/TFF1/PCBP4/ZNF322/ASPH/MCAM/IGFBP2/SLC9A1/PTPN14/MTF2/HELLS/ERF/EFNB2/SNX7/EPHA4/E2F8/STAG2/NR2F1/PPDPF/RAD51D/BAMBI/EPB41L4A/NUP160/PDE4B/BCL7A/RECQL4/TNC/LPCAT4/ATXN1/CCNE2/C4orf19/IGFBP3/ZFP36L2/CTNND2/ABCC5/MARCKS/RIBC2/CRABP2/TRAF5/RBMS1/HLA-A/VTCN1/SIX2/SOS1/TINAGL1/SUZ12/PSIP1/APOBEC3B/CHAF1A/…
CONCANNON_APOPTOSIS_BY_EPOXOMICIN_DN	174	-0.560588	-1.92997	4.6173e-08	9.28018e-07	5.95128e-07	2606	tags=37%, list=6%, signal=35%	CHGA/POLD1/CDC20/RGS4/HMMR/H1-10/FABP5/MARCKS/INSIG1/SPRY2/ICA1/MTUS1/AURKA/GDF11/NFIB/PLK1/SPC25/PFKP/ASCL1/MAD2L1/FZD2/MYOF/TENM4/ALDH7A1/MAP2K6/TMSB15A/H2AZ2/DACH1/CBX5/LDHA/PCLAF/STMN1/ETV1/MYCN/TSPOAP1/IGSF3/CENPA/TMSB4X/ALDOC/MKI67/BCL11A/MARCKSL1/CDK1/BIRC5/BUB1/DPY19L1/DLGAP5/PTTG1/CD24/CCNA2/UBE2C/HMGB2/PTX3/NREP/CADM1/PDGFRL/TOP2A/PDK1/PPFIA4/AURKB/KIFC1/VCAN/CHRDL1/MFAP4
KEGG_VALINE_LEUCINE_AND_ISOLEUCINE_DEGRADATION	44	0.792761	2.11461	4.78348e-08	9.5731e-07	6.13912e-07	2813	tags=64%, list=6%, signal=60%	ACAD8/ACADSB/ACAT1/ALDH2/ALDH6A1/HSD17B10/MCCC1/ECHS1/ALDH1B1/PCCB/HADHA/ACADM/HADHB/MCCC2/ACAA1/BCAT2/MMUT/DLD/BCKDHB/PCCA/HMGCL/BCKDHA/HIBADH/HADH/ALDH9A1/HIBCH/MCEE/DBT
SCHAEFFER_PROSTATE_DEVELOPMENT_48HR_UP	443	0.472039	1.68139	5.13882e-08	1.02405e-06	6.56711e-07	5291	tags=37%, list=12%, signal=33%	NQO1/DDIT4L/HPGD/SULT1A1/GAS6/SMOC1/EMP2/ERGIC1/HOPX/PROM2/ALDH6A1/UPK2/CITED2/DCXR/KLF9/SLC39A8/ACSM3/NT5E/KRT7/ALDH1A3/ISCU/RAB17/KLF15/SEC11C/TMPRSS2/CYP1B1/ATP1A1/NAPSA/KRT23/GPX2/ACSS1/TSC22D3/MFSD2A/ANXA9/TST/CALM1/TMEM9B/ERRFI1/VAMP8/FKBP5/GLB1L2/TIPARP/GABARAPL2/PHLDA3/KRT13/SCNN1A/GCLC/PLA2G4A/RASD1/BDH1/TRPV6/RAB5C/PIGF/CARD19/SLC1A5/SULT1E1/HMGN3/ARHGAP20/TPD52L1/EMB/ALDH1A1/SLC31A2/PL…
PETROVA_ENDOTHELIUM_LYMPHATIC_VS_BLOOD_UP	130	-0.593065	-1.96488	5.50869e-08	1.0931e-06	7.00995e-07	3614	tags=50%, list=8%, signal=46%	RAMP2/IGFBP2/CDKN3/ITGA1/PPARG/PROX1/DYRK3/TBX1/LYN/SPRY1/NR2F1/CCNE2/SELENOP/PDE8A/RAPGEF5/FLT4/SOCS2/ISG20/BTBD3/CCNB1/RBPMS/ADD3/CD200/PLK1/KIF2C/GINS1/DMTN/REEP1/USP13/PDLIM1/LBR/GPRC5B/RBP1/MYBL2/PCLAF/PDPN/ACSL3/MCM6/SMC4/NDC80/CKS1B/TTK/SPAG5/CSRP2/DCLK1/CCNB2/CENPF/CDK1/BUB1/FOXM1/LMNB1/TK1/PTTG1/CCNA2/UBE2C/HMGB2/OLFML2A/DSP/TOP2A/AURKB/BUB1B/KIF11/NDRG1/MEF2C/CDKN1C
REACTOME_RUNX1_REGULATES_TRANSCRIPTION_OF_GENES_INVOLVED_IN_DIFFERENTIATION_OF_HSCS	127	0.627724	1.99657	5.55441e-08	1.09752e-06	7.03831e-07	4846	tags=50%, list=11%, signal=44%	H2AC6/PSME2/H2BC21/H2BC12/PSMD8/H2AJ/H2BC4/RPS27A/PSMA7/H2BC5/PSME1/PSMD1/PSMB5/H4C8/PSMB6/H2BC8/PSMD9/CCNH/H3C10/PSMB10/PSMD14/PSMC4/H4-16/H2AC19/PSMA6/PSMD2/PSMD7/PSMA3/UBA52/PSMB4/PSMD13/UBB/PSMB1/PSMA5/PSMD4/H4C15/PSMC2/PSMA4/PSMB7/PSMA2/PSMD6/PSMB3/PSME3/PSMC3/H4C5/PSMC1/H2BC15/PSMB2/PSMF1/PSMD11/PSMC6/CDK7/H2AC18/PSMC5/SEM1/PSMD12/H3C14/H3C1/PSMB8/PSMD3/LMO2/H2AC8/PSMB9
WOO_LIVER_CANCER_RECURRENCE_DN	78	0.695405	2.06397	5.66734e-08	1.11513e-06	7.15123e-07	2664	tags=38%, list=6%, signal=36%	ACOX2/ACSL5/C4BPA/ACADSB/PEMT/DCXR/CPS1/ECHS1/C4BPB/PC/CYB5A/ACY1/EPHX1/ACAA1/GOT2/QDPR/PAH/CRAT/SLC25A15/SLC35A2/CYP2J2/EPHX2/POR/GCDH/GLUD1/PCYT2/SLC2A2/GLUL/HSD17B4/NHEJ1
NABA_ECM_GLYCOPROTEINS	194	-0.534289	-1.86297	6.05243e-08	1.18592e-06	7.60519e-07	3666	tags=28%, list=8%, signal=26%	LGI2/NPNT/IGFBP2/NID1/VWA5A/LAMB1/MATN3/FGL1/VWA5B2/FBN1/ABI3BP/INTS14/NTNG1/NDNF/CRISPLD2/PXDN/TNC/IGFBP3/AGRN/EMILIN2/FBLN5/CTHRC1/FBN2/RSPO2/TINAGL1/LAMC1/LGI1/CRIM1/LAMC2/COCH/LTBP4/NID2/VWA1/CCN4/MXRA5/INTS6L/LAMA3/VIT/LAMA5/FRAS1/SPARC/FBN3/EMID1/SNED1/SLIT2/IGFBP7/CRISPLD1/EFEMP2/LGI4/VWA2/FBLN1/MFAP4/NTN1/MFAP2
KAUFFMANN_DNA_REPAIR_GENES	230	-0.518602	-1.836	6.19979e-08	1.20973e-06	7.7579e-07	5012	tags=43%, list=12%, signal=38%	NUDT1/RPA4/PMS1/FANCF/SUPT16H/MUTYH/RDM1/SMC1A/SMC1B/MSH3/LIG1/WRN/TDG/SSRP1/DCLRE1A/PMS2P3/POLK/LIG3/OGG1/UBE2I/GTF2H3/FANCM/TOP3A/NBN/XRCC5/PNKP/NEIL3/MBD2/DCLRE1C/TEP1/RAD9B/FEN1/TINF2/MRE11/WDR33/EXO1/POLA2/RAD51D/XRCC4/ABL1/MBD5/RIF1/POLD1/RFC1/POLM/RECQL4/POLG/CHAF1B/DCLRE1B/RAD51/FANCC/DMC1/PARP1/TDP1/RFC3/FANCA/FANCL/BRCA2/SMC3/RAD21/XRCC3/POLI/MSH6/PARP2/RRM1/BRCA1/RFC5/CHAF1A/ATM/POLQ/M…
LU_EZH2_TARGETS_UP	286	0.523855	1.80107	6.7142e-08	1.30467e-06	8.36673e-07	5287	tags=43%, list=12%, signal=38%	AKR1C2/ACO2/TRIM16L/COMTD1/ETFB/ISOC2/PAQR7/CYP1B1/MFSD3/AP1S1/H2AJ/UQCR10/ZNHIT1/TMEM30A/ZDHHC16/ELOB/HAGHL/CBR1/LMTK3/NME2/NDUFA8/AVPI1/STUB1/RPS19BP1/MCRIP2/COX14/AHSA1/RPL36/MAPK11/CYB561D2/RPUSD1/TLCD1/SNHG32/RPS6KB2/PEX16/ATOX1/HABP4/PFDN6/PSMB10/GALT/HSDL2/PUSL1/TRAPPC5/MAPKAPK3/WDR74/MIEN1/OSBPL5/DDIT3/TEAD4/SDHC/LONP1/ADAP1/OGFR/HSD11B1L/PLAAT4/PSMD4/PSMB7/SHARPIN/EMC6/PDXP/AMDHD2/CUTA/S…
AGUIRRE_PANCREATIC_CANCER_COPY_NUMBER_UP	298	0.513402	1.76948	6.75859e-08	1.30787e-06	8.38724e-07	5452	tags=40%, list=13%, signal=35%	PDK4/PON3/NAPA/NFKBIB/PVT1/RPL13A/EML2/BAX/PSMD8/RPL18/CYC1/DDT/EPN3/G6PC3/ZNHIT1/EIF3K/MRPS12/NME1/PHB/RPS9/WDR3/CLTA/SDHA/NME2/RPL27/SLC25A13/SLC52A2/FIS1/ATP5MC1/PSMA7/GARS1/ARPC1B/RIOK3/PDCD6/MPP3/RAB5C/AP2S1/DLD/SLC1A5/ATP5F1E/SNAPC1/GRN/EEF1D/SCRIB/NDUFS6/RUVBL2/SLC35B1/CABYR/SNF8/EXOC3/RPS21/NSF/LSM1/NBR1/COA3/PDK2/ATP6V0A1/ACSF2/ARPC1A/SLC12A9/EPN1/UTP18/ASL/EXOSC4/CD3EAP/GPAA1/AARSD1/TST…
REACTOME_ASPARAGINE_N_LINKED_GLYCOSYLATION	302	0.514306	1.76906	7.66011e-08	1.46572e-06	9.39951e-07	6156	tags=41%, list=14%, signal=35%	NAPA/TUBA4A/CD55/FUCA1/MGAT5/ST6GALNAC1/MPDU1/ST6GALNAC4/F5/SPTBN2/CTSA/TRAPPC1/TGFA/RPS27A/FOLR1/DOLK/ALG1/TRAPPC2L/PMM1/RAB1B/ALG3/SLC35C1/CD59/CNIH1/TMED3/ST3GAL5/SPTB/DCTN3/SPTBN5/TUBB2A/COPE/ALG8/COG2/TRAPPC5/NSF/PPP6R1/UBA52/B4GALT3/MCFD2/MGAT1/UBB/TRAPPC6A/ACTR1A/TSTA3/AMDHD2/TMEM115/NPL/YKT6/DPM2/LMAN2L/PREB/UBXN1/SLC35A1/CAPZB/ARF4/VCP/ARF3/TRAPPC3/OS9/TUBB8/NEU1/ST3GAL6/EDEM3/MLEC/DAD1/…
REACTOME_COLLAGEN_BIOSYNTHESIS_AND_MODIFYING_ENZYMES	67	-0.705744	-2.12793	7.66819e-08	1.46572e-06	9.39951e-07	4396	tags=46%, list=10%, signal=42%	ADAMTS3/COL9A1/COL4A3/COL4A4/P4HA2/COL27A1/COLGALT1/COL5A1/COL4A6/COL1A2/COL1A1/COL14A1/COL7A1/COL5A2/PLOD1/COL18A1/COL16A1/P3H3/COL3A1/P3H1/COL2A1/COL19A1/COL4A2/COL11A1/SERPINH1/P4HA1/COL12A1/COL4A1/PLOD2/CRTAP/COL9A2
GEORGES_CELL_CYCLE_MIR192_TARGETS	62	-0.721651	-2.14316	7.66819e-08	1.46572e-06	9.39951e-07	4432	tags=61%, list=10%, signal=55%	DBF4B/SMARCB1/TDG/RB1/CDC73/BCL2/UVRAG/MIS12/NBN/NIN/CTCF/EXTL2/RAD51/TDP1/PIM1/RAD21/BRCA1/NFIB/POLQ/DTL/MAD2L1/PRPF38A/MCM10/CDC7/SEPTIN10/NFYA/FGF2/MCM3/MTSS1/RACGAP1/LMNB2/MCM6/NCAPH/KIF20B/MKI67/KIF14/USP1/DEK
REACTOME_DEGRADATION_OF_THE_EXTRACELLULAR_MATRIX	138	-0.579799	-1.93021	7.74661e-08	1.47469e-06	9.45703e-07	4366	tags=35%, list=10%, signal=31%	COL9A1/COL4A3/COL4A4/ADAM10/MMP16/CTSK/ADAM9/NID1/LAMB1/FBN1/MMP10/COL5A1/COL4A6/PHYKPL/COL1A2/FBN2/CTSS/COL1A1/ADAM17/MMP11/MMP14/LAMC1/MMP2/COL14A1/COL7A1/LAMC2/SPOCK3/COL5A2/CDH1/COL18A1/COL16A1/COL3A1/COL2A1/COL19A1/CTSV/LAMA3/COL4A2/COL11A1/CAPN5/LAMA5/ADAMTS16/ADAMTS1/FBN3/COL12A1/COL4A1/ADAMTS5/SCUBE3/COL9A2
BASSO_B_LYMPHOCYTE_NETWORK	145	0.606984	1.96135	8.57127e-08	1.62507e-06	1.04214e-06	3628	tags=46%, list=8%, signal=42%	QPCT/CTSH/RIPOR2/DESI1/AIMP2/NOP16/CYC1/CYCS/SLC25A4/SLC46A3/MVP/HSPE1/POLR2F/MRPS12/BIN1/EBNA1BP2/NME1/MRPL12/TOMM40/TIMM17A/GARS1/HSPA9/EEF1E1/AHSA1/ZNF593/RPS26/PSMD1/PSMB5/DDB2/MAP1B/LITAF/PRDX3/PSMD14/RUVBL2/NDUFAB1/PES1/MRPL3/CCND2/GABARAP/EIF4G1/EIF2S1/PSMD2/ELOC/PSMA3/BYSL/BUD31/PSMB7/TCP1/PAICS/EMG1/POLD2/ITPR2/FAM98A/ETHE1/PRDX4/LAPTM5/AFG3L2/SERBP1/CTPS1/SSBP1/WDR18/MYL12A/PSMB2/TUBG1/…
REACTOME_ANCHORING_OF_THE_BASAL_BODY_TO_THE_PLASMA_MEMBRANE	97	-0.640869	-2.0432	9.11301e-08	1.72082e-06	1.10354e-06	4309	tags=58%, list=10%, signal=52%	CEP72/SDCCAG8/MKS1/C2CD3/TMEM67/CEP63/TMEM216/AKAP9/CEP89/NEDD1/HAUS2/NPHP1/B9D2/CKAP5/ODF2/SEPTIN2/CLASP1/SCLT1/CEP164/FGFR1OP/PCNT/CEP83/HAUS1/CCP110/CDK5RAP2/HAUS6/SFI1/CEP41/CEP97/CEP162/CEP250/HAUS3/RAB3IP/TTBK2/CEP57/HAUS8/PLK1/TCTN2/NEK2/FBF1/PCM1/CEP192/KIF24/NINL/AHI1/ALMS1/TUBA1A/NDE1/CEP78/CDK1/CENPJ/PLK4/CNTRL/CEP135/HAUS4/TUBB
REACTOME_ARACHIDONIC_ACID_METABOLISM	59	0.739041	2.06866	9.2949e-08	1.74811e-06	1.12105e-06	2914	tags=37%, list=7%, signal=34%	PON3/HPGD/CYP4B1/CYP1A1/ALOX15B/GPX1/CYP1B1/GPX2/GGT5/CBR1/GPX4/PLA2G4A/PTGES2/AKR1C3/CYP2J2/EPHX2/PON1/ALOX12B/ABCC1/GGT1/ALOX5/CYP1A2
CROMER_TUMORIGENESIS_UP	58	-0.724155	-2.1276	1.13573e-07	2.12745e-06	1.36431e-06	3349	tags=43%, list=8%, signal=40%	IL1B/KRT17/MMP10/PXDN/TNC/IL6/COL1A2/MMP11/APOBEC3B/TNFAIP3/LAMC2/COL5A2/RBP1/PDPN/COL3A1/SLC2A3/LAMA3/COL4A2/COL11A1/PTK7/SPARC/CXCL1/CXCL8/CHST2/MFAP2
PEDERSEN_METASTASIS_BY_ERBB2_ISOFORM_7	395	-0.444673	-1.66172	1.14378e-07	2.134e-06	1.36851e-06	4380	tags=42%, list=10%, signal=38%	MST1R/VEGFC/SPRED1/CCDC121/CENPM/TFF3/CUL4A/GNA14/LINC01184/FBP1/TMTC4/HK2/NET1/SQOR/ADAM9/ANKRD22/FAM201A/ANKRD11/GINS2/NPNT/P4HA2/MOB3C/ITCH/ANGPTL4/AP1S3/STC2/LONRF2/ZNF165/AIF1L/CREB3L4/LOXL2/ZNF689/SAP30/SYNE2/WDR26/WDR34/TTC30B/CENPV/E2F8/PRIM1/SH3BGRL/GLIS3/SMURF1/PPP2R3A/CFLAR/MAFK/NR5A2/FNDC3B/LRCH3/RBM12B/SH3RF1/HILPDA/TYMS/CEP128/RAB3B/PCNT/RECQL4/JADE1/PXDN/DAAM1/PARPBP/CLDN1/ST8SIA4/…
MONTERO_THYROID_CANCER_POOR_SURVIVAL_UP	12	-0.945342	-1.99142	1.1843e-07	2.20083e-06	1.41137e-06	2389	tags=100%, list=5%, signal=95%	DIAPH3/RRM2/CENPA/CEP55/CCNB2/BIRC5/ANLN/UBE2C/PRC1/NUSAP1/ASPM
WHITFIELD_CELL_CYCLE_LITERATURE	44	-0.78242	-2.22487	1.19698e-07	2.2156e-06	1.42084e-06	2610	tags=70%, list=6%, signal=66%	TYMS/CDC20/CCNE2/BRCA2/CCNB1/NASP/AURKA/CCNF/RRM1/BRCA1/CDC6/PLK1/MSH2/CDKN2C/NPAT/MCM2/RRM2/RACGAP1/MCM6/CDC45/KIF20A/CENPA/CDC25C/CCNB2/CENPF/CDK1/BIRC5/BUB1/CCNA2/TOP2A/BUB1B
REACTOME_CLEC7A_DECTIN_1_SIGNALING	100	0.655454	2.0128	1.23475e-07	2.26758e-06	1.45417e-06	4432	tags=54%, list=10%, signal=49%	PSME2/PSMD8/PRKCD/CALM1/RPS27A/PSMA7/PDPK1/AHCYL1/PSME1/PSMD1/PSMB5/PSMB6/PSMD9/PSMB10/PSMD14/PSMC4/PSMA6/PSMD2/PSMD7/SKP1/PSMA3/UBA52/PSMB4/CDC34/PSMD13/UBB/PSMB1/PSMA5/PSMD4/PSMC2/PSMA4/PSMB7/PSMA2/ITPR2/PSMD6/UBE2M/PSMB3/PSME3/UBE2V1/PSMC3/PSMC1/PSMB2/PSMF1/PSMD11/CARD9/PSMC6/TAB3/CHUK/PSMC5/SEM1/CUL1/PSMD12/PSMB8/PSMD3
BENPORATH_MYC_TARGETS_WITH_EBOX	226	0.542903	1.8298	1.23188e-07	2.26758e-06	1.45417e-06	4722	tags=44%, list=11%, signal=39%	FAH/RPS19/SRD5A1/ACO2/ALDH2/RPL13A/HSPD1/MSN/BAX/RPS6/CEBPA/RPL23A/SLC4A2/GSTP1/SYNGR2/RPL27A/AKAP1/NME1/ACADM/PHB/HSPA8/SRM/IFRD2/RPL19/RPL36A/VAMP2/AMD1/PLA2G4A/PABPC1/SIGMAR1/BBC3/EEF1A2/QDPR/TXN/GOLGA7/OCA2/TOMM20/SQSTM1/MDM2/HSP90AB1/PDHA1/PPP1R7/SNHG5/RPS15/UROD/H4-16/GALT/PPID/CD63/RPL10/RHOG/CCND2/RBM3/PSMA3/UBA52/TIMM17B/PEX3/ID3/PSMB1/FASN/NR1D1/H4C15/TOP1/SLC9A3R2/EIF4E/MAGEA3/GALNS/CC…
DANG_MYC_TARGETS_UP	130	0.618253	1.96961	1.28807e-07	2.35626e-06	1.51104e-06	4591	tags=51%, list=11%, signal=46%	PINK1/RPS5/RPS19/HSPD1/AIMP2/RPL3/BAX/RPS16/RPL26/CCT5/RPS13/RPL13/HSPE1/RPL27A/AKAP1/NME1/RIOX2/PHB/HSPA8/SRM/NME2/RPL27/RPL32/RPS17/RPL19/EIF3C/RPL5/HSPA9/PA2G4/HSPA4/TXN/RPS20/PRDX3/EIF4B/PPID/RPL9/PSMG1/RPL10/CCND2/EIF2S1/NPM1/PSMB1/MRTO4/SLC25A3/PREP/FASN/TOP1/SLC39A6/EIF4E/POLD2/CKS2/UXT/GNL3/RPL22/SURF6/METTL1/MGST1/CEBPZ/MTHFD1/SHMT1/DKC1/PPIA/TFRC/RPS6KA2/CSTB/EIF4A1
KEGG_LYSOSOME	120	0.624732	1.97142	1.33831e-07	2.43346e-06	1.56055e-06	3045	tags=42%, list=7%, signal=39%	CTSH/SMPD1/ATP6V0D1/ATP6V0B/FUCA1/PSAP/ACP5/AP1S1/NAPSA/ATP6V0A4/ATP6V1H/ASAH1/GNPTG/CLTA/CTSA/LAMP3/AP1B1/GM2A/ATP6V0C/AP1M2/LIPA/GBA/ATP6AP1/CTNS/SORT1/CLTB/CLN3/GAA/NAGLU/CD63/IDUA/HYAL1/MCOLN1/SCARB2/ATP6V0A1/GNS/CTSE/CLTCL1/HEXA/PPT1/GALNS/IDS/IGF2R/NEU1/CLTC/AP3S1/LAPTM5/GLA/MAN2B1/M6PR
GOTZMANN_EPITHELIAL_TO_MESENCHYMAL_TRANSITION_UP	68	-0.692607	-2.08141	1.34066e-07	2.43346e-06	1.56055e-06	2888	tags=53%, list=7%, signal=50%	NR2F1/SMARCD1/INHBB/PROS1/TNC/TGFB3/DCK/COL1A1/ZFX/BRCA1/IL4R/RBBP6/EDN1/CHRNB1/RBL1/COL5A2/MCM3/INHBA/COL18A1/COL3A1/CENPA/CTSV/COL4A2/MKI67/TEAD2/CHEK1/PLK4/GLG1/SMAD1/IGFBP7/COL4A1/MPDZ/KIFC1/PDGFA/HMGB1/CDH2
BOQUEST_STEM_CELL_UP	261	-0.489843	-1.75969	1.40237e-07	2.53565e-06	1.62608e-06	2866	tags=31%, list=7%, signal=29%	BHMT2/C5orf15/TMEM176B/RECK/HAS1/CTSK/NET1/LRP1/FXYD1/FBN1/SOX9/S100A4/ABI3BP/PDGFD/SLC2A10/CRISPLD2/TNC/COL5A1/EGFR/IGFBP3/LSP1P4/BMPR1A/ROBO1/PPL/SCRN1/COL1A2/FBLN5/CRABP2/COL1A1/ANG/EFS/TRO/SCARA3/CDKN2C/MMP2/COL14A1/PCDH9/EMP3/LPAR1/PTPRG/COL5A2/NOVA1/SLC5A3/INHBA/RNASE4/SGCE/C1R/PTPRD/COL16A1/CFH/COL3A1/MXRA5/SDC2/PLBD1/SEMA3C/MEIS2/DCLK1/OLFML2B/CDO1/MEST/AXL/PLAGL1/SLIT2/OLFML3/FZD7/RCN3/P…
FURUKAWA_DUSP6_TARGETS_PCI35_DN	73	-0.683262	-2.08293	1.44736e-07	2.60691e-06	1.67179e-06	2318	tags=49%, list=5%, signal=47%	CCNE2/EPHA2/MTFR2/MAFF/CCNB1/AURKA/RRM1/POLQ/DTL/KIF2C/BLM/SHCBP1/PBK/NCAPG/MCM4/CKAP2/RFC4/RACGAP1/KIF20B/CENPA/CEP55/NCAPD2/CCNB2/MCM5/CENPF/STIL/DLGAP5/SLCO2A1/TPX2/CCNA2/PRC1/NUSAP1/ARHGAP11A/HJURP/AURKB/KIF11
REACTOME_AMINO_ACIDS_REGULATE_MTORC1	54	0.760233	2.10062	1.51183e-07	2.71261e-06	1.73957e-06	4905	tags=63%, list=11%, signal=56%	ATP6V1A/ATP6V0D1/ATP6V1E1/ATP6V0B/SESN2/ATP6V1H/ATP6V1F/ATP6V1D/RRAGC/ATP6V0E1/SESN1/ATP6V1B2/ATP6V0C/CASTOR2/LAMTOR3/RRAGA/LAMTOR5/ATP6V1C1/LAMTOR1/ATP6V1G1/ATP6V1G2/RHEB/LAMTOR4/SH3BP4/ATP6V0E2/MLST8/KPTN/SLC38A9/CASTOR1/LAMTOR2/NPRL3/RRAGB/NPRL2/MTOR
KEGG_CITRATE_CYCLE_TCA_CYCLE	31	0.831583	2.06407	1.59322e-07	2.84773e-06	1.82622e-06	2582	tags=71%, list=6%, signal=67%	ACO2/IDH3A/FH/SUCLG1/PC/SDHB/MDH2/SDHA/IDH1/SUCLG2/OGDH/CS/SDHD/DLD/ACO1/PDHA1/PDHB/MDH1/SDHC/SUCLA2/IDH3G/IDH3B
SCHAEFFER_SOX9_TARGETS_IN_PROSTATE_DEVELOPMENT_DN	45	-0.758167	-2.16867	1.69079e-07	3.01063e-06	1.93069e-06	5722	tags=71%, list=13%, signal=62%	SPTBN1/MEIS1/ETS1/ELAVL1/CDC27/ELAVL4/ANKRD11/SYT4/YWHAZ/SFRP1/PUM1/FBLN5/DAB2IP/MYCL/NASP/RBFOX2/TCF4/PHF6/NAV1/RRM2/TRIM8/CDCA7/INHBA/PCDH18/NFIX/STMN1/KLF3/CDK2/SOX4/SLIT2/TIAM1/HMGB1
WAMUNYOKOLI_OVARIAN_CANCER_LMP_DN	197	-0.530007	-1.84941	1.80035e-07	3.19358e-06	2.04801e-06	4778	tags=43%, list=11%, signal=39%	ARNT/WDFY3/AP1S2/RAB11FIP2/SOCS5/IRF2BPL/FLRT2/KPNA5/GPRASP1/DDX5/FAM13B/GLIDR/DPYD/PTPN21/EFHC1/ADH5/CTSK/AJUBA/KAT2B/UGP2/LONRF2/DOK5/WT1/ZNF286A/CDON/ZFPM2/ATP11C/SPRY1/NR2F1/S100PBP/CAP2/PDGFD/EXTL2/ZNF483/PROS1/TAOK1/DCBLD2/PDGFC/FBXL3/ZBTB20/ZNF641/FER/SLC30A4/SPAG9/DOCK11/SOX6/TMEM237/SRGAP2/MYH10/RBMS1/BLOC1S6/HNRNPD/CCDC50/PSIP1/RBFOX2/XPO1/TCF4/GCA/FERMT2/ZKSCAN8/NUCKS1/REEP1/LXN/PNMA8A…
REACTOME_SUMOYLATION_OF_DNA_DAMAGE_RESPONSE_AND_REPAIR_PROTEINS	77	-0.673919	-2.06973	1.83682e-07	3.24597e-06	2.08161e-06	4762	tags=47%, list=11%, signal=42%	POM121C/SMC1A/WRN/TDG/UBE2I/NUP85/PHC2/STAG2/NUP37/SUMO2/RNF2/XRCC4/NUP160/HDAC7/NUP58/PHC3/PARP1/SMC3/RAD21/RNF168/SMC5/BRCA1/NUP54/STAG1/BLM/NUP153/NUP62/TPR/NUP107/CDKN2A/NSMCE4A/SUMO3/PCGF2/PHC1/NUP210/NDC1
REACTOME_ACTIVATION_OF_THE_PRE_REPLICATIVE_COMPLEX	33	-0.799692	-2.14624	1.86896e-07	3.29035e-06	2.11006e-06	5408	tags=73%, list=12%, signal=64%	ORC2/POLE2/RPA4/DBF4/PRIM2/PRIM1/POLA2/ORC1/MCM7/CDT1/CDC6/POLA1/MCM2/GMNN/MCM10/CDC7/MCM3/MCM4/POLE/MCM8/MCM6/CDC45/MCM5/CDK2
WOO_LIVER_CANCER_RECURRENCE_UP	104	-0.620442	-1.99691	1.89129e-07	3.31719e-06	2.12728e-06	4082	tags=42%, list=9%, signal=38%	FGD6/TLK2/EFHC1/HK2/BCL2/JAG2/RGS1/SOX9/IGFBP3/FZD1/COL1A2/MARCKS/ALDOA/COL1A1/ARHGEF2/EXT1/TPM4/PFKP/EVL/TPBG/PKM/CSGALNACT1/PLAUR/CXCL6/DBN1/PLCE1/SEMA3C/COL11A1/PTMA/LAMA5/FGFR2/EPHA3/CXCL1/TACSTD2/CXCL8/PLAGL1/FLNA/SLIT2/ENO2/PDGFA/MEF2C/LOX/COL9A2/DPYSL3
SWEET_LUNG_CANCER_KRAS_DN	408	-0.439471	-1.64664	1.90105e-07	3.32187e-06	2.13028e-06	4339	tags=32%, list=10%, signal=29%	LTB/HNRNPA1/ARHGEF3/GPM6B/ZMYND11/PCDHA9/CA3/SPTAN1/RECK/MYO1B/TNXB/KIT/SLCO3A1/MAP7D1/TAGLN/NUMB/CNTN1/TNNT2/NPNT/RAMP2/IGFBP2/SERPING1/IL6ST/NID1/LAMB1/EFNB2/UPK3B/BCL6B/AHR/GRK5/IL1B/FXYD1/XIST/RDH11/FOXF2/GSTM1/PGRMC1/DENND2B/PRX/ENAH/PPP1CB/FYN/FGF9/LIN9/ZBTB20/GNG2/ST8SIA4/LOXL1/ROBO1/HEY1/GUCY1B1/IFIH1/ADRB2/COL1A2/CDR2/SIAH1/MFHAS1/MARCKS/PGM2/TNNT3/CLIC4/COL1A1/RCN1/ABCA1/FEZ2/PSIP1/NFIB…
SENESE_HDAC2_TARGETS_DN	131	-0.581021	-1.92576	1.95556e-07	3.40443e-06	2.18322e-06	3862	tags=37%, list=9%, signal=34%	BEX1/TAGLN/MGAM/TNNT2/LOXL1-AS1/THUMPD1/HDAC2/KRT17/TRIM2/S100A4/ETAA1/DTNA/CAP2/STOX2/ZBTB20/LOXL1/ZNF362/RHOBTB1/INSIG1/COL1A1/NFIB/SCARA3/OCLN/PKP2/DEPDC1/TPM1/NPPB/PDLIM1/COL5A2/SYT11/PLCE1/PKIB/FGF11/COL3A1/TMEM255A/SDC2/SEMA3B/COL11A1/NRXN3/FKBP9/IGFBP7/OLFML3/SPX/EFEMP2/RTKN2/FADS2/SCD/GPNMB/LOX
SABATES_COLORECTAL_ADENOMA_DN	290	-0.473569	-1.72994	2.04781e-07	3.55181e-06	2.27774e-06	4635	tags=28%, list=11%, signal=25%	NEUROD1/FLRT2/MEP1B/SLC25A34/GPC6/ZNF536/CNN1/GPM6B/GFRA3/PYY/BRINP3/DOCK10/ANO5/SCG2/SYNPO2/PDE3A/PTN/PCDH19/BTNL8/FXYD1/KCNIP4/GUCA2A/PTPRR/DPP10/CHRNA1/PPY/ITIH5/B3GALT5/NR5A2/ABI3BP/SFRP1/ZNF483/CHGA/ADCY2/MST1/RAB3B/CD37/TNFRSF13C/FMN2/CMAHP/SCGN/TMCC3/DPP10-AS1/RSPO2/MAMDC2/CDKN2B-AS1/TBC1D9/DSEL/TPH1/OSR1/COL14A1/ZNF667-AS1/PCDH9/THRB/LPAR1/NAP1L3/ITGA4/SLC15A1/PKIB/INSM1/CFH/TMEM255A/PAG1…
DAZARD_UV_RESPONSE_CLUSTER_G6	142	-0.579471	-1.93828	2.06393e-07	3.56656e-06	2.28719e-06	6553	tags=58%, list=15%, signal=49%	SLBP/NAV3/BIRC2/ATP2B1/MECP2/CDYL/ZNF146/IRS1/MEIS1/ORC2/POLE2/ZHX2/TUBGCP3/USP24/PMS1/ZNF451/SPOP/TLK1/MARCHF6/ZMIZ1/CNOT4/VEGFC/TUT4/AUTS2/LSM14A/CHD9/TLK2/OTUD4/NFKB1/JARID2/SP3/PPP1R12A/EDRF1/CNOT2/MBD2/BBX/SLC9A6/PHLPP1/AGO2/FRYL/CLASP1/ABL1/KAT6A/BCL7A/LARP7/CENPC/FYN/KAT6B/NPAS2/AC118549.1/TOGARAM1/WAPL/PHF3/CCNB1/SMC5/FNBP1L/ZNF638/MTUS1/XPO1/GNE/IGF2BP3/FERMT2/POLD3/SUCO/FNDC3A/QKI/PHIP/…
REACTOME_AUTOPHAGY	150	0.592505	1.92098	2.08721e-07	3.58037e-06	2.29605e-06	4951	tags=51%, list=11%, signal=46%	PINK1/TUBA4A/VDAC1/EEF1A1/MAP1LC3B/ATG4A/TSG101/TOMM40/HSPA8/RRAGC/RPS27A/GABARAPL2/ATG3/PARK7/PGAM5/TOMM20/SQSTM1/HSP90AB1/LAMTOR3/TUBB2A/TOMM5/EPAS1/ATG101/RRAGA/GABARAP/LAMTOR5/PRKAG2/HSF1/MAP1LC3A/CHMP2A/CSNK2B/NBR1/WIPI2/UBA52/TOMM70/LAMTOR1/UBB/PRKAB2/MVB12B/ATG4D/VCP/RHEB/TUBB8/TOMM6/LAMTOR4/RB1CC1/UBE2V1/PRKAG1/HSP90AA1/ATG4B/CHMP4B/BECN1/WDR45/CHMP3/ATG9A/UBAP1/PEX5/GABARAPL1/MVB12A/CHMP…
DAVICIONI_MOLECULAR_ARMS_VS_ERMS_DN	177	-0.536815	-1.85107	2.08527e-07	3.58037e-06	2.29605e-06	4091	tags=40%, list=9%, signal=36%	P3H4/CYP26B1/PARVA/IER2/CDC42EP4/NCOA2/CNNM4/LINC00963/PTN/ERF/NBN/PTH1R/GAREM1/RBMS3/PLK2/NUAK1/GSTM1/FNDC3B/TRIL/PGRMC1/DENND2A/SLC43A3/EGFR/ZFP36L2/ZNF16/FABP5/HEY1/EVA1B/CRABP2/FBN2/MAGEL2/NNAT/PTP4A3/EXT1/ARHGEF40/SCARA3/MMP2/EPHB4/TRPS1/RAB32/TPBG/EMP3/LPAR1/LTBP4/HIF3A/COL5A2/SOSTDC1/CSRNP3/TRIB2/NYNRIN/P3H3/PLBD1/SEMA3B/FZD4/FAT4/SORBS3/SERPINH1/OLFML3/FZD7/WLS/OBSL1/TMEM45A/EFEMP2/PDGFRL…
REACTOME_CELL_CYCLE_CHECKPOINTS	289	-0.477148	-1.74437	2.31869e-07	3.95073e-06	2.53356e-06	4490	tags=39%, list=10%, signal=36%	ABRAXAS1/PKMYT1/CDC25A/WRN/RNF8/CENPM/DYNC1LI2/DBF4/PCBP4/CENPE/YWHAH/CENPL/NUP85/TOP3A/MIS12/NBN/B9D2/RAD9B/NUP37/SKA2/YWHAZ/CKAP5/MRE11/EXO1/CLASP1/ZWILCH/NUP160/ZW10/TAOK1/RMI2/SPDL1/PPP2R5B/CDC20/CENPC/CCNE2/CDC23/ITGB3BP/SFN/CENPN/UBE2D1/ORC1/MDM4/MCM7/RFC3/CLSPN/CENPO/RNF168/UBC/CCNB1/RHNO1/BRCA1/CDC6/XPO1/DNA2/RFC5/ATM/PLK1/SPC25/KIF2C/MAD2L1/SPC24/CENPQ/DSN1/TP53BP1/MCM2/NUF2/BLM/WEE1/MCM…
GAL_LEUKEMIC_STEM_CELL_DN	227	-0.506114	-1.79298	2.31999e-07	3.95073e-06	2.53356e-06	3632	tags=32%, list=8%, signal=30%	GINS2/IGFBP2/CDKN3/NCF2/IL1B/CD226/TEP1/E2F8/FEN1/FNTB/TUBB2B/POLA2/TYMS/LGALS3/ADCY2/POLM/TPI1/CDC20/HMMR/RAD51/SERPINA1/ZFY/ORC1/REST/HOMER3/FER1L4/CAPG/ERMAP/CCNB1/ENC1/CDC6/PLK1/E2F2/CASP1/ALB/ASF1B/RRM2/COCH/PPP1R12B/ZNF589/SHCBP1/NCAPG/PCLAF/COL18A1/PASK/ACAA2/CDC45/KIF20A/CENPA/CDC25C/CEBPD/ZWINT/SMC2/CDCA8/CCNB2/TYMP/CDK1/CXCL1/BIRC5/BUB1/MELK/LMNB1/LRP2/CCNA2/IGFBP7/NUSAP1/KIF18B/GTSE1/T…
GRESHOCK_CANCER_COPY_NUMBER_UP	319	-0.464913	-1.69929	2.34347e-07	3.97625e-06	2.54993e-06	5276	tags=40%, list=12%, signal=36%	TAL1/BIRC3/HOXC11/NCKIPSD/BRD4/AFF4/PMS1/FANCF/NF1/ARNT/MUTYH/GNAS/PAX7/TRIP11/MYH9/WRN/BCL11B/ERG/HNF1A/MLLT1/CREBBP/SMARCB1/TCL6/MLLT10/LASP1/RB1/KIT/TRIM33/BCL2/BCL3/NCOA2/ZNF384/MLLT3/NBN/PPARG/NIN/BCL9/THRAP3/WT1/ERC1/MUC1/MYC/RANBP17/RBM15/ABL1/PRDM16/FGFR1OP/SET/RECQL4/LPP/HIP1/ETV6/MNX1/MLF1/KAT6B/AFDN/EGFR/REL/EWSR1/BMPR1A/NFKB2/FLT4/ROS1/AFF1/FANCC/GOPC/MET/FANCA/PIM1/BRCA2/CBL/TCF12/ML…
SCHUHMACHER_MYC_TARGETS_UP	80	0.682928	2.0309	2.57166e-07	4.34768e-06	2.78812e-06	4995	tags=57%, list=11%, signal=51%	DANCR/AIMP2/RRS1/AHCY/TMEM97/TRAP1/VARS1/CYCS/BOP1/IMPDH2/HSPE1/EBNA1BP2/AKAP1/NME1/GCSH/SRM/ATP1B3/UCHL3/DDX21/GPD1L/PNO1/PEBP1/MRPL3/SLC20A1/FASN/IARS1/SLC39A6/ABCE1/PAICS/POLD2/PRDX4/RABEPK/ACSL1/CTPS1/PUM3/MGST1/CEBPZ/NAMPT/NOLC1/TBL3/MTHFD1/TFRC/EXOSC7/RRP1B/TARBP1/AUH
LY_AGING_PREMATURE_DN	30	-0.815158	-2.1399	2.61078e-07	4.39795e-06	2.82036e-06	2891	tags=67%, list=7%, signal=62%	SAFB/PTGS2/TYMS/HMGN2/PARP1/NASP/CCNF/KIF2C/MCM2/SERPINB2/MYBL2/MCL1/CENPA/CKS1B/H2AX/FOXM1/CXCL8/BARD1/CBX1/HMGB2
REACTOME_CILIUM_ASSEMBLY	201	-0.517653	-1.81539	2.75276e-07	4.62049e-06	2.96307e-06	5286	tags=43%, list=12%, signal=38%	CEP72/SDCCAG8/MKS1/IFT46/IFT74/IFT172/LZTFL1/TUBB3/IFT88/C2CD3/TRIP11/PKD1/TMEM67/CEP63/TMEM216/PDE6D/AKAP9/CEP89/IFT81/NEDD1/HAUS2/ATAT1/NPHP1/WDR34/TTC30B/B9D2/WDR19/CKAP5/TUBB2B/ODF2/TUBA1C/RP2/SEPTIN2/CLASP1/SCLT1/BBS4/CEP164/FGFR1OP/PCNT/CEP83/HAUS1/CCP110/CDK5RAP2/HAUS6/IFT80/SFI1/CEP41/CEP97/CEP162/CEP250/HAUS3/TUBB1/NPHP3/ARL13B/RAB3IP/TTBK2/CEP57/HAUS8/PLK1/TCTN2/NEK2/FBF1/PCM1/CEP192/KI…
BURTON_ADIPOGENESIS_PEAK_AT_24HR	45	-0.751928	-2.15083	2.8053e-07	4.69186e-06	3.00884e-06	2338	tags=60%, list=5%, signal=57%	CDC20/HMMR/SRSF1/CAD/CCNB1/KPNA2/RRM1/GALK1/RACGAP1/STMN1/KIF22/KIF20A/CDC25C/H2AX/CDK1/BUB1/MELK/ANLN/TK1/PTTG1/CCNA2/UBE2C/PRC1/NUSAP1/TOP2A/AURKB/KIFC1
RUTELLA_RESPONSE_TO_HGF_VS_CSF2RB_AND_IL4_UP	404	0.465049	1.64002	2.85645e-07	4.76042e-06	3.05281e-06	5379	tags=38%, list=12%, signal=34%	NQO1/RGCC/FAH/SC5D/KCNMA1/AKR1C1/PINK1/SLAMF7/TFEB/ACAT1/CCRL2/TUBA4A/SH3BP5/ME1/GRPEL1/CD55/KLF9/PRDX1/CD81/CYP1B1/ACP5/NAT1/MPRIP/GSR/HADHA/G6PC3/ATP6V1H/EMC7/SLC29A3/CXCL10/SLC7A7/ASAH1/VAT1/APOE/BCAP31/ATP6V0E1/DENND3/GTF3A/SCO2/GM2A/SPP1/GOT2/STAT1/MX2/CD9/RER1/CCR1/SCAMP2/GBA/PPIF/ACADVL/IFI6/PSMB5/STS/SQSTM1/NINJ2/ACO1/PIR/DECR1/AKR1B1/APLP2/SLC3A2/CD63/SLC35B1/S100A9/PSMG1/EIF2S1/MDH1/NAR…
YU_MYC_TARGETS_UP	43	-0.753739	-2.13818	3.13099e-07	5.19944e-06	3.33435e-06	4035	tags=65%, list=9%, signal=59%	UBE2S/CDKN3/E2F8/HMGN2/CLIC4/BRCA2/CCNB1/KPNA2/AURKA/RRM1/PLK1/NUP54/DTL/GMNN/ECT2/RACGAP1/PCLAF/KIF20A/CKS1B/MKI67/CCNB2/CDK1/BIRC5/BUB1/ANLN/HMGB2/TOP2A/ASPM
BILANGES_SERUM_RESPONSE_TRANSLATION	32	0.822004	2.05502	3.31742e-07	5.47751e-06	3.51267e-06	3244	tags=66%, list=7%, signal=61%	RPS5/RPS19/RPL4/EEF1A1/EEF1G/RPS6/RPL18A/RPL14/RPS3/RPL29/RPS8/EIF3H/RACK1/RPS7/EEF1B2/RPL6/NSA2/RPL10/RPS4X/RPL21/EIF3F
PID_PLK1_PATHWAY	46	-0.746947	-2.12883	3.32183e-07	5.47751e-06	3.51267e-06	4003	tags=63%, list=9%, signal=57%	FZR1/CENPE/PPP1R12A/STAG2/ODF2/PPP1CB/CDC20/BORA/CLSPN/CCNB1/AURKA/PLK1/FBXO5/SPC24/WEE1/ECT2/NINL/INCENP/SGO1/ERCC6L/NDC80/KIF20A/CDC25C/CENPU/CDK1/BUB1/TPX2/PRC1/BUB1B
PLASARI_TGFB1_TARGETS_10HR_DN	252	-0.489227	-1.75207	3.38004e-07	5.55394e-06	3.56168e-06	5438	tags=46%, list=13%, signal=40%	MAP2/ARHGAP18/TCF7L2/CALHM5/CELF2/ARID5B/PLPP3/PIK3R1/LGR4/PDLIM2/IGFBP5/KNSTRN/MED12L/ANGPT2/MT1E/PALMD/AUTS2/KLHL24/LRRCC1/PDE5A/MMP16/SERPINB1/LILRB2/CDKN3/IL6ST/VWA5A/MLLT3/SORD/LPL/PRIM1/WDR19/SH3BGRL/GSTM1/TRIM2/PDE1A/TGFBR3/ADGRG6/RND3/ZWILCH/FOXP2/NFIA/ARL6IP1/MAN1A1/HMMR/ARNT2/ITGB3BP/SIM2/ADGRG2/ARHGAP28/EIF2AK2/MARCKS/SIX1/RFC3/RSPO2/MSH6/ZFP28/CCNB1/TOX/MMP11/DIXDC1/NFIB/SCARA3/EYA1/C…
VART_KSHV_INFECTION_ANGIOGENIC_MARKERS_UP	159	-0.551423	-1.87913	3.50021e-07	5.71132e-06	3.66261e-06	4337	tags=32%, list=10%, signal=29%	VEGFC/FRS2/DLL3/COL4A3/TNF/IL6ST/ATG9B/JAG2/PTN/EFNB2/NRP2/IL1B/EPHA4/EFNA2/PDGFD/PTGS2/GRB7/TGFB3/AGGF1/IL6/TNFSF13/OSMR/FLT4/HEY1/DLL1/ANGPTL2/PDGFB/PLAUR/FZD6/VEGFA/PGF/CXCL6/PTEN/COL18A1/COL4A2/FZD4/FGFR2/SPARC/EPHA6/PROM1/EPHA3/TGFBR1/EFNA1/FGFR3/FZD7/SERPINF1/CXCL3/PDGFA/CXCL2/FRZB/KDR
FARDIN_HYPOXIA_11	32	-0.809307	-2.16563	3.4895e-07	5.71132e-06	3.66261e-06	3571	tags=59%, list=8%, signal=55%	P4HA2/ANGPTL4/ANKRD37/TPI1/IGFBP3/TNIP1/PGK1/VEGFA/PGM1/PLOD1/SLC2A3/ALDOC/FUT11/EGLN3/PFKFB4/PDK1/EGLN1/NDRG1/ZNF395
BENPORATH_NOS_TARGETS	178	-0.532291	-1.83749	3.67669e-07	5.97845e-06	3.83392e-06	4407	tags=47%, list=10%, signal=43%	JUP/SULF1/CDYL/ARID1B/KDM3A/BUB3/GRHL2/YJU2/KATNBL1/TAL1/DUSP6/HAS2/GNPTAB/OGA/SPRED1/STAT3/HMG20A/MLLT10/DKK1/RBM22/LRAT/CACNA2D1/B3GALT4/CDK17/KIAA1143/EXOSC9/JARID2/LINGO1/RIC8B/OBI1/TNRC6A/PDCL/SKA2/PPP2R3A/DTNA/BAMBI/SFRP1/KAT6A/RIF1/SET/AASDH/JADE1/TNC/MED12/SPAG9/SKIL/ORC1/REST/TMEM170A/SRSF4/ANO8/KANK1/ADD3/TRIM24/FUS/HHEX/NUCKS1/SMARCAD1/PRPF38A/CDC7/FGF2/LARGE1/PRR11/LRRN1/PNISR/ATAD2/K…
CHIARETTI_T_ALL_RELAPSE_PROGNOSIS	19	-0.87904	-2.09673	3.78992e-07	6.14124e-06	3.93831e-06	995	tags=63%, list=2%, signal=62%	MYC/CDC7/NDC80/RCBTB2/TTK/H2AX/USP1/CENPF/HNRNPH1/MELK/DEK/BUB1B
VILLANUEVA_LIVER_CANCER_KRT19_DN	62	0.709009	2.00347	3.87491e-07	6.21445e-06	3.98526e-06	4538	tags=50%, list=10%, signal=45%	C4BPA/PINK1/CPT2/HSD17B10/UQCR11/ALDH1B1/DDT/ACY1/SOD1/NDUFS7/RETSAT/CBR1/ALPL/SLC1A1/GCLC/CRAT/POR/RMDN3/LARP4/PDK2/HIBADH/ABCB8/MCEE/ACMSD/MAGIX/SDC1/METTL7B/ACYP2/REEP5/APOA5/TM6SF2
BLUM_RESPONSE_TO_SALIRASIB_UP	245	0.524885	1.77634	3.86351e-07	6.21445e-06	3.98526e-06	5132	tags=44%, list=12%, signal=39%	CDKN1A/GHITM/RPL12/CD55/NINJ1/EEF2/FST/PSMD8/MAP1LC3B/TOM1/SARS1/PSAT1/TSG101/DNAJA3/YIF1A/RRAGC/ZPR1/GARS1/ATF6/EIF3H/RIOK3/HSPA9/SCAMP2/MARS1/WARS1/ZNF593/SLC1A5/ENTPD6/BLVRB/ESRRA/GOT1/SQSTM1/CNIH1/TMED3/MYO5A/SNHG32/GALE/SLC35A2/INPP1/TNFRSF10B/IFRD1/STX4/HMGCL/SURF1/NARS1/MAFG/NOP53/EIF2S2/BAK1/CARS1/BCL2L1/MGAT1/PFDN2/BUD31/IARS1/TBCE/ECH1/YKT6/CCNB1IP1/CBLB/UBXN1/FAM3A/ERP29/ARF4/DAP3/UBE2…
LU_AGING_BRAIN_UP	262	-0.480235	-1.73039	3.86869e-07	6.21445e-06	3.98526e-06	3727	tags=34%, list=9%, signal=31%	TNFRSF11B/BCL2/OGG1/SYPL1/ACTL6A/TGIF1/FXYD1/SLC16A1/PHLPP1/FRYL/TOR1AIP1/TASOR/BAMBI/INHBB/SFRP1/NIPBL/ANXA5/LRP4/ADGRA3/LPP/FYN/ZBTB20/IRF7/CAV2/SELENOP/AFF1/PLXNC1/HSPA2/IL33/GATM/PHF3/ADIRF/TP53BP2/CLIC4/ANP32B/SMC3/AMOTL2/SMC5/ABCG1/EFS/KANK1/ADD3/GNE/EYA1/WWTR1/FERMT2/ASCL1/CHSY1/HNRNPH3/SEPTIN10/MYOF/FGF2/GPRC5B/PTP4A2/VEGFA/BAZ2B/QKI/CLK1/AMOT/ITPKB/MTSS1/UNG/CFH/ACAA2/ANXA3/TMEM123/SDC2/…
SENGUPTA_NASOPHARYNGEAL_CARCINOMA_WITH_LMP1_UP	399	-0.436376	-1.63639	4.35083e-07	6.95391e-06	4.45947e-06	4584	tags=36%, list=11%, signal=33%	FLRT2/NORAD/HSP90B1/PMAIP1/CDC25A/B3GALNT1/HEPACAM2/KLHL24/HAND2-AS1/PDE5A/KIT/SYNCRIP/ZNF22/COX10-AS1/WDFY1/TNFRSF11B/MBNL1/FAR1/BCL2/SART3/EIF5A2/NEDD1/CD274/HELLS/RGS1/THRAP3/SINHCAF/LPL/ODAM/FAIM/PTPRR/SAP30/EPHA4/SF3B1/RBMS3/CDC42BPA/USP37/PTPRG-AS1/C2CD4A/TRIM2/CDKAL1/DSC3/CRISP3/PTHLH/MMP10/FNDC3B/PKN2/FXYD2/B4GALT6/PTGS2/LPAR3/FOXP2/RIF1/RSAD2/ANKRD36B/CTTNBP2/BOD1L1/TNC/RBM25/LINC00964/Z…
BILD_E2F3_ONCOGENIC_SIGNATURE	243	-0.48661	-1.73233	4.39865e-07	7.00642e-06	4.49314e-06	5278	tags=43%, list=12%, signal=38%	POLE2/PLPP3/TAF4/NCKIPSD/TMEM106C/AKT1/USPL1/SOX12/PFKFB3/RUNX3/AP1S2/GNAS/MYB/ENTPD1-AS1/KANK2/GNAL/BRI3BP/CD83/FAM171A1/RASEF/SFMBT1/CAMKK2/SLC9A3R1/SCN8A/SIX5/ARFGEF3/NIN/IL1B/RRAGD/CDK19/NIPA1/DVL3/FEN1/NR2F1/PHTF2/KCTD15/SIN3B/INHBB/B4GALT6/ANKRD18B/EPB41L4A/ZNF483/HECA/LRP4/RECQL4/TNC/RBM25/CCNE2/FGF9/DCLRE1B/CCP110/HACE1/SLC30A4/SREBF1/PHF10/RTN4R/PDE8A/FZD1/HEY1/DCK/EPHA2/MFHAS1/KDM2B/SRS…
REACTOME_PCP_CE_PATHWAY	92	0.662981	2.0223	4.49894e-07	7.14187e-06	4.58001e-06	4432	tags=61%, list=10%, signal=55%	PSME2/ROR1/PSMD8/AP2A1/PRKCA/CLTA/RPS27A/PSMA7/WNT5A/AP2S1/PSME1/PSMD1/PSMB5/PSMB6/PSMD9/CLTB/PSMB10/PSMD14/SCRIB/PSMC4/PSMA6/PSMD2/PSMD7/AP2M1/PSMA3/UBA52/PSMB4/PSMD13/UBB/PSMB1/PSMA5/PSMD4/DVL1/PSMC2/PSMA4/PSMB7/PSMA2/PFN1/PSMD6/PSMB3/CLTC/PSME3/WNT4/PSMC3/PSMC1/WNT11/PSMB2/WNT1/PSMF1/PSMD11/PSMC6/PSMC5/SEM1/PSMD12/PSMB8/PSMD3
REACTOME_REGULATION_OF_MRNA_STABILITY_BY_PROTEINS_THAT_BIND_AU_RICH_ELEMENTS	87	0.66647	2.01643	4.62856e-07	7.32282e-06	4.69605e-06	4846	tags=63%, list=11%, signal=56%	PSME2/PSMD8/PRKCD/PRKCA/HSPA8/RPS27A/PSMA7/YWHAB/PABPC1/EXOSC5/PSME1/MAPK11/PSMD1/PSMB5/PSMB6/PSMD9/PSMB10/PSMD14/PSMC4/EIF4G1/PSMA6/PSMD2/PSMD7/PSMA3/UBA52/PSMB4/PSMD13/UBB/PSMB1/EXOSC1/PSMA5/PSMD4/EXOSC4/PSMC2/PSMA4/PSMB7/PSMA2/PSMD6/PSMB3/PSME3/PSMC3/PSMC1/PSMB2/PSMF1/PSMD11/PSMC6/PSMC5/SEM1/PSMD12/EXOSC7/PSMB8/PSMD3/PARN/DIS3/PSMB9
BASAKI_YBX1_TARGETS_DN	387	-0.437429	-1.63356	4.64821e-07	7.32915e-06	4.70011e-06	4000	tags=35%, list=9%, signal=32%	KLHL24/STOX1/HLA-E/RBMXL1/SSBP4/HK2/NET1/ASPH/JAK3/SERPINB1/IER2/SLC9A1/IL6ST/LAMB1/NBN/DHRS13/CGNL1/SINHCAF/RNASET2/ZNF615/XIST/RRAGD/CERS6/SF3B1/NCBP3/BBX/MUC1/CDK19/MALL/SPRY1/FAM110C/CNTNAP3/SGK3/CHGA/PROS1/GRB14/SLC2A10/ANKRD36B/MINDY2/ZBTB20/GRB7/SF1/BDH2/CXADR/ZNF397/CARD8/SELENOP/SERPINA1/WIPF2/KCNK5/RBM39/SKIL/STC1/HEY1/NKTR/BTN3A2/PAXBP1/ZNF350/MET/ISG20/TARS3/SPRY2/RAB3IP/MAFF/GBE1/TCI…
SCIBETTA_KDM5B_TARGETS_DN	79	-0.652079	-2.01185	5.14073e-07	8.07853e-06	5.18067e-06	3730	tags=52%, list=9%, signal=48%	UBR7/IGFBP2/SOX9/TMEM14A/HMMR/TNFSF13/FABP5/OIP5/RECQL/INSIG1/LGALS3BP/MT1F/MT1X/KDM5B/CCNB1/SMC5/AURKA/BRCA1/PSIP1/GCA/NOL3/FBXO5/KIF2C/REEP1/ECT2/PBK/NMB/NCAPH/NDC80/TTK/IVNS1ABP/CDK1/CDCA3/DPY19L1/DLGAP5/CAV1/PDE3B/TOP2A/SKP2/BUB1B/TUBB
RUTELLA_RESPONSE_TO_HGF_UP	417	0.461475	1.6355	5.22667e-07	8.18611e-06	5.24967e-06	5338	tags=36%, list=12%, signal=32%	NQO1/FAH/SC5D/KCNMA1/AKR1C1/MAOA/PINK1/SLAMF7/VDR/TFEB/ACAT1/CCRL2/ME1/KLF9/PRDX1/CREG1/CD81/TMEM97/CYP1B1/ACP5/NAT1/JAK1/GSR/G6PC3/ATP6V1H/CYB5A/RFTN1/EMC7/SLC29A3/CXCL10/ASAH1/VAT1/LAMP3/APOE/BCAP31/ATP6V0E1/ATP1B3/GM2A/SPP1/GOT2/STAT1/CD9/RER1/CCR1/SCAMP2/GBA/PPIF/TXN/IFI6/CD59/PSMB5/SQSTM1/NIT2/ACO1/PIR/LITAF/CREBL2/AKR1B1/SLC3A2/CD63/SLC35B1/PSMG1/GABBR1/EIF2S1/MDH1/NARS1/SCARB2/ATP6V1C1/TSP…
REACTOME_GLYOXYLATE_METABOLISM_AND_GLYCINE_DEGRADATION	31	0.819233	2.03342	5.47979e-07	8.55396e-06	5.48556e-06	5559	tags=71%, list=13%, signal=62%	GLDC/ALDH4A1/PDHX/GCSH/GRHPR/GOT2/OGDH/DLD/PDHA1/PDHB/BCKDHB/HOGA1/NDUFAB1/BCKDHA/DHTKD1/DBT/LIAS/DLST/PRODH2/GNMT/DLAT/PXMP2
REACTOME_TRNA_AMINOACYLATION	42	0.770283	2.03677	5.51604e-07	8.58194e-06	5.50351e-06	5074	tags=69%, list=12%, signal=61%	MARS2/AIMP2/IARS2/VARS1/SARS1/YARS1/PPA1/KARS1/FARSA/GARS1/MARS1/EEF1E1/WARS1/FARSB/EARS2/NARS1/CARS1/HARS1/IARS1/PARS2/QARS1/LARS2/AIMP1/EPRS1/RARS1/WARS2/CARS2/NARS2/TARS1
JISON_SICKLE_CELL_DISEASE_UP	180	0.564195	1.86195	5.56809e-07	8.63423e-06	5.53704e-06	5455	tags=46%, list=13%, signal=40%	CDKN1A/HTATIP2/TXNRD1/IFI30/TCTA/PSME2/CCRL2/TALDO1/TCN2/DESI1/PRDX1/GPX1/CXCL10/ZMPSTE24/VAMP8/CTSA/ATP6V1D/TIMM17A/GM2A/RNF24/STAT1/CD9/GAS2L1/LIPA/TXN/CD151/BLVRB/BLVRA/ST3GAL5/IFIT2/ATOX1/TUBB2A/NDUFB7/ABLIM3/COX17/RSU1/JAK2/DDIT3/PSMA3/KYNU/ATP6V0A1/GNPDA1/NDUFS2/LEPROT/CALCOCO2/CLIC2/TAP1/NDUFAF3/SLC22A4/H1-0/VAMP5/GSTO1/UBE2L3/PRDX4/TFEC/BLOC1S1/PSMB2/RRP7A/IFIT1/H2AC18/DYNLT1/CUL1/CALR/F1…
REACTOME_IRON_UPTAKE_AND_TRANSPORT	56	0.727434	2.02645	5.96389e-07	9.21746e-06	5.91106e-06	4128	tags=64%, list=9%, signal=58%	FTL/ATP6V1A/ATP6V0D1/ATP6V1E1/ATP6V0B/ATP6V0A4/ATP6V1H/ATP6V1F/HMOX2/STEAP3/LCN2/ATP6V1D/RPS27A/ATP6V0E1/ATP6V1B2/ATP6V0C/ATP6AP1/NEDD8/ACO1/ABCG2/MCOLN1/SKP1/ATP6V1C1/UBA52/ATP6V0A1/ATP6V1G1/FTH1/GLRX3/UBB/ATP6V1G2/SLC22A17/ATP6V0E2/SLC40A1/CUL1/SLC46A1/TFRC
KARLSSON_TGFB1_TARGETS_UP	122	0.604768	1.91249	6.03724e-07	9.30012e-06	5.96407e-06	5358	tags=52%, list=12%, signal=45%	IDH3A/SLC25A5/WDR77/HSPD1/EIF5A/MSN/C16orf89/CYP1B1/CCT3/CYCS/MYBBP1A/RSL1D1/HSPE1/PPA1/GCSH/MPHOSPH6/SRM/C20orf27/UCHL3/DDX21/GARS1/HSPA9/EEF1E1/TOMM20/COQ10B/GTPBP4/CACYBP/CCT8/EIF4G1/EIF2S1/EIF2S2/TOMM70/RPF2/CDC34/SLC20A1/EIF3B/MRTO4/PREP/HSPH1/UTP18/CTU2/ABCE1/TCP1/EIF2B3/NSUN2/GNL3/ESD/EIF3A/PUM3/RWDD1/NOLC1/BMP1/ZC3H15/CCT2/ARHGAP26/GTF2F2/GJB3/PELO/GEMIN6/DLAT/LYAR/NAA15/BTBD10
REACTOME_NEDDYLATION	234	0.519974	1.75985	6.22881e-07	9.56377e-06	6.13315e-06	4712	tags=43%, list=11%, signal=39%	ZBTB16/PSME2/FBXO32/KLHL5/FBXO30/PSMD8/KLHL21/ELOB/DCAF13/GPS1/SPSB2/RPS27A/UCHL3/PSMA7/FBXO31/DDB1/FBXO22/PSME1/PSMD1/PSMB5/DDB2/NEDD8/PSMB6/PSMD9/EPAS1/PSMB10/PSMD14/PSMC4/FBXO2/WDTC1/PSMA6/PSMD2/PSMD7/ELOC/SKP1/PSMA3/SPSB1/UBA52/COMMD10/PSMB4/PSMD13/COPS5/KEAP1/UBB/PSMB1/DCUN1D5/PSMA5/DCAF11/FBXO27/UBE2F/PSMD4/GAN/PSMC2/PSMA4/PSMB7/COPS6/FBXO44/COPS8/PSMA2/BTBD1/PSMD6/UBE2M/FBXO9/PSMB3/CUL3/PS…
BOCHKIS_FOXA2_TARGETS	427	0.455866	1.61878	6.33811e-07	9.69979e-06	6.22037e-06	4894	tags=37%, list=11%, signal=33%	PDK4/FAH/FTL/GHITM/HPGD/CYP2A6/C4BPA/VDR/ALDH6A1/PEMT/ACSM3/PRDX1/KLF15/DEPP1/AHCY/BAAT/GPAM/TRAP1/VARS1/HADHA/H2AJ/SLC46A3/WDR46/CYB5A/TST/RHOD/DCAF13/SERPINA3/PRDX6/HPX/ATP5PF/NDUFA8/APOH/APOE/ACAA1/UBL3/MRPL36/ARRDC4/AK3/IDH1/NDUFS8/NDUFA2/HAGH/HM13/CD9/CS/PA2G4/COQ8A/PSME1/HPS1/MRPS2/EEF1B2/SORT1/CREBL2/ALDH1A1/C9orf152/PSMB10/LRPPRC/CYP2J2/PNPLA2/PES1/PI4K2A/CLN8/GDE1/MAFG/CHAC2/SYS1/KATNB1/…
BENPORATH_ES_CORE_NINE_CORRELATED	100	-0.611478	-1.96494	6.39451e-07	9.75423e-06	6.25528e-06	5348	tags=55%, list=12%, signal=48%	ILF2/DMRT1/GTF3C2/EED/SPIB/RUNX3/HIVEP1/SIX3/PNRC1/PAX6/BCL11B/KDM1A/SSRP1/CEBPG/MDFI/IRF1/TRIP13/VGLL1/SAP30/SOX9/E2F8/HDAC2/MYC/WDHD1/ETV6/ELF4/TLE1/VGLL4/TGIF2/ZBTB5/MYBL1/CBFB/NFIB/YEATS2/WWTR1/SOX11/GATA6/ILF3/RBL1/EZH2/MYBL2/LMO4/KLF5/CREB3L2/BCL11A/NMI/FOXM1/SOX4/KLF11/DEK/HMGB2/TCF7L1/PLAGL2/FOXC1/NSD2
LEE_LIVER_CANCER_SURVIVAL_UP	183	0.554307	1.83069	6.56201e-07	9.97724e-06	6.3983e-06	5364	tags=35%, list=12%, signal=31%	CSAG2/ACOX2/ALDH4A1/PINK1/SRD5A1/DCXR/CPT2/HSD17B10/TRIM55/ECHS1/C4BPB/BAAT/PCCB/ANXA9/PC/PRDX6/EPHX1/ABCC2/FBXO31/MRM1/HAGH/BDH1/COQ8A/ABHD6/PAH/STARD10/CRAT/CLTRN/MYRIP/CYP2J2/CPB2/HYAL1/SLC27A5/MSRA/TSKU/NDUFS2/SLC25A10/TACO1/CGREF1/PCYT2/MRPL46/APCS/SLC2A2/ITPR2/FMO3/AMDHD1/ACSL1/MVK/ATP6V0E2/WNT11/KHK/UGT1A6/F12/CES1/C2/CES2/APOA5/HGD/EGLN2/C1orf115/NECAB2/STK32B/SPINK2/IL6R
REACTOME_ER_TO_GOLGI_ANTEROGRADE_TRANSPORT	153	0.579361	1.87585	7.22596e-07	1.09512e-05	7.02288e-06	5315	tags=41%, list=12%, signal=36%	NAPA/TUBA4A/CD55/F5/SPTBN2/TRAPPC1/TGFA/FOLR1/TRAPPC2L/RAB1B/CD59/CNIH1/TMED3/SPTB/DCTN3/SPTBN5/TUBB2A/COPE/COG2/TRAPPC5/NSF/PPP6R1/MCFD2/TRAPPC6A/ACTR1A/TMEM115/YKT6/LMAN2L/PREB/CAPZB/ARF4/ARF3/TRAPPC3/TUBB8/GOSR2/TRAPPC4/COG1/ARF1/ACTR10/USO1/AREG/SCFD1/LMAN2/COPG1/PPP6C/DYNLL1/KDELR1/DCTN4/TUBA3E/RAB1A/TRAPPC10/GBF1/GORASP1/TUBB4A/DCTN2/NAPG/CAPZA1/COG5/SAR1B/TRAPPC9/STX5/DYNC1LI1/TMED7
REACTOME_DNA_STRAND_ELONGATION	32	-0.79956	-2.13955	7.40041e-07	1.11794e-05	7.16923e-06	3632	tags=78%, list=8%, signal=72%	LIG1/GINS2/PRIM2/PRIM1/FEN1/POLA2/POLD1/RFC1/MCM7/RFC3/GINS3/DNA2/RFC5/POLD3/POLA1/GINS1/MCM2/MCM3/MCM4/MCM8/GINS4/RFC4/MCM6/CDC45/MCM5
WARTERS_IR_RESPONSE_5GY	50	0.744242	2.04487	8.6954e-07	1.3082e-05	8.38932e-06	3804	tags=48%, list=9%, signal=44%	TNFRSF10C/AEN/CDKN1A/FDXR/GDF15/FAS/NINJ1/COQ9/HSPA4L/GASK1B/SESN1/BBC3/BLOC1S2/DDB2/MDM2/ACER2/POLH/CAVIN2/PPM1D/PLK3/WDR63/PHLDB3/TYMSOS/PIDD1
DOANE_RESPONSE_TO_ANDROGEN_UP	181	0.55479	1.83314	8.71572e-07	1.3082e-05	8.38932e-06	4300	tags=36%, list=10%, signal=33%	ARHGDIB/AEN/CLDN8/ALDH4A1/ZBTB16/PINK1/SRD5A1/NMNAT2/ACSM3/AHCY/TMPRSS2/UGT2B11/ARRB1/G6PC3/WWC1/NBPF14/GPS1/FKBP5/MCCC2/ACAA1/RRBP1/MAP11/H2BC5/GM2A/GGTLC1/HSPA4/PRKAR2B/SLC50A1/POLD4/GPRC5A/PYGB/DZIP1/MAFG/TSKU/PDK2/PREP/FASN/HSPH1/TMEM33/TSTA3/RAB3A/FMO5/C1orf116/ABCC1/RND1/NEDD4L/SIL1/CAPZB/GGT1/SMIM27/FXR2/GSTM3/S100P/ALCAM/MVK/ENDOG/TMEM8B/CROT/NSG1/SLC19A2/GSK3A/IQGAP2/CLCN3/CALR/COBL/ARHG…
ZHANG_RESPONSE_TO_IKK_INHIBITOR_AND_TNF_DN	104	-0.602905	-1.94047	8.81543e-07	1.31893e-05	8.45819e-06	4737	tags=55%, list=11%, signal=49%	RAB11FIP2/ZNF451/B3GALNT1/AUTS2/DLEU1/DCLRE1A/GGA2/GPCPD1/EFCAB7/ERF/RASL11B/KBTBD6/C12orf65/PHLPP1/WDHD1/PTHLH/CEP44/KCTD15/NFIA/DAAM1/CCNE2/C4orf19/SIM2/ORC1/ZNF362/SMC3/MSH6/LFNG/DAPK1/C1GALT1/MTUS1/KANK1/NUMA1/ARID1A/DNMT3B/SSX2IP/MPHOSPH9/E2F2/SEPTIN7/DTL/MCM10/RBL1/DDX11/RFX7/WDR60/DACH1/RFC4/RHOBTB2/SLITRK6/C17orf58/ZNF367/ATF2/CEP170/USP1/ADAMTS1/GCNT1/ZNF395
CAIRO_LIVER_DEVELOPMENT_UP	166	-0.538814	-1.84396	8.9655e-07	1.33712e-05	8.57478e-06	3479	tags=37%, list=8%, signal=34%	PTN/TGIF1/EFNB2/PTBP2/PRPH2/POGK/PITX2/WT1/SMYD2/TULP4/SYNE2/HDAC2/OBI1/PLK2/NR2F1/KCTD15/EHBP1/HMGN1/PDGFC/PXDN/NPAS2/CRABP2/MORF4L1/NNAT/TRO/RCN1/FAM174B/CBFB/RNF138/SATB1/AFAP1/TSPAN6/EVL/TRPS1/LXN/MDK/PKM/FZD2/NES/LARGE1/COL5A2/LRP12/SLC12A2/PDPN/NEO1/MYCN/CCN4/CSRP2/ADGRL2/SERPINH1/MARCKSL1/MEST/SMARCA1/WLS/TMEM47/GJA1/GJC1/SEMA3A/SEMA3D/MEX3D/PLOD2/MFAP2
HOUSTIS_ROS	36	0.790551	2.02194	9.71033e-07	1.4436e-05	9.25766e-06	2766	tags=57%, list=6%, signal=53%	GLRX/FTL/TXNRD1/PRDX1/GPX1/CYP1B1/GPX2/GSR/SOD1/HMOX2/TXNRD2/GPX4/PRDX6/TXN2/HPX/TXN/PRDX3/PRDX2/FTH1/SDC4/PRDX4
SU_TESTIS	76	-0.652062	-1.9987	9.98995e-07	1.48047e-05	9.49412e-06	4173	tags=47%, list=10%, signal=43%	PMS1/BRD1/MLLT10/TTLL5/DBF4/SFMBT1/TEKT2/SOCS7/CDKN3/ITCH/RPL39L/PIWIL1/ZNF165/STAM2/TMF1/COIL/MLF1/HMMR/OIP5/ADAM2/SYCP2/CCNB1/AURKA/KIF2C/NEK2/TOPBP1/EZH2/RFC4/NCAPH/TTK/TLE4/CCNB2/CDK1/BUB1/SOX5/BUB1B
BILD_MYC_ONCOGENIC_SIGNATURE	204	0.52915	1.75762	1.04579e-06	1.54494e-05	9.90753e-06	4619	tags=45%, list=11%, signal=40%	H2AC6/ATIC/HSPD1/AIMP2/SNHG16/RCL1/TMEM97/SFXN4/ALDH1B1/NOP16/CCDC86/MYBBP1A/BOP1/PC/YPEL3/PHB/SRM/TTLL12/C20orf27/FARSA/GPD1L/ARNTL/UBE2D4/MCRIP2/EXOSC5/PA2G4/ALG3/RPP40/EEF1AKMT4/PDP1/FARSB/SCFD2/TNFAIP2/TFB2M/RRP9/NOL6/ALS2CL/GPRC5A/WDR12/PES1/RHBDF1/WDR74/MICAL1/TAF4B/NPM1/GPATCH4/UBALD1/PNPT1/HS6ST2/KRTAP2-3/IMP4/DHRS1/FAM86C1/MRTO4/DPH1/MON1A/PAICS/DUSP22/CCDC78/TWNK/BID/ADGRF1/RABEPK/GNL3/…
ALCALAY_AML_BY_NPM1_LOCALIZATION_DN	184	-0.523804	-1.81011	1.07748e-06	1.58674e-05	1.01756e-05	3687	tags=39%, list=8%, signal=36%	OGG1/CDKN3/MLLT3/PBX2/TRAK2/HOMER2/EXO1/B4GALT6/TYMS/RSAD2/POLD1/DAAM1/CDC20/MAN1A1/HMMR/HNRNPA3/PLXNC1/SLC1A4/WDR62/CCNB1/HNRNPD/CCNF/CDC6/SERPINI1/CHAF1A/CD200/DDX60/CDKN2C/EVL/KIF2C/MAD2L1/USP13/MCM2/RRM2/MCM10/CSGALNACT1/CYFIP2/MDFIC/SHCBP1/IFITM1/IFITM2/MCM4/GPX7/POLE/VEGFA/TRIB2/ACAA2/NCAPH/CDC25C/CKS1B/PITPNC1/MKI67/CCNB2/SPARC/PROM1/CHEK1/BIRC5/FOXM1/TK1/KIF4A/IDH2/DLGAP5/PTTG1/TPX2/PLAGL…
MCLACHLAN_DENTAL_CARIES_DN	82	-0.631497	-1.96352	1.19355e-06	1.75216e-05	1.12364e-05	5405	tags=41%, list=12%, signal=36%	LTBP1/PER2/CDH12/LGR4/GPR37/KIT/GLCE/SYT1/PLCL1/XIST/PHLPP1/PLK2/TRIM2/TUBB2B/ANK3/NUDT4/ADGRG2/ADIRF/POLI/PCDH9/PGAP1/MDK/CYFIP2/SPOCK3/EGR1/NAP1L3/PHIP/TMEM255A/SORBS2/CD24/SLIT2/TIAM1/GPC3/H3-3B
BROWNE_HCMV_INFECTION_1HR_UP	50	-0.725725	-2.0874	1.19804e-06	1.75325e-05	1.12434e-05	2430	tags=38%, list=6%, signal=36%	ZBTB22/NFIA/ONECUT1/AFF2/IL6/KLHL23/ATP2B4/MMP14/BRD3/MAZ/STUM/CLGN/PCDH7/CXCL1/FGFR3/SOX5/CXCL8/SEMA3D/CXCL2
SHEPARD_BMYB_MORPHOLINO_UP	208	0.53666	1.78826	1.21074e-06	1.76632e-05	1.13272e-05	5568	tags=45%, list=13%, signal=39%	HPGD/IFI30/FBXO32/RAB3C/CCNG1/AIMP2/PRDX1/BAX/FST/ATP1A1/EPDR1/CNDP2/RIOX2/GCSH/DNAJA3/RPS27/SND1/AK3/MRM1/RIOK3/PLEKHB2/TRIM16/HM13/VAMP7/PTGES2/PSME1/REXO2/SQSTM1/POLR1C/MDM2/ZNF598/DOHH/MTRES1/ZNF622/GYG1/PGAM1/STARD3/MRPS18B/NSUN5/OLA1/GNS/TEX264/GLUD1/BGN/GMPR/EIF4E/KRT18/TIMP2/SSB/TPD52L2/FAM207A/DNAJA2/SDF2L1/WDR43/HTRA2/ZNF330/SLC16A6/HSP90AA1/SLC31A1/ARRDC3/NCLN/WNT11/PSMF1/NUDT9/PLAA/ST…
IVANOVA_HEMATOPOIESIS_INTERMEDIATE_PROGENITOR	134	0.591699	1.89452	1.21942e-06	1.77347e-05	1.13731e-05	4568	tags=46%, list=11%, signal=42%	PAPSS2/MAOA/WDR77/CITED2/MRPS25/AHCY/TMEM97/SFXN4/GCNT3/MRPL12/GFM1/CCNQ/SCO1/GTF3A/EIF6/CISD1/BLOC1S2/ARMT1/GTPBP8/EEF1B2/RASSF4/RSU1/AAGAB/PES1/PCCA/MAPKAPK3/MDH1/C7orf50/PGAM1/PSMA3/SLC35B2/COMMD10/MRPS35/TBRG4/TEX2/SDF2L1/QARS1/PLAC8/BID/ATP6AP2/CHCHD4/PARL/DDX20/RABEPK/TRMT6/ENOPH1/SURF6/YDJC/NIPSNAP3A/PLAA/CEBPZ/POLR3E/TMEM186/PRAG1/LMAN2/C12orf10/DNLZ/NOC3L/DHX37/ZNF706/NEBL/WDR73
REACTOME_BRANCHED_CHAIN_AMINO_ACID_CATABOLISM	21	0.864782	2.02716	1.28686e-06	1.86575e-05	1.19649e-05	2813	tags=76%, list=6%, signal=71%	ACAD8/ACADSB/ACAT1/ALDH6A1/HSD17B10/MCCC1/ECHS1/MCCC2/BCAT2/DLD/PPM1K/BCKDHB/BCKDHA/HIBADH/HIBCH/DBT
REACTOME_REGULATION_OF_RAS_BY_GAPS	68	0.695427	2.01467	1.33024e-06	1.92268e-05	1.233e-05	4432	tags=65%, list=10%, signal=58%	PSME2/PSMD8/RPS27A/PSMA7/PSME1/PSMD1/PSMB5/PSMB6/PSMD9/PSMB10/PSMD14/PSMC4/SPRED3/PSMA6/PSMD2/PSMD7/PSMA3/UBA52/PSMB4/PSMD13/UBB/PSMB1/PSMA5/PSMD4/PSMC2/PSMA4/PSMB7/PSMA2/PSMD6/PSMB3/CUL3/PSME3/PSMC3/HRAS/PSMC1/PSMB2/PSMF1/PSMD11/PSMC6/PSMC5/SEM1/PSMD12/PSMB8/PSMD3
REACTOME_REGULATION_OF_RUNX3_EXPRESSION_AND_ACTIVITY	55	0.726554	2.01772	1.38013e-06	1.9765e-05	1.26751e-05	4432	tags=76%, list=10%, signal=69%	PSME2/PSMD8/RPS27A/PSMA7/PSME1/PSMD1/PSMB5/MDM2/PSMB6/PSMD9/PSMB10/PSMD14/PSMC4/PSMA6/PSMD2/PSMD7/PSMA3/UBA52/PSMB4/PSMD13/UBB/PSMB1/PSMA5/PSMD4/PSMC2/PSMA4/PSMB7/PSMA2/PSMD6/PSMB3/PSME3/PSMC3/PSMC1/PSMB2/PSMF1/PSMD11/PSMC6/PSMC5/SEM1/PSMD12/PSMB8/PSMD3
REACTOME_PYRUVATE_METABOLISM_AND_CITRIC_ACID_TCA_CYCLE	55	0.726299	2.01702	1.38013e-06	1.9765e-05	1.26751e-05	3825	tags=62%, list=9%, signal=56%	PDK4/MPC1/ACO2/IDH3A/ME1/VDAC1/FH/SUCLG1/PDHX/SDHB/MDH2/SDHA/LDHB/SUCLG2/HAGH/OGDH/CS/SDHD/DLD/PDP1/PDHA1/PDHB/SDHC/FAHD1/PDK2/SUCLA2/IDH3G/ME3/IDH3B/MPC2/BSG/ME2/ADHFE1/DLST
MONNIER_POSTRADIATION_TUMOR_ESCAPE_UP	402	0.457946	1.61392	1.37222e-06	1.9765e-05	1.26751e-05	5757	tags=38%, list=13%, signal=34%	NQO1/AEN/ZMAT3/GLDC/TXNRD1/DEPTOR/AHRR/ERGIC1/G6PD/AK1/SLC7A6/SLC48A1/SCAP/MRPL15/POLDIP2/EPB41L1/ADIPOR1/ATP1A1/GSR/MYBBP1A/BOP1/PC/WDR46/PRKCA/VAT1/AKAP1/ZMPSTE24/TXN2/SRM/HSPA4L/NEAT1/PABPC4/KAT2A/GCLC/GPD1L/RACK1/PA2G4/HSPA4/RAB5C/PPIF/PRKAR2B/DDX54/TNFAIP2/ZMYND19/NNMT/RRP12/AKR1B1/FAM83G/LETMD1/LETM1/VPS33A/GSPT1/STRAP/MAP4K4/PGD/EIF4G1/LONP1/SENP3/MAFG/NOP9/ZDHHC3/TBRG4/EIF3B/SLC25A10/ELAC…
KEGG_PROPANOATE_METABOLISM	33	0.79928	2.0128	1.41457e-06	2.01351e-05	1.29124e-05	3226	tags=64%, list=7%, signal=59%	ACAT1/ALDH2/ALDH6A1/ECHS1/ALDH1B1/SUCLG1/PCCB/ACSS1/HADHA/ACADM/LDHB/SUCLG2/MMUT/PCCA/ACSS3/SUCLA2/MLYCD/ALDH9A1/HIBCH/MCEE/ACSS2
QUINTENS_EMBRYONIC_BRAIN_RESPONSE_TO_IR	83	0.658393	1.97307	1.41305e-06	2.01351e-05	1.29124e-05	4443	tags=47%, list=10%, signal=42%	PDK4/AEN/CDKN1A/DDIT4L/EDA2R/ZMAT3/PVT1/DCXR/INKA2/FAS/CCNG1/EI24/BAX/H2AJ/SESN2/EPHX1/TM7SF3/DGLUCY/PHLDA3/BBC3/HPCAL1/BLOC1S2/RAP2A/BAIAP2/ZNF750/MAPKAPK3/TNFRSF10A/CGREF1/NR1D1/RHBDF2/TAP1/PPM1D/CEP170B/SLC19A2/PIDD1/C9orf116/DCAF4/CPT1C/DENND2C
REACTOME_HOST_INTERACTIONS_OF_HIV_FACTORS	131	0.595953	1.90235	1.44566e-06	2.05153e-05	1.31562e-05	4432	tags=47%, list=10%, signal=42%	SLC25A6/PSME2/SLC25A5/PSMD8/AP1S1/SLC25A4/AP2A1/ATP6V1H/ELMO1/ELOB/RPS27A/PSMA7/AP1B1/AP1M2/AP2S1/PSME1/PSMD1/PSMB5/PSMB6/PSMD9/PSMB10/PSMD14/PSMC4/PSMA6/PSMD2/PSMD7/ELOC/AP2M1/SKP1/NPM1/PSMA3/UBA52/PSMB4/KPNA1/PSMD13/RANGAP1/UBB/PSMB1/PSMA5/PSMD4/PSMC2/PSMA4/PSMB7/PSMA2/PSMD6/PSMB3/PSME3/PSMC3/PSMC1/ARF1/PSMB2/PSMF1/PSMD11/NUP88/PSMC6/PSMC5/PPIA/SEM1/PSMD12/PSMB8/PSMD3
LIANG_SILENCED_BY_METHYLATION_DN	11	-0.935703	-1.92609	1.48794e-06	2.10514e-05	1.35001e-05	1060	tags=91%, list=2%, signal=89%	CDKN3/MCM2/TMSB15A/EZH2/PCLAF/MKI67/FOXM1/CCNA2/HMGB2/KIF11
CAIRO_HEPATOBLASTOMA_DN	262	0.502174	1.71325	1.51465e-06	2.13647e-05	1.3701e-05	3713	tags=30%, list=9%, signal=27%	CYP2B7P/PAPSS2/HPGD/CYP2A6/MPC1/HAL/SRD5A1/ACAT1/PEMT/CDA/CPT2/PLAAT3/CFP/RCL1/TMPRSS2/VIPR1/DDT/FOXO1/SLC46A3/CYP39A1/SDHB/ACADM/HPX/ALPL/SLC1A1/ACAA1/PPARGC1A/SUCLG2/SLC38A4/HAGH/MMUT/SCP2/GOT1/NNMT/SLC25A15/INPP1/ABLIM3/CDC37L1/CYP2J2/PTS/NAT2/ADK/CRP/GCDH/SLC27A5/TSKU/PON1/DHRS1/SLC20A1/CYP2B6/IL13RA2/KCND3/ASL/ASS1/MAP2K3/ALDOB/LONP2/DHTKD1/GLS2/AKR1D1/ST3GAL6/ADH1C/NQO2/CYP1A2/ACSL1/CTPS1/A…
SHETH_LIVER_CANCER_VS_TXNIP_LOSS_PAM4	273	0.492939	1.68658	1.53414e-06	2.15128e-05	1.37959e-05	6348	tags=40%, list=15%, signal=35%	ITGA9/ACAD8/HPGD/ACADSB/ACAT1/ALDH6A1/DCXR/RNASEK/TGFBI/GPX1/AHCY/BAAT/EPDR1/NDUFB9/MACROD1/CRYAB/DDX49/MTCH2/PNKD/SUGCT/PRLR/SCNN1A/HEBP1/IDH1/SUCLG2/KIFC2/HAGH/ATAD3A/PARK7/COQ8A/QDPR/GOT1/EDNRA/ALDH1A1/SLC25A51/SLC25A15/DSCAML1/CYP2J2/EPHX2/NAT2/PCCA/PRKAG2/MDH1/TERF2IP/RMDN3/GCDH/SLC27A5/PMPCB/ASL/ABHD3/ADAMDEC1/RAB3A/PAICS/HACL1/HIBADH/CHCHD7/EFEMP1/GABRE/ALDH9A1/ETHE1/GSTO1/DCN/AKR1D1/GAS2/…
BENPORATH_OCT4_TARGETS	288	-0.452706	-1.65113	1.53433e-06	2.15128e-05	1.37959e-05	4407	tags=33%, list=10%, signal=30%	OGA/SPRED1/STAT3/HMG20A/MLLT10/JUND/DKK1/RBM22/LRAT/CACNA2D1/B3GALT4/CDK17/KIAA1143/EXOSC9/JARID2/LINGO1/RIC8B/GTF3C4/OBI1/TNRC6A/PDCL/SKA2/PPP2R3A/CNTNAP3/DTNA/BAMBI/SFRP1/DBR1/KAT6A/RIF1/SET/AASDH/JADE1/TNC/MED12/SPAG9/MAP3K3/SKIL/ORC1/REST/TGIF2/TMEM170A/TCF12/SRSF4/ANO8/KANK1/KCNMB4/ADD3/TCF4/TRIM24/TRA2A/MMP2/BLCAP/FUS/GATA6/TRPS1/DNAJC9/OSR1/HHEX/NUCKS1/GRID2/SMARCAD1/PRPF38A/WEE1/CDC7/MYEF…
SWEET_KRAS_ONCOGENIC_SIGNATURE	89	0.647318	1.96355	1.54513e-06	2.15995e-05	1.38515e-05	5082	tags=51%, list=12%, signal=45%	GLRX/CDKN1A/SLC25A5/CITED2/TGFBI/RPL3/EEF2/RPS2/CST3/RPL14/SFTPB/RPL8/BOP1/ATP5PB/LCN2/SND1/PABPC1/RACK1/ITGB2/EEF1B2/PCBD1/RABGGTB/EEF1D/RPL6/EIF3E/GNS/HPN/TSTA3/PHB2/KRT18/CCND1/MT2A/UBXN1/BSG/CEACAM1/HIF1A/NUP88/MAPK1/KDELR1/FKBP2/VASP/MTIF2/ATP1B1/SHC1/NMT1
VERHAAK_GLIOBLASTOMA_PRONEURAL	176	-0.522133	-1.79817	1.55818e-06	2.17171e-05	1.39269e-05	5559	tags=40%, list=13%, signal=35%	CHD7/ZNF510/MAP2/CELF3/DGKI/NOL4/KAT7/TMCC1/SCG3/TAF5/LRRTM4/MYB/CDC25A/DLL3/KDM1A/PODXL2/MMP16/BEX1/ZNF821/CNTN1/NLGN3/SCN3A/ATAT1/ZNF286A/HDAC2/PHLPP1/SLCO5A1/BCL7A/REXO5/CAMSAP2/FGF9/ARHGAP33/INAVA/MARCKS/RAD21/MATR3/AMOTL2/RALGPS1/PELI1/SATB1/ZNF184/ZFP69B/SOX11/ASCL1/YPEL1/TMEFF1/REEP1/GRID2/GSTA4/MCM10/CDC7/TOPBP1/TMSB15A/DBN1/ATAD5/MTSS1/STMN1/TMEM35A/CLGN/SOX2/PDE10A/RALGPS2/MARCKSL1/VEZF…
LI_WILMS_TUMOR_ANAPLASTIC_UP	17	-0.885341	-2.05964	1.5882e-06	2.20699e-05	1.41532e-05	3150	tags=76%, list=7%, signal=71%	PCGF3/RFC3/KPNA2/KIF2C/RFC4/NCAPH/RAD54L/CENPA/TTK/MKI67/CENPF/CDCA3/NUSAP1
CHARAFE_BREAST_CANCER_LUMINAL_VS_MESENCHYMAL_UP	448	0.453378	1.6163	1.62719e-06	2.25448e-05	1.44578e-05	4654	tags=34%, list=11%, signal=31%	TMEM229B/CYP4B1/ALDH4A1/EMP2/PROM2/ALDH6A1/USP18/FGD3/PDCD4/MRPL41/RAB17/TTC39A/TMPRSS2/VIPR1/KRT23/CEBPA/EPN3/MEGF9/H2AJ/ABCA12/TSC22D3/ANXA9/SYNGR2/CYB5A/SLC7A8/LMTK3/MLPH/MCCC2/PRLR/TM7SF2/GPD1L/ARRDC4/MCRIP2/KIFC2/PRR15L/AP1M2/SCAMP2/ROGDI/ATP6AP1/TSTD1/NPDC1/BLVRB/TMED3/RHOB/MARVELD3/TPD52L1/STARD10/C1orf43/TMEM125/CLN3/C9orf152/PPM1H/JTB/ABHD11/CACNA1D/PEX11B/DDI2/CRYBG2/EFHD1/GSPT1/AAGAB/A…
REACTOME_INSULIN_RECEPTOR_RECYCLING	24	0.836994	2.01295	1.78462e-06	2.46039e-05	1.57782e-05	3111	tags=71%, list=7%, signal=66%	ATP6V1A/ATP6V0D1/ATP6V1E1/ATP6V0B/ATP6V0A4/ATP6V1H/ATP6V1F/ATP6V1D/ATP6V0E1/ATP6V1B2/ATP6V0C/ATP6AP1/ATP6V1C1/ATP6V0A1/ATP6V1G1/ATP6V1G2/ATP6V0E2
REACTOME_ASSEMBLY_OF_COLLAGEN_FIBRILS_AND_OTHER_MULTIMERIC_STRUCTURES	61	-0.690946	-2.04689	1.78632e-06	2.46039e-05	1.57782e-05	4366	tags=48%, list=10%, signal=43%	COL9A1/COL4A3/COL4A4/ITGB4/LOXL2/COL27A1/PXDN/COL5A1/COL4A6/LOXL1/ITGA6/COL1A2/CTSS/COL1A1/COL14A1/COL7A1/LAMC2/COL5A2/COL18A1/COL3A1/COL2A1/CTSV/LAMA3/COL4A2/COL11A1/COL12A1/COL4A1/LOX/COL9A2
TARTE_PLASMA_CELL_VS_PLASMABLAST_DN	306	0.483739	1.67047	1.89069e-06	2.59652e-05	1.66512e-05	4487	tags=43%, list=10%, signal=39%	ARHGDIB/CDKN1A/HPGD/GLDC/ACTA2/IFI30/RIPOR2/PSME2/TKT/TUBA4A/ATIC/VDAC1/HSD17B10/FAS/SCAP/AIMP2/MSN/AHCY/TMEM97/TRAP1/FH/OAT/CYCS/NDUFS1/ACOT7/BOP1/YARS1/CCT5/MVP/HSPE1/ELMO1/EBNA1BP2/SDHB/NME1/MRPL12/PHB/MPHOSPH6/ATP5PB/ATP5PF/ATP1B3/TIMM17A/UCHL3/LDHB/COX6C/GARS1/HSPA9/CCT7/HSPA4/PPIF/PTPN1/WARS1/NDUFV2/TXN/SLC25A46/UQCRC2/ABCD3/MYO5A/UQCRH/CCT6A/PSMD14/OSTF1/BAG1/GSPT1/MRPL3/CCND2/EIF2S1/MAPKA…
REACTOME_REGULATION_OF_PTEN_STABILITY_AND_ACTIVITY	69	0.68601	1.99347	1.92092e-06	2.63031e-05	1.68679e-05	4846	tags=67%, list=11%, signal=59%	PSME2/PSMD8/RPS27A/PSMA7/STUB1/PSME1/PSMD1/PSMB5/PSMB6/PSMD9/PSMB10/PSMD14/PSMC4/PSMA6/PSMD2/PSMD7/CSNK2B/PSMA3/UBA52/PSMB4/PSMD13/UBB/PSMB1/TRIM27/PSMA5/PSMD4/PSMC2/PSMA4/PSMB7/PSMA2/PSMD6/PSMB3/PSME3/PSMC3/PSMC1/PSMB2/PSMF1/PSMD11/PSMC6/PSMC5/SEM1/PSMD12/PSMB8/PSMD3/CSNK2A2/PSMB9
REACTOME_ACTIVATION_OF_ATR_IN_RESPONSE_TO_REPLICATION_STRESS	37	-0.757995	-2.08495	1.92893e-06	2.63358e-05	1.68889e-05	1958	tags=65%, list=5%, signal=62%	ORC2/RAD9A/CDC25A/DBF4/RAD9B/ORC1/MCM7/RFC3/CLSPN/CDC6/RFC5/MCM2/MCM10/CDC7/MCM3/MCM4/MCM8/RFC4/MCM6/CDC45/CDC25C/MCM5/CHEK1/CDK2
REACTOME_METABOLISM_OF_VITAMINS_AND_COFACTORS	188	0.53993	1.78785	1.98528e-06	2.70264e-05	1.73317e-05	5915	tags=45%, list=14%, signal=39%	TCN1/AKR1B10/AKR1C1/NMNAT2/TCN2/NT5E/MCCC1/APOB/ACP5/NFS1/PCCB/PC/CYB5A/CALM1/RETSAT/NAXE/COQ9/HSPG2/MCCC2/SLC52A2/APOE/NADK/IDH1/AKR1C3/MMUT/SLC25A16/NNMT/GPC5/PTS/QPRT/PCCA/PARP9/NADSYN1/RBP4/PDSS2/FASN/LRP10/MOCS1/SDC4/ABCC1/GSTO1/COQ6/NAXD/GPHN/PPCS/SPR/MOCS3/FLAD1/RFK/MTHFD1L/MTHFS/HSP90AA1/FPGS/MOCS2/APOA2/MTHFR/NAMPT/SLC19A2/COQ5/SLC19A1/SDC1/MTHFD1/SHMT1/GPC4/PDSS1/CD320/PDZD11/SLC46A1/AA…
NABA_COLLAGENS	44	-0.752388	-2.13947	2.02769e-06	2.74441e-05	1.75996e-05	4366	tags=48%, list=10%, signal=43%	COL9A1/COL4A3/COL4A4/COL27A1/COL5A1/COL4A6/COL1A2/COL1A1/COL14A1/COL7A1/COL5A2/COL18A1/COL16A1/COL3A1/COL2A1/COL19A1/COL4A2/COL11A1/COL12A1/COL4A1/COL9A2
REACTOME_COLLAGEN_CHAIN_TRIMERIZATION	44	-0.752388	-2.13947	2.02769e-06	2.74441e-05	1.75996e-05	4366	tags=48%, list=10%, signal=43%	COL9A1/COL4A3/COL4A4/COL27A1/COL5A1/COL4A6/COL1A2/COL1A1/COL14A1/COL7A1/COL5A2/COL18A1/COL16A1/COL3A1/COL2A1/COL19A1/COL4A2/COL11A1/COL12A1/COL4A1/COL9A2
YAO_TEMPORAL_RESPONSE_TO_PROGESTERONE_CLUSTER_11	100	0.623746	1.91542	2.12763e-06	2.87138e-05	1.84139e-05	5130	tags=61%, list=12%, signal=54%	RIPOR2/RRS1/CYCS/ACOT7/BOP1/TMEM9B/SRM/DDX21/AMD1/NIFK/PNO1/PA2G4/MARS1/FARSB/PLA2G10/HSPA5/TUBB2A/SLC35B1/NDUFAF4/RRAGA/GSPT1/STRAP/BYSL/MRTO4/DUS1L/IL13RA2/ABCE1/NPL/TNFRSF21/LTV1/PSME3/GNL3/UTP4/PUM3/BECN1/HIF1A/PUS1/RANGRF/METTL1/XPNPEP1/STIP1/AREG/TIMM8A/LRRC59/UBQLN1/DNAJB11/EPRS1/SEC23B/PPAN/IPO7/NOP56/TFRC/AK6/DDX51/EPB41/STX12/PELO/NCBP1/SELENOS/TARS1/TSR1
REACTOME_UB_SPECIFIC_PROCESSING_PROTEASES	198	0.534847	1.7725	2.41164e-06	3.24197e-05	2.07904e-05	4846	tags=43%, list=11%, signal=39%	H2AC6/PSME2/USP18/H2BC21/VDAC1/H2BC12/PSMD8/ARRB1/VDAC2/H2BC4/RPS27A/KAT2A/PSMA7/RNF123/H2BC5/PSME1/PSMD1/FKBP8/PSMB5/DDB2/TOMM20/MDM2/PSMB6/H2BC8/PSMD9/PSMB10/PSMD14/PSMC4/H2AC19/TAF10/PSMA6/PSMD2/PSMD7/PSMA3/UBA52/PSMB4/TOMM70/PSMD13/ADRM1/KEAP1/UBB/PSMB1/RNF128/PSMA5/PSMD4/PSMC2/PSMA4/PSMB7/MUL1/PSMA2/RHOT1/PSMD6/PSMB3/H2BC18/PSME3/USP15/PSMC3/PSMC1/H2BC15/PTRH2/BECN1/HIF1A/PSMB2/UFD1/PSMF1/PS…
BOQUEST_STEM_CELL_CULTURED_VS_FRESH_UP	426	-0.412176	-1.54858	2.41608e-06	3.24197e-05	2.07904e-05	3481	tags=29%, list=8%, signal=27%	IRF1/ANGPTL4/PPARG/LMO3/STC2/FXYD1/DOK5/LPL/SLC38A1/LOXL2/SLC16A3/ATF5/MYC/SPRY1/ABI3BP/TGFBR3/RGS5/ANKRD36B/ZBTB10/RGS4/MAN1A1/ZBTB20/SLC43A3/EGFR/SELENOP/REL/CFI/PPP1R15A/ADGRG2/GUCY1B1/IFIH1/SLC1A4/IL33/RHOBTB1/GUCY1A1/MET/TP53BP2/SPRY2/CTSS/GLS/ANG/MOCOS/ENPEP/MTUS1/MYBL1/CLIC3/TPM4/PELI1/NFIB/FRMD4B/LRRC8B/ANGPTL2/TMEM135/TNFAIP3/COL14A1/AGTR1/CLMN/PGK1/CCNL1/TLR3/RRM2/COCH/PPP1R12B/LTBP4/FG…
KEGG_CELL_CYCLE	124	-0.578689	-1.91242	2.4292e-06	3.25027e-05	2.08436e-05	4581	tags=47%, list=11%, signal=42%	SMC1A/SMC1B/PKMYT1/CDC25A/RBL2/CREBBP/ESPL1/RB1/ZBTB17/DBF4/FZR1/YWHAH/HDAC2/MYC/STAG2/YWHAZ/ABL1/CDC20/CCNE2/CDC23/TGFB3/SFN/ORC1/MCM7/SMC3/RAD21/CCNB1/EP300/CDC6/ATM/PLK1/E2F2/CDKN2C/MAD2L1/STAG1/MCM2/WEE1/CDC7/SMAD4/RBL1/MCM3/MCM4/MCM6/CDC45/CDKN2A/CDC25C/TTK/CCNB2/MCM5/CDK1/CHEK1/BUB1/CDK2/PTTG1/CCNA2/SKP2/BUB1B/CDKN1C
ZHENG_BOUND_BY_FOXP3	480	-0.404358	-1.53003	2.50186e-06	3.33795e-05	2.14059e-05	6277	tags=38%, list=14%, signal=33%	CCDC198/ATP2B1/VPS37B/USF3/IRF2/NRP1/PTGER2/TBC1D5/RFX3/B3GNT2/FLI1/GPD2/KDM3A/TSPAN13/SPTBN1/TG/CHD7/GATA3/C15orf48/ETS1/NCOA3/ARHGAP5/L3MBTL3/CELF2/CYTH1/PTPRC/ARID5B/RAB19/TRAF3IP3/DUSP6/VPS54/FOXP1/NR2E3/GPRIN3/TMEM71/RDM1/TLK1/CPOX/ECI2/BCL11B/MS4A7/RBL2/TMEM67/FRS2/HMG20A/ARHGEF3/PPP3CC/DAPL1/ZFP91/RB1/DOCK10/LARS1/GPR183/ZDHHC20/MYNN/TBC1D4/MBNL1/LTA4H/BCL2/ANKRD11/SCN8A/CDK17/IL6ST/ZBTB2/…
MULLIGHAN_MLL_SIGNATURE_2_UP	417	0.449945	1.59464	2.54122e-06	3.38083e-05	2.16809e-05	5506	tags=38%, list=13%, signal=33%	HTATIP2/BATF/TFEB/SMPD1/MFSD1/ISOC2/CCND3/EML2/CEBPA/PRKCD/COX8A/DDT/SYNGR2/NXPE3/NDUFS7/DDX49/CTSA/TGFA/SLC52A2/ATP6V1D/ATP6V0E1/RRBP1/PLA2G4A/ARNTL/SPG21/NDUFB8/ATG3/PMM1/CD302/PLEKHB2/RER1/CCR1/SDHD/PPIF/ITGB2/STS/RNF167/TNFAIP2/MAP2K2/NINJ2/RASSF4/CLTB/SDF4/CLN3/GAA/TBCD/TOLLIP/GRN/POLD4/SMCO4/TRABD/TNFRSF10B/MSRB1/GRB2/ALAD/MICAL1/PITPNA/KPNA1/KYNU/DEXI/TIMM17B/RAB29/GNS/RANGAP1/FRAT2/FAM120…
REACTOME_PROCESSING_OF_CAPPED_INTRON_CONTAINING_PRE_MRNA	242	-0.47664	-1.69696	2.61233e-06	3.4656e-05	2.22245e-05	6845	tags=45%, list=16%, signal=38%	SNW1/CRNKL1/POM121/SLBP/SF3A1/SMNDC1/SRSF7/SNRNP200/AAAS/CDC40/PHF5A/SF3A2/DHX38/ISY1/SNRPA/WBP4/DDX23/CSTF2T/RBM5/NUP93/PCF11/ELAVL1/DHX9/GCFC2/WTAP/THOC2/DDX42/PPIL6/POM121C/ALYREF/CDC5L/HNRNPC/DDX5/HNRNPA1/WBP11/RBM22/METTL14/LSM2/PCBP1/NUP85/PPIL4/PCBP2/SNRPA1/DHX15/NUDT21/RBM8A/SF3B1/U2SURP/SF3B3/DDX39B/NUP37/CWC22/CCAR1/NXF1/WDR33/PRPF8/HNRNPF/HNRNPA2B1/SRSF2/NUP160/SNRNP40/TRA2B/PRPF3/SRSF…
ZWANG_DOWN_BY_2ND_EGF_PULSE	282	-0.457064	-1.65829	2.62698e-06	3.47519e-05	2.2286e-05	5607	tags=37%, list=13%, signal=32%	GALNT16/ZNF429/ZNF510/CIART/ZNF587/SLX4/LINC00174/IFI44/PIK3IP1/BTG2/F8/EPM2AIP1/TAS2R31/PEX11A/ZNF805/KCTD7/DISP1/ZNF138/ZNF33A/ZNF493/TEX45/FIGN/GLIDR/ZNF714/ARL17A/RECK/CTSK/DCLRE1A/TMTC4/MTX3/LINC02210/CARF/PDIK1L/CENPL/ZNF740/ZNF431/ZFP62/ZNF646/WDR89/RASL11B/STC2/DET1/ZNF470/DCLRE1C/SUV39H1/E2F8/C12orf65/FAM72C/DEPDC7/DPY19L2P2/BRD8/GOLGA2P10/PIK3C2B/GMPPB/ZNF687/ZNF483/HILPDA/ZNF302/PUM1/A…
MEISSNER_NPC_HCP_WITH_H3K4ME2	486	-0.40462	-1.53229	2.75571e-06	3.6352e-05	2.33122e-05	6033	tags=31%, list=14%, signal=27%	NKX6-2/ANK1/CIB2/ARHGEF25/BRSK2/ZNF804A/TC2N/CYS1/FAM20A/SLC2A4/NPR2/LSR/GRHL3/SYT13/DUSP18/KCNE5/GATA3/PERP/COMP/TLL2/TAGLN2/SETD6/GDA/GRIK4/SLC4A3/IL13RA1/CARD10/TRPV4/LHFPL4/ARVCF/GNAZ/MND1/CHD5/RFX2/MFSD4B/EPOP/C16orf74/DLL3/CPXM1/LRRC3B/GNAL/LTK/NET1/B3GALT4/LGI2/NRTN/RAMP2/PARP12/AVPR1A/KCNJ8/YBX2/LOXL2/ADAMTSL4/RTL6/HFM1/LY75/KCNJ10/EFNA2/SLCO5A1/PTHLH/FA2H/CPLX2/SMAD9/ITPKA/KCTD15/AGBL4/F…
JOHNSTONE_PARVB_TARGETS_2_DN	340	-0.43836	-1.61658	2.77937e-06	3.65612e-05	2.34463e-05	5438	tags=40%, list=13%, signal=36%	MAP2/TMTC3/MOB1B/PPP2R5E/PLPP3/RAP2B/HNRNPLL/RBM26/EPM2AIP1/TDP2/ISOC1/SHISA2/OGFOD3/CDC5L/ZNF623/SOCS5/UFL1/FIGN/RIN2/GORAB/SGPL1/ECI2/SMIM13/B3GALNT1/DEF6/NR2F1-AS1/ARPP19/PRPF39/LINC01578/PARVA/SYNCRIP/DPYD/NET1/ASPH/GLCE/OPA1/MBNL1/PDIK1L/BACE2/PRPF4B/TPT1-AS1/PRIM2/TTC39C/SLC25A40/SMURF2/RREB1/DHX15/NUDT21/PNRC2/ZNF83/ZMYM1/RBMS3/SOAT1/RASA2/SPRY1/LEMD3/ARHGEF10/NUFIP2/TMEM14A/S100PBP/CAP2/C…
KAUFFMANN_DNA_REPLICATION_GENES	145	-0.546723	-1.83475	2.89421e-06	3.79652e-05	2.43467e-05	5408	tags=49%, list=12%, signal=43%	ORC2/RAD9A/POLE2/RPA4/KAT7/CCL2/PPP2R3B/NFIC/SMC1A/LIG1/CENPE/LIG3/GINS2/PRIM2/PNKP/TEP1/SUV39H1/FEN1/WDR33/NCOA6/POLA2/POLD1/RFC1/SET/POLM/NFIA/POLG/CHAF1B/CHTF18/ORC1/CHRAC1/MCM3AP/TNIP1/MCM7/RBMS1/RFC3/MCM9/SMC3/POLI/RRM1/BRCA1/CDC6/NFIB/RFC5/CHAF1A/POLQ/MSH2/POLD3/POLA1/MCM2/GMNN/BLM/RRM2/CDC7/TOPBP1/MCM3/MCM4/MCM8/RFC4/NFIX/MCM6/CDC45/SMC4/SMC2/MCM5/CENPF/TYMP/CDK2/PTTG1/CXCL8/DEK
PAL_PRMT5_TARGETS_UP	203	-0.492709	-1.73324	2.91278e-06	3.81021e-05	2.44344e-05	3908	tags=40%, list=9%, signal=36%	CALM3/LSM2/GTF2I/NFKB1/NUP85/PTN/HELLS/TRIP13/PRIM2/PRIM1/CPNE1/NR2F1/TYMS/PROS1/HMGN2/SET/LARP7/CDC20/NONO/HAUS6/LOXL1/PBRM1/CHRAC1/MARCKS/MET/HNRNPL/HAUS3/SRSF1/SRSF6/DOCK7/ANP32B/CAPG/KPNA2/RRM1/PSIP1/NFIB/RFC5/GUSB/UHRF1/EVL/SMARCE1/ILF3/EMP3/MCM2/GMNN/FIGNL1/CASP8AP2/RBL1/ECT2/TOPBP1/MCM4/H2AZ2/EIF4G2/C1R/RACGAP1/INCENP/PCLAF/PKD2/STMN1/P3H3/CDC25C/CKS1B/NDE1/TTK/H2AX/TIA1/MKI67/CCNB2/TACC3/…
PID_FANCONI_PATHWAY	47	-0.719782	-2.06003	2.93073e-06	3.82301e-05	2.45165e-05	3526	tags=57%, list=8%, signal=53%	RAD9A/FANCF/FAAP24/FANCM/TOP3A/NBN/MRE11/FANCC/RFC3/FANCA/FANCL/BRCA2/XRCC3/BRCA1/RFC5/ATM/FANCG/BLM/FANCD2/FANCI/TOPBP1/UBE2T/RFC4/H2AX/BRIP1/USP1/CHEK1
SMID_BREAST_CANCER_RELAPSE_IN_BONE_DN	302	-0.449815	-1.65564	3.03835e-06	3.94144e-05	2.5276e-05	3306	tags=29%, list=8%, signal=27%	VGLL1/SLC16A1/ODAM/EPHX3/RRAGD/CCL20/SLC16A3/SOX9/KRT17/MALL/TRIM2/CDKAL1/DSC3/YWHAZ/TUBB2B/MAPK8/SFRP1/PGRMC1/PTGS2/RAB23/FYN/CLDN1/SLC43A3/EGFR/ZFP36L2/KCNK5/ITGA6/CLIC4/KLHL7/PGBD5/PTP4A3/CA9/MSH6/PRKD3/ENO1/NFIB/MMP14/IGF2BP3/WWTR1/DNAJB4/SOX11/EDN1/COCH/PDE9A/SLC6A14/NUP62/TMSB15A/RBP1/LRP12/SOSTDC1/SERPINB2/VEGFA/QKI/PTPRF/PDPN/NFIX/LMO4/NDUFA4L2/SLC2A3/COL2A1/CDKN2A/KLF5/MCL1/COL4A2/CEP170…
ANDERSEN_CHOLANGIOCARCINOMA_CLASS2	175	-0.516563	-1.7754	3.03111e-06	3.94144e-05	2.5276e-05	4576	tags=41%, list=11%, signal=36%	MYB/PMAIP1/PLEK2/BCL11B/NOX4/DKK1/HK2/CENPE/HSH2D/ANKRD22/ARHGAP27/NRP2/AP1S3/MYOM3/EPHX3/PTPRR/SLC16A3/PPP1R1B/KRT17/SOX21/CLDN4/FA2H/LGALS3/MISP/CDC20/PTK6/BORA/KRT19/SFN/COL1A2/CTHRC1/MTMR11/CAPG/C1GALT1/CEACAM5/AURKA/CLIC3/USP54/LAMC2/PLAUR/SLC6A14/SERPINB2/SCIN/MXRA5/FAM83D/ANXA3/KLF5/PLBD1/CTSV/CEP55/UNC93B1/TTK/COL11A1/CCNB2/SAPCD2/SIX4/FGFBP1/BUB1/ANLN/CDCA3/DLGAP5/KIF15/CDH3/TPX2/UBE2C/C…
REACTOME_PEROXISOMAL_PROTEIN_IMPORT	63	0.692982	1.96307	3.09936e-06	4.00694e-05	2.56961e-05	7097	tags=62%, list=16%, signal=52%	ACOX2/BAAT/ACAA1/RPS27A/IDH1/SCP2/CRAT/EPHX2/MPV17/ACOT8/HMGCL/UBA52/PEX6/ACOT2/UBB/PHYH/ZFAND6/ECH1/HACL1/MLYCD/HSD17B4/LONP2/DHRS4/NUDT19/CROT/PEX5/PEX1/AGPS/PECR/PEX14/IDE/GSTK1/PEX10/TYSND1/PEX7/PAOX/AMACR/PIPOX/DECR2
OSWALD_HEMATOPOIETIC_STEM_CELL_IN_COLLAGEN_GEL_DN	277	-0.462513	-1.68064	3.10595e-06	4.00694e-05	2.56961e-05	5264	tags=35%, list=12%, signal=31%	LRMP/PLPP3/GPRC5C/MEF2A/IFI44/IFT74/PEX11A/IL13RA1/APP/ZSCAN18/ZNF140/TLK1/MT1E/ARMC8/KLHL24/RECK/OTUD4/ZNF322/ANKRD11/BACE2/P4HA2/STC2/RRAGD/PAK2/SLC16A3/POU2F1/ATF5/CDKAL1/DDX39B/SAFB/RLF/TMOD3/WDR33/S100PBP/KLF13/ZNF302/SNX10/ZSCAN12/SET/TPI1/RBM25/CCNE2/SOS2/NONO/ST8SIA4/MAP4K5/MXRA7/ZNF175/UBE2D1/ZBTB1/SPEN/CREB1/GUCY1A1/LGALS3BP/SRSF6/MT1F/KRIT1/MT1X/KDM5B/ZFX/GALNT3/NFIB/BPTF/CD200/H6PD/DZ…
STARK_PREFRONTAL_CORTEX_22Q11_DELETION_UP	196	-0.502203	-1.75326	3.14341e-06	4.04411e-05	2.59345e-05	6096	tags=45%, list=14%, signal=39%	CDC40/DGKD/CPEB2/ZNF804A/SPTBN1/CHKA/ARGLU1/PPP2R5E/SAMD12/ENDOD1/PIK3R1/FOXP1/ACIN1/GPRIN3/NFIC/BRD1/MYH9/SPRED1/MINK1/EMC10/AUTS2/CHD9/ROCK1/KLHL24/NR2C2/RIMBP2/PAQR8/STK4/FAR1/ANKRD11/PCDH19/SP3/LINGO1/LSM11/PPP1R1B/LINC00461/TRIM2/NUMBL/CPLX2/LRRC7/FBXO41/PRRC2B/ACVR1C/IMPAD1/DOT1L/ZNF445/CBLL1/RBM25/SRRM1/RBM39/PLXNC1/MARCKS/SPACA6/DNAJC27/SRSF11/DAB2IP/UBTF/TEF/SKI/ATN1/TCF4/LPGAT1/NECTIN1/…
REACTOME_DEGRADATION_OF_BETA_CATENIN_BY_THE_DESTRUCTION_COMPLEX	85	0.642485	1.93171	3.3355e-06	4.27949e-05	2.74439e-05	4846	tags=60%, list=11%, signal=53%	PSME2/PSMD8/FRAT1/RPS27A/PSMA7/PSME1/PSMD1/PSMB5/PSMB6/PSMD9/PSMB10/PSMD14/PSMC4/PSMA6/PSMD2/PSMD7/SKP1/PSMA3/UBA52/PSMB4/PSMD13/FRAT2/UBB/PSMB1/PSMA5/PSMD4/PSMC2/PSMA4/PSMB7/PSMA2/PPP2R5A/PSMD6/PSMB3/LEF1/PPP2R1A/PSME3/PSMC3/PSMC1/PPP2R1B/PSMB2/PSMF1/PSMD11/PSMC6/PSMC5/SEM1/CUL1/PSMD12/PSMB8/PSMD3/CTNNB1/PSMB9
REACTOME_MITOTIC_METAPHASE_AND_ANAPHASE	234	-0.481593	-1.7017	3.37285e-06	4.31559e-05	2.76754e-05	4144	tags=38%, list=10%, signal=35%	CENPM/DYNC1LI2/ESPL1/HDAC8/CENPE/CENPL/UBE2I/NUP85/MIS12/CHMP4C/B9D2/STAG2/NUP37/SKA2/CKAP5/TUBB2B/LEMD3/TUBA1C/CLASP1/ZWILCH/NUP160/ZW10/VRK1/TAOK1/SPDL1/PPP2R5B/CDC20/CENPC/CDC23/ITGB3BP/NUP58/CENPN/UBE2D1/WAPL/VRK2/TUBB1/SMC3/RAD21/CENPO/UBC/CCNB1/XPO1/PLK1/SPC25/NUP54/FBXO5/ANKLE2/KIF2C/MAD2L1/SPC24/STAG1/CENPQ/DSN1/NUF2/LBR/NUP62/CENPH/CENPK/INCENP/PDS5B/CENPI/CDCA5/NUP107/SGO2/SGO1/ERCC6L/N…
KIM_HYPOXIA	19	-0.857478	-2.0453	3.54854e-06	4.51975e-05	2.89847e-05	3452	tags=68%, list=8%, signal=63%	ANGPTL4/TPI1/GYS1/IGFBP3/PDLIM4/ALDOA/PLIN2/PFKP/VEGFA/LDHA/SLC2A1/ALDOC/ENO2
PID_FOXM1_PATHWAY	40	-0.746131	-2.08574	3.55171e-06	4.51975e-05	2.89847e-05	2994	tags=57%, list=7%, signal=54%	CREBBP/RB1/MYC/SP1/ONECUT1/BRCA2/CCNB1/EP300/PLK1/MMP2/NEK2/CDKN2A/CENPA/CKS1B/CCNB2/CENPF/CDK1/BIRC5/FOXM1/CDK2/CCNA2/SKP2/AURKB
LUI_THYROID_CANCER_PAX8_PPARG_DN	46	0.738772	1.9957	3.57488e-06	4.5369e-05	2.90946e-05	4811	tags=67%, list=11%, signal=60%	RPS5/RPS12/ATP5F1A/UQCR11/PSMD8/RAP1GAP/RPS2/RPL18A/FKBP1A/DDT/SARS1/TMEM147/EIF3K/HSPA8/RPL10A/RPL17/BLVRB/HSP90AB1/LITAF/AKR1B1/DNAJA1/SKP1/PPT1/ETHE1/RPL21/EIF3F/ATXN10/FBL/CD74/ERGIC3/CLDN7
REACTOME_FC_EPSILON_RECEPTOR_FCERI_SIGNALING	141	0.574062	1.84585	3.75181e-06	4.73577e-05	3.037e-05	4432	tags=40%, list=10%, signal=36%	PSME2/PSMD8/CALM1/RPS27A/PSMA7/PDPK1/AHCYL1/MAPK3/PSME1/PSMD1/PSMB5/PSMB6/PSMD9/PSMB10/PSMD14/PSMC4/GRB2/PSMA6/PSMD2/PSMD7/SKP1/PSMA3/UBA52/PSMB4/CDC34/PSMD13/UBB/PSMB1/PSMA5/PSMD4/PSMC2/PSMA4/PSMB7/MAP3K1/PSMA2/ITPR2/PSMD6/PSMB3/PSME3/UBE2V1/PSMC3/HRAS/PSMC1/PSMB2/PSMF1/MAPK9/PSMD11/PSMC6/TAB3/MAPK1/CHUK/PSMC5/SEM1/CUL1/PSMD12/PSMB8/PSMD3
BROWNE_HCMV_INFECTION_6HR_DN	163	-0.52839	-1.8104	3.7489e-06	4.73577e-05	3.037e-05	6098	tags=47%, list=14%, signal=40%	YLPM1/CDC40/TBC1D31/GTF2H2/ITGAE/CSTF2T/ZNF230/MEIS1/ORC2/BHLHE40/TCF7L2/ARID5B/PRR3/PIK3R1/THOC2/DUSP6/ZNF623/BRD1/NORAD/TDRD3/DKK1/MDM1/TJP2/STAU2/CDKN3/MTF2/TGIF1/FPGT/BCL9/TTF1/TRIM2/CFLAR/COIL/DMTF1/ZNF24/RND3/CASP6/RO60/BICRAL/BDKRB2/CDC23/ARNT2/ZNF175/AGGF1/TBC1D8/CREB5/SRGAP2/ITGA6/FRY/PHF3/RNF216P1/ARHGEF2/AMOTL2/ICA1/SCAF8/KANK1/DUSP10/SMAD5/LAMC2/WEE1/FGF2/FAM168A/NAP1L3/PNISR/ETV1/ALM…
VECCHI_GASTRIC_CANCER_ADVANCED_VS_EARLY_DN	142	0.575779	1.85665	3.80502e-06	4.79003e-05	3.0718e-05	4236	tags=44%, list=10%, signal=40%	NMU/ADRA2A/RPS27L/CHCHD10/AKR1C1/HSD17B2/AK1/DANCR/SULT1A2/CPS1/TMPRSS2/NAT1/CYC1/COX8A/DDT/GCNT3/EPN3/STEAP3/DHRS11/MLPH/EIF3H/SMDT1/RER1/AKR1C3/PRADC1/BLVRB/GOT1/PCBD1/STARD10/FAM3D/C9orf152/POLD4/NAT2/NDUFA7/ABCG2/CHAC2/MYEOV/VILL/ABHD13/FMO5/CHCHD5/DPP3/ALDOB/RBM19/CKMT1B/ETHE1/PLAAT2/ATP10B/CYSTM1/ABHD12/ADH1C/S100P/KIAA1324/REEP6/PIP5K1B/CDC42EP5/SYBU/PTPRN2/CAPN9/CES2/C6orf58/SSNA1
PHONG_TNF_RESPONSE_VIA_P38_COMPLETE	224	-0.479936	-1.69859	3.89201e-06	4.8864e-05	3.1336e-05	4040	tags=37%, list=9%, signal=34%	MYO1B/OTUD4/MKNK2/KDM6B/MAP7D1/AP1G2/TNFRSF11B/CDC42EP4/BCL3/NCOA2/TGIF1/KDM2A/RGS1/PPP1R12A/TRAF4/FAIM/PNRC2/SLC9A6/U2SURP/SV2A/SMURF1/GOLPH3L/S100A4/NXF1/PTGS2/SEMA4C/ENAH/JADE1/KAT6B/RPRD2/NUDT4/SPAG9/PPP1R15A/AGRN/AFF1/NKTR/EVA1B/ARID4B/INSIG1/FANCL/SOS1/ZBTB5/EXT1/ADAM17/TCF4/TRIM24/PBX1/ZFP69B/TMEM135/HHEX/MID1/CCNL1/CSGALNACT1/PAQR4/FZD2/EGR1/PTPN12/KMT2A/SLC5A3/PHIP/MNS1/RAP2C/ACSL3/NEO1/…
REACTOME_AURKA_ACTIVATION_BY_TPX2	72	-0.64474	-1.95652	3.90971e-06	4.8955e-05	3.13943e-05	4188	tags=54%, list=10%, signal=49%	CEP63/AKAP9/NEDD1/HAUS2/CKAP5/ODF2/CLASP1/CEP164/FGFR1OP/PCNT/HAUS1/HMMR/CCP110/CDK5RAP2/HAUS6/SFI1/CEP41/CEP250/HAUS3/CEP57/AURKA/HAUS8/PLK1/NEK2/PCM1/CEP192/NINL/ALMS1/TUBA1A/NDE1/CEP78/CDK1/CENPJ/PLK4/CNTRL/CEP135/TPX2/HAUS4/TUBB
COLINA_TARGETS_OF_4EBP1_AND_4EBP2	338	-0.430949	-1.58572	4.38648e-06	5.47784e-05	3.51288e-05	4133	tags=35%, list=10%, signal=32%	ESPL1/IFI35/RECK/DBF4/SLCO3A1/P2RX4/ZNF322/TNFRSF11B/NFKB1/IGFBP2/BACE1/LRRC40/PARP12/HELLS/GRK5/STC2/BHLHB9/PNRC2/SLC16A3/TBX1/PHKA2/NR2F1/TOR1AIP1/PDE1A/BCAT1/FOXP2/ATP10D/CDC20/HAUS1/HMMR/RAD51/DIAPH3/AGGF1/PFKL/AC118549.1/ADGRG2/CHRAC1/ZADH2/LGALS3BP/HLA-A/RSPO2/TCIRG1/MT1X/TINAGL1/CCNB1/ANG/CDT1/XPO1/THOC1/NFIB/SCARA3/EYA1/ATM/PLK1/EXOSC8/TSPAN6/FBXO5/POLA1/KIF2C/OSR1/ASF1B/PPFIBP2/NEK2/LXN/…
KEGG_CARDIAC_MUSCLE_CONTRACTION	76	0.660636	1.9509	4.51617e-06	5.6248e-05	3.60712e-05	2938	tags=38%, list=7%, signal=36%	UQCR11/COX5A/MT-CO2/COX5B/ATP1A1/CYC1/COX8A/UQCR10/COX6A1/UQCRQ/COX7C/UQCRFS1/COX6B1/MT-CYB/CACNB4/ATP1B3/COX6C/COX4I1/UQCRB/UQCRC2/UQCRH/CACNA1D/COX7B/COX7A2/MT-CO3/UQCRC1/CACNA2D2/TNNC1/MT-CO1
ZHANG_RESPONSE_TO_CANTHARIDIN_DN	66	0.680133	1.93977	4.61251e-06	5.72954e-05	3.67429e-05	4080	tags=58%, list=9%, signal=52%	SLC25A6/RPL4/TKT/IDH3A/RPSA/EML2/TRAP1/NOP16/HADHA/RPS14/RPL29/ATP5MC3/GTF3A/FARSA/COX4I1/RPL15/PA2G4/QDPR/FARSB/UQCRH/EEF1D/RUVBL2/MRPL3/PGAM1/TIMM17B/EIF3B/ABCC4/NDUFS3/TIMM23/POLD2/NDUFB2/CTPS1/TUBG1/SNRPC/ZNRD2/MTHFD1/NDUFB6/NOP56
REACTOME_SIGNALING_BY_NOTCH4	82	0.634456	1.89329	4.63886e-06	5.74704e-05	3.68551e-05	4432	tags=60%, list=10%, signal=54%	ACTA2/PSME2/PSMD8/RPS27A/KAT2A/PSMA7/PSME1/PSMD1/PSMB5/PSMB6/PSMD9/PSMB10/PSMD14/PSMC4/PSMA6/PSMD2/PSMD7/SKP1/PSMA3/UBA52/PSMB4/PSMD13/UBB/PSMB1/PSMA5/PSMD4/PSMC2/PSMA4/PSMB7/PSMA2/PSMD6/PSMB3/PSME3/PSMC3/PSMC1/PSMB2/PSMF1/PSMD11/PSEN2/PSMC6/PSMC5/RBPJ/SEM1/CUL1/PSENEN/PSMD12/HEY2/PSMB8/PSMD3
REACTOME_UNWINDING_OF_DNA	12	-0.920554	-1.9392	4.6541e-06	5.7507e-05	3.68786e-05	1813	tags=100%, list=4%, signal=96%	MCM7/GINS3/GINS1/MCM2/MCM3/MCM4/MCM8/GINS4/MCM6/CDC45/MCM5
DACOSTA_UV_RESPONSE_VIA_ERCC3_UP	315	0.471781	1.63616	4.79355e-06	5.90741e-05	3.78836e-05	4936	tags=40%, list=11%, signal=36%	TNFRSF10D/FDXR/TSPYL2/IFI30/SMPD1/TUBA4A/SNHG29/SULT1A2/NDUFV1/CREG1/TRIAP1/CCND3/MPDU1/CYP1B1/PSMD8/NAT1/ALDH1B1/FKBP1A/DDT/GSTP1/SLC25A4/RSL1D1/RPL23/ZNHIT1/ATP6V1F/TST/MRPS12/NDUFS7/EIF3I/CYB5R1/EPHX1/ACAA1/TM7SF2/AAMP/GRHPR/SCO2/SIGMAR1/BUD23/PPIF/RPS15A/AP2S1/SLC1A5/RABAC1/SQSTM1/IGFBP6/RHOB/RPS6KB2/CLTB/TNFSF9/TUBB2A/UROD/PSMB10/EEF1D/NDUFB7/ABCB6/BAG1/EIF2S3/SDF2/BRMS1/CCDC85B/BAK1/OGFR/GR…
REACTOME_TRANSFERRIN_ENDOCYTOSIS_AND_RECYCLING	30	0.796752	1.97449	4.85652e-06	5.96931e-05	3.82806e-05	3111	tags=63%, list=7%, signal=59%	ATP6V1A/ATP6V0D1/ATP6V1E1/ATP6V0B/ATP6V0A4/ATP6V1H/ATP6V1F/STEAP3/ATP6V1D/ATP6V0E1/ATP6V1B2/ATP6V0C/ATP6AP1/MCOLN1/ATP6V1C1/ATP6V0A1/ATP6V1G1/ATP6V1G2/ATP6V0E2
JIANG_AGING_HYPOTHALAMUS_UP	49	0.722673	1.97794	5.0752e-06	6.22177e-05	3.98996e-05	3302	tags=53%, list=8%, signal=49%	SNX2/RPS12/PRDX1/C1QBP/GAS5/NDUFB5/SOD1/HSPE1/PPA1/ATP5IF1/BTG3/CCT6A/PPP1R7/ATP5MG/PSMD14/ATP5MD/PSMA6/ATP5PO/PREP/COX7A2/PSMA4/ATP5F1C/HSD17B4/M6PR/NDUFA1/TBCA
REACTOME_INTERLEUKIN_1_SIGNALING	101	0.615938	1.89517	5.25299e-06	6.42291e-05	4.11894e-05	4432	tags=54%, list=10%, signal=49%	SAA1/PSME2/NFKBIB/PSMD8/RPS27A/PSMA7/PSME1/PSMD1/PSMB5/SQSTM1/PSMB6/PSMD9/TOLLIP/PSMB10/PSMD14/PSMC4/NKIRAS1/PSMA6/PSMD2/PSMD7/SKP1/PSMA3/UBA52/PSMB4/PSMD13/UBB/PSMB1/PSMA5/PSMD4/PSMC2/PSMA4/PSMB7/IRAK3/PSMA2/PSMD6/PSMB3/IRAK2/IRAK1/PSME3/NKIRAS2/UBE2V1/PSMC3/PSMC1/PSMB2/PSMF1/PSMD11/PSMC6/TAB3/CHUK/PSMC5/SEM1/CUL1/PSMD12/PSMB8/PSMD3
GENTILE_UV_RESPONSE_CLUSTER_D4	54	-0.688117	-2.01317	5.39246e-06	6.57628e-05	4.2173e-05	3610	tags=61%, list=8%, signal=56%	RBM5/BHLHE40/ARID5B/UFL1/PHC2/POGZ/DDX3X/SMURF2/THUMPD1/SNRNP40/PUM1/RAPGEF2/BMPR1A/SPEN/SIAH1/DICER1/KRIT1/RAD21/CCNB1/KPNA2/AURKA/KANK1/CLINT1/XPO1/GNE/CHSY1/FILIP1L/ARF6/TPST1/USP1/DDX17/FZD7/HMGB2
REACTOME_SCF_SKP2_MEDIATED_DEGRADATION_OF_P27_P21	60	0.693937	1.95488	5.42376e-06	6.59727e-05	4.23076e-05	4432	tags=77%, list=10%, signal=69%	CDKN1A/PSME2/PSMD8/RPS27A/PSMA7/PSME1/PSMD1/PSMB5/PSMB6/PSMD9/PSMB10/PSMD14/PSMC4/PSMA6/PSMD2/PSMD7/SKP1/PSMA3/UBA52/PSMB4/PSMD13/UBB/PSMB1/PSMA5/PSMD4/PSMC2/PSMA4/PSMB7/CCND1/PSMA2/PSMD6/PSMB3/PSME3/PSMC3/PSMC1/CCNE1/PSMB2/PSMF1/PSMD11/PSMC6/PSMC5/SEM1/CUL1/PSMD12/PSMB8/PSMD3
TIEN_INTESTINE_PROBIOTICS_6HR_UP	53	0.714876	1.96844	5.44412e-06	6.60488e-05	4.23564e-05	2090	tags=55%, list=5%, signal=52%	FTL/RPS19/RPL4/EIF5A/EEF1A1/EEF1G/RPS2/RPS6/RPL23A/MMP24OS/RPS23/RPL37A/RPS24/RPL23/RPLP0/RPL13/RPL27A/HSPA8/TPT1/RPS14/RPS3A/RPS27/RPS17/RPL5/RPS7/RPS11/RPL41/FAM120A/RPL39
REACTOME_CELLULAR_RESPONSE_TO_HYPOXIA	75	0.655033	1.93098	5.49803e-06	6.65304e-05	4.26652e-05	4846	tags=67%, list=11%, signal=59%	HIGD1A/PSME2/CITED2/PSMD8/ELOB/RPS27A/PSMA7/PSME1/PSMD1/PSMB5/PSMB6/PSMD9/EPAS1/PSMB10/PSMD14/PSMC4/PSMA6/PSMD2/PSMD7/ELOC/PSMA3/UBA52/PSMB4/PSMD13/UBB/PSMB1/PSMA5/PSMD4/PSMC2/PSMA4/PSMB7/PSMA2/PSMD6/PSMB3/PSME3/PSMC3/PSMC1/HIF1A/PSMB2/PSMF1/PSMD11/CUL2/PSMC6/PSMC5/SEM1/PSMD12/PSMB8/PSMD3/EGLN2/PSMB9
FLORIO_NEOCORTEX_BASAL_RADIAL_GLIA_UP	373	-0.417931	-1.55615	5.67945e-06	6.85487e-05	4.39595e-05	5483	tags=27%, list=13%, signal=24%	OPHN1/FAM241A/ETS1/LRMP/CRX/TIMD4/CTCFL/TECRL/ASB15/TRIM66/FLT1/CFAP54/HFE/GADL1/ABCC9/MFSD4B/NIPAL1/AICDA/RNF125/SELE/SHROOM4/POU5F1B/MBNL1/SYNPO2/PDE3A/PTPN14/IRF1/SCN11A/CGNL1/GBP6/BVES/FRK/DSC3/ERAP2/SP140L/IFNLR1/AGMO/C21orf58/RGS5/GATAD1/ZFP42/ACVR1C/EOGT/FOXP2/RSAD2/TTC6/IRF6/ZNF221/REL/MACC1/ARHGAP28/STC1/L1TD1/HSPA2/DMC1/KCNJ15/ISG20/ZBTB8B/BLOC1S6/FBLIM1/CCNF/KCNG3/ARHGAP24/CNKSR3/WWTR1…
CORRE_MULTIPLE_MYELOMA_DN	57	-0.676902	-1.9913	5.73024e-06	6.89839e-05	4.42386e-05	3678	tags=46%, list=8%, signal=42%	IMPA2/RPL39L/PLCL1/ZFP36L2/FZD1/ZADH2/INSIG1/MAMDC2/CNKSR3/EZR/NEK2/LPAR1/ALDH7A1/CADPS2/PRRT2/TRIM59/CDCA5/CCN4/LIN7A/COL11A1/BARD1/NPR3/OLFML3/TNFRSF19/SETBP1/FBLN1
MIYAGAWA_TARGETS_OF_EWSR1_ETS_FUSIONS_DN	231	-0.478872	-1.69022	5.9724e-06	7.17147e-05	4.59899e-05	3727	tags=37%, list=9%, signal=34%	DMXL2/MAP2/LTBP1/MOSPD1/PLPP3/GLT8D2/FOXD1/ARHGEF5/FAM171B/HAS2/CCL2/PLXNA1/SPRED1/DKK1/RECK/TNFRSF11B/PABPC1L/EIF5A2/STC2/DOK5/LSM11/LOXL2/RBMS3/SOAT1/CLCF1/GALNT5/PPP2R3A/AK5/EHBP1/SOWAHC/DCBLD2/HIP1/MINDY2/COL5A1/EGFR/IGFBP3/TLE1/OSBPL1A/IL6/OSMR/STC1/PDLIM4/RPS6KA6/PEX2/COL1A2/MARCKS/DENND1B/ITGB8/SLC4A7/MAFF/CA9/TANC2/ZNF365/MMP14/ABHD2/GATA6/GPR180/PRICKLE2/PKIA/FILIP1L/NID2/ZNF281/PCDH18/R…
SCIAN_CELL_CYCLE_TARGETS_OF_TP53_AND_TP73_DN	22	-0.837359	-2.05198	6.04389e-06	7.23875e-05	4.64213e-05	3541	tags=73%, list=8%, signal=67%	CDKN3/MYC/CDC20/MCM7/CCNB1/AURKA/CCNF/MCM6/KIF22/CDC25C/CDK2/TPX2/CCNA2/UBE2C/MAPRE2/GTSE1
REACTOME_PHASE_I_FUNCTIONALIZATION_OF_COMPOUNDS	101	0.613861	1.88878	6.07526e-06	7.25776e-05	4.65433e-05	4113	tags=31%, list=9%, signal=28%	CYP4B1/CYP2A6/MAOA/FDXR/AHRR/CYP1A1/ALDH2/CYP1B1/ALDH1B1/ACSS1/CYP39A1/FDX2/EPHX1/CYP2A7/HSP90AB1/ALDH1A1/CYP2J2/CYP24A1/POR/CYP2B6/AHRR/ADH1C/FMO3/NQO2/CYP1A2/FDX1/CMBL/ACSS2/CES1/CYP2R1/MAOB/CES2
REACTOME_DISEASES_OF_METABOLISM	243	0.493771	1.67193	6.16673e-06	7.32964e-05	4.70042e-05	5330	tags=39%, list=12%, signal=34%	PAPSS2/MAOA/FDXR/TALDO1/DCXR/TCN2/MCCC1/CFP/AHCY/MPDU1/CYP1B1/THSD4/PCCB/THSD7A/SFTPB/G6PC3/PC/FDX2/ACY1/CTSA/HSPG2/MCCC2/RPS27A/SLC34A2/GCLC/DOLK/ALG1/IDH1/SFTA3/ALG3/MMUT/PAH/GALE/TPMT/GPC5/GAA/NAGLU/ALG8/GALT/IDUA/PCCA/HYAL1/GYG1/FMOD/CYP24A1/GSS/SFTPC/UBA52/GNS/C1GALT1C1/UBB/BGN/HEXA/GALNS/SDC4/IDS/ALDOB/MUC20/DPM2/GGT1/UGT1A1/DCN/MUC13/SFTPA2/NEU1/FMO3/ADAMTS10/B3GAT3/FDX1/DHDDS/POMGNT1/SDC1…
HOOI_ST7_TARGETS_DN	118	-0.563268	-1.83286	6.16573e-06	7.32964e-05	4.70042e-05	3911	tags=42%, list=9%, signal=39%	KMT5B/ZBTB47/MCAM/C4orf47/IREB2/VWA5A/ANGPTL4/MLLT3/C2CD4A/MMP10/CNTNAP3/BAMBI/ANKRD36B/ANK3/MBTD1/PPL/PDLIM4/DENND1B/ITGB8/COL1A1/ANG/RBPMS/TPM4/WHAMMP3/PGAP1/CSGALNACT1/CADPS2/TBC1D8B/PPP1R3B/ARID2/TRIB2/TMEM30B/RNASE4/ACSL3/NFKBIZ/FOXA1/SPARC/CCDC150/OBSL1/TMEM45A/ENO2/MCOLN3/TET1/PFKFB4/PDK1/PPFIA4/NDRG1/TM4SF1/ZNF395/KDR
KIM_MYC_AMPLIFICATION_TARGETS_DN	95	-0.599419	-1.90058	6.26105e-06	7.42291e-05	4.76023e-05	5496	tags=47%, list=13%, signal=41%	LAMP1/GRHL2/SHROOM3/NUCB2/CCDC146/KIAA2026/TMEM67/XRRA1/BCL2/RMST/CCDC171/ZNF83/CFLAR/GRP/RIMKLB/RAB3B/LPP/ETV6/TMBIM4/PAXIP1/IFIH1/ZMAT4/RNF38/FNBP1L/ATP2B4/GCA/KCNMB2/IL17RD/ZNF292/FAM111A/ATL3/CDH1/GAS2L3/ZNF43/CCDC191/CNTLN/KLF5/TCF19/PLEKHA2/CEBPD/SORBS2/DCLK1/PIF1/ZNF880/DPYSL3
SENESE_HDAC1_TARGETS_DN	261	-0.454985	-1.63447	6.36597e-06	7.52824e-05	4.82778e-05	4304	tags=36%, list=10%, signal=33%	NOX4/CD46/CNN1/MYRF/KIAA1522/FAM171A1/MDP1/AP1G2/IMPA2/SDC3/CNPY4/CIRBP/MATN3/BTBD2/BCAR1/TIAM2/GSTM1/TRIM2/FAM114A1/TUBB2B/IQCA1/FKBP7/PLEKHH1/ENAH/SET/NFIA/LYPD1/FOXO6/COL5A1/TNFRSF13C/ELFN2/LSP1P4/ABCC3/S100A10/MYH10/COL1A1/EFCAB2/TRO/DKK3/MYBL1/NRBP1/RBPMS/TPM4/TCF4/ARHGEF40/PBX1/CYTH2/TMEM135/CAVIN1/SLX4IP/TRIM6/THRB/PCDHB10/ZNF260/PHLDB2/NXPH2/CCSAP/BAZ2B/MIR1915HG/LRRN1/CBX5/NAP1L3/NARF/MA…
GRUETZMANN_PANCREATIC_CANCER_DN	194	0.519728	1.71992	6.7469e-06	7.95863e-05	5.10378e-05	3993	tags=35%, list=9%, signal=32%	SERPINA5/MAOA/SMPD1/APLP1/SLC25A5/DANCR/DSTN/RPL7A/ACSM3/EEF2/RPS10/DDT/RPS24/IMPDH2/CYB5A/RPL13/CRYAB/H19/ACADM/RPS9/LGALS8/PABPC4/PEPD/RPL32/BCAT2/SNHG14/AMD1/ANXA4/AP1B1/RPS7/TRPV6/PPIF/PRKAR2B/RPL17/TOMM20/ACO1/PCBD1/GAMT/PEBP1/CRAT/ALDH1A1/IGBP1/EPHX2/CCND2/PEX6/SLC25A3/DAP/SSR4/HSD17B4/SRP54/PRDX4/UBXN8/PHOX2B/ISG15/EIF3A/PPP2R1B/MAPK9/PEX1/PSEN2/ITPRID2/PTPRN2/GATD3A/SEC62/F12/GYPC/SMPDL3A…
SMIRNOV_RESPONSE_TO_IR_6HR_UP	167	0.544145	1.78188	7.11491e-06	8.35848e-05	5.3602e-05	5435	tags=46%, list=12%, signal=41%	AEN/CDKN1A/CDIP1/ZMAT3/ACTA2/FDXR/GDF15/SLC7A6/INKA2/FAS/FUCA1/CCNG1/TRIAP1/EI24/NINJ1/ABCA12/RETSAT/TM7SF3/LAMP3/PHLDA3/SESN1/BBC3/COQ8A/DDB2/F2R/MDM2/GAMT/TNFSF9/INPP1/TNFRSF10B/DUSP14/MAP4K4/MLF2/DDIT3/RABGGTA/ID3/C11orf24/POLH/CD70/NHLH2/FHL2/CLP1/WRAP73/RAD51C/PSTPIP2/GLS2/MAD1L1/MR1/MICALL1/HRAS/CEACAM1/PPM1D/XPC/DSE/CROT/CHMP3/MRPL49/ANKRA2/SEC61A1/TP53TG1/SDC1/PIDD1/CES2/RAB1A/PLXNB2/TIGA…
CHIARADONNA_NEOPLASTIC_TRANSFORMATION_KRAS_UP	131	-0.544592	-1.80502	7.12157e-06	8.35848e-05	5.3602e-05	3041	tags=37%, list=7%, signal=35%	CENPV/E2F8/HMGN2/SET/SPRED2/RAD51/ST6GAL1/ITGA6/HAUS3/DNMT1/TCF12/HNRNPD/AURKA/RRM1/RFC5/ANGPTL2/UHRF1/EVL/POLA1/TPBG/FIGNL1/RRM2/CDC7/RBL1/MYEF2/TOPBP1/SLC6A8/NAV2/SLC12A2/PCLAF/PDPN/NCAPH/CENPA/TMSB4X/CTSV/CKS1B/H2AX/IVNS1ABP/ZWINT/SMC2/NFKBIA/PCDH7/GREM2/MARCKSL1/PLK4/ANP32E/GJA1/TOP2A/APCDD1
REACTOME_COPII_MEDIATED_VESICLE_TRANSPORT	68	0.672586	1.9485	7.22015e-06	8.45299e-05	5.42081e-05	4962	tags=47%, list=11%, signal=42%	NAPA/F5/TRAPPC1/TGFA/FOLR1/TRAPPC2L/RAB1B/CD59/CNIH1/TRAPPC5/NSF/PPP6R1/MCFD2/TRAPPC6A/YKT6/LMAN2L/PREB/TRAPPC3/GOSR2/TRAPPC4/USO1/AREG/SCFD1/LMAN2/PPP6C/RAB1A/TRAPPC10/GORASP1/NAPG/SAR1B/TRAPPC9/STX5
WAKABAYASHI_ADIPOGENESIS_PPARG_RXRA_BOUND_WITH_H4K20ME1_MARK	146	0.563232	1.82361	7.33949e-06	8.57128e-05	5.49667e-05	5304	tags=51%, list=12%, signal=45%	GHITM/ALDH6A1/PLAAT3/SLC48A1/ETFB/KLF15/PC/MTCH2/ACADM/GCSH/ATP5PF/BCAT2/ATP5MC3/ATP1B3/BCAR3/IDH1/CD302/APMAP/CS/EVI5L/COQ8A/QDPR/SLC1A5/SLC25A46/ESRRA/SORT1/IMMT/ATG101/JAGN1/NDUFS6/PNPLA2/CHP1/HSDL2/PCCA/LTBP3/MLF2/ALAD/PAM16/SCARB2/CHCHD3/PEX3/HSD17B12/AFTPH/NR1D1/TMEM33/ABCC4/YPEL5/NATD1/HIBADH/HADH/ERP29/LONP2/HIBCH/MPC2/PARL/SELENOI/AP3S1/FDX1/STOM/MOCS2/BCL2L13/PRNP/PEX5/IFNGR1/TXLNG/REEP…
REACTOME_SUMOYLATION_OF_DNA_REPLICATION_PROTEINS	46	-0.710935	-2.02619	7.48569e-06	8.72027e-05	5.59222e-05	4762	tags=48%, list=11%, signal=43%	POM121C/PIAS3/UBE2I/NUP85/NUP37/SUMO2/NUP160/NUP58/AURKA/NUP54/NUP153/NUP62/TPR/INCENP/NUP107/CDCA8/BIRC5/SUMO3/NUP210/NDC1/TOP2A/AURKB
PLASARI_TGFB1_SIGNALING_VIA_NFIC_1HR_DN	108	-0.570869	-1.83931	8.11985e-06	9.43555e-05	6.05092e-05	5853	tags=51%, list=13%, signal=44%	ZCCHC24/SPTBN1/ARGLU1/PERP/ENDOD1/PIK3R1/IFI44/THOC2/MARF1/LUZP1/GPC6/CREBBP/AKAP9/TMTC4/NET1/CENPE/RGS17/ANKRD11/INO80D/KDM5A/PTH1R/IGF2/LOXL2/AGO2/TUBB2B/RGS5/NFIA/RGS4/HNRNPL/NNAT/CBL/TINAGL1/PCSK5/MYBL1/RBFOX2/NFIB/TPM1/CADM4/TPR/SLC12A2/CTSF/COL3A1/FOXA1/COL2A1/SEMA3B/SOX2/ATRX/FAT4/FGFR2/PTK7/CDO1/NPR3/TSPAN5/GPC3/CDKN1C
REACTOME_METABOLISM_OF_WATER_SOLUBLE_VITAMINS_AND_COFACTORS	123	0.576635	1.8227	8.353e-06	9.68246e-05	6.20926e-05	5915	tags=45%, list=14%, signal=39%	TCN1/NMNAT2/TCN2/NT5E/MCCC1/ACP5/NFS1/PCCB/PC/CYB5A/NAXE/MCCC2/SLC52A2/NADK/MMUT/SLC25A16/NNMT/QPRT/PCCA/PARP9/NADSYN1/FASN/MOCS1/ABCC1/GSTO1/NAXD/GPHN/PPCS/MOCS3/FLAD1/RFK/MTHFD1L/MTHFS/FPGS/MOCS2/MTHFR/NAMPT/SLC19A2/SLC19A1/MTHFD1/SHMT1/CD320/PDZD11/SLC46A1/AASDHPPT/SLC23A2/SLC25A19/LMBRD1/MMADHC/MMAA/COASY/ENPP2/SLC5A6/RNLS/SHMT2
REACTOME_CELL_CELL_COMMUNICATION	128	-0.543695	-1.80531	8.56441e-06	9.90299e-05	6.35068e-05	5248	tags=36%, list=12%, signal=32%	LIMS1/CDH12/PIK3R1/CLDN12/MPP5/ACTG1/ITGB4/PARVA/SPTAN1/CLDN10/ACTB/ILK/CTNND1/CLDN4/FYN/CLDN1/PRKCI/AFDN/ITGA6/FBLIM1/ANG/CLDN18/NECTIN1/FERMT2/SDK1/LAMC2/SFTPD/CDH1/SRC/PIK3CB/CDH24/PXN/NECTIN3/CLDN5/LAMA3/CD47/CDH3/FLNA/CDH7/CDH4/CDH10/CLDN3/CADM1/KIRREL1/FLNC/CDH2
BOUDOUKHA_BOUND_BY_IGF2BP2	107	0.598382	1.85054	9.6623e-06	0.00011145	7.14715e-05	4750	tags=51%, list=11%, signal=46%	ZMAT3/AK1/KLF9/CCNG1/DESI1/CCND3/CD81/RPS10/MAP1LC3B/COX8A/RPS16/TMEM147/RPLP0/CRYAB/COX7C/VAMP8/RPS27A/RPL36A/PHLDA3/ATP6V0C/CISD1/HIGD2A/MARCHF2/RPL36/ATP5F1E/ROMO1/FAU/VPS26A/RPS15/ATP5MF/ABCB6/SDF2/RPS4X/FTH1/VTI1B/EMC6/CCND1/CUX1/CHCHD4/DNAJC30/FAM126A/LSM10/RPL22/NDUFA1/ISCA2/HSPA1B/TIMM8A/ABHD4/DYNLL1/RRP8/C6orf226/NAPG/GNG12/VBP1/LIMS2
BHAT_ESR1_TARGETS_VIA_AKT1_UP	281	0.475954	1.63494	9.85695e-06	0.000113415	7.27321e-05	5204	tags=36%, list=12%, signal=32%	GREB1/GDF15/OSGIN1/SLC7A6/RCL1/ZNF703/CYP1B1/MYBBP1A/MFSD2A/WDR46/WWC1/CALM1/TOMM40/SRM/MLPH/ALPL/NOP14/TIPARP/NT5DC3/KRT13/SCNN1A/AP1B1/MCRIP2/HPCAL1/PA2G4/PPIF/RPP40/SCNN1B/CARD19/SHB/TPD52L1/PIP4K2A/NOL6/TBKBP1/RRP12/AATF/LETM1/IFRD1/PRKAG2/LTBP3/EIF2S1/PAM16/NADSYN1/GPATCH4/ADAP1/UBALD1/TSKU/IMP4/CDC34/SLC22A5/EIF3B/PCYT2/CLUH/MYEOV/ADCY9/FHL2/UBQLN4/CCND1/FAM207A/OVOL2/TRMT61A/NEIL2/TWNK/NUD…
SENESE_HDAC1_AND_HDAC2_TARGETS_DN	236	-0.468325	-1.65734	9.91275e-06	0.000113778	7.29646e-05	3139	tags=30%, list=7%, signal=28%	BEX1/TAGLN/IMPA2/TNNT2/LOXL1-AS1/THUMPD1/RBMS3/HDAC2/KRT17/S100A4/DTNA/CAP2/ATP8B1/PLEKHH1/SET/LSP1P4/LOXL1/ABCC3/ZNF362/RHOBTB1/INSIG1/ZNF219/COL1A1/MTUS1/MYBL1/NFIB/TCF4/SCARA3/CNKSR3/OCLN/CDKN2C/TMEM135/KATNAL1/PKP2/DEPDC1/TPM1/PRICKLE2/NPPB/PDLIM1/COL5A2/GPX8/CCSAP/MIR1915HG/TRIB2/SYNPO/MAGI2-AS3/PLCE1/ATL1/PKIB/COL16A1/COL3A1/TMEM255A/SDC2/MAP3K20/TUBA1A/SEMA3B/NRXN3/CAV1/IGFBP7/OLFML3/TMEM4…
WANG_SMARCE1_TARGETS_UP	288	-0.433705	-1.58183	9.98498e-06	0.000114327	7.33165e-05	3593	tags=31%, list=8%, signal=28%	KLHL24/PARVA/LIMA1/DPYD/TAGLN/BACE2/ERI1/NID1/CGNL1/STON2/WT1/CTDSP2/ATP11C/BCAT1/INHBB/FKBP7/JDP2/DENND2B/PROS1/NEGR1/ATP8B1/ATP10D/PLD3/HIPK3/LPP/ETV6/ATXN1/GNG2/COL5A1/CFI/FZD1/SOCS2/FRY/MARCKS/ITGB8/CTHRC1/DLL1/KLHL28/RBMS1/COL1A1/FBLIM1/ANG/LPCAT2/ABCA1/SMTN/CD200/MMP2/PCDHB2/MAN2A1/TPBG/PGM2L1/DSG2/PCDHB10/ATL3/PTGFRN/DACH1/PPP1R3B/NAP1L3/NID2/TRIB2/RNASE4/TES/PCDHB14/BMPR2/RAB27A/CCN4/CFH/…
TURASHVILI_BREAST_DUCTAL_CARCINOMA_VS_LOBULAR_NORMAL_UP	73	-0.630975	-1.92354	1.02164e-05	0.000116691	7.48328e-05	2318	tags=38%, list=5%, signal=36%	CCNE2/HMMR/UBE2D1/TMEM107/COL1A2/DENND1B/CTHRC1/INTS7/MCM9/COL1A1/DDX60/DTL/FANCI/COL5A2/PRR11/TRIM59/INHBA/RACGAP1/COL3A1/COL11A1/RALGPS2/HDGFL3/MELK/ANLN/NUSAP1/TOP2A/VCAN/ASPM
ZHOU_INFLAMMATORY_RESPONSE_FIMA_UP	498	-0.388851	-1.4757	1.03166e-05	0.000117549	7.53832e-05	3949	tags=28%, list=9%, signal=25%	CD83/PTPN21/TNF/KDM6B/C4orf33/TMLHE/NFKB1/UBE2FP1/SLC38A3/RIPK2/MOB3C/CA14/ANGPTL4/NBN/BRICD5/SEMA6C/IL1B/TMEM217/ODF3B/DNAJB5/DYRK3/ERC1/MYRFL/ZNF286A/CDON/CCL20/SGMS2/MEIOB/SOX21/CLCF1/TTC23/CRISP3/IL1A/ZC3H12A/SRGAP1/ARL4D/CTNNA2/WDR66/BAMBI/DENND5A/PTGS2/KLF12/LINC00514/FOXP2/RIF1/DOT1L/HIPK3/TRAF1/PXDN/FGF9/CLDN1/ZC3H12C/COL5A1/EGFR/IGFBP3/EPC1/REL/RAPGEF2/NPAS2/IL6/PPP1R15A/NFKB2/RAPGEF5/CR…
REACTOME_THE_ROLE_OF_GTSE1_IN_G2_M_PROGRESSION_AFTER_G2_CHECKPOINT	79	0.637194	1.89385	1.0379e-05	0.000117973	7.5655e-05	4449	tags=62%, list=10%, signal=56%	CDKN1A/PSME2/TUBA4A/PSMD8/RPS27A/PSMA7/PSME1/PSMD1/PSMB5/HSP90AB1/PSMB6/PSMD9/TUBB2A/PSMB10/PSMD14/PSMC4/PSMA6/PSMD2/PSMD7/PSMA3/UBA52/PSMB4/PSMD13/UBB/PSMB1/PSMA5/PSMD4/PSMC2/PSMA4/PSMB7/PSMA2/PSMD6/PSMB3/TUBB8/PSME3/PSMC3/PSMC1/HSP90AA1/PSMB2/PSMF1/PSMD11/PSMC6/PSMC5/SEM1/TUBA3E/PSMD12/PSMB8/PSMD3/TUBB4A
REACTOME_RHO_GTPASE_EFFECTORS	320	-0.431334	-1.58238	1.04669e-05	0.000118684	7.61105e-05	4431	tags=34%, list=10%, signal=31%	MYH9/KIF5B/ACTG1/ROCK1/KDM1A/CENPM/DYNC1LI2/SCAI/CENPE/YWHAH/H2AC14/CENPL/NCOA2/NUP85/ACTB/MIS12/NCF2/PPP1R12A/RTKN/PAK2/B9D2/DVL3/NUP37/SKA2/YWHAZ/CKAP5/TUBB2B/TUBA1C/PKN2/H2AZ1/CLASP1/ABL1/FMNL1/ZWILCH/NUP160/ZW10/TAOK1/PPP1CB/SPDL1/DAAM1/PPP2R5B/CDC20/CENPC/ITGB3BP/DIAPH3/MRTFA/WIPF2/SFN/CENPN/SRGAP2/GOPC/MYH10/TUBB1/CENPO/XPO1/PLK1/SPC25/EVL/KIF2C/MAPK14/MAD2L1/SPC24/CENPQ/DSN1/WASF2/NUF2/PPP…
RIZ_ERYTHROID_DIFFERENTIATION	82	-0.603459	-1.87635	1.07574e-05	0.000121683	7.80342e-05	5289	tags=51%, list=12%, signal=45%	RXRA/POLE2/DHX9/PLA2G6/ANKRD49/PIAS3/ZBTB17/SP3/PBX2/POU2F1/CTCF/FEN1/ETAA1/EXO1/HNRNPDL/HMGN2/POLD1/ELF4/CENPC/NFYB/MCM7/DNMT1/BRCA1/UHRF1/POLA1/SMARCE1/MID1/MCM2/BLM/RBL1/MCM3/MCM4/EZH2/MYBL2/NFIX/CENPA/MCM5/KIF4A/HMGB2/TOP2A/AURKB/HMGB1
REACTOME_TRANS_GOLGI_NETWORK_VESICLE_BUDDING	72	0.655418	1.91788	1.10029e-05	0.00012416	7.96227e-05	3440	tags=46%, list=8%, signal=42%	FTL/SNX2/NAPA/SNX5/AP1S1/ARRB1/VAMP8/HSPA8/CLTA/VAMP2/AP1B1/NECAP1/VAMP7/AP1M2/RAB5C/TPD52L1/SORT1/CLTB/DNAJC6/STX4/CHMP2A/FTH1/GNS/IGF2R/HIP1R/GAK/CLTC/TXNDC5/AP3S1/BLOC1S1/M6PR/ARF1/BLOC1S3
ZHOU_INFLAMMATORY_RESPONSE_LIVE_UP	439	-0.401366	-1.51176	1.10921e-05	0.000124866	8.00754e-05	3963	tags=26%, list=9%, signal=24%	SLCO3A1/CD83/TNF/KDM6B/MBNL1/NFKB1/UBE2FP1/ZNF334/RIPK2/CEP350/NBN/LMO3/BRICD5/SEMA6C/IL1B/STON2/ODF3B/DNAJB5/CALY/DYRK3/CDON/CCL20/WDR87/ICA1L/AGO2/SGMS2/CLCF1/IL1A/CFLAR/ZC3H12A/SRGAP1/ARL4D/FNDC3B/BAMBI/RND3/DENND5A/PTGS2/FOXP2/DOT1L/TRAF1/PXDN/ATXN1/ZC3H12C/REL/KRT19/RAPGEF2/IL6/PPP1R15A/NFKB2/HEY1/CREB5/MIER1/FRY/MARCKS/ITGB8/KLHL28/TNIP1/REM2/MAFF/TBC1D9/TRIM36/ADAM17/NCOR2/TPD52/KANK1/ABCA…
PID_AURORA_B_PATHWAY	39	-0.730129	-2.04071	1.1408e-05	0.000128115	8.21586e-05	1495	tags=51%, list=3%, signal=50%	AURKA/KIF2C/NCAPG/CBX5/RACGAP1/INCENP/STMN1/NCAPH/SGO1/SMC4/NDC80/KIF20A/CENPA/NCAPD2/SMC2/CDCA8/BIRC5/BUB1/VIM/AURKB
CREIGHTON_ENDOCRINE_THERAPY_RESISTANCE_2	456	-0.393649	-1.4862	1.16461e-05	0.000130476	8.36726e-05	6714	tags=34%, list=15%, signal=29%	RMI1/KIAA1549/IQCH/APOLD1/ZNF20/STPG1/IQUB/WDR78/RASSF1/RNF32/ZNF200/NOD2/EPOR/SERPINI2/TBC1D31/CLUAP1/RFX3/CFAP45/ZNF432/SAMD15/ELOA-AS1/NEK4/TTC26/PPP6R3/EFHC2/CLHC1/SPATA17/RABL2B/CCDC173/MAP3K19/TMEM106C/CACUL1/SLC25A14/IFT74/TXLNA/PHTF1/TMCC1/ARMC3/LRRC10B/LZTFL1/PPIL6/TMEM121/C8orf48/DDX25/UHRF1BP1/SPOP/MAK/H3-3A/ZBBX/FBXL13/CCDC138/RFX2/AKNA/TMEM67/COG7/CCDC121/GPM6B/AGBL2/STOX1/RASAL2/ZFA…
REACTOME_TRANSPORT_TO_THE_GOLGI_AND_SUBSEQUENT_MODIFICATION	184	0.528765	1.74984	1.17232e-05	0.000131025	8.40252e-05	5144	tags=38%, list=12%, signal=34%	NAPA/TUBA4A/CD55/FUCA1/MGAT5/F5/SPTBN2/TRAPPC1/TGFA/FOLR1/TRAPPC2L/RAB1B/CD59/CNIH1/TMED3/SPTB/DCTN3/SPTBN5/TUBB2A/COPE/COG2/TRAPPC5/NSF/PPP6R1/B4GALT3/MCFD2/MGAT1/TRAPPC6A/ACTR1A/TMEM115/YKT6/LMAN2L/PREB/CAPZB/ARF4/ARF3/TRAPPC3/TUBB8/GOSR2/TRAPPC4/COG1/ARF1/ACTR10/USO1/AREG/SCFD1/MGAT4A/LMAN2/COPG1/PPP6C/DYNLL1/KDELR1/DCTN4/TUBA3E/RAB1A/TRAPPC10/ST3GAL4/GBF1/GORASP1/B4GALT2/TUBB4A/DCTN2/NAPG/CAP…
BLALOCK_ALZHEIMERS_DISEASE_INCIPIENT_UP	387	-0.413684	-1.54489	1.17665e-05	0.000131196	8.41347e-05	5071	tags=36%, list=12%, signal=32%	HERC5/THOC2/IFT74/NDST1/IPP/IL13RA1/APP/CDC5L/NFIC/SNRK/BRD1/GNAZ/SMC1A/CPQ/MARCHF6/ZNF253/JUND/RGS9/CUL4A/DBF4/AKAP9/FZR1/JAK3/GTF2I/TNFRSF11B/CDC42EP4/OGG1/MDM1/GTF2H3/KAT2B/CEP350/ERF/ITGA1/PRPF4B/SP3/PTH1R/FGL1/RNASET2/SSH1/FBN1/ZNF83/RBM8A/PIBF1/CTDSP2/IKZF4/STAG2/SSR2/PDCL/ZNF136/S100A4/CFLAR/TASOR/ENOSF1/TGFBR3/ARHGAP17/ZNF24/SFRP1/CASP6/ATP8B1/DARS1/ENAH/ATP10D/ADGRA3/SMARCC1/TNC/LARP7/ZB…
SHEDDEN_LUNG_CANCER_GOOD_SURVIVAL_A4	196	0.526672	1.74443	1.19312e-05	0.000132717	8.51101e-05	4334	tags=41%, list=10%, signal=37%	DAAM2/PON3/CYP2B7P/MAOA/ZBTB16/TNS2/HOPX/KCNS3/AK1/CITED2/CD55/SLC39A8/PARM1/APOD/ALOX15B/ADGRF5/EPB41L1/ARRB1/PRKCD/MEGF9/SFTPB/CYB5A/EPHX1/TIPARP/FOLR1/SLC34A2/GPD1L/PMM1/BTG3/SLC25A16/NINJ2/BLVRA/ST3GAL5/SPTB/NPR1/APLP2/GPRC5A/ZNF750/CAPN2/SLC7A10/ALDH5A1/PON1/FTH1/NBPF10/CYP2B6/AHCYL2/MBIP/CAVIN2/STBD1/NEDD9/FMO5/C1orf116/ME3/NEDD4L/EFEMP1/VAMP5/CPM/SFTPA2/MR1/CAMTA2/CDS1/NAB2/EDEM1/TMEM243/S…
BILD_HRAS_ONCOGENIC_SIGNATURE	248	-0.454329	-1.62488	1.22806e-05	0.00013628	8.7395e-05	3886	tags=37%, list=9%, signal=34%	LRAT/KDM6B/HK2/MAP7D1/ZNF273/SERPINB1/IER2/ARHGAP27/SLC9A1/CD274/ANGPTL4/CYREN/IL1B/XIST/AHNAK2/EPHA4/CCL20/SLC16A3/LYN/MALL/TNRC6A/COL27A1/CLCF1/FAM110C/PTHLH/IL1A/TOR1AIP1/LHFPL2/PTGS2/DENND2B/SEMA4C/SRRM2/ELK3/SFN/SREK1IP1/PPP1R15A/EPHA2/ADRB2/DLL1/C2CD5/LPAR2/PIM1/STX1A/FLNB/MTUS1/ABCA1/SMTN/NFIB/VANGL2/MMP14/C6orf141/CASP1/ZKSCAN8/ARNTL2/KANK4/MID1/CCNL1/CASP2/EGR1/IER3/PLAUR/HBEGF/SERPINB2/…
KEGG_PEROXISOME	78	0.6377	1.8927	1.26377e-05	0.000139886	8.97076e-05	4974	tags=49%, list=11%, signal=44%	ACOX2/ACSL5/PRDX1/BAAT/SOD1/ACAA1/IDH1/SCP2/ABCD3/PEX16/CRAT/PEX11B/EPHX2/MPV17/ACOT8/HMGCL/PRDX5/PEX6/PEX3/PEX19/PHYH/ECH1/HACL1/MLYCD/HSD17B4/DHRS4/NUDT19/ACSL1/MVK/CROT/PEX5/PEX1/AGPS/MPV17L/PECR/ABCD1/PEX14/SLC25A17/GSTK1
REACTOME_METABOLISM_OF_NUCLEOTIDES	99	0.604155	1.85019	1.26653e-05	0.000139886	8.97076e-05	4183	tags=36%, list=10%, signal=33%	RRM2B/GLRX/NUDT16/TXNRD1/APRT/ATIC/CDA/AK1/NT5E/IMPDH1/GPX1/GSR/IMPDH2/NME1/NME2/LHPP/GUK1/ITPA/TXN/ADSL/ENTPD6/GMPR2/ADK/GART/GMPR/PAICS/ADSS2/PUDP/CTPS1/NUDT9/AK2/CMPK1/DCTD/NUDT5/ADA/AK6
SINGH_NFE2L2_TARGETS	14	0.903063	1.95717	1.30905e-05	0.000143903	9.22835e-05	2423	tags=79%, list=6%, signal=74%	NQO1/TXNRD1/G6PD/ME1/PRDX1/GSR/ABCC2/GCLC/TXN/GSTM4/ABCC1
REACTOME_TCR_SIGNALING	119	0.576721	1.81574	1.30821e-05	0.000143903	9.22835e-05	4846	tags=44%, list=11%, signal=39%	INPP5D/PSME2/PSMD8/RPS27A/PSMA7/PDPK1/PSME1/PSMD1/PSMB5/PSMB6/PSMD9/PSMB10/PSMD14/PSMC4/PSMA6/PSMD2/PSMD7/SKP1/PSMA3/UBA52/PSMB4/CDC34/PSMD13/UBB/PSMB1/PSMA5/PSMD4/PSMC2/PSMA4/PSMB7/PSMA2/PSMD6/PSMB3/PSME3/UBE2V1/PSMC3/PSMC1/PSMB2/CSK/PSMF1/PSMD11/PSMC6/CHUK/PSMC5/SEM1/CUL1/PSMD12/PSMB8/PSMD3/VASP/CD3E/PSMB9
PUJANA_BREAST_CANCER_LIT_INT_NETWORK	101	-0.573641	-1.84775	1.31813e-05	0.000144562	9.27062e-05	5326	tags=50%, list=12%, signal=44%	RBBP8/E2F1/RAD9A/DHX9/EMSY/AKT1/SMC1A/CDC25A/CREBBP/RB1/KAT2B/NBN/HDAC2/MYC/MRE11/SP1/ABL1/RFC1/RAD51/ZNF350/CLSPN/FANCA/BRCA2/MSH6/CCNB1/KPNA2/EP300/AURKA/ATM/PLK1/MSH2/FANCG/TP53BP1/BLM/FANCD2/MCM3/RFC4/LMO4/AR/CDC25C/H2AX/NFKBIA/CDK1/CHEK1/NMI/CDK2/FLNA/BARD1/CCNA2/BUB1B
NADLER_OBESITY_DN	50	0.708411	1.94642	1.32356e-05	0.000144819	9.28706e-05	2046	tags=42%, list=5%, signal=40%	GNAI1/ALDH2/EEF1A1/MCCC1/ECHS1/CYC1/COX8A/DDT/PC/SOD1/PPA1/SDHB/APOE/BCAT2/LDHB/RASD1/UQCRC2/ATP5ME/PYGB/RBP4/UBB
REACTOME_HOMOLOGOUS_DNA_PAIRING_AND_STRAND_EXCHANGE	42	-0.718117	-2.02036	1.3281e-05	0.000144977	9.29721e-05	3486	tags=57%, list=8%, signal=53%	TOP3A/NBN/RAD9B/MRE11/EXO1/RAD51D/RMI2/RAD51/RFC3/BRCA2/XRCC3/RHNO1/BRCA1/DNA2/RFC5/ATM/XRCC2/BLM/TOPBP1/RAD51AP1/RFC4/BRIP1/CHEK1/BARD1
REACTOME_MET_ACTIVATES_PTK2_SIGNALING	30	-0.765497	-2.00954	1.3626e-05	0.000148396	9.5165e-05	3475	tags=50%, list=8%, signal=46%	LAMB1/COL27A1/COL5A1/COL1A2/MET/COL1A1/LAMC1/LAMC2/COL5A2/SRC/COL3A1/COL2A1/LAMA3/COL11A1/LAMA5
IVANOVA_HEMATOPOIESIS_STEM_CELL_LONG_TERM	213	-0.469813	-1.66309	1.37766e-05	0.000149689	9.5994e-05	4171	tags=33%, list=10%, signal=30%	ZMYND11/RASAL2/SCAPER/AKAP9/NSRP1/PTPN21/P2RX4/TMEM144/CNTN1/BACE2/SIX5/ZRANB1/JAG2/MGA/EFNB2/FILIP1/CGNL1/CCDC112/PROX1/GBP6/PHLPP1/TINF2/SRGAP1/ARHGEF10/FKBP7/ZFP1/PRDM16/TRAF1/LPP/HOXA3/ATXN1/ANKZF1/ZBTB20/ST8SIA4/ZBTB39/FMN2/CCSER1/MET/SLC16A9/ZNF268/SKI/OCLN/ZNF784/CRIM1/PCDH9/DSG2/ZNF260/GPRC5B/FAM168A/LARGE1/EFNA4/HBEGF/RBP1/ADAM22/IFT122/SYNPO/SLC12A2/COL18A1/ZDHHC17/BEND5/PCGF2/HAVCR1/CL…
ELVIDGE_HIF1A_AND_HIF2A_TARGETS_UP	41	0.743513	1.96229	1.38494e-05	0.000150132	9.62778e-05	5741	tags=71%, list=13%, signal=62%	IDH3A/WDR77/RRS1/CCND3/CCDC86/SRM/HSPA4/SLC35C1/RPP40/RRP12/SLC35B1/GYG1/STX3/HSPH1/CORO1A/TOR3A/FLAD1/RFK/LSG1/OSTM1/ABCF2/SLC29A1/CHUK/ABCF2/RPP25/POLR3K/SLC25A44/RMC1/AREL1/SLC5A6
REACTOME_NUCLEAR_ENVELOPE_BREAKDOWN	53	-0.682044	-1.9904	1.41714e-05	0.000153267	9.82887e-05	3611	tags=40%, list=8%, signal=36%	NUP85/NUP37/LEMD3/NUP160/VRK1/NUP58/VRK2/CCNB1/PLK1/NUP54/NUP153/NEK6/NUP62/TPR/NUP107/CCNB2/CDK1/LMNB1/TMPO/NUP210/NDC1
REACTOME_G1_S_DNA_DAMAGE_CHECKPOINTS	68	0.664468	1.92498	1.45116e-05	0.000156585	0.000100416	4432	tags=66%, list=10%, signal=60%	CDKN1A/PSME2/PSMD8/RPS27A/PSMA7/PSME1/PSMD1/PSMB5/MDM2/PSMB6/PSMD9/PSMB10/PSMD14/PSMC4/PSMA6/PSMD2/PSMD7/PSMA3/UBA52/PSMB4/PSMD13/UBB/PSMB1/PSMA5/PSMD4/PSMC2/PSMA4/PSMB7/PSMA2/ZNF385A/PSMD6/PSMB3/PSME3/PSMC3/PSMC1/CCNE1/PSMB2/PSMF1/PSMD11/PSMC6/PSMC5/SEM1/PSMD12/PSMB8/PSMD3
REACTOME_MTORC1_MEDIATED_SIGNALLING	23	0.831355	1.99405	1.51642e-05	0.00016325	0.00010469	5610	tags=87%, list=13%, signal=76%	RPS6/AKT1S1/RRAGC/YWHAB/LAMTOR3/EIF4B/RRAGA/LAMTOR5/EIF4G1/LAMTOR1/EIF4E/RHEB/LAMTOR4/MLST8/SLC38A9/LAMTOR2/RRAGB/MTOR/EIF4EBP1/RPS6KB1
HIRSCH_CELLULAR_TRANSFORMATION_SIGNATURE_UP	241	-0.459196	-1.63289	1.55237e-05	0.000166738	0.000106927	5260	tags=41%, list=12%, signal=36%	CYTH1/NPC1/CFHR3/HERC5/SNAP23/EIF1/MID1IP1/MYD88/PNRC1/ZNF140/PMAIP1/STAT3/ROBO3/IFI35/FGD6/SLC33A1/P2RX4/TAB2/RGS17/SERPINB1/IER2/BCL3/TJP2/RIPK2/STAM/DTWD1/TGIF1/IL1B/TNFAIP1/TRAF4/ZMYM1/UBA6/IL1A/LHFPL2/ANGEL2/RNF41/ITPKA/ADGRG6/RND3/GATAD1/CARHSP1/PROS1/PDE4B/SEMA4C/FYN/LARP6/IRF7/SERPINA1/IL6/OSMR/STC1/EPHA2/SLC1A4/VRK2/ISG20/MTMR11/CA9/ARHGEF2/MOCOS/MTUS1/SAT1/ABCA1/PELI1/DHRS7/TNFAIP8/ZNF4…
BAELDE_DIABETIC_NEPHROPATHY_DN	433	-0.403567	-1.52101	1.59175e-05	0.000170576	0.000109389	4605	tags=31%, list=11%, signal=28%	HNRNPC/FLRT2/TLK1/HSP90B1/MYH9/KIF5B/ACTG1/HNRNPA1/COL4A3/COL4A4/ULK2/IFI35/MYO1B/OTUD4/PMS2P3/SART3/TNNT2/IGFBP2/PTPN14/B4GAT1/NBN/GRK5/PTH1R/XRCC5/UGP2/WT1/LPL/CERS6/RSBN1/PRKACB/YWHAZ/CLIC5/CFLAR/SEPTIN2/TGFBR3/HNRNPDL/PDE4B/SET/HMGN1/LANCL1/SMARCC1/ATXN1/CAMSAP2/FYN/FGF9/ZBTB20/PAPSS1/PRKCI/CXADR/MXRA7/HNRNPA3/COL4A6/MORC3/OSMR/CMAHP/NAB1/PDIA3/LOXL1/AGRN/SRGAP2/HSPA2/SCRN1/FRY/PARP1/RBMS1/MA…
AGUIRRE_PANCREATIC_CANCER_COPY_NUMBER_DN	232	0.492113	1.66327	1.60627e-05	0.000171348	0.000109883	5702	tags=40%, list=13%, signal=35%	VDR/KITLG/ATP5F1A/SLC48A1/FUCA1/NAT1/RPS6/TSPYL1/TOM1/GSR/YARS1/TST/POLR2F/ELOB/MPST/TXN2/MECR/ALPL/AMD1/ZPR1/PDPK1/ATP6V1B2/ATP6V0C/ZNF593/GALE/LYPLA2/EIF4B/RARG/CD63/VLDLR/RRAGA/MICAL1/HMGCL/HEBP2/TXNL4A/MFSD5/GNS/SMARCA2/GATB/PDSS2/PFDN5/ORMDL2/IL20RA/AMDHD2/GTF2E2/GCAT/C12orf29/GGT1/ARF3/KCTD17/UBXN8/PIGV/SMUG1/PRKAG1/BLOC1S1/SMPD2/GOSR2/EIF3D/XPC/PUM3/PTTG1IP/RBFA/ASCC2/XPOT/AK2/MIEF1/TOMM22…
KEGG_CELL_ADHESION_MOLECULES_CAMS	129	-0.533626	-1.76947	1.60293e-05	0.000171348	0.000109883	4000	tags=31%, list=9%, signal=28%	HLA-E/SELE/CLDN10/CNTN1/SDC3/CD274/NLGN3/CNTNAP1/CD226/CLDN4/NEGR1/CLDN1/ITGA6/ITGB8/CNTNAP2/HLA-A/MPZL1/CLDN18/NECTIN1/OCLN/CD276/CDH1/CD99/ITGA4/PTPRF/NEO1/NECTIN3/SDC2/CLDN5/NRXN3/NLGN2/NLGN1/PTPRM/GLG1/CDH3/CDH4/CLDN3/CADM1/VCAN/CDH2
KAYO_AGING_MUSCLE_DN	122	0.562953	1.78026	1.6286e-05	0.000173335	0.000111158	3340	tags=38%, list=8%, signal=35%	CTSH/ATP5F1A/H2BC21/IMPDH1/CFP/RPS18/FH/COX8A/VDAC2/POLR2F/RPL31/COX6A1/SDHB/ATP5PF/PABPC4/ATP5MC3/RPS7/NDUFV2/PIGF/RPS25/SLC25A46/UQCRH/COMT/SERINC3/VLDLR/EIF2S1/PSMA6/MDH1/ELOC/SLC6A3/SURF1/BYSL/IRX5/UBB/TOP1/ATP5F1C/HADH/QARS1/ALDH9A1/GGT1/NIPA2/NEU1/TFPI2/MARK3/PSKH1/MERTK/AIMP1
MUELLER_PLURINET	299	-0.429309	-1.57182	1.64176e-05	0.000173945	0.000111549	3983	tags=36%, list=9%, signal=33%	KIT/SYNCRIP/FBP1/CENPE/BCL2/PNN/EXOSC9/TGIF1/TRIP13/RASL11B/XRCC5/ZNF165/MBD2/HDAC2/MYC/FEN1/HSPA14/MRE11/WDR33/COIL/EXO1/SP1/SRSF2/SALL4/ZFP42/CASP6/POLD1/SET/RECQL4/FUBP1/SMARCC1/HAUS1/HMMR/GRB7/RAD51/ITGB3BP/CXADR/SIRT1/EWSR1/PHF10/HNRNPK/TMSB4Y/HSPA2/LSM6/ORC1/PARP1/SRSF1/RFC3/MSH6/GPRIN2/CCNB1/KPNA2/AURKA/CDT1/RBPMS/PSIP1/RFC5/DNMT3B/CHAF1A/POLQ/PBX1/MSH2/EXOSC8/FUS/SMARCAD1/MCM2/GMNN/BLM/NU…
BOYAULT_LIVER_CANCER_SUBCLASS_G23_UP	53	-0.679172	-1.98202	1.63814e-05	0.000173945	0.000111549	4035	tags=60%, list=9%, signal=55%	UBE2S/DBF4/SLC38A1/RRAGD/FEN1/H2AZ1/TYMS/CCNE2/SFN/OIP5/ABCG1/SUZ12/RRM1/IGF2BP3/NEK2/MCM2/PKM/COCH/ECT2/HLTF/MCM3/NARF/MCM6/NDUFA4L2/CENPA/CENPU/MKI67/SMC2/USP1/KIF4A/DLGAP5/BUB1B
YANG_BCL3_TARGETS_UP	331	-0.420085	-1.54439	1.69957e-05	0.000179664	0.000115216	2581	tags=27%, list=6%, signal=25%	SCLT1/RSAD2/CEP128/JADE1/CDC20/PARPBP/CCNE2/FGF9/IRF7/CXADR/TGFB3/IRF6/OSBPL1A/IL6/RAPGEF5/EIF2AK2/GATM/PGM2/REM2/CCNB1/PCSK5/AURKA/ABCA1/TF/SERPINI1/NEDD4/CDKN2C/EDN1/HUNK/KIF2C/AGPAT4/CNR1/RRM2/FAM111A/ECT2/PBK/GNB4/RAD51AP1/TAF9B/PIMREG/GPX7/SERPINB2/UBE2T/NID2/VWA1/C1R/CKAP2/RACGAP1/ACSL3/TRAIP/CENPI/CDCA2/UCP2/KIF22/KIF20B/SLC2A3/FAM83D/KIF20A/AASS/KNTC1/MKI67/CCNB2/TACC3/SAPCD2/EPHA3/CDK1/B…
REACTOME_INTRACELLULAR_SIGNALING_BY_SECOND_MESSENGERS	301	0.46311	1.59473	1.73055e-05	0.000182527	0.000117052	4905	tags=37%, list=11%, signal=33%	CDKN1A/KITLG/PSME2/PSMD8/PRKCD/CAMK2G/FOXO1/SNAI2/PRKCA/CALM1/PRKCE/TGFA/AKT1S1/RRAGC/RPS27A/PSMA7/PDPK1/STUB1/AHCYL1/CBX6/PRKAR2B/MAPK3/PSME1/PRKACA/PSMD1/PSMB5/MDM2/PSMB6/LAMTOR3/PSMD9/RPS6KB2/PIP4K2A/PSMB10/PSMD14/PSMC4/NBEA/PIK3CD/RRAGA/PIK3R3/GRB2/RHOG/LAMTOR5/PSMA6/PSMD2/PSMD7/CSNK2B/PSMA3/UBA52/PSMB4/LAMTOR1/SCMH1/PSMD13/UBB/PSMB1/TRIM27/PSMA5/PSMD4/ADCY9/PSMC2/PSMA4/PSMB7/PSMA2/PPP2R5A/IR…
REACTOME_MTOR_SIGNALLING	40	0.738242	1.92721	1.73477e-05	0.00018256	0.000117074	6324	tags=72%, list=15%, signal=62%	RPS6/AKT1S1/RRAGC/YWHAB/LAMTOR3/EIF4B/RRAGA/LAMTOR5/PRKAG2/EIF4G1/LAMTOR1/PRKAB2/EIF4E/RHEB/LAMTOR4/PRKAG1/STK11/CAB39/MLST8/SLC38A9/LAMTOR2/RRAGB/TSC1/MTOR/EIF4EBP1/AKT2/RPS6KB1/PRKAB1/TSC2
REACTOME_REGULATION_OF_PLK1_ACTIVITY_AT_G2_M_TRANSITION	87	-0.599647	-1.87937	1.82713e-05	0.00019142	0.000122755	4188	tags=52%, list=10%, signal=47%	CEP63/AKAP9/AJUBA/NEDD1/HAUS2/PPP1R12A/CKAP5/ODF2/CLASP1/CEP164/PPP1CB/FGFR1OP/PCNT/HAUS1/BORA/CCP110/CDK5RAP2/HAUS6/SFI1/CEP41/CEP250/HAUS3/UBC/CCNB1/CEP57/AURKA/HAUS8/PLK1/NEK2/PCM1/PPP1R12B/CEP192/NINL/ALMS1/TUBA1A/NDE1/CCNB2/CEP78/CDK1/CENPJ/PLK4/CNTRL/CEP135/HAUS4/TUBB
REACTOME_RESOLUTION_OF_D_LOOP_STRUCTURES	34	-0.738743	-1.98113	1.82374e-05	0.00019142	0.000122755	5749	tags=68%, list=13%, signal=59%	RBBP8/RTEL1/SLX4/WRN/TOP3A/NBN/MRE11/EXO1/RAD51D/RMI2/RAD51/BRCA2/XRCC3/BRCA1/DNA2/ATM/XRCC2/EME1/BLM/GEN1/RAD51AP1/BRIP1/BARD1
SANA_RESPONSE_TO_IFNG_DN	87	0.626269	1.8948	1.84426e-05	0.000192783	0.00012363	3085	tags=39%, list=7%, signal=36%	NQO1/ARHGDIB/TNFRSF10D/TUBA4A/RPSA/HSPD1/PRDX1/KRT7/EI24/THSD4/CCT3/OAT/UQCR10/NDUFA4/CCT5/RPLP0/ATP5PB/TPT1/GASK1B/RPS3A/TIMM17A/RPL10A/PA2G4/HSP90AB1/RPL6/PRKAG2/HMGCL/SLC25A3/CCT4/POLD2/CCNB1IP1/MGST3/TXNDC5/UTP4
CHIANG_LIVER_CANCER_SUBCLASS_UNANNOTATED_DN	193	0.506474	1.67561	1.8641e-05	0.000194214	0.000124548	5316	tags=49%, list=12%, signal=43%	SNX2/GNAI1/ATIC/ATP6V0D1/SLC25A5/CITED2/RPL7A/C1QBP/BAX/PSMD8/ATP1A1/RPS16/EPDR1/NDUFA4/MRPS12/MRPS23/HSPA8/UQCRFS1/FARSA/ATG3/RACK1/GFM2/MCTS1/WARS1/PIGF/ABHD6/HSP90AB1/TPD52L1/TM9SF2/SCAMP3/DCTN3/WDR61/DNAJA1/PSMG1/PGD/LAMTOR5/MRPL39/C1GALT1C1/DCUN1D5/ARPC1A/PSMA5/SEC11A/TP53RK/SLC39A6/EBPL/EMC4/CCT4/PSMA2/YBX1/MRPL13/UXT/WDSUB1/STOML2/NEU1/PPIL1/PRDX4/MMGT1/DAD1/PSMC3/ME2/LYZ/MRPL44/COPS3/MRPL…
REACTOME_SIGNALING_BY_BMP	27	-0.784487	-2.02417	1.86625e-05	0.000194214	0.000124548	3274	tags=56%, list=8%, signal=51%	SMURF2/SMURF1/CER1/SMAD9/BMPR1A/UBE2D1/SKI/SMAD5/ACVR2B/SMAD4/BMPR2/GREM2/SMAD1/CHRDL1/FSTL1
KEGG_STEROID_HORMONE_BIOSYNTHESIS	53	0.69496	1.9136	1.90896e-05	0.000197595	0.000126715	7227	tags=51%, list=17%, signal=43%	AKR1C2/AKR1C1/CYP1A1/SRD5A1/HSD17B2/CYP1B1/UGT2B11/AKR1C3/UGT1A3/STS/SULT1E1/COMT/HSD17B12/UGT1A1/AKR1D1/UGT1A6/SRD5A3/CYP17A1/SRD5A2/HSD3B2/AKR1C4/UGT1A5/HSD17B8/CYP3A7/CYP3A5/CYP19A1/CYP3A4
GAUSSMANN_MLL_AF4_FUSION_TARGETS_F_UP	181	-0.493872	-1.70429	1.91139e-05	0.000197595	0.000126715	5072	tags=41%, list=12%, signal=37%	RBM26/IFI44/PIK3IP1/BTG2/CARD10/PNRC1/CNN1/ARHGEF3/AUTS2/DNASE2/TDRD3/LRRCC1/TMEM176B/SSBP4/TMEM176A/SERPINB1/SERF1A/PRICKLE1/TNFRSF11B/SCN3A/AHR/JARID2/ADAMTSL4/EPHA4/PIBF1/TTC30B/NUAK1/GSTM1/SPRY1/LDB3/ADGRG6/ENY2/RGS4/TGFB3/EGFR/SELENOP/HNRNPA3/OSMR/ARHGAP28/IFIH1/AFAP1L2/PCDHB15/EMILIN2/LGALS3BP/PTP4A3/TOX/NSD1/DKK3/SCARA3/IL4R/TMEM141/IL17RD/OSR1/CLMN/PDGFB/ECHDC2/PREX2/DRAM1/SYNPO/ARSB/PLCE…
GARGALOVIC_RESPONSE_TO_OXIDIZED_PHOSPHOLIPIDS_TURQUOISE_DN	56	-0.659044	-1.92818	1.90427e-05	0.000197595	0.000126715	3296	tags=45%, list=8%, signal=41%	NEIL3/PLCXD1/E2F8/NXF1/ENOSF1/CDC20/OSGEPL1/AURKA/CCNF/PLK1/CDKN2C/SPC24/FAM111A/SGO2/NDC80/MKI67/TACC3/FAM111B/KIF15/BARD1/CCNA2/TMPO/SKP2/KIFC1/BUB1B
SMID_BREAST_CANCER_NORMAL_LIKE_UP	461	-0.395277	-1.49162	1.9204e-05	0.000198089	0.000127032	6023	tags=27%, list=14%, signal=24%	IL27RA/PDGFRA/DST/FLI1/CTSW/CCDC102B/IL21R/PLCL2/NPR2/HGF/RUNX1T1/TFPI/CYTL1/TESC/DPP4/CXCR5/CELF2/LRMP/PTPRC/SPIB/PLPP3/BIRC3/PIK3R1/TRAF3IP3/PTGDS/RUNX3/KCTD7/CCL2/CD38/ANGPT2/FLRT2/BCL11B/DEF6/LTB/PALMD/CNN1/PPP3CC/RNF125/ROBO3/CD72/KIT/SLCO3A1/SELE/DOCK10/GPR183/FLT3LG/SERPING1/PTN/FXYD1/GPR171/LPL/ODAM/EPHA4/LY75/TEP1/LYN/MALL/ITIH5/TGFBR3/RGS5/SFRP1/PDGFD/FMNL1/PROS1/POU6F1/CD37/LPCAT4/FYN/…
GROSS_HYPOXIA_VIA_ELK3_UP	208	-0.472381	-1.66619	1.98287e-05	0.000204083	0.000130876	4456	tags=40%, list=10%, signal=36%	CDC25A/PKD1/KANK2/PIAS3/ARPP19/PARVA/MAT2A/MKNK2/AJUBA/SLC9A3R1/NAIP/RAMP2/HELLS/BCL6B/SSH1/ZBTB14/TNRC6A/DDX39B/TUBA1C/EXO1/POLA2/SRSF2/BCL7A/SRSF5/ARL6IP1/CDC23/ULK1/CAV2/RGS12/CORO1C/MARCKS/SRSF10/NRARP/SRSF1/LGALS3BP/EFNA5/SKI/AMOTL2/CCNB1/KPNA2/ABCG1/CBFB/NEDD4/IGDCC3/H6PD/CDKN2C/APLN/MAPK14/CD276/RRM2/PBK/TOPBP1/PHLDB2/BRD3/AMOT/RACGAP1/SLC12A2/STMN1/CDCA5/NECTIN3/NDC80/KIF20A/CENPA/COL4A2/…
IRITANI_MAD1_TARGETS_DN	46	0.715732	1.93346	1.9899e-05	0.000204358	0.000131053	4326	tags=59%, list=10%, signal=53%	RPL12/RPSA/C1QBP/EEF2/EEF1G/AHCY/GPAM/GAS5/RPL18/MYBBP1A/RPL13/PPA1/SRM/NME2/RPL10A/RPL5/HSPA9/WDR74/LONP1/NPM1/MRPS18B/ASS1/UQCRC1/RPL22/BABAM1/FBL/RARS1
FLECHNER_PBL_KIDNEY_TRANSPLANT_OK_VS_DONOR_UP	153	0.543702	1.7604	2.00131e-05	0.000205079	0.000131515	4349	tags=39%, list=10%, signal=35%	ACO2/ATP5F1A/VDAC1/KLHL21/NDUFB5/OAT/CYC1/ANAPC13/RPS23/CDIPT/SARS1/RPL23/RPLP0/RPL11/RPL19/ATP5MC1/TIMM17A/ZPR1/TSFM/RPL35/RACK1/CCT7/PA2G4/OXA1L/TXN/STXBP1/EEF1B2/RPS20/PSMD9/IMMT/RSU1/GSPT1/LAMTOR5/RPS29/SRSF8/PSMB4/TXNL4A/FTH1/PSMA5/LRP10/PSMA4/PSMA2/EMG1/VAMP5/CAPZB/URI1/DAP3/CLTC/CUL4B/EIF3F/MAGED1/DCTD/RAD23A/HAX1/RBPJ/TUBGCP2/TFRC/AASDHPPT/PRPS1/MBOAT7
REACTOME_TRANSCRIPTIONAL_REGULATION_BY_TP53	362	0.450448	1.56858	2.1035e-05	0.00021508	0.000137929	4947	tags=37%, list=11%, signal=33%	TNFRSF10C/RRM2B/CDKN1A/RGCC/TNFRSF10D/TXNRD1/G6PD/FAS/CCNG1/PRDX1/TRIAP1/COX5A/MT-CO2/COX5B/BAX/GPX2/GSR/COX8A/CYCS/SESN2/NDUFA4/PRDM1/POLR2F/ELOB/COX6A1/COX7C/STEAP3/PRELID1/COX6B1/RRAGC/RPS27A/POLR2E/SCO1/SESN1/YWHAB/COX6C/NOC2L/PDPK1/COX4I1/POLR2L/SCO2/BBC3/COX14/MAPK11/TXN/DDB2/MDM2/LAMTOR3/PIP4K2A/CCNH/RABGGTB/LRPPRC/SUPT4H1/TNFRSF10B/RRAGA/TAF10/LAMTOR5/PRKAG2/ELOC/TNFRSF10A/SURF1/TAF4B/NPM…
KEGG_PATHWAYS_IN_CANCER	323	-0.423309	-1.55685	2.13951e-05	0.000218286	0.000139984	5734	tags=36%, list=13%, signal=31%	E2F1/HGF/RUNX1T1/KLK3/XIAP/TCF7L2/ETS1/RXRA/BIRC3/RALGDS/PIK3R1/ITGA2/FGF20/AKT1/ARNT/RAF1/MSH3/HSP90B1/TRAF6/VEGFC/STAT3/CREBBP/PIAS3/COL4A4/AKT3/PIK3R5/RB1/KIT/SHH/STK4/WNT9A/BCL2/NFKB1/FLT3LG/LAMB1/PPARG/TRAF4/HDAC2/MYC/DVL3/CRKL/CTNNA2/MAPK8/ABL1/PTGS2/TRAF1/CCNE2/FGF9/SOS2/RAD51/ARNT2/TGFB3/EGFR/FZD8/COL4A6/IL6/NFKB2/FZD1/ITGA6/PLCG1/MET/TRAF5/BRCA2/CBL/MSH6/SOS1/APC/DAPK1/EP300/KRAS/DAPK2/N…
CHIANG_LIVER_CANCER_SUBCLASS_PROLIFERATION_DN	177	0.521746	1.71249	2.19402e-05	0.000223361	0.000143239	5156	tags=32%, list=12%, signal=28%	PDK4/TAT/SRD5A1/ALDH6A1/DCXR/CPT2/KLF9/RCL1/BAAT/SLC46A3/TST/EPHX1/GRHPR/SLC38A4/HAGH/SCP2/RHOB/GAMT/MYRIP/CYP2J2/CPB2/NAT2/POR/ANGPTL3/GCDH/ALDH5A1/DHRS1/CYP2B6/SLC2A2/HIBADH/HADH/MLYCD/LONP2/DHTKD1/SELENOO/ST3GAL6/FMO3/CYP1A2/AMDHD1/BOK/BLOC1S1/CMBL/SYBU/MTHFD1/CTH/F12/ACYP2/CES2/CCL14/APOA5/CYP27A1/NECAB2/CYP2C8/ACADL/ALDH3A2/ACBD4
REACTOME_NON_INTEGRIN_MEMBRANE_ECM_INTERACTIONS	59	-0.655295	-1.93368	2.22009e-05	0.000225525	0.000144627	4235	tags=46%, list=10%, signal=41%	COL4A3/COL4A4/ITGB4/SDC3/LAMB1/TNC/COL5A1/COL4A6/AGRN/ITGA6/COL1A2/COL1A1/LAMC1/PDGFB/LAMC2/FGF2/COL5A2/COL3A1/COL2A1/DMD/SDC2/LAMA3/COL4A2/COL11A1/LAMA5/COL4A1/PDGFA
GINESTIER_BREAST_CANCER_20Q13_AMPLIFICATION_DN	181	-0.491683	-1.69674	2.23621e-05	0.00022667	0.000145361	5368	tags=42%, list=12%, signal=37%	PHF11/ITSN2/C2orf68/CYTH1/ITFG2/RBM26/LINC01355/AGO4/EPM2AIP1/CDC42SE1/BTN2A1/CCDC77/KHDC4/FNBP4/PHACTR4/QTRT2/PCGF6/CLK3/NSUN4/HLX/ZNF142/PNN/PROSER1/PRRC2A/DDX39B/PARP6/BTAF1/ZNF316/RAPGEF1/ATXN7/SMARCD1/ARHGAP17/SRSF2/CCDC93/TRRAP/PUM1/SET/BRD2/FUBP1/SF1/EWSR1/CHTOP/DENND11/TNIP1/FANCL/DOCK7/TCIRG1/FBXL19/TINAGL1/HNRNPD/CCNJ/MSL2/DAPK2/GPC2/TRA2A/ANKLE2/HNRNPH3/CCNL1/PTBP1/TOPBP1/DDX11/MCM3/NU…
WARTERS_RESPONSE_TO_IR_SKIN	81	0.632107	1.88137	2.28326e-05	0.000230585	0.000147872	4399	tags=47%, list=10%, signal=42%	TNFRSF10C/RRM2B/CDKN1A/RPS27L/FDXR/GDF15/FAS/CCNG1/TGFBI/TRIAP1/NDUFAF8/NINJ1/HSPA4L/SESN1/PAPPA/BBC3/GM2A/BLOC1S2/FBXO22/DDB2/MDM2/CABYR/ACBD6/POLH/CAVIN2/TRIM22/RAD51C/TMEM120B/PPM1D/ALCAM/WDR63/TYMSOS/ANKRA2/TP53TG1/PIDD1/CES2/UNC5B-AS1/TIGAR
MATSUDA_NATURAL_KILLER_DIFFERENTIATION	472	-0.394576	-1.48898	2.28468e-05	0.000230585	0.000147872	3397	tags=29%, list=8%, signal=27%	SERPINB1/WDFY1/SMPD4/B4GALNT1/SOX13/ACTB/AHR/RGS1/PRIM2/IL1B/KCNJ8/STAM2/LY75/C17orf49/FEN1/HOMER2/SV2A/RBM6/TUBB2B/DENND5A/PTGS2/TYMS/DNAH8/MISP/SYT6/TPI1/HIP1/POLG/FBXL3/PPIH/CHAF1B/MAN1A1/CDC23/ZC3H12C/CXADR/MAP4K5/TLE1/ZC3H7A/PFKL/FMN2/SOX6/SIM2/PDLIM4/HEY1/SLC16A2/SOCS2/RIBC2/TULP3/ALDOA/XCL1/MCM7/DOCK7/FBLIM1/ENC1/ICA1/NRGN/CCDC117/SAT1/PLIN2/PHF21A/TF/GALNT3/MAGI1/TCF4/FRMD4B/GCA/DAPK2/ARH…
REN_ALVEOLAR_RHABDOMYOSARCOMA_DN	407	0.434166	1.53145	2.29994e-05	0.000231627	0.00014854	4157	tags=35%, list=10%, signal=32%	NQO1/GLRX/PAPSS2/SNX2/QPCT/GAS6/VDR/ATP6V0D1/MFSD1/NT5E/TGFBI/MSN/TGFBR2/CD81/FTSJ1/AP1S1/SH3BGRL3/CREB3L1/JAK1/CST3/EDIL3/RFTN1/PRKCA/VAT1/TMEM9B/CBR1/BAG3/EPHX1/CLTA/LGALS8/SIDT2/TMEM59/SLC25A1/KLF2/RRAGC/AVPI1/BCAP31/ATP6V0E1/RRBP1/ARPC1B/ENG/IDH1/ATG3/PLEKHB2/PDCD6/OSBPL3/MCTS1/RAB5C/ATP6AP1/AP2S1/ACADVL/CD151/SCP2/NPDC1/TSPAN4/RABAC1/IGFBP6/MAN2B2/NPTN/TMED3/ARHGDIA/COQ10B/PSMD9/CLTB/ATOX1/N…
LUI_THYROID_CANCER_CLUSTER_3	28	0.802493	1.9709	2.33027e-05	0.000234177	0.000150175	4811	tags=82%, list=11%, signal=73%	RPS5/RPS12/ATP5F1A/UQCR11/PSMD8/RPS2/RPL18/RPL18A/SARS1/TMEM147/EIF3K/HSPA8/RPL10A/RPL17/HSP90AB1/LITAF/EIF3G/RPL21/EIF3F/ATXN10/FBL/ERGIC3/CLDN7
GARY_CD5_TARGETS_DN	437	0.423581	1.50477	2.36676e-05	0.000237335	0.000152201	5144	tags=37%, list=12%, signal=33%	TUBA4A/WDR77/CITED2/DANCR/SNHG4/AIMP2/MRPL15/RCL1/COX5A/GAS5/FOXO1/ZDHHC16/MRPS12/EBNA1BP2/CNDP2/NME1/PRELID1/MRPS23/PHB/WDR3/CHST11/GFM1/ATP6V0E1/SNHG14/AMD1/PSMA7/FARSA/MRPL36/TSFM/PNO1/HSPA4/SSU72/RPF1/RPP40/PSMD1/EIF2B4/ADSL/PSMB5/POLR1C/HSPA5/MRPL1/EMB/RRP9/PMPCA/CDK5RAP1/CCT6A/ASCC3/NDUFB7/GTPBP4/SAMM50/BCCIP/DNAJA1/YRDC/EIF2S1/RBM3/MRPS16/MRPL30/MAX/MRPL32/ATP6V1C1/SRSF8/LARP4/GPATCH4/ADI1…
SANSOM_APC_TARGETS_DN	335	0.44713	1.55096	2.38858e-05	0.000238501	0.000152948	5363	tags=32%, list=12%, signal=28%	ARHGDIB/INPP5D/PAPSS2/SRXN1/VDR/TCTA/FGD3/ATP6V0B/FAS/TGFBI/ACP5/NAPSA/GGT5/PC/CYB5A/SLC7A8/GPX4/SLC27A4/MLPH/PEPD/ACAA1/ABCC2/PRLR/MAPRE3/CD302/HAGH/OGDH/LIPA/RUNX2/ITGB2/NPDC1/CRAT/SPHK2/SDF4/EPHX2/SLC35B1/NKIRAS1/ADORA2B/PIK3CD/WBP2/WDTC1/JAK2/MIEN1/RMDN3/FAHD1/RBP4/GRINA/ATP6V0A1/GNPDA1/DHRS1/GNS/MCFD2/KEAP1/CD70/CORO1A/BASP1/SLC2A2/MAP3K1/SLC22A4/ALDOB/LTB4R/OTULINL/TLL1/GGT1/MGST3/ABHD8/CD8…
REACTOME_RECRUITMENT_OF_NUMA_TO_MITOTIC_CENTROSOMES	95	-0.582866	-1.84809	2.38571e-05	0.000238501	0.000152948	3564	tags=44%, list=8%, signal=41%	CEP63/AKAP9/NEDD1/HAUS2/MZT1/CKAP5/TUBB2B/ODF2/TUBA1C/CLASP1/CEP164/FGFR1OP/PCNT/HAUS1/CCP110/CDK5RAP2/HAUS6/SFI1/CEP41/CEP250/HAUS3/TUBB1/CEP57/NUMA1/HAUS8/PLK1/NEK2/PCM1/CEP192/NINL/ALMS1/TUBA1A/NDE1/CEP78/CDK1/CENPJ/PLK4/CNTRL/CEP135/TUBA1B/HAUS4/TUBB
REACTOME_CYTOSOLIC_TRNA_AMINOACYLATION	24	0.805099	1.93624	2.3978e-05	0.000238913	0.000153212	4326	tags=83%, list=10%, signal=75%	AIMP2/VARS1/SARS1/YARS1/PPA1/KARS1/FARSA/GARS1/MARS1/EEF1E1/WARS1/FARSB/NARS1/CARS1/HARS1/IARS1/QARS1/AIMP1/EPRS1/RARS1
DAZARD_RESPONSE_TO_UV_SCC_DN	113	-0.545544	-1.76163	2.41011e-05	0.00023963	0.000153672	4626	tags=47%, list=11%, signal=42%	BRD1/SPOP/TLK1/CNOT4/TLK2/PHC2/POGZ/MTF2/TGIF1/ERF/KDM2A/JARID2/TRAF4/CNOT2/CTCF/FOXF2/AGO2/MYC/CRKL/COIL/BRD8/KAT6A/PUM1/FOXJ3/KBTBD2/RAPGEF2/MORC3/PCDHGB7/SIAH1/PHF3/EXT1/AURKA/TNFAIP8/IL4R/E2F2/BLCAP/PATZ1/TNFAIP3/NUP153/WEE1/ADNP/SLK/DDX3Y/FZD2/DYRK1A/BAZ2B/WSB1/MCL1/CENPA/ASAP2/SOX4/ARL4C/KIFC1
REACTOME_TRANSCRIPTIONAL_REGULATION_BY_RUNX2	120	0.567972	1.7923	2.44861e-05	0.000242941	0.000155796	4432	tags=48%, list=10%, signal=44%	CDKN1A/PSME2/BAX/PSMD8/RPS27A/PSMA7/STUB1/PPARGC1A/STAT1/RUNX2/MAPK3/PSME1/PSMD1/PSMB5/ESRRA/PSMB6/PSMD9/PSMB10/PSMD14/PSMC4/HIVEP3/PSMA6/PSMD2/PSMD7/SKP1/PSMA3/UBA52/PSMB4/PSMD13/UBB/PSMB1/PSMA5/PSMD4/ITGA5/PSMC2/PSMA4/PSMB7/CCND1/PSMA2/PSMD6/PSMB3/PSME3/PSMC3/PPM1D/PSMC1/PSMB2/PSMF1/PSMD11/PSMC6/MAPK1/PSMC5/SEM1/CUL1/PSMD12/SATB2/HEY2/PSMB8/PSMD3
RODWELL_AGING_KIDNEY_NO_BLOOD_DN	146	0.549246	1.77833	2.48278e-05	0.000245811	0.000157636	4532	tags=38%, list=10%, signal=34%	CLDN8/MPC1/ALDH6A1/ATP5F1A/KLF9/TMPRSS2/OAT/COX8A/CYCS/THSD7A/NDUFS1/CYB5A/COX7C/HADHB/ATP5MC3/LDHB/COX6C/AHCYL1/GOT2/HSPA9/MMUT/GSTM4/PEBP1/PRDX3/PPM1K/BCKDHB/LRPPRC/APLP2/WDR61/TCTN3/PLPPR1/GATB/COX7B/PHYH/FMO5/NEDD4L/CCNB1IP1/RHOBTB3/DHTKD1/EGF/MT-ND5/DBT/FBXO3/PPP2R1B/SLC16A7/SLC25A36/GABARAPL1/AK2/SOHLH2/FAM83F/CTH/TMEM38B/ISCA1/OXCT1/NEBL
LY_AGING_OLD_DN	56	-0.654303	-1.91431	2.51234e-05	0.000248213	0.000159176	2891	tags=54%, list=7%, signal=50%	SAFB/CKAP5/H2AZ1/PTGS2/TYMS/HMGN2/CDC20/NAE1/PARP1/FBN2/CCNB1/NASP/CCNF/PLK1/KIF2C/MCM2/SERPINB2/MYBL2/CENPA/CKS1B/H2AX/KIF14/CENPF/FOXM1/CXCL8/BARD1/CCNA2/UBE2C/HMGB2/KIF11
REACTOME_DISEASES_OF_SIGNAL_TRANSDUCTION_BY_GROWTH_FACTOR_RECEPTORS_AND_SECOND_MESSENGERS	372	0.428138	1.49732	2.52056e-05	0.000248501	0.000159361	4905	tags=34%, list=11%, signal=30%	CDKN1A/RAP1A/KITLG/PSME2/TGFBR2/PSMD8/ARRB1/MPRIP/CAMK2G/FKBP1A/FOXO1/POLR2F/CALM1/PHB/TGFA/AKT1S1/RPS27A/POLR2E/KAT2A/PSMA7/YWHAB/SND1/ERLEC1/PDPK1/LRP5/POLR2L/MYO18A/STAT1/CDC37/KSR2/LRP6/MAPK3/PSME1/PSMD1/PSMB5/MAP2K2/MDM2/PSMB6/PEBP1/PSMD9/RPS6KB2/PSMB10/PSMD14/PSMC4/PIK3CD/PIK3R3/SPRED3/GRB2/RHOG/PSMA6/PSMD2/PSMD7/JAK2/SKP1/PSMA3/UBA52/PSMB4/PSMD13/UBB/PSMB1/PSMA5/TRAK1/POLR2K/PSMD4/AGTRAP/P…
ELVIDGE_HYPOXIA_BY_DMOG_DN	59	0.667863	1.86942	2.75272e-05	0.000270819	0.000173673	4771	tags=51%, list=11%, signal=45%	ALDH4A1/NAPA/IDH3A/WDR77/CCND3/CEBPA/ACOT7/CALM1/ZMPSTE24/SRM/DOLK/HSPA4/SLC35C1/RPP40/NDUFS6/PIK3R3/JAK2/CORO1A/SDF2L1/TOR3A/PSME3/CTPS1/PUS1/PYCR3/SLC29A1/RPP25/POLR3K/TIGAR/IDE/SLC25A44
REACTOME_CITRIC_ACID_CYCLE_TCA_CYCLE	22	0.836839	1.98067	2.81802e-05	0.000276083	0.000177049	3825	tags=91%, list=9%, signal=83%	ACO2/IDH3A/FH/SUCLG1/SDHB/MDH2/SDHA/SUCLG2/OGDH/CS/SDHD/DLD/SDHC/FAHD1/SUCLA2/IDH3G/ME3/IDH3B/ME2/DLST
XU_HGF_TARGETS_INDUCED_BY_AKT1_48HR_DN	25	-0.793017	-2.01511	2.81538e-05	0.000276083	0.000177049	3438	tags=60%, list=8%, signal=55%	PRPF4B/CARMIL1/HMMR/NFYB/ZNF268/SPC25/CCNL1/SMC4/CENPA/KIF14/CENPF/CDCA3/MCOLN3/GOLGA8A/ASPM
MARTORIATI_MDM4_TARGETS_NEUROEPITHELIUM_DN	156	-0.505733	-1.71975	2.85472e-05	0.000279095	0.00017898	7285	tags=47%, list=17%, signal=40%	DLX6-AS1/VCAM1/PKNOX1/CFL2/STMN3/MPPED2/TTYH1/ELAVL3/C14orf132/PAK1/FGD4/PDGFRA/BRSK2/POU3F4/TMEM26/MAP2/IGFBPL1/TAL1/NOL4/UBXN2A/ELAVL4/C1QTNF3/IGFBP5/SCG3/IRF2BPL/NEUROD1/MYB/RHBDL3/GPM6B/ZRANB1/KAT2B/ATAT1/XIST/NUDT21/LINC00461/ENY2/FYN/RGS4/ST8SIA4/FMN2/RAPGEF5/SCRN1/MDM4/ITGB8/INSIG1/CACNG4/REM2/RSPO2/ERMAP/AGO1/SCARA3/SATB1/FRMD5/C4orf3/ASCL1/SLC4A5/PGM2L1/PCDH9/CNR1/CADM4/PKIA/RBL1/RIPPLY3…
RIZ_ERYTHROID_DIFFERENTIATION_HBZ	36	-0.722418	-1.96897	2.89687e-05	0.000282626	0.000181245	3590	tags=47%, list=8%, signal=43%	KDM5A/NR4A2/PROX1/E2F8/NR2F1/ETAA1/NR5A1/AFF1/MCM7/SIX2/ZNF436/MCM4/MCM5/SOX4/BARD1/TMPO/HMGB1
RIGGI_EWING_SARCOMA_PROGENITOR_UP	432	-0.395955	-1.48922	2.90649e-05	0.000282975	0.000181469	4398	tags=30%, list=10%, signal=27%	BCL11B/ADAMTS3/FAT3/RCOR1/COL4A4/KCNE3/GPR37/CYP26B1/GNA14/SLAIN1/HLA-E/KIT/SSBP4/ZNF91/CALCB/GLCE/JAK3/SHISA3/MCAM/IGFBP2/ZC3H13/CD274/JAG2/SORD/LMO3/CCDC171/JARID2/GRK5/LINGO1/WT1/FARP1/RNASET2/LPL/RRAGD/EPHA4/KRT17/FRK/SLCO5A1/NR2F1/GRP/RSPH3/RGS5/BAMBI/PTGS2/RIMKLB/NTNG1/CTTNBP2/LYPD1/SMARCC1/TNC/DCLRE1B/CLDN1/ST6GAL1/FZD8/SOX6/ADGRG2/FZD1/LRRC4C/ENTPD3/IKZF2/LRATD2/MAP7D2/TCF12/MAMDC2/DAPK1/…
LANDIS_ERBB2_BREAST_PRENEOPLASTIC_DN	57	0.676673	1.88123	2.93068e-05	0.000284739	0.0001826	2773	tags=44%, list=6%, signal=41%	CHCHD10/GNAI1/CPT2/NDUFV1/ETFB/MCCC1/GPAM/ZNF703/UQCR10/HADHB/ACAA1/BCAT2/ATP1B3/SCP2/IGFBP6/DECR1/PDHA1/ALDH1A1/BCKDHB/APLP2/NDUFAB1/ALAD/GYG1/PPP2R5A/ST3GAL6
JOHNSTONE_PARVB_TARGETS_3_UP	431	0.429435	1.52427	2.94818e-05	0.000285846	0.00018331	5115	tags=34%, list=12%, signal=31%	PDK4/KLHL29/ACSL5/HTATIP2/AKR1C1/TKT/SH3BP5/SNHG29/PDCD4/CITED2/CD55/PLAAT3/TNIK/SLC25A39/TGFBI/CREG1/PSAP/TGFBR2/ZNF703/ATP1A1/VIPR1/ARRB1/JAK1/PLBD2/CST3/MMP24OS/MEGF9/H2AJ/SYNGR2/ACY1/MVP/ASAH1/CALM1/VAT1/STEAP3/ERRFI1/RETSAT/VAMP8/NBPF14/LGALS8/TPRG1L/HS1BP3/CTSA/NEAT1/SCNN1A/ABHD14B/TM7SF2/ANXA4/S100A16/ARPC1B/ATP6V0C/TAX1BP1/RAB7A/HPCAL1/OSBPL3/CD9/LIPA/GBA/AKR1C3/ACADVL/PDP1/SLC50A1/TNFAIP…
REACTOME_ASYMMETRIC_LOCALIZATION_OF_PCP_PROTEINS	64	0.667043	1.89853	2.98195e-05	0.000288142	0.000184782	4432	tags=67%, list=10%, signal=60%	PSME2/PSMD8/RPS27A/PSMA7/WNT5A/PSME1/PSMD1/PSMB5/PSMB6/PSMD9/PSMB10/PSMD14/SCRIB/PSMC4/PSMA6/PSMD2/PSMD7/PSMA3/UBA52/PSMB4/PSMD13/UBB/PSMB1/PSMA5/PSMD4/PSMC2/PSMA4/PSMB7/PSMA2/PSMD6/PSMB3/PSME3/PSMC3/PSMC1/PSMB2/PSMF1/PSMD11/PSMC6/PSMC5/SEM1/PSMD12/PSMB8/PSMD3
YAO_TEMPORAL_RESPONSE_TO_PROGESTERONE_CLUSTER_10	69	0.648216	1.88364	2.98418e-05	0.000288142	0.000184782	5041	tags=54%, list=12%, signal=47%	PRDX1/CERS2/VDAC2/HSPE1/POLR2F/GCSH/RRBP1/POLR2L/CCT7/APMAP/SSU72/EIF3G/BCKDHB/COX17/CACYBP/ADK/RANGAP1/TMEM11/PSMA4/TIMM23/SSB/CHCHD7/MPC2/EDF1/NSUN2/GRWD1/DAD1/TRIR/USO1/SEC61A1/MRPL53/DYNLL1/FKBP2/RALA/MRPL40/CLDN7/SERP1
REACTOME_C_TYPE_LECTIN_RECEPTORS_CLRS	138	0.55933	1.80011	3.00195e-05	0.000289262	0.000185501	4432	tags=43%, list=10%, signal=39%	PSME2/PSMD8/PRKCD/CALM1/RPS27A/PSMA7/PDPK1/AHCYL1/PSME1/PRKACA/PSMD1/PSMB5/PSMB6/PSMD9/PSMB10/PSMD14/PSMC4/PSMA6/PSMD2/PSMD7/SKP1/PSMA3/UBA52/PSMB4/CDC34/PSMD13/UBB/PSMB1/PSMA5/PSMD4/PSMC2/PSMA4/PSMB7/RPS6KA5/PSMA2/MUC20/ITPR2/PSMD6/UBE2M/PSMB3/MUC13/PSME3/UBE2V1/PSMC3/HRAS/PSMC1/PSMB2/PSMF1/PSMD11/CARD9/PSMC6/TAB3/CHUK/PSMC5/SEM1/CUL1/PSMD12/PSMB8/PSMD3
SUNG_METASTASIS_STROMA_DN	54	-0.66451	-1.94411	3.04348e-05	0.000292662	0.000187681	5934	tags=57%, list=14%, signal=50%	DTYMK/E2F1/HIPK2/POLE2/PKMYT1/MT1E/KIFC3/UBR7/HELLS/MCMBP/HNRNPF/EGFR/SCRN1/MT1F/MT1X/PARP2/DHRS7/GMNN/NUP153/MCM3/MCM6/CDCA5/CDC45/ZNF367/CENPU/PITPNC1/ARF6/DERA/MCM5/NCAPG2/DEK
FLOTHO_PEDIATRIC_ALL_THERAPY_RESPONSE_UP	52	0.693333	1.89806	3.16908e-05	0.000304115	0.000195026	3064	tags=52%, list=7%, signal=48%	RPS5/RPS19/CTDSPL/RPS28/RPL13A/RPL7/EEF2/EEF1G/RPS6/RPS16/RPL37A/RPLP0/RPS9/TPT1/RPL27/RPL5/RPL17/EIF3L/RPS20/TOMM20/FAU/EIF4B/RPL6/CDC42EP3/RAB14/EIF3D/RPL22
REACTOME_PHASE_II_CONJUGATION_OF_COMPOUNDS	105	0.589018	1.82257	3.19784e-05	0.000306247	0.000196393	5055	tags=39%, list=12%, signal=34%	PAPSS2/SULT1A1/SULT1A2/GSTA2/AHCY/NAT1/UGT2B11/GSTP1/GGT5/CNDP2/ABHD14B/GCLC/UGT1A3/SULT1E1/GSTM4/SULT1A3/NNMT/COMT/TPMT/GGT7/NAT2/GGCT/SLC35B2/GSS/CHAC2/GGT1/MGST3/GSTO1/UGT1A1/CYP1A2/GSTM3/ESD/TPST2/MGST1/UGT1A6/SLC26A1/GSTA1/GSTT2B/GCLM/GSTK1/SULT4A1
MODY_HIPPOCAMPUS_POSTNATAL	56	0.680593	1.89596	3.2166e-05	0.000307415	0.000197142	3035	tags=50%, list=7%, signal=47%	KCNMA1/NAPA/ATP6V1E1/VDAC1/COX8A/BIN1/PRDX6/SDHA/APBB1/VAMP2/LDHB/ATP6V1B2/EEF1A2/ATP6AP1/MAPK3/RASGRF1/STXBP1/RHOB/TYRO3/CLTB/BDNF/DGKZ/MDH1/ATP6V1C1/GRINA/NDUFS2/NDUFB2/HRAS
REACTOME_NUCLEAR_PORE_COMPLEX_NPC_DISASSEMBLY	36	-0.720127	-1.96272	3.38916e-05	0.000323247	0.000207295	3611	tags=56%, list=8%, signal=51%	NUP35/POM121/AAAS/NUP93/POM121C/NUP85/NUP37/NUP160/NUP58/CCNB1/NUP54/NUP153/NEK6/NUP62/TPR/NUP107/CCNB2/CDK1/NUP210/NDC1
WATANABE_RECTAL_CANCER_RADIOTHERAPY_RESPONSIVE_UP	112	0.567652	1.77012	3.4004e-05	0.00032366	0.00020756	3590	tags=44%, list=8%, signal=40%	AKR1C1/GAS6/RAP1A/EEF1A1/ATP1A1/NDUFB5/PRKCD/GPX2/SARS1/RPS13/RPL13/MRPL12/MPST/CTSA/RPS27/RPL36A/AHCYL1/DDB1/VAMP7/ABCD3/PDHB/ATP5ME/NDUFS6/PPID/PYGB/RPL38/TERF2IP/SURF1/FTH1/POLR2K/WDR1/IDH3G/TMEM115/PPP2R5A/HADH/CBLB/ARF4/NUDC/WASHC2C/LAGE3/PRKAG1/DUSP3/DNAJC7/PIP5K1B/MGRN1/CUL4B/DRG1/C9orf16/DDX27
REACTOME_CYCLIN_A_CDK2_ASSOCIATED_EVENTS_AT_S_PHASE_ENTRY	85	0.612	1.84005	3.47501e-05	0.00033009	0.000211683	4846	tags=61%, list=11%, signal=54%	CDKN1A/PSME2/PSMD8/RPS27A/PSMA7/PSME1/PSMD1/PSMB5/PSMB6/PSMD9/CCNH/PSMB10/PSMD14/PSMC4/PSMA6/PSMD2/PSMD7/SKP1/PSMA3/MAX/UBA52/PSMB4/PSMD13/UBB/PSMB1/PSMA5/PSMD4/PSMC2/PSMA4/PSMB7/CCND1/PSMA2/PSMD6/PSMB3/PSME3/PSMC3/PSMC1/CCNE1/PSMB2/PSMF1/PSMD11/PSMC6/CDK7/PSMC5/SEM1/CUL1/PSMD12/PSMB8/PSMD3/E2F4/LIN37/PSMB9
REACTOME_GOLGI_ASSOCIATED_VESICLE_BIOGENESIS	56	0.67933	1.89244	3.55017e-05	0.000336547	0.000215824	3440	tags=50%, list=8%, signal=46%	FTL/SNX2/NAPA/SNX5/AP1S1/ARRB1/VAMP8/HSPA8/CLTA/VAMP2/AP1B1/NECAP1/VAMP7/AP1M2/RAB5C/TPD52L1/SORT1/DNAJC6/FTH1/IGF2R/HIP1R/GAK/CLTC/TXNDC5/AP3S1/BLOC1S1/ARF1/BLOC1S3
REACTOME_ROS_AND_RNS_PRODUCTION_IN_PHAGOCYTES	35	0.758507	1.91825	3.56378e-05	0.000337155	0.000216214	3111	tags=46%, list=7%, signal=42%	ATP6V1A/ATP6V0D1/ATP6V1E1/ATP6V0B/ATP6V0A4/ATP6V1H/ATP6V1F/ATP6V1D/ATP6V0E1/ATP6V1B2/ATP6V0C/ATP6V1C1/ATP6V0A1/ATP6V1G1/ATP6V1G2/ATP6V0E2
PHONG_TNF_TARGETS_UP	63	-0.647508	-1.93365	3.60493e-05	0.00034036	0.00021827	3949	tags=44%, list=9%, signal=40%	CD83/IER2/IRF1/CCL20/PLK2/REL/IL6/ZFP36L2/NFKB2/EPHA2/DUSP10/TNFAIP3/CCNL1/LAMC2/EGR1/IER3/INHBA/MCL1/CEBPD/KDM6A/NFKBIA/CXCL1/LDLR/CXCL8/PTX3/CXCL3/ETS2/CXCL2
MULLIGHAN_MLL_SIGNATURE_1_UP	380	0.445077	1.56059	3.75008e-05	0.000353149	0.000226471	5119	tags=36%, list=12%, signal=32%	HTATIP2/BATF/TFEB/SMPD1/MFSD1/FUCA1/PRDX1/CCND3/CEBPA/PRKCD/COX8A/SYNGR2/SLC25A11/NDUFS7/TXNRD2/SDHB/CALM1/CTSA/TGFA/ATP6V0E1/RRBP1/LYST/BORCS6/SPG21/NDUFB8/ARPC1B/ATG3/PMM1/CD302/CCR1/SDHD/PPIF/PIGF/ITGB2/STS/RNF167/NINJ2/RASSF4/CLTB/MRPL33/MRPL34/SDF4/CLN3/TBCD/TOLLIP/GRN/POLD4/PPID/SMCO4/TNFRSF10B/GRB2/MICAL1/PITPNA/CIAO2B/SNX17/COA3/DEXI/SPCS1/TIMM17B/RAB29/GNS/FRAT2/FAM120A/CLTCL1/SRF/EXOSC4…
RICKMAN_TUMOR_DIFFERENTIATED_WELL_VS_POORLY_UP	242	-0.448422	-1.59649	3.75546e-05	0.000353149	0.000226471	4358	tags=39%, list=10%, signal=36%	B3GALNT1/LTB/FAM13B/GFPT1/MAN2A2/MAT2A/EFHC1/FAM171A1/ZNF322/MYNN/ZNF740/SYNPO2/POGZ/CBFA2T2/CGNL1/CREB3L4/FARP1/TRAF4/BOLA1/CENPV/AGO2/ZNF180/PHKA2/ZBED5/NR2F1/TRA2B/BCL7A/RMI2/IPO9/FUBP1/SRRT/NONO/ZBTB39/MED12/H1-10/SIM2/ROBO1/RBM39/MDM4/PARP1/TRAF5/SRSF1/SRSF6/SPRY2/TGIF2/MAP7D2/MSH6/SOS1/AHSA2P/NASP/ZNF704/ZNF496/XPO1/PKDCC/MSL2/SCARA3/PBX1/HNRNPU/ZCCHC3/GINS1/TNRC18/ARHGAP19/NUCKS1/ACVR2B/NF…
REACTOME_MAPK6_MAPK4_SIGNALING	91	0.601945	1.8403	3.88082e-05	0.000363985	0.00023342	4432	tags=52%, list=10%, signal=46%	PSME2/CCND3/PSMD8/FOXO1/RPS27A/PSMA7/PSME1/PRKACA/PSMD1/PSMB5/PSMB6/PSMD9/PSMB10/PSMD14/PSMC4/PSMA6/PSMD2/PSMD7/PSMA3/UBA52/PSMB4/PSMD13/UBB/PSMB1/PSMA5/PSMD4/ETV4/PSMC2/PSMA4/PSMB7/PSMA2/PSMD6/PSMB3/CDC42EP3/PSME3/PSMC3/PSMC1/CDC42EP5/PSMB2/PSMF1/PSMD11/PSMC6/PSMC5/SEM1/PSMD12/PSMB8/PSMD3
KAAB_FAILED_HEART_ATRIUM_DN	147	0.542199	1.75963	3.88623e-05	0.000363985	0.00023342	4121	tags=41%, list=9%, signal=38%	ACOX2/LYPLA1/PRDX1/TGFBR2/EI24/FKBP1A/GSTP1/TMEM147/COX6A1/EIF3I/VAT1/MPST/SERPINA3/SNU13/NME2/ATP6V0E1/DDX21/GTF3A/AMD1/PLEKHB2/PDCD6/VAPB/WARS1/TXN/CD59/PSMB5/BLVRB/CNIH1/NPTN/PIR/PSMD9/ABCB6/RRAGA/GRB2/SDF2/STX4/ELOC/GDE1/PSMA3/PSMB4/ADRM1/GLUD1/PSMB1/PARVB/VTI1B/NUDT3/PSMB3/PIGH/MLEC/WASHC2C/LAGE3/GSTM3/GPR137B/CTTN/RAB9A/TSC22D1/PPP1CC/GPC4/IFNGR1/CCZ1/RAB1A
FARMER_BREAST_CANCER_BASAL_VS_LULMINAL	326	-0.412896	-1.51609	4.01395e-05	0.000375196	0.000240609	4217	tags=36%, list=10%, signal=33%	GPM6B/LASP1/TFF3/SLC35E2A/LIMA1/SYNCRIP/TFF1/FBP1/EFHC1/FAM171A1/SLC9A3R1/CEBPG/BCL2/CDK17/NRTN/IL6ST/ACTL6A/AGR2/CIRBP/VGLL1/SLC16A1/CERS6/LYN/SLC9A6/HDAC2/MYC/WDR19/U2SURP/TRIM2/DSC3/APBB2/RGS5/PDGFD/SLC2A10/RIF1/PPP1CB/HSPB1/CDC20/SPRED2/SLC43A3/TGFB3/NUDT4/SREBF1/EFCAB11/FABP5/ST6GALNAC2/CORO1C/ADIRF/CLIC4/KLHL7/TFAP2A/GLS/TBC1D9/UGT8/PRKD3/FAM174B/PLIN2/RNF138/PELI1/NFIB/DHRS7/YEATS2/PBX1/DN…
REACTOME_FLT3_SIGNALING	261	0.471843	1.61097	4.03697e-05	0.000376596	0.000241507	4432	tags=32%, list=10%, signal=29%	RAP1A/KITLG/PSME2/PSMD8/ARRB1/JAK1/PAQR3/CAMK2G/CALM1/SPTBN2/PHB/TGFA/RPS27A/PSMA7/YWHAB/PDPK1/NCAM1/KSR2/MAPK3/PSME1/RASGRF1/PSMD1/PSMB5/MAP2K2/SPTB/PSMB6/LAMTOR3/PEBP1/PSMD9/SPTBN5/RASGRF2/PSMB10/PSMD14/PSMC4/SPRED3/GRB2/PSMA6/PSMD2/PSMD7/JAK2/PSMA3/UBA52/PSMB4/PSMD13/UBB/PSMB1/PSMA5/PSMD4/PSMC2/PSMA4/PSMB7/PSMA2/PPP2R5A/IRS2/PSMD6/PSMB3/EGF/MARK3/PPP2R1A/CUL3/PSME3/PSMC3/HRAS/PSMC1/PPP2R1B/ANG…
KEGG_RNA_POLYMERASE	29	0.780778	1.93294	4.09713e-05	0.000381448	0.000244619	6149	tags=67%, list=14%, signal=57%	POLR2F/POLR3H/POLR2E/POLR2L/POLR1D/POLR1C/POLR2K/POLR2I/POLR2J/POLR3K/POLR2G/POLR1E/POLR2J3/POLR1B/POLR3D/POLR3B/POLR2D/POLR1A/POLR3A/POLR2H
SCHLOSSER_MYC_TARGETS_AND_SERUM_RESPONSE_DN	48	0.699253	1.89997	4.19105e-05	0.000389418	0.00024973	4196	tags=54%, list=10%, signal=49%	RRS1/FTSJ1/RSL1D1/EBNA1BP2/AKAP1/NOP14/TIMM17A/UCHL3/DDX21/AMD1/HSPA9/PA2G4/RPP40/BYSL/UTP18/PAICS/URI1/PRDX4/IRAK1/PRNP/CEBPZ/DKC1/FBL/CUL1/MRPL19/EXOSC7
YAO_TEMPORAL_RESPONSE_TO_PROGESTERONE_CLUSTER_14	144	0.54201	1.75443	4.2537e-05	0.000394457	0.000252961	5223	tags=43%, list=12%, signal=38%	ERGIC1/BAX/TMEM97/VARS1/CCT3/NOP16/TMEM147/PPA1/EBNA1BP2/NME1/MRPL12/GPS1/UQCC2/PABPC4/CLPTM1L/EIF2B5/SND1/CS/CISD1/PSMD1/PSMB5/ARHGDIA/NHP2/TMEM14C/CALCA/CCT8/PES1/EIF4G1/WDR74/NARS1/TOMM70/MRPS18B/PREP/ASL/MRPL20/MYDGF/YKT6/PSMD6/UBE2M/HTRA2/PRELID3B/PSMB3/MRPS10/NSUN2/MLEC/IRAK1/GOLGA5/SSR3/C9orf16/SEC61A1/RWDD1/LMAN2/PIGQ/FBL/TBCB/RARS1/C6orf136/PPP1R14B/GGA1/CTSD/SERPINE2/THOP1
REACTOME_DEUBIQUITINATION	275	0.465825	1.59271	4.44194e-05	0.000411099	0.000263634	5248	tags=38%, list=12%, signal=34%	H2AC6/PSME2/USP18/H2BC21/VDAC1/H2BC12/TGFBR2/PSMD8/ARRB1/VDAC2/H2BC4/RPS27A/UCHL3/KAT2A/PSMA7/RNF123/H2BC5/PSME1/PSMD1/FKBP8/PSMB5/DDB2/NEDD8/TOMM20/MDM2/OTUD7A/PSMB6/H2BC8/PSMD9/PSMB10/PSMD14/PSMC4/H2AC19/TAF10/PSMA6/PSMD2/PSMD7/PSMA3/UBA52/PSMB4/TOMM70/PSMD13/ADRM1/KEAP1/UBB/PSMB1/RNF128/PSMA5/PSMD4/PSMC2/PSMA4/PSMB7/OTUD5/MUL1/PSMA2/RHOT1/PSMD6/TRAF3/PSMB3/VCP/H2BC18/MAVS/PSME3/USP15/PSMC3/PSM…
REACTOME_RECRUITMENT_OF_MITOTIC_CENTROSOME_PROTEINS_AND_COMPLEXES	81	-0.596787	-1.84792	4.56117e-05	0.000421301	0.000270176	4188	tags=46%, list=10%, signal=41%	CEP63/AKAP9/NEDD1/HAUS2/MZT1/CKAP5/ODF2/CLASP1/CEP164/FGFR1OP/PCNT/HAUS1/CCP110/CDK5RAP2/HAUS6/SFI1/CEP41/CEP250/HAUS3/CEP57/HAUS8/PLK1/NEK2/PCM1/CEP192/NINL/ALMS1/TUBA1A/NDE1/CEP78/CDK1/CENPJ/PLK4/CNTRL/CEP135/HAUS4/TUBB
DAZARD_RESPONSE_TO_UV_NHEK_UP	219	0.489474	1.63955	4.9292e-05	0.000454398	0.000291401	4826	tags=40%, list=11%, signal=36%	TCN1/QPCT/RAP1A/APRT/ACO2/CITED2/RPSA/ECHS1/SCG5/PSMD8/RPS2/TOM1/RPS23/SPINK1/RPL37A/PRDM1/MVP/RPL31/COX7C/SNHG3/APOE/RPS27/RPS17/RPL36A/RCAN2/RACK1/PPIF/GUK1/TXN/UQCRB/IGFBP6/ARHGDIA/HSP90AB1/CLTB/TUBB2A/EIF3G/RPL37/ATP5ME/CYP2J2/COX17/S100A9/PIK3R3/RPL38/RPS21/RPL30/SURF1/NOL7/CCDC85B/KYNU/TXNL4A/NR1D1/COX7A2/GPAA1/CAPNS1/TSTA3/YKT6/PFN1/UBE2M/NEU1/PPP2R1A/RPL34/STXBP2/ZNF330/HRAS/CEACAM1/NDUFA…
KEGG_TRYPTOPHAN_METABOLISM	40	0.724351	1.89095	4.9496e-05	0.000455383	0.000292032	5109	tags=57%, list=12%, signal=51%	MAOA/CYP1A1/ACAT1/ALDH2/ECHS1/CYP1B1/ALDH1B1/HADHA/OGDH/WARS1/GCDH/KYNU/HADH/ALDH9A1/CYP1A2/IDO2/ACMSD/MAOB/WARS2/TDO2/KMO/DDC/ALDH3A2
ENGELMANN_CANCER_PROGENITORS_UP	48	0.697729	1.89582	4.98461e-05	0.000457704	0.000293521	4050	tags=48%, list=9%, signal=44%	SULT1A1/CYP1A1/PDCD4/CD55/RRS1/ANXA9/PDPK1/RASD1/LURAP1L/LACTB/MYO5A/LMCD1/ABCG2/SLC2A6/BYSL/BZW2/BASP1/FHL2/IRX3/GSTM3/THBD/ELOVL5/GEM
REACTOME_COPI_MEDIATED_ANTEROGRADE_TRANSPORT	100	0.579399	1.77924	5.03727e-05	0.000461635	0.000296041	5866	tags=45%, list=13%, signal=39%	NAPA/TUBA4A/CD55/SPTBN2/FOLR1/RAB1B/CD59/TMED3/SPTB/DCTN3/SPTBN5/TUBB2A/COPE/COG2/NSF/ACTR1A/TMEM115/YKT6/CAPZB/ARF4/ARF3/TUBB8/GOSR2/COG1/ARF1/ACTR10/USO1/COPG1/DYNLL1/KDELR1/DCTN4/TUBA3E/RAB1A/GBF1/GORASP1/TUBB4A/DCTN2/NAPG/CAPZA1/COG5/STX5/DYNC1LI1/TMED7/COPZ1/TMED2
RICKMAN_TUMOR_DIFFERENTIATED_WELL_VS_POORLY_DN	375	0.432312	1.51316	5.16905e-05	0.000472787	0.000303193	5297	tags=38%, list=12%, signal=33%	CDKN1A/CPEB4/GNAI1/TUBA4A/ATP6V0D1/NT5E/IMPDH1/DESI1/FST/SH3BGRL3/TOM1/PLBD2/ABCA12/PRDM1/MRPL4/HMOX2/CALM1/SLC27A4/LINC02762/ATP6V0E1/ARRDC4/USB1/GM2A/GIPC1/PLEKHB2/CDC37/AP1M2/GAS2L1/CLCA2/EVI5L/ABHD6/IGFBP6/MYO5A/SLC31A2/ALS2CL/TTC39B/SMIM12/CDC37L1/TXNDC17/ZNF750/CRYBG2/VLDLR/MSRB1/DUSP14/IVL/DAPK3/MCOLN1/BAK1/ZDHHC3/SLC35F6/KLHL18/EHD1/TEX2/ELOF1/NR1D1/ORMDL2/IFFO2/ARL8B/C1orf116/YKT6/FAM83A…
GOLDRATH_HOMEOSTATIC_PROLIFERATION	146	0.537583	1.74057	5.37765e-05	0.000490907	0.000314814	4284	tags=37%, list=10%, signal=33%	TMX2/CD55/KLF9/ATP6V0B/MRPS25/GPX1/NOP16/PCCB/CYCS/EBF3/VDAC2/MICOS10/PRKCA/HSPE1/RAB5IF/PPA1/NME1/ATP5PF/NIFK/PDCD2/RAB5C/MMUT/PARK7/QDPR/AMZ2/MRPS33/NDUFB3/NHP2/CACYBP/NDUFAB1/ITFG1/SDHC/NPM3/BYSL/BZW2/C9orf85/VTI1B/UBL5/MPC2/IRAK1/LAGE3/NDUFB2/NACC2/EIF3J/CMBL/EID1/PSMC6/SEC62/PSMC5/IPO7/ITGB1BP1/TIMM22/AK6/TRNT1
MOOTHA_TCA	16	0.86057	1.93639	5.54241e-05	0.000504963	0.000323827	2582	tags=88%, list=6%, signal=82%	ACO2/IDH3A/FH/SUCLG1/SDHB/MDH2/SDHA/OGDH/CS/SDHD/SDHC/SUCLA2/IDH3G/IDH3B
KEGG_AMINOACYL_TRNA_BIOSYNTHESIS	41	0.724812	1.91293	5.59462e-05	0.00050873	0.000326243	5074	tags=63%, list=12%, signal=56%	MARS2/IARS2/VARS1/SARS1/YARS1/KARS1/FARSA/GARS1/MARS1/WARS1/FARSB/EARS2/NARS1/CARS1/HARS1/IARS1/PARS2/QARS1/LARS2/MTFMT/EPRS1/RARS1/WARS2/CARS2/NARS2/TARS1
GUO_HEX_TARGETS_UP	75	-0.6076	-1.85361	5.85654e-05	0.000531515	0.000340855	3913	tags=48%, list=9%, signal=44%	ZNF322/CALM3/LUC7L2/MTF2/TBL1X/ERF/RRAGD/EPHA4/WDR26/POU2F1/EFNA2/SP1/IMPAD1/SMARCC1/ENY2/REST/MAGEL2/ZFHX3/NNAT/ABCD4/FGD1/SATB1/WWTR1/CIC/SOX11/PCM1/VEGFA/CD99/PGF/PTEN/TES/WWC2/FZD4/KDM6A/STIL/PCGF2
YAMASHITA_LIVER_CANCER_WITH_EPCAM_UP	53	0.676956	1.86403	5.90762e-05	0.000535114	0.000343163	2240	tags=53%, list=5%, signal=50%	RPS12/RPSA/RPL13A/RPL7A/RPL28/AHCY/RPS10/RPL23A/RPS4Y1/RPS24/RPLP0/RPL31/RPS3A/RPS3/RPL29/RPS27A/POLR2E/RPL35/RPS7/RPL17/TOMM20/RPL9/RPL6/RPS4X/MRPL3/FMOD/SCARB2/ABHD3
REACTOME_MITOCHONDRIAL_BIOGENESIS	94	0.600955	1.82815	5.92353e-05	0.00053552	0.000343423	6109	tags=56%, list=14%, signal=48%	ATP5F1A/CYCS/ATP5F1B/ATP5F1D/MICOS10/MT-ATP6/CALM1/ATP5PB/ATP5PF/APOOL/ATP5PD/ATP5MC3/ATP5MC1/MT-ATP8/MICOS13/PPARGC1A/HSPA9/MAPK11/MAPK12/ESRRA/TFB2M/ATP5F1E/ATP5MG/IMMT/ATP5ME/SAMM50/ATP5MF/PRKAG2/CHCHD3/ATP5PO/GLUD1/PRKAB2/TMEM11/NR1D1/CHCHD6/ATP5F1C/TWNK/PRKAG1/SSBP1/ACSS2/GLUD2/POLRMT/MTX2/DMAC2L/HDAC3/MTX1/PPARA/SIRT4/MTERF1/DNAJC11/PRKAB1/TFB1M/POLG2
NAGASHIMA_NRG1_SIGNALING_DN	55	-0.645608	-1.88784	6.37062e-05	0.000574829	0.000368632	5946	tags=47%, list=14%, signal=41%	B3GNT2/TCHH/DMXL2/RYBP/N4BP2L2/MARF1/CROCCP2/TTLL5/AKAP9/PIP5K1A/PTHLH/ETAA1/HMGCS1/RBM15/ANK3/ZNF362/SOCS2/APC/NUMA1/PGAP1/ZNF292/PDS5B/SOX2/TIA1/RALGPS2/MPZL2
IGLESIAS_E2F_TARGETS_UP	135	-0.510211	-1.69222	6.47047e-05	0.000582716	0.000373689	1953	tags=30%, list=4%, signal=28%	COL1A2/S100A10/MORF4L1/BZW1/CTSS/COL1A1/SAT1/CDC6/NFIB/ANGPTL2/SEPTIN7/EVL/COL5A2/MCM3/RBP1/NID2/CLK1/PKD2/ANXA2/COL18A1/COL3A1/ANXA3/SMC2/NFKBIA/SPARC/MCM5/SERPINH1/CDO1/CD47/SMAD1/CXCL13/COL4A1/TMEM45A/GJA1/CADM1/TUBB/CDKN1C/CRTAP/MFAP2/CNN3
STEIN_ESRRA_TARGETS_RESPONSIVE_TO_ESTROGEN_DN	40	-0.701228	-1.96022	6.48567e-05	0.000582963	0.000373848	5278	tags=72%, list=12%, signal=64%	POLE2/RAB31/PRSS23/CDC25A/ASPH/GINS2/FEN1/WDHD1/CAP2/ZWILCH/CCNE2/ULK1/GINS3/RRM1/CDC6/DTL/MANEA/MCM2/MCM10/MYOF/NEMP1/ATAD2/MCM6/SMC4/CENPU/MCM5/NCAPG2/TMPO/SKP2
REACTOME_TRANSPORT_OF_MATURE_TRANSCRIPT_TO_CYTOPLASM	84	-0.58051	-1.81899	6.55994e-05	0.000588509	0.000377405	6674	tags=46%, list=15%, signal=39%	RNPS1/SRSF3/NUP35/POM121/SLBP/SRSF7/AAAS/CDC40/DHX38/NUP93/THOC2/POM121C/ALYREF/NUP85/RBM8A/DDX39B/NUP37/NXF1/WDR33/SRSF2/NUP160/SRSF5/NUP58/SRRM1/CHTOP/SRSF11/SRSF1/SRSF6/SRSF4/THOC1/NUP54/ZC3H11A/NUP153/NUP62/THOC6/TPR/NUP107/NUP210/NDC1
BROWNE_HCMV_INFECTION_18HR_UP	173	-0.485293	-1.67019	6.68221e-05	0.00059719	0.000382972	5683	tags=39%, list=13%, signal=34%	ETV5/NEK4/ZNF230/BHLHE40/TGDS/MTHFD2/ZHX2/CDC27/THOC2/NF1/PEX11A/CDC5L/KHDC4/ZNF536/MAN2A2/CD83/ZNF821/MED13/ERF/NCF2/PCGF3/LYN/RSBN1/AGO2/PTHLH/COIL/PPP1R26/CASP6/RO60/ZW10/RIF1/FGFR1OP/PDIA4/FGF9/CXADR/MORC3/ABCC5/SLC1A4/MET/TP53BP2/FANCL/ZNF473/ZFX/PARP2/FNBP1L/RFC5/MPHOSPH9/ZFP37/CASP2/CREBZF/PKIA/TOPBP1/GPRC5B/FAM168A/HLTF/MCM3/SERPINB8/RAB27A/BAZ1A/ATF2/ZWINT/LAMA5/NFKBIA/CDO1/CDK2/CXCL8/TM…
REACTOME_SIGNALING_BY_PDGF	58	-0.635407	-1.86685	6.66997e-05	0.00059719	0.000382972	5555	tags=55%, list=13%, signal=48%	STAT6/NCK2/PDGFRA/RASA1/THBS3/PIK3R1/COL9A1/STAT3/COL4A3/COL4A4/BCAR1/CRKL/RAPGEF1/PDGFD/PDGFC/GRB7/COL5A1/PLCG1/SOS1/KRAS/NRAS/PDGFB/PTPN12/COL5A2/SRC/PIK3CB/COL3A1/COL2A1/COL4A2/COL4A1/PDGFA/COL9A2
WELCSH_BRCA1_TARGETS_DN	141	0.54366	1.7481	6.73023e-05	0.000600336	0.000384989	4705	tags=45%, list=11%, signal=40%	ATIC/DANCR/VDAC1/SCAP/AIMP2/TRAP1/CYC1/DDT/PKN1/BOP1/MRPS12/NSDHL/GCSH/CLTA/SRM/PABPC4/KAT2A/FARSA/CDC37/ALG3/PRKACA/HK1/PSMD1/SLC1A5/PMPCA/SCRIB/EIF3E/HSF1/NARS1/BYSL/CCDC85B/EIF3B/FASN/CCND1/EMG1/EIF2B2/PIEZO1/MLEC/RABEPK/CTPS1/SSBP1/DHCR24/HRAS/DNAJC7/CCNE1/HSPA1B/MGST1/PDCD11/ANXA11/RASSF7/NOLC1/CHD4/SLC19A1/MTHFD1/FDFT1/EIF4H/SLC29A1/RARS1/CDC123/AP3D1/NPIPB3/POLRMT/RRP1B
SCHLOSSER_MYC_AND_SERUM_RESPONSE_SYNERGY	32	0.747196	1.868	6.85869e-05	0.000610632	0.000391592	4714	tags=69%, list=11%, signal=61%	MRPS12/MRPL12/TOMM40/SRM/FARSA/NDUFS5/SCAMP3/COG2/CCDC85B/LIMK2/FRAT2/TMEM183A/POLR2I/SEPTIN11/RNF126/FPGS/NCLN/ARMC6/SMG7/DDX28/EIF4A1/SGTA
MORI_EMU_MYC_LYMPHOMA_BY_ONSET_TIME_UP	111	-0.545158	-1.76407	6.90448e-05	0.000613543	0.000393458	4732	tags=48%, list=11%, signal=43%	MUTYH/SMC1A/MYB/LIG1/FAAP24/SMARCB1/AKT3/CEP89/RBMXL1/SSRP1/SMPD4/LLGL1/MDM1/GINS2/FANCM/PRIM2/TRAF4/ZNF428/WDHD1/SUMO2/CPLX2/RNF2/BCAT1/SRSF2/CBLL1/MMS22L/CENPN/DCK/LSM6/TRAF5/MCM7/RFC3/DAB2IP/CENPO/SUZ12/IGF2BP3/UHRF1/ILF3/TCF3/TOPBP1/TRIB2/PCLAF/RAI1/MIS18BP1/PLEKHA2/SPAG5/ZBED3/SAPCD2/CDK1/CDCA4/CBX1/KIF18B/BUB1B
NATSUME_RESPONSE_TO_INTERFERON_BETA_DN	50	0.684158	1.87978	6.98433e-05	0.000619463	0.000397255	2958	tags=50%, list=7%, signal=47%	FTL/GAS6/VDR/PRDX1/RPLP1/RPS2/GSTP1/SOD1/COX6A1/PRDX6/COX6C/COX4I1/TXN/IGFBP6/NDUFB3/CD63/BAG1/SLIRP/SKP1/PIN1/FTH1/CD70/GSTO1/TRAF3/CAPN1
BROWN_MYELOID_CELL_DEVELOPMENT_UP	154	0.525405	1.70362	7.62377e-05	0.000674898	0.000432805	4543	tags=31%, list=10%, signal=28%	NQO1/GLRX/G6PD/ATP6V1E1/DSTN/TGFBI/DGAT2/EDIL3/RPL13/CNDP2/LCN2/NEAT1/VSIR/RPS17/ANXA4/ATP6V1B2/HEBP1/RACK1/CCR1/MAPK3/ITGB2/SLC31A2/GRN/CAP1/MSRB1/PGD/CCND2/GYG1/SCARB2/RPE/GRINA/GNS/PSTPIP2/TECPR1/MXD1/STOM/CEACAM1/CSTA/PLK3/CNN2/SLC6A6/C9orf16/GSN/C2/EREG/KLHDC4/LILRB4/TREM2
NUTT_GBM_VS_AO_GLIOMA_DN	46	0.693332	1.87295	7.67095e-05	0.000677794	0.000434662	3757	tags=54%, list=9%, signal=50%	RPL4/AIMP2/TMEM97/RPS6/RPL23A/PDHX/VDAC2/RPS13/ELMO1/POLR2F/RPL27A/YIF1A/NCAM1/PPIF/UQCRB/RPS20/RPL24/RPLP2/EIF3E/RPL30/CRY2/HIP1R/EIF3F/PRPF6/GATD3A
DING_LUNG_CANCER_MUTATED_SIGNIFICANTLY	26	-0.770018	-1.9696	7.70616e-05	0.000679622	0.000435835	6002	tags=69%, list=14%, signal=60%	PDGFRA/EPHA5/FGFR4/NF1/GNAS/RB1/LTK/SLC38A3/EGFR/APC/KRAS/ATM/NRAS/INHBA/PTPRD/CDKN2A/EPHA3/KDR
REACTOME_DETOXIFICATION_OF_REACTIVE_OXYGEN_SPECIES	36	0.724917	1.85407	8.11466e-05	0.000714303	0.000458075	1925	tags=43%, list=4%, signal=41%	TXNRD1/PRDX1/GPX1/GPX2/GSR/CYCS/GSTP1/SOD1/TXNRD2/PRDX6/TXN2/TXN/PRDX3/ATOX1/PRDX5/PRDX2
QI_HYPOXIA	132	-0.509643	-1.68893	8.1725e-05	0.000718046	0.000460475	2206	tags=33%, list=5%, signal=31%	IGFBP3/ESPN/KRT19/PFKL/STC1/FZD1/ALDOA/INSIG1/ZBTB8B/TRIOBP/GBE1/CA9/MT1X/FAM117B/DIXDC1/PFKP/VHL/PKP2/REEP1/IER3/CDHR1/VEGFA/PGF/PPP1R3B/PGM1/PLOD1/SLC2A1/PCYT1B/ALDOC/PLEKHA2/CAPN5/SLC41A2/HES6/EFNA1/P4HA1/COL12A1/EGLN3/PDK1/SCD/EGLN1/NDRG1/PLOD2/LOX
TIEN_INTESTINE_PROBIOTICS_2HR_DN	89	-0.556952	-1.75142	8.28977e-05	0.000726985	0.000466208	4692	tags=45%, list=11%, signal=40%	RAF1/PLXNA1/GEMIN2/HIC2/OPA1/ZNF512B/CIRBP/CKAP4/RDH11/E2F8/BRD8/FNDC3B/PTGS2/TAF1A/RAPGEF2/UBE2D1/SEC23A/RECQL/HAUS3/PPP4R1/KLHL7/SOS1/HSPA13/EFCAB2/GINS3/DKK3/WWTR1/FERMT2/CRIM1/PRCP/QKI/DBN1/PHIP/GGH/TCAF1/BAZ1A/CEBPD/JMJD1C/CADM1/INPP5F
MISSIAGLIA_REGULATED_BY_METHYLATION_UP	121	0.549241	1.73273	8.54941e-05	0.000748353	0.000479911	4428	tags=40%, list=10%, signal=36%	CDKN1A/H2AC6/CD55/H2BC12/PSAP/MAP1LC3B/ACSS1/LCN2/TMEM59/ATP6V0E1/RRBP1/STAT1/MX2/CD9/SCAMP2/TNFAIP2/SQSTM1/ST3GAL5/MXD4/ATOX1/MYRIP/GRN/POLD4/QPRT/HYAL1/SPINT1/PRDX5/ATP6V1G1/DNAJB2/MAP2K3/TAP1/YPEL5/SDC4/ARF4/NEU1/TFPI2/UBE2H/ISG15/S100P/BLZF1/BECN1/RAB9A/AREG/IFIT1/IFNGR1/GSN/PRSS8/CDC123/BST2
REACTOME_CELL_JUNCTION_ORGANIZATION	90	-0.562847	-1.75793	8.61367e-05	0.000752571	0.000482616	4724	tags=42%, list=11%, signal=38%	LIMS1/CDH12/CLDN12/MPP5/ACTG1/ITGB4/PARVA/CLDN10/ACTB/ILK/CTNND1/CLDN4/CLDN1/PRKCI/AFDN/ITGA6/FBLIM1/ANG/CLDN18/NECTIN1/FERMT2/SDK1/LAMC2/CDH1/CDH24/PXN/NECTIN3/CLDN5/LAMA3/CDH3/FLNA/CDH7/CDH4/CDH10/CLDN3/CADM1/FLNC/CDH2
LEE_LIVER_CANCER_SURVIVAL_DN	177	-0.468304	-1.61482	8.66313e-05	0.000755483	0.000484483	3062	tags=36%, list=7%, signal=33%	WDR34/HDAC2/SUMO2/BCAT1/RND3/ZWILCH/RMI2/SET/HMGN1/KRT19/UBE2D1/AGRN/FABP5/INAVA/MARCKS/ZADH2/PLP2/MCM7/RBM17/MSH6/CCNB1/SUZ12/PELI1/PBX1/SPC25/SEPTIN7/RAB32/LXN/DEPDC1/MCM2/DSG2/KHDRBS1/ECT2/TOPBP1/IER3/UBE2T/NLRP2/PDLIM7/TES/PCLAF/ATAD2/MCM6/ANXA3/KLF5/ZNF532/TMSB4X/CENPU/TTK/PTMA/KNTC1/SMC2/CDCA8/USP1/CENPF/SERPINH1/ANLN/DLGAP5/CCNA2/DEK/TUBA1B/SLC44A1/HMGB2/NDC1
REACTOME_DNA_DOUBLE_STRAND_BREAK_REPAIR	165	-0.486277	-1.66192	8.7201e-05	0.000759037	0.000486763	4490	tags=38%, list=10%, signal=34%	ABRAXAS1/PPP4R2/WRN/RNF8/POLK/LIG3/UBE2I/TOP3A/NBN/XRCC5/DCLRE1C/RAD9B/FEN1/MRE11/SUMO2/EXO1/RAD51D/MAPK8/XRCC4/ABL1/RIF1/RMI2/POLD1/RFC1/POLM/BAZ1B/RAD51/PAXIP1/PARP1/TDP1/RFC3/CLSPN/BRCA2/XRCC3/RNF168/UBC/RHNO1/KPNA2/PARP2/BRCA1/DNA2/RFC5/EYA1/ATM/POLQ/XRCC2/POLD3/EME1/TP53BP1/BLM/GEN1/TOPBP1/RAD51AP1/POLE/RFC4/H2AX/BRIP1/TIMELESS/CHEK1/CDK2/BARD1/CCNA2/NSD2
WANG_MLL_TARGETS	291	-0.418449	-1.53217	8.85888e-05	0.000769687	0.000493592	5856	tags=34%, list=13%, signal=30%	CYP2S1/CYS1/FAM20A/SMOC2/CISH/GATA3/ARHGAP18/WFDC21P/MRC2/CALHM5/ARID5B/GLT8D2/GDA/ASB15/EGR3/FOXD1/CPQ/PAX6/PLEK2/MST1R/DEF6/VEGFC/PCDHB7/GPM6B/NFATC4/DPYD/B4GALNT4/B3GALT4/RTN4RL1/DGKA/NR4A2/UGP2/AVPR1A/PITX2/CACNA1A/PTHLH/ABI3BP/RNF130/TGFBR3/STOX2/SFRP1/SCARF2/NEGR1/NFIA/NDNF/LARP6/SELENOP/IL6/SH3RF2/TBC1D8/RPS6KA6/DLL1/FBN2/KCNJ15/LGALS3BP/RSPO2/TOX/ENPEP/DKK3/MMP14/APOBEC3B/IGF2BP3/FRMD5/CN…
KERLEY_RESPONSE_TO_CISPLATIN_UP	44	0.70306	1.87534	8.96798e-05	0.000777723	0.000498746	4399	tags=61%, list=10%, signal=55%	TNFRSF10C/INPP5D/CDKN1A/RPS27L/ZMAT3/ACTA2/FDXR/GDF15/EPS8L2/FAS/ALDH1A3/PHLDA3/SESN1/ANXA4/FADS3/DDB2/TRIM22/GLS2/PPM1D/PLK3/PDE4A/TP53TG1/PIDD1/NEFL/STK17A/DDIT4/TIGAR
REACTOME_METABOLIC_DISORDERS_OF_BIOLOGICAL_OXIDATION_ENZYMES	33	0.745626	1.87768	9.01573e-05	0.000780419	0.000500475	4910	tags=53%, list=11%, signal=47%	MAOA/FDXR/AHCY/CYP1B1/FDX2/ACY1/GCLC/TPMT/CYP24A1/GSS/GGT1/UGT1A1/FMO3/FDX1/CYP2R1/CYP17A1/CYP27A1/GCLM
BHATI_G2M_ARREST_BY_2METHOXYESTRADIOL_UP	120	-0.531903	-1.73691	9.1057e-05	0.000786752	0.000504536	4356	tags=39%, list=10%, signal=35%	BMS1P1/FAM215B/DKK1/UBR7/PNN/PTBP2/SNRPA1/ANKK1/TEP1/IFNLR1/FGFR1OP/PDGFC/POLR2A/CDC20/LSM6/CORO1C/CCNB1/AURKA/CDC6/GALNT3/NRAS/WWTR1/SPC25/MAD2L1/NEK2/NUF2/GMNN/PPP1R12B/PURB/PBK/EGR1/ATL3/IER3/NLRP2/MED17/PHIP/MYBL2/RAB27A/SPARC/ZSCAN30/PIF1/BUB1/TACSTD2/DLGAP5/NDC1/ASPM/ANXA1
IWANAGA_CARCINOGENESIS_BY_KRAS_PTEN_DN	345	-0.400954	-1.48109	9.58122e-05	0.000826314	0.000529907	3773	tags=26%, list=9%, signal=24%	MCAM/GTF2I/LIG3/SCAF4/TNNT2/RAMP2/SERPING1/ADRB1/INTS2/NID1/ERF/EFNB2/PRPF4B/STON2/ZCCHC14/CDON/CACNA1A/FOXF2/ZBTB14/FA2H/HNRNPF/ZNF672/XPR1/ATP10D/SET/HIP1/HOXA3/TTC6/DAAM1/TMEM184B/PPP2R5B/ELF4/ITGB3BP/PAXIP1/NEK11/CAV2/MARCKS/PLCG1/ARID4B/HAUS3/TMEM170A/ARHGEF2/ZMAT4/OTUD3/RCN1/CDT1/BRCA1/DDHD2/SATB1/CTDSPL2/ANGPTL2/HNRNPU/TRA2A/MMP2/SREK1/GALNT13/CHSY1/WASF2/TMEM263/TPM1/GEN1/GNB4/TTC21B/ADGR…
ONDER_CDH1_TARGETS_2_UP	254	-0.430743	-1.54126	9.7851e-05	0.000842346	0.000540188	4058	tags=33%, list=9%, signal=30%	ANXA6/RECK/DOCK10/ZNF22/RGS17/TAGLN/SDC3/KAT2B/NID1/TBL1X/MLLT3/PPARG/STC2/FBN1/TRAK2/SV2A/NR2F1/TGFBR3/MARCHF3/CCNE2/RGS4/ITGA10/COL5A1/IGFBP3/CDK5RAP2/SHROOM2/COL1A2/FBLN5/MARCKS/RHOBTB1/SIX2/COL1A1/TOX/MYBL1/IL17RC/ARHGEF40/FERMT2/CDKN2C/MMP2/DNAJB4/AGTR1/RIMS1/PCDH9/GSTA4/TPM1/LPAR1/CYFIP2/SLITRK5/FZD2/COL5A2/SYT11/TAF9B/ENPP1/NAP1L3/NID2/RNASE4/NAV2/MOXD1/COL3A1/NECTIN3/SDC2/LIN7A/FAT4/SPARC…
LANDIS_ERBB2_BREAST_TUMORS_324_DN	150	0.527567	1.71044	9.87847e-05	0.000848824	0.000544342	3484	tags=35%, list=8%, signal=32%	PAPSS2/CHCHD10/CYP4B1/GNAI1/SULT1A1/GAS6/ACTA2/CPT2/NDUFV1/TMEM205/ETFB/MCCC1/TGFBI/CFP/GPAM/ZNF703/UQCR10/CYB5A/HADHB/ACAA1/RRAGC/BCAT2/ATP1B3/NDUFS5/IDH1/MMUT/CD151/SCP2/IGFBP6/DECR1/PDHA1/ALDH1A1/BCKDHB/APLP2/EPHX2/NKIRAS1/NDUFAB1/ALAD/GYG1/CDC34/CAVIN2/PHYH/PPP2R5A/HADH/PLAC8/ST3GAL6/ACSL1/MOCS2/YWHAG/TSC22D1/DNAJC8/THBD
OLSSON_E2F3_TARGETS_DN	38	-0.707764	-1.96279	0.000101377	0.000869503	0.000557603	3289	tags=53%, list=8%, signal=49%	IGF2/LPL/CAV2/MT1F/MT1X/PLK1/MAD2L1/NUCKS1/NAPA-AS1/RRM2/LBR/INHBA/MYBL2/PTMA/NFKBIA/CDK1/CXCL1/PTTG1/TPX2/VIM
TURASHVILI_BREAST_DUCTAL_CARCINOMA_VS_DUCTAL_NORMAL_UP	46	-0.671369	-1.91343	0.000101695	0.000870638	0.000558331	2051	tags=35%, list=5%, signal=33%	FBN1/UBE2D1/COL1A2/COL1A1/DDX60/DTL/COL5A2/TRIM59/COL3A1/SGO2/COL11A1/DCLK1/CENPF/COL4A1/TOP2A/VCAN
COLLER_MYC_TARGETS_UP	24	0.782646	1.88224	0.000102041	0.000872007	0.000559209	4128	tags=62%, list=9%, signal=57%	GRPEL1/HSPD1/EIF5A/C1QBP/AHCY/TRAP1/PPIF/CCND2/IARS1/ASS1/CKS2/CEBPZ/NAMPT/FBL/TFRC
PICCALUGA_ANGIOIMMUNOBLASTIC_LYMPHOMA_UP	207	-0.448906	-1.58539	0.000105775	0.000902268	0.000578615	4855	tags=37%, list=11%, signal=33%	IGFBP5/WDFY3/CCL2/RARRES2/FLRT2/SPRED1/TCIM/CMKLR1/CYP26B1/PARVA/TMEM176B/YAP1/TMEM176A/TAGLN/SERPING1/LAMB1/FBN1/KCNJ10/TANC1/FAM114A1/ARHGEF10/ABI3BP/RGS5/RND3/TNC/ITPRIPL2/RBP5/CAV2/CTTNBP2NL/OSMR/LOXL1/ABCC3/GUCY1B1/COL1A2/IL33/MARCKS/CTHRC1/COL1A1/RBPMS/NFIB/WWTR1/FERMT2/LAMC1/CAVIN1/TPM1/LPAR1/SEPTIN10/GPRC5B/ADGRL4/PGF/C1R/PDPN/CCN4/CFH/COL3A1/MXRA5/COL4A2/CSRP2/DCLK1/SPARC/ADAMTS1/SERPINH…
VART_KSHV_INFECTION_ANGIOGENIC_MARKERS_DN	131	-0.506621	-1.67917	0.000106107	0.000903456	0.000579376	6472	tags=41%, list=15%, signal=35%	ANPEP/MMP19/CXCL5/PDGFRA/EPHA5/HGF/KLK3/PROK2/EPHB2/CFHR3/FGFR4/TNFRSF12A/CCL2/PRSS23/FRS2/DLL3/RAMP2/PTN/ANGPTL4/NRP2/EPHA4/DVL3/SFRP1/CHGA/GRB14/PDGFC/FZD8/FZD1/FLT4/EPHA2/DLL1/EFNA5/ANG/DIXDC1/MMP2/EPHB4/WNT7B/MDK/NPPB/FZD2/FGF2/VEGFA/PTEN/CFH/LAMA5/FGFR2/EPHA3/TYMP/CXCL1/NOTCH3/FGFR3/CXCL8/FZD7/FRZB
KEGG_METABOLISM_OF_XENOBIOTICS_BY_CYTOCHROME_P450	69	0.629362	1.82885	0.000106367	0.000904023	0.00057974	6064	tags=42%, list=14%, signal=36%	AKR1C2/AKR1C1/CYP1A1/ALDH1A3/GSTA2/CYP1B1/UGT2B11/GSTP1/EPHX1/AKR1C3/UGT1A3/GSTM4/CYP2B6/MGST3/GSTO1/UGT1A1/ADH1C/CYP1A2/GSTM3/MGST1/UGT1A6/ALDH3B1/GSTA1/GSTK1/CYP2C8/AKR1C4/CYP2C9/UGT1A5/GSTM2
PELLICCIOTTA_HDAC_IN_ANTIGEN_PRESENTATION_UP	64	0.643771	1.8323	0.000106748	0.000905622	0.000580766	4785	tags=53%, list=11%, signal=47%	ERGIC1/TRAPPC1/BCAP31/YIPF1/PSMD1/HSPA5/PSMD9/POMP/PSMC4/COPE/PSMD2/DDIT3/PSMB4/PSMD13/PSMB1/PSMA5/PSMD4/TRAPPC6A/PSMB7/SIL1/PSMD6/PSMB3/TRAPPC3/GOSR2/TRAPPC4/COPG1/CALR/TBCB/WFS1/PSMD3/SAR1B/ERGIC3/HERPUD1/SELENOS
BOYAULT_LIVER_CANCER_SUBCLASS_G123_UP	47	-0.669136	-1.91508	0.000107003	0.000906143	0.0005811	3351	tags=45%, list=8%, signal=41%	POGK/CKAP4/ENAH/PRKCI/CPSF6/FABP5/KPNA2/GINS1/SUCO/SGCE/RFC4/ATAD2/SMC4/KIF20A/CCNB2/CD24/BARD1/NT5DC2/TMPO/CBX1/PLCB1
GRAHAM_CML_QUIESCENT_VS_NORMAL_QUIESCENT_UP	93	-0.559296	-1.77621	0.000107221	0.000906349	0.000581232	2338	tags=33%, list=5%, signal=32%	CDC20/NUDT4/MYH10/APOBEC3B/GINS1/TPM1/RRM2/PDLIM1/SERPINB2/EZH2/RACGAP1/PCLAF/BAZ1A/CENPU/CEP55/H2AX/ZWINT/SMC2/CCNB2/MCM5/CENPF/CDK1/CHEK1/MELK/TK1/DLGAP5/KIF15/PRC1/NUSAP1/TOP2A/KIF11
VERHAAK_GLIOBLASTOMA_CLASSICAL	161	-0.48478	-1.65531	0.000109651	0.000925216	0.000593331	3545	tags=28%, list=8%, signal=26%	PTPN14/BTBD2/GALNT4/CLIP2/ILK/CARMIL1/SOX9/ZNF235/ZNF112/ANXA5/SLC2A10/ZNF227/DENND2A/DMWD/TGFB3/EGFR/RGS12/KIAA0355/CREB5/SOCS2/ITGB8/SPRY2/TGIF2/LFNG/TEAD3/PCSK5/ZNF45/ZNF264/EPHB4/BLM/NES/LHFPL6/TRIB2/ACSL3/TLE2/GLG1/FGFR3/CDH4/FZD7/GJA1/FBXO17/PDGFA/SMO/SLC4A4/CDH2
REACTOME_MITOCHONDRIAL_FATTY_ACID_BETA_OXIDATION	37	0.719497	1.85272	0.000110043	0.000926853	0.000594381	5330	tags=62%, list=12%, signal=55%	ACSM3/ECHS1/PCCB/HADHA/ACOT7/ACADM/MECR/HADHB/MMUT/ACADVL/DECR1/NDUFAB1/PCCA/ACBD6/ACSF2/ACOT2/HADH/MCEE/MCAT/THEM5/ACADL/PCTP/MMAA
LIANG_SILENCED_BY_METHYLATION_UP	33	0.7408	1.86553	0.000110795	0.000931513	0.00059737	1657	tags=36%, list=4%, signal=35%	SAA1/H2AC6/H2BC21/KRT7/ALDH1A3/MAGEA4/SCG5/H19/ASAH1/PAPPA/STAT1/CCND2
KALMA_E2F1_TARGETS	11	-0.883769	-1.81919	0.000111323	0.000932605	0.00059807	2961	tags=73%, list=7%, signal=68%	FEN1/POLA2/TYMS/POLD1/MCM2/RFC4/MCM6/TOP2A
REACTOME_RECEPTOR_TYPE_TYROSINE_PROTEIN_PHOSPHATASES	20	-0.811411	-1.95567	0.000111142	0.000932605	0.00059807	5252	tags=60%, list=12%, signal=53%	PPFIA3/SLITRK3/PTPRS/IL1RAPL2/PPFIBP2/SLITRK5/PTPRF/PTPRD/SLITRK6/PPFIBP1/PPFIA4/IL1RAP
REACTOME_BETA_CATENIN_INDEPENDENT_WNT_SIGNALING	145	0.52503	1.69653	0.000113685	0.00095069	0.000609667	5435	tags=47%, list=12%, signal=41%	PSME2/ROR1/PSMD8/AP2A1/PRKCA/CALM1/CLTA/RPS27A/PSMA7/WNT5A/AP2S1/PSME1/PSMD1/PSMB5/PSMB6/PSMD9/CLTB/PSMB10/PSMD14/SCRIB/PSMC4/PSMA6/PSMD2/PSMD7/AP2M1/PSMA3/UBA52/PSMB4/PSMD13/UBB/PSMB1/PSMA5/PSMD4/DVL1/PSMC2/PSMA4/PSMB7/PSMA2/PFN1/ITPR2/PSMD6/PSMB3/LEF1/CLTC/PSME3/WNT4/PSMC3/PSMC1/WNT11/PSMB2/WNT1/PSMF1/PSMD11/PSMC6/GNG10/PSMC5/SEM1/PSMD12/PSMB8/PSMD3/GNG12/CTNNB1/PSMB9/GNG5/PARD6A/RHOA/PPP3R1/GN…
KEGG_PYRUVATE_METABOLISM	40	0.709067	1.85105	0.00011721	0.000978417	0.000627449	5109	tags=60%, list=12%, signal=53%	ACAT1/ALDH2/ME1/ALDH1B1/ACSS1/PC/HAGHL/MDH2/LDHB/GRHPR/HAGH/DLD/PDHA1/AKR1B1/PDHB/MDH1/ME3/ALDH9A1/ME2/ACSS2/ACYP2/PCK2/DLAT/ALDH3A2
STEARMAN_LUNG_CANCER_EARLY_VS_LATE_UP	126	-0.512347	-1.69659	0.000123908	0.00103249	0.000662128	5795	tags=46%, list=13%, signal=40%	NME3/SPPL3/CHD8/RASA1/ANTXR2/LIMS1/C1QTNF3/RNF6/ZSCAN26/HNRNPC/PTPRS/KIF5B/ZNF639/PNN/IREB2/KAT2B/DDX3X/SF3B1/WDR26/CTCF/PARP6/IFNAR2/APBB2/PGRMC1/KLF13/TUG1/ANK3/CCNL2/MDM4/AGPAT5/SRSF1/YTHDC1/EXT1/RCN1/NFIB/CGGBP1/CD200/C5orf34/NRAS/MED23/SLC4A5/RELL1/SMAD4/KMT2A/H2AZ2/CLK1/PTPRD/PKD2/WWC2/TIA1/TPST1/HNRNPH1/GLG1/ARHGAP21/CADM1/PDGFA/SMO/KDR
REACTOME_MAPK_FAMILY_SIGNALING_CASCADES	290	0.444749	1.53238	0.000124151	0.00103268	0.000662249	4432	tags=30%, list=10%, signal=27%	RAP1A/KITLG/PSME2/CCND3/PSMD8/ARRB1/JAK1/PAQR3/CAMK2G/FOXO1/CALM1/SPTBN2/PHB/TGFA/RPS27A/PSMA7/YWHAB/NCAM1/KSR2/MAPK3/PSME1/PRKACA/RASGRF1/PSMD1/PSMB5/MAP2K2/SPTB/PSMB6/LAMTOR3/PEBP1/PSMD9/SPTBN5/RASGRF2/PSMB10/PSMD14/PSMC4/SPRED3/GRB2/PSMA6/PSMD2/PSMD7/JAK2/PSMA3/UBA52/PSMB4/PSMD13/UBB/PSMB1/PSMA5/PSMD4/ETV4/PSMC2/PSMA4/PSMB7/PSMA2/PPP2R5A/IRS2/PSMD6/PSMB3/EGF/MARK3/PPP2R1A/CUL3/CDC42EP3/PSME3/P…
DOANE_BREAST_CANCER_CLASSES_DN	33	-0.71292	-1.91336	0.00012488	0.0010369	0.000664953	3242	tags=48%, list=7%, signal=45%	SLC16A1/WDR33/EHBP1/ARTN/MARCHF3/PAPSS1/WWTR1/PLAUR/LMO4/CTSV/ANP32E/DEK/FOXC1/DSC2/PLOD2/SMO
LUI_TARGETS_OF_PAX8_PPARG_FUSION	34	0.738942	1.86673	0.000126627	0.00104955	0.000673062	4811	tags=68%, list=11%, signal=60%	RPS5/RPS12/ATP5F1A/UQCR11/RPS2/RPL18/RPL18A/SARS1/TMEM147/EIF3K/HSPA8/RPL17/HSP90AB1/LITAF/EIF3G/DNAJA1/SKP1/SDC4/RPL21/ATXN10/FBL/ERGIC3/CLDN7
REACTOME_SUMOYLATION_OF_CHROMATIN_ORGANIZATION_PROTEINS	70	-0.589973	-1.77486	0.000127256	0.0010529	0.000675212	3669	tags=36%, list=8%, signal=33%	UBE2I/NUP85/PHC2/HDAC2/NUP37/SUMO2/RNF2/NUP160/NUP58/PHC3/ZBED1/CHD3/SUZ12/SATB1/NUP54/NUP153/NUP62/CBX5/TPR/NUP107/SUMO3/PCGF2/PHC1/NUP210/NDC1
IVANOVA_HEMATOPOIESIS_STEM_CELL	186	-0.458131	-1.58849	0.00012858	0.00106197	0.000681033	5759	tags=37%, list=13%, signal=32%	TSPAN13/ASH1L/PEAK1/ZBTB37/GATA3/PAIP1/IFI44/PPP1R9A/PEX11A/SOCS5/LRRTM4/PALMD/CPXM1/SCAF11/AGXT/IFT81/NCOA2/ARHGAP32/NR4A2/TRIM9/ZC2HC1A/PRKACB/PRKG1/ITIH5/SV2A/CCAR1/PDE4B/SEMA4C/JADE1/LYPD1/POLR2A/ZBTB20/TGOLN2/ZC3H12C/HOOK1/SKIL/IFIH1/REST/MAFF/SOS1/SMC5/NSD3/DNAJB13/TCF4/RBBP6/TSPAN6/SREK1/TCTN2/CHRNB1/EGR1/SYT11/SERPINB8/PKD2/NFIX/COL18A1/ETV1/HNRNPR/LAPTM4B/WWC2/NRXN3/PITPNC1/NFKBIA/DNMT3A…
KEGG_GLUTATHIONE_METABOLISM	48	0.678293	1.84301	0.000129231	0.00106547	0.000683275	3389	tags=47%, list=8%, signal=43%	RRM2B/G6PD/GSTA2/GPX1/GPX2/GSR/GSTP1/GGT5/GPX4/LAP3/SRM/GCLC/IDH1/GSTM4/GGT7/PGD/GGCT/GSS/GGT1/MGST3/GSTO1/GSTM3/MGST1
HOLLEMAN_ASPARAGINASE_RESISTANCE_B_ALL_UP	28	0.778111	1.91101	0.000129764	0.00106799	0.000684888	4098	tags=71%, list=9%, signal=65%	RPS5/RPL4/RPL13A/RPL7A/RPL3/EEF1G/EIF3K/RPLP0/RPL11/RPS3/RPL5/RACK1/EIF3L/EEF1B2/RPL6/NOP53/CCDC69/EIF3D/FBL/LPCAT1
HOSHIDA_LIVER_CANCER_SURVIVAL_DN	112	0.547172	1.70626	0.000131756	0.00108248	0.000694183	5147	tags=40%, list=12%, signal=36%	PON3/SC5D/PLAAT3/ACSM3/C4BPB/SCG5/TMEM97/SUCLG1/ATP5F1D/CYB5A/HSPE1/TXN2/TM7SF2/PMM1/NAAA/BAIAP2/CCT8/HMGCL/SDHC/ACOT2/EIF2B1/CYP2B6/PCYT2/DCAF11/RPS6KA5/ALDH9A1/ARF4/PSMB3/MPC2/ATP6AP2/AKR1D1/DAD1/ANKRD46/ZNF185/CTBS/TIMM8A/ITPRID2/GGCX/USP14/TDO2/ZER1/POLRMT/EMD/NARS2/ERCC5
JOSEPH_RESPONSE_TO_SODIUM_BUTYRATE_UP	31	0.749099	1.85934	0.000138087	0.0011325	0.000726263	3051	tags=48%, list=7%, signal=45%	IFI30/PRDX1/PSAP/GSTP1/COX6A1/UQCRQ/HADHB/NME2/ATP5MC3/POLR2L/GPRC5A/MT2A/CD82/S100P/PCMT1
CHARAFE_BREAST_CANCER_LUMINAL_VS_BASAL_DN	454	-0.371649	-1.40224	0.000138691	0.00113547	0.000728165	4086	tags=30%, list=9%, signal=28%	GNAL/MYO1B/HLA-E/DPYD/YAP1/FAM171A1/LY6K/SLC49A4/MBNL1/ZBTB38/CCDC82/ITGA1/DGKA/SNX7/SLC16A1/LOXL2/LIPG/RBMS3/SOAT1/LYN/SLC9A6/KRT17/DSC3/ERAP2/IL1A/CFLAR/FNDC3B/PKN2/SFRP1/RND3/PTGS2/EHBP1/DCBLD2/ATP10D/HOXA3/PDGFC/SH3KBP1/LARP6/ZC3H12C/EGFR/GNA15/CAV2/CFI/OSMR/ELK3/SFN/NAB1/BTN3A2/ITGA6/EPHA2/ADRB2/CORO1C/ITGB8/PGM2/MET/RBMS1/CLIC4/PPP4R1/MT1F/SPRY2/MT1X/MPZL1/FBLIM1/PRKD3/EXT1/CYB5R3/RBFOX2/AD…
REACTOME_MITOCHONDRIAL_CALCIUM_ION_TRANSPORT	23	0.794599	1.90589	0.000139956	0.00114383	0.000733524	3988	tags=65%, list=9%, signal=59%	VDAC1/VDAC2/AKAP1/PHB/SMDT1/MICU2/PMPCA/LETM1/PMPCB/PHB2/STOML2/PARL/AFG3L2/MAIP1/MICU1
NABA_BASEMENT_MEMBRANES	40	-0.686663	-1.9195	0.00014554	0.0011874	0.000761464	4235	tags=42%, list=10%, signal=38%	COL4A3/COL4A4/NPNT/NID1/LAMB1/NTNG1/COL4A6/AGRN/LAMC1/LAMC2/NID2/COL18A1/LAMA3/COL4A2/LAMA5/COL4A1/NTN1
REACTOME_GLUTATHIONE_CONJUGATION	35	0.735345	1.85967	0.00014788	0.00120341	0.000771733	4974	tags=56%, list=11%, signal=49%	GSTA2/GSTP1/GGT5/CNDP2/GCLC/GSTM4/GGT7/GGCT/GSS/CHAC2/GGT1/MGST3/GSTO1/GSTM3/ESD/MGST1/GSTA1/GSTT2B/GCLM/GSTK1
GAUSSMANN_MLL_AF4_FUSION_TARGETS_A_UP	192	-0.459026	-1.59671	0.000148274	0.00120341	0.000771733	6562	tags=46%, list=15%, signal=39%	ADAL/SLBP/NAV3/MOSPD2/MAU2/NRP1/ZNF467/AKAP17A/GSDME/SMOC2/CHD8/CA5B/SPDYA/PACC1/PLPP3/GDA/KAT7/GNPDA2/FLT1/CCL2/GPRIN3/C2CD3/DISP1/MND1/MYH9/NIPAL1/NR2C2/CENPE/ZNF22/ZDHHC20/LIG3/ARHGAP32/NID1/PCDH19/SORD/WAC/AP1S3/PITX2/ZNF286A/TRIM9/LYN/HDAC2/TNRC6A/TRIM2/TUBB2B/WDR33/RP2/RNF130/BRD8/DTNA/CLSTN1/RIF1/PRPF3/ANK3/SH3KBP1/SRRM2/SLC43A3/PDE8A/CPSF6/HLA-A/MATR3/APC/RPGR/RNF138/THOC1/SETD5/TNFAIP8/S…
SMID_BREAST_CANCER_LUMINAL_A_DN	18	-0.823226	-1.93604	0.000148144	0.00120341	0.000771733	3306	tags=67%, list=8%, signal=62%	VGLL1/CDC20/CENPN/MYBL2/NCAPH/CDC45/NDC80/CDCA8/CDCA3/TPX2/ANP32E/TOP2A
KEGG_SELENOAMINO_ACID_METABOLISM	26	0.778607	1.90033	0.000155518	0.00126002	0.000808037	3712	tags=56%, list=9%, signal=51%	PAPSS2/MARS2/AHCY/GGT5/AHCYL1/BUD23/MARS1/GGT7/LCMT1/AHCYL2/SCLY/GGT1/CBS/SEPHS2/CTH
LU_EZH2_TARGETS_DN	392	-0.381974	-1.42995	0.000156615	0.00126671	0.000812329	4201	tags=30%, list=10%, signal=28%	PHACTR4/GFPT1/DYNC1LI2/DKK1/RECK/TMTC4/HK2/ASPH/FKBP14/TRIM33/GLCE/SHROOM4/BACE2/MTF2/LAMB1/PRPF4B/CNTNAP1/FAM160B1/ZNF611/ZNF549/BCL9/DUSP19/SLC38A1/XIST/AMER1/RBM12/TRAPPC11/AGO2/ATP11C/WDHD1/BTAF1/ARHGEF10/ADGRG6/ZNF483/GRB14/ENAH/MTMR9/ELF4/ANKRD36C/TMX3/CLDN1/NBPF3/CXADR/EGFR/IGFBP3/ZNF682/DTWD2/FZD1/CPSF6/CREB5/OIP5/ABCC5/DMC1/CREB1/BCLAF1/FBN2/SLC16A9/DICER1/VKORC1/LRATD2/KPNA2/HNRNPUL1/RN…
REACTOME_RESOLUTION_OF_D_LOOP_STRUCTURES_THROUGH_SYNTHESIS_DEPENDENT_STRAND_ANNEALING_SDSA	26	-0.754925	-1.93099	0.000157213	0.00126936	0.000814028	5749	tags=77%, list=13%, signal=67%	RBBP8/RTEL1/WRN/TOP3A/NBN/MRE11/EXO1/RAD51D/RMI2/RAD51/BRCA2/XRCC3/BRCA1/DNA2/ATM/XRCC2/BLM/RAD51AP1/BRIP1/BARD1
REACTOME_RNA_POLYMERASE_III_CHAIN_ELONGATION	18	0.827058	1.89899	0.000159738	0.00128753	0.000825679	6149	tags=72%, list=14%, signal=62%	POLR2F/POLR3H/POLR2E/POLR2L/POLR1D/POLR1C/POLR2K/POLR3E/POLR3K/POLR3D/POLR3B/POLR3A/POLR2H
PELLICCIOTTA_HDAC_IN_ANTIGEN_PRESENTATION_DN	49	0.672716	1.84121	0.000160547	0.00129182	0.000828431	6238	tags=65%, list=14%, signal=56%	PSME2/PSMD8/PSMA7/PSME1/PSMB5/PSMB6/PSMB10/PSMD14/PSMA6/PSMD7/PSMA3/PSMC2/PSMA4/TAP1/PSMA2/PSME3/PSMC3/PSMC1/PSMB2/PSMF1/PSMD11/PSMC6/GGA3/HLA-B/PSMC5/KDELR1/PSMB8/PSMB9/SERP1/TAP2/NGLY1/TAPBPL
KORKOLA_TERATOMA	41	-0.679468	-1.90482	0.000162848	0.00130809	0.000838866	3870	tags=51%, list=9%, signal=47%	HIC2/AGR2/MBD2/FEN1/FAM72C/CDC20/CCNB1/AURKA/DNMT3B/COL14A1/NUF2/EGR1/TRIM71/NFKBIZ/MYCN/CENPA/ZWINT/MCM5/DLGAP5/TM4SF1/MFAP4
YAO_TEMPORAL_RESPONSE_TO_PROGESTERONE_CLUSTER_16	78	-0.577322	-1.77946	0.000164706	0.00132075	0.000846982	4855	tags=47%, list=11%, signal=42%	IGFBP5/BCL7C/NME4/CNN1/ANXA6/CALM3/TNNT2/NPNT/AGR2/DMPK/FBN1/HNRNPDL/COLGALT1/FABP5/COL1A2/COL1A1/FEZ2/GUSB/WDR6/TNNI2/GAPDH/GPX7/DBN1/PDLIM7/COL18A1/P3H3/COL3A1/COL4A2/SPARC/PCDH7/MEST/FADS1/COL4A1/TMEM45A/VCAN/CRTAP/MFAP2
REACTOME_HEDGEHOG_ON_STATE	86	0.590521	1.78174	0.00016768	0.0013423	0.0008608	4432	tags=52%, list=10%, signal=47%	PSME2/PSMD8/ARRB1/RPS27A/PSMA7/PSME1/PSMD1/PSMB5/PSMB6/PSMD9/PSMB10/PSMD14/PSMC4/DZIP1/PSMA6/PSMD2/PSMD7/PSMA3/UBA52/PSMB4/PSMD13/UBB/PSMB1/PSMA5/PSMD4/PSMC2/PSMA4/PSMB7/PSMA2/PSMD6/PSMB3/CUL3/PSME3/KIF3A/PSMC3/PSMC1/PSMB2/PSMF1/PSMD11/PSMC6/PSMC5/SEM1/PSMD12/PSMB8/PSMD3
FU_INTERACT_WITH_ALKBH8	13	0.872309	1.85878	0.000173141	0.00138365	0.000887318	4396	tags=77%, list=10%, signal=69%	CCT3/CCT5/CCT7/CCT6A/CCT8/TCP1/CCT4/HSP90AA1/CCT2/ECSIT
CAIRO_LIVER_DEVELOPMENT_DN	222	0.47464	1.59213	0.000173977	0.0013856	0.000888573	4008	tags=30%, list=9%, signal=27%	PON3/PROC/FAH/GLDC/PINK1/CTSH/HSD17B2/DCXR/CPS1/APOB/PSAP/CFP/TMPRSS2/TACC1/LTF/ALDH1B1/TST/SLC7A7/ETFA/ACADM/NSDHL/LCN2/APOE/LYST/GM2A/CD302/HAGH/BDH1/CTNS/GAMT/PLA1A/S100A9/QPRT/CPB2/SSTR2/CRP/JAK2/ANGPTL3/GCDH/SLC27A5/PCYT2/HPN/PHYH/ECH1/SEMA4G/GCAT/PLAC8/F2/SLC30A9/ACSL1/GSTM3/DHCR24/SAA4/CLPX/LYZ/CROT/B3GNT3/RIDA/AMBP/DDX27/F12/SMPDL3A/CES1/ABCA7/MAOB/GSN
REACTOME_SEPARATION_OF_SISTER_CHROMATIDS	189	-0.460273	-1.60169	0.000173938	0.0013856	0.000888573	4144	tags=39%, list=10%, signal=35%	CENPM/DYNC1LI2/ESPL1/HDAC8/CENPE/CENPL/NUP85/MIS12/B9D2/STAG2/NUP37/SKA2/CKAP5/TUBB2B/TUBA1C/CLASP1/ZWILCH/NUP160/ZW10/TAOK1/SPDL1/PPP2R5B/CDC20/CENPC/CDC23/ITGB3BP/CENPN/UBE2D1/WAPL/TUBB1/SMC3/RAD21/CENPO/UBC/XPO1/PLK1/SPC25/KIF2C/MAD2L1/SPC24/STAG1/CENPQ/DSN1/NUF2/CENPH/CENPK/INCENP/PDS5B/CENPI/CDCA5/NUP107/SGO2/SGO1/ERCC6L/NDC80/CENPA/CENPU/KNL1/TUBA1A/NDE1/ZWINT/KNTC1/CDCA8/CENPF/BIRC5/BUB1/S…
CHEN_ETV5_TARGETS_TESTIS	22	-0.784344	-1.92207	0.000174488	0.00138731	0.000889667	3464	tags=59%, list=8%, signal=54%	HELLS/CCNE2/RAD51/NFYB/HAUS6/DCK/DMC1/MCM2/RBL1/CDCA7/MKI67/TGFBR1/CDK2
REACTOME_SIGNALING_BY_WNT	325	0.433557	1.50187	0.000175413	0.00138995	0.000891359	5435	tags=36%, list=12%, signal=32%	H2AC6/PSME2/H2BC21/H2BC12/ROR1/PSMD8/H2AJ/AP2A1/PRKCA/CALM1/CLTA/H2BC4/FRAT1/RPS27A/PSMA7/WNT5A/LRP5/H2BC5/LRP6/AP2S1/PSME1/PSMD1/PSMB5/H4C8/PSMB6/H2BC8/PSMD9/CLTB/VPS26A/H3C10/PSMB10/PSMD14/SCRIB/PSMC4/H4-16/H2AC19/PSMA6/PSMD2/PSMD7/AP2M1/SKP1/CSNK2B/PSMA3/UBA52/PSMB4/PSMD13/FRAT2/UBB/PSMB1/PSMA5/PSMD4/H4C15/DVL1/PSMC2/PSMA4/PSMB7/PSMA2/PPP2R5A/PFN1/ITPR2/PSMD6/PSMB3/LEO1/CTNNBIP1/CXXC4/LEF1/CLT…
IVANOVA_HEMATOPOIESIS_EARLY_PROGENITOR	435	0.409697	1.45666	0.000175263	0.00138995	0.000891359	5103	tags=31%, list=12%, signal=28%	DEPTOR/MARS2/SRD5A1/KLHL5/PRDX1/PAQR7/AHCY/MGAT5/RPL18/CCDC86/SEPTIN6/G6PC3/MACROD1/MRPS12/SLC38A10/PPA1/RETSAT/RIOX2/GCSH/LYPLAL1/SUGCT/NME2/HSPA9/PPIF/DYNLRB1/VAPB/QDPR/RPS20/MRPS30/TFB2M/GSTM4/MRPS27/SNAPC1/SLC25A15/DNAJC15/EEF2KMT/ABHD11/BCKDHB/PSMB10/PPID/WDR12/MDH1/GGCT/ATPAF1/SLC35B2/GART/GPATCH4/OGFR/RABGGTA/SUCLA2/GATB/HPN/CLUH/PREP/BZW2/SFXN2/TRAK1/C9orf85/BCKDHA/ABCC4/BEX4/PINX1/RPS6KA…
DURAND_STROMA_S_UP	280	-0.423539	-1.53715	0.000178479	0.00141185	0.000905406	3812	tags=29%, list=9%, signal=26%	JAK3/SERPINB1/RTN4RL1/B4GALNT1/SDC3/PTN/ANGPTL4/AHR/BTBD2/LPL/ZC2HC1A/MID2/DEPDC7/PDE1A/MYO1D/RGS4/CTSO/CLDN1/ST6GAL1/ITGB3BP/SELENOP/COL4A6/OSMR/LOXL1/ARHGAP28/FZD1/PDLIM4/RPS6KA6/LRRC4C/COL1A2/PDE4D/MARCKS/RHOBTB1/PXYLP1/EFNA5/RSPO2/TFAP2A/COL1A1/ZNF618/MMP23B/DHRS7/IL4R/MMP2/TSPAN6/GALNT13/PYGO1/LPAR1/DCLK2/CSGALNACT1/NES/TAF9B/NOVA1/WDR60/DOCK3/NID2/PTPRF/NYNRIN/SLFN13/COL3A1/SEMA3F/PLEKHA2/A…
GARY_CD5_TARGETS_UP	471	0.408581	1.46636	0.000179674	0.00141891	0.000909929	4667	tags=31%, list=11%, signal=28%	CDKN1A/SC5D/SULT1A1/ALDH6A1/APEH/TKT/PDCD4/CD55/TPRA1/RPL13A/AGPAT1/CCNG1/GAS5/MAP1LC3B/ATP5F1D/MEGF9/ST6GALNAC4/SEPTIN6/PKN1/AP2A1/PSAT1/SESN2/ACY1/MACROD1/RPL31/MPST/NAXE/TMEM120A/NEAT1/SLC25A1/VAMP2/NADK/GARS1/CD99L2/AHCYL1/SUCLG2/GM2A/STAT1/HPCAL1/MARS1/WARS1/TSTD1/MALAT1/ABHD6/SLC1A5/STS/MAP2K2/SQSTM1/ARHGDIA/TNFSF9/GAA/SERINC3/NAGLU/POLD4/SLC3A2/LETMD1/TRIM4/VLDLR/LRRC28/WBP2/IFRD1/GABARAP/…
LEE_LIVER_CANCER_DENA_DN	73	0.603871	1.76982	0.000182215	0.00143656	0.000921248	2931	tags=33%, list=7%, signal=31%	AKR1C1/C4BPA/ACADSB/ME1/DCXR/CPT2/ACSM3/BAAT/OAT/SLC25A13/PAH/ABCD3/ALDH1A1/EPHX2/LACTB2/GCDH/SLC27A5/PON1/DMBT1/ALOX12B/PHYH/SLC2A2/GSTO1/ACSL1
HOEBEKE_LYMPHOID_STEM_CELL_UP	94	-0.545886	-1.73572	0.000183529	0.00144448	0.000926332	5808	tags=47%, list=13%, signal=41%	TMEM41B/KDM3A/ITSN2/DOCK1/MEF2A/TRAF3IP3/RAB31/NF1/RUNX3/HNRNPA1/SLC35E2A/SLC33A1/KMT5B/TRIM33/HLX/PNN/SCN3A/SLC38A1/TRAF4/SF3B1/RBM39/MCM3AP/TRAF5/CHD3/NCOR2/ABCA1/SETD5/TCF4/RERE/SATB1/RBBP6/EVL/TNFAIP3/CCNL1/KLF3-AS1/TRIB2/ITGA4/TPR/MSL1/KNTC1/SH3TC1/SFPQ/PGGHG/SETBP1
WANG_HCP_PROSTATE_CANCER	105	0.562274	1.73982	0.000184679	0.00145109	0.000930571	4561	tags=42%, list=10%, signal=38%	AEN/TACC2/TFEB/REC8/CITED2/CD55/SLC39A8/RPL28/CYP1B1/P3H2/BPGM/WWC1/RHOD/SIDT2/CTSA/LAMP3/WNT5A/PNMT/CRAT/RPS21/LONP1/NOP53/PRDX2/FTH1/DNAJB2/ASS1/GTF2H1/UBXN1/CCDC69/ST3GAL6/RETREG2/B3GAT3/S100P/CEACAM1/TUFT1/NAMPT/GRB10/PDLIM5/AASDHPPT/SH2D3A/CDK10/H2AC11/NEBL/CD2BP2
TONKS_TARGETS_OF_RUNX1_RUNX1T1_FUSION_MONOCYTE_UP	203	0.472979	1.56748	0.000187728	0.00147258	0.000944348	5153	tags=41%, list=12%, signal=37%	RGCC/GDF15/CTDSPL/CYP1A1/USP18/HSPD1/C1QBP/ECHS1/MYBBP1A/HSPE1/CXCL10/EBNA1BP2/NME1/GCSH/MDH2/APOE/NOP14/IFRD2/ATP1B3/PA2G4/AKR1C3/UXS1/PSMB5/HSPA5/RRP9/PTDSS2/TUBB2A/NHP2/ATP5ME/GTPBP4/APLP2/FAM216A/QPRT/NDUFAB1/GSPT1/DUSP14/PES1/CCND2/SLIRP/NPM1/MRPS35/DEXI/GLRX3/SLC20A1/EIF3B/BZW2/NR2F6/TEX2/RMND5A/TCP1/DDX24/MT2A/WDR43/CH25H/TFPI2/CTPS1/ISG15/GOSR2/CBS/NCLN/PUS1/AK2/IFIT1/NOLC1/EPRS1/DKC1/GFO…
REACTOME_LYSOSOME_VESICLE_BIOGENESIS	35	0.730117	1.84645	0.000194888	0.00152364	0.000977092	3179	tags=51%, list=7%, signal=48%	AP1S1/ARRB1/VAMP8/HSPA8/CLTA/VAMP2/AP1B1/VAMP7/AP1M2/CLTB/DNAJC6/CHMP2A/GNS/CLTC/TXNDC5/BLOC1S1/M6PR/ARF1
REACTOME_ESTABLISHMENT_OF_SISTER_CHROMATID_COHESION	11	-0.87561	-1.80239	0.00019472	0.00152364	0.000977092	4581	tags=91%, list=11%, signal=81%	SMC1A/ESCO1/STAG2/WAPL/SMC3/RAD21/STAG1/ESCO2/PDS5B/CDCA5
KAYO_CALORIE_RESTRICTION_MUSCLE_DN	87	0.592869	1.79374	0.000196594	0.0015323	0.000982645	3788	tags=36%, list=9%, signal=33%	RPSA/RRS1/CYC1/COX8A/ATP5F1B/VDAC2/HADHB/ABCC2/COX4I1/GOT2/RUNX2/NDUFV2/UQCRB/UQCRC2/SERINC3/VLDLR/MDH1/BAK1/CGREF1/MRPL23/PEX19/ECH1/BMP6/RAPGEF3/HADH/POLR2I/HRAS/TSNAX/RAB2A/COMMD1/DYNLT1
MARTENS_BOUND_BY_PML_RARA_FUSION	447	0.408555	1.45673	0.00019665	0.0015323	0.000982645	5481	tags=33%, list=13%, signal=29%	PGC/ZBTB16/RPS19/ALDH2/PLXND1/AK1/INKA2/TPRA1/PSAP/CCND3/NINJ1/ACP5/RPS6/SULF2/SH3BGRL3/ARRB1/PRKCD/CAMK2G/NDUFA4/TRNP1/TOMM40/RPS9/KLF2/FRAT1/UBL3/DENND3/NADK/GTF3A/IDH1/ATP6V0C/HPCAL1/P2RY2/MX2/GBA/PGPEP1/ITGB2/ACSF3/TNFAIP2/TOMM20/SQSTM1/RPL24/MRPL1/PSMD9/SPHK2/MRPL34/APLP2/HIVEP3/FAM216A/LETMD1/RPL9/SLC35B1/TNFRSF10B/PGD/SLC7A10/LTBP3/C20orf197/NBR1/UBASH3B/DCAF11/SEC11A/PDE4DIP/EXOSC4/MAP2K3…
LEE_LIVER_CANCER_DENA_UP	60	-0.603393	-1.78204	0.000197032	0.00153272	0.00098292	3238	tags=33%, list=7%, signal=31%	LPL/SOX9/B4GALT6/ANXA5/NKTR/GATM/CTSS/ABHD2/ANXA2/MCM6/COL4A2/LAMA5/VNN3/NOTCH3/CD24/COL4A1/KIF11/NDRG1/GPC3/ANXA1
REACTOME_POLO_LIKE_KINASE_MEDIATED_EVENTS	16	-0.830522	-1.88562	0.000204187	0.00158575	0.00101693	4945	tags=81%, list=11%, signal=72%	LIN54/PKMYT1/CDC25A/LIN9/CCNB1/EP300/PLK1/WEE1/MYBL2/CDC25C/CCNB2/CENPF/FOXM1
MARTINEZ_RESPONSE_TO_TRABECTEDIN_DN	269	-0.420998	-1.52163	0.000206057	0.00159762	0.00102454	4337	tags=33%, list=10%, signal=30%	VEGFC/RCOR1/TDG/LSM14A/KDM1A/RIPK1/MAT2A/MTMR4/NET1/UBR7/PANX1/TGIF1/NBN/PRIM2/XRCC5/TIAM2/THRAP3/PJA2/CDC42BPA/HDAC2/MYC/PRKACB/FRYL/BTAF1/CFLAR/NCOA6/LHFPL2/PKN2/SNIP1/FBXL3/RBM25/FYN/CDC23/SRRM2/EGFR/SIRT1/C15orf41/NPAS2/STK17B/FZD1/DCK/CORO1C/GOPC/TSPAN14/SPRY2/USP12/RBM17/ARHGEF2/MAP3K4/SRSF4/PRKD3/AURKA/ZNF345/TRIM24/PLK1/PHF6/DTL/POLD3/RSRC2/MAPK14/PDGFB/WEE1/LBR/FNDC3A/MCM3/SPIN1/CPSF7/UB…
SLEBOS_HEAD_AND_NECK_CANCER_WITH_HPV_UP	79	-0.568467	-1.75388	0.00020737	0.00160514	0.00102936	5503	tags=46%, list=13%, signal=40%	SOWAHA/MEIS1/SPICE1/RAP2B/LIG1/GK5/MYNN/ACTL6A/YBX2/SDHAP1/CENPW/KCNS1/CXCL17/RMI2/RIBC2/RNF168/MSL2/SLF1/C5orf34/CDKN2C/MCM2/PRPF38A/WEE1/CDC7/TOPBP1/HLTF/EZH2/CENPK/RFC4/MCM6/SLFN13/CDKN2A/USP1/FAM111B/KIF15/NUP210
ONDER_CDH1_TARGETS_2_DN	468	-0.372347	-1.40604	0.000208139	0.00160674	0.00103038	4256	tags=30%, list=10%, signal=27%	ARHGEF3/GPM6B/ITGB4/PLXNB1/GNAL/FGD6/MYO1B/LIMA1/CD83/SERPINB1/TBC1D4/CNTN1/BACE2/JAG2/PARP12/NCF2/XDH/IL1B/VGLL1/ZNF165/CCL20/LY75/SOX9/LYN/KRT17/MALL/PLK2/DSC3/PTHLH/IL1A/MMP10/CLDN4/ZC3H12A/SFRP1/PTGS2/GRB14/ARTN/LPAR3/MISP/SNX10/ADGRA3/MYO1D/ANK3/BDKRB2/LPCAT4/CLDN1/ST6GAL1/CXADR/IRF6/GNA15/SERPINA1/HOOK1/SFN/ROBO1/AGRN/PPL/RAPGEF5/RIMS3/IFIH1/INAVA/ITGA6/ST6GALNAC2/ADRB2/CNTNAP2/ADIRF/KCNJ15…
REACTOME_TRANSCRIPTIONAL_REGULATION_BY_E2F6	34	-0.696446	-1.8677	0.000208262	0.00160674	0.00103038	5749	tags=59%, list=13%, signal=51%	RBBP8/E2F1/EED/RYBP/PCGF6/MGA/RNF2/RAD51/EPC1/PHC3/SUZ12/BRCA1/RRM2/CDC7/EZH2/CBX5/APAF1/CHEK1/PCGF2/PHC1
RHODES_UNDIFFERENTIATED_CANCER	69	-0.601259	-1.80672	0.000213717	0.00164611	0.00105563	3728	tags=55%, list=9%, signal=50%	CEBPG/CDKN3/TRIP13/SLC16A1/H2AZ1/CDC20/COL1A2/RAD21/CCNB1/KPNA2/CDC6/KIF2C/MAD2L1/MCM2/MCM3/EZH2/MYBL2/RFC4/PCLAF/MCM6/GGH/NCAPH/CENPA/CKS1B/H2AX/NCAPD2/KIF14/GPSM2/CDK1/BIRC5/MELK/FOXM1/DLGAP5/CCNA2/UBE2C/HMGB2/TOP2A/TUBB
FIGUEROA_AML_METHYLATION_CLUSTER_3_UP	168	-0.471141	-1.61413	0.000214312	0.00164799	0.00105684	3533	tags=29%, list=8%, signal=27%	KCNAB3/VWA5A/NRP2/CYP26C1/BHLHB9/ZBTB14/BTAF1/KRTCAP3/ADGRG6/HILPDA/CAPS2/BCL7A/PIGZ/PCDHGB7/GUCY1B1/CEP41/NNAT/AMOTL1/PCDHB16/PCDHB11/MATR3/BTBD3/TANC2/ZFP28/CCDC34/HNRNPD/ZNF154/PCDHA11/AGO1/ZNF264/UHRF1/PYGO1/TMEM263/SLX4IP/ZNF84/PCDHB10/CASP2/COCH/ZNF662/RIPPLY3/ZNF281/PCDHB14/NFIX/ARHGAP44/POU5F1/TGFBR1/FAM83B/PCDHGB4/FSTL1
BIOCARTA_ETC_PATHWAY	10	0.903076	1.82552	0.000216192	0.001657	0.00106261	3153	tags=90%, list=7%, signal=83%	SLC25A6/ATP5F1A/SLC25A4/SDHB/SDHA/SDHD/SDHC/UQCRC1/NDUFA1
PID_ATR_PATHWAY	39	-0.676181	-1.88993	0.000215855	0.001657	0.00106261	4456	tags=56%, list=10%, signal=51%	CDC25A/SMARCAL1/NBN/YWHAZ/CEP164/RAD51/MCM7/RFC3/CLSPN/BRCA2/CDC6/RFC5/PLK1/MCM2/FANCD2/TOPBP1/RFC4/CDC25C/TIMELESS/CHEK1/CDK2/CCNA2
ZHU_CMV_24_HR_UP	83	0.583758	1.74941	0.000220992	0.00169102	0.00108443	3694	tags=42%, list=8%, signal=39%	EMP2/REC8/TUBA4A/IDH3A/GRPEL1/CD55/SYNGR2/HSPE1/PLA2G4A/IFI6/PDP1/TUBB2A/PSMA6/PSMD2/SCARB2/NPM1/PSMA3/ATP6V1C1/MLLT11/GMPR/POLR2K/SRF/TRIM22/EIF4E/TAP1/PSMA2/PSMD6/TFPI2/ISG15/PSMC1/LIG4/PSMB2/STIP1/NAMPT/GGCX
KEGG_AXON_GUIDANCE	129	-0.496915	-1.64774	0.000226889	0.00173331	0.00111155	4244	tags=47%, list=10%, signal=43%	ABLIM2/NTN3/NFATC1/EPHB1/PAK3/CFL2/NFATC3/UNC5D/PAK4/NGEF/PPP3CB/NCK2/PAK1/NRP1/EPHA5/EPHB2/RASA1/PLXNA3/SEMA3G/PLXNA1/PPP3CC/ROCK1/ROBO3/PLXNB1/NFATC4/EFNB2/SEMA6C/PAK2/EPHA4/EFNA2/SRGAP1/ABL1/SEMA4C/NTNG1/FYN/ROBO1/LRRC4C/PLXNC1/SRGAP2/EPHA2/MET/EFNA5/KRAS/NRAS/SEMA5B/EPHB4/EFNA4/FES/SEMA3F/SEMA3C/SEMA4B/SEMA3B/EPHA6/EPHA3/EFNA1/SLIT2/ROBO2/SEMA3A/SEMA3D/UNC5C/NTN1
REACTOME_HDR_THROUGH_SINGLE_STRAND_ANNEALING_SSA	37	-0.67885	-1.86725	0.000232949	0.00177671	0.00113939	3486	tags=65%, list=8%, signal=60%	RMI1/RPA2/RBBP8/RAD9A/WRN/TOP3A/NBN/RAD9B/MRE11/EXO1/ABL1/RMI2/RAD51/RFC3/RHNO1/BRCA1/DNA2/RFC5/ATM/BLM/TOPBP1/RFC4/BRIP1/BARD1
REACTOME_RNA_POLYMERASE_I_PROMOTER_ESCAPE	88	0.574246	1.74394	0.000236806	0.00180319	0.00115637	5420	tags=39%, list=12%, signal=34%	H2AC6/H2BC21/H2BC12/H2AJ/POLR2F/H2BC4/POLR2E/POLR2L/H2BC5/POLR1D/H4C8/POLR1C/H2BC8/CCNH/H3C10/H4-16/H2AC19/POLR2K/H4C15/CD3EAP/GTF2H1/H4C5/H2BC15/CDK7/H2AC18/H3C14/H3C1/H2AC8/ERCC2/POLR1E/TAF1D/H2BC7/POLR1B/H4C14
REACTOME_PTEN_REGULATION	139	0.528161	1.69904	0.000242277	0.00184185	0.00118116	4905	tags=48%, list=11%, signal=43%	PSME2/PSMD8/SNAI2/RRAGC/RPS27A/PSMA7/STUB1/CBX6/MAPK3/PSME1/PSMD1/PSMB5/PSMB6/LAMTOR3/PSMD9/PSMB10/PSMD14/PSMC4/RRAGA/LAMTOR5/PSMA6/PSMD2/PSMD7/CSNK2B/PSMA3/UBA52/PSMB4/LAMTOR1/SCMH1/PSMD13/UBB/PSMB1/TRIM27/PSMA5/PSMD4/PSMC2/PSMA4/PSMB7/PSMA2/PSMD6/PSMB3/RHEB/LAMTOR4/PSME3/BMI1/PSMC3/PSMC1/PSMB2/PSMF1/PSMD11/CBX4/PSMC6/MLST8/CHD4/SLC38A9/MAPK1/HDAC5/PSMC5/LAMTOR2/SEM1/PSMD12/PSMB8/PSMD3/RRAGB/CSN…
REACTOME_SUMOYLATION_OF_RNA_BINDING_PROTEINS	47	-0.653983	-1.87171	0.000244225	0.00185365	0.00118873	4762	tags=47%, list=11%, signal=42%	NUP93/POM121C/HNRNPC/UBE2I/NUP85/PHC2/NUP37/SUMO2/RNF2/NUP160/NUP58/HNRNPK/PHC3/NUP54/NUP153/NUP62/TPR/NUP107/PCGF2/PHC1/NUP210/NDC1
PEART_HDAC_PROLIFERATION_CLUSTER_DN	74	-0.583876	-1.78054	0.000247676	0.00187681	0.00120358	5278	tags=47%, list=12%, signal=42%	POLE2/PMS1/NF1/NFIC/TLK1/ZMYND11/LIG3/NBN/WT1/ATF5/SUV39H1/MYC/NCOA6/RAD51D/BCAT1/CCNE2/EIF2AK2/MCM7/RAD21/AURKA/PLK1/POLD3/ILF3/EMP3/CDC7/IFITM1/MCM3/MAP3K20/ZWINT/KNTC1/CCNB2/MCM5/PLK4/CXCL8/UBE2C
REACTOME_ADHERENS_JUNCTIONS_INTERACTIONS	33	-0.699877	-1.87835	0.000248495	0.00187997	0.00120561	3556	tags=45%, list=8%, signal=42%	ACTG1/ACTB/CTNND1/AFDN/ANG/NECTIN1/CDH1/CDH24/NECTIN3/CDH3/CDH7/CDH4/CDH10/CADM1/CDH2
REN_ALVEOLAR_RHABDOMYOSARCOMA_UP	98	-0.533262	-1.70347	0.000249382	0.00188364	0.00120796	7268	tags=51%, list=17%, signal=43%	MYLPF/MYOG/NCALD/PKP4/EYA2/SRSF7/SPINT2/ENO3/CHD7/RYR1/CELF2/TFAP2B/FGFR4/GNAS/ZNF536/TNNT2/JAG2/POGZ/PTBP2/ALPK3/DMPK/IGF2/RRAGD/SYNE2/RBM38/TUBB2B/FGF9/HEY1/PLXNC1/SIX1/TNNT3/AGPAT5/TGIF2/MYCL/PCDH17/CLCN5/EYA1/SOX11/TNNI2/CNR1/CHRNB1/PKIA/CYFIP2/NES/MYCN/IGSF3/DIO2/ATP2A3/TSPAN12/CDKN1C
ZHU_CMV_ALL_UP	108	0.555127	1.71577	0.000249789	0.00188367	0.00120798	3694	tags=38%, list=8%, signal=35%	EMP2/REC8/TUBA4A/IDH3A/GRPEL1/CD55/ITGA8/SYNGR2/HSPE1/CXCL10/PLA2G4A/MX2/WARS1/IFI6/PDP1/TUBB2A/DNAJA1/PSMA6/PSMD2/SCARB2/NPM1/PSMA3/ATP6V1C1/MLLT11/GMPR/POLR2K/SRF/TRIM22/EIF4E/TAP1/PSMA2/PSMD6/TFPI2/ISG15/PSMC1/LIG4/PSMB2/STIP1/NAMPT/H2AC18/GGCX
TIAN_TNF_SIGNALING_VIA_NFKB	26	-0.745721	-1.90745	0.000250444	0.00188558	0.0012092	3949	tags=65%, list=9%, signal=59%	CD83/NFKB1/IRF1/CCL20/PLK2/PTGS2/TRAF1/REL/IL6/NFKB2/TNIP1/TNFAIP3/NFKBIA/CXCL1/CXCL8/CXCL3/CXCL2
ZHONG_SECRETOME_OF_LUNG_CANCER_AND_FIBROBLAST	130	0.528547	1.68383	0.000256354	0.00192697	0.00123575	2706	tags=36%, list=6%, signal=34%	ACTA2/ME1/FUCA1/PRDX1/MSN/CD81/EEF2/RPL18A/GSR/CST3/GSTP1/PRDX6/LAP3/MDH2/TPT1/APOH/PSMA7/YWHAB/ANXA4/RPL10A/SPP1/EEF1A2/RACK1/CD9/PARK7/PSMB5/GOT1/ARHGDIA/HSP90AB1/PSMB6/PEBP1/AKR1B1/NPM1/PSMA3/UBA52/PSMB4/PSMB1/BGN/PSMA5/PSMA4/WDR1/TIMP2/SDC4/GSTO1/PSMB3/VCP/ATP6AP2
REACTOME_TCF_DEPENDENT_SIGNALING_IN_RESPONSE_TO_WNT	229	0.465096	1.56887	0.000259241	0.00194555	0.00124766	5070	tags=38%, list=12%, signal=33%	H2AC6/PSME2/H2BC21/H2BC12/PSMD8/H2AJ/H2BC4/FRAT1/RPS27A/PSMA7/WNT5A/LRP5/H2BC5/LRP6/PSME1/PSMD1/PSMB5/H4C8/PSMB6/H2BC8/PSMD9/H3C10/PSMB10/PSMD14/PSMC4/H4-16/H2AC19/PSMA6/PSMD2/PSMD7/CSNK2B/PSMA3/UBA52/PSMB4/PSMD13/FRAT2/UBB/PSMB1/PSMA5/PSMD4/H4C15/DVL1/PSMC2/PSMA4/PSMB7/PSMA2/PPP2R5A/PSMD6/PSMB3/LEO1/CTNNBIP1/CXXC4/LEF1/PPP2R1A/CUL3/PSME3/ZNRF3/WNT4/PSMC3/H4C5/PSMC1/PIP5K1B/H2BC15/PPP2R1B/PSMB2/W…
REACTOME_GLUTATHIONE_SYNTHESIS_AND_RECYCLING	12	0.877849	1.84593	0.000259738	0.00194617	0.00124806	2598	tags=62%, list=6%, signal=58%	GGT5/CNDP2/GCLC/GGT7/GGCT/GSS/CHAC2/GGT1
REACTOME_LAMININ_INTERACTIONS	30	-0.713776	-1.87376	0.000261307	0.00195479	0.00125359	4235	tags=60%, list=10%, signal=54%	ITGA2/COL4A3/COL4A4/ITGB4/NID1/LAMB1/ITGA1/COL4A6/ITGA6/LAMC1/COL7A1/LAMC2/NID2/COL18A1/LAMA3/COL4A2/LAMA5/COL4A1
TURASHVILI_BREAST_LOBULAR_CARCINOMA_VS_DUCTAL_NORMAL_UP	67	-0.595919	-1.79679	0.000261995	0.00195682	0.00125489	3475	tags=36%, list=8%, signal=33%	LAMB1/RGS1/FBN1/COL5A1/SPAG9/PLXNC1/COL1A2/CTHRC1/COL1A1/ENPEP/COL5A2/GPX8/INHBA/RAP2C/UBTD2/CCN4/COL3A1/MXRA5/COL11A1/SPARC/COL12A1/PRC1/VCAN/LOX
REACTOME_HOMOLOGY_DIRECTED_REPAIR	137	-0.487534	-1.61944	0.000264395	0.0019716	0.00126436	4490	tags=38%, list=10%, signal=34%	ABRAXAS1/PPP4R2/WRN/RNF8/POLK/LIG3/UBE2I/TOP3A/NBN/RAD9B/FEN1/MRE11/SUMO2/EXO1/RAD51D/ABL1/RMI2/POLD1/RFC1/RAD51/PARP1/RFC3/CLSPN/BRCA2/XRCC3/RNF168/UBC/RHNO1/PARP2/BRCA1/DNA2/RFC5/ATM/POLQ/XRCC2/POLD3/EME1/TP53BP1/BLM/GEN1/TOPBP1/RAD51AP1/POLE/RFC4/H2AX/BRIP1/TIMELESS/CHEK1/CDK2/BARD1/CCNA2/NSD2
REACTOME_PEROXISOMAL_LIPID_METABOLISM	29	0.747957	1.85168	0.000265727	0.00197838	0.00126871	5156	tags=59%, list=12%, signal=52%	ACOX2/ACAA1/ACOXL/SCP2/CRAT/ACOT8/PHYH/HACL1/MLYCD/HSD17B4/NUDT19/CROT/PECR/ABCD1/SLC25A17/ALDH3A2/ACBD4
GRYDER_PAX3FOXO1_ENHANCERS_KO_DOWN	437	-0.36609	-1.37975	0.000266618	0.00198186	0.00127095	5931	tags=36%, list=14%, signal=32%	KRCC1/PIGC/GADD45A/ZNF804A/RBBP8/ZNF331/ETV5/TENM3/EPHB2/ZNF57/FOXK1/SYTL3/EXTL3/MEIS1/CELF2/SPICE1/ASB7/TFAP2B/CACUL1/MEDAG/DUSP6/FANCF/LRRC10B/APP/WDFY3/GNAZ/MSH3/ZMIZ1/PPP4R2/MYH9/GALNT17/KIF5B/ACTG1/STAT3/SMARCB1/ARHGEF3/AUTS2/C5orf15/ADAM10/HELB/ACVR1/MIF/DOCK10/IFT81/RGS17/CEBPG/BCL2/ZC3H13/BTD/MDFI/SDC3/ACTB/NRP2/JARID2/FAM160B1/PROX1/PITX2/SLC38A1/LOXL2/CDON/CNOT2/ZNF568/CTDSP2/PRKG1/YWHA…
REACTOME_INTERLEUKIN_1_FAMILY_SIGNALING	134	0.526678	1.68634	0.000269055	0.0019968	0.00128053	4432	tags=43%, list=10%, signal=38%	SAA1/PSME2/NFKBIB/PSMD8/RPS27A/PSMA7/PSME1/PSMD1/PSMB5/SQSTM1/PSMB6/PSMD9/TOLLIP/PSMB10/PSMD14/PSMC4/NKIRAS1/PSMA6/PSMD2/PSMD7/SKP1/PSMA3/UBA52/PSMB4/PSMD13/UBB/PSMB1/PSMA5/PSMD4/PSMC2/PSMA4/PSMB7/IRAK3/PSMA2/PSMD6/ALOX5/PSMB3/IRAK2/IRAK1/PSME3/NKIRAS2/UBE2V1/PSMC3/PSMC1/PSMB2/PSMF1/PSMD11/PSMC6/TAB3/CHUK/PSMC5/SEM1/CUL1/PSMD12/IL1RL1/PSMB8/PSMD3
REACTOME_HDR_THROUGH_HOMOLOGOUS_RECOMBINATION_HRR	67	-0.595504	-1.79554	0.000272169	0.00201672	0.0012933	5749	tags=57%, list=13%, signal=49%	RBBP8/RTEL1/RAD9A/POLE2/SLX4/WRN/POLK/TOP3A/NBN/RAD9B/MRE11/EXO1/RAD51D/RMI2/POLD1/RFC1/RAD51/RFC3/BRCA2/XRCC3/UBC/RHNO1/BRCA1/DNA2/RFC5/ATM/XRCC2/POLD3/EME1/BLM/GEN1/TOPBP1/RAD51AP1/POLE/RFC4/BRIP1/CHEK1/BARD1
FIGUEROA_AML_METHYLATION_CLUSTER_7_UP	116	-0.504337	-1.63883	0.000275659	0.00203935	0.00130781	4702	tags=35%, list=11%, signal=32%	ZNF560/SPOP/FAM131A/PMAIP1/MYO7A/TGFB1I1/ARHGAP27/KCNAB3/NRP2/CYP26C1/BHLHB9/CHMP4C/ZBTB14/BTAF1/IFNAR2/FARP2/ADGRG6/HILPDA/RIMKLB/PIGZ/RPRD2/OSBPL1A/GUCY1B1/MORF4L1/NNAT/KDM5B/MPZL1/SRY/BTBD3/TANC2/CCDC34/HNRNPD/SLX4IP/THRB/ZNF84/CASP2/COCH/ZNF281/HNRNPR/CEP78/FSTL1
SHETH_LIVER_CANCER_VS_TXNIP_LOSS_PAM2	161	-0.47429	-1.61949	0.000279778	0.00206656	0.00132527	5420	tags=41%, list=12%, signal=36%	ARHGAP18/TCEAL9/LGALS1/TAGLN2/BTG2/DUSP6/BCL2L14/PFKFB3/APP/GOLM1/COL4A4/STT3A/BEX1/XYLT2/AJUBA/TAGLN/MCAM/SCN8A/EFNB2/KCNJ8/LPL/RTKN/TANC1/CLCF1/SKA2/UAP1L1/BICDL1/INHBB/B4GALT6/ACSL4/HMMR/ERI2/CAV2/TNFSF13/POFUT2/ABCC5/SLC1A4/DMC1/PSRC1/CCNB1/QSER1/FGD1/DAB1/SLF1/ZFP37/MCM2/NUF2/DSG2/CD276/TPM1/RRM2/PAQR4/FMNL3/IER3/RBP1/CENPH/PGM1/ANXA2/TACC3/SPARC/PTTG1/COL4A1/GJC1/SCD/TMEM45B/SLC39A4
GRADE_COLON_AND_RECTAL_CANCER_UP	289	0.440417	1.51556	0.000284068	0.00209415	0.00134296	4681	tags=41%, list=11%, signal=36%	GDF15/TKT/ATIC/TALDO1/PLAAT3/TGFBI/PRDX1/TRUB2/C4BPB/AHCY/TMEM97/TRAP1/DGAT2/NAA10/PLCB4/CCT5/HSPE1/PPA1/GCSH/DNAJA3/LDHB/GTF3A/KARS1/GCLC/DOLK/AAMP/ALG1/GARS1/EIF6/ENG/SPP1/HSPA9/CCT7/PDCD6/HM13/PA2G4/HSPA4/MARS1/EEF1E1/POLR1D/NIT2/EIF4B/POMP/PSMD14/CCT8/PSMG1/EIF3E/MRPL3/ACBD6/WDR74/NPM1/PSMA3/EIF2S2/CCDC85B/PNPT1/OLA1/EMC8/EIF3B/PMPCB/PSMB1/PFDN2/PSMD4/ETV4/OSER1/RTF2/PSMB7/TBCE/SSB/COPS8/PSMA…
JIANG_TIP30_TARGETS_UP	46	-0.652631	-1.86002	0.000284408	0.00209415	0.00134296	3475	tags=50%, list=8%, signal=46%	LAMB1/STAM2/CHST6/FYN/IGFBP3/RAPGEF5/ITGA6/C1GALT1/MALT1/WEE1/IER3/IFITM2/ENPP1/ANXA2/NDC80/NDE1/CDK1/AXL/P4HA1/PTTG1/CD24/VCAN/CDH2
KEGG_BUTANOATE_METABOLISM	34	0.72191	1.8237	0.000291152	0.00213709	0.00137049	2561	tags=41%, list=6%, signal=39%	AKR1B10/ACAT1/ALDH2/ACSM3/ECHS1/ALDH1B1/HADHA/BDH1/PDHA1/PDHB/HMGCL/ALDH5A1/HADH/ALDH9A1
ALONSO_METASTASIS_UP	191	0.482271	1.59646	0.000290712	0.00213709	0.00137049	3040	tags=37%, list=7%, signal=34%	CDKN1A/GHITM/TXNRD1/TUBA4A/ATP6V0D1/VDAC1/PLAAT3/ATP6V0B/MRPL15/TGFBR2/RPS10/CYC1/COX8A/CCT5/PRKCA/TMEM9B/DCAF13/SERPINA3/ACADM/DHRS11/HSPA8/COX6B1/NME2/AKT1S1/RPL10A/EIF3H/MRPL37/BTF3/SMDT1/PMM1/LIPA/LRPAP1/SDHD/TMCO1/SHB/ADSL/RABAC1/MDM2/NDUFB3/SMIM12/TIMM10/NHP2/APLP2/BCCIP/CD63/RRAGA/NDUFAB1/GRB2/GABARAP/LAMTOR5/ADK/MDH1/ELOC/SKP1/PRDX5/SPCS1/MRPS22/CHCHD1/NDUFB11/UBL5/PAICS/HIBADH/SLC25A33/P…
BYSTRYKH_HEMATOPOIESIS_STEM_CELL_QTL_CIS	129	0.53211	1.69012	0.000293814	0.00215326	0.00138086	6715	tags=50%, list=15%, signal=43%	RGCC/SC5D/CREG1/CST3/RPL26/ST6GALNAC4/F5/CBR1/NSDHL/ARNTL/SPG21/ATP6V1B2/TMCO1/CD59/F2R/CNIH1/PSMB6/MYO5A/LITAF/MRPS7/ITLN1/ATP5MPL/KIF1C/CCND2/ALAD/SNHG6/SCOC/COA3/CLEC16A/PRDX2/HARS1/CTSE/AGTRAP/USP38/NPL/PSMG4/CUX1/ALDH9A1/MPC2/DAP3/ELOA/GEMIN5/NECAP2/TBCB/ZMYM6/DDOST/TRAPPC12/MTIF2/MRPL35/ACADL/NVL/EMP1/ATAD1/MYOM1/NABP1/NUB1/CRYZ/GFER/PON2/D2HGDH/ADPGK/CD1D/OCEL1/MPO/CTSC
REACTOME_PROGRAMMED_CELL_DEATH	179	0.492123	1.6215	0.000294806	0.00215715	0.00138336	4846	tags=44%, list=11%, signal=39%	PSME2/FAS/C1QBP/BAX/PSMD8/PRKCD/CYCS/RPS27A/BCAP31/PSMA7/YWHAB/BBC3/H1-2/MAPK3/PSME1/PSMD1/PSMB5/PSMB6/PSMD9/PSMB10/PSMD14/PSMC4/TNFRSF10B/DFFA/PSMA6/PSMD2/PSMD7/TNFRSF10A/DAPK3/PSMA3/UBA52/PSMB4/DBNL/BAK1/KPNA1/BCL2L1/PSMD13/UBB/PSMB1/PSMA5/PSMD4/PSMC2/PSMA4/PSMB7/H1-4/TRADD/PSMA2/UNC5B/H1-0/PSMD6/PSMB3/BID/GAS2/PSME3/PSMC3/DIABLO/PSMC1/YWHAG/PSMB2/PSMF1/MAGED1/PSMD11/PSMC6/PLEC/MAPK1/DYNLL1/PSM…
DE_YY1_TARGETS_DN	93	-0.543591	-1.72633	0.000296929	0.00216929	0.00139115	6530	tags=56%, list=15%, signal=48%	PTP4A1/ERBIN/SMNDC1/NRP1/ITGAV/DST/RBBP8/HIPK2/RASA1/TAGLN2/CDC27/SOCS5/HNRNPC/HSP90B1/RBL2/TDRD3/RB1/RGS17/TNFRSF11B/PNN/PRKACB/PRKAA1/PKN2/BDKRB2/CCNE2/EGFR/AGGF1/OSMR/MET/CLIC4/APC/ENC1/PRKD3/NUMA1/MPHOSPH9/RBBP6/STAG1/CCNL1/LPAR1/SEPTIN10/CASP8AP2/RBL1/ECT2/INHBA/ITGA4/PTEN/TTK/HNRNPH1/EPHA3/CDK1/BARD1/ANXA1
KARAKAS_TGFB1_SIGNALING	18	-0.811162	-1.90767	0.000302297	0.00220507	0.00141409	1454	tags=44%, list=3%, signal=43%	BRCA1/PLK1/MMP2/BIRC5/BUB1/IGFBP7/LOX/CDH2
CLASPER_LYMPHATIC_VESSELS_DURING_METASTASIS_DN	35	-0.691377	-1.87853	0.000308715	0.00224839	0.00144187	2222	tags=46%, list=5%, signal=43%	FBN1/COL5A1/LOXL1/ROBO1/COL1A2/EMILIN2/LPAR1/SYK/COL5A2/CXCL6/COL3A1/SDC2/SEMA3C/VCAN/LOX/CDH2
LOCKWOOD_AMPLIFIED_IN_LUNG_CANCER	215	0.467754	1.55802	0.000311354	0.00226408	0.00145193	4271	tags=35%, list=10%, signal=31%	SRD5A1/AGPAT1/NDUFB5/SLC4A2/CERS2/PC/CCT5/FAM177A1/CALM1/NAXE/SDHA/CLPTM1L/RPS27/MRM2/MRPL36/TSFM/PDCD6/EEF1AKMT4/NPR1/CCT6A/SMIM12/JTB/POLD4/NDUFS6/SNAP29/CORO1B/EIF4G1/AP2M1/DDIT3/GCDH/ATP6V1C1/PSMB4/LAMTOR1/GNS/NDUFS2/B4GALT3/MBIP/MRPL23/DAP/GPAA1/COPS6/TSTA3/PPP1CA/DPP3/YKT6/POLR2J/OTULINL/SRP54/NAT10/CDK5/PRORP/H2BC19P/PCYT1A/PI4KA/CLCN2/MRPS17/S100A13/METTL1/TUFT1/CUL2/EAPP/ABCF2/NIPSNAP2/R…
PILON_KLF1_TARGETS_UP	494	-0.367966	-1.39503	0.000316948	0.00230119	0.00147573	4553	tags=29%, list=10%, signal=26%	TLK1/ABCC9/GPC6/PLEK2/OGA/C2CD2/ZNF639/MT1E/ESAM/HMG20A/TTLL5/TRMT10A/ZNF562/SCAI/KMT5B/ASPH/MBNL1/MED13/IGFBP2/EIF5A2/SERPING1/LUC7L2/TNKS2/ACTB/PUM2/MZT1/YPEL4/MSR1/MLLT3/NRP2/SETDB1/DMPK/IL1B/BCAR1/HECTD1/STON2/IGF2/LPL/PRSS53/LOXL2/LIPG/RYK/IGSF1/WDR19/FRYL/FAM114A1/SIN3A/SEPTIN2/TGFBR3/CAP2/GTF2H2C/HMGCS1/DENND2B/ACSL4/FOXP2/DCBLD2/XPR1/SRSF5/SLC30A10/LPP/ANK3/PXDN/DAAM1/GTF2IRD2B/HAUS1/C2or…
REACTOME_TRANSCRIPTION_OF_THE_HIV_GENOME	70	0.609669	1.78	0.000329616	0.00238946	0.00153234	6403	tags=54%, list=15%, signal=46%	POLR2F/ELOB/POLR2E/POLR2L/CCNH/SUPT4H1/GTF2A2/TAF10/ELOC/TAF4B/TAF9/POLR2K/GTF2E2/GTF2H1/POLR2I/POLR2J/ELOA/CDK7/TAF3/TAF12/CCNK/TAF13/SUPT5H/GTF2F2/NELFE/NCBP1/ERCC2/POLR2G/TAF7L/RNGTT/ELL/TAF1L/GTF2B/GTF2F1/POLR2D/TAF11/POLR2H/CTDP1
KEGG_ARACHIDONIC_ACID_METABOLISM	57	0.632766	1.75916	0.000342407	0.00247835	0.00158934	2612	tags=31%, list=6%, signal=29%	ALOX15B/GPX1/GPX2/GGT5/CBR1/GPX4/PLA2G4A/PTGES2/AKR1C3/PLA2G10/GGT7/CYP2J2/EPHX2/CYP2B6/ALOX12B/GGT1/ALOX5/PLA2G12A
REACTOME_SURFACTANT_METABOLISM	30	0.722575	1.79066	0.000348329	0.00251732	0.00161433	2715	tags=43%, list=6%, signal=41%	ADRA2A/CTSH/ADGRF5/NAPSA/SFTPB/SLC34A2/P2RY2/SFTA3/ADORA2B/LMCD1/SFTPC/DMBT1/SFTPA2
FOURNIER_ACINAR_DEVELOPMENT_LATE_DN	21	-0.767135	-1.8611	0.000352289	0.00254202	0.00163017	3556	tags=67%, list=8%, signal=61%	ACTB/CDKN3/TRIP13/ZWILCH/VRK1/EPHA2/AURKA/RRM2/NCAPG/CAPRIN2/CEP55/FGFBP1/FOXM1/ASPM
KANNAN_TP53_TARGETS_UP	58	0.623741	1.74051	0.000356135	0.00256581	0.00164543	4703	tags=47%, list=11%, signal=42%	CDKN1A/H2AC6/ACTA2/GDF15/APLP1/FAS/NINJ1/VIPR1/TST/ENG/BBC3/DDB2/IGFBP6/GALE/SCRIB/SLC3A2/SURF1/BAK1/NHLH2/FHL2/MAN2B1/HRAS/PLK3/NEFL/CES2/TAX1BP3/EXT2
MOOTHA_FFA_OXYDATION	23	0.774203	1.85697	0.000357432	0.0025712	0.00164889	2931	tags=61%, list=7%, signal=57%	ACADSB/ACAT1/CPT2/HSD17B10/ECHS1/CPT1A/HADHA/ACADM/HADHB/ACADVL/DECR1/CRAT/HADH/ACSL1
ENK_UV_RESPONSE_KERATINOCYTE_DN	480	-0.361679	-1.36854	0.00035799	0.00257127	0.00164893	5576	tags=34%, list=13%, signal=30%	BUB3/RASA1/EXTL3/RDX/BHLHE40/PCF11/NCOA3/ITSN2/GTF3C2/PPP2R5E/DHX9/CYP51A1/TGDS/MED7/BIRC3/SCML2/WWOX/IFI44/DDX42/STRN3/FLRT2/SMC1A/CPOX/ACYP1/CNOT4/MTMR3/CD46/ZMYND11/DKK1/RB1/STT3A/DLEU1/TLK2/SCAF11/ADH5/MTMR4/CAMKK2/MBNL1/CNTN1/TJP2/SYPL1/KDM5A/ACTL6A/PUM2/JAG2/MTF2/SLC11A2/PRPF4B/NBN/ZNF148/TRIP13/FPGT/SNX7/KHSRP/SLC16A1/DHX15/PCGF3/CNOT2/RBM8A/MBD2/SLC9A6/CTCF/FEN1/FNTB/RBM6/PTHLH/TFAP4/ENOS…
ROY_WOUND_BLOOD_VESSEL_UP	49	-0.634913	-1.81983	0.000358899	0.00257385	0.00165058	5011	tags=47%, list=12%, signal=42%	RAB31/ANGPT2/GNA12/ANXA6/FKBP1B/KCNJ8/S100A4/KDM5D/STC1/SRSF11/PCDH17/ANGPTL2/CYFIP2/COL5A2/NID2/TES/COL3A1/ZWINT/FBXL7/SLCO2A1/COL4A1/VCAN/CHN1
KEGG_FATTY_ACID_METABOLISM	42	0.685341	1.81217	0.000364448	0.00260566	0.00167098	2931	tags=43%, list=7%, signal=40%	ACSL5/ACADSB/ACAT1/ALDH2/CPT2/ECHS1/CPT1A/ALDH1B1/HADHA/ACADM/HADHB/ACAA1/ACADVL/GCDH/HADH/ALDH9A1/ADH1C/ACSL1
KEGG_TYROSINE_METABOLISM	42	0.685247	1.81192	0.000364448	0.00260566	0.00167098	6100	tags=43%, list=14%, signal=37%	TAT/FAH/MAOA/ALDH1A3/BUD23/PNMT/GOT2/GOT1/COMT/LCMT1/ADH1C/ALDH3B1/MAOB/HGD/DDC/TYRP1/AOC2/METTL2B
GAVIN_FOXP3_TARGETS_CLUSTER_T7	99	0.552801	1.69292	0.00036808	0.00262762	0.00168506	4531	tags=48%, list=10%, signal=44%	FTL/EIF3M/RPL18/JAK1/ATP5F1B/RPS9/FIS1/RPL32/AMD1/TIMM13/EIF3H/STAT1/CDC37/RPS7/LRPAP1/DDX54/GUK1/EIF3L/DCTN3/AKR1B1/SUPT4H1/STRAP/RPL10/MDH1/JAK2/LONP1/FAM50A/EIF3B/MRPL46/SCART1/NDUFA9/ECH1/QARS1/GDI2/PSTPIP2/USE1/CAST/MTHFD1/ALG5/RUVBL1/CYBA/RTCB/KLHDC2/PRPS1/CCT2/REEP5/PSMB8/PDRG1
JISON_SICKLE_CELL_DISEASE_DN	185	0.480898	1.59014	0.000376675	0.00268488	0.00172179	3372	tags=31%, list=8%, signal=29%	SLC25A6/RPL4/RPS28/KLF9/RPL13A/EEF1A1/RPL7/RPLP1/EEF2/EEF1G/RPS6/JAK1/RPL23A/TSC22D3/RPL14/RPS24/IMPDH2/RPS13/EIF3K/RPLP0/RPL13/HSPA8/RPL11/PABPC4/RPS27A/RPL19/COX6C/RPL10A/EIF3H/BTF3/PMM1/PNMT/RPL5/RPS7/RPL17/EEF1B2/RPS20/RPL24/MYOM2/EIF4B/RPL37/RPL6/EIF3E/RPL41/RPL30/NPM1/PKP3/SRSF8/TMC6/CELSR3/RNF126/RPL21/EIF3D/RPL22/ATP6V0E2/EIF3F/EIF4A2
WANG_CLIM2_TARGETS_UP	255	-0.412948	-1.4775	0.000377502	0.00268669	0.00172294	5822	tags=38%, list=13%, signal=33%	PTCD1/NPR2/ABI2/TAF1/LINC00662/TAPBP/TSHZ2/LMAN1/CD109/EED/ZNF783/DUSP6/CDC42SE1/IGFBP5/ARHGAP22/MYB/BCL11B/NISCH/BMS1P1/TNK2/RBM33/PARVA/PMS2P3/GGA2/SCAF4/IGFBP2/NEDD1/NAGA/POGZ/CIRBP/ZNF148/SLC25A40/GAREM1/CDON/KLF8/PAK2/BVES/AGO2/DIDO1/WDR33/PROSER3/SDR42E1/C21orf58/PPP1R26/SRSF5/NFYB/CAV2/ZCCHC8/CHTOP/ABCC3/SOCS2/DENND1B/MET/ZNF548/CDK3/SDHAP3/KRIT1/FER1L4/SIX2/ZNF160/PSMC3IP/OTUD3/ATXN7L1/CD…
SENESE_HDAC3_TARGETS_UP	486	-0.363011	-1.37471	0.000378754	0.00269151	0.00172604	5722	tags=37%, list=13%, signal=32%	SPTBN1/DLGAP1-AS2/ASH1L/XKR4/DUSP16/ANTXR2/EXTL3/MAP2/LMAN1/GALC/ARHGAP5/MOSPD1/DHX9/BIRC3/CDC27/BDP1/PIK3IP1/BTG2/AFF4/IL32/SNAP23/MIR100HG/DDX42/SUPT16H/IGFBP5/NF1/HAS2/RNF6/SHISA2/CCL2/CLDN12/ZNF451/PMAIP1/ZNF697/FAT3/VEGFC/SPRED1/CD46/AKT3/ADAM10/KLHL24/RB1/MMP16/MYO1B/OTUD4/CALM3/GGA2/ASPH/STK4/GTF2I/TBC1D4/TNFRSF11B/MBNL1/ZBTB38/CDK17/PIP5K1A/TNKS2/IL6ST/WAC/AP1S3/NR4A2/DDX3X/SINHCAF/SLC16A…
SHETH_LIVER_CANCER_VS_TXNIP_LOSS_PAM6	52	-0.646892	-1.88185	0.000388836	0.00275897	0.0017693	4283	tags=46%, list=10%, signal=42%	HMG20A/NFATC4/PTPN21/MKNK2/MMP10/BAMBI/ELK4/HDAC7/MLF1/LARP6/RTN4R/CREB1/AGPAT5/USP12/TEF/RAB27B/TRIM24/UHRF1/RRM2/PRCP/WEE1/ECT2/SYT11/CENPK
RODWELL_AGING_KIDNEY_UP	487	0.396157	1.42584	0.000393359	0.00278684	0.00178717	5495	tags=29%, list=13%, signal=26%	ARHGDIB/ADRA2A/RPS27L/ZMAT3/QPCT/HTATIP2/FDXR/APRT/RPS19/PSME2/TKT/RPL12/RPL13A/FAS/NT5E/TGFBI/RPL28/CCND3/GPX1/RPS2/LTF/VARS1/RPL18/SULF2/RPS10/SLC46A3/MIR34AHG/GGT5/SYNGR2/WDR46/MVP/RFTN1/GASK1B/RPL27/VSIR/C20orf27/ARPC1B/RPL35/UBE2D4/CCR1/TMPRSS4/RUNX2/ITGB2/LACC1/RPS25/POLR1D/STS/CXCL16/TNFAIP2/ZFAS1/TMED3/C1orf216/FAU/NNMT/LTBR/RRP12/RPLP2/PSMB10/GRN/SNHG12/AATF/PIK3CD/RPL10/GABBR1/CCND2/TSP…
FERNANDEZ_BOUND_BY_MYC	178	0.483718	1.59042	0.000402814	0.00284951	0.00182736	4722	tags=41%, list=11%, signal=37%	SRD5A1/ACO2/ALDH2/RPL13A/HSPD1/MSN/FECH/BAX/RPS6/CEBPA/SLC4A2/GSTP1/SYNGR2/HSPE1/RPL27A/AKAP1/NME1/ACADM/PHB/HSPA8/EPHX1/IFRD2/RPL19/VAMP2/AMD1/PLA2G4A/BBC3/QDPR/TXN/OCA2/MDM2/PDHA1/PPP1R7/UROD/GALT/PPID/CD63/RBM3/UBA52/PEX3/ID3/PSMB1/PI3/NR1D1/TOP1/SLC9A3R2/EIF4E/MAGEA3/PAICS/POLD2/ARF4/BSG/TGFB2/ELK1/NAB2/RPL22/FPGS/ARF1/HIF1A/SLC19A1/DKC1/PER1/TFRC/ATP1A2/PRKDC/HMBS/CSTB/IL11RA/EIF4A1/CST5/RAR…
ALCALA_APOPTOSIS	86	0.575775	1.73725	0.000406419	0.00287068	0.00184094	3433	tags=38%, list=8%, signal=35%	SLC25A6/TALDO1/VDAC1/FAS/EEF1A1/BAX/ATP1A1/HADHA/ATP5F1B/CCT5/RPLP0/MTCH2/HSPA8/BCAT2/TIMM17A/COX4I1/RPL10A/AP5Z1/MTCH1/OXA1L/TOMM20/SCAMP3/ATP5MG/ELOVL1/QPRT/STX4/SDHC/SLC25A3/HCCS/DENND1A/FAM104A/EIF3F/CEBPZ
SASAKI_ADULT_T_CELL_LEUKEMIA	166	-0.462596	-1.58312	0.000408994	0.00288271	0.00184865	2857	tags=33%, list=7%, signal=31%	PTHLH/SP1/EXTL2/TYMS/CEP164/MYO1D/DAAM1/LPCAT4/ARNT2/CCP110/RECQL/PARP1/ISG20/RFC3/TFAP2A/CCNB1/NEDD4/WWTR1/PLK1/KIF2C/HMGN4/PDE8B/SYT11/MCM3/FZD6/CD99/TRIB2/SGCE/PCLAF/ANXA2/MYCN/ZWINT/MKI67/KIF14/CCNB2/CENPF/TRIB1/NMI/FOXM1/TK1/PTPRM/CD47/DLGAP5/PTTG1/TPX2/BARD1/CCNA2/CAV1/UBE2C/HMGB2/CADM1/TOP2A/BUB1B/KIF11/TUBB
BIOCARTA_ALK_PATHWAY	37	-0.666901	-1.83439	0.000409353	0.00288271	0.00184865	2724	tags=49%, list=6%, signal=46%	HNF1A/ACVR1/TGFBR3/RFC1/CHRD/TGFB3/BMPR1A/FZD1/APC/SMAD5/NPPB/SMAD4/BMPR2/ATF2/TGFBR1/SMAD1/BMP5/MEF2C
KEGG_SMALL_CELL_LUNG_CANCER	84	-0.549444	-1.72165	0.000412986	0.00290393	0.00186226	6356	tags=49%, list=15%, signal=42%	BIRC2/TRAF2/ITGAV/E2F1/XIAP/RXRA/BIRC3/PIK3R1/ITGA2/AKT1/TRAF6/PIAS3/COL4A4/AKT3/PIK3R5/RB1/BCL2/NFKB1/LAMB1/TRAF4/MYC/PTGS2/TRAF1/CCNE2/COL4A6/ITGA6/TRAF5/E2F2/LAMC1/LAMC2/PIK3CB/PTEN/APAF1/LAMA3/COL4A2/CKS1B/LAMA5/NFKBIA/CDK2/COL4A1/SKP2
OSWALD_HEMATOPOIETIC_STEM_CELL_IN_COLLAGEN_GEL_UP	221	-0.428338	-1.51678	0.000418006	0.00293482	0.00188207	3949	tags=36%, list=9%, signal=33%	BTG2/GCFC2/BRD4/EGR3/FOSB/NF1/CCL2/HNRNPA1/ARMC8/CD83/TNF/GPR183/IER2/ADD1/CIRBP/NR4A2/RGS1/IL1B/AVPR1A/PROX1/FBN1/SF3B1/PLK2/IL1A/CFLAR/ODF2/ZC3H12A/GANAB/NR5A2/ANGEL2/PIK3C2B/HNRNPDL/PRRC1/ZWILCH/PTGS2/NUP160/ATL2/PDE4B/PHF14/IL6/SRRM1/HOOK1/H1-10/PPP1R15A/HIPK1/HOMER3/FBXO11/SPRY2/MAFF/SMC3/CHD3/TFAP2A/TCF4/FERMT2/FUS/TNFAIP3/TREM1/DDX3Y/EGR1/IER3/SERPINB2/SLC12A2/CENPI/COL2A1/MCL1/NFKBIA/TRIB…
REACTOME_RNA_POLYMERASE_III_TRANSCRIPTION_INITIATION_FROM_TYPE_3_PROMOTER	28	0.753411	1.85035	0.000420158	0.00294551	0.00188892	6149	tags=61%, list=14%, signal=52%	POLR2F/POLR3H/POLR2E/POLR2L/POLR1D/POLR1C/SNAPC1/POLR2K/SNAPC5/SNAPC2/POLR3E/POLR3K/POLR3D/POLR3B/SNAPC3/POLR3A/POLR2H
REACTOME_ELASTIC_FIBRE_FORMATION	45	-0.640816	-1.833	0.000424434	0.00297104	0.0019053	3212	tags=33%, list=7%, signal=31%	FBN1/LOXL2/TGFB3/LOXL1/EMILIN2/FBLN5/ITGB8/FBN2/LTBP4/FBN3/EFEMP2/LOX/FBLN1/MFAP4/MFAP2
MOHANKUMAR_HOXA1_TARGETS_DN	165	-0.46584	-1.59208	0.000429816	0.00300422	0.00192658	3404	tags=28%, list=8%, signal=26%	MATN3/CGNL1/AVPR1A/EPHA4/MCMBP/MUC1/TRIL/MUC5AC/PROS1/RAB3B/TNC/ST8SIA4/MGLL/ADGRG2/INAVA/ST6GALNAC2/GUCY1A1/ADIRF/XCL1/DKK3/CLIC3/IL4R/FAM83E/ABHD2/LAMC2/NPPB/PKIA/PHLDB2/PLA2G3/PDE8B/PREX2/INHBA/NYNRIN/SCUBE2/FGF11/MYCN/IGSF3/CLGN/NMI/SLCO2A1/WLS/CADM1/DSC2/FXYD3/ANXA1/MFAP2/CKB
DARWICHE_SKIN_TUMOR_PROMOTER_UP	140	0.517783	1.66635	0.000433692	0.00302679	0.00194105	3817	tags=31%, list=9%, signal=28%	FTL/ACTA2/ATP6V0D1/CITED2/APOD/PAQR7/COX5B/SOD1/RAB5IF/SRM/RPS3A/TGFA/GABARAPL2/YWHAB/ENG/SPP1/GBA/SSU72/QDPR/EEF1B2/CXCL16/NHP2/BAIAP2/CAPN2/CHP1/S100A9/MAP1LC3A/PGAM1/PDCD5/TCP1/CCT4/OVOL2/LTB4R/PLAC8/ART5/IRAK1/ESD/LYZ/TTLL11/C9orf16/RUBCN/RNF181/DYNLL1
REACTOME_MITOCHONDRIAL_IRON_SULFUR_CLUSTER_BIOGENESIS	13	0.854356	1.82053	0.00043665	0.00304291	0.00195138	4366	tags=77%, list=10%, signal=69%	FDXR/ISCU/NFS1/FDX2/GLRX5/FDX1/LYRM4/ISCA2/SLC25A37/ISCA1
DARWICHE_PAPILLOMA_RISK_HIGH_DN	177	0.47699	1.5656	0.000437546	0.00304462	0.00195248	3406	tags=28%, list=8%, signal=26%	ACTA2/ATP6V0D1/PVT1/CITED2/EIF5A/APOD/PAQR7/SOD1/CHST11/PABPC4/PEPD/APOE/GABARAPL2/YWHAB/ABHD14B/GADD45GIP1/SPP1/GBA/COQ8A/PLA2G10/TYRO3/PEX16/BAIAP2/CALCOCO1/CAPN2/CHP1/SLC35B1/QPRT/LRRC58/STRAP/MAP1LC3A/DENR/CALM2/C14orf119/SRF/IFT20/AFF3/TCP1/CHCHD5/GTF2E2/OVOL2/FAM3A/PLAC8/IRAK1/CDS1/LYZ/RTRAF/TTLL11/SLC39A13
OSMAN_BLADDER_CANCER_UP	393	-0.380501	-1.42435	0.000441085	0.00306469	0.00196535	4206	tags=31%, list=10%, signal=29%	CHD9/KLHL24/ZNF562/USP42/SCAF11/SYNCRIP/DPYD/STK4/CAMKK2/MBNL1/FAR1/USP47/RIPK2/INO80D/TNKS2/SNX13/FOXN2/NBN/ZNF148/FPGT/SLC25A40/SSH1/YEATS4/ATF7IP/SAP30/TRAK2/KBTBD6/SF3B1/RASA2/BBX/RSBN1/SGMS2/UBA6/ZNF316/TMOD3/GANAB/BRWD3/IFNAR2/RBM12B/XRCC4/B4GALT6/TYMS/LGALS3/RO60/RIF1/AASDH/TTC17/SMG1/ATXN1/ZNF641/TGOLN2/TMED8/EWSR1/ZC3H7A/HAUS6/TNFSF13/H1-10/TBC1D8/PDIA3/TMEM107/NKTR/AZI2/RECQL/SLC1A4/PHC…
NABA_SECRETED_FACTORS	312	-0.393497	-1.43991	0.000458614	0.00318176	0.00204043	4412	tags=21%, list=10%, signal=19%	INHBE/CNTF/LTB/VEGFC/CTF1/ZFP91/BRINP3/SHH/TNF/WNT9A/FLT3LG/NRTN/PTN/ANGPTL4/IL1B/IGF2/CCL20/CLCF1/WFIKKN1/S100A4/IL1A/EGFL8/INHBB/SFRP1/PDGFD/ARTN/MST1/PDGFC/FGF9/CHRD/TGFB3/IL6/TNFSF13/S100A10/XCL1/FGFBP3/GDF11/ANGPTL2/INHA/PDGFB/WNT7B/MDK/FGF2/HBEGF/VEGFA/PGF/CXCL6/INHBA/CCL28/SCUBE2/FGF11/CXCL1/FGFBP1/BMP5/CXCL8/CXCL13/CXCL3/TNFSF10/PDGFA/CXCL2/SCUBE3/CHRDL1/FSTL1/FRZB
REACTOME_TRANSCRIPTIONAL_REGULATION_BY_RUNX1	234	0.450331	1.52414	0.000465	0.00321654	0.00206273	5070	tags=35%, list=12%, signal=31%	H2AC6/PSME2/H2BC21/H2BC12/CCND3/GPAM/PSMD8/H2AJ/H2BC4/RPS27A/PSMA7/H2BC5/CBX6/RUNX2/PSME1/PSMD1/PSMB5/H4C8/PSMB6/H2BC8/PSMD9/CCNH/H3C10/PSMB10/PSMD14/PSMC4/H4-16/H2AC19/CCND2/PSMA6/PSMD2/PSMD7/CSNK2B/PSMA3/UBA52/PSMB4/SCMH1/PSMD13/SMARCA2/UBB/PSMB1/PSMA5/SMARCD2/PSMD4/H4C15/PSMC2/PSMA4/PSMB7/CCND1/PSMA2/PSMD6/PSMB3/PSME3/BMI1/PSMC3/H4C5/PSMC1/H2BC15/PSMB2/PSMF1/PSMD11/CBX4/PSMC6/CDK7/H2AC18/CDK6/…
REACTOME_MRNA_SPLICING	188	-0.439382	-1.52729	0.000464873	0.00321654	0.00206273	6479	tags=43%, list=15%, signal=37%	SF3A1/SMNDC1/SRSF7/SNRNP200/CDC40/PHF5A/SF3A2/DHX38/ISY1/SNRPA/WBP4/DDX23/CSTF2T/RBM5/PCF11/ELAVL1/DHX9/GCFC2/DDX42/PPIL6/ALYREF/CDC5L/HNRNPC/DDX5/HNRNPA1/WBP11/RBM22/LSM2/PCBP1/PPIL4/PCBP2/SNRPA1/DHX15/NUDT21/RBM8A/SF3B1/U2SURP/SF3B3/CWC22/CCAR1/WDR33/PRPF8/HNRNPF/HNRNPA2B1/SRSF2/SNRNP40/TRA2B/PRPF3/SRSF5/SNRNP35/POLR2A/PPIH/SF1/AQR/SRRT/SRRM2/HNRNPA3/SRRM1/PPWD1/HNRNPK/LSM6/SRSF10/HNRNPL/SRSF11…
NIKOLSKY_BREAST_CANCER_5P15_AMPLICON	25	0.760851	1.84897	0.000466815	0.00322433	0.00206773	4098	tags=50%, list=9%, signal=45%	AHRR/SDHA/CLPTM1L/MRPL36/PDCD6/PLEKHG4B/NDUFS6/EXOC3/SLC6A3/AHRR/SLC9A3/C5orf38/LPCAT1
CAIRO_HEPATOBLASTOMA_UP	212	-0.428159	-1.51236	0.00046925	0.00323162	0.0020724	4105	tags=33%, list=9%, signal=30%	DKK1/FKBP1B/BEX1/MCAM/ZBTB38/JARID2/SP3/SMYD2/TULP4/KDM3B/CKAP4/RBM12/HDAC2/NUP37/ANGEL2/SEPTIN2/CAP2/BAMBI/HMGCS1/HIP1/SMARCC1/HSPB1/CAMSAP2/CDC23/PAPSS1/ROBO1/PLXNC1/HSPA2/C11orf95/ITGA6/SLC1A4/MARCKS/RHOBTB1/KDM5B/MPZL1/MAP3K4/TBC1D9/RNF38/FNBP1L/MMP11/DDHD2/SLF2/LAMC1/DZIP3/CLMN/CRIM1/SUCO/GSTA4/HMGN4/GMNN/BRD3/MCM3/CBX5/DRAM1/TRIB2/RACGAP1/ETV1/ASAP2/TIA1/PRKD1/CREB3L2/SOX4/CD24/ZNF189/CBX1/…
BOQUEST_STEM_CELL_DN	212	-0.428304	-1.51287	0.00046925	0.00323162	0.0020724	5927	tags=34%, list=14%, signal=29%	FLI1/IFI27/TSPAN13/SH2B3/CHD7/RNASE1/SWAP70/MYO5C/LRMP/CYTH1/DUSP6/FLT1/CARD10/PCDH12/ANGPT2/ERG/PALMD/SELE/JAG2/EFNB2/SSH1/CLIC5/CFLAR/NR5A2/PIK3C2B/EOGT/LPCAT4/IFI44L/ST6GAL1/CARD8/CFI/KIAA0355/STC1/FABP5/RAPGEF5/IFIH1/ITGA6/ADRB2/SOCS2/MET/ISG20/MCF2L/ICA1/TBC1D9/ABCG1/PCDH17/FNBP1L/TPD52/TSPAN6/EPHB4/HHEX/DSG2/LPAR6/SEC14L1/HBEGF/ADGRL4/SCUBE2/ANXA3/CLDN5/SEMA3F/PITPNC1/CDK1/PTPRM/EFNA1/PTPRB…
GAZDA_DIAMOND_BLACKFAN_ANEMIA_MYELOID_DN	38	0.68984	1.77338	0.000476133	0.0032742	0.00209971	5559	tags=63%, list=13%, signal=55%	RPL28/COX5B/PRKCD/HADHA/PHB/RPS14/APOE/TAX1BP1/RPL36/CD59/DCTN3/UROD/MRPL23/NUDT3/POLR2I/EID1/CHMP4A/PNPLA4/MAPK1/PQBP1/KLRF1/COX11/ARIH2/PXMP2
REACTOME_SUMOYLATION_OF_SUMOYLATION_PROTEINS	35	-0.685156	-1.86163	0.000483732	0.00332158	0.00213009	7167	tags=51%, list=16%, signal=43%	NUP35/POM121/AAAS/NUP93/POM121C/UBE2I/NUP85/NUP37/SUMO2/NUP160/NUP58/NUP54/NUP153/NUP62/TPR/NUP107/NUP210/NDC1
REACTOME_G1_S_SPECIFIC_TRANSCRIPTION	29	-0.708987	-1.84373	0.000495745	0.00339412	0.00217661	5734	tags=55%, list=13%, signal=48%	E2F1/LIN54/CDC25A/RBL2/TYMS/LIN9/ORC1/CDT1/CDC6/FBXO5/POLA1/RRM2/RBL1/CDC45/CDK1/TK1
BOYAULT_LIVER_CANCER_SUBCLASS_G56_DN	17	-0.804245	-1.87098	0.000495472	0.00339412	0.00217661	3456	tags=59%, list=8%, signal=54%	BHLHE40/AGPAT2/LGALS3BP/MAFF/IL4R/IER3/NAV2/RAB27A/TRIB1/VNN3
GALE_APL_WITH_FLT3_MUTATED_DN	16	0.824125	1.85438	0.00050887	0.00347889	0.00223097	4594	tags=69%, list=11%, signal=62%	NDUFV1/RABAC1/ST3GAL5/GPR137/NDUFB7/DRAP1/ARF1/HLA-B/PQBP1/BAD/NAPG
SEMBA_FHIT_TARGETS_DN	10	-0.880802	-1.76615	0.000511774	0.00349364	0.00224043	944	tags=70%, list=2%, signal=68%	ECT2/MNS1/SPAG5/CENPF/BIRC5/PLK4/ASPM
WEST_ADRENOCORTICAL_TUMOR_UP	296	-0.394316	-1.44655	0.000514855	0.00350956	0.00225064	4483	tags=36%, list=10%, signal=33%	CYP51A1/KIF1B/MTHFD2/TMEM106C/FGFR4/IL32/NUDT1/DCAF15/RNF34/ANGPT2/PMAIP1/CDC25A/RFWD3/KIF5B/TDG/QTRT2/CENPM/ESPL1/UBE2S/PCYOX1L/CEBPG/SART3/CDK17/P4HA2/MTF2/IGF2/SLC16A1/SNRPA1/RDH11/TUBA1C/H2AZ1/PANK3/ANKMY2/HMGCS1/EXTL2/ZWILCH/PDE4B/FGFR1OP/ELF4/MLF1/PARPBP/CDC23/GLO1/CDK5RAP2/STC1/PLXNC1/FBN2/INTS7/CAD/DNMT1/DICER1/CCNB1/HSPA13/AURKA/RALGPS1/CLINT1/XPO1/ENO1/RFC5/IGF2BP3/CHAF1A/NRAS/DTL/KIF2C…
MCBRYAN_PUBERTAL_BREAST_4_5WK_DN	197	0.462769	1.53388	0.000521904	0.00355244	0.00227814	4174	tags=34%, list=10%, signal=31%	PDK4/ZBTB16/ACAT1/ACO2/KLF15/GPAM/SUCLG1/ATP5F1D/PPA1/STEAP3/MTCH2/PRKCE/NEAT1/HSPG2/BCAT2/C20orf27/LRP5/MCRIP2/AHCYL1/GM2A/CISD1/PTGES2/LIPA/COQ8A/ACADVL/MALAT1/EDNRA/IMMT/EPAS1/TMEM14C/APLP2/LETMD1/KIF1C/SLC7A10/EIF4G1/PEX6/ATP6V0A1/ACSF2/SLC25A10/EHD1/RASSF3/NR1D1/ECH1/YKT6/CUX1/IDH3B/HCCS/DBT/ACSL1/GALNT2/IGFBP4/REEP6/STOM/YWHAG/NIPSNAP3A/RCC1L/ERAL1/COQ5/BMP1/ZFAND5/DMAC2/GRB10/CCNK/MLX/CCN1…
SESTO_RESPONSE_TO_UV_C0	107	0.542821	1.67872	0.000526167	0.00357399	0.00229196	4200	tags=46%, list=10%, signal=41%	SAA1/GNAI1/GDF15/CITED2/ISCU/NDUFA4/BPGM/CLTA/RPS27/CDC37/PPIF/SQSTM1/TPMT/DNAJA1/BAG1/GTF2A2/RRAGA/EIF2S1/ELOC/PSMA3/TAF9/CAMLG/MCFD2/EIF2B1/HARS1/HSPH1/POLR2K/SLC39A6/PSMA4/TAP1/CLP1/TCP1/PSMD6/HCCS/NEU1/TFPI2/UBE2V2/M6PR/XPC/PRNP/MRPL49/PPP1CC/CDK7/GSK3A/DYNLL1/COPS2/CTR9/TFRC/PRSS8
REACTOME_SIGNALING_BY_INTERLEUKINS	445	0.402443	1.43221	0.000526596	0.00357399	0.00229196	4630	tags=29%, list=11%, signal=26%	SAA1/INPP5D/CDKN1A/MAOA/BATF/PSME2/NFKBIB/PDCD4/TALDO1/MSN/GSTA2/PSMD8/JAK1/FOXO1/RPLP0/SOD1/CXCL10/BOLA2B/HSPA8/LCN2/RPS27A/VAMP2/PSMA7/HSPA9/STAT1/VAMP7/CCR1/MAPK3/PSME1/ITGB2/PRKACA/MAPK11/PSMD1/PSMB5/SQSTM1/PSMB6/PSMD9/TOLLIP/H3C10/PSMB10/PSMD14/PSMC4/NKIRAS1/PIK3CD/PIK3R3/GRB2/MAPKAPK3/PSMA6/STX4/PSMD2/PSMD7/JAK2/PITPNA/SKP1/PSMA3/UBA52/PSMB4/STX3/BCL2L1/PSMD13/UBB/PSMB1/CRLF1/PSMA5/IL13RA2/…
REACTOME_EXPORT_OF_VIRAL_RIBONUCLEOPROTEINS_FROM_NUCLEUS	33	-0.680445	-1.8262	0.000529661	0.00358958	0.00230196	7167	tags=52%, list=16%, signal=43%	NUP35/POM121/AAAS/NUP93/POM121C/NUP85/NUP37/NUP160/NUP58/XPO1/NUP54/NUP153/NUP62/TPR/NUP107/NUP210/NDC1
BHATI_G2M_ARREST_BY_2METHOXYESTRADIOL_DN	126	0.517949	1.64252	0.000534147	0.00361475	0.0023181	6235	tags=49%, list=14%, signal=42%	PRKCZ/RPL12/RPL3/EEF2/RPS2/RPL26/SARS1/PSAT1/SESN2/MACROD1/RPL31/SPSB2/RPS17/RPL36A/ABHD14B/GARS1/RPL10A/BFSP1/P2RY2/TMPRSS4/AIG1/SQSTM1/NIPAL3/EEF2KMT/IGBP1/BAG1/EIF2S3/IFRD1/RBM3/DDIT3/ZNF581/NOP53/NOA1/DENND2D/CCNB1IP1/DCN/LAPTM5/RPL34/PGLS/PRKAG1/CBS/SNAPC5/CAST/MYL5/EPRS1/CTH/HCAR1/ZNF277/NEURL2/CSNK2A2/HERPUD1/LENG1/TIMP4/TYRP1/MPND/HELQ/VMO1/GPT2/MLANA/ZNF490/B3GALT6/GCHFR
DEBIASI_APOPTOSIS_BY_REOVIRUS_INFECTION_UP	300	-0.39243	-1.43665	0.000546257	0.00369138	0.00236724	5891	tags=37%, list=14%, signal=32%	GADD45A/ZNF529/IFI27/GTF2H2/ABI2/BUB3/BHLHE40/ARHGAP5/DHX9/TGDS/RYBP/CDC27/IFI44/WTAP/EGR3/TMCC1/NF1/STRN3/RNMT/RAB11FIP2/ZNF623/TAF5/SNRK/THAP12/TLK1/KPNA5/PMAIP1/GEMIN2/ARPP19/IFI35/YAP1/OTUD4/SOCS6/CLK3/CEBPG/CDK17/IREB2/ITCH/PRPF4B/NR4A2/TADA2A/THUMPD1/IFIT5/PRKAA1/SPRY1/PDCL/RLF/DTNA/CAP2/SP1/ZNF24/PANK3/RND3/RSAD2/FOXJ3/FGFR1OP/TAF1A/IFI44L/CCNE2/FGF9/IRF7/CCP110/NUP58/MAP4K5/SREBF1/AC11854…
RUAN_RESPONSE_TO_TNF_DN	77	0.578835	1.71162	0.000553916	0.00373773	0.00239697	4235	tags=38%, list=10%, signal=34%	ME1/TALDO1/GPAM/CEBPA/NFS1/PC/TST/ACADM/ESYT1/IDH1/RASD1/MMUT/ALDH1A1/NNMT/ALAD/FASN/BCKDHA/IDH3G/ECH1/IRX3/PLIN4/HSD17B4/AP3S1/ACSL1/CBX4/AK2/NR1H3/SCARB1/REEP5
CONRAD_STEM_CELL	39	-0.657198	-1.83687	0.000558248	0.00376155	0.00241224	4402	tags=49%, list=10%, signal=44%	REXO1/AKT3/TEP1/MYC/TINF2/PHTF2/ZFP42/POU6F1/DKK3/SALL2/DNMT3B/ZNF436/MYBL2/KLF5/POU5F1/SOX2/PROM1/PHC1/GJA1
REACTOME_APC_C_CDH1_MEDIATED_DEGRADATION_OF_CDC20_AND_OTHER_APC_C_CDH1_TARGETED_PROTEINS_IN_LATE_MITOSIS_EARLY_G1	72	0.585273	1.71262	0.000565818	0.00380708	0.00244144	4432	tags=58%, list=10%, signal=52%	PSME2/PSMD8/RPS27A/PSMA7/PSME1/PSMD1/PSMB5/PSMB6/PSMD9/PSMB10/PSMD14/PSMC4/PSMA6/PSMD2/PSMD7/PSMA3/UBA52/PSMB4/PSMD13/UBB/PSMB1/PSMA5/ANAPC7/PSMD4/PSMC2/PSMA4/PSMB7/PSMA2/PSMD6/PSMB3/PSME3/PSMC3/PSMC1/PSMB2/PSMF1/PSMD11/PSMC6/PSMC5/SEM1/PSMD12/PSMB8/PSMD3
REACTOME_ION_CHANNEL_TRANSPORT	181	0.476893	1.57575	0.000567722	0.00380894	0.00244263	4458	tags=30%, list=10%, signal=27%	ATP12A/ATP6V1A/ATP6V0D1/ATP6V1E1/ATP6V0B/ATP1A1/CAMK2G/ATP6V0A4/TSC22D3/ATP6V1H/ATP6V1F/CALM1/SCNN1G/ATP6V1D/RPS27A/ATP6V0E1/ATP1B3/SCNN1A/ATP6V1B2/ATP6V0C/CLCA2/TRPV6/ATP6AP1/SCNN1B/ATP13A2/MCOLN1/CLCN4/ATP6V1C1/UBA52/ATP6V0A1/ATP13A1/ATP6V1G1/UBB/CLIC2/ATP6V1G2/NEDD4L/TPCN1/ATP10B/STOM/ATP6V0E2/CLCN2/SGK2/ANO9/ATP2C2/OSTM1/CLCN7/ASIC3/WNK2/CLCN3/PDZD11/ATP4B/TRPV2/ATP1A2/FXYD4
CERVERA_SDHB_TARGETS_2	114	-0.510797	-1.65332	0.000567113	0.00380894	0.00244263	2977	tags=36%, list=7%, signal=34%	SH3BGRL/NUAK1/HOMER2/FXYD2/MST1/MLF1/LINC02532/CCNE2/CREB5/MELTF/FBN2/LRATD2/TFAP2A/TF/GALNT3/SERPINI1/IGDCC3/CRYBG1/AGTR1/COL7A1/CSGALNACT1/PKHD1/GPRC5B/CADPS2/FILIP1L/SOSTDC1/SLC12A2/MOXD1/PAG1/MAP3K20/LYPD6/NMI/NOTCH3/CXCL8/IGFBP7/WLS/GJA1/TNFRSF19/SUSD4/KIRREL1/IL1RAP
KEGG_DNA_REPLICATION	36	-0.671556	-1.83034	0.000571964	0.00383191	0.00245736	5278	tags=64%, list=12%, signal=56%	POLE2/RPA4/LIG1/PRIM2/PRIM1/FEN1/POLA2/POLD1/RFC1/RNASEH2A/MCM7/RFC3/DNA2/RFC5/POLD3/POLA1/MCM2/MCM3/MCM4/POLE/RFC4/MCM6/MCM5
REACTOME_PINK_PARKIN_MEDIATED_MITOPHAGY	22	0.787999	1.86508	0.000573799	0.00383871	0.00246173	4426	tags=68%, list=10%, signal=61%	PINK1/VDAC1/MAP1LC3B/TOMM40/RPS27A/TOMM20/SQSTM1/TOMM5/MAP1LC3A/UBA52/TOMM70/UBB/TOMM6/TOMM22/MFN2
DEURIG_T_CELL_PROLYMPHOCYTIC_LEUKEMIA_DN	315	-0.388977	-1.42312	0.000599656	0.00400597	0.00256899	5595	tags=33%, list=13%, signal=29%	EML4/BAZ2A/INTS6/RDX/TARDBP/C2orf68/CXCR5/PTPRC/EED/BIRC3/PIK3R1/TRAF3IP3/N4BP2L2/MARF1/SNRK/LUZP1/ANKRD49/PMAIP1/OGA/RBM48/STAT3/PPP3CC/WBP11/GGA2/TAB2/TBC1D4/USP47/ZBTB38/BCL2/KDM2A/PPP1R12A/THUMPD1/DCLRE1C/PJA2/ZBED5/HSPA14/CFLAR/TOR1AIP1/TASOR/ARHGEF10/ENOSF1/TGFBR3/TUG1/EOGT/PDE4B/SRSF5/MTMR9/FUBP1/ATXN1/CNOT7/FYN/MAN1A1/NUP58/PPWD1/SEC23A/NKTR/ADRB2/RECQL/SFI1/ARID4B/XCL1/HAUS3/MCM9/MT1X/EN…
LIU_CMYB_TARGETS_UP	163	0.482926	1.57221	0.000603792	0.00402727	0.00258265	5025	tags=39%, list=12%, signal=35%	NQO1/GREB1/GLRX/TACC2/SRD5A1/KCNS3/PDCD4/CITED2/TGFBI/ABTB2/MAP1LC3B/OAT/ACOT7/WDR46/AKAP1/SERPINA3/EPHX1/TIPARP/ESYT1/PRLR/HPCAL1/PRKAR2B/HIGD2A/MAPK3/CTNS/LITAF/PEBP1/SLC31A2/PYGB/EFHD1/TSPAN1/PRAF2/PDK2/ASS1/FHL2/IDS/MT2A/YKT6/OVOL2/MMD/MYO10/RETREG2/GSTM3/IGFBP4/NAB2/CA12/ANKRA2/NOSIP/SH2D4A/BSPRY/WASHC3/CA8/KLHDC2/STK17A/TRPV2/SATB2/RPS6KA2/USP25/ZER1/DLG1/CXCR4/STARD5/DNAJB9/RNGTT
VERRECCHIA_DELAYED_RESPONSE_TO_TGFB1	37	-0.658048	-1.81004	0.000604564	0.00402727	0.00258265	3475	tags=51%, list=8%, signal=47%	NME4/LAMB1/ILK/PAK2/DVL3/TNC/EPHA2/ITGB8/EFNA5/MMP11/FGD1/MMP2/EPHB4/ITGA4/NEO1/COL16A1/SEMA3F/DSP/SMO
BERENJENO_TRANSFORMED_BY_RHOA_DN	398	0.398373	1.40155	0.000606058	0.00403149	0.00258535	4719	tags=33%, list=11%, signal=30%	PDK4/MAOA/GAS6/VDR/ATP6V1A/ATP6V0D1/PDCD4/KLF9/TMEM205/PSAP/GAS5/CPT1A/CYP1B1/TMEM150A/MAP1LC3B/TOM1/SNAI2/EBF3/CYB5A/YPEL3/ACADM/NAXE/COQ9/CLTA/TM7SF3/CTSA/TMEM59/RRAGC/SESN1/SND1/ANXA4/MAPRE3/HEBP1/IDH1/LIPA/GBA/LRP6/SLC1A5/SCP2/F2R/RABAC1/SQSTM1/ST13/TMED3/ST3GAL5/DECR1/EMB/GAMT/CAPN6/MXD4/ALDH1A1/NNMT/GAA/FIBP/GRN/APLP2/PTS/PYGB/GABARAP/STX4/MIEN1/NDRG3/DDIT3/MAP1LC3A/SDHC/CHMP2A/RAB24/BRI3/G…
RAO_BOUND_BY_SALL4	227	-0.421333	-1.49263	0.000610778	0.00405712	0.00260179	5109	tags=34%, list=12%, signal=30%	RYBP/WTAP/DUSP6/ARNT/IRF2BPL/RAX/TLK1/VEGFC/SPRED1/DKK1/SYNCRIP/ZNF280C/KIFC3/ALG11/IL6ST/ITGA1/ZNF148/JARID2/TMEM220/SLC25A40/DYRK3/FRYL/TRIM2/PARP6/SLCO5A1/PDE1A/BCAT1/HNRNPA2B1/B4GALT6/ZFP42/MTMR12/PDGFC/UHRF2/ZNF182/REST/KDM2B/BEND3/SRSF11/SPRY2/MATR3/MGAT4C/MAPK1IP1L/ZNF704/TPD52/PLIN2/MZF1/EYA1/REEP3/ARHGEF18/TP53BP1/LDB1/WEE1/LPAR6/SFTPD/IFITM1/PTGFRN/SLC38A2/STMN1/ETV1/SLCO4C1/MYCN/CFH/ZN…
REACTOME_MITOPHAGY	29	0.726899	1.79955	0.000613201	0.00406745	0.00260841	4631	tags=66%, list=11%, signal=59%	PINK1/VDAC1/MAP1LC3B/TOMM40/RPS27A/PGAM5/TOMM20/SQSTM1/TOMM5/MAP1LC3A/CSNK2B/UBA52/TOMM70/UBB/TOMM6/TOMM22/MFN2/CSNK2A2/FUNDC1
REACTOME_SYNTHESIS_OF_BILE_ACIDS_AND_BILE_SALTS	34	0.706462	1.78467	0.000617916	0.00409293	0.00262475	5026	tags=50%, list=12%, signal=44%	ACOX2/AKR1C2/AKR1C1/BAAT/CYP39A1/OSBPL3/AKR1C3/SCP2/ACOT8/SLC27A5/HSD17B4/CH25H/AKR1D1/OSBP/OSBPL6/CYP27A1/CYP46A1
REACTOME_DNA_REPAIR	329	-0.385488	-1.41625	0.000630179	0.00416826	0.00267306	4520	tags=32%, list=10%, signal=29%	MSH3/ABRAXAS1/PPP4R2/LIG1/WRN/FAAP24/PIAS3/TDG/RNF8/CUL4A/DCLRE1A/POLK/LIG3/H2AC14/OGG1/UBE2I/GTF2H3/INO80D/ACTB/NFRKB/ACTL6A/FANCM/TOP3A/NBN/XRCC5/PNKP/NEIL3/DCLRE1C/RAD9B/FEN1/TINF2/MRE11/SUMO2/EXO1/RAD51D/MAPK8/H2AZ1/XRCC4/ABL1/RIF1/RMI2/POLD1/RFC1/POLM/HMGN1/POLR2A/DCLRE1B/BAZ1B/RAD51/AQR/PAXIP1/FANCC/PARP1/TDP1/RFC3/CLSPN/FANCA/FANCL/BRCA2/XRCC3/POLI/MSH6/RNF168/UBC/RHNO1/POT1/KPNA2/EP300/PA…
WINTER_HYPOXIA_METAGENE	240	-0.409134	-1.45581	0.000638075	0.00421453	0.00270274	3912	tags=33%, list=9%, signal=30%	MIF/HK2/NFKB1/IGFBP2/BACE2/PNN/P4HA2/LRP1/ANGPTL4/STC2/IGF2/SLC16A1/MUC1/SIN3A/PTGS2/HILPDA/ANXA5/POLM/TPI1/CNOT7/COL5A1/TGFB3/IRF6/IGFBP3/KRT19/PFKL/IL6/SGSM2/NFKB2/FABP5/SLC16A2/MET/ALDOA/INSIG1/SRSF6/PIM1/GBE1/CA9/ENPEP/SAT1/TPD52/PLIN2/TF/ENO1/MMP2/EDN1/TNFAIP3/TPBG/PDGFB/PGK1/GAPDH/PKM/EGR1/PLAUR/COL5A2/SERPINB2/VEGFA/CD99/PGF/SLC6A8/PGM1/LDHA/CLK1/ANXA2/SLC2A1/SLC2A3/ALDOC/CDK1/EFNA1/CP/P4H…
CHANDRAN_METASTASIS_DN	313	-0.390862	-1.43042	0.000643105	0.00424178	0.00272021	5688	tags=34%, list=13%, signal=30%	SMOC2/KLK3/C11orf80/PYROXD2/LINC00662/ANTXR2/DPP4/PDPR/TEN1/CAB39L/BTG2/EGR3/MIR100HG/FOSB/GOLM1/CD38/EGR2/B3GALNT1/DEF6/MLLT10/ZMYND11/FAM3B/IDNK/PDE5A/CACNA2D1/IER2/PDZRN4/ARHGAP27/RAMP2/IGFBP2/SYNPO2/TMEM98/PTN/CIRBP/GHDC/AHNAK2/PNRC2/VSIG2/VPS36/ANO7/ITIH5/ARHGEF10/SFRP1/PTGS2/ZNF483/PDE4B/MISP/NFIA/NDNF/CRISPLD2/PDGFC/RAB23/CTSO/ZNF641/CAV2/SLC30A4/BMPR1A/CNTN3/RNF180/ITGB8/ADIRF/TNIP1/LFNG/…
APPEL_IMATINIB_RESPONSE	33	0.704342	1.77372	0.000648341	0.0042703	0.00273849	2732	tags=45%, list=6%, signal=43%	CTSH/FUCA1/APOD/ACP5/ASAH1/CTSA/APOE/ENG/GM2A/OSBPL3/GBA/GNS/HEXA/PLSCR1/NEU1
HU_GENOTOXIC_DAMAGE_4HR	35	-0.677078	-1.83968	0.000649793	0.00427385	0.00274077	2751	tags=49%, list=6%, signal=46%	IFNAR2/CDC20/HLA-A/KPNA2/FAM76B/AURKA/CDT1/NEK2/ECT2/KIF22/TCF19/CDC25C/H2AX/BUB1/ANLN/PTTG1/PRC1
REACTOME_SYNTHESIS_OF_BILE_ACIDS_AND_BILE_SALTS_VIA_7ALPHA_HYDROXYCHOLESTEROL	24	0.748588	1.80033	0.000660266	0.00433664	0.00278104	2756	tags=42%, list=6%, signal=39%	ACOX2/AKR1C2/AKR1C1/BAAT/AKR1C3/SCP2/ACOT8/SLC27A5/HSD17B4/AKR1D1
TORCHIA_TARGETS_OF_EWSR1_FLI1_FUSION_DN	314	-0.391253	-1.43068	0.000666687	0.00437268	0.00280416	5450	tags=37%, list=13%, signal=33%	MEIS1/LTBP1/LGALS1/L3MBTL3/CELF2/PER2/PTPRC/SCML2/PPP1R9A/NDST1/N4BP2L1/RUNX3/ZSCAN18/SOCS5/CPQ/PTPRS/SGPL1/SMIM13/NISCH/SPRED1/GK5/PDE5A/SLAIN1/MAN2A2/MIF/DOCK10/HK2/IFT81/ZNF22/PTPN18/SQOR/TJP2/PANX1/PTPN14/AGPAT2/NCF2/GPR171/ODF3B/LRCH1/SLC38A1/ZC2HC1A/CENPW/HOMER2/LHFPL2/TGFBR3/BAMBI/PDGFD/KCTD14/PDE4B/ADGRA3/ATXN1/FYN/RAPGEF2/HOOK1/NAB1/NUDT12/UBE2D1/SKIL/RPS6KA6/TMEM237/PLXNC1/C11orf95/DENN…
KASLER_HDAC7_TARGETS_1_UP	182	0.474884	1.56785	0.00067915	0.00444198	0.0028486	4898	tags=36%, list=11%, signal=32%	AEN/CLPTM1/POLDIP2/VARS1/SBF1/BPGM/RFTN1/AKAP1/STEAP3/TOMM40/DDX21/FARSA/GM2A/OSBPL3/RAB1B/MRPS2/ST3GAL5/TTC39B/CAP1/PIGT/SMAP2/DGKZ/PIK3CD/GRB2/DAPK3/PIN1/PKP3/UBASH3B/PEX6/B4GALT3/FASN/RASSF3/LRP10/CTU2/GPAA1/MUL1/GLTP/CUTA/HIP1R/LEF1/ABHD8/PCYT1A/DAD1/SHKBP1/TMUB1/RBFA/TSC22D1/TIMMDC1/RNF187/UBXN6/ANKRD9/LMAN2/HDAC5/SLC35A4/FUCA2/RPS6KA1/MRPS11/RITA1/HSPBP1/ZNF707/TRIM35/RARA/ASB6/IDE/SYVN1/SE…
PHONG_TNF_RESPONSE_NOT_VIA_P38	340	-0.381523	-1.40697	0.000679043	0.00444198	0.0028486	5395	tags=36%, list=12%, signal=32%	BHLHE40/TCF7L2/ETS1/PHF11/MANF/ARID5B/PLPP3/BIRC3/GPRC5C/ITGA2/WTAP/RAB11FIP2/PLXNA1/HSP90B1/PRSS23/SEL1L/MYH9/ZNF267/C2CD2/LTB/TUT4/PHACTR4/JUND/SLCO3A1/CD83/NET1/TRIM62/IER2/NFKB1/BCL3/RIPK2/MDFI/UVRAG/P4HA2/PANX1/IL6ST/PARP12/IRF1/NRP2/NBN/PPARG/GRK5/PROX1/CLIP2/LOXL2/CNOT2/SOX9/ATF5/MALL/NR2F1/CFLAR/IFNAR2/BAMBI/DENND5A/ADGRA3/TRAF1/PDIA4/ZBTB10/ABR/CLDN1/TGOLN2/LARP6/CXADR/EGFR/RAPGEF2/ZFP36…
REACTOME_HEDGEHOG_OFF_STATE	113	0.525311	1.64267	0.000700574	0.00457572	0.00293436	4449	tags=46%, list=10%, signal=41%	PSME2/TUBA4A/PSMD8/RPS27A/PSMA7/PRKAR2B/PSME1/PRKACA/PSMD1/PSMB5/PSMB6/PSMD9/TUBB2A/PSMB10/PSMD14/PSMC4/PSMA6/PSMD2/PSMD7/SKP1/PSMA3/UBA52/PSMB4/PSMD13/UBB/PSMB1/PSMA5/PSMD4/ADCY9/PSMC2/PSMA4/PSMB7/PSMA2/PSMD6/PSMB3/PSME3/ADCY4/KIF3A/PSMC3/PSMC1/PSMB2/PSMF1/PSMD11/PSMC6/PSMC5/SEM1/CUL1/PSMD12/DYNC2H1/PSMB8/PSMD3/TUBB4A
REACTOME_METABOLISM_OF_STEROIDS	149	0.505085	1.63804	0.00070606	0.00460513	0.00295322	5519	tags=36%, list=13%, signal=31%	ACOX2/AKR1C2/SC5D/AKR1C1/FDXR/VDR/SRD5A1/HSD17B2/SCAP/BAAT/GPAM/CYP39A1/FDX2/NSDHL/TM7SF2/OSBPL3/AKR1C3/SCP2/AKR1B1/ACOT8/HSD17B14/CYP24A1/SLC27A5/STARD3/HSD17B12/FASN/ARV1/STARD3NL/HSD17B4/CH25H/AKR1D1/MBTPS2/FDX1/DHCR24/MVK/STARD4/IDI1/OSBP/FDFT1/SRD5A3/CYP2R1/OSBPL6/CYP17A1/SERPINA6/SAR1B/CYP27A1/STARD5/SRD5A2/CYP46A1/HSD3B2/PLPP6/DHCR7/PPARA
MARIADASON_REGULATED_BY_HISTONE_ACETYLATION_UP	61	0.612515	1.73206	0.000710119	0.00462515	0.00296606	3678	tags=44%, list=8%, signal=41%	CYP1B1/PRKCD/RETSAT/GNPTG/PDPK1/H1-2/SLC25A16/ABCD3/GGT7/CALCOCO1/GALT/BCL2L1/ID3/TUSC2/AFTPH/SLC2A2/ADSS2/DGKQ/GAK/SBNO1/ISG15/FBH1/DSE/SYNJ1/CHMP4B/PPP1R12C/ACAP3
AMIT_SERUM_RESPONSE_60_MCF10A	58	-0.586059	-1.72186	0.000713114	0.00463821	0.00297444	5395	tags=45%, list=12%, signal=39%	BHLHE40/EGR3/PNRC1/PMAIP1/STK38L/IER2/PIP5K1A/TGIF1/NR4A2/CCL20/PLK2/ZC3H12A/PTGS2/TNC/POT1/FRMD4B/TNFAIP3/EGR1/HBEGF/INHBA/TRIB1/SOX4/CXCL8/ETS2/SCD/TM4SF1
KEGG_PROTEIN_EXPORT	23	0.761017	1.82534	0.000718394	0.00466607	0.0029923	8323	tags=78%, list=19%, signal=63%	SEC11C/OXA1L/HSPA5/SRP14/SPCS1/SEC11A/SRP54/SRPRB/SEC61A1/SEC62/SRP72/SRP19/SPCS3/SEC61A2/SRPRA/SEC61G/IMMP1L/SEC61B
REACTOME_SIGNALING_BY_NOTCH	232	0.446124	1.50783	0.000725761	0.0047074	0.0030188	4846	tags=37%, list=11%, signal=33%	H2AC6/ACTA2/PSME2/PLXND1/H2BC21/H2BC12/PSMD8/ARRB1/H2AJ/WWC1/H2BC4/RPS27A/KAT2A/PSMA7/H2BC5/STAT1/PSME1/PSMD1/PSMB5/H4C8/PSMB6/H2BC8/PSMD9/H3C10/PSMB10/PSMD14/PSMC4/H4-16/NBEA/H2AC19/PSMA6/PSMD2/PSMD7/SKP1/PSMA3/UBA52/PSMB4/PSMD13/UBB/PSMB1/PSMA5/PSMD4/H4C15/PSMC2/PSMA4/PSMB7/CCND1/PSMA2/YBX1/PSMD6/PSMB3/EGF/ST3GAL6/PSME3/PSMC3/H4C5/PSMC1/H2BC15/HIF1A/PSMB2/PSMF1/PSMD11/PSEN2/PSMC6/HDAC10/H2AC18/…
KEGG_VIBRIO_CHOLERAE_INFECTION	53	0.623469	1.71675	0.000735941	0.00476024	0.00305269	3880	tags=43%, list=9%, signal=40%	ATP6V1A/ATP6V0D1/ATP6V1E1/ATP6V0B/ATP6V0A4/ATP6V1H/PRKCA/ATP6V1F/ATP6V1D/ATP6V0E1/ATP6V1B2/ATP6V0C/ATP6AP1/PRKACA/ATP6V1C1/ATP6V0A1/ATP6V1G1/ATP6V1G2/ADCY9/ATP6V0E2/ARF1/SEC61A1/KDELR1
LIU_SOX4_TARGETS_UP	138	-0.46234	-1.53917	0.000735401	0.00476024	0.00305269	5973	tags=45%, list=14%, signal=39%	CLUAP1/DST/TMEM143/STN1/SWAP70/PLPP3/RGPD5/ELAVL4/USP31/MPPE1/PRSS23/COMMD2/RANBP10/TUT4/ADAM10/LASP1/KLHL24/PDE6D/SLC33A1/KIFC3/KBTBD4/STAM/TBL1X/RYK/SOX9/PLK2/LHFPL2/RP2/ARL4D/DENND5A/PPP1CB/PXDN/TMEM184B/EGFR/TLE1/CTTNBP2NL/ELK3/PDE8A/VRK2/MORF4L1/ISG20/DICER1/PTP4A3/ATP2B4/AGO1/WWTR1/MAN2A1/ARHGAP19/THRB/HBEGF/SLC5A3/ZNF281/BMPR2/FAM107B/PRDM2/TUBA1A/ATRX/BTN3A3/SOX4/CD24/TNFSF10/PDGFA
REACTOME_CLATHRIN_MEDIATED_ENDOCYTOSIS	144	0.498353	1.61311	0.00073916	0.00477446	0.00306181	4872	tags=42%, list=11%, signal=37%	APOB/ARRB1/AP2A1/BIN1/VAMP8/GPS1/HSPA8/CLTA/TGFA/RPS27A/VAMP2/WNT5A/NECAP1/VAMP7/RAB5C/AP2S1/NEDD8/EPS15L1/CLTB/DNAJC6/GRB2/AP2M1/SCARB2/UBA52/SYNJ2/COPS5/UBB/ARPC1A/CLTCL1/EPN1/COPS6/COPS8/IGF2R/HIP1R/GAK/SNX18/EGF/CLTC/FNBP1/M6PR/ARPC4/CTTN/SYNJ1/LDLRAP1/CHRM2/COPS3/PACSIN3/COPS4/AREG/UBQLN1/VAMP3/TACR1/COPS2/NECAP2/TFRC/COPS7A/EREG/ARPC3/FCHO1/FCHO2
LI_CISPLATIN_RESISTANCE_DN	33	-0.67247	-1.8048	0.00074152	0.00478311	0.00306736	2845	tags=42%, list=7%, signal=40%	MMP10/ADGRG6/BAMBI/ZFP42/FZD8/MARCKS/DSEL/TES/CFH/PCDH7/MEST/ROBO2/GPC3/CHRDL1
SMID_BREAST_CANCER_RELAPSE_IN_BRAIN_UP	37	-0.652381	-1.79445	0.000750021	0.00483129	0.00309825	3678	tags=43%, list=8%, signal=40%	IMPA2/VGLL1/SFRP1/EGFR/KCNK5/CENPN/WWTR1/MCM10/TMSB15A/MCM5/CENPF/BCL11A/CP/CDH3/PTX3/KIFC1
OHGUCHI_LIVER_HNF4A_TARGETS_UP	50	0.646454	1.77619	0.000754781	0.00485527	0.00311363	3284	tags=38%, list=8%, signal=35%	PDK4/QPCT/EMP2/USP18/SLC25A4/CYP39A1/PSAT1/RCAN2/SULT1E1/VLDLR/ACOT2/PCP4L1/CYP2B6/CTSE/SERPINA7/ANXA13/FMO3/KIAA1324/SLC16A7
REACTOME_MYOGENESIS	27	-0.709894	-1.8317	0.00076138	0.004891	0.00313655	3186	tags=48%, list=7%, signal=45%	CDON/CTNNA2/ABL1/SPAG9/TCF12/TCF4/MAPK14/TCF3/MAP2K6/NEO1/CDH4/MEF2C/CDH2
REACTOME_METABOLISM_OF_STEROID_HORMONES	33	0.699931	1.76261	0.000765459	0.00491047	0.00314903	5061	tags=48%, list=12%, signal=43%	FDXR/SRD5A1/HSD17B2/FDX2/AKR1B1/HSD17B14/STARD3/HSD17B12/STARD3NL/FDX1/STARD4/SRD5A3/CYP17A1/SERPINA6/SRD5A2/HSD3B2
KEGG_FOCAL_ADHESION	198	-0.434336	-1.51825	0.000770201	0.00493413	0.00316421	5370	tags=38%, list=12%, signal=33%	THBS3/ARHGAP5/DOCK1/COMP/BIRC3/PIK3R1/ITGA2/MYL7/AKT1/FLT1/RAF1/VEGFC/ACTG1/COL4A4/AKT3/ROCK1/ITGB4/PIK3R5/PARVA/SHC2/TNXB/BCL2/ACTB/LAMB1/ITGA1/PPP1R12A/BCAR1/MYLK2/ILK/PAK2/CRKL/RAPGEF1/MAPK8/PDGFD/PPP1CB/PDGFC/TNC/FYN/ITGA10/SOS2/COL5A1/EGFR/CAV2/COL4A6/FLT4/ITGA6/COL1A2/ITGB8/MET/COL1A1/SOS1/FLNB/LAMC1/PDGFB/LAMC2/COL5A2/VEGFA/PGF/SRC/PIK3CB/ITGA4/PTEN/PXN/COL3A1/COL2A1/LAMA3/COL4A2/COL11A1/L…
RODWELL_AGING_KIDNEY_DN	145	0.497948	1.60902	0.000777665	0.00497514	0.00319051	4532	tags=30%, list=10%, signal=27%	CLDN8/MPC1/ATP5F1A/KLF9/ABTB2/TMPRSS2/OAT/CYCS/THSD7A/NDUFS1/COX7C/HADHB/ATP5MC3/LDHB/AP5Z1/GOT2/MMUT/PEBP1/PPM1K/BCKDHB/LRPPRC/APLP2/WDR61/PLPPR1/COX7B/PHYH/FMO5/NEDD4L/CCNB1IP1/RHOBTB3/EGF/DBT/FBXO3/SLC16A7/SLC25A36/GABARAPL1/AK2/SOHLH2/FAM83F/CTH/TMEM38B/ISCA1/OXCT1/NEBL
LU_AGING_BRAIN_DN	151	0.492274	1.59621	0.000781446	0.00499251	0.00320165	5448	tags=37%, list=13%, signal=33%	PRKCZ/TSPYL2/NAPA/ATP6V1A/ATP5F1A/TUBA4A/VDAC1/PARM1/FKBP1A/SARS1/ATP6V1H/MRPS12/CALM1/HSPA8/SLC1A1/TIMM17A/PLEKHB2/RASGRF1/MAP1B/CLTB/RAP2A/PITPNA/RBP4/UROS/SMARCA2/CORO1A/ATP6V1G2/RAB3A/TNFRSF21/UBE2M/HCCS/INPP4A/ENSA/DUSP3/PCMT1/MAPK9/TRIM38/NSG1/MRPL28/RAD23A/MAPK1/MBNL2/KLHDC3/RAB1A/FRMPD4/RNF19B/NAPG/E2F4/MTOR/PITPNB/ATP8A1/RPS6KA3/SLC17A7/PPP3R1/MAP2K4/PPM1E
REACTOME_DISORDERS_OF_TRANSMEMBRANE_TRANSPORTERS	175	0.476952	1.56585	0.000782541	0.00499269	0.00320176	4493	tags=37%, list=10%, signal=33%	PSME2/PSMD8/ABCA12/SLC29A3/SLC7A7/SLC27A4/SLC1A1/ABCC2/RPS27A/SLC34A2/PSMA7/ERLEC1/SLC35C1/PSME1/HK1/PSMD1/PSMB5/PSMB6/PSMD9/SLC35A2/PSMB10/PSMD14/PSMC4/SLC3A2/ABCB6/PSMA6/PSMD2/PSMD7/SLC6A3/PSMA3/UBA52/PSMB4/SLC22A5/PSMD13/UBB/PSMB1/PSMA5/PSMD4/PSMC2/PSMA4/PSMB7/SLC2A2/PSMA2/SLC35A1/PSMD6/PSMB3/VCP/OS9/SLC6A2/BSG/PSME3/PSMC3/PSMC1/PSMB2/PSMF1/PSMD11/SLC40A1/NUP88/PSMC6/PSMC5/SEM1/PSMD12/PSMB8/PS…
BROWNE_HCMV_INFECTION_12HR_DN	98	-0.511497	-1.63394	0.000784777	0.00500015	0.00320654	7041	tags=49%, list=16%, signal=41%	MAP3K5/EXOC6B/SIPA1L1/NMT2/PTP4A1/UGCG/PTOV1-AS2/PDGFRA/SNRPA/RUNX1T1/PAIP1/MTCL1/TTLL1/ZNF623/FLRT2/ZMIZ1/RIN2/OGA/AKT3/SERPINB1/CDKN3/MAMLD1/VWA5A/PRIM2/IGF2/SSH1/PTPRR/U2SURP/TRIM2/SPRY1/DENND2B/ATXN1/FYN/TBC1D8/SLF2/CRYBG1/ASXL1/MID1/HNRNPH3/GLI3/PLCE1/ACSL3/SDC2/TUBA1A/SPAG5/UBE2C/NREP/TSPAN5
REACTOME_MITOCHONDRIAL_TRNA_AMINOACYLATION	21	0.759015	1.77923	0.000794025	0.0050522	0.00323992	7436	tags=71%, list=17%, signal=59%	MARS2/IARS2/KARS1/GARS1/EARS2/PARS2/QARS1/LARS2/WARS2/CARS2/NARS2/TARS2/YARS2/HARS2/FARS2
REACTOME_CONDENSATION_OF_PROMETAPHASE_CHROMOSOMES	11	-0.849062	-1.74774	0.000796361	0.00506019	0.00324504	1609	tags=73%, list=4%, signal=70%	CCNB1/NCAPG/NCAPH/SMC4/NCAPD2/SMC2/CCNB2/CDK1
REACTOME_NEUROTRANSMITTER_CLEARANCE	10	0.877701	1.77423	0.000806517	0.00511224	0.00327842	1733	tags=40%, list=4%, signal=38%	MAOA/ALDH2/COMT/SLC6A3
BYSTRYKH_HEMATOPOIESIS_STEM_CELL_AND_BRAIN_QTL_CIS	66	0.591796	1.68783	0.000806736	0.00511224	0.00327842	5023	tags=48%, list=12%, signal=43%	SC5D/RPL26/PRKCE/ACAA1/SPG21/PSMB6/MRPS7/CCND2/ALAD/NDUFA7/SKP1/SNHG6/SCOC/CLEC16A/PRDX2/HARS1/AGTRAP/USP38/CUX1/ALDH9A1/DAP3/ELOA/MRPL44/ZFAND5/DDA1/GEMIN5/NECAP2/ZMYM6/TRMT1/MTIF2/MRPL35/ACADL
VANOEVELEN_MYOGENESIS_SIN3A_TARGETS	220	0.452585	1.51631	0.000811655	0.00512764	0.0032883	5162	tags=37%, list=12%, signal=32%	EDA2R/FTL/TXNRD1/ERGIC1/ATP6V1A/IDH3A/RPSA/ETFB/AHCY/NOP16/RPS24/CCT5/RIOX2/RPS9/VSIR/UCHL3/ARPC1B/SUCLG2/SCAMP2/PTPN1/CNPPD1/ABHD6/COQ10B/PTDSS2/GPC5/MRPS33/MRPS16/TERF2IP/OLA1/MFSD5/GNS/EIF2B1/SLC12A9/CD3EAP/CTU2/COA7/RHBDD2/DPP3/RIPOR1/NOA1/MLYCD/DAP3/CHCHD4/MRPS36/PGLS/PHKB/TRMT6/ENOPH1/RNF13/BLZF1/TBCA/GNL2/MTRF1L/POP7/SURF2/SLC39A3/PPP1R11/VAMP3/DCTD/ANKRD13B/SDC1/RNF181/TAB3/HAX1/GON7/GEMI…
BROWNE_HCMV_INFECTION_48HR_DN	476	-0.353022	-1.33472	0.000813413	0.00512764	0.0032883	5491	tags=30%, list=13%, signal=26%	DPP4/HSPB6/MAP2/PCF11/THBS3/CELF2/PER2/LIMS1/PRR3/MTR/TRAF3IP3/IGFBP5/HAS2/IFT88/PLA2G6/ZSCAN26/CACNA1C/MYB/NORAD/UCP3/PKMYT1/NISCH/ACTG1/EMX2/AKT3/TDRD3/JUND/IFI35/PYY/TGFB1I1/MMP16/SHC2/NFATC4/PTPN21/ACTR1B/ASPH/TAGLN/ADD1/UBE2I/FLT3LG/LAMB1/PPARG/BTBD2/PLCD1/LOXL2/TEP1/CACNA1A/MUC1/PRKAA1/SGSM3/PPP2R3A/TMEM109/RNF41/ITPKA/FARP2/DTNA/DENND2B/RIF1/RAB3B/GABPB1/ZSCAN12/BICRAL/LPP/KAT6B/IGFBP3/SEL…
HINATA_NFKB_TARGETS_FIBROBLAST_UP	81	-0.548296	-1.69777	0.000813547	0.00512764	0.0032883	3960	tags=41%, list=9%, signal=38%	SELE/CD83/NFKB1/EXOSC9/IRF1/IL1B/CCL20/RND3/EGFR/NPAS2/IL6/NFKB2/CCNB1/MYBL1/MMP14/TNFAIP8/EDN1/TNFAIP3/FGF2/IER3/SERPINB2/VEGFA/CXCL6/MTSS1/KDM6A/ARF6/NFKBIA/CXCL1/BTN3A3/CXCL8/PTX3/VIM/CXCL3/CDH2
NADERI_BREAST_CANCER_PROGNOSIS_UP	50	-0.624979	-1.79762	0.000812185	0.00512764	0.0032883	2916	tags=49%, list=7%, signal=46%	HSPA14/FA2H/EXO1/SCLT1/SEMA4C/POLD1/CENPN/MTFR2/TRIM24/SOX11/UHRF1/UBE2T/MYBL2/RACGAP1/CDCA5/NDC80/KIF20A/CEP55/SPAG5/CDCA8/TIMELESS/BUB1/MELK/PTTG1/ASPM
HOEGERKORP_CD44_TARGETS_DIRECT_UP	26	-0.720607	-1.84321	0.000823248	0.00518182	0.00332304	3937	tags=46%, list=9%, signal=42%	PIGA/MLLT3/CFI/IL6/ADRB2/STX1A/AFAP1/MAPK14/ALB/SH3BP2/TYMP/SOX5
BIOCARTA_HSWI_SNF_PATHWAY	12	-0.848207	-1.7868	0.000829891	0.00521661	0.00334536	4832	tags=67%, list=11%, signal=59%	NF1/SMARCB1/ACTB/SMARCD1/SMARCC1/ARID1A/SMARCE1/SMARCC2
DUAN_PRDM5_TARGETS	78	-0.543951	-1.6766	0.000840705	0.00527751	0.00338441	5230	tags=36%, list=12%, signal=32%	EED/GABPA/MYD88/CACNA1C/MYB/PAX6/PIAS3/CLK3/CDC42EP4/MYC/LRRC37A3/TINAGL1/DKK3/APOBEC3B/EVL/PPP1R12B/CD99/NAV2/POU5F1/COL19A1/SOX2/EMID1/NCOA7/PHC1/CDH4/ENO2/NREP/ETS2
BEGUM_TARGETS_OF_PAX3_FOXO1_FUSION_UP	59	-0.584283	-1.72413	0.000848663	0.00532033	0.00341187	5427	tags=49%, list=12%, signal=43%	PERP/LTBP1/GNAS/AUTS2/DPYD/PITX2/EPHA4/NR2F1/KAT6B/MAN1A1/STK17B/PLXNC1/GOLIM4/TUBB1/PCDH17/PBX1/TPBG/TMEFF1/CNR1/MDFIC/PTPRG/DACH1/LMO4/DMD/SEMA3C/PCDH7/ADAMTS1/SLIT2/ADAMTS5
REACTOME_FACTORS_INVOLVED_IN_MEGAKARYOCYTE_DEVELOPMENT_AND_PLATELET_PRODUCTION	161	-0.456554	-1.55893	0.000852383	0.00533651	0.00342225	4590	tags=29%, list=11%, signal=26%	SH2B2/MYB/H3-3A/KIF5B/RCOR1/KDM1A/DOCK10/CENPE/ACTB/IRF1/CARMIL1/ZFPM2/HDAC2/PRKACB/TUBB2B/MAFK/SIN3A/TUBA1C/ABL1/DOCK11/TUBB1/DOCK7/MAFF/KIF12/PHF21A/GATA6/KIF2C/WEE1/DOCK3/CBX5/RACGAP1/EHD2/KIF22/KIF20B/KIF20A/TUBA1A/CDK2/KIF4A/JMJD1C/KIF15/KIF18A/TUBA1B/KIF27/KIF18B/KIFC1/KIF11/H3-3B
SATO_SILENCED_BY_METHYLATION_IN_PANCREATIC_CANCER_1	406	-0.363811	-1.36413	0.000854832	0.0053447	0.0034275	4595	tags=27%, list=11%, signal=24%	ANGPT2/PAX6/PMAIP1/PLEK2/LTB/IL1RAPL2/COL4A3/ROBO3/ULK2/CYP26B1/PARVA/TNF/TMEM176A/RGS17/MCAM/CAMKK2/TJP2/RPL39L/ANKRD26/AHR/IL1B/ZNF165/IGF2/IFIT5/CACNA1A/ENOSF1/APBB2/SFRP1/B4GALT6/EPB41L4A/KCTD14/CCHCR1/PXDN/KLK12/CCNE2/IRF7/DIRAS3/IGFBP3/SERPINA1/COL4A6/SFN/NFKB2/STC1/HEY1/L1TD1/SYN3/ABCC3/IFIH1/HSPA2/ST6GALNAC2/SYT2/CRABP2/CEP162/XCL1/ISG20/NNAT/DAPK1/TRIM36/NRGN/NCOR2/DUSP10/PELI1/SCARA3/CD…
REACTOME_PLATELET_ACTIVATION_SIGNALING_AND_AGGREGATION	259	0.439013	1.49762	0.000864877	0.00540029	0.00346315	2910	tags=22%, list=7%, signal=21%	ADRA2A/GNAI1/GAS6/PRKCZ/RAP1A/TUBA4A/PSAP/DAGLA/ARRB1/PRKCD/F5/PRKCA/SOD1/CALM1/SERPINA3/CYB5R1/PRKCE/APOOL/APOH/PLA2G4A/PDPK1/AAMP/CD9/PTPN1/MAPK3/DAGLB/CHID1/ABHD6/F2R/HSPA5/RHOB/HABP4/CAP1/APLP2/CDC37L1/DGKZ/CD63/PIK3R3/GRB2/RHOG/STX4/OLA1/TEX264/ABCC4/WDR1/VTI1B/RAPGEF3/PFN1/ITPR2/DGKQ/EGF/F2/ABHD12/SERPINA4/TGFB2/STXBP2/A1BG
KEGG_DRUG_METABOLISM_CYTOCHROME_P450	71	0.589723	1.72475	0.000875178	0.00545008	0.00349508	8771	tags=55%, list=20%, signal=44%	CYP2A6/MAOA/ALDH1A3/GSTA2/UGT2B11/GSTP1/UGT1A3/CYP2A7/GSTM4/CYP2B6/FMO5/MGST3/GSTO1/UGT1A1/ADH1C/FMO3/CYP1A2/GSTM3/MGST1/UGT1A6/ALDH3B1/MAOB/GSTA1/GSTK1/CYP2C8/CYP2C9/UGT1A5/GSTM2/CYP3A7/CYP3A5/CYP3A4/GSTA3/CYP2C18/UGT2B17/GSTZ1/UGT1A4/FMO2/AOX1/CYP2E1
ANDERSEN_LIVER_CANCER_KRT19_DN	75	0.57474	1.69428	0.000875178	0.00545008	0.00349508	3676	tags=31%, list=8%, signal=28%	PAPSS2/ACSL5/PEMT/CPT2/BAAT/GPX2/PC/RETSAT/SERPINA3/PRDX6/ADRA1B/EPHX1/AK3/GRHPR/ALDH1A1/ALAD/HADH/ALDOB/MRPS36/SAA4/SLC31A1/CEBPB/KHK
SESTO_RESPONSE_TO_UV_C4	20	0.773854	1.79944	0.000876728	0.00545248	0.00349662	5082	tags=62%, list=12%, signal=55%	ATP12A/ALDH1A3/MPRIP/CD9/ABCD3/IVL/PREP/GGT1/CDK5/ISG15/DDX39A/EFR3A/NMT1
BRACHAT_RESPONSE_TO_CISPLATIN	23	0.755739	1.81268	0.000880009	0.00545866	0.00350058	1224	tags=35%, list=3%, signal=34%	CDKN1A/CCNG1/EI24/YPEL3/SERPINA3/PMM1/MALAT1/MDM2
KYNG_RESPONSE_TO_H2O2	69	0.585829	1.70235	0.000880053	0.00545866	0.00350058	3409	tags=41%, list=8%, signal=37%	C4BPA/GDF15/TUBA4A/RPL7A/CST3/CRYAB/RPL31/TPT1/COX6C/ENG/RPL5/ATP6AP1/IFI6/CD59/TSPAN4/CCNH/PSMC4/DNAJA1/MPV17/CDC34/SLC20A1/PFDN5/TAP1/PPP1CA/CCND1/CUX1/RPL21/EID1
SIMBULAN_PARP1_TARGETS_UP	30	0.700862	1.73686	0.000886569	0.0054918	0.00352183	3098	tags=53%, list=7%, signal=50%	CDKN1A/AK1/CCNG1/CD81/EEF2/FST/IGFBP6/MDM2/CCND2/COL8A1/TIMP2/CCND1/DCN/MGP/IGFBP4/CTTN
REACTOME_INITIATION_OF_NUCLEAR_ENVELOPE_NE_REFORMATION	19	-0.768845	-1.83389	0.000899989	0.00556757	0.00357042	2805	tags=53%, list=6%, signal=49%	LEMD3/VRK1/VRK2/CCNB1/ANKLE2/LBR/CCNB2/CDK1/LMNB1/TMPO
TURASHVILI_BREAST_DUCTAL_CARCINOMA_VS_DUCTAL_NORMAL_DN	197	-0.430694	-1.50287	0.000903619	0.00558265	0.00358009	4896	tags=39%, list=11%, signal=35%	FOSB/USP31/SHISA2/SOCS5/MYBPC1/FAM189A2/SPRED1/PALMD/TCIM/CNN1/GPM6B/ITGB4/CMYA5/LINC01184/KIT/PTPN21/C20orf194/TAGLN/SYNPO2/PTN/PSMA3-AS1/CDRT4/CFAP70/KBTBD6/SOX9/TRAPPC11/KRT17/TRIM2/DSC3/FAM110C/TUBB2B/ENOSF1/IQCA1/SFRP1/RND3/AK5/ATP10D/HOXA3/TTC6/TNC/SF1/EGFR/CAV2/SERPINA1/CFI/RAPGEF2/GATM/ITGB8/MET/VTCN1/MAFF/MAMDC2/RBPMS/TF/NFIB/MICAL3/MID1/LAMC2/SEC14L1/EGR1/PLEKHH2/CCL28/ZNF204P/RAB27A/CT…
TURASHVILI_BREAST_LOBULAR_CARCINOMA_VS_LOBULAR_NORMAL_DN	73	-0.558582	-1.70284	0.000907223	0.00559753	0.00358963	3747	tags=41%, list=9%, signal=38%	LIG3/PABPC1L/LAMB1/RGS1/FBN1/ZNF823/CAP2/TYMS/COL5A1/PDE8A/COL1A2/CTHRC1/COL1A1/TMEM65/MMP11/MMP2/EPPK1/ECT2/COL5A2/CCN4/COL3A1/MXRA5/COL4A2/COL11A1/TACC3/BTN3A3/COL12A1/COL4A1/VCAN/LOX
REACTOME_ABORTIVE_ELONGATION_OF_HIV_1_TRANSCRIPT_IN_THE_ABSENCE_OF_TAT	23	0.75314	1.80644	0.000914183	0.00562887	0.00360973	6403	tags=70%, list=15%, signal=59%	POLR2F/POLR2E/POLR2L/SUPT4H1/POLR2K/POLR2I/POLR2J/SUPT5H/GTF2F2/NELFE/NCBP1/POLR2G/GTF2F1/POLR2D/POLR2H/CTDP1
CHYLA_CBFA2T3_TARGETS_UP	380	-0.372515	-1.39059	0.000914706	0.00562887	0.00360973	4305	tags=28%, list=10%, signal=25%	ESAM/ARHGEF3/CD300LG/CHD9/CTF1/MYO7A/MAP3K15/MCUB/STOX1/RAG1/SPTAN1/SMYD4/SLCO3A1/FBP1/B4GALNT4/SERPINB1/TMEM144/MGAM/BACE1/SOX13/MTF2/NCF2/GPR171/TTC39C/MDGA1/KLF8/RAB11FIP5/ZC2HC1A/ZNF235/SGMS2/GSTM1/ITIH5/SLC4A8/FNDC3B/STOX2/B4GALT6/ANXA5/MISP/ANK3/TRIM45/AATK/GYS1/IRF6/C15orf41/FABP5/PRSS16/ALPK1/RNF180/SOCS2/CFAP57/GOPC/ARID5A/RHOBTB1/HPS3/HOMER3/SLC16A9/PXYLP1/TCIRG1/ARHGEF2/ICA1/ABCG1/RAB2…
REACTOME_HIV_TRANSCRIPTION_INITIATION	47	0.637977	1.7277	0.000919102	0.00564849	0.00362232	6149	tags=57%, list=14%, signal=49%	POLR2F/POLR2E/POLR2L/CCNH/GTF2A2/TAF10/TAF4B/TAF9/POLR2K/GTF2E2/GTF2H1/POLR2I/POLR2J/CDK7/TAF3/TAF12/TAF13/GTF2F2/ERCC2/POLR2G/TAF7L/TAF1L/GTF2B/GTF2F1/POLR2D/TAF11/POLR2H
TAGHAVI_NEOPLASTIC_TRANSFORMATION	12	-0.846455	-1.7831	0.000922615	0.00566265	0.0036314	4896	tags=75%, list=11%, signal=67%	FOSB/RAF1/MAP3K3/AGRN/LPAR2/MCF2L/PDGFB/NEK6/FLNC
LIM_MAMMARY_LUMINAL_MATURE_DN	94	-0.518716	-1.64933	0.000925292	0.00567165	0.00363717	4048	tags=41%, list=9%, signal=38%	RECK/FAM171A1/PRICKLE1/NRTN/BACE2/JAG2/TIAM2/LPL/TGFBR3/SFRP1/B4GALT6/EGFR/IGFBP3/FZD1/FABP5/TINAGL1/NFIB/CASP1/LTBP4/NES/GPX7/ITPKB/MOXD1/COL16A1/LMO4/FAM13A/MEIS2/COL4A2/TLE4/TPST1/SERPINH1/BCL11A/COL4A1/TMEM47/VIM/NREP/KCTD12/EPB41L2/FSTL1
MCBRYAN_PUBERTAL_TGFB1_TARGETS_UP	166	-0.449926	-1.53976	0.000938533	0.00574529	0.0036844	5660	tags=42%, list=13%, signal=36%	DUSP16/CEMIP2/EXTL3/BHLHE40/ETS1/GALC/CYTH1/AKT1/FOXP1/HAS2/IL13RA1/NFIC/EGR2/CNN1/PIAS3/ADAM10/LASP1/NET1/TAGLN/TJP2/PTPN14/TGIF1/LPL/LIPG/SOX9/PRKACB/MAPK8/PDGFC/TNC/UBE2D1/FABP5/SOCS2/CAPG/DKK3/GALNT3/NFIB/MMP14/GUSB/MMP2/MAPK14/CRIM1/COL7A1/WEE1/IER3/SPIN1/FZD6/VEGFA/QKI/COL16A1/SLC2A1/ACAA2/FOXA1/FZD4/MARCKSL1/TGFBR1/SFPQ/CP/SMARCA1/GJA1/ETS2/VCAN/EGLN1/MEF2C/PLOD2/EPB41L2/TNS1/KDR/DPYSL3/CN…
HOLLMANN_APOPTOSIS_VIA_CD40_UP	202	0.457569	1.51658	0.000944252	0.00577276	0.00370201	5117	tags=39%, list=12%, signal=35%	RGCC/ALDH4A1/DEPTOR/IFI30/SLC25A6/ACAT1/ALDH2/PEMT/ISCU/TACC1/GSR/SBF1/CYP39A1/RPS4Y1/TMEM147/RFTN1/PRKCA/EMC7/SDHB/LAP3/CYB5R1/SNU13/LY9/ATP6V1B2/ARPC1B/TSFM/GM2A/PDCD4-AS1/CLTB/MRPL34/TUBB2A/MRPS33/CAP1/MAP4K4/PPP6R1/HMGB3/LSM1/MAGEH1/PEX3/MRPS22/PFDN2/HSPH1/BASP1/COPS6/CUX1/SRP54/ARF3/LEF1/GTPBP6/NQO2/RNF126/ENSA/FOXN3/PCMT1/SYNE1/COPS3/NSG1/PEX1/RUBCN/SHMT1/NBEAL2/ITGB7/COPS2/HSPBP1/TRMT12/FL…
REACTOME_B_WICH_COMPLEX_POSITIVELY_REGULATES_RRNA_EXPRESSION	88	0.541869	1.64561	0.000956602	0.00584064	0.00374554	5420	tags=38%, list=12%, signal=33%	H2AC6/H2BC21/H2BC12/H2AJ/MYBBP1A/POLR2F/H2BC4/POLR2E/DDX21/KAT2A/POLR2L/H2BC5/POLR1D/H4C8/POLR1C/H2BC8/H3C10/H4-16/H2AC19/POLR2K/H4C15/CD3EAP/H4C5/H2BC15/H2AC18/H3C14/H3C1/H2AC8/POLR1E/TAF1D/H2BC7/POLR1B/H4C14
WANG_LMO4_TARGETS_DN	355	0.404298	1.40698	0.000974598	0.00594277	0.00381103	4941	tags=33%, list=11%, signal=30%	PAPSS2/ACTA2/AHRR/AIMP2/PSAP/TMEM192/NDUFAF2/CLPTM1/RPL23/ATP6V1H/TRNP1/VAT1/BAG3/CLTA/NEAT1/ATP6V0E1/KAT14/LURAP1L/PLEKHB2/CCT7/H1-2/EIF5B/ATP6AP1/RPF1/DAGLB/EIF2B4/H4C8/PFDN6/ATP5ME/CDC37L1/THUMPD3/SLC3A2/GPRC5A/AATF/SMAP2/PTS/NAA20/DUSP23/ZNF622/EXOC3/NOL7/SRA1/NBR1/ATP6V1C1/GPATCH4/SPRYD7/GULP1/TMEM178B/C9orf85/TOP1/FHL2/HACL1/MGST3/AHRR/ATG4D/DDX20/RB1CC1/MRPS28/FBXO3/RAB14/FDX1/DUSP3/RPL35A…
REACTOME_ANTIGEN_PROCESSING_UBIQUITINATION_PROTEASOME_DEGRADATION	307	0.416213	1.43858	0.000979793	0.0059595	0.00382176	4846	tags=33%, list=11%, signal=30%	ZBTB16/PSME2/FBXO32/KLHL5/FBXO30/PSMD8/KLHL21/ANAPC13/ELOB/SPSB2/RPS27A/PSMA7/FBXO31/STUB1/RNF123/UBE2D4/FBXO22/PSME1/PSMD1/PSMB5/PSMB6/PSMD9/PSMB10/PSMD14/PSMC4/TRIM4/FBXO2/PSMA6/PSMD2/PSMD7/ELOC/SKP1/PSMA3/SPSB1/UBAC1/UBA52/PSMB4/CDC34/PSMD13/KEAP1/UBB/PSMB1/PSMA5/FBXO27/ANAPC7/UBE2F/PSMD4/GAN/UBE2G2/PSMC2/PSMA4/PSMB7/FBXO44/PSMA2/NEDD4L/UBE2Q1/BTBD1/CBLB/PSMD6/UBE2M/FBXO9/PSMB3/UBE2L3/CUL3/UBE…
TORCHIA_TARGETS_OF_EWSR1_FLI1_FUSION_UP	270	0.419481	1.43467	0.00098116	0.0059595	0.00382176	4719	tags=30%, list=11%, signal=27%	PON3/MACROD2/SRXN1/ZMAT3/ACADSB/MARS2/ACAT1/CDA/PVT1/DCXR/NMNAT2/SLC48A1/MGAT5/GPX2/TSC22D3/PC/SLC25A11/TMEM9B/PRKCE/NEAT1/TGFA/APOE/FOLR1/LYST/BBC3/CD59/F2R/STIM2/MXD4/TTC39B/GRN/NAGLU/RSU1/NBEA/PGAP6/NIBAN2/GRB2/YPEL2/PKP3/ALDH5A1/GRAMD2B/ADCY9/SHANK3/SLC35D2/BEX4/YPEL5/TBCEL/ALOX5/SMIM3/MR1/DIAPH1/MAVS/RFK/ZDHHC9/CTTN/ZNF185/CDC42EP5/S100A13/SLC45A3/ERO1B/ANKRD9/FDFT1/XKR6/CASTOR1/ITGB7/PDLIM5…
GRYDER_PAX3FOXO1_TOP_ENHANCERS	439	0.389175	1.38465	0.000980476	0.0059595	0.00382176	5935	tags=37%, list=14%, signal=32%	RRM2B/ATOH8/TXNRD1/KCNS3/PEMT/IDH3A/ATP6V1E1/INKA2/ALDH1A3/COX5A/TRAP1/PSMD8/SULF2/RPL23A/TOM1/OAT/NDUFS1/UQCR10/RSL1D1/MFSD2A/SARS1/ELMO1/SLC38A10/RBM20/ERRFI1/MRS2/MDH2/CHST11/HS1BP3/HSPG2/RRAGC/BCAR3/ATF6/CA11/AP1B1/PNO1/DDB1/CD9/LRPAP1/SSU72/PARK7/SHB/SCFD2/UQCRC2/STIM2/RASSF4/PCBD1/PSMB6/PEBP1/TBCD/IMMT/PPM1H/PDHB/GRN/CAP1/NAA20/RRAGA/NDUFAB1/ATP5MPL/SLIRP/POR/CHCHD3/GART/WIPI2/COMMD10/STOML…
PURBEY_TARGETS_OF_CTBP1_AND_SATB1_DN	164	0.478073	1.5594	0.000993464	0.00602095	0.00386117	4506	tags=34%, list=10%, signal=31%	PON3/RAP1A/AIMP2/ALDH1B1/SPINK1/P3H2/WDR46/ZMPSTE24/FARSA/ATP6V1B2/PDCD2/PDCD6/TMPRSS4/CBX6/PPIF/SPNS1/ACOXL/SCNN1B/MAP2K2/MDM2/MYO5A/MRPL1/AMZ2/SERINC3/RSU1/ITLN1/SUPT4H1/ACOT8/GCDH/GET3/ATP6V0A1/POLH/HPN/TIMM23/SRPRB/UBXN8/CDC42EP3/EIF3J/ENSA/SERAC1/HACD1/PANX3/ICOSLG/GATC/B3GNT3/POMGNT1/EDC3/HAX1/COPS2/TMEM38B/PDZD11/GLI4/AIFM2/DDX28/ALX1/SCAMP4
IZADPANAH_STEM_CELL_ADIPOSE_VS_BONE_DN	107	-0.50319	-1.61612	0.000993849	0.00602095	0.00386117	4974	tags=40%, list=11%, signal=36%	TMEM245/N4BP2L1/LZTFL1/ZSCAN18/LINC00672/PALMD/RASAL2/PIP5K1A/SERPING1/LAMB1/FBN1/LOXL2/NUAK1/RIMKLB/EHBP1/BCL7A/DAAM1/RGS4/PRKCI/TLE1/DOCK11/HSPA2/MYH10/KDM5B/ATP2B4/NFIB/TCF4/IGF2BP3/PBX1/GPRC5B/COL5A2/AR/PPP4R4/ANXA3/SORBS2/MEST/SMAD1/NPR3/FZD7/PLOD2/LOX/FBLN1/MFAP4
HAHTOLA_MYCOSIS_FUNGOIDES_SKIN_UP	173	-0.443105	-1.52499	0.000997908	0.00603773	0.00387193	4395	tags=35%, list=10%, signal=31%	ERG/KANK2/HNRNPA1/ARPP19/JUND/SPTAN1/ZNF22/MED13/SART3/BACE2/CIRBP/SP3/TRAK2/SF3B1/NUAK1/TRIM2/SSR2/YWHAZ/SAFB/TMEM14A/RGS5/RBM15/PDGFD/DENND5A/PDIA4/RBM25/PPIH/PRKCI/ITGB3BP/IGFBP3/SRRM1/RECQL/MARCKS/FBXO11/TOX/SUZ12/NFIB/TCF4/SATB1/GCA/HNRNPU/CASP1/SREK1/CRIM1/ZNF292/SLC5A3/MRTFB/CFH/CLDN5/RCBTB2/CREB3L2/SOX4/P4HA1/FLNA/BARD1/SERPINF1/SLA/TM4SF1/FBLN1/CNN3
HILLION_HMGA1_TARGETS	90	0.544391	1.66291	0.000999615	0.00604026	0.00387355	4128	tags=36%, list=9%, signal=32%	RPS19/RPS12/SLC25A5/HSPD1/COX5A/COX5B/EEF2/RPL13/SOD1/ATP6V1F/NME1/ATP5PB/RPL11/NME2/RPS3A/RPS17/RPL19/ATP5MC1/COX4I1/RPS11/HSP90AB1/PSMB6/ID3/TIMP2/IGF2R/VCP/RPL21/HRAS/MGST1/TACR1/CFL1/TFRC
AMUNDSON_DNA_DAMAGE_RESPONSE_TP53	16	0.810608	1.82397	0.00100586	0.00607016	0.00389273	5060	tags=75%, list=12%, signal=66%	CDKN1A/CCNG1/PHLDA3/DDB2/MDM2/TNFSF9/TRIM22/PPM1D/XPC/ST14/PLXNB2/CTSD
THUM_SYSTOLIC_HEART_FAILURE_UP	421	-0.358653	-1.34661	0.00100766	0.00607317	0.00389466	5496	tags=31%, list=13%, signal=27%	LAMP1/RNASE1/ST3GAL3/RDX/LMAN1/TATDN3/LRMP/PTPRC/NHSL1/PIK3IP1/SNAP23/AGO4/EIF1/CDC5L/UTP23/ANGPT2/NORAD/HSP90B1/RBM48/ACTG1/NOX4/CD46/RNF125/XPO7/MAT2A/SSBP4/TNFRSF11B/ADAM9/NECAB1/SYPL1/SDC3/ACTB/MSR1/PRPF4B/PTBP2/RASL11B/MYOM3/SLC16A1/EPHA4/RBMS3/LYN/PLK2/ZBED5/YWHAZ/CLIC5/MAP3K7CL/APBB2/BCAT1/SP1/INHBB/PGRMC1/ZNF672/NFIA/MINDY2/PDGFC/SFR1/RGS4/MAN1A1/ST6GAL1/KBTBD2/NONO/DIRAS3/IGFBP3/CFI/ZFP3…
BRUECKNER_TARGETS_OF_MIRLET7A3_UP	108	0.530407	1.63936	0.00100905	0.00607374	0.00389503	4845	tags=43%, list=11%, signal=38%	GLRX/CPEB4/RGCC/ACOX2/SMOC1/TXNRD1/MAGEA2/SH3BP5/CD55/PRDX1/SEC11C/CYP1B1/THSD4/THSD7A/VDAC2/WWC1/COX7C/ERRFI1/SDHA/ATP1B3/LYST/PLA2G4A/TMEM230/PIR/PTS/PGD/MFSD12/CYP24A1/C7orf50/ETV4/PPTC7/OS9/CYSTM1/LRP11/GABARAPL1/ANXA11/CTH/CDK6/GFOD1/IPO7/ARHGAP26/EVA1C/TBC1D15/SLC23A2/POLB/KMO
WEST_ADRENOCORTICAL_TUMOR_MARKERS_UP	22	-0.747459	-1.83168	0.00101192	0.00608323	0.00390111	5090	tags=73%, list=12%, signal=64%	FGFR4/IL32/PMAIP1/UBE2S/IGF2/PDE4B/STC1/DTL/NEK2/RRM2/KIF20A/CDK1/BARD1/PRC1/TOP2A/ASPM
CAVARD_LIVER_CANCER_MALIGNANT_VS_BENIGN	30	0.698953	1.73212	0.0010167	0.00610413	0.00391452	4681	tags=47%, list=11%, signal=42%	AKR1C1/SLC25A5/RPL13A/PRDX1/FST/SPINK1/SPP1/MALAT1/FTH1/GLUL/DUSP22/CES1/CD74/UBD
BIOCARTA_RB_PATHWAY	13	-0.836166	-1.80526	0.00102628	0.00615372	0.00394632	4456	tags=69%, list=10%, signal=62%	CDC25A/RB1/YWHAH/ATM/WEE1/CDC25C/CDK1/CHEK1/CDK2
PID_SYNDECAN_1_PATHWAY	46	-0.624483	-1.7798	0.00103106	0.0061745	0.00395964	2222	tags=41%, list=5%, signal=39%	COL9A1/COL4A3/COL4A4/COL5A1/COL4A6/COL1A2/MET/COL1A1/COL14A1/COL7A1/COL5A2/COL16A1/COL3A1/COL2A1/COL11A1/LAMA5/COL12A1/COL4A1/COL9A2
REACTOME_MITOCHONDRIAL_FATTY_ACID_BETA_OXIDATION_OF_SATURATED_FATTY_ACIDS	11	0.864069	1.78784	0.00103493	0.00618566	0.0039668	2449	tags=73%, list=6%, signal=69%	ACSM3/ECHS1/HADHA/ACADM/MECR/HADHB/ACADVL/HADH
GOTZMANN_EPITHELIAL_TO_MESENCHYMAL_TRANSITION_DN	204	0.45192	1.50109	0.00103557	0.00618566	0.0039668	5302	tags=40%, list=12%, signal=35%	ARHGDIB/CDKN1A/GNAI1/ATP6V1A/TKT/ATP6V1E1/VDAC1/CPT2/CD55/HSD17B10/BAX/AHCY/RPL18/CCT3/ATP5F1B/GSTP1/SOD1/ACADM/BCAP31/ATP5MC1/AMD1/PDCD2/PA2G4/PIGF/PSME1/POLR1D/SLC1A5/SCP2/ABCD3/CNIH1/CYP2J2/SRP14/SLC3A2/OSTF1/SDF2/IVL/ALAD/GSS/DMBT1/COPS5/CALM2/MRPL23/PHYH/ECH1/SDC4/DDX24/HS3ST1/PFN1/GDI2/SLC35A1/HCCS/ARF4/DBP/CD82/UBE2H/STOM/PSMC1/SEPHS2/S100A13/UFD1/STIP1/ANXA11/PIGQ/FDFT1/DYNLT1/HAX1/PSMC5/…
CHUNG_BLISTER_CYTOTOXICITY_UP	134	0.506391	1.62138	0.00105689	0.006305	0.00404333	4963	tags=40%, list=11%, signal=36%	CDKN1A/ALDH6A1/SNX5/ETFB/CD81/COX5A/ACP5/CYB5A/SOD1/CNDP2/CLTA/SDHA/CLPTM1L/CHID1/DDB2/MRPS24/ATOX1/PPP1R7/SMIM12/PSMD14/EHD4/PSMD2/LCMT1/CHCHD3/SLC35B2/PSMD13/PHYH/BOLA2/TIMM23/MED27/SDC4/COPS8/CKS2/CBLB/IRAK1/MICALL1/RFK/GALNT2/GPR137B/DIABLO/PSMC1/PDE4A/PSMB2/NANS/COQ5/SEM1/CUEDC2/RALA/FLVCR2/RAB13/PCK2/THYN1/MIF4GD/TBL2
MATHEW_FANCONI_ANEMIA_GENES	11	-0.841529	-1.73224	0.00107034	0.0063771	0.00408956	4933	tags=82%, list=11%, signal=73%	FANCF/FANCM/FANCC/FANCA/FANCL/BRCA2/FANCG/FANCD2/BRIP1
WIERENGA_STAT5A_TARGETS_UP	201	-0.416571	-1.4609	0.00107315	0.00638574	0.00409511	5620	tags=36%, list=13%, signal=31%	CISH/PLEKHA4/TTLL7/ANTXR2/CIART/FAM241A/BHLHE40/GALC/PLXNA3/RNF217/ITGA2/PIK3IP1/BTG2/IGFBP5/GYPB/CCL2/GNPTAB/FAM131A/LTB/CPXM1/CD83/P2RX4/TJP2/NOD1/P4HA2/SEMA6C/RGS1/CKAP4/POU2F1/BBX/MUC1/TUBB2B/FNDC3B/PHTF2/HILPDA/SLC2A10/TRAF1/GNG2/STK17B/HSPA2/SOCS2/TULP3/PIM1/SOS1/DAPK1/ENC1/ABCA1/PLIN2/IL4R/CERCAM/PGM2L1/KISS1R/COCH/EGR1/CDHR1/FGF11/SPAG4/CFH/A4GALT/PCSK9/TLE4/TRIB1/TGFBR1/SLC2A14/HES6/CXCL…
DAVICIONI_TARGETS_OF_PAX_FOXO1_FUSIONS_UP	256	-0.396456	-1.4201	0.00107812	0.00640715	0.00410884	4431	tags=34%, list=10%, signal=30%	MYH9/VEGFC/TXNDC15/AUTS2/GPM6B/ADAM10/DKK1/TGFB1I1/MMP16/ADD1/PTPRU/NID1/VWA5A/TGIF1/SCN3A/NRP2/UGP2/GAREM1/LOXL2/PDGFD/CARHSP1/DENND2A/SPDL1/PDGFC/PXDN/MARCHF3/COL5A1/CAV2/ELK3/LSP1P4/FZD1/FABP5/PLXNC1/SOCS2/S100A10/GATM/RHOBTB1/MET/FBN2/MAGEL2/DICER1/MAFF/PCSK5/TBC1D9/PCDH17/TPM4/PELI1/APOBEC3B/SATB1/IL4R/EYA1/TNFAIP3/RAB32/TPBG/COL14A1/TMEFF1/CLMN/GRK3/PBK/MYOF/PGF/INHBA/JAKMIP2/ITPKB/COL18A1/…
GU_PDEF_TARGETS_UP	69	-0.568006	-1.7068	0.00108052	0.00641327	0.00411276	2384	tags=39%, list=5%, signal=37%	TNC/COL5A1/FZD8/SERPINA1/COL4A6/FZD1/ITGA6/PLCG1/COL1A1/DKK3/SERPINI1/TCF4/LAMC1/TCF3/LAMC2/SMAD4/COL5A2/VEGFA/PLCE1/COL16A1/SDC2/COL4A2/FZD4/SMAD1/COL4A1/VIM/CDH2
WANG_RESPONSE_TO_GSK3_INHIBITOR_SB216763_UP	377	0.396721	1.38882	0.00108414	0.00642661	0.00412132	5289	tags=29%, list=12%, signal=26%	GLRX/CPEB4/ZMAT3/IFI30/CTSH/SLC25A20/ALDH2/ATP6V1A/PSAP/RPL28/SLC46A3/PRDM1/ELMO1/RPL31/ASAH1/TMEM86A/SIDT2/SNRPN/VWA8/MYO18A/GM2A/PRKAR2B/MALAT1/STXBP1/HPS1/TNFAIP2/ZFAS1/GSTM4/MYO5A/SNHG32/C18orf32/EIF4B/GAA/LETMD1/AMY2B/PIK3R3/PARP9/CLN8/RPL23AP82/ZNF581/SCARB2/ACSF2/GNPDA1/SSBP2/GNS/CAMLG/AHCYL2/EPB41L4A-AS1/GRAMD2B/SLC35D2/TIMP2/IDS/RHOT1/CCNB1IP1/WASHC2A/PSTPIP2/PLSCR1/OTULINL/MR1/NEU1/H2BC…
REACTOME_HIV_TRANSCRIPTION_ELONGATION	43	0.659261	1.74276	0.00108783	0.00644035	0.00413013	6403	tags=56%, list=15%, signal=48%	POLR2F/ELOB/POLR2E/POLR2L/CCNH/SUPT4H1/ELOC/POLR2K/GTF2H1/POLR2I/POLR2J/ELOA/CDK7/SUPT5H/GTF2F2/NELFE/NCBP1/ERCC2/POLR2G/ELL/GTF2F1/POLR2D/POLR2H/CTDP1
VANDESLUIS_COMMD1_TARGETS_GROUP_3_DN	36	-0.657706	-1.79259	0.00109257	0.00646026	0.00414289	5334	tags=47%, list=12%, signal=41%	YJU2/TUBB3/SCG3/DLL3/SERF1A/TRIM9/NR2F1/NRARP/CRABP2/NNAT/PCP4/IGDCC3/TMSB4X/CP/NREP/MFAP4/MFAP2
REACTOME_CLASS_I_MHC_MEDIATED_ANTIGEN_PROCESSING_PRESENTATION	368	0.404505	1.40945	0.00109959	0.00648869	0.00416112	4846	tags=31%, list=11%, signal=28%	ZBTB16/PSME2/FBXO32/KLHL5/FBXO30/PSMD8/KLHL21/ANAPC13/ELOB/VAMP8/SPSB2/RPS27A/BCAP31/PSMA7/FBXO31/STUB1/RNF123/UBE2D4/FBXO22/PSME1/PSMD1/PSMB5/HSPA5/PSMB6/PSMD9/PSMB10/PSMD14/PSMC4/TRIM4/FBXO2/PSMA6/STX4/PSMD2/PSMD7/ELOC/SKP1/PSMA3/SPSB1/UBAC1/UBA52/PSMB4/CDC34/PSMD13/KEAP1/UBB/PSMB1/PSMA5/FBXO27/ANAPC7/UBE2F/PSMD4/GAN/UBE2G2/PSMC2/PSMA4/PSMB7/TAP1/FBXO44/PSMA2/NEDD4L/UBE2Q1/BTBD1/CBLB/PSMD6/UBE2…
CHIARADONNA_NEOPLASTIC_TRANSFORMATION_CDC25_UP	121	-0.488132	-1.59694	0.00110015	0.00648869	0.00416112	4805	tags=40%, list=11%, signal=36%	HAS2/NOCT/CCL2/HSP90B1/TMEM176B/TMEM176A/NPNT/NID1/EFNB2/XDH/IGF2/SLC16A1/PGRMC1/HMGN2/ENAH/ANK3/TNC/SRRT/IL6/OSMR/LOXL1/SRSF6/HNRNPU/EVL/MAN2A1/LXN/PRXL2A/LPAR1/PHLDB2/CXCL6/SLC6A8/SLC38A2/SYNPO/PTEN/NAV2/SLC12A2/PDPN/CEBPD/H2AX/IVNS1ABP/FGFR2/CCNB2/TPST1/GREM2/CDO1/ANP32E/PTX3/ENO2/VCAN
GAUSSMANN_MLL_AF4_FUSION_TARGETS_E_UP	97	-0.513218	-1.63623	0.00110759	0.00652432	0.00418398	5013	tags=38%, list=12%, signal=34%	MEDAG/EGR3/CRIP1/PCDHB4/HAS2/IL13RA1/PMAIP1/MYO1B/NPNT/PTN/BVES/ZC2HC1A/SFRP1/GRB14/SLC1A6/ADGRG2/HEY1/S100A10/CTHRC1/ABCA1/RASL11A/GCA/PPIG/ENPP1/CXCL6/SEMA3B/SORBS2/PDE10A/KDM6A/SORCS2/BEND5/CP/CDH3/NREP/PDGFRL/KCTD12/NTN1
YAGI_AML_WITH_INV_16_TRANSLOCATION	406	0.39499	1.39412	0.00111649	0.0065685	0.00421231	4039	tags=25%, list=9%, signal=23%	ATP12A/GNAI1/H2BC21/CPS1/RPL13A/NT5E/EEF1A1/APOB/RPLP1/RPS18/TACC1/RPS6/RPL23A/FOXO1/RPS16/SEPTIN6/RPL37A/RPS13/AIFM1/RPLP0/RPL13/TST/RPL27A/RPL31/BIN1/SLC38A10/ZMPSTE24/MDH2/HADHB/TPT1/IFRD2/ABCC2/RPL32/RPS27/RPS17/RPL19/ATP6V0E1/KRT13/PABPC1/PPM1G/SPP1/TRIM16/FADS3/CD9/RER1/LRP6/RPS20/RNF167/RPLP2/RABGGTB/IMMT/RPL37/CACNA1D/CLIP3/RPS4X/CCND2/RHBDF1/PSMD7/RBM3/RPS29/TAF4B/PKP3/SRSF8/CBARP/MRPS18…
AMIT_EGF_RESPONSE_60_MCF10A	39	-0.641199	-1.79215	0.00112201	0.00659268	0.00422782	5891	tags=51%, list=14%, signal=44%	GADD45A/ITGB6/RANBP3/BHLHE40/IER2/PLK2/ZC3H12A/RND3/PTGS2/SOWAHC/IL6/MAP3K14/TNFAIP3/TPM1/EGR1/IER3/INHBA/TRIB1/CXCL8/CXCL2
AIGNER_ZEB1_TARGETS	35	-0.665335	-1.80777	0.00112926	0.00662694	0.00424979	3033	tags=46%, list=7%, signal=43%	MUC1/CXADR/SFN/PPL/OCLN/EPPK1/CDH1/TMEM30B/PCDH7/TACSTD2/CDH3/CD24/CDH4/DSP/MPZL2/DSC2
SCHAEFFER_PROSTATE_DEVELOPMENT_6HR_DN	462	-0.356181	-1.34505	0.00114373	0.00670348	0.00429887	5739	tags=35%, list=13%, signal=31%	SPPL3/SPTBN1/SMOC2/TAF1/CEMIP2/SYT13/ZNF274/GATA3/ETS1/ELAVL1/RBM27/GON4L/MANF/QRICH1/L3MBTL3/PPP2R5E/ARID5B/CDC27/ATAD2B/BRD4/VPS54/TXLNA/POFUT1/STRN3/ALDH3B2/APP/ALYREF/HNRNPC/TLK1/HSP90B1/RFWD3/RCOR1/CREBBP/AUTS2/CHD9/SMTNL2/PARVA/MYO1B/LIMA1/PRKCSH/KDM6B/MAP7D1/GTF2H3/TJP2/ZC3H13/MDFI/PDE3A/LRP1/NLGN3/MLLT3/WAC/BTBD2/NR4A2/BCL9/THRAP3/SINHCAF/SSH1/SAP30/KDM3B/RBMS3/SOX9/AGO2/FRYL/ZBTB14/TNRC6…
UEDA_PERIFERAL_CLOCK	169	0.47695	1.56279	0.0011482	0.0067213	0.0043103	3911	tags=37%, list=9%, signal=34%	GLDC/CYP2A6/HTATIP2/HAL/RIPOR2/KLF9/RCL1/CPT1A/TMEM150A/CEBPA/HSPA8/PNKD/GCLC/ARNTL/CD9/HSPA4/H1-2/F2R/TSPAN4/SQSTM1/ST3GAL5/LITAF/TUBB2A/GALT/DNAJA1/PNPLA2/CHP1/RBM3/POR/HMGB3/BRI3/ACOT2/FASN/HSPH1/NR1D1/ASL/MAP2K3/STBD1/SLC2A2/CKS2/UBXN1/LONP2/PLA2G12A/ETHE1/TFPI2/FDX1/ALCAM/HSP90AA1/ATXN2/CEBPB/TSC22D1/IDI1/GABARAPL1/AK2/PSEN2/CREBRF/DNAJB11/CHD4/C6orf89/DYNLL1/SLC29A1/ELOVL5/CES1
HATADA_METHYLATED_IN_LUNG_CANCER_UP	363	-0.3711	-1.38106	0.00117334	0.00685985	0.00439915	5930	tags=29%, list=14%, signal=25%	ZFP69/CYYR1/EPHA5/C3orf62/ZCCHC24/PLEKHF2/MAP4K3/FAF1/CSTF2T/SOWAHA/HSPB6/GATA3/ZNF513/TLL2/MEDAG/TACR3/JPH2/ARHGAP22/ZNF671/RARRES2/BRD9/TRPV4/PRLHR/CACNA1C/KCNJ3/IZUMO1/MT1E/NME4/CNN1/DLEC1/KDM1A/PIK3R5/LRRC3B/GNA14/TGFB1I1/KIT/FBP1/ZNF22/ZBTB47/TAGLN/HLX/NECAB1/CYP2W1/ACTB/ANKLE1/ADAMTSL4/ZNF428/PARP6/IQCA1/BCAT1/PRRC1/SCARF2/RGMA/HDAC7/CFAP410/LRRC34/COL5A1/L1TD1/IGF2-AS/COL1A2/PHF3/ADIRF/TRA…
ONDER_CDH1_TARGETS_1_UP	139	0.504661	1.62344	0.00117595	0.00686658	0.00440346	4823	tags=37%, list=11%, signal=33%	INPP5D/FTL/ZMAT3/KCNMA1/AKR1B10/AKR1C1/ZBTB16/GDF15/ALDH6A1/CD55/KLF9/ALOX15B/EML2/NINJ1/CYP1B1/THSD4/TSC22D3/PRKCA/EPHX1/APOE/GCLC/LRP5/AKR1C3/COQ8A/MDM2/ZNF750/FBXO2/PRKAG2/CD70/NR1D1/PDE4DIP/YIPF2/DBP/LAPTM5/CTTN/MAGED1/GABARAPL1/C9orf16/ABHD4/TP53TG1/CTH/PIDD1/PER1/PRSS8/PCK2/EPHB3/FAM117A/IL15/GID4/RRAS/WIPI1/BHLHE41
CHUANG_OXIDATIVE_STRESS_RESPONSE_UP	28	0.726608	1.78452	0.00118224	0.0068947	0.0044215	1720	tags=39%, list=4%, signal=38%	NQO1/FDXR/GDF15/EPS8L2/FAS/CYP1B1/H19/RCBTB1/LRP6/RPL38/DDIT3
CREIGHTON_ENDOCRINE_THERAPY_RESISTANCE_4	305	0.408793	1.41279	0.00118479	0.00690099	0.00442553	3871	tags=27%, list=9%, signal=25%	TCN1/GREB1/PAPSS2/SERPINA5/HPGD/EMP2/FGD3/SH3BP5/PDCD4/ZNF385B/SLC25A24/RPL28/TTC39A/ZNF703/CYP1B1/CYB5A/TST/H19/SERPINA3/BAG3/MDH2/FKBP5/LYPLAL1/NOP14/TIPARP/NT5DC3/KAT2A/SNHG14/COX6C/SIGMAR1/HPCAL1/HSPA4/GTPBP8/POLR1D/RPH3AL/HMGN3/PPP1R7/COPS9/RUVBL2/PSMG1/NSA2/DFFA/SSTR2/PNMA1/COPRS/BYSL/TSKU/GNPDA1/SLC22A5/EMC8/ADCY9/ASS1/RHBDF2/PARD6B/IRX3/PPP2R5A/MT2A/IRS2/MYO16/RHOBTB3/TECR/DHTKD1/GSTO1/MG…
HADDAD_T_LYMPHOCYTE_AND_NK_PROGENITOR_UP	81	-0.539518	-1.67059	0.00119446	0.00694867	0.00445611	3862	tags=43%, list=9%, signal=39%	BEX1/TJP2/MLLT3/ZNF148/GRK5/ZNF165/PHLPP1/ADGRG6/ANK3/HSPB1/COL5A1/MYH10/BCLAF1/PHF3/HSPA13/TRO/SERPINI1/PBX1/MSH2/ILF3/CAVIN1/MDK/TPM1/DACH1/PTPRD/CFH/LAPTM4B/ASAP2/DDX17/CCDC88A/NPR3/MPDZ/TNFSF10/PLOD2/LOX
GRAHAM_CML_QUIESCENT_VS_CML_DIVIDING_UP	24	-0.726699	-1.83708	0.00120207	0.00698422	0.00447891	3365	tags=52%, list=8%, signal=48%	RGS1/IL1B/CCL20/ANXA5/TRA2B/ZBTB10/PCDH9/CXCL6/CXCL1/CXCL8/CXCL13/CXCL3/CXCL2
YAMAZAKI_TCEB3_TARGETS_DN	197	-0.426713	-1.48897	0.00120684	0.00700022	0.00448916	4466	tags=38%, list=10%, signal=35%	RFX2/MT1E/SPRED1/HNRNPA1/UBE2S/DBF4/ADH5/MIF/CACNA2D1/IGFBP2/AGR2/MTF2/TGIF1/JARID2/XRCC5/SLC25A40/IGF2/SINHCAF/SNRPA1/SAP30/ZMYM1/CACNA1A/TUBB2B/CLDN4/HMGCS1/RIMKLB/LGALS3/ZFP42/ENAH/JADE1/ARL6IP1/GNG2/ULK1/CDCA7L/KRT19/OSBPL1A/PSRC1/ALDOA/DNMT1/PIM1/MT1X/MSH6/KPNA2/NASP/AURKA/FGD1/TPD52/PSIP1/RFC5/UHRF1/NEK2/DSG2/ESCO2/LTBP4/ECT2/LBR/AMIGO3/ALDH7A1/CDH1/MYBL2/COL18A1/G2E3/NECTIN3/KIF20A/SOX2/SI…
LI_WILMS_TUMOR	25	-0.714242	-1.81493	0.00120781	0.00700022	0.00448916	2690	tags=48%, list=6%, signal=45%	INHBB/LYPD1/ADGRG2/SIX1/CRABP2/NNAT/SALL2/EYA1/GLI3/COL2A1/FZD7/CHRDL1
REACTOME_FORMATION_OF_THE_EARLY_ELONGATION_COMPLEX	33	0.690209	1.73813	0.00121902	0.00705643	0.00452521	6403	tags=61%, list=15%, signal=52%	POLR2F/POLR2E/POLR2L/CCNH/SUPT4H1/POLR2K/GTF2H1/POLR2I/POLR2J/CDK7/SUPT5H/GTF2F2/NELFE/NCBP1/ERCC2/POLR2G/GTF2F1/POLR2D/POLR2H/CTDP1
REACTOME_PROTEIN_METHYLATION	17	0.807944	1.84451	0.00123246	0.00712543	0.00456946	3916	tags=59%, list=9%, signal=54%	ETFB/EEF1A1/EEF2/RPS2/CALM1/HSPA8/EEF2KMT/PRMT3/VCP/CAMKMT
PID_TAP63_PATHWAY	54	0.626856	1.73208	0.00125934	0.00727188	0.00466338	1224	tags=28%, list=3%, signal=27%	NQO1/AEN/CDKN1A/FDXR/GDF15/VDR/SPATA18/FAS/BAX/PRKCD/GPX2/NOC2L/BBC3/CLCA2/MDM2
REACTOME_ASSEMBLY_OF_THE_PRE_REPLICATIVE_COMPLEX	68	0.586834	1.70007	0.00127283	0.00734071	0.00470752	4432	tags=60%, list=10%, signal=54%	PSME2/PSMD8/RPS27A/PSMA7/PSME1/PSMD1/PSMB5/PSMB6/PSMD9/PSMB10/PSMD14/PSMC4/PSMA6/PSMD2/PSMD7/PSMA3/UBA52/PSMB4/PSMD13/UBB/PSMB1/PSMA5/PSMD4/PSMC2/PSMA4/PSMB7/PSMA2/PSMD6/PSMB3/PSME3/PSMC3/PSMC1/PSMB2/PSMF1/PSMD11/PSMC6/PSMC5/SEM1/PSMD12/PSMB8/PSMD3
DAUER_STAT3_TARGETS_UP	47	-0.619695	-1.77358	0.00129233	0.00744404	0.00477378	6833	tags=46%, list=16%, signal=39%	IGFBP1/UGCG/GFPT2/FGA/NPC1/PLPP3/PLA2G6/PFKFB3/CCL2/STAT3/BCL3/EFNB2/SLC4A7/FLNB/ABCA1/SLC2A3/CEBPD/TRIB1/SLC2A14/LDLR/EFNA1/KLF11
CHOW_RASSF1_TARGETS_DN	29	0.710057	1.75786	0.00129607	0.00745219	0.00477901	4467	tags=55%, list=10%, signal=50%	CREG1/NINJ1/KLHL21/NDUFS8/LRPAP1/DDB2/EEF1D/PSMG1/POLR2K/EXOSC4/PPP1CA/EBAG9/PTPRN2/INO80B/BST2/OPTN
REACTOME_CYTOCHROME_P450_ARRANGED_BY_SUBSTRATE_TYPE	63	0.5941	1.68296	0.00129693	0.00745219	0.00477901	2967	tags=25%, list=7%, signal=23%	CYP4B1/CYP2A6/FDXR/AHRR/CYP1A1/CYP1B1/CYP39A1/FDX2/CYP2A7/CYP2J2/CYP24A1/POR/CYP2B6/AHRR/CYP1A2/FDX1
HILLION_HMGA1B_TARGETS	91	0.543445	1.66145	0.00130445	0.00747808	0.00479562	3020	tags=40%, list=7%, signal=37%	RPS19/RPS12/SLC25A5/RPL12/CCND3/COX5A/COX5B/ATP5F1B/RPL13/SOD1/CXCL10/NME1/GPX4/ATP5PB/RPL11/RPS3A/ATP5PD/RPL19/ATP5MC1/COX4I1/AK3/ACADVL/RPS11/HSP90AB1/PSMB6/EPHA7/RPL10/RPS4X/PSMA6/PSMB4/ID3/COX7A2/TIMP2/UNC5B/VCP/RPL21
REACTOME_RAB_REGULATION_OF_TRAFFICKING	121	0.505546	1.59488	0.00130463	0.00747808	0.00479562	5495	tags=40%, list=13%, signal=35%	MAP1LC3B/SBF1/TBC1D2/TRAPPC1/GABARAPL2/DENND3/TRAPPC2L/RAB7A/RAB1B/RAB5C/HPS1/ALS2CL/GABARAP/TRAPPC5/TBC1D10A/MON1A/TRAPPC6A/RAB3A/DENND2D/GDI2/TBC1D14/TRAPPC3/RIN1/DENND1A/RAB14/RABEP1/TRAPPC4/RAB9A/TBC1D25/GGA3/RINL/TBC1D7/CCZ1/RAB1A/TRAPPC10/RAB13/TRAPPC12/DENND2C/TRAPPC8/OPTN/TBC1D15/TSC1/RAB11A/TRAPPC9/TBC1D13/GGA1/AKT2/RAB3GAP1
REACTOME_AMYLOID_FIBER_FORMATION	105	0.524332	1.62242	0.00131297	0.00751668	0.00482037	5070	tags=32%, list=12%, signal=29%	SAA1/H2AC6/H2BC21/H2BC12/TGFBI/LTF/CST3/HSPG2/H2BC4/RPS27A/H2BC5/H4C8/H2BC8/H3C10/H4-16/CALCA/H2AC19/UBA52/UBB/APCS/H4C15/H4C5/H2BC15/TSPAN15/LYZ/H2AC18/GGA3/GSN/PSENEN/H3C14/H3C1/H2AC8/GGA1/H2BC7
REACTOME_G0_AND_EARLY_G1	27	-0.694557	-1.79212	0.00133025	0.00760627	0.00487782	4945	tags=56%, list=11%, signal=49%	E2F1/LIN54/CDC25A/RBL2/MYC/CCNE2/LIN9/CDC6/RBL1/DYRK1A/MYBL2/CDK1/CDK2/CCNA2/TOP2A
KIM_MYCN_AMPLIFICATION_TARGETS_DN	105	-0.500844	-1.60387	0.00133358	0.00761603	0.00488408	3938	tags=37%, list=9%, signal=34%	HSD3B7/NET1/TMEM98/CFAP70/LIPG/RASA2/PPP2R3A/CFLAR/CPNE2/ADCY2/KIAA0753/PXDN/TMBIM4/GRB7/RECQL/ITGB8/CEP162/ARID4B/COL1A1/XRN1/ASTE1/APOBEC3B/GCA/DZIP3/CCNL1/FAM111A/ATL3/ZNF738/ATP11B/SLITRK6/CCDC191/FAM107B/PLEKHA5/KLF5/PLEKHA2/PTPRM/BARD1/CCDC14/NDRG1
KOBAYASHI_EGFR_SIGNALING_24HR_UP	102	0.526174	1.62134	0.00134847	0.00769168	0.00493259	4532	tags=40%, list=10%, signal=36%	AKR1B10/H2AC6/MAOA/DEPTOR/CTSH/ALDH6A1/PDCD4/H2BC21/EPB41L1/CYP1B1/ACP5/EDIL3/TSC22D3/EPHX1/SCNN1A/ANXA4/H2BC5/H1-2/H3C10/PSMB10/GRN/CALCOCO1/PIK3R3/ID3/FTH1/ADCY9/ASS1/YPEL5/GLUL/CBLB/ACSL1/S100P/TJP3/WDR45/ABHD4/H2AC18/TP53TG1/GSN/ZNF117/CD74/NEBL
RAY_TUMORIGENESIS_BY_ERBB2_CDC25A_DN	261	0.429792	1.4674	0.00136437	0.00777292	0.00498469	6568	tags=41%, list=15%, signal=35%	SULT1A1/PINK1/VDR/SH3BP5/TMEM54/CPT2/FUCA1/PAQR7/KLF15/EPB41L1/CST3/TSC22D3/MICOS10/EBNA1BP2/ERRFI1/ZMPSTE24/PRDX6/KLHDC7A/TMEM59/ATP5IF1/RRAGC/NDUFS5/BDH1/SCP2/MTFR1L/UQCRH/NNMT/CITED4/PPM1K/LYPLA2/SMIM12/SERINC3/UROD/ELOVL1/DDI2/EFHD1/SLC7A10/DPH2/RBP4/DHRS1/PLEKHF1/MRTO4/HSPH1/CRY2/PHYH/MUL1/ZBTB8OS/URM1/SLC22A4/ARFRP1/PLIN4/TOR3A/IRAK2/SLC6A2/SELENOI/PPCS/CDC42EP3/ACSL1/SLC16A6/RPL22/ALCAM/DH…
OISHI_CHOLANGIOMA_STEM_CELL_LIKE_UP	344	0.40771	1.41968	0.00136924	0.00779122	0.00499642	5679	tags=33%, list=13%, signal=29%	TCTA/ACO2/MCCC1/IARS2/ALDH1B1/FH/NFS1/CERS2/NDUFA10/ANXA9/BPGM/CRYAB/POLR2F/MRS2/WDR3/TIMM17A/PRLR/SNRPN/PPARGC1A/SPP1/NDUFA2/PMM1/SDHD/TMCO1/ITPA/MRPS30/GOT1/TOMM20/TFB2M/POLR1C/PCBD1/PSMB6/SCAMP3/SPTBN5/ATP5MG/AATF/COG2/PTS/WDR12/GABBR1/PCCA/CRP/MRPS16/PCNX2/MRPS14/SDHC/BYSL/SLC22A5/NDUFS2/RANGAP1/TMEM183A/MRPL46/APCS/PEX19/ABCC4/TIMM23/MRPL24/FBXO9/MPC2/XPNPEP3/TGFB2/MRPL2/NDUFB2/SLC30A9/FXR2/…
REACTOME_INTERLEUKIN_12_SIGNALING	47	0.626709	1.69718	0.00138251	0.00785713	0.00503869	4630	tags=46%, list=11%, signal=41%	PSME2/PDCD4/TALDO1/MSN/GSTA2/JAK1/RPLP0/SOD1/BOLA2B/HSPA9/VAMP7/JAK2/PITPNA/BOLA2/TCP1/GSTO1/ARF1/CNN2/PPIA/CFL1/RALA/CAPZA1
REACTOME_FORMATION_OF_TC_NER_PRE_INCISION_COMPLEX	53	0.60914	1.67729	0.00140556	0.00797847	0.00511651	6211	tags=57%, list=14%, signal=49%	POLR2F/GPS1/RPS27A/POLR2E/POLR2L/DDB1/CCNH/UBA52/COPS5/UBB/POLR2K/COPS6/COPS8/GTF2H1/POLR2I/POLR2J/CUL4B/COPS3/COPS4/CDK7/COPS2/PRPF19/COPS7A/ERCC2/POLR2G/ERCC8/POLR2D/POLR2H/XAB2/XPA
SCHOEN_NFKB_SIGNALING	34	-0.651271	-1.74655	0.00141723	0.00803497	0.00515274	6818	tags=53%, list=16%, signal=45%	NUAK2/JAG1/SULF1/BIRC3/IGFBP5/CCL2/IL1B/IL1A/PTGS2/IGFBP3/CTSS/EDN1/HHEX/NFKBIA/TPST1/CXCL8/PTX3/CXCL2
RUTELLA_RESPONSE_TO_CSF2RB_AND_IL4_UP	336	0.408143	1.41612	0.00141987	0.0080402	0.00515609	3062	tags=24%, list=7%, signal=22%	NQO1/CDKN1A/SC5D/KCNMA1/AKR1C1/MAOA/GAS6/SLAMF7/VDR/DEPTOR/ME1/PRDX1/CREG1/CD81/TMEM97/CYP1B1/ACP5/NAT1/JAK1/ATP6V1H/CYB5A/RFTN1/SLC29A3/VAT1/LAMP3/APOE/BCAP31/ATP6V0E1/ATP1B3/GM2A/SPP1/GOT2/CD9/RER1/SCAMP2/GBA/TXN/CD59/PSMB5/SQSTM1/NIT2/ACO1/PIR/LITAF/CREBL2/SLC3A2/CD63/QPRT/PSMG1/MAP4K4/GABBR1/EIF2S1/MDH1/MICAL1/NARS1/ATP6V1C1/KYNU/FTH1/NDUFS2/CLIC2/PDE4DIP/PIGP/PHYH/PVR/ADAMDEC1/CCND1/TRADD/SD…
BOYLAN_MULTIPLE_MYELOMA_PCA1_UP	115	0.506443	1.58533	0.00142907	0.00808255	0.00518325	5184	tags=30%, list=12%, signal=27%	ZBTB16/PLAAT3/TGFBI/SLC25A24/LTF/SERPINA3/LCN2/PRLR/FADS3/OSBPL3/CD9/F2R/NBEA/S100A9/EIF2S3/APOL1/SCART1/BASP1/ARMCX2/LTB4R/PLSCR1/SELENOM/TFEC/ALCAM/CSTA/LYZ/MAGED1/CXCR6/LILRB4/ARMCX3/PAWR/WIPI1/C6orf136/SLFN12/LPAR4
ACEVEDO_NORMAL_TISSUE_ADJACENT_TO_LIVER_TUMOR_UP	172	0.472191	1.54634	0.001435	0.00810145	0.00519537	4345	tags=35%, list=10%, signal=32%	RPL7A/RPL7/RPLP1/GPX2/RPL14/SESN2/RPL23/EMC7/RPL27A/LAP3/FKBP5/RPS3A/SESN1/ZPR1/MYO18A/COX14/CISD1/H1-2/MICU2/DYNLRB1/BLVRB/SORT1/UQCRH/PLA1A/SLC25A51/IGBP1/RNH1/YRDC/FBXO2/C7orf50/SH3YL1/PEX3/PRKAB2/EIF2AK4/FAM98A/MTPN/GAK/SEPTIN11/OS9/SYAP1/SLC17A4/IDO2/UBE2V2/MYCBP2/M6PR/EIF3A/ALCAM/PIK3AP1/MRPL51/DDX27/LMAN2/ALG5/HLA-B/ELOVL5/GTF3C6/DCTN4/APOM/SPIRE1/GORASP1/FRG1
MILI_PSEUDOPODIA_CHEMOTAXIS_DN	423	-0.351824	-1.32135	0.00143588	0.00810145	0.00519537	4512	tags=30%, list=10%, signal=27%	ZMIZ1/SEL1L/CNOT3/SGPL1/OGA/NISCH/PKD1/ZNF562/STT3A/ACVR1/C20orf194/FAM171A1/P2RX4/KDM6B/UBE2I/ANKRD11/P4HA2/IL6ST/ACTL6A/NAGA/LRP1/B4GAT1/TGIF1/PCDH19/SLC11A2/NRP2/BCL9/THRAP3/ATAT1/SLC16A1/ADAMTSL4/GALNT18/CKAP4/GGNBP2/SF3B3/DIDO1/CLCF1/GANAB/LHFPL2/TMEM109/ARHGAP17/HNRNPDL/HMGCS1/COLGALT1/CLSTN1/SLC2A10/SEMA4C/MST1/PLD3/POLG/NONO/COL5A1/PFKL/COL4A6/CCNT2/PDIA3/RBM39/POFUT2/ABCC5/ADRB2/SLC1A4/S…
REACTOME_RETROGRADE_TRANSPORT_AT_THE_TRANS_GOLGI_NETWORK	49	0.629784	1.72371	0.00146343	0.00824698	0.0052887	8376	tags=57%, list=19%, signal=46%	NAPA/COG2/NSF/SYS1/SCOC/ARFRP1/RHOBTB3/IGF2R/RABEPK/M6PR/COG1/RAB9A/VPS53/VAMP3/NAA38/GCC1/NAPG/COG5/STX6/STX10/VPS51/COG4/VTI1A/PLIN3/COG8/RAB6A/RIC1/NAA35
KUMAMOTO_RESPONSE_TO_NUTLIN_3A_DN	10	-0.85684	-1.7181	0.00149706	0.00842637	0.00540374	3541	tags=90%, list=8%, signal=83%	CDKN3/CDC20/CCNB1/KIF2C/KNL1/SPAG5/CENPF/CCNA2/KIFC1
SASAI_RESISTANCE_TO_NEOPLASTIC_TRANSFROMATION	50	-0.609575	-1.75332	0.00151784	0.00853306	0.00547216	4061	tags=44%, list=9%, signal=40%	TGFB1I1/TAGLN/TNFRSF11B/IL6ST/IRF1/FBN1/TGFB3/SELENOP/FBLN5/COL1A1/AMOTL2/MMP11/CDKN2C/EDN1/COL5A2/CACNB3/P3H1/SDC2/CEBPD/ADAMTS1/PLOD2/FSTL1
ZAMORA_NOS2_TARGETS_DN	78	0.549824	1.63188	0.00152864	0.00858345	0.00550448	2972	tags=40%, list=7%, signal=37%	FTL/VDAC1/EIF5A/EEF1A1/APOB/CD81/EEF2/ATP1A1/ATP5F1D/SARS1/AP1B1/ATP6V0C/DDB1/AKR1C3/CD151/MAP2K2/TSPAN4/RABAC1/STARD10/SLC6A13/LONP1/EIF2S2/EIF3B/MGAT1/HPN/CAPNS1/PPP1CA/FKBP3/PPP2R1A/FDX1/PCYT1A
SPIRA_SMOKERS_LUNG_CANCER_DN	15	-0.797647	-1.80036	0.00153092	0.00858597	0.00550609	3651	tags=60%, list=8%, signal=55%	GTF2H3/ZNF611/DCLRE1C/ATP8B1/ZNF160/PRR11/LMO4/ALMS1/TCAF1
REACTOME_KINESINS	60	-0.560133	-1.65428	0.00153616	0.00860506	0.00551833	2848	tags=30%, list=7%, signal=28%	TUBB2B/TUBA1C/TUBB1/KIF12/KIF2C/RACGAP1/KIF22/KIF20B/KIF20A/TUBA1A/KIF4A/KIF15/KIF18A/TUBA1B/KIF27/KIF18B/KIFC1/KIF11
REACTOME_FORMATION_OF_RNA_POL_II_ELONGATION_COMPLEX	58	0.589024	1.64363	0.00153843	0.0086075	0.0055199	6403	tags=50%, list=15%, signal=43%	POLR2F/ELOB/POLR2E/POLR2L/CCNH/WDR61/SUPT4H1/ELOC/POLR2K/GTF2H1/POLR2I/POLR2J/LEO1/ELOA/IWS1/CDK7/CCNK/CTR9/SUPT5H/GTF2F2/NELFE/NCBP1/ERCC2/POLR2G/ELL/GTF2F1/POLR2D/POLR2H/CTDP1
REACTOME_TRANSCRIPTIONAL_REGULATION_BY_RUNX3	96	0.535133	1.62785	0.00155529	0.00868109	0.00556709	4846	tags=53%, list=11%, signal=47%	CDKN1A/PSME2/PSMD8/RPS27A/KAT2A/PSMA7/SPP1/PSME1/PSMD1/PSMB5/MDM2/PSMB6/PSMD9/PSMB10/PSMD14/PSMC4/PSMA6/PSMD2/PSMD7/TEAD4/PSMA3/UBA52/PSMB4/PSMD13/UBB/PSMB1/PSMA5/PSMD4/PSMC2/PSMA4/PSMB7/CCND1/PSMA2/PSMD6/PSMB3/LEF1/PSME3/PSMC3/PSMC1/PSMB2/PSMF1/PSMD11/PSMC6/PSMC5/RBPJ/SEM1/PSMD12/PSMB8/PSMD3/CTNNB1/PSMB9
KANG_IMMORTALIZED_BY_TERT_DN	100	-0.498118	-1.60067	0.0015538	0.00868109	0.00556709	4988	tags=27%, list=11%, signal=24%	EGR3/CCL2/ABCC9/ACYP1/ADAMTS3/GFRA3/NET1/GABRR1/ZFPM2/TGFBR3/RGS5/MYO1D/SMG1/RGS12/MGLL/PDE4D/ZFX/SERPINI1/CASP1/TNFAIP3/CNR1/ZNF236/PDE10A/SVIL/TSPAN5/CKB/CDH2
HADDAD_B_LYMPHOCYTE_PROGENITOR	285	-0.385942	-1.40528	0.00156036	0.00869902	0.00557859	5264	tags=31%, list=12%, signal=28%	LRMP/ARID5B/MEF2A/ZHX2/ATAD2B/FAM193B/BTG2/DACT1/TMCC1/BTN2A1/PLXNA1/TTTY14/AUTS2/PPP3CC/TCL6/GPM6B/CD72/RB1/RAG1/EFHC1/FAM171A1/KMT5B/LILRB2/MDM1/P4HA2/KAT2B/TGIF1/SCN3A/EFNB2/PCBP2/RBM6/PKN2/KDM5D/VSIG10/GSDMB/ADGRA3/PXDN/ZBTB10/COL5A1/TLE1/ELK3/DCK/RIMS3/SOCS2/ISG20/TSPAN14/KIF13A/ZNF160/SPPL2B/ZNF135/TPD52/RFC5/TCF4/ATM/CDKN2C/EZR/CRIM1/TCF3/PCDH9/RRM2/CSGALNACT1/CYFIP2/DDX3Y/KMT2A/DBN1/NID2/…
PID_MTOR_4PATHWAY	69	0.571462	1.6606	0.00157092	0.00874747	0.00560966	5248	tags=49%, list=12%, signal=43%	DEPTOR/PDCD4/EEF2/CYCS/PRKCA/AKT1S1/RRAGC/YWHAB/PDPK1/PPARGC1A/MAPK3/MAP2K2/EIF4B/RRAGA/EIF4E/RHEB/RB1CC1/CLIP1/HRAS/CCNE1/YWHAG/MLST8/MAPK1/RPS6KA1/PLD1/DDIT4/RRAGB/EIF4A1/TSC1/MTOR/EIF4EBP1/ATG13/BNIP3/RHOA
YOSHIMURA_MAPK8_TARGETS_DN	357	0.396855	1.38115	0.00157912	0.00878271	0.00563226	4426	tags=31%, list=10%, signal=28%	ATP12A/PAPSS2/HIGD1A/RPS12/FUCA1/AIMP2/PSAP/COX5A/ABTB2/GPAM/CCT3/CST3/PSAT1/ELOB/NME1/MTCH2/NSDHL/PHB/HSPA8/MDH2/ATP5PB/UQCC2/HADHB/LGALS8/TPT1/TGFA/ATP6V1D/EIF2B5/AMD1/SND1/PDPK1/ATP6V1B2/GRHPR/GM2A/HSPA9/APMAP/LIPA/PFKFB2/SCFD2/IGFBP6/NPTN/ST3GAL5/LITAF/BDNF/RABGGTB/VPS26A/SERINC3/APLP2/WDR61/CHP1/NAA20/NDUFAB1/SNF8/MAPKAPK3/STX4/FMOD/JAK2/ARL5A/PITPNA/MAX/EMC8/ATP5PO/NR2F6/HSPH1/PSMD4/ANKRD24…
BROWNE_HCMV_INFECTION_16HR_DN	83	-0.517595	-1.61211	0.00159266	0.00884747	0.00567379	2724	tags=29%, list=6%, signal=27%	TGFBR3/DIP2C/ZFP36L2/COL1A2/ADIRF/COL1A1/RBPMS/ATP2B4/PBX1/TPM1/FGF2/MAP2K6/FILIP1L/PDLIM7/ACAA2/DCLK1/SERPINH1/SLIT2/SVIL/UBE2C/PTX3/GJA1/SEMA3A/CHN1
CUI_TCF21_TARGETS_UP	36	-0.64583	-1.76023	0.0016056	0.00890879	0.00571311	3605	tags=44%, list=8%, signal=41%	IGFBP2/PTN/EPHA4/HOMER2/LHFPL2/HMMR/SOX11/MDK/RBP1/CFH/COL3A1/PHGDH/SERPINF1/CADM1/HJURP/VCAN
PURBEY_TARGETS_OF_CTBP1_NOT_SATB1_UP	293	0.410854	1.41442	0.00163408	0.00905243	0.00580522	4622	tags=31%, list=11%, signal=28%	ATP12A/SAA1/NMU/INPP5D/ACTA2/GDF15/HAPLN1/G6PD/BAX/SV2B/GPAM/ALDH1B1/SUCLG1/CST3/RFTN1/SNX8/BIN1/EBNA1BP2/BORCS6/PAPPA/H2BC5/PNO1/YIPF1/PPIF/CXCL16/PAH/LITAF/FAU/IMMT/JAGN1/PRKAG2/RBM3/MRPS34/LMCD1/GDE1/PPP6R1/LRATD1/SKP1/COMMD10/CCDC85B/B3GAT1/KPNA1/ACOT2/SLC35F6/PDCD5/UBE2G2/CHCHD6/NDFIP1/PPP2R5A/UQCRC1/MUC20/PFN1/ARFRP1/CAPZB/PARL/MARK3/TMEM242/SPATC1L/TRMT6/C19orf47/ENSA/PPM1D/FPGS/PTRH2/ARF1…
GENTILE_UV_RESPONSE_CLUSTER_D8	37	-0.635895	-1.7491	0.00163535	0.00905243	0.00580522	6082	tags=54%, list=14%, signal=47%	HMGCR/CDYL/ZCCHC24/IRS1/TAB2/PPP1R12A/FYN/SPRED2/MARCKS/PARP1/INSIG1/MT1X/MAPK14/STK24/HNRNPH3/HMGN4/RBM15B/NREP/TOP2A/TSPAN5
JAIN_NFKB_SIGNALING	74	0.565377	1.66298	0.001661	0.00918058	0.00588741	6793	tags=57%, list=16%, signal=48%	APRT/BCAT2/UCHL3/TM7SF2/NOC2L/GBA/ALG3/ITPA/DECR1/SPHK2/ASCC3/PSMG1/JAK2/GATB/CLUH/TPD52L2/PSMA2/LIG4/ARMC6/SMG7/RIDA/ZNRD2/LMAN2/SLC29A1/RAD50/FBL/LAS1L/HDDC2/SYMPK/TRMT1/PEX14/SLC23A2/PAWR/PREPL/BNIP3/ORC5/TAP2/NAP1L1/PLAU/PSPH/CTSC/ZNF415
PEREZ_TP53_AND_TP63_TARGETS	208	-0.411197	-1.45038	0.00166242	0.00918058	0.00588741	4407	tags=29%, list=10%, signal=26%	OGA/PALMD/AUTS2/GPR37/RASEF/HIC2/CNNM4/CGNL1/GRK5/NPIPA1/PLCD1/IGF2/RBM38/FOXF2/RAB11FIP4/NUAK1/COL27A1/SMAD9/BAMBI/STOX2/CRISPLD2/MARCHF3/ULK1/IGFBP3/SELENOP/RTN4R/FZD1/FRY/NRARP/GOLGA6L5P/PCSK5/TOX/CNKSR3/HUNK/REEP1/PGAP1/KISS1R/WNT7B/CGAS/FOXP4/GRTP1/EPPK1/KSR1/EGR1/ZNF436/LRRC37A4P/TRIM8/PGF/MOXD1/COL18A1/APAF1/MXRA5/NOTCH3/EVPL/SLIT2/PTX3/CHST2/CDKN1C/NTN1/CKB
SMID_BREAST_CANCER_ERBB2_UP	139	0.498397	1.60329	0.0016926	0.00932523	0.00598017	3530	tags=27%, list=8%, signal=25%	NQO1/PAPSS2/AKR1B10/ALDH4A1/G6PD/EIF5A/APOD/TMPRSS2/UGT2B11/ABCA12/MPHOSPH6/HPX/ABCC2/SCNN1A/TM7SF2/PNMT/CLCA2/TRPV6/GOT1/SQSTM1/S100A9/QPRT/CORO1B/TSPAN1/STARD3/TSKU/KYNU/FASN/ASS1/GCAT/IGF2R/UBE2M/GGT1/ACSL1/ALCAM/SNPH/RRP7A/ATP2C2
KAN_RESPONSE_TO_ARSENIC_TRIOXIDE	121	-0.481449	-1.57507	0.0016909	0.00932523	0.00598017	4359	tags=40%, list=10%, signal=37%	MT1E/FAM162A/GPM6B/DKK1/ZNF512B/SCG2/PTN/EFNB2/STC2/PLK2/PTHLH/KLF12/DCBLD2/RGS4/DIRAS3/CAV2/PPP1R15A/STC1/HEY1/SOCS2/MCM7/INSIG1/MT1F/MT1X/MYBL1/IGF2BP3/SPC25/FBXO5/RRM2/NES/PIMREG/SLC2A3/KIF20A/SOX2/PHGDH/LDLR/LMNB1/DLGAP5/CXCL8/ENO2/ARL4C/TOP2A/VCAN/SCD/GPNMB/NDRG1/KCTD12/PTPRZ1/DPYSL3
MARIADASON_RESPONSE_TO_BUTYRATE_SULINDAC_6	47	-0.613649	-1.75628	0.00170666	0.00939166	0.00602277	3977	tags=47%, list=9%, signal=43%	SCAF11/KMT5B/MDGA1/NCBP3/RPRD2/CDK5RAP2/RNF180/SESTD1/KHDRBS1/IFITM2/RFX7/MAZ/SORBS2/TIA1/SMC2/HNRNPH1/TMPO/HMGB2/CTDSP1/MAPK4/ETS2/NSD2
HELLER_HDAC_TARGETS_SILENCED_BY_METHYLATION_UP	452	0.380997	1.35929	0.00172492	0.00948099	0.00608006	5448	tags=32%, list=13%, signal=28%	CDKN1A/FTL/HPGD/ZMAT3/GLDC/ALDH4A1/H2AC6/FDXR/ACADSB/G6PD/CYP1A1/ALDH2/ATP6V0D1/APLP1/H2BC21/FUCA1/ALDH1A3/PSAP/MAGEA4/ABTB2/CYP1B1/NAT1/OAT/ACOT7/TST/BIN1/CALM1/LAMP3/H2BC4/APOE/ATP6V1D/KLF2/RRBP1/POLR2L/MAPRE3/AP5Z1/NCAM1/GM2A/SPP1/STAT1/CD9/AKR1C3/H1-2/PRKAR2B/HK1/IFI6/SCP2/H4C8/RPS20/SQSTM1/RHOB/NIPAL3/H2BC8/SORT1/HABP4/TUBB2A/EPAS1/H3C10/GRN/APLP2/BAIAP2/PIK3CD/DZIP1/ATP13A2/MFSD12/POR/KATNB…
REACTOME_ENERGY_DEPENDENT_REGULATION_OF_MTOR_BY_LKB1_AMPK	29	0.703373	1.74131	0.00174196	0.00954318	0.00611994	6324	tags=69%, list=15%, signal=59%	RRAGC/LAMTOR3/RRAGA/LAMTOR5/PRKAG2/LAMTOR1/PRKAB2/RHEB/LAMTOR4/PRKAG1/STK11/CAB39/MLST8/SLC38A9/LAMTOR2/RRAGB/TSC1/MTOR/PRKAB1/TSC2
LEE_RECENT_THYMIC_EMIGRANT	229	-0.402569	-1.42142	0.00174235	0.00954318	0.00611994	3912	tags=34%, list=9%, signal=31%	MIF/SERF1A/GTF2H3/ZNF776/NEDD1/NR4A2/RGS1/GPR171/THRAP3/KBTBD6/ANKRD37/RASA2/HDAC2/TMOD3/DENND5A/TYMS/DARS1/RSAD2/TRA2B/LPP/MINDY2/PXDN/KLHL8/SPRED2/HACE1/CDCA7L/MBTD1/STK17B/IFT80/PDE4D/MARCKS/PGM2/MAML3/SPRY2/CBL/BTBD3/DAPK1/TOX/TMEM65/NSD3/CEP57/RNF138/TCF4/LCORL/IGF2BP3/ZNF677/TNFAIP3/CASC15/RBM7/SENP7/DSG2/PDLIM1/GNB4/PM20D2/ING3/CDCA7/NINL/CACHD1/ZBTB21/CENPK/ZNF738/PCLAF/RAI1/NFKBIZ/ANKRD1…
REACTOME_REGULATION_OF_COMMISSURAL_AXON_PATHFINDING_BY_SLIT_AND_ROBO	10	-0.854412	-1.71323	0.00174148	0.00954318	0.00611994	2052	tags=60%, list=5%, signal=57%	ROBO3/ROBO1/SRC/SLIT2/ROBO2/NTN1
MOHANKUMAR_HOXA1_TARGETS_UP	408	0.38598	1.36337	0.00176183	0.00962594	0.00617301	4481	tags=33%, list=10%, signal=30%	HTATIP2/G6PD/CYP1A1/IDH3A/WDR77/CPT2/PLAAT3/SLC39A8/EEF1A1/IARS2/CLPTM1/ABTB2/TRAP1/ADIPOR1/TMEM38A/SULF2/ARRB1/OAT/NOTCH2NLA/WDR46/ZMPSTE24/TOMM40/HSPA8/HADHB/DNAJA3/UBL3/BCAT2/ATP1B3/TIMM17A/LDHB/AMD1/PRLR/SCNN1A/SPG21/ARPC1B/CS/AP1M2/RAB1B/H1-2/ARMT1/ATP6AP1/ACADVL/TXNDC11/PSMB5/FARSB/ABCD3/SQSTM1/NPTN/RHOB/LITAF/TM9SF2/PRDX3/PIP4K2A/CCT6A/EPAS1/PLPP2/ALG8/GPN3/SLC35B1/CCT8/QPRT/GRB2/DUSP14/RP…
ZHANG_RESPONSE_TO_IKK_INHIBITOR_AND_TNF_UP	221	-0.405065	-1.43437	0.00176363	0.00962594	0.00617301	5660	tags=37%, list=13%, signal=32%	DUSP16/GRHL3/GPR132/B4GALT5/C15orf48/IL23A/ETS1/CYTH1/BIRC3/BTG2/IL32/GBP3/BTN2A1/HIVEP1/PNRC1/ZNF697/TCIM/SLCO3A1/CD83/SERPINB1/ANKRD22/CDC42EP4/NFKB1/BCL3/RIPK2/IRF1/KDM2A/IL1B/TIAM2/ZNF165/RTKN/CCL20/LYN/IL1A/MMP10/ZC3H12A/SEMA4C/TRAF1/CLDN1/ZC3H12C/IRF6/NFKB2/IFIH1/MFHAS1/ITGB8/TMCC3/TNIP1/ISG20/RAB3IP/MAFF/AMOTL2/GLS/PELI1/CLDN18/TNFAIP8/FRMD4B/EDN1/TNFAIP3/LPAR6/PLAUR/HBEGF/DRAM1/INHBA/NFKB…
NIKOLSKY_BREAST_CANCER_19Q13.1_AMPLICON	22	-0.73348	-1.79742	0.00176362	0.00962594	0.00617301	6623	tags=59%, list=15%, signal=50%	ZNF540/ZNF529/ZNF570/ZNF569/ZNF793/ZNF568/ZNF420/ZNF461/ZFP30/ZNF829/ZNF345/ZNF567/ZNF260
REACTOME_RNA_POLYMERASE_III_TRANSCRIPTION_INITIATION_FROM_TYPE_1_PROMOTER	28	0.717536	1.76224	0.00179426	0.00977035	0.00626562	6149	tags=54%, list=14%, signal=46%	POLR2F/POLR3H/POLR2E/GTF3A/POLR2L/POLR1D/POLR1C/POLR2K/POLR3E/GTF3C6/POLR3K/POLR3D/POLR3B/POLR3A/POLR2H
REACTOME_SIGNALING_BY_HEDGEHOG	150	0.478232	1.55049	0.00179279	0.00977035	0.00626562	4449	tags=40%, list=10%, signal=36%	PSME2/TUBA4A/PSMD8/ARRB1/RPS27A/PSMA7/ERLEC1/PRKAR2B/PSME1/PRKACA/PSMD1/PSMB5/PSMB6/PSMD9/GPC5/TUBB2A/PSMB10/PSMD14/PSMC4/DZIP1/PSMA6/PSMD2/PSMD7/SKP1/PSMA3/UBA52/PSMB4/PSMD13/UBB/PSMB1/PSMA5/PSMD4/ADCY9/PSMC2/PSMA4/PSMB7/PSMA2/PSMD6/PSMB3/VCP/OS9/CUL3/PSME3/ADCY4/KIF3A/PSMC3/PSMC1/PSMB2/PSMF1/PSMD11/DISP2/PSMC6/PSMC5/SEM1/CUL1/PSMD12/DYNC2H1/PSMB8/PSMD3/TUBB4A
YANG_BREAST_CANCER_ESR1_DN	25	-0.704768	-1.79086	0.00179697	0.00977379	0.00626783	3045	tags=56%, list=7%, signal=52%	SLC9A6/TRIM2/SFRP1/FABP5/YEATS2/SOX11/LBR/TLE4/CENPF/PROM1/BCL11A/CYB5R2/CDH3/MFAP2
REACTOME_PHENYLALANINE_AND_TYROSINE_METABOLISM	11	0.851774	1.7624	0.00182687	0.00992484	0.00636469	1268	tags=45%, list=3%, signal=44%	TAT/FAH/QDPR/PAH/PCBD1
LIEN_BREAST_CARCINOMA_METAPLASTIC	33	-0.644513	-1.72976	0.00183507	0.00995785	0.00638586	6002	tags=52%, list=14%, signal=44%	PDGFRA/RUNX1T1/RARRES2/MMP16/MCAM/PPP1R12A/IGF2/TMEM217/STAG2/IQCA1/TPM4/PKD2/COL18A1/COL16A1/SPARC/ADAMTS5/PDGFA
REACTOME_TRAFFICKING_OF_AMPA_RECEPTORS	31	0.692482	1.71881	0.00183785	0.0099614	0.00638814	1766	tags=26%, list=4%, signal=25%	EPB41L1/CAMK2G/AP2A1/PRKCA/AP2S1/MDM2/AP2M1/NSF
KEGG_SPLICEOSOME	127	-0.466623	-1.54247	0.001844	0.0099832	0.00640212	6845	tags=46%, list=16%, signal=39%	SNW1/CRNKL1/SF3A1/SMNDC1/SRSF7/TCERG1/SNRNP200/CDC40/PHF5A/SF3A2/DHX38/ISY1/SNRPA/DDX23/THOC2/DDX42/ACIN1/ALYREF/CDC5L/PRPF38B/HNRNPC/DDX5/HNRNPA1/WBP11/RBM22/LSM2/PCBP1/SNRPA1/DHX15/RBM8A/SF3B1/U2SURP/SF3B3/DDX39B/PRPF8/SRSF2/SNRNP40/TRA2B/PRPF3/SRSF5/HNRNPA1L2/RBM25/PPIH/AQR/HNRNPA3/HNRNPK/HSPA2/LSM6/SRSF10/HNRNPM/SRSF1/SRSF6/RBM17/SRSF4/THOC1/HNRNPU/TRA2A/PRPF38A/RBMX
PHONG_TNF_RESPONSE_VIA_P38_PARTIAL	163	-0.442354	-1.51562	0.0018569	0.0100414	0.00643945	4306	tags=36%, list=10%, signal=33%	KANK2/STAT3/TCIM/DKK1/FGD6/DLEU1/KDM6B/IL6ST/EFNB2/NBN/PITX2/CCL20/PLK2/PTHLH/TUBB2B/FNDC3B/TNC/EGFR/REL/IL6/AGRN/NFKB2/HEY1/MFHAS1/CREB1/INSIG1/MAFF/TGIF2/AURKA/DUSP10/IL4R/LAMC1/DNAJB4/TNFAIP3/COL7A1/IER3/PDE8B/PLAUR/LHFPL6/SLC5A3/SERPINB2/INHBA/TRIB2/MCL1/BAZ1A/SEMA3C/CEBPD/TPST1/PCDH7/HEXIM1/CXCL1/LDLR/BMP5/CXCL8/FZD7/PTX3/CXCL3/CXCL2/ZNF395
REACTOME_TRANSPORT_OF_THE_SLBP_DEPENDANT_MATURE_MRNA	36	-0.641904	-1.74953	0.00187161	0.0101093	0.00648298	7167	tags=53%, list=16%, signal=44%	NUP35/POM121/SLBP/AAAS/NUP93/POM121C/ALYREF/NUP85/NUP37/NXF1/NUP160/NUP58/NUP54/NUP153/NUP62/TPR/NUP107/NUP210/NDC1
REACTOME_REGULATION_OF_GLUCOKINASE_BY_GLUCOKINASE_REGULATORY_PROTEIN	32	-0.660576	-1.76764	0.0018928	0.010212	0.00654882	7167	tags=50%, list=16%, signal=42%	NUP35/POM121/AAAS/NUP93/POM121C/NUP85/NUP37/NUP160/NUP58/NUP54/NUP153/NUP62/TPR/NUP107/NUP210/NDC1
YAO_TEMPORAL_RESPONSE_TO_PROGESTERONE_CLUSTER_15	35	-0.652142	-1.77192	0.00189517	0.010213	0.00654947	2052	tags=40%, list=5%, signal=38%	ROBO1/COL14A1/SEPTIN10/PTPRD/PCLAF/STMN1/KIF22/SEMA3C/SEMA3B/SLC15A2/MKI67/CDK1/BIRC5/AURKB
REACTOME_CELL_CELL_JUNCTION_ORGANIZATION	63	-0.567108	-1.69355	0.00191162	0.0102898	0.00659873	4724	tags=40%, list=11%, signal=35%	CLDN12/MPP5/ACTG1/CLDN10/ACTB/CTNND1/CLDN4/CLDN1/PRKCI/AFDN/ANG/CLDN18/NECTIN1/SDK1/CDH1/CDH24/NECTIN3/CLDN5/CDH3/CDH7/CDH4/CDH10/CLDN3/CADM1/CDH2
PID_E2F_PATHWAY	73	-0.539272	-1.64398	0.00193527	0.0104051	0.0066727	4456	tags=47%, list=10%, signal=42%	CDC25A/RBL2/CREBBP/RB1/KAT2B/MYC/SP1/TRRAP/TYMS/CCNE2/SIRT1/ORC1/EP300/RRM1/BRCA1/CDC6/ATM/E2F2/CDKN2C/POLA1/RRM2/RBL1/TOPBP1/MCM3/CBX5/MYBL2/APAF1/CDKN2A/MCL1/CDK1/E2F7/CDK2/TK1/CCNA2
REACTOME_UREA_CYCLE	10	0.858389	1.73519	0.00194711	0.0104568	0.00670584	2467	tags=50%, list=6%, signal=47%	CPS1/SLC25A15/ASL/ASS1/NMRAL1
FARMER_BREAST_CANCER_APOCRINE_VS_LUMINAL	322	0.405794	1.40634	0.00195406	0.0104821	0.00672205	4932	tags=35%, list=11%, signal=31%	CLDN8/GREB1/PAPSS2/SERPINA5/ACAD8/KCNMA1/ECHDC1/AKR1B10/TACC2/MAOA/G6PD/SRD5A1/HSD17B2/TUBA4A/PLAAT3/ETFB/MCCC1/KRT7/ALDH1A3/APOD/TMPRSS2/UGT2B11/ABCA12/ANXA9/ACOT7/CYB5A/ETFA/STEAP3/RIOX2/ACADM/MPHOSPH6/FKBP5/UCHL3/IDH1/GGTLC1/RNF24/NAAA/CLCA2/TRPV6/PPIF/PRKAR2B/MDM2/GALE/COMT/APLP2/CYP2J2/SMCO4/S100A9/QPRT/VLDLR/BAG1/EFHD1/DUSP14/PNMA1/NBR1/TSPAN3/HEBP2/KYNU/PEX3/NBPF10/CCDC6/PI3/FASN/ASS1/MTFR…
REACTOME_INTERLEUKIN_12_FAMILY_SIGNALING	57	0.595886	1.65663	0.00196331	0.0105197	0.00674616	4630	tags=41%, list=11%, signal=37%	PSME2/PDCD4/TALDO1/MSN/GSTA2/JAK1/RPLP0/SOD1/BOLA2B/HSPA9/STAT1/VAMP7/JAK2/PITPNA/CRLF1/BOLA2/TCP1/GSTO1/ARF1/CNN2/PPIA/CFL1/RALA/CAPZA1
WONG_EMBRYONIC_STEM_CELL_CORE	334	0.40012	1.38849	0.00199857	0.0106963	0.00685945	3576	tags=36%, list=8%, signal=34%	ACAD8/GLDC/RPS5/RPS19/LYPLA1/RPS12/SLC25A5/WDR77/SNX5/RPSA/UQCR11/PRDX1/ECHS1/MRPL15/COX5B/EEF2/BAX/FH/CYCS/RPS23/RPS16/SARS1/CCT5/MRPL4/EIF3K/RPL13/HSPE1/POLR2F/RPL27A/EBNA1BP2/EIF3I/ETFA/MRPL12/PHB/ATP5PF/TIMM8B/NME2/RPS3/RPS27/PSMA7/RPS8/FARSA/TIMM13/GARS1/PABPC1/RPL10A/NDUFB8/EIF6/PPM1G/MRPL37/BTF3/NIFK/PDCD2/HSPA9/CISD1/PA2G4/SDHD/EEF1E1/RPP40/MRPS2/ADSL/PSMB5/EIF3L/NDUFA11/MRPS30/NDUFB10/PS…
NIKOLSKY_BREAST_CANCER_16P13_AMPLICON	118	0.504691	1.58752	0.00200251	0.0107052	0.00686513	6324	tags=36%, list=15%, signal=30%	METRN/RPS2/ELOB/HAGHL/GNPTG/STUB1/MCRIP2/HAGH/CIAO3/NDUFB10/TSR3/RPUSD1/ZNF598/PGAP6/MSRB1/RHBDF1/MRPS34/ANTKMT/FAHD1/NUBP2/FAM234A/SLC9A3R2/CCDC78/CAPN15/RAB26/LMF1/MPG/MRPL28/TBL3/PIGQ/CLCN7/NPRL3/POLR3K/TRAF7/KCTD5/ZNF205/C16orf91/GFER/PRSS22/FLYWCH2/NHLRC4/TSC2
RIGGINS_TAMOXIFEN_RESISTANCE_DN	221	-0.403518	-1.42889	0.00201378	0.0107487	0.00689302	3770	tags=32%, list=9%, signal=29%	SCN1A/GTF2I/ADAM9/SYT1/IL6ST/ZNF148/WAC/SP3/STC2/IFIT5/SOX9/MUC1/FRYL/UBA6/PHTF2/APBB2/HMGCS1/ATXN1/CTSO/NFYB/NUDT4/RAPGEF2/CTNND2/NAB1/STC1/IFIH1/EIF2AK2/RBMS1/LGALS3BP/THAP9-AS1/BTBD3/ENC1/TBC1D9/CRYBG1/DDX60/UBXN4/ZNF217/ALB/SHTN1/DSG2/CNR1/CREBZF/MYOF/PTPN12/IFITM2/TESMIN/SLC5A3/CLK1/IFITM3/PLEKHA5/LAPTM4B/COL3A1/AOPEP/ANXA3/TMEM123/SEMA3C/CLGN/CEBPD/PDE10A/NMI/CD47/ZFP36L1/CDH3/NT5DC2/GJA1/D…
SHETH_LIVER_CANCER_VS_TXNIP_LOSS_PAM3	70	-0.532794	-1.60285	0.00201524	0.0107487	0.00689302	4899	tags=46%, list=11%, signal=41%	TNFRSF12A/NUCB2/TMEM71/MEP1B/PLEK2/LTB/SPRED1/TFF3/NID1/ITIH5/B4GALT6/CXADR/ROBO1/FABP5/ITGA6/PSRC1/MAFF/COL1A1/CCNB1/DAB1/TPM1/MYEF2/CDH1/MCM6/MYCN/MKI67/SPARC/PROM1/PHGDH/UBE2C/SCD/GPC3
MAHAJAN_RESPONSE_TO_IL1A_UP	77	-0.531691	-1.63292	0.00201893	0.0107561	0.00689779	6144	tags=42%, list=14%, signal=36%	CXCL5/PDGFRA/SPTBN1/MAP2/LRMP/RAB11B/FLT1/MYB/LTC4S/RB1/RIPK1/NFRKB/IL6ST/ITGA1/IL1B/SLC16A1/CCL20/MYC/MAFK/IL6/ISG20/PTP4A3/EFS/PCP4/EDN1/COL7A1/HBEGF/SERPINB2/AR/CXCL3/CXCL2/KDR/PTPRZ1
GROSS_HYPOXIA_VIA_ELK3_DN	154	-0.432783	-1.46607	0.00203374	0.0108227	0.0069405	4786	tags=33%, list=11%, signal=30%	PFKFB3/IL13RA1/NOCT/CCL2/TRAF6/MYH9/TCIM/FGD6/SCAF11/USP47/TGIF1/TIAM2/MYC/PLK2/ATXN2L/PTGS2/HILPDA/ACSL4/TNC/ZBTB20/IL6/PPP1R15A/SKIL/PDLIM4/AFF1/ITGA6/SPRY2/GBE1/SAT1/ENO1/VANGL2/DZIP3/EDN1/TRPS1/EGR1/HBEGF/VEGFA/CXCL6/VWA1/SLC2A1/PRDM2/NFKBIA/RAD54B/JMJD1C/TSHZ1/GJA1/ERO1A/CXCL3/NDRG1/CXCL2/TM4SF1
KATSANOU_ELAVL1_TARGETS_DN	136	-0.451264	-1.4978	0.0020388	0.0108373	0.00694986	3626	tags=32%, list=8%, signal=29%	NPNT/VWA5A/PITX1/AVPR1A/TEP1/FOXF2/TFAP4/TGFBR3/INHBB/GRB14/ANK3/CDCA7L/OSMR/PDE8A/MGLL/ADGRG2/FLT4/PLXNC1/FBN2/FANCA/LAYN/DUSP10/PKDCC/ANGPTL2/FUS/DEPDC1/COCH/TROAP/SERPINB2/CXCL6/MNS1/MYBL2/INCENP/TCF19/FMNL2/TIMELESS/SLCO2A1/CDH3/TIAM1/UBE2C/TMEM45A/ETS2/KIF18B
RODWELL_AGING_KIDNEY_NO_BLOOD_UP	223	-0.405718	-1.43686	0.00205174	0.0108938	0.00698605	4337	tags=35%, list=10%, signal=31%	VEGFC/SCN5A/PAPPA2/PCDHA9/RHEX/MYRF/TAGLN/MCAM/PRICKLE1/TNFRSF11B/SERPING1/ITGA1/MSR1/RGS1/FBN1/RBMS3/CKAP4/SOAT1/PLK2/NUAK1/COL27A1/NR2F1/ABI3BP/TRIL/PDIA4/PDGFC/PXDN/TNC/CLDN1/COL5A1/CTTNBP2NL/OSMR/MGLL/LOXL1/VASH2/ABCC3/COL1A2/CTHRC1/HOMER3/VTCN1/COL1A1/DKK3/MMP11/FEZ2/TPBG/COL14A1/CAVIN1/PGM2L1/TPM1/MYOF/ATL3/GPX8/RBP1/CXCL6/DRAM1/INHBA/C1R/MOXD1/ANXA2/NFIX/NFKBIZ/PKIB/PAM/COL3A1/RAD54L/SPTLC…
JAATINEN_HEMATOPOIETIC_STEM_CELL_DN	225	0.425859	1.43451	0.00206744	0.0109647	0.00703153	4670	tags=21%, list=11%, signal=19%	RGCC/QPCT/IFI30/CTSH/TRABD2A/CITED2/TGFBI/PSAP/CYP1B1/LTF/SULF2/MEGF9/F5/BPGM/PRKCA/KLF2/LY9/CCR1/MARCHF2/ITGB2/CXCL16/BLVRB/TUBB2A/RASGRF2/S100A9/CTSE/NPL/DENND2D/IGF2R/LEF1/CYSTM1/CSTA/CTTN/LDLRAP1/LYZ/DOCK9/GABARAPL1/STX11/ANKRD9/ITGB2-AS1/CCR7/STK17A/F13A1/FBLN7/SLC25A37/KLRF1/ZER1/STAG3
PID_BETA_CATENIN_NUC_PATHWAY	74	-0.533376	-1.62654	0.00207475	0.010991	0.0070484	4105	tags=43%, list=9%, signal=39%	DKK1/YWHAH/NCOA2/TBL1X/KCNIP4/BCL9/PITX2/HDAC2/MYC/DVL3/YWHAZ/SALL4/TRRAP/TLE1/MED12/SFN/TLE5/APC/EP300/XPO1/TCF4/MMP2/MDFIC/CDH1/INCENP/AR/CDKN2A/TLE2/TLE4/CXCL8/TCF7L1/VCAN
REACTOME_MITOTIC_TELOPHASE_CYTOKINESIS	13	-0.820088	-1.77055	0.00210198	0.0111227	0.00713285	4581	tags=92%, list=11%, signal=83%	KIF23/MAU2/SMC1A/STAG2/NIPBL/WAPL/SMC3/RAD21/PLK1/STAG1/PDS5B/KIF20A
WHITESIDE_CISPLATIN_RESISTANCE_DN	13	0.817665	1.74234	0.00210555	0.011129	0.00713689	2190	tags=62%, list=5%, signal=58%	RPS5/RPL13A/RPS16/SOD1/RPS9/IFI6/RPS21/TRIM22
WANG_LMO4_TARGETS_UP	355	-0.363108	-1.34752	0.00212829	0.0112289	0.00720097	4923	tags=34%, list=11%, signal=31%	EPM2AIP1/FOXP1/DELE1/CDC42SE1/CROCCP2/BCL7C/H3-3A/TLK1/HSP90B1/ZMIZ1/FIGN/RIN2/BCL11B/ACTG1/HNRNPA1/TFF3/NR2C2/RBMXL1/SCAI/PRKCSH/NET1/PAQR8/SLC2A4RG/LINC00865/KBTBD4/OGG1/LLGL1/SYPL1/IGFBP2/INO80D/AGR2/HELLS/BTBD2/NPIPA1/NUDT21/CNOT2/SOAT1/ATF5/PTPRG-AS1/GPR158/CFLAR/DMTF1/SGK3/RAD51D/PGRMC1/TUG1/SMIM30/MTMR12/SOWAHC/ENAH/RMI2/NFIA/ETV6/FUBP1/CDC23/SRRT/ITPRIPL2/ZFP36L2/CMAHP/MAP3K3/SERTAD4/AZI2…
BERTUCCI_MEDULLARY_VS_DUCTAL_BREAST_CANCER_DN	179	-0.419963	-1.44864	0.00212925	0.0112289	0.00720097	4074	tags=33%, list=9%, signal=30%	NORAD/MYH9/KANK2/PARVA/PDE5A/TGFB1I1/ACVR1/PTPN21/C20orf194/CCDC15/TAGLN/GTF2I/PRICKLE1/ZNF426/MDFI/PTPN14/KIDINS220/CNPY4/AGPAT2/PPP1R1B/RGS5/PDGFD/EXTL2/DAAM1/RGS4/SPRED2/MXRA7/LSP1P4/CTNND2/MYH10/CEP41/SMTN/FERMT2/CAVIN1/KATNAL1/SLX4IP/ENPP1/CACHD1/EFR3B/MTSS1/ATL1/SH3PXD2A/PCDH18/ACSL3/TTC28/AOPEP/CAPN5/MAPK7/EPHA3/FKBP9/FLNA/CAV1/NPR3/GUCY1A2/OBSL1/CADM1/FLNC/FSTL1/PTPRZ1
REACTOME_PROTEIN_PROTEIN_INTERACTIONS_AT_SYNAPSES	87	-0.517961	-1.62336	0.00215471	0.0113504	0.00727891	5252	tags=32%, list=12%, signal=28%	PPFIA3/SLITRK3/LRRTM1/LRRTM4/PTPRS/IL1RAPL2/SYT1/NLGN3/HOMER2/GRIN2D/DLGAP4/SYT2/HOMER3/STX1A/FLOT2/PPFIBP2/SLITRK5/PTPRF/PTPRD/SLITRK6/LIN7A/PPFIBP1/NRXN3/NLGN2/NLGN1/PPFIA4/IL1RAP/EPB41L2
PID_AP1_PATHWAY	70	-0.530855	-1.59701	0.00215885	0.0113594	0.00728469	5393	tags=34%, list=12%, signal=30%	TCF7L2/ETS1/FOSB/CCL2/MYB/JUND/MYC/DMTF1/SP1/IL6/COL1A2/CREB1/HLA-A/EP300/CBFB/ELF1/EDN1/EGR1/PTEN/CDKN2A/ATF2/CDK1/CXCL8/GJA1
REACTOME_RNA_POLYMERASE_I_TRANSCRIPTION	108	0.5166	1.59669	0.00218054	0.0114607	0.00734963	5131	tags=33%, list=12%, signal=29%	H2AC6/H2BC21/H2BC12/H2AJ/POLR2F/H2BC4/POLR2E/KAT2A/POLR2L/H2BC5/MAPK3/POLR1D/H4C8/POLR1C/H2BC8/CCNH/H3C10/H4-16/H2AC19/POLR2K/H4C15/CD3EAP/GTF2H1/H4C5/H2BC15/CDK7/H2AC18/CHD4/H3C14/H3C1/H2AC8/ERCC2/POLR1E/TAF1D/H2BC7/POLR1B
TONKS_TARGETS_OF_RUNX1_RUNX1T1_FUSION_HSC_UP	182	-0.41642	-1.43805	0.00218752	0.0114845	0.00736489	4580	tags=32%, list=11%, signal=29%	PNRC1/PRSS23/ERG/KLHL24/RB1/TGFB1I1/TMEM176B/P2RX4/NID1/AHR/RGS1/DNAJB5/CD226/MALL/ODF2/BAMBI/PDE4B/ANK3/HSPB1/ZBTB20/IRF7/NFKB2/SOCS2/PLCG1/GUCY1A1/CEP162/HOMER3/TOX/ENC1/FNBP1L/RBPMS/ADD3/CD200/ZNF217/AGTR1/SENP7/COCH/LPAR6/SEPTIN10/SERPINB2/WSB1/DRAM1/TRIB2/ANXA2/COL3A1/SLC2A3/PPFIBP1/ZDHHC17/TUBA1A/SPARC/SOX4/CXCL8/SMARCA1/FZD7/VCAN/TM4SF1/DDAH2/FSTL1/MFAP2
HARRIS_HYPOXIA	80	-0.512427	-1.58476	0.00221655	0.0116109	0.00744592	4760	tags=51%, list=11%, signal=46%	FLT1/CCL2/ANGPT2/TFF3/MIF/HK2/TAGLN/NFKB1/IGFBP2/XRCC5/IGF2/PTGS2/COL5A1/TGFB3/IGFBP3/PFKL/IL6/STC1/ALDOA/CA9/ENPEP/SAT1/TF/ENO1/PFKP/EDN1/PDGFB/PGK1/GAPDH/PKM/PLAUR/VEGFA/CD99/PGF/LDHA/SLC2A1/SLC2A3/CP/P4HA1/CXCL8/VIM
KYNG_DNA_DAMAGE_BY_GAMMA_RADIATION	77	-0.529491	-1.62617	0.00221536	0.0116109	0.00744592	3439	tags=30%, list=8%, signal=28%	NRP2/SP3/AVPR1A/GTF3C4/RBM6/BDH2/CRABP2/MET/CHRNA7/RNF168/PCSK5/SMAD4/HBEGF/PTGFRN/SEMA3B/ATRX/TIA1/SLCO2A1/FADS1/DSC2/SCD/FRZB/FBLN1
RUIZ_TNC_TARGETS_UP	155	-0.444483	-1.50686	0.00222922	0.0116642	0.00748011	4584	tags=41%, list=11%, signal=37%	FLRT2/PNRC1/MARCHF6/ALDH3A1/KLHL24/SLC35E2A/PDE5A/GLCE/LTA4H/IMPA2/SCG2/WDR26/CTDSP2/FOXF2/PLK2/NR2F1/BAMBI/EXTL2/PROS1/SLC2A10/ACSL4/MAN1A1/ZBTB20/BDH2/SELENOP/ROBO1/ARHGAP28/HEY1/IFIH1/BTN3A2/VGLL4/COL1A2/KRIT1/GBE1/TCF12/KDM5B/TRO/SAT1/NUMA1/PHF21A/ATP2B4/EYA1/UBXN4/CSGALNACT1/COL5A2/SLC5A3/BAZ2B/WSB1/TRIB2/MAGED4B/COL18A1/SNAP25/COL3A1/SLC2A3/ZNF532/SEMA3C/OLFML2B/BTN3A3/SOX4/IGFBP7/TNFSF10/K…
REACTOME_TELOMERE_C_STRAND_LAGGING_STRAND_SYNTHESIS	28	-0.687758	-1.77255	0.0022486	0.0117524	0.00753672	6319	tags=71%, list=15%, signal=61%	RPA2/STN1/TEN1/LIG1/WRN/PRIM2/PRIM1/FEN1/POLA2/POLD1/RFC1/CHTF18/RFC3/DNA2/RFC5/CHTF8/POLD3/POLA1/BLM/RFC4
WANG_METASTASIS_OF_BREAST_CANCER	14	-0.804146	-1.77286	0.00225858	0.0117914	0.00756172	1937	tags=57%, list=4%, signal=55%	BCL2L14/ZNF362/CEP57/ACOT11/RFX7/COL2A1/FUT3/TNFSF10
KYNG_WERNER_SYNDROM_AND_NORMAL_AGING_DN	192	0.443876	1.47051	0.00226159	0.011794	0.00756338	6330	tags=39%, list=15%, signal=33%	ARHGDIB/TXNRD1/CTDSPL/ALDH6A1/TUBA4A/TGFBR2/RPL28/DDT/GGT5/MRPL4/ATP1B3/KARS1/AAMP/MYO18A/GM2A/SLC25A16/IGFBP6/GSTM4/BDNF/CACNA1D/COG2/GRB2/GSPT1/DRAP1/CYFIP1/ATP6V0A1/COPS5/MCFD2/FAM120A/ARPC1A/PSMA5/SDC4/POLR2J/SLC35A1/IGF2R/BORCS8/CKMT1B/HCCS/GSTO1/PUDP/SFTPA2/PHKB/DAD1/DHCR24/CNN2/BECN1/UFD1/METTL1/USO1/CUL2/PPP6C/GFAP/CCL14/ST14/CCT2/DPM1/CDC123/CAPZA1/POLRMT/BABAM2/STX5/VKORC1L1/ROPN1L/COAS…
MARIADASON_RESPONSE_TO_BUTYRATE_SULINDAC_4	16	-0.772111	-1.753	0.00228194	0.0118869	0.00762293	5391	tags=75%, list=12%, signal=66%	IL23A/MYB/FAIM/TYMS/PHF10/UBTF/NUCKS1/SYK/CKAP2/FES/ZNF367/HMGB1
ZHOU_PANCREATIC_EXOCRINE_PROGENITOR	11	-0.822337	-1.69273	0.00234861	0.0122206	0.00783693	3286	tags=55%, list=8%, signal=50%	PROX1/SOX9/NR5A2/MNX1/ONECUT1/HHEX
PURBEY_TARGETS_OF_CTBP1_NOT_SATB1_DN	405	0.383575	1.3538	0.00238825	0.0124131	0.00796036	4280	tags=27%, list=10%, signal=24%	ADRA2A/ACSL5/GHITM/FDXR/VDR/HAPLN1/CTDSPL/VSTM2L/SH3BP5/MRPL41/SNX5/CD55/DSTN/TRIM55/PRDX1/PCDH20/MAGEA4/ACP5/ATP5F1B/RAB5IF/AKAP1/RPL11/MLPH/KLF2/POLR2E/VAMP2/FBXO31/MAPRE3/UBE2D4/BBC3/RASD1/PMM1/BLOC1S2/NAP1L4P1/EIF5B/KLC2/SHB/OCA2/ST13/C18orf32/ANKRD13C/TXNDC17/PIK3CD/CIB1/DZIP1/GRB2/CLIP3/MRPS16/GDE1/ABCG2/NPM3/BAK1/KPNA1/TIMM17B/IRX5/PABPC5/TACO1/PI3/RAI2/C14orf119/ARL8B/UBL5/ABCB8/LONP2/ALO…
REACTOME_GLYCOLYSIS	72	-0.529995	-1.60831	0.00239404	0.0124293	0.0079708	5399	tags=42%, list=12%, signal=37%	NUP93/PGAM2/PFKFB3/GNPDA2/POM121C/HK2/NUP85/PRKACB/NUP37/NUP160/TPI1/NUP58/PFKL/ALDOA/ENO1/PFKP/NUP54/PGM2L1/PGK1/GAPDH/NUP153/PKM/NUP62/TPR/NUP107/ALDOC/NUP210/ENO2/NDC1/PFKFB4
REACTOME_TRANSPORT_OF_MATURE_MRNAS_DERIVED_FROM_INTRONLESS_TRANSCRIPTS	43	-0.60659	-1.72076	0.00240557	0.0124668	0.00799484	7167	tags=47%, list=16%, signal=39%	NUP35/POM121/SLBP/AAAS/NUP93/POM121C/ALYREF/NUP85/NUP37/NXF1/WDR33/NUP160/NUP58/NUP54/NUP153/NUP62/TPR/NUP107/NUP210/NDC1
PID_BMP_PATHWAY	42	-0.61672	-1.73509	0.00240658	0.0124668	0.00799484	3872	tags=48%, list=9%, signal=43%	TAB2/SMURF2/CTDSP2/SMURF1/CER1/SMAD9/BAMBI/RGMA/CHRD/PPP1R15A/BMPR1A/SKI/SMAD5/SMAD4/SOSTDC1/BMPR2/RGMB/SMAD1/CTDSP1/CHRDL1
DIRMEIER_LMP1_RESPONSE_LATE_DN	31	0.682985	1.69524	0.00241316	0.0124871	0.00800785	1635	tags=39%, list=4%, signal=37%	ARHGDIB/RPS5/RPS19/PSAP/COX8A/RPLP0/ASAH1/RPL29/HPCAL1/RPS11/FAU/TAF10
KIM_GLIS2_TARGETS_UP	84	-0.51304	-1.60758	0.00242811	0.0125506	0.00804856	3693	tags=29%, list=8%, signal=26%	LILRB2/IGFBP2/NID1/IRF1/ANGPTL4/CMTM3/FBN1/S100A4/OSMR/COL1A2/COL1A1/MMP14/COL14A1/IFITM3/COL18A1/CFH/COL3A1/SPARC/CDCA3/COL4A1/EFEMP2/PDGFRL/MFAP4/MFAP2
SERVITJA_LIVER_HNF1A_TARGETS_UP	137	-0.443302	-1.47251	0.00244793	0.0126391	0.00810532	3867	tags=36%, list=9%, signal=33%	LY6K/SERPINB1/IMPA2/NPNT/TMEM98/PPARG/LPL/RRAGD/GSTM1/TMTC2/CDC20/FGF9/HMMR/ABCC3/CCNB1/ENC1/IGF2BP3/GALK1/KIF2C/MAD2L1/NEK2/MCM2/ESCO2/WEE1/ECT2/GPRC5B/GAS2L3/RACGAP1/ANXA2/STMN1/RAB27A/UCP2/KIF20A/CDCA8/CCNB2/BUB1/ANLN/TPX2/CCNA2/UBE2C/SLCO1A2/PLTP/TNFRSF19/ADAMTS5/AURKB/SCD/KIF11/CXCL2/CDKN1C
REACTOME_SIGNALING_BY_RECEPTOR_TYROSINE_KINASES	499	-0.340277	-1.29318	0.00245432	0.0126521	0.00811368	5175	tags=30%, list=12%, signal=27%	RALGDS/WWOX/MEF2A/PIK3R1/ITGA2/FGFR4/FGF20/AKT1/DUSP6/EGR3/FOSB/FLT1/SH2B2/FLRT2/PTPRS/EGR2/RANBP10/MST1R/COL9A1/VEGFC/GAB1/SPRED1/ACTG1/STAT3/HNRNPA1/FRS2/COL4A3/COL4A4/AKT3/ROCK1/ADAM10/JUND/SHC2/KIT/YAP1/TAB2/SOCS6/PTPN18/PTPRU/FLT3LG/STAM/ACTB/KIDINS220/ITCH/LAMB1/NRP2/NCF2/BCAR1/IGF2/STAM2/PAK2/LYN/PRKACB/CTNND1/SPRY1/COL27A1/CRKL/RAPGEF1/RNF41/HNRNPF/PDGFD/GABRB2/ATP6V1B1/MST1/PDGFC/POLR2A/…
BOYAULT_LIVER_CANCER_SUBCLASS_G1_UP	116	-0.465174	-1.51157	0.00245586	0.0126521	0.00811368	4718	tags=41%, list=11%, signal=37%	ZSCAN18/UBXN7/TLR5/ARHGEF3/MYRF/STT3A/HIC2/SOX13/POGZ/ZNF551/PRPF4B/ARID3A/SETDB1/ZNF165/IGF2/ZNF83/RBM8A/SOX9/CDK19/DENND2B/RO60/SMARCC1/MARCHF3/CXADR/CTNND2/SREK1IP1/KLHL23/SFI1/C2CD5/TRIOBP/KDM5B/MPZL1/AHSA2P/MMP11/RBFOX2/DHRS7/EPHB4/DNAJC9/LBR/BRD3/HNRNPA0/TPR/TIA1/NRXN3/SMARCA1/NREP/MEX3D/PDGFA
DELYS_THYROID_CANCER_DN	232	-0.405084	-1.43174	0.00246188	0.0126692	0.00812462	4080	tags=30%, list=9%, signal=27%	GNA14/TNXB/KIT/MTMR4/RYR2/ASPH/RGS17/IER2/TBC1D4/TNFRSF11B/BCL2/MDM1/PTN/SORD/FOXJ1/FXYD1/IGF2/CLCNKB/SLC38A1/LIPG/ZFPM2/PRKACB/ITIH5/TGFBR3/SFRP1/GRB14/ZNF302/TLE1/ZFP36L2/FABP5/SLC16A2/FBLN5/MT1F/MT1X/ADD3/SALL2/NUP62CL/TNFAIP8/HSPA12A/DNAJB4/HHEX/CLMN/LPAR1/ALDH7A1/EGR1/ENPP1/MYCN/SDC2/TSPOAP1/CLDN5/DIO2/MEIS2/SORBS2/CSRP2/FGFR2/PDE10A/TLE4/PROM1/EPHA3/RASSF9/FXYD6/LRP2/TNFSF10/SEMA3D/SETBP1/G…
MCCABE_BOUND_BY_HOXC6	435	-0.346816	-1.30526	0.00249118	0.0128059	0.0082123	4441	tags=24%, list=10%, signal=22%	FAM72B/SGPL1/ZNF536/PKD1/B3GALT2/CHD9/AGBL3/PLCB3/MAP3K15/ZFP82/RIMBP2/CGB7/ZFP90/TRIM39/LIG3/KBTBD4/CNTN1/SART3/GTF2H3/MAMLD1/MTF2/VWA5A/LMO3/CBFA2T2/FGL1/STON2/CLCNKB/CREB3L4/ZCCHC14/PCGF3/KLF8/C20orf96/PAK2/NCBP3/DPP10/E2F8/FBXL14/WDHD1/PTHLH/RBM12B/CHST6/CLUHP3/SMIM30/SNRNP40/CEP83/SMG1/ZNF641/CARD8/ZNF561/ARHGAP33/NFKB2/STC1/ZNF182/ASXL3/TLE5/RBAK/LPAR2/DOCK7/FER1L4/KIF12/BTBD3/TBC1D9/FCHSD2…
ACEVEDO_LIVER_CANCER_WITH_H3K27ME3_UP	275	-0.386318	-1.40327	0.00250785	0.0128775	0.0082582	4782	tags=27%, list=11%, signal=24%	GNPDA2/GPRIN3/TMEM71/GADL1/FAM189A2/SPRED1/AKT3/MTX3/WDR64/LINC02210/TMEM144/AGR2/MGA/MLLT3/SCN11A/PRIM2/GSDMC/PTPRR/IGSF1/ITIH5/DSC3/CRISP3/B3GALT5/SMAD9/PDE1A/ADGRF4/MCU/LPAR3/RTL5/MIR99AHG/FZD8/IL6/OSMR/FMN2/FZD1/CREB5/COL1A2/GUCY1A1/SLC16A9/TANC2/TOX/YTHDC1/RBPMS/NFIB/SATB1/PBX1/SDK1/C6orf141/MACROH2A2/TCF3/ZNF624/TMSB15A/OSBPL10/CSRNP3/SERPINB2/SCIN/PTEN/PAM/STEAP4/ZNF827/CTNNA3/COL3A1/PLBD1…
VILIMAS_NOTCH1_TARGETS_UP	50	-0.598049	-1.72017	0.00251345	0.0128921	0.00826757	9225	tags=50%, list=21%, signal=39%	RAG2/CCL5/DDR1/RRAS2/LAT/IL10RA/JUNB/NFATC1/TNFRSF18/CD3G/BIRC2/GATA3/BIRC3/EGR2/RAG1/CD83/TRAF1/IRF7/NFKB2/HEY1/NRARP/TOX/EGR1/NFKBIA/NOTCH3
REACTOME_NUCLEAR_IMPORT_OF_REV_PROTEIN	34	-0.634508	-1.7016	0.00253415	0.012984	0.00832653	7167	tags=50%, list=16%, signal=42%	NUP35/POM121/RCC1/AAAS/NUP93/POM121C/NUP85/NUP37/NUP160/NUP58/NUP54/NUP153/NUP62/TPR/NUP107/NUP210/NDC1
DURCHDEWALD_SKIN_CARCINOGENESIS_DN	264	-0.384359	-1.39107	0.00254157	0.0130079	0.0083418	4584	tags=32%, list=11%, signal=29%	FLRT2/PMAIP1/MYH9/OGA/KIF5B/CREBBP/RIPK1/LY6K/NET1/MED13/DCUN1D3/TBL1X/CEP350/PRPF4B/ARID3A/XDH/DDX3X/ATF7IP/CTNND1/PLK2/YWHAZ/SMURF1/MMP10/MAFK/CPNE2/HMGCS1/PTGS2/TAOK1/ENAH/HIPK3/ANK3/SMG1/RBM25/CAMSAP2/KLK12/LIN9/HMMR/TMX3/HOOK1/ITGA6/UBE2Q2/CRABP2/MET/HOMER3/DEGS2/LGALS3BP/SLC4A7/KDM5B/C16orf72/FBLIM1/ABCG1/RNF38/FCHSD2/TPD52/CCNY/TPM4/DAPK2/BLCAP/APLN/TPBG/LXN/MBOAT1/TMEM43/TPM1/ADNP/PHLDB2/…
BROWN_MYELOID_CELL_DEVELOPMENT_DN	124	0.486351	1.5366	0.002577	0.0131604	0.00843963	4711	tags=37%, list=11%, signal=33%	PAPSS2/HSPD1/C1QBP/RCL1/AHCY/MGAT5/TMEM97/NOP16/PSAT1/PC/RPL23/SOD1/BIN1/SLC7A8/OSBPL3/SLC1A5/F2R/ZFAS1/CCT6A/GTPBP4/RUVBL2/SPNS2/NARS1/NPM1/GART/BZW2/HSPH1/EIF4E/RIPOR1/WDR43/NSUN2/SLC22A3/UTP4/XPOT/SSR3/TIMM8A/ST7/NOLC1/PPAN/NT5C3B/CALR/NOP56/AASDHPPT/F2RL3/DIS3/IDE
CHARAFE_BREAST_CANCER_BASAL_VS_MESENCHYMAL_UP	124	0.485921	1.53524	0.002577	0.0131604	0.00843963	4731	tags=39%, list=11%, signal=35%	AKR1B10/APRT/PROM2/COX5B/ATP1A1/DMAC1/EPN3/TSC22D3/RHOD/SERPINA3/LCN2/SCNN1A/PRR15L/CLCA2/TSTD1/ITPA/TLCD1/LITAF/WDR61/SH3YL1/PKP3/SPINT1/LIMK2/RAB25/TMEM183A/OSER1/PPP1R14C/C1orf116/OVOL2/MPP7/MAL2/ESRP2/CKMT1B/ADGRF1/ACSL1/CDS1/S100P/MPZL3/TMEM134/BSPRY/RNF39/GSN/ST14/PRSS8/SH2D3A/GJB3/TRIM29/SPINT1-AS1
PID_EPHRINB_REV_PATHWAY	30	-0.652261	-1.71228	0.00259743	0.0132503	0.00849728	7762	tags=50%, list=18%, signal=41%	ITGA2B/YES1/EPHB1/NCK2/FGA/PTPN13/EPHB2/PIK3R1/EFNB2/LYN/MAPK8/FYN/EPHB4/SRC/TIAM1
BHAT_ESR1_TARGETS_NOT_VIA_AKT1_UP	210	0.431162	1.43629	0.00261473	0.0133105	0.0085359	3913	tags=27%, list=9%, signal=25%	GREB1/DEPTOR/OSGIN1/RCL1/ZNF703/CYP1B1/ACSS1/MYBBP1A/MFSD2A/WDR46/WWC1/SRM/MLPH/ALPL/TIPARP/NT5DC3/SCNN1A/AP1B1/P2RY2/RPP40/SCNN1B/CARD19/SHB/RPUSD1/TPD52L1/PIP4K2A/NOL6/TBKBP1/RRP12/LETM1/IFRD1/GPATCH4/TSKU/SLC22A5/MYEOV/ADCY9/FHL2/CCND1/OVOL2/TRMT61A/NEIL2/IGFBP4/AMZ1/TJP3/ZNF185/CA12/GNL2/SYBU/TMEM104/NXNL2/NOLC1/KHK/INO80B/CAMTA1/SLC29A1/ASB13/GFOD1
SAGIV_CD24_TARGETS_UP	22	-0.721435	-1.76791	0.00261492	0.0133105	0.0085359	1029	tags=59%, list=2%, signal=58%	RARRES1/PLPPR2/TFPI/MCAM/FRYL/LDB1/TRIM8/PHIP/SMC4/SFPQ/CAV1/ASPM/SLC4A4
SU_LIVER	57	0.588949	1.63735	0.00262298	0.013337	0.00855289	3806	tags=26%, list=9%, signal=24%	TAT/SLC25A20/CPS1/APOB/C4BPB/DDT/SLC25A13/GBA/CRP/APCS/FMO3/CYP1A2/SAA4/CTH/F12
LIU_TARGETS_OF_VMYB_VS_CMYB_DN	43	-0.604649	-1.71525	0.00265229	0.0134715	0.0086391	3366	tags=47%, list=8%, signal=43%	GATA3/IL23A/USP31/NPIPA1/SLC38A1/CERS6/CCL20/NRIP3/GNG2/IL6/CMAHP/ADRB2/ARHGAP24/CHSY1/CSGALNACT1/FAM107B/KLF5/COL4A2/VCAN/TM4SF1
KEGG_PRIMARY_BILE_ACID_BIOSYNTHESIS	16	0.781857	1.75928	0.00266721	0.0135326	0.00867829	5805	tags=69%, list=13%, signal=60%	ACOX2/BAAT/CYP39A1/SCP2/SLC27A5/HSD17B4/CH25H/AKR1D1/CYP27A1/CYP46A1/AKR1C4
GENTILE_UV_RESPONSE_CLUSTER_D6	34	-0.63151	-1.69356	0.0026913	0.01364	0.00874719	7177	tags=59%, list=17%, signal=49%	EPS8/IFNGR2/UGCG/PDGFRA/ZNF146/STRN3/PUM2/HMGXB4/NFYB/CHTOP/AHDC1/IGF2BP3/LPAR1/NFYA/FZD2/QKI/TRIB2/MEIS2/TLE4/ARL4C
JIANG_AGING_CEREBRAL_CORTEX_DN	49	0.61307	1.67796	0.0027163	0.0137383	0.00881025	3636	tags=39%, list=8%, signal=36%	KCNMA1/ACO2/ATP6V1E1/EEF1G/ATP1A1/NME1/APOE/CS/ATP6AP1/HSP90AB1/AP2M1/NSF/SKP1/CALM2/PFN1/RAB14/DAD1/RAB2A/DNAJB11
KEGG_NEUROTROPHIN_SIGNALING_PATHWAY	126	0.482057	1.5287	0.00271657	0.0137383	0.00881025	5455	tags=36%, list=13%, signal=31%	ARHGDIB/RAP1A/NFKBIB/BAX/PRKCD/CAMK2G/CALM1/YWHAB/PDPK1/MAPK3/MAPK11/MAPK12/MAP2K2/ARHGDIA/SORT1/BDNF/PIK3CD/PIK3R3/GRB2/CALM2/IRAK3/RPS6KA5/MAP3K1/IRS4/MAPK13/IRS2/IRAK2/IRAK1/HRAS/YWHAG/CALML6/CSK/MAGED1/MAPK9/MAPK1/RPS6KA1/CRK/RPS6KA2/BAD/NTF3/SHC1/RPS6KA3/RHOA/AKT2/NFKBIE
REACTOME_SIGNALING_BY_NUCLEAR_RECEPTORS	293	0.405667	1.39656	0.00272344	0.0137468	0.00881566	5505	tags=29%, list=13%, signal=26%	PDK4/GREB1/GNAI1/H2AC6/PRKCZ/H2BC21/H2BC12/ALDH1A3/APOD/GPAM/CPT1A/PDHX/H2AJ/POLR2F/CALM1/FKBP5/H2BC4/TGFA/APOE/POLR2E/PDPK1/POLR2L/H2BC5/AKR1C3/UGT1A3/MAPK3/DLD/H4C8/HSP90AB1/H2BC8/PDHA1/ALDH1A1/RARG/H3C10/PDHB/H4-16/PPID/GTF2A2/PIK3R3/H2AC19/ANGPTL3/PDK2/FASN/POLR2K/SRF/H4C15/CCND1/POLR2I/POLR2J/DHRS4/EGF/ADH1C/EBAG9/ELK1/H4C5/HRAS/HSP90AA1/H2BC15/AREG/GNG10/H2AC18/MAPK1/NR1H3/RDH10/H3C14/MMP7/…
RUTELLA_RESPONSE_TO_HGF_DN	233	-0.4	-1.41301	0.00272411	0.0137468	0.00881566	5834	tags=39%, list=13%, signal=34%	AMY1A/TMX4/NME3/PLCL2/NFATC2IP/ADAM8/CFD/ARGLU1/TCF7L2/GALC/CELF2/LRMP/CYTH1/ZHX2/DUSP6/CRIP1/METTL9/IL13RA1/RUNX3/MYD88/TNK2/HNRNPA1/FKBP1B/MAN2A2/HLA-E/CD83/NET1/LTA4H/LILRB2/IMPA2/CIRBP/SCN11A/NR4A2/RNASET2/HOMER2/RO60/SETD1B/RSAD2/CEP83/LPP/SMARCC1/FYN/ST6GAL1/ZDHHC18/STK17B/NKTR/EIF2AK2/TRAF5/MAP3K14/MAP3K6/PTP4A3/FCHSD2/PLIN2/RNF138/PDIA5/PELI1/ARHGEF40/RERE/CASP1/TREM1/CCNL1/MYO15B/EGR1/IF…
REACTOME_RHO_GTPASE_CYCLE	139	-0.448534	-1.49563	0.0027295	0.0137592	0.00882361	6231	tags=45%, list=14%, signal=39%	ARHGAP4/NGEF/ARHGEF37/ITSN1/ARHGAP9/ARHGEF17/FGD4/ARHGEF11/ARHGAP10/RHOV/ARHGEF35/TRIO/STARD13/ARHGEF19/OPHN1/ARHGAP18/ARHGAP5/ARHGEF5/ARHGAP22/FAM13B/ARHGEF3/ARHGAP11B/NET1/ARHGAP27/ARHGAP32/TIAM2/OCRL/DEPDC7/SRGAP1/ARHGEF10/ARHGAP17/ABR/SOS2/ARHGAP33/ARHGAP28/SRGAP2/RHOBTB1/ARHGEF2/SOS1/MCF2L/FGD1/ARHGEF40/ARHGEF39/ARHGAP24/ARHGAP11B/ARHGEF38/ARHGAP19/ARHGEF18/ARHGAP23/MYO9A/PLEKHG2/ECT2/OBSCN/…
CERVERA_SDHB_TARGETS_1_UP	120	-0.470007	-1.53479	0.00273967	0.0137899	0.00884332	3308	tags=34%, list=8%, signal=32%	LONRF2/FAM81B/LOXL2/KRT17/C2CD4A/SH3BGRL/ITIH5/SLCO5A1/PTHLH/CER1/LYPD1/ST6GALNAC2/SOCS2/COL1A1/TANC2/PCSK5/EDN1/ASCL1/PGM2L1/REEP1/ARHGAP23/PCDH9/TNNI2/LAMC2/SPOCK3/MYOF/GPX8/INHBA/CACNB3/FAM149A/PLBD1/TUBA1A/RIMKLA/SCD5/WLS/OLFML2A/TNFRSF19/SUSD4/FSTL1/MFAP4/NEURL1B
SANSOM_WNT_PATHWAY_REQUIRE_MYC	61	-0.554746	-1.64341	0.00274149	0.0137899	0.00884332	4467	tags=41%, list=10%, signal=37%	TNFRSF12A/GEMIN2/ROCK1/IGFBP2/ACTL6A/SOX9/MYC/DVL3/PTGS2/CCNE2/SIM2/PARP1/MMP14/EDN1/LDB1/FZD6/CCN4/FOXA1/SMC4/SEMA3C/SOX4/TIAM1/FZD7/TNFRSF19/FRZB
HOLLERN_SOLID_NODULAR_BREAST_TUMOR_DN	30	-0.650252	-1.707	0.00275605	0.013838	0.00887417	5484	tags=53%, list=13%, signal=47%	RYR1/HAS2/PTPRS/P4HA2/PANX1/NID1/RBMS3/VASH2/GLI3/IFITM1/PDPN/COL2A1/TPST1/RALGPS2/SPARC/GJA1
LI_WILMS_TUMOR_VS_FETAL_KIDNEY_2_UP	28	-0.679714	-1.75182	0.00275697	0.013838	0.00887417	3289	tags=54%, list=8%, signal=50%	HEXB/BUB3/HOXD9/IGF2/H2AZ1/SET/SLC43A3/CRABP2/ENC1/EZH2/STMN1/MYCN/BIRC5/NSD2/VCAN
REACTOME_INTERCONVERSION_OF_NUCLEOTIDE_DI_AND_TRIPHOSPHATES	29	0.689555	1.7071	0.00276474	0.0138622	0.00888968	4183	tags=48%, list=10%, signal=44%	RRM2B/GLRX/TXNRD1/AK1/GSR/NME1/NME2/GUK1/TXN/CTPS1/AK2/CMPK1/DCTD/AK6
WIEDERSCHAIN_TARGETS_OF_BMI1_AND_PCGF2	55	-0.566168	-1.65555	0.0028197	0.0141226	0.00905669	3859	tags=40%, list=9%, signal=36%	NET1/SDC3/P4HA2/PTHLH/BCL7A/CRISPLD2/CLDN1/COL5A1/ITGB8/LFNG/DNMT3B/EDN1/NAV1/TPM1/MYOF/PLAUR/INHBA/ITGA4/NAV2/AXL/BMP5/CAV1
BIOCARTA_NDKDYNAMIN_PATHWAY	17	0.783939	1.7897	0.00286063	0.0142982	0.00916926	3132	tags=53%, list=7%, signal=49%	AP2A1/CALM1/NME1/NME2/AP2M1/SYNJ2/CALM2/EPN1/SYNJ1
ZHOU_INFLAMMATORY_RESPONSE_FIMA_DN	273	-0.387258	-1.40155	0.00286085	0.0142982	0.00916926	4486	tags=27%, list=10%, signal=24%	C2orf74/GEMIN2/RIN2/ARHGEF3/CD300LB/KCNE3/CHD9/PDE5A/AJUBA/PRICKLE1/SCN8A/IFFO1/DTWD1/YPEL4/MTF2/FPGT/ZNF165/BOLA1/TTC30B/RAB11FIP4/ZBTB14/ZBED5/PRIMPOL/INHBB/ANKMY2/POLM/SGSM2/NUDT12/VASH2/TMEM107/KLHL23/VGLL4/ZNF362/ZNF718/MYH10/OSGEPL1/SPRY2/LBHD1/AURKA/ARHGEF40/SLF2/AP4B1/MCTP2/TRPM3/ASCL1/CNKSR2/HHEX/REEP1/GPR180/TNNI2/SLC27A6/ZMYM3/LPAR6/ZNF785/KREMEN1/NINL/PIMREG/MRTFB/RHOBTB2/MIS18BP1/FAM…
GRAHAM_CML_DIVIDING_VS_NORMAL_QUIESCENT_DN	92	-0.485682	-1.53205	0.00289288	0.0144428	0.00926201	5722	tags=41%, list=13%, signal=36%	SPTBN1/ADAM8/TFPI/TCF7L2/MYO5C/PTPRC/BIRC3/DUSP6/ERG/TGFB1I1/HLX/MLLT3/IL1B/C3orf14/ADGRG6/ANXA5/CTSO/GUCY1A1/RBPMS/TCF4/CD200/TSPAN6/TPBG/PCDH9/CXCL6/INHBA/DMD/PPFIBP1/BCL11A/CXCL1/CXCL8/CXCL13/SVIL/CXCL3/TNFSF10/MPZL2/CXCL2/TM4SF1
BEIER_GLIOMA_STEM_CELL_UP	40	-0.613073	-1.71379	0.00291192	0.0145224	0.00931307	4656	tags=50%, list=11%, signal=45%	MYO5C/LINC00997/CPXM1/SOCS6/SERPING1/EPHA4/CHRNA1/NRIP3/TLE1/NT5C3A/NRARP/SIX1/ABCA1/RTTN/SALL3/C18orf54/PROM1/AKAP7/FGFR3/OBSL1
ALFANO_MYC_TARGETS	238	0.421128	1.42511	0.00291768	0.0145357	0.00932156	5040	tags=37%, list=12%, signal=33%	GLDC/TACC2/GAS6/SMPD1/TUFM/EEF1A1/IMPDH1/DESI1/TRAP1/RAP1GAP/RSL1D1/SYNGR2/MVP/EBNA1BP2/AKAP1/TOMM40/SNU13/TTLL12/DDX21/KARS1/FARSA/GPD1L/RER1/PPIF/QDPR/CD59/DDB2/MAP1B/RASSF4/RRP12/AATF/FAM216A/PYGB/PSMG1/PES1/PCCA/HMGB3/RND2/PON1/IMP4/GNPDA1/ID3/SLC20A1/EIF2B1/EHD1/CELSR3/SLC39A6/ACTR1A/TIMP2/PAICS/SDC4/HS3ST1/MYCBP/VCP/TGFB2/CDC42EP3/STOM/ACKR3/CLCN2/MYL12A/WBP1L/SURF2/PEX5/PDCD11/PTPRN2/SDC1/…
WANG_SMARCE1_TARGETS_DN	381	0.378486	1.32739	0.00292812	0.0145721	0.00934496	5069	tags=34%, list=12%, signal=30%	CSAG3/TACC2/HIGD1A/GDF15/TRABD2A/LYPLA1/IDH3A/GRPEL1/CITED2/SLC39A8/NT5E/C1QBP/COX5A/CYP1B1/FH/PLCB4/NOP16/ZNHIT1/SDHB/STEAP3/MRS2/LAP3/SRM/HSPA4L/GASK1B/NOC2L/PDCD2/HSPA9/ATAD3A/MX2/CD9/HSPA4/PPIF/TSTD1/NDUFV2/QDPR/TPD52L1/PDHA1/PRDX3/BDNF/DNAJC15/AKR1B1/ATP5ME/TMEM14B/CACYBP/FAM216A/GTF2A2/NDUFAB1/DRAP1/EHD4/PDF/KYNU/PRDX2/TXNL4A/TBRG4/C11orf24/GLRX3/OGFRL1/SUCLA2/COX7B/CD70/IL13RA2/PDCD5/HSPH1…
KEGG_PYRIMIDINE_METABOLISM	98	0.504781	1.5437	0.00294745	0.0146528	0.00939666	6278	tags=41%, list=14%, signal=36%	RRM2B/TXNRD1/CDA/NT5E/POLR2F/TXNRD2/NME1/NME2/POLR3H/POLR2E/AK3/POLR2L/ITPA/POLR1D/ENTPD6/POLR1C/POLD4/PNPT1/POLR2K/POLD2/POLR2I/POLR2J/NME6/CTPS1/CMPK1/DCTD/POLE4/POLR3K/POLR2G/NT5C1A/POLR1E/POLR2J3/POLR1B/UPP1/POLR3D/POLR3B/POLR2D/POLR1A/POLR3A/POLR2H/UPP2
YAGI_AML_WITH_T_8_21_TRANSLOCATION	364	-0.356678	-1.32698	0.00295461	0.0146728	0.00940952	5610	tags=32%, list=13%, signal=28%	TFPI/CFD/ZNF274/MEIS1/SWAP70/LGALS1/CXCR5/LIMS1/ARID5B/PIK3R1/PTGDS/BTN2A1/APP/MPPE1/SOCS5/GNAS/PNRC1/POU2F2/MARCHF6/CYP2A13/GPM6B/ITGB4/ESPL1/MYRF/KIT/AGXT/ZNF91/ZNF273/JAK3/SLC9A3R1/NFKB1/ZC3H13/NFRKB/TGIF1/AGPAT2/ERF/SORD/UGP2/TMF1/CD226/SAP30/KDM3B/CERS6/LY75/S100A4/TFAP4/ENOSF1/SMARCD1/CLSTN1/DARS1/ZSCAN12/MTMR9/LYPD1/SMG1/ETV6/PXDN/ELF4/ATXN1/ABR/MAN1A1/TGOLN2/GLO1/CAV2/REL/MED12/SFN/ROBO1/…
REACTOME_TRANSCRIPTIONAL_REGULATION_OF_PLURIPOTENT_STEM_CELLS	29	-0.661232	-1.71954	0.00299398	0.0148525	0.00952478	4895	tags=45%, list=11%, signal=40%	FOXP1/STAT3/DKK1/SALL4/NR5A1/PBX1/GATA6/HHEX/SMAD4/HIF3A/FGF2/POU5F1/SOX2
RAY_TUMORIGENESIS_BY_ERBB2_CDC25A_UP	195	-0.409246	-1.4279	0.00299756	0.0148546	0.00952609	4673	tags=30%, list=11%, signal=27%	TRPV4/ANGPT2/OR2J3/FAM162A/RCOR1/DNASE2/ACVR1/EFHC1/HELLS/CREB3L4/RRAGD/ICA1L/PRIM1/ITIH5/WDR66/HNRNPA2B1/NFIA/ELF4/TRIM45/OSBPL1A/TNFSF13/CREB5/ST6GALNAC2/MCM7/BRCA2/CHD3/JPT2/TANC2/SRSF4/PKDCC/CD200/MED23/DTL/ARHGAP19/DMTN/GMNN/SHCBP1/ABCA2/ECT2/KREMEN1/RBP1/CIP2A/NID2/CENPK/ATP11B/SLC15A1/KIF22/KIF20A/CENPA/C18orf54/CKS1B/MKI67/CCNB2/DLGAP5/SLIT2/PLAGL2/SEMA3D/SCD
EPPERT_HSC_R	123	-0.45096	-1.48528	0.00303007	0.0149998	0.00961921	5722	tags=43%, list=13%, signal=38%	SPTBN1/TMEM200A/FAM106A/TFPI/MEIS1/TCEAL9/ITSN2/CD109/MYO5C/EIF5/DUSP6/ERG/DDX5/RNF125/BEX1/MLLT3/KDM2A/ZNF165/MAFK/ADGRG6/KAT6A/RIMKLB/RLIM/LPP/ANK3/COL5A1/EPC1/C2orf69/ELK3/TMEM107/SOCS2/GUCY1A1/INSIG1/TCF12/DAPK1/RBPMS/FRMD4B/ASXL1/RBM7/CRIM1/KSR1/KMT2A/DACH1/PNISR/DRAM1/PAM/CFH/PDE10A/FAM169A/PROM1/BCL11A/NPR3/SMARCA1
CHIARADONNA_NEOPLASTIC_TRANSFORMATION_CDC25_DN	150	0.468637	1.51938	0.00305826	0.0151047	0.00968646	4113	tags=36%, list=9%, signal=33%	PAPSS2/IFI30/TNS2/LYPLA1/ALDH2/TALDO1/ATP6V0B/C16orf89/MAP1LC3B/EBF3/ACOT7/ASAH1/CYB5R1/PNKD/KLF2/AVPI1/PHLDA3/ANXA4/GIPC1/CD9/GUK1/CD151/CARD19/SLC1A5/PLEKHA7/GAMT/BAIAP2/POLD4/PNPLA2/TEAD4/TM2D2/TRAK1/DAP/FHL2/NEDD9/ABCC1/DGCR6L/VAMP5/PLAC8/MGST3/ABHD8/RNF13/IGFBP4/VPS26C/S100A13/RETREG1/SNAPC2/SLC35E4/C9orf16/ANXA11/SLC29A1/ACYP2/NAA38/CES2
HUANG_DASATINIB_RESISTANCE_UP	80	-0.507391	-1.56918	0.00306093	0.0151047	0.00968646	4074	tags=44%, list=9%, signal=40%	PARVA/LIMA1/DPYD/MAP7D1/LYN/ZNF559/DENND2B/DCBLD2/PDGFC/SH3KBP1/LARP6/COL5A1/EGFR/CAV2/OSMR/ELK3/BTN3A2/EPHA2/MET/PPP1R18/EXT1/LAYN/CCDC50/DUSP10/CAVIN1/MAML2/PGM1/NDC80/PCDH7/BTN3A3/CAV1/UBE2E3/KCTD12/FSTL1/ANXA1
PID_AVB3_INTEGRIN_PATHWAY	74	-0.525926	-1.60382	0.003058	0.0151047	0.00968646	4366	tags=43%, list=10%, signal=39%	COL13A1/ITGAV/ADGRA2/IRS1/PIK3R1/AKT1/COL9A1/COL4A3/COL4A4/ROCK1/BCAR1/ILK/COL5A1/COL4A6/COL1A2/CBL/COL1A1/COL14A1/COL7A1/FGF2/COL5A2/VEGFA/SRC/COL16A1/PXN/COL3A1/COL2A1/COL11A1/COL12A1/COL4A1/KDR/COL9A2
REACTOME_RNA_POLYMERASE_II_TRANSCRIBES_SNRNA_GENES	77	0.539001	1.59383	0.00313263	0.0154422	0.00990292	6149	tags=47%, list=14%, signal=40%	POLR2F/POLR2E/POLR2L/SSU72/SNAPC1/SUPT4H1/GTF2A2/TAF9/POLR2K/GTF2E2/POLR2I/POLR2J/NABP2/SNAPC5/SNAPC2/CDK7/CCNK/ELL3/RPRD1A/TAF13/SUPT5H/INTS12/GTF2F2/NCBP1/INTS5/ZC3H8/POLR2G/INTS9/ELL/NABP1/GTF2B/SNAPC3/GTF2F1/POLR2D/TAF11/POLR2H
REACTOME_NUCLEAR_ENVELOPE_NE_REASSEMBLY	76	-0.511434	-1.56765	0.00314354	0.0154797	0.00992695	3669	tags=33%, list=8%, signal=30%	UBE2I/NUP85/CHMP4C/NUP37/TUBB2B/LEMD3/TUBA1C/NUP160/VRK1/NUP58/VRK2/TUBB1/CCNB1/NUP54/ANKLE2/LBR/NUP62/NUP107/TUBA1A/CCNB2/CDK1/LMNB1/TUBA1B/TMPO/NDC1
REACTOME_MOLECULES_ASSOCIATED_WITH_ELASTIC_FIBRES	38	-0.634841	-1.76056	0.00315974	0.0155432	0.00996766	2215	tags=32%, list=5%, signal=30%	FBN1/TGFB3/EMILIN2/FBLN5/ITGB8/FBN2/LTBP4/FBN3/EFEMP2/FBLN1/MFAP4/MFAP2
POMEROY_MEDULLOBLASTOMA_PROGNOSIS_DN	44	0.62956	1.67929	0.00319848	0.0157172	0.0100793	3018	tags=48%, list=7%, signal=44%	RPS19/TKT/ATIC/RPSA/RPL7A/RPS18/TRAP1/RPS10/COX8A/RPL27A/RPL11/RPS14/RPL29/LDHB/RPS8/RPL10A/RPS25/BYSL/IARS1/ERP29/RPL35A
REACTOME_SIGNALING_BY_TGF_BETA_FAMILY_MEMBERS	101	-0.47671	-1.53553	0.00323475	0.0158788	0.0101829	3910	tags=38%, list=9%, signal=34%	MTMR4/TRIM33/TGIF1/SMURF2/MYC/SMURF1/CER1/SMAD9/SP1/BAMBI/INHBB/ACVR1C/PPP1CB/PPP1R15A/CCNT2/BMPR1A/UBE2D1/SKIL/PARP1/TGIF2/CBL/SKI/UBC/NCOR2/XPO1/WWTR1/SMAD5/ARHGEF18/ACVR2B/SMAD4/RBL1/INHBA/BMPR2/GREM2/TGFBR1/SMAD1/CHRDL1/FSTL1
STEGER_ADIPOGENESIS_DN	25	-0.692747	-1.76032	0.00325645	0.0159685	0.0102405	1266	tags=40%, list=3%, signal=39%	CMTM3/MMP2/OSR1/RBP1/RNASE4/PDPN/CCN4/OLFML3/LOX/FSTL1
PID_HES_HEY_PATHWAY	47	-0.594946	-1.70275	0.00327156	0.0160259	0.0102772	6849	tags=57%, list=16%, signal=48%	NCOR1/GATA1/CD4/RCAN1/RBBP8/E2F1/ARNT/MYB/STAT3/CREBBP/KDM1A/RB1/TLE1/HEY1/SPEN/PARP1/NEUROG3/EP300/NCOR2/GATA6/ASCL1/TCF3/MAML1/MAML2/AR/HES6/KDR
KEGG_PURINE_METABOLISM	159	0.444955	1.44723	0.00332056	0.0162489	0.0104202	6149	tags=38%, list=14%, signal=32%	RRM2B/PAPSS2/APRT/ATIC/AK1/NT5E/IMPDH1/IMPDH2/POLR2F/NME1/NME2/POLR3H/POLR2E/POLR2L/GUK1/ITPA/POLR1D/ADSL/ENTPD6/POLR1C/NPR1/GMPR2/POLD4/ADK/GART/PNPT1/GMPR/POLR2K/ADCY9/PAICS/POLD2/ADSS2/POLR2I/POLR2J/NME6/ADCY4/PDE4A/NUDT9/AK2/NUDT5/ADA/PRPS1/POLE4/POLR3K/GUCY2D/POLR2G/NT5C1A/POLR1E/POLR2J3/POLR1B/POLR3D/POLR3B/GUCY2C/POLR2D/PDE6H/ADCY7/POLR1A/DGUOK/POLR3A/POLR2H
RICKMAN_HEAD_AND_NECK_CANCER_A	101	-0.475801	-1.5326	0.00332652	0.016261	0.010428	4767	tags=39%, list=11%, signal=34%	SHISA2/MYB/SVIP/EDAR/TCIM/DAPL1/SELE/CLDN10/TNFRSF11B/BCL2/SYNPO2/ODAM/CENPV/GPR158/SFRP1/ZNF483/ARNT2/VASH2/MAP7D2/ZNF704/AFAP1-AS1/CD200/PCDHB2/IL17RD/AS3MT/TMSB15A/SOSTDC1/MOXD1/CRACD/MYCN/DMD/FRAS1/PABPC4L/ZNF711/CLDN3/PTX3/TSPYL5/FRZB/COL9A2
BOYLAN_MULTIPLE_MYELOMA_C_CLUSTER_UP	36	-0.626821	-1.70842	0.00334162	0.0163178	0.0104645	4341	tags=56%, list=10%, signal=50%	RBM14-RBM4/MLLT1/RAG1/TYMS/GABPB1/SLC43A3/NRARP/CAD/APC/HNRNPD/KRAS/SSX2IP/UHRF1/FOXP4/NFYA/TIFA/GAS2L3/MARCKSL1/FOXM1/SKP2
INAMURA_LUNG_CANCER_SCC_UP	13	-0.808982	-1.74657	0.00335921	0.0163866	0.0105086	3713	tags=62%, list=9%, signal=56%	OSGEP/DSC3/SFN/NECTIN1/CDCA5/SLC2A1/TPX2/TOP2A
KEGG_HISTIDINE_METABOLISM	29	0.684489	1.69456	0.00337265	0.0164351	0.0105397	5109	tags=48%, list=12%, signal=43%	MAOA/HAL/ALDH2/ALDH1A3/ALDH1B1/BUD23/LCMT1/ALDH9A1/AMDHD1/ALDH3B1/MAOB/DDC/CNDP1/ALDH3A2
REACTOME_PROCESSING_OF_SMDT1	16	0.773679	1.74088	0.00338072	0.0164459	0.0105466	3988	tags=69%, list=9%, signal=62%	PHB/SMDT1/MICU2/PMPCA/PMPCB/PHB2/STOML2/PARL/AFG3L2/MAIP1/MICU1
REACTOME_PURINE_RIBONUCLEOSIDE_MONOPHOSPHATE_BIOSYNTHESIS	12	0.822318	1.72916	0.00338475	0.0164459	0.0105466	2450	tags=67%, list=6%, signal=63%	ATIC/IMPDH1/IMPDH2/LHPP/ADSL/GART/PAICS/ADSS2
SWEET_KRAS_TARGETS_UP	82	-0.503658	-1.56603	0.00338541	0.0164459	0.0105466	6736	tags=52%, list=15%, signal=44%	TIMP3/NLRP1/JUNB/C1S/SGK1/SNAI1/NCK2/MATN2/ITGAV/GSDME/EPHB2/NPTX1/BHLHE40/CCL2/FLRT2/OGA/TCIM/TAGLN/P4HA2/NCF2/NUAK1/CLDN4/DENND2B/HSPB1/COL5A1/ULK1/IGFBP3/DICER1/COL1A1/DKK3/ATP2B4/FERMT2/EVL/COL7A1/TPM1/COL4A2/SPARC/SOX4/CDH4/IGFBP7/COL4A1/CADM1/TNS1
REACTOME_WNT5A_DEPENDENT_INTERNALIZATION_OF_FZD2_FZD5_AND_ROR2	13	0.80058	1.70594	0.00340124	0.0164681	0.0105608	2761	tags=62%, list=6%, signal=58%	ROR1/AP2A1/CLTA/WNT5A/AP2S1/CLTB/AP2M1/CLTC
GHANDHI_BYSTANDER_IRRADIATION_UP	83	-0.495474	-1.54321	0.00340756	0.0164681	0.0105608	4567	tags=37%, list=11%, signal=33%	POU2F2/PLEK2/MT1E/TCIM/RGS9/AHR/IL1B/IL1A/MMP10/PTGS2/SRSF12/ZC3H12C/STC1/CREB5/IL33/MT1X/C2CD4B/SAT1/LRRC8B/MCTP2/DNAJB4/C9orf72/TNFAIP3/FGF2/SERPINB2/INHBA/NFKBIZ/CXCL1/CXCL8/CXCL3/CXCL2
DACOSTA_UV_RESPONSE_VIA_ERCC3_TTD_DN	83	-0.495904	-1.54455	0.00340756	0.0164681	0.0105608	5202	tags=42%, list=12%, signal=37%	PLPP3/TMCC1/HAS2/CTIF/UBXN7/MSH3/SFMBT1/FAM193A/ITCH/CDC42BPA/AGO2/WDHD1/BTAF1/ARHGEF10/PCNT/ATXN1/PHF14/TOGARAM1/CREB5/COL1A2/ZFHX3/MALT1/RBPMS/AHDC1/NFIB/MPHOSPH9/TRIM24/ASXL1/LPAR1/SERPINB2/PLCE1/PDS5B/NECTIN3/DMD/PTPRM
DELPUECH_FOXO3_TARGETS_DN	40	-0.60971	-1.70439	0.00340756	0.0164681	0.0105608	3896	tags=50%, list=9%, signal=46%	LARS1/CEBPG/EFNB2/PITX2/PYCR1/SLC1A4/AURKA/AARS1/EXOSC8/NEK2/VEGFA/KIF22/SMC4/ZWINT/MKI67/CENPF/FOXM1/UBE2C/PRC1/NUSAP1
REACTOME_DISSOLUTION_OF_FIBRIN_CLOT	13	-0.808446	-1.74542	0.00339849	0.0164681	0.0105608	1924	tags=46%, list=4%, signal=44%	S100A10/PLAUR/SERPINB2/SERPINB8/ANXA2/SERPINF2
STEIN_ESR1_TARGETS	82	-0.503068	-1.5642	0.00343275	0.0165728	0.0106279	4580	tags=48%, list=11%, signal=43%	PNRC1/PRSS23/CDC25A/TFF1/GINS2/SOX13/KIDINS220/SLC16A1/FEN1/SGK3/CAP2/ZWILCH/CCNE2/RECQL/ABCG1/GINS3/RAB27B/HNRNPD/RRM1/CDC6/DTL/TPBG/MANEA/MCM2/MCM10/MYOF/NEMP1/MCM4/RFC4/ATAD2/MCM6/SMC4/CENPU/MCM5/NCAPG2/TIAM1/TMPO/SUSD4/SKP2
WANG_TARGETS_OF_MLL_CBP_FUSION_DN	44	0.628071	1.67532	0.00345659	0.0166706	0.0106907	3878	tags=45%, list=9%, signal=41%	G6PD/VDAC1/TRIAP1/NAA10/CCDC86/RIOX2/LACTB/UXS1/GTPBP4/STRAP/CCND2/GGCT/GLRX3/HARS1/PITRM1/IRAK1/SELENOW/TSC22D1/GABARAPL1/PSMC5
ZHAN_MULTIPLE_MYELOMA_MS_UP	49	-0.578068	-1.65689	0.00348449	0.0167879	0.0107659	4050	tags=45%, list=9%, signal=41%	TMEM176B/FAM171A1/TMEM176A/BACE2/VWA5A/RMST/DTNA/LARP6/FZD8/SPRY2/PCSK5/DSEL/MAGI1/PBX1/DSG2/FZD2/LRP12/NAP1L3/CLGN/WWC2/FGFR3/NSD2
PID_EPHA_FWDPATHWAY	34	-0.624866	-1.67574	0.00351636	0.0169241	0.0108532	4194	tags=44%, list=10%, signal=40%	ROCK1/PIK3R5/EPHA4/LYN/EFNA2/CRKL/FYN/EPHA2/PLCG1/EFNA5/CBL/SRC/EPHA6/EPHA3/EFNA1
KIM_BIPOLAR_DISORDER_OLIGODENDROCYTE_DENSITY_CORR_DN	80	-0.504306	-1.55964	0.00352534	0.0169499	0.0108698	4820	tags=26%, list=11%, signal=23%	ALDH3B2/PAX7/CYP2A13/CD72/PYY/TNF/ALPK3/CRISP3/B3GALT5/MAFK/EPHA2/ORC1/EFNA5/XRCC3/LFNG/MMP11/CADM4/SLC7A2/PFKFB4/TOP2A/IL1RAP
HADDAD_T_LYMPHOCYTE_AND_NK_PROGENITOR_DN	62	-0.554715	-1.64739	0.00361408	0.0173435	0.0111222	5730	tags=37%, list=13%, signal=32%	HGF/CFD/LGALS1/RAB31/CRIP1/LTB/TNF/GPR183/SCN3A/TRAF4/ARHGEF10/ACSL4/CDC20/RRM2/MCM4/TRIB2/TSPOAP1/CEBPD/ZWINT/KIF15/CD24/SERPINF1/VCAN
IWANAGA_E2F1_TARGETS_INDUCED_BY_SERUM	24	-0.6899	-1.74406	0.00361463	0.0173435	0.0111222	2902	tags=54%, list=7%, signal=51%	DEPDC7/HEY1/CLSPN/CEP57/PSIP1/PGM2L1/FIGNL1/FAM111A/RAD51AP1/CENPH/GGH/CENPU/HMGB2
REACTOME_PYRUVATE_METABOLISM	31	0.672653	1.66959	0.00362961	0.0173976	0.0111569	2798	tags=45%, list=6%, signal=42%	PDK4/MPC1/ME1/VDAC1/PDHX/LDHB/HAGH/DLD/PDP1/PDHA1/PDHB/PDK2/MPC2/BSG
KEGG_PHENYLALANINE_METABOLISM	18	0.755513	1.73472	0.00365151	0.0174847	0.0112127	4932	tags=56%, list=11%, signal=49%	TAT/MAOA/ALDH1A3/PRDX6/GOT2/PAH/GOT1/ALDH3B1/MAOB/DDC
PID_BARD1_PATHWAY	29	-0.653106	-1.69841	0.00366811	0.0175462	0.0112522	3437	tags=52%, list=8%, signal=48%	NBN/XRCC5/MRE11/RAD51/EWSR1/FANCC/FANCA/FANCL/BRCA1/ATM/FANCG/FANCD2/TOPBP1/CDK2/BARD1
REACTOME_METABOLISM_OF_COFACTORS	19	0.750188	1.72116	0.00367324	0.0175528	0.0112564	6235	tags=68%, list=14%, signal=59%	CALM1/COQ9/IDH1/PTS/PDSS2/COQ6/SPR/HSP90AA1/COQ5/PDSS1/COQ3/COQ2/GCHFR
WIERENGA_PML_INTERACTOME	42	0.628786	1.66262	0.00368796	0.0176052	0.01129	4876	tags=51%, list=11%, signal=45%	EEF1A1/RPL3/RPS18/EEF1G/POLDIP2/PLCB4/OAT/RPS3/RPS27/KARS1/HSPA5/ATP5F1C/ABCE1/ARF4/CTPS1/CLPX/PLEC/ABCF2/ABCF2/PRKDC/EMD/GCN1
REACTOME_POSITIVE_EPIGENETIC_REGULATION_OF_RRNA_EXPRESSION	103	0.49909	1.5408	0.00369201	0.0176066	0.0112909	5131	tags=32%, list=12%, signal=28%	H2AC6/H2BC21/H2BC12/H2AJ/MYBBP1A/POLR2F/H2BC4/POLR2E/DDX21/KAT2A/POLR2L/H2BC5/POLR1D/H4C8/POLR1C/H2BC8/H3C10/H4-16/H2AC19/POLR2K/H4C15/CD3EAP/H4C5/H2BC15/H2AC18/CHD4/H3C14/H3C1/H2AC8/POLR1E/TAF1D/H2BC7/POLR1B
ZWANG_EGF_INTERVAL_DN	218	0.421642	1.41155	0.00371501	0.0176803	0.0113382	3527	tags=22%, list=8%, signal=21%	GLRX/CDIP1/EMP2/KCNS3/RPL12/KLF9/NINJ1/ABTB2/PRKCD/SNAI2/RHOD/NDUFS7/YPEL3/MT-CYB/BCAR3/NDUFS8/HIGD2A/COQ8A/PLEKHA7/TMEM179B/RHOB/TPD52L1/TLCD1/CITED4/TMEM125/CLN3/TOMM40L/FBXO2/GABBR1/GABARAP/DAPK3/SPSB1/RAB25/PLAAT4/PARD6B/NDUFAF3/RPS6KA5/IRX3/UNC5B/OVOL2/NOB1/SELENOM/ABHD8/EIF3A/CASZ1/CEBPB/AGFG2/PLEKHH3/IFIT1
WU_CELL_MIGRATION	183	-0.406742	-1.40733	0.00371162	0.0176803	0.0113382	3509	tags=34%, list=8%, signal=31%	AGR2/EFNB2/VGLL1/SMURF2/AHNAK2/LOXL2/SOX9/KRT17/ERAP2/S100A4/IL1A/CLDN4/PTGS2/LGALS3/DCBLD2/PDGFC/FYN/CXADR/IGFBP3/KRT19/SFN/PPL/FABP5/ADIRF/MT1F/MT1X/DAPK1/CAPG/DKK3/MTUS1/RBPMS/PLIN2/GALNT3/WWTR1/CRYBG1/EMP3/LPAR1/FGF2/CDH1/TMEM30B/COL18A1/KLF5/LAMA3/COL4A2/ADAMTS1/CXCL1/MEST/AXL/TACSTD2/CDH3/CD24/PLAGL1/IGFBP7/COL4A1/VIM/GJA1/ARL4C/VCAN/FXYD3/EPB41L2/TM4SF1/FBLN1
BIOCARTA_ACE2_PATHWAY	12	-0.807903	-1.70189	0.00380191	0.0180755	0.0115916	4235	tags=50%, list=10%, signal=45%	COL4A3/COL4A4/COL4A6/AGTR1/COL4A2/COL4A1
REACTOME_INTEGRIN_CELL_SURFACE_INTERACTIONS	85	-0.512129	-1.60599	0.0038152	0.0181202	0.0116203	6237	tags=42%, list=14%, signal=36%	COL13A1/ITGB5/ITGAM/FGA/ITGAV/ITGB6/ITGAE/COMP/ITGA2/COL9A1/COL4A3/COL4A4/ITGA1/FBN1/TNC/ITGA10/COL5A1/COL4A6/AGRN/ITGA6/COL1A2/ITGB8/COL1A1/COL7A1/COL5A2/CDH1/ITGA4/COL18A1/COL16A1/COL3A1/COL2A1/COL4A2/CD47/COL4A1/KDR/COL9A2
KEGG_GAP_JUNCTION	89	-0.478441	-1.50453	0.0038499	0.0182666	0.0117142	4802	tags=38%, list=11%, signal=34%	TUBB3/RAF1/GNAS/PLCB3/ADCY6/ADRB1/PRKACB/PRKG1/TUBB2B/TUBA1C/PDGFD/ADCY2/PDGFC/SOS2/EGFR/GUCY1B1/GUCY1A1/TUBB1/SOS1/KRAS/NRAS/HTR2C/PDGFB/LPAR1/SRC/TUBA1A/MAPK7/CDK1/TUBA1B/GUCY1A2/GJA1/PDGFA/TUBB/PLCB1
BROWNE_HCMV_INFECTION_2HR_UP	40	-0.607123	-1.69715	0.0038619	0.0183049	0.0117388	6644	tags=42%, list=15%, signal=36%	GCH1/COL21A1/CFD/PTGDS/N4BP2L1/RARRES2/IRF1/VWA5A/NR4A2/IGF2/EGR1/NFKBIA/SNED1/CXCL8/CXCL3/CHRDL1/MFAP4
YAGI_AML_WITH_11Q23_REARRANGED	339	0.393009	1.36577	0.00390993	0.0185139	0.0118727	6336	tags=39%, list=15%, signal=33%	GNAI1/EMP2/CTDSPL/IDH3A/ATP6V1E1/PRDX1/CCND3/CD81/COX5B/TACC1/GDF7/DDT/SDHB/CLTA/HSPG2/SLC25A13/TTLL12/FOLR1/ATP5PD/ADAM15/GCLC/CS/WARS1/POP5/EIF2B4/STS/TSPAN4/MRPL33/PPP1R7/NDUFB3/AKR1B1/JTB/NDUFS6/PPID/OSTF1/PIK3CD/ENPP4/CCND2/LAMTOR5/MAPKAPK3/MLF2/PSMD7/NARS1/SRSF8/EIF2S2/CARS1/SNX17/TMC6/DEXI/CALCOCO2/PREP/GMPR/LRP10/UTP18/ADCY9/ADAM23/NDUFS3/ABHD3/PVR/PPP1CA/NUDT3/TPD52L2/GTF2E2/GLUL/IDS/OVO…
REACTOME_NS1_MEDIATED_EFFECTS_ON_HOST_PATHWAYS	41	-0.612257	-1.7164	0.00391511	0.0185196	0.0118765	5399	tags=46%, list=12%, signal=41%	NUP35/POM121/AAAS/NUP93/POM121C/KPNA5/NUP85/NUP37/NUP160/NUP58/EIF2AK2/KPNA2/NUP54/NUP153/NUP62/TPR/NUP107/NUP210/NDC1
[truncated: 346 more rows]

## Sheet: mut_vs_wt_d70_H
ID	setSize	enrichmentScore	NES	pvalue	p.adjust	qvalues	rank	leading_edge	core_enrichment
[truncated: 34 more rows]

## Sheet: mut_vs_wt_d70_C3
ID	setSize	enrichmentScore	NES	pvalue	p.adjust	qvalues	rank	leading_edge	core_enrichment
[truncated: 1,604 more rows]
