# Supplementary material for: GSK3 inhibition rescues growth and telomere dysfunction in dyskeratosis congenita iPSC-derived type II alveolar epithelial cells
Source: eLife. 2022 May 13;11:e64430. doi: 10.7554/eLife.64430 (PMC9200405; doi:10.7554/eLife.64430)
Supplement: Supplementary file 2. — These tables provide the unedited output of the IPA. The summary tab lists metadata associated with the analysis. The ‘analysis ready molecules’ lists the differentially expressed genes that differed in expression greater than twofold and were associated with an adjusted p-value < 0.05 from D70 mutant iAT2 cells (DEG list). The ‘canonical pathways tab’ lists pathways curated from the literature and the p-value for enrichment using the DEG list used in the IPA. The ‘upstream regulators’ tab lists the transcription factors, cytokines, and other genetic regulators whose target genes are in the DEG list. ‘Causal networks’ seeks to build a regulatory network based off of the ‘upstream regulators’ to identify master regulators of the DEG list. For more information on interpreting ingenuity analysis results see Krämer et al., 2014. [file elife-64430-supp2.xlsx]

## Sheet: Summary
¬© 2000-2020 QIAGEN. All rights reserved.
Analysis Details for My Projects->20200928 Brad Johnson->mut vs wt d702factor 2x q05
Workspace	My Projects
Project	20200928 Brad Johnson
Analysis	mut vs wt d702factor 2x q05
Date	Mon Sep 28 13:49:53 PDT 2020
Analysis ID	19780833
Analysis Settings
Cutoff before duplicate resolution	TRUE
Resolve duplicate on	Expression logfoldchange
Color using	Expression logfoldchange
Cutoff for Expression logfoldchange	down regulated -1.0 and up regulated 1.0
Cutoff for Expression pvalue	--
Cutoff for Expression qvalue	0.05
Reference set	Ingenuity Knowledge Base (Genes Only)
Relationship to include	Direct and Indirect
Includes Endogenous Chemicals	Yes
Optional Analyses	My Pathways My List
Filter Summary
Consider only molecules and/or relationships where
(confidence = Experimentally Observed) AND
(mol. types = biologic drug OR canonical pathway OR chemical - endogenous mammalian OR chemical - endogenous non-mammalian OR chemical - kinase inhibitor OR chemical - other OR chemical - protease inhibitor OR chemical drug OR chemical reagent OR chemical toxicant OR complex OR cytokine OR disease OR enzyme OR function OR fusion gene/product OR G-protein coupled receptor OR group OR growth factor…

## Sheet: Analysis Ready Molecules
Analysis Ready Molecules for My Projects->20200928 Brad Johnson->mut vs wt d702factor 2x q05
ID	Symbol	Expr Log Ratio	Expr p-value	Expr False Discovery Rate (q-value)
ENSG00000096088	PGC	2.06442	2.08972e-188	4.94428e-184
ENSG00000198825	INPP5F	-2.22349	6.30312e-162	7.4566e-158
ENSG00000075673	ATP12A	2.79499	6.54471e-158	5.16159e-154
ENSG00000181019	NQO1	1.8329	1.70719e-120	1.0098e-116
ENSG00000004799	PDK4	1.657	1.38351e-116	6.54677e-113
ENSG00000146122	DAAM2	2.18579	5.5399e-111	2.18457e-107
ENSG00000105852	PON3	1.9541	4.12648e-97	1.39475e-93
ENSG00000144668	ITGA9	1.44426	1.28881e-95	3.81165e-92
ENSG00000172264	MACROD2	1.40849	1.08314e-87	2.84747e-84
ENSG00000170558	CDH2	-1.4298	1.92822e-87	4.56217e-84
ENSG00000173535	TNFRSF10C	1.33286	2.47878e-85	5.33163e-82
ENSG00000117519	CNN3	-1.56779	3.63273e-83	7.16253e-80
ENSG00000048392	RRM2B	1.16843	2.90466e-77	5.28649e-74
ENSG00000166165	CKB	-1.80762	1.28362e-76	2.16931e-73
ENSG00000115718	PROC	1.21846	6.12362e-76	9.65899e-73
ENSG00000173432	SAA1	3.12375	9.00236e-74	1.33122e-70
ENSG00000214357	NEURL1B	-2.11792	1.5179e-73	2.11256e-70
ENSG00000134827	TCN1	2.84999	6.32608e-71	8.31528e-68
ENSG00000111348	ARHGDIB	1.40848	1.36822e-68	1.70379e-65
ENSG00000156284	CLDN8	2.0848	5.29501e-66	5.96571e-63
ENSG00000109255	NMU	2.13495	7.68017e-64	8.25967e-61
ENSG00000265369	PCAT18	2.59155	9.60998e-64	9.88574e-61
ENSG00000117122	MFAP2	-2.4672	1.02363e-63	1.00913e-60
ENSG00000113657	DPYSL3	-2.31722	4.46386e-63	4.2246e-60
ENSG00000080854	IGSF9B	3.29988	1.80291e-61	1.64065e-58
ENSG00000198650	TAT	2.92146	1.00541e-60	8.81035e-58
ENSG00000196208	GREB1	1.47737	6.55424e-60	5.53833e-57
ENSG00000119771	KLHL29	2.00686	6.29805e-59	5.13834e-56
ENSG00000168918	INPP5D	2.17383	1.1658e-58	9.1943e-56
ENSG00000147804	SLC39A4	-2.57228	7.16514e-57	5.46862e-54
ENSG00000173221	GLRX	1.13272	2.45225e-56	1.81313e-53
ENSG00000180801	ARSJ	-1.31426	3.3196e-56	2.38005e-53
ENSG00000009765	IYD	1.323	8.21796e-56	5.71873e-53
ENSG00000124762	CDKN1A	1.15632	1.62336e-55	1.06691e-52
ENSG00000150594	ADRA2A	1.60111	2.4665e-55	1.57723e-52
ENSG00000256612	CYP2B7P	1.95619	7.98167e-55	4.84221e-52
ENSG00000106278	PTPRZ1	-2.00826	8.87988e-55	5.25245e-52
ENSG00000049089	COL9A2	-1.85633	1.66035e-54	9.58142e-52
ENSG00000080493	SLC4A4	-1.41577	6.6122e-54	3.72487e-51
ENSG00000251095	LOC105377329	1.36267	7.9861e-54	4.39421e-51
ENSG00000268916	CSAG2/CSAG3	3.70299	6.14239e-53	3.22953e-50
ENSG00000128052	KDR	-2.27466	7.33112e-53	3.77075e-50
ENSG00000065320	NTN1	-2.28726	1.07409e-52	5.40702e-50
ENSG00000203837	PNLIPRP3	2.41469	1.11083e-52	5.47547e-50
ENSG00000182168	UNC5C	-2.29166	1.06064e-51	5.12137e-49
ENSG00000166482	MFAP4	-2.62862	1.18875e-51	5.62517e-49
ENSG00000102760	RGCC	1.60639	1.3181e-51	6.11493e-49
ENSG00000103876	FAH	1.09386	7.75037e-51	3.52642e-48
ENSG00000253846	PCDHGA10	-1.06193	1.16149e-50	5.18505e-48
ENSG00000135046	ANXA1	-1.40387	1.48626e-50	6.51201e-48
ENSG00000145358	DDIT4L	2.1547	1.51843e-49	6.532e-47
ENSG00000205592	MUC19	2.60124	2.25712e-49	9.53631e-47
ENSG00000131080	EDA2R	1.23435	3.2607e-49	1.35348e-46
ENSG00000233622	CYP2T1P	1.17633	6.38795e-48	2.60584e-45
ENSG00000168874	ATOH8	1.11992	8.78755e-48	3.52396e-45
ENSG00000077942	FBLN1	-1.76518	3.62304e-47	1.3826e-44
ENSG00000186918	ZNF395	-1.49992	7.00295e-47	2.63e-44
ENSG00000188488	SERPINA5	1.23943	1.24209e-46	4.59186e-44
ENSG00000162998	FRZB	-5.84825	1.70227e-46	6.10237e-44
ENSG00000103260	METRN	1.30455	2.30297e-46	8.13257e-44
ENSG00000250479	CHCHD10	1.1271	1.99014e-45	6.9245e-43
ENSG00000168306	ACOX2	1.05014	5.29346e-45	1.81512e-42
ENSG00000185304	RGPD4 (includes others)	-4.26363	3.16255e-44	1.05389e-41
ENSG00000271303	SRXN1	1.01268	5.0919e-44	1.62803e-41
ENSG00000198133	TMEM229B	3.05206	5.97186e-44	1.88392e-41
ENSG00000198585	NUDT16	1.03874	6.5527e-44	2.03996e-41
ENSG00000197142	ACSL5	1.80574	9.6899e-44	2.97744e-41
ENSG00000165816	VWA2	-1.18758	1.6699e-43	5.06536e-41
ENSG00000151715	TMEM45B	-1.9676	1.94767e-43	5.83316e-41
ENSG00000182621	PLCB1	-1.18829	1.02274e-42	2.95097e-40
ENSG00000089486	CDIP1	1.09796	3.22333e-42	9.18844e-40
ENSG00000163430	FSTL1	-1.21961	1.05259e-41	2.92992e-39
ENSG00000128656	CHN1	-1.25188	8.38651e-41	2.25483e-38
ENSG00000164120	HPGD	1.18997	1.32974e-40	3.49575e-38
ENSG00000172667	ZMAT3	1.01744	1.89297e-40	4.92171e-38
ENSG00000128602	SMO	-2.0627	2.28736e-40	5.8825e-38
ENSG00000129757	CDKN1C	-2.5233	2.35004e-40	5.97871e-38
ENSG00000178445	GLDC	1.66494	3.87833e-40	9.76183e-38
ENSG00000156113	KCNMA1	2.36422	5.37439e-40	1.32456e-37
ENSG00000142973	CYP4B1	1.3614	1.84998e-39	4.37704e-37
ENSG00000139055	ERP27	1.19142	2.48139e-39	5.81285e-37
ENSG00000155622	XAGE2	2.05467	3.07533e-39	7.13355e-37
ENSG00000198074	AKR1B10	1.81111	5.53341e-39	1.24686e-36
ENSG00000253305	PCDHGB6	-1.2016	6.08324e-39	1.35782e-36
ENSG00000121895	TMEM156	1.95498	1.94353e-38	4.29756e-36
ENSG00000187134	AKR1C1/AKR1C2	1.56967	2.78206e-37	5.77399e-35
ENSG00000137766	UNC13C	-2.43407	3.11994e-37	6.41893e-35
ENSG00000113083	LOX	-2.93957	3.58868e-37	7.31967e-35
ENSG00000169908	TM4SF1	-1.30304	4.1206e-37	8.33277e-35
ENSG00000079308	TNS1	-1.25354	4.69716e-37	9.41821e-35
ENSG00000146197	SCUBE3	-1.42438	5.37211e-37	1.0681e-34
ENSG00000288022	AC117488.1	2.50423	1.66813e-36	3.26182e-34
ENSG00000196502	SULT1A1	1.18279	2.17289e-36	4.21399e-34
ENSG00000156253	RWDD2B	-5.34541	4.17689e-36	7.96977e-34
ENSG00000152952	PLOD2	-1.23665	5.48873e-36	1.03891e-33
ENSG00000082556	OPRK1	1.58021	6.55217e-36	1.21113e-33
ENSG00000183087	GAS6	1.37497	2.75993e-35	5.02307e-33
ENSG00000107796	ACTA2	1.22049	2.86376e-35	5.17226e-33
ENSG00000154856	APCDD1	-1.95836	2.91903e-35	5.23213e-33
ENSG00000081041	CXCL2	-1.20042	3.39037e-35	6.03128e-33
ENSG00000156127	BATF	1.5235	3.633e-35	6.41468e-33
ENSG00000254687	RP11_162D93	3.55744	7.07461e-35	1.23989e-32
ENSG00000026751	SLAMF7	1.76528	1.51175e-34	2.57324e-32
ENSG00000286042	LCAL1	1.81027	2.43396e-34	4.08422e-32
ENSG00000081189	MEF2C	-1.58439	4.54515e-34	7.47224e-32
ENSG00000198732	SMOC1	1.46278	5.50918e-34	8.98946e-32
ENSG00000181588	MEX3D	-1.0527	8.35414e-34	1.34462e-31
ENSG00000104419	NDRG1	-3.04945	1.90748e-33	3.02892e-31
ENSG00000175040	CHST2	-1.43355	8.54529e-33	1.32145e-30
ENSG00000268606	MAGEA2/MAGEA2B	3.55376	1.72463e-32	2.63257e-30
ENSG00000136235	GPNMB	-1.02347	7.36853e-32	1.10341e-29
ENSG00000128591	FLNC	-2.73925	1.37282e-31	2.04282e-29
ENSG00000111424	VDR	1.49934	2.43747e-31	3.53807e-29
ENSG00000168785	TSPAN5	-1.33586	2.87835e-31	4.10251e-29
ENSG00000112561	TFEB	1.19344	3.6233e-31	5.13336e-29
ENSG00000155792	DEPTOR	1.1574	4.16447e-31	5.86496e-29
ENSG00000270885	RASL10B	1.8149	5.02408e-31	7.03371e-29
ENSG00000145681	HAPLN1	1.93212	7.69193e-31	1.06428e-28
ENSG00000145908	ZNF300	-1.02925	1.74082e-30	2.3808e-28
ENSG00000099194	SCD	-1.02306	3.67052e-30	4.77168e-28
ENSG00000155926	SLA	-2.78796	1.42032e-29	1.80671e-27
ENSG00000186854	TRABD2A	1.51635	2.00578e-29	2.5378e-27
ENSG00000089356	FXYD3	-1.19798	2.02495e-29	2.54842e-27
ENSG00000214049	UCA1	2.95889	4.8257e-29	6.04106e-27
ENSG00000187210	GCNT1	-1.86422	6.73265e-29	8.34003e-27
ENSG00000150893	FREM2	-1.17215	1.83261e-28	2.21431e-26
ENSG00000084110	HAL	1.31751	2.7244e-28	3.25552e-26
ENSG00000134755	DSC2	-1.48957	4.25248e-28	5.03068e-26
ENSG00000140465	CYP1A1	3.93806	4.32189e-28	5.08736e-26
ENSG00000196083	IL1RAP	-1.37324	4.38607e-28	5.13735e-26
ENSG00000247626	MARS2	1.01576	6.83726e-28	7.92988e-26
ENSG00000237649	KIFC1	-1.00386	7.04377e-28	8.12954e-26
ENSG00000145545	SRD5A1	1.27018	7.97414e-28	9.11441e-26
ENSG00000153993	SEMA3D	-2.63772	1.85225e-27	2.07697e-25
ENSG00000171476	HOPX	1.12599	2.9185e-27	3.24186e-25
ENSG00000111913	RIPOR2	1.7837	3.12271e-27	3.45249e-25
ENSG00000143847	PPFIA4	-3.06094	3.987e-27	4.34712e-25
ENSG00000279208	BP_21264C11	4.11412	4.46978e-27	4.85115e-25
ENSG00000150471	ADGRL3	-3.73352	5.72198e-27	6.15373e-25
ENSG00000146250	PRSS35	-1.21891	9.73967e-27	1.03337e-24
ENSG00000126733	DACH2	3.06869	1.16938e-26	1.23515e-24
ENSG00000155066	PROM2	1.16975	3.49062e-26	3.63824e-24
ENSG00000175265	GOLGA8A/GOLGA8B	-1.00305	3.78775e-26	3.93062e-24
ENSG00000153902	LGI4	-2.97679	4.01563e-26	4.1489e-24
ENSG00000075213	SEMA3A	-1.89159	4.14669e-26	4.26569e-24
ENSG00000157350	ST3GAL2	-1.44032	4.74259e-26	4.85756e-24
ENSG00000106025	TSPAN12	-1.005	7.67071e-26	7.78922e-24
ENSG00000152256	PDK1	-1.62226	7.72624e-26	7.81209e-24
ENSG00000183853	KIRREL1	-1.17958	8.50438e-26	8.56228e-24
ENSG00000197872	CYRIA	1.4591	1.19256e-25	1.18059e-23
ENSG00000121797	CCRL2	2.68676	2.17051e-25	2.10468e-23
ENSG00000127084	FGD3	1.09575	6.33375e-25	5.85377e-23
ENSG00000121858	TNFSF10	-1.71668	6.37369e-25	5.86777e-23
ENSG00000182963	GJC1	-2.04137	6.43451e-25	5.87801e-23
ENSG00000096696	DSP	-1.26352	6.81662e-25	6.20312e-23
ENSG00000114268	PFKFB4	-1.56149	8.45072e-25	7.66069e-23
ENSG00000154736	ADAMTS5	-3.6581	1.27208e-24	1.14005e-22
ENSG00000172081	MOB3A	-1.02333	1.28049e-24	1.14326e-22
ENSG00000086696	HSD17B2	1.51803	1.59046e-24	1.39889e-22
ENSG00000182985	CADM1	-1.22187	1.90937e-24	1.66087e-22
ENSG00000162687	KCNT2	-1.60994	2.16709e-24	1.86448e-22
ENSG00000163734	CXCL3	-1.49793	2.70711e-24	2.31228e-22
ENSG00000164946	FREM1	-1.38832	3.88892e-24	3.27444e-22
ENSG00000172638	EFEMP2	-1.17576	5.48658e-24	4.57086e-22
ENSG00000131370	SH3BP5	1.11162	6.24535e-24	5.1486e-22
ENSG00000197930	ERO1A	-1.16325	8.60756e-24	7.02258e-22
ENSG00000105290	APLP1	1.10307	1.29131e-23	1.03873e-21
ENSG00000138336	TET1	-1.43834	1.29951e-23	1.03873e-21
ENSG00000148735	PLEKHS1	1.68613	1.44951e-23	1.15085e-21
ENSG00000185008	ROBO2	-1.66922	1.69859e-23	1.33962e-21
ENSG00000102109	PCSK1N	1.19094	1.73884e-23	1.36681e-21
ENSG00000158825	CDA	2.88189	2.81491e-23	2.19082e-21
ENSG00000286406	AC138776.1	3.91374	4.08272e-23	3.15677e-21
ENSG00000249859	PVT1	1.10818	4.40602e-23	3.39565e-21
ENSG00000156804	FBXO32	1.12074	5.35612e-23	4.10116e-21
ENSG00000269190	FBXO17	-1.31996	5.74019e-23	4.38106e-21
ENSG00000141639	MAPK4	-1.45172	6.42188e-23	4.86992e-21
ENSG00000240875	LINC00886	1.58404	6.63638e-23	5.01651e-21
ENSG00000106992	AK1	1.53639	7.48534e-23	5.62232e-21
ENSG00000166603	MC4R	2.22495	8.2462e-23	6.15473e-21
ENSG00000129521	EGLN3	-2.60202	8.75383e-23	6.49265e-21
ENSG00000144331	ZNF385B	1.03497	1.03875e-22	7.642e-21
ENSG00000163239	TDRD10	1.73046	2.8563e-22	2.04169e-20
ENSG00000152932	RAB3C	1.73408	2.94651e-22	2.09352e-20
ENSG00000054598	FOXC1	-1.59344	2.99738e-22	2.12329e-20
ENSG00000157064	NMNAT2	1.79533	3.39567e-22	2.37697e-20
ENSG00000134548	SPX	-1.42029	4.07978e-22	2.83905e-20
ENSG00000244694	PTCHD4	1.38331	4.37304e-22	3.02533e-20
ENSG00000108448	TRIM16L	1.23472	4.54636e-22	3.13606e-20
ENSG00000197852	INKA2	1.18204	4.72875e-22	3.24297e-20
ENSG00000248905	FMN1	1.16838	4.98422e-22	3.40828e-20
ENSG00000197165	SULT1A2	1.0831	5.22215e-22	3.55046e-20
ENSG00000165644	COMTD1	1.08094	7.20701e-22	4.76307e-20
ENSG00000111674	ENO2	-1.70547	8.60282e-22	5.62273e-20
ENSG00000152661	GJA1	-1.01212	1.01875e-21	6.6401e-20
ENSG00000152270	PDE3B	-1.18238	1.03517e-21	6.72863e-20
ENSG00000181458	TMEM45A	-1.03849	1.32518e-21	8.5666e-20
ENSG00000026025	VIM	-2.79364	1.36844e-21	8.82214e-20
ENSG00000021826	CPS1	1.36474	1.66417e-21	1.0613e-19
ENSG00000185585	OLFML2A	-1.29014	2.45115e-21	1.5424e-19
ENSG00000136490	LIMD2	-2.4736	2.68563e-21	1.67657e-19
ENSG00000162426	SLC45A1	1.15838	3.76255e-21	2.33042e-19
ENSG00000163661	PTX3	-1.64309	3.80439e-21	2.35018e-19
ENSG00000121005	CRISPLD1	-1.37225	4.29444e-21	2.63229e-19
ENSG00000100979	PLTP	-1.03927	4.28351e-21	2.63229e-19
ENSG00000135097	MSI1	-2.41941	4.90734e-21	2.98477e-19
ENSG00000221923	ZNF880	-1.0585	5.10325e-21	3.09597e-19
ENSG00000262094	AC1390995	4.60008	5.67983e-21	3.41078e-19
ENSG00000084453	SLCO1A2	-2.0927	7.78387e-21	4.60416e-19
ENSG00000143147	GPR161	-1.01943	9.60981e-21	5.61403e-19
ENSG00000147573	TRIM55	2.07003	1.14787e-20	6.67287e-19
ENSG00000135318	NT5E	1.17699	1.35672e-20	7.82924e-19
ENSG00000156869	FRRS1	-1.11714	1.37518e-20	7.91646e-19
ENSG00000142552	RCN3	-1.27316	2.84741e-20	1.56674e-18
ENSG00000281398	SNHG4	1.00388	4.08457e-20	2.21654e-18
ENSG00000084674	APOB	1.45716	4.64418e-20	2.49164e-18
ENSG00000168703	WFDC12	2.9964	7.87863e-20	4.14241e-18
ENSG00000184254	ALDH1A3	3.03903	9.61785e-20	5.02336e-18
ENSG00000188626	GOLGA8K (includes others)	-2.09457	9.75258e-20	5.07134e-18
ENSG00000285972	CERNA2	-1.49749	1.12544e-19	5.81398e-18
ENSG00000278044	XXBAC_B33L1912	1.47996	1.39216e-19	7.0988e-18
ENSG00000152402	GUCY1A2	-3.50529	1.88829e-19	9.46547e-18
ENSG00000189058	APOD	1.43241	2.21002e-19	1.10082e-17
ENSG00000126759	CFP	2.71318	2.28624e-19	1.13639e-17
ENSG00000113249	HAVCR1	-1.2796	2.61203e-19	1.2929e-17
ENSG00000179593	ALOX15B	1.12272	2.92585e-19	1.43324e-17
ENSG00000179981	TSHZ1	-1.78709	3.22422e-19	1.56643e-17
ENSG00000244067	GSTA2	2.04965	3.36031e-19	1.6292e-17
ENSG00000116774	OLFML3	-1.01407	3.73419e-19	1.80677e-17
ENSG00000163453	IGFBP7	-1.09035	4.44387e-19	2.14139e-17
ENSG00000113389	NPR3	-1.12059	4.69922e-19	2.25524e-17
ENSG00000040731	CDH10	-1.30567	4.93928e-19	2.36087e-17
ENSG00000156299	TIAM1	-1.15939	5.09661e-19	2.42627e-17
ENSG00000273361	RP11_378A132	-1.86114	5.34852e-19	2.53092e-17
ENSG00000196968	FUT11	-1.00349	1.21848e-18	5.53344e-17
ENSG00000156234	CXCL13	-1.5314	1.26172e-18	5.71311e-17
ENSG00000229967	MAGEA4-AS1	4.33477	1.30765e-18	5.90439e-17
ENSG00000147381	MAGEA4	4.59055	1.63839e-18	7.314e-17
ENSG00000145147	SLIT2	-1.36011	2.34301e-18	1.02659e-16
ENSG00000279117	CTD_2562J176	1.19286	2.58195e-18	1.12503e-16
ENSG00000123843	C4BPB	1.36474	2.97526e-18	1.29402e-16
ENSG00000081138	CDH7	-1.40901	3.12685e-18	1.35337e-16
ENSG00000145284	SCD5	-1.16069	3.28731e-18	1.4193e-16
ENSG00000111912	NCOA7	-1.02917	3.52072e-18	1.5118e-16
ENSG00000091622	PITPNM3	-1.25989	3.54994e-18	1.52159e-16
ENSG00000249242	TMEM150C	-1.16796	4.18395e-18	1.78044e-16
ENSG00000128011	LRFN1	1.80363	4.8588e-18	2.0602e-16
ENSG00000185518	SV2B	2.6481	5.59987e-18	2.36595e-16
ENSG00000248583	RP11_241F151	3.69846	6.03897e-18	2.53337e-16
ENSG00000128262	POM121L9P	1.46616	6.55592e-18	2.74051e-16
ENSG00000134363	FST	1.21231	7.33042e-18	3.04277e-16
ENSG00000147036	LANCL3	-1.50931	8.87125e-18	3.65033e-16
ENSG00000253452	RP11_473J61	1.11073	9.86907e-18	4.0259e-16
ENSG00000177181	RIMKLA	-2.24323	1.0026e-17	4.08288e-16
ENSG00000140279	DUOX2	-2.96428	1.14654e-17	4.64505e-16
ENSG00000272398	CD24	-1.08627	1.19428e-17	4.81376e-16
ENSG00000134532	SOX5	-1.25928	1.53204e-17	6.08187e-16
ENSG00000138061	CYP1B1	1.13238	1.96303e-17	7.74089e-16
ENSG00000112175	BMP5	-3.06557	2.30253e-17	9.01953e-16
ENSG00000102575	ACP5	1.05505	2.61658e-17	1.01656e-15
ENSG00000123700	KCNJ2	1.00037	2.66393e-17	1.03325e-15
ENSG00000163808	KIF15	-1.1657	3.22241e-17	1.24173e-15
ENSG00000171428	NAT1	1.15897	3.28254e-17	1.26079e-15
ENSG00000172059	KLF11	-1.07214	4.17623e-17	1.59886e-15
ENSG00000162804	SNED1	-1.79197	4.99286e-17	1.87808e-15
ENSG00000245750	DRAIC	1.01021	5.4781e-17	2.05733e-15
ENSG00000268894	PLCE1-AS1	1.41145	6.14168e-17	2.28478e-15
ENSG00000127329	PTPRB	-3.01795	6.13879e-17	2.28478e-15
ENSG00000187720	THSD4	1.13094	6.399e-17	2.37677e-15
ENSG00000285043	LOC112694756	-1.31661	7.50458e-17	2.77002e-15
ENSG00000186198	SLC51B	1.53038	7.57476e-17	2.79157e-15
ENSG00000254535	PABPC4L	-1.47401	9.86317e-17	3.61243e-15
ENSG00000106536	POU6F2	-1.00343	1.00684e-16	3.6819e-15
ENSG00000196562	SULF2	1.8748	1.12348e-16	4.08948e-15
ENSG00000114812	VIPR1	1.09253	1.24524e-16	4.4912e-15
ENSG00000213759	UGT2B11	1.5017	1.25422e-16	4.51673e-15
ENSG00000081479	LRP2	-3.80862	1.27928e-16	4.59998e-15
ENSG00000256969	RP11_320N72	2.2577	1.36549e-16	4.88765e-15
ENSG00000286033	CR381670.2	3.78457	1.37687e-16	4.92095e-15
ENSG00000255545	LOC283177	2.97761	1.42037e-16	5.06115e-15
ENSG00000099256	PRTFDC1	-1.13959	1.4606e-16	5.19666e-15
ENSG00000244280	ECEL1P2	1.30848	1.74858e-16	6.17483e-15
ENSG00000108244	KRT23	1.63079	1.76452e-16	6.22184e-15
ENSG00000122884	P4HA1	-1.07363	2.13965e-16	7.49986e-15
ENSG00000077943	ITGA8	1.13267	2.28728e-16	7.95838e-15
ENSG00000177398	UMODL1	-4.38232	2.52866e-16	8.77244e-15
ENSG00000176153	GPX2	1.53776	3.2568e-16	1.11675e-14
ENSG00000278318	ZNF229	-5.54801	4.15167e-16	1.40527e-14
ENSG00000047457	CP	-4.63419	4.71693e-16	1.58526e-14
ENSG00000111452	ADGRD1	1.31784	5.46454e-16	1.82357e-14
ENSG00000166394	CYB5R2	-1.14452	6.00223e-16	2.00018e-14
ENSG00000167880	EVPL	-1.44405	7.87546e-16	2.58796e-14
ENSG00000249364	LOC101928858	1.48529	9.56281e-16	3.11648e-14
ENSG00000233725	NRAD1	1.92387	1.02464e-15	3.33007e-14
ENSG00000005108	THSD7A	1.40967	1.02723e-15	3.33391e-14
ENSG00000026950	BTN3A1	-1.07931	1.08992e-15	3.51329e-14
ENSG00000168481	LGI3	2.00952	1.29228e-15	4.09421e-14
ENSG00000105866	SP4	-1.11677	1.29263e-15	4.09421e-14
ENSG00000253686	LINC01484	1.8827	1.37341e-15	4.33845e-14
ENSG00000105137	SYDE1	-1.61618	1.54647e-15	4.8721e-14
ENSG00000140297	GCNT3	1.13752	1.71251e-15	5.37373e-14
ENSG00000169760	NLGN1	-1.91908	1.72612e-15	5.40926e-14
ENSG00000141655	TNFRSF11A	-1.17126	1.8591e-15	5.79529e-14
ENSG00000249307	LINC01088	2.05302	1.99623e-15	6.18205e-14
ENSG00000206159	GYG2P1	3.55474	2.21189e-15	6.80538e-14
ENSG00000146021	KLHL3	-1.00094	2.26046e-15	6.93677e-14
ENSG00000139508	SLC46A3	1.26928	2.33364e-15	7.14849e-14
ENSG00000019549	SNAI2	1.64075	2.50419e-15	7.65494e-14
ENSG00000137726	FXYD6	-2.84129	2.65072e-15	8.09238e-14
ENSG00000144452	ABCA12	1.06684	2.66091e-15	8.10258e-14
ENSG00000174502	SLC26A9	1.03837	2.72934e-15	8.30028e-14
ENSG00000105929	ATP6V0A4	1.04835	2.92114e-15	8.84946e-14
ENSG00000129596	CDO1	-1.74833	2.93453e-15	8.87865e-14
ENSG00000111801	BTN3A3	-1.30215	3.08635e-15	9.27866e-14
ENSG00000142102	PGGHG	-1.42892	3.25668e-15	9.74122e-14
ENSG00000100628	ASB2	-1.97436	3.43407e-15	1.02459e-13
ENSG00000173262	SLC2A14	-2.1664	4.72178e-15	1.39472e-13
ENSG00000187951	LOC100288637	-1.15825	4.81835e-15	1.4197e-13
ENSG00000214193	SH3D21	-1.04143	5.06194e-15	1.48777e-13
ENSG00000123609	NMI	-1.13909	5.23563e-15	1.53501e-13
ENSG00000225783	MIAT	-1.5776	6.38148e-15	1.85486e-13
ENSG00000151962	RBM46	-4.75618	6.4589e-15	1.87506e-13
ENSG00000198734	F5	1.77404	7.44759e-15	2.1394e-13
ENSG00000235169	SMIM1	1.0263	7.57525e-15	2.17249e-13
ENSG00000108001	EBF3	2.13019	7.99253e-15	2.28662e-13
ENSG00000086289	EPDR1	1.28361	8.20321e-15	2.33841e-13
ENSG00000162373	BEND5	-1.41274	9.483e-15	2.64897e-13
ENSG00000133019	CHRM3	-1.49085	1.01824e-14	2.82103e-13
ENSG00000137440	FGFBP1	-2.20401	1.08093e-14	2.98771e-13
ENSG00000057657	PRDM1	1.42831	1.23226e-14	3.37836e-13
ENSG00000180347	ITPRID1	2.85719	1.35744e-14	3.70012e-13
ENSG00000286339	Z99496.2	2.26931	1.36919e-14	3.72785e-13
ENSG00000184898	RBM43	-1.02351	1.40594e-14	3.82351e-13
ENSG00000184985	SORCS2	-1.16756	1.58752e-14	4.29756e-13
ENSG00000093134	VNN3	-1.95434	2.2086e-14	5.87801e-13
ENSG00000144395	CCDC150	-1.12646	2.54309e-14	6.67069e-13
ENSG00000025708	TYMP	-1.04523	2.57496e-14	6.74679e-13
ENSG00000109846	CRYAB	1.40867	2.58873e-14	6.77537e-13
ENSG00000186193	SAPCD2	-1.0461	3.10835e-14	8.03754e-13
ENSG00000155849	ELMO1	1.31036	3.48091e-14	8.93258e-13
ENSG00000119866	BCL11A	-1.08318	3.76042e-14	9.62896e-13
ENSG00000142449	FBN3	-3.42132	4.01352e-14	1.02328e-12
ENSG00000180875	GREM2	-4.76591	4.05352e-14	1.03236e-12
ENSG00000273066	RP11_216L1319	-2.6322	4.47126e-14	1.13024e-12
ENSG00000130600	H19	1.26056	4.56332e-14	1.15228e-12
ENSG00000099840	IZUMO4	-1.1778	4.85093e-14	1.22229e-12
ENSG00000169245	CXCL10	2.20076	5.04134e-14	1.26354e-12
ENSG00000080224	EPHA6	-2.00779	5.19293e-14	1.30016e-12
ENSG00000103253	HAGHL	1.01436	5.24736e-14	1.31239e-12
ENSG00000149021	SCGB1A1	1.03174	5.52349e-14	1.37709e-12
ENSG00000117724	CENPF	-1.04229	6.52987e-14	1.60767e-12
ENSG00000203867	RBM20	1.19557	7.63457e-14	1.86798e-12
ENSG00000169992	NLGN2	-1.2249	7.77106e-14	1.89745e-12
ENSG00000154734	ADAMTS1	-1.35006	7.88397e-14	1.92106e-12
ENSG00000146038	DCDC2	-1.03235	9.57099e-14	2.31544e-12
ENSG00000253821	RP11_246K151	3.42415	9.60501e-14	2.32129e-12
ENSG00000283646	LINC02009	2.09374	1.1452e-13	2.74245e-12
ENSG00000178115	GOLGA8Q	-1.71407	1.22389e-13	2.92498e-12
ENSG00000198780	FAM169A	-1.33696	1.621e-13	3.83145e-12
ENSG00000162745	OLFML2B	-1.27947	1.87951e-13	4.40725e-12
ENSG00000120896	SORBS3	-1.10036	1.95895e-13	4.58444e-12
ENSG00000275216	RP11_54H74	1.70501	2.05915e-13	4.81419e-12
ENSG00000122694	GLIPR2	-1.12792	2.93706e-13	6.73361e-12
ENSG00000232434	AJM1	-1.29489	3.46163e-13	7.89039e-12
ENSG00000145536	ADAMTS16	-1.97918	3.50099e-13	7.94946e-12
ENSG00000132846	ZBED3	-1.10192	3.50035e-13	7.94946e-12
ENSG00000112541	PDE10A	-1.633	3.84683e-13	8.70967e-12
ENSG00000235501	LOC729970	-1.48422	3.9044e-13	8.82313e-12
ENSG00000226733	LOC100505985	1.19642	5.22102e-13	1.16208e-11
ENSG00000133083	DCLK1	-1.08516	5.32577e-13	1.18206e-11
ENSG00000151117	TMEM86A	1.15173	5.49903e-13	1.21595e-11
ENSG00000169174	PCSK9	-1.76254	5.85355e-13	1.28713e-11
ENSG00000170214	ADRA1B	1.24592	6.21559e-13	1.36042e-11
ENSG00000179598	PLD6	-1.74404	6.4589e-13	1.40976e-11
ENSG00000021645	NRXN3	-1.09919	6.49206e-13	1.41438e-11
ENSG00000188505	NCCRP1	1.09644	7.11795e-13	1.54505e-11
ENSG00000205221	VIT	-2.68366	8.75013e-13	1.87866e-11
ENSG00000171310	CHST11	1.19867	9.73582e-13	2.08273e-11
ENSG00000128274	A4GALT	-1.19819	1.00734e-12	2.14911e-11
ENSG00000279047	LOC101926905	-1.37533	1.14319e-12	2.41931e-11
ENSG00000248810	LINC02432	2.58017	1.35012e-12	2.82688e-11
ENSG00000148346	LCN2	2.00491	1.6101e-12	3.33289e-11
ENSG00000228544	CCDC183-AS1	-1.47067	1.61379e-12	3.33761e-11
ENSG00000158296	SLC13A3	1.19271	1.6224e-12	3.35249e-11
ENSG00000237361	TUSC8	1.26175	2.07425e-12	4.25645e-11
ENSG00000134138	MEIS2	-1.10906	2.16921e-12	4.43976e-11
ENSG00000272870	SAP30-DT	-2.07689	2.18035e-12	4.45485e-11
ENSG00000178919	FOXE1	1.4439	2.24735e-12	4.57987e-11
ENSG00000175600	SUGCT	1.69977	2.28039e-12	4.6432e-11
ENSG00000233695	GAS6-AS1	1.06377	2.38983e-12	4.84935e-11
ENSG00000250303	LINC02762	1.56621	3.18705e-12	6.38946e-11
ENSG00000179023	KLHDC7A	1.01077	3.21359e-12	6.43262e-11
ENSG00000043039	BARX2	-1.40763	3.783e-12	7.49002e-11
ENSG00000197421	GGT3P	1.59115	4.2113e-12	8.3102e-11
ENSG00000286075	AC009412.1	23.9446	4.27355e-12	8.41899e-11
ENSG00000213213	CCDC183	-2.9366	4.38287e-12	8.61285e-11
ENSG00000136943	CTSV	-1.37362	4.46496e-12	8.75962e-11
ENSG00000211448	DIO2	-1.09678	4.87943e-12	9.53322e-11
ENSG00000226690	LOC102725191	1.46832	4.96478e-12	9.69197e-11
ENSG00000109107	ALDOC	-1.24513	5.17547e-12	1.007e-10
ENSG00000126950	TMEM35A	-1.3067	5.77117e-12	1.11648e-10
ENSG00000107738	VSIR	1.0014	7.08039e-12	1.35755e-10
ENSG00000184113	CLDN5	-1.93279	8.90656e-12	1.68854e-10
ENSG00000127528	KLF2	1.46848	1.10886e-11	2.07724e-10
ENSG00000082293	COL19A1	-2.30885	1.30021e-11	2.41278e-10
ENSG00000023839	ABCC2	1.35209	1.34629e-11	2.49438e-10
ENSG00000247095	MIR210HG	-1.37363	1.39043e-11	2.56811e-10
ENSG00000158764	ITLN2	1.42907	1.39796e-11	2.58002e-10
ENSG00000204455	TRIM51BP	2.27147	1.55553e-11	2.853e-10
ENSG00000204531	POU5F1	-1.35334	1.57401e-11	2.88243e-10
ENSG00000205763	RP9P	-1.25432	1.96303e-11	3.56997e-10
ENSG00000102230	PCYT1B	-1.55689	2.0565e-11	3.73135e-10
ENSG00000005379	TSPOAP1	-1.33396	2.22122e-11	4.0087e-10
ENSG00000165548	TMEM63C	2.15362	2.25879e-11	4.0703e-10
ENSG00000121316	PLBD1	-1.15938	2.27595e-11	4.0981e-10
ENSG00000182327	GLTPD2	1.22049	2.78758e-11	4.93669e-10
ENSG00000221986	MYBPHL	1.38921	2.88856e-11	5.10026e-10
ENSG00000228065	LINC01515	-1.37867	2.90395e-11	5.11978e-10
ENSG00000157765	SLC34A2	1.61798	2.96943e-11	5.22355e-10
ENSG00000203685	STUM	-2.80194	3.08346e-11	5.40806e-10
ENSG00000174348	PODN	1.2596	3.15811e-11	5.52212e-10
ENSG00000125355	TMEM255A	-2.1438	3.16017e-11	5.52212e-10
ENSG00000139219	COL2A1	-1.81344	3.97732e-11	6.85884e-10
ENSG00000205413	SAMD9	-1.57983	4.40295e-11	7.50743e-10
ENSG00000044459	CNTLN	-1.11611	4.74914e-11	8.05481e-10
ENSG00000182752	PAPPA	1.16732	4.96257e-11	8.36882e-10
ENSG00000059804	SLC2A3	-2.46146	5.4047e-11	9.03073e-10
ENSG00000101825	MXRA5	-1.39356	5.56878e-11	9.29177e-10
ENSG00000182511	FES	-1.30328	6.2874e-11	1.0432e-09
ENSG00000287248	AC009271.2	-1.3336	6.43698e-11	1.06727e-09
ENSG00000122224	LY9	2.0624	6.53941e-11	1.08273e-09
ENSG00000088881	EBF4	1.10699	6.68995e-11	1.10457e-09
ENSG00000114251	WNT5A	1.04848	6.80415e-11	1.12107e-09
ENSG00000168542	COL3A1	-1.7886	6.95209e-11	1.14386e-09
ENSG00000100154	TTC28	-1.34337	7.13992e-11	1.17231e-09
ENSG00000119698	PPP4R4	-1.11049	7.87841e-11	1.29178e-09
ENSG00000169083	AR	-1.06871	7.99026e-11	1.3083e-09
ENSG00000177096	PHETA2	-1.53129	8.11497e-11	1.3278e-09
ENSG00000263244	RP11_473I19	22.4139	8.90974e-11	1.45182e-09
ENSG00000242779	ZNF702P	1.19938	1.20879e-10	1.94426e-09
ENSG00000279930	LA16C_312E84	-1.49082	1.22504e-10	1.96814e-09
ENSG00000104415	CCN4	-5.93899	1.32496e-10	2.11958e-09
ENSG00000173404	INSM1	-2.34719	1.34758e-10	2.15285e-09
ENSG00000183230	CTNNA3	-3.1691	1.40897e-10	2.24335e-09
ENSG00000117394	SLC2A1	-1.57277	1.41445e-10	2.25056e-09
ENSG00000133475	GGT2/LOC102724197	1.67664	1.41555e-10	2.2508e-09
ENSG00000148942	SLC5A12	-1.82572	1.45858e-10	2.31766e-09
ENSG00000071909	MYO3B	-2.04831	1.5842e-10	2.49715e-09
ENSG00000260193	LINC02846	1.78894	1.61589e-10	2.54371e-09
ENSG00000134323	MYCN	-1.32096	1.62652e-10	2.55534e-09
ENSG00000185633	NDUFA4L2	-3.18186	1.79243e-10	2.80296e-09
ENSG00000167851	CD300A	-3.87821	1.81278e-10	2.83291e-09
ENSG00000174080	CTSF	-1.75721	1.95108e-10	3.03701e-09
ENSG00000061656	SPAG4	-2.60282	2.10344e-10	3.24853e-09
ENSG00000130822	PNCK	-5.01263	2.14433e-10	3.30519e-09
ENSG00000132639	SNAP25	-1.27806	2.25615e-10	3.47077e-09
ENSG00000180532	ZSCAN4	1.94866	2.38371e-10	3.65275e-09
ENSG00000084636	COL16A1	-1.96332	2.59448e-10	3.9578e-09
ENSG00000161958	FGF11	-1.34625	2.66606e-10	4.05652e-09
ENSG00000228314	CYP4F29P	2.39197	2.88264e-10	4.36082e-09
ENSG00000184564	SLITRK6	-1.22084	2.92719e-10	4.42539e-09
ENSG00000161682	FAM171A2	-1.07518	3.01339e-10	4.5412e-09
ENSG00000118785	SPP1	2.33488	3.59955e-10	5.34622e-09
ENSG00000008441	NFIX	-1.92212	4.03886e-10	5.95386e-09
ENSG00000162493	PDPN	-1.02922	4.66562e-10	6.84368e-09
ENSG00000088386	SLC15A1	-1.03127	4.67087e-10	6.84714e-09
ENSG00000189184	PCDH18	-1.76501	4.92535e-10	7.19345e-09
ENSG00000167535	CACNB3	-1.00965	5.26687e-10	7.631e-09
ENSG00000141744	PNMT	1.12952	5.2628e-10	7.631e-09
ENSG00000242575	AC0125013	1.95419	5.35043e-10	7.73312e-09
ENSG00000101210	EEF1A2	1.5872	5.41259e-10	7.80865e-09
ENSG00000109265	CRACD	-1.22257	5.83957e-10	8.36345e-09
ENSG00000079931	MOXD1	-1.75694	5.9033e-10	8.44451e-09
ENSG00000047662	FAM184B	-1.30379	6.22165e-10	8.85507e-09
ENSG00000184785	SMIM10	-1.07011	7.58752e-10	1.06555e-08
ENSG00000274002	RP11_66N246	1.5514	7.7985e-10	1.09308e-08
ENSG00000261409	RP6_24A237	2.06678	8.38198e-10	1.16726e-08
ENSG00000183486	MX2	1.15927	8.44356e-10	1.17376e-08
ENSG00000232354	VIPR1-AS1	1.0509	8.52402e-10	1.18356e-08
ENSG00000159403	C1R	-1.0744	9.41397e-10	1.29723e-08
ENSG00000168843	FSTL5	-2.37934	9.87508e-10	1.35368e-08
ENSG00000163823	CCR1	1.33422	1.05943e-09	1.44706e-08
ENSG00000137975	CLCA2	1.79013	1.12319e-09	1.52728e-08
ENSG00000165125	TRPV6	1.88049	1.1751e-09	1.5942e-08
ENSG00000196139	AKR1C3	1.24949	1.48181e-09	1.9875e-08
ENSG00000280043	RP11_1281K218	2.40109	1.49522e-09	2.00436e-08
ENSG00000134333	LDHA	-1.64547	1.50813e-09	2.01938e-08
ENSG00000138587	MNS1	-1.08452	1.51244e-09	2.02286e-08
ENSG00000269226	RP11-722G7.1	-1.41619	1.51702e-09	2.02783e-08
ENSG00000115232	ITGA4	-1.05959	1.53518e-09	2.05095e-08
ENSG00000151882	CCL28	-2.46736	1.63278e-09	2.16788e-08
ENSG00000175322	ZNF519	-1.19015	1.64262e-09	2.17971e-08
ENSG00000184497	TMEM255B	1.43581	2.03842e-09	2.67641e-08
ENSG00000243135	UGT1A3	2.93564	2.08702e-09	2.73871e-08
ENSG00000177173	NAP1L4P1	1.44982	2.17571e-09	2.84719e-08
ENSG00000145244	CORIN	-2.89094	2.21651e-09	2.89578e-08
ENSG00000087303	NID2	-1.08816	2.25253e-09	2.93312e-08
ENSG00000022556	NLRP2	-3.5373	2.42641e-09	3.14914e-08
ENSG00000250266	LINC01612	1.42923	2.61334e-09	3.38063e-08
ENSG00000230710	LINC00332	2.56672	2.92749e-09	3.76438e-08
ENSG00000130821	SLC6A8	-2.03758	3.00662e-09	3.85147e-08
ENSG00000204682	MIR1915HG	-1.10026	3.05596e-09	3.91043e-08
ENSG00000124875	CXCL6	-1.06771	3.2667e-09	4.15732e-08
ENSG00000281969	XXyac-YR38GF2.1	2.26542	3.26822e-09	4.15732e-08
ENSG00000244242	IFITM10	-1.54478	3.28475e-09	4.1761e-08
ENSG00000237886	NALT1	1.35627	3.60913e-09	4.56642e-08
ENSG00000109743	BST1	-3.11972	3.74913e-09	4.72586e-08
ENSG00000160255	ITGB2	2.07468	4.0762e-09	5.1055e-08
ENSG00000112715	VEGFA	-1.23973	4.18591e-09	5.23183e-08
ENSG00000167371	PRRT2	-1.24967	4.49526e-09	5.58016e-08
ENSG00000158966	CACHD1	-1.56773	4.50686e-09	5.58869e-08
ENSG00000197632	SERPINB2	-2.07862	4.61827e-09	5.71786e-08
ENSG00000259495	RP11_210M152	-2.2391	4.65856e-09	5.76472e-08
ENSG00000284395	PERCC1	-1.68014	5.27863e-09	6.48792e-08
ENSG00000236780	LINC01829	1.20797	5.38288e-09	6.60918e-08
ENSG00000185386	MAPK11	1.23512	5.39126e-09	6.61604e-08
ENSG00000178662	CSRNP3	-2.0598	5.73061e-09	7.00342e-08
ENSG00000235033	DAAM2-AS1	1.9013	5.99036e-09	7.30217e-08
ENSG00000139910	NOVA1	-1.25172	5.9905e-09	7.30217e-08
ENSG00000273259	RP11-986E7.7	1.27683	6.0223e-09	7.33716e-08
ENSG00000287838	LOC101927042	1.64965	6.03328e-09	7.34676e-08
ENSG00000228221	LINC00578	1.13532	6.37938e-09	7.74428e-08
ENSG00000197594	ENPP1	-1.32993	6.5283e-09	7.91288e-08
ENSG00000237836	PHKA2-AS1	1.15852	6.69934e-09	8.09532e-08
ENSG00000279662	RP11_609N144	1.17799	6.89857e-09	8.33181e-08
ENSG00000198488	B3GNT6	-3.01777	6.92193e-09	8.34299e-08
ENSG00000171243	SOSTDC1	-1.03384	7.14023e-09	8.60173e-08
ENSG00000187325	TAF9B	-1.14234	7.22683e-09	8.68394e-08
ENSG00000288258	BX470111.1	-7.17489	8.40487e-09	1.00535e-07
ENSG00000046889	PREX2	-1.62172	8.48028e-09	1.01386e-07
ENSG00000144227	NXPH2	-3.78992	9.13583e-09	1.0862e-07
ENSG00000162618	ADGRL4	-2.01335	9.2465e-09	1.09881e-07
ENSG00000158164	TMSB15A	-1.7765	9.36755e-09	1.1104e-07
ENSG00000188130	MAPK12	1.02242	1.03129e-08	1.21515e-07
ENSG00000148600	CDHR1	-1.6346	1.11132e-08	1.30297e-07
ENSG00000268104	SLC6A14	-1.03889	1.12132e-08	1.31208e-07
ENSG00000158406	H4C8	1.18619	1.1951e-08	1.39047e-07
ENSG00000109193	SULT1E1	1.0894	1.27606e-08	1.47853e-07
ENSG00000143595	AQP10	-1.19539	1.28681e-08	1.48952e-07
ENSG00000011422	PLAUR	-1.04262	1.31776e-08	1.52311e-07
ENSG00000113231	PDE8B	-1.16316	1.36251e-08	1.571e-07
ENSG00000215302	CTD_3092A111	-1.13306	1.38589e-08	1.59641e-07
ENSG00000278967	RP5_849H193	1.48123	1.49422e-08	1.71392e-07
ENSG00000104044	OCA2	1.41777	1.4966e-08	1.71558e-07
ENSG00000133424	LARGE1	-1.39621	1.65347e-08	1.88263e-07
ENSG00000185201	IFITM2	-1.95649	1.6804e-08	1.91053e-07
ENSG00000185885	IFITM1	-1.56766	1.71408e-08	1.94323e-07
ENSG00000237440	ZNF737	-1.02602	1.74465e-08	1.9741e-07
ENSG00000198077	CYP2A6 (includes others)	2.51276	1.93132e-08	2.16462e-07
ENSG00000167191	GPRC5B	-1.14816	1.95033e-08	2.18488e-07
ENSG00000233124	LINC00456	1.50867	2.0127e-08	2.24943e-07
ENSG00000183145	RIPPLY3	-2.37312	2.0178e-08	2.25407e-07
ENSG00000167779	IGFBP6	1.17145	2.12366e-08	2.36562e-07
ENSG00000132688	NES	-1.07453	2.14553e-08	2.38661e-07
ENSG00000274253	LOC283683	1.50331	2.18206e-08	2.42042e-07
ENSG00000171840	NINJ2	2.39439	2.22022e-08	2.45813e-07
ENSG00000149256	TENM4	-1.91559	2.25771e-08	2.49848e-07
ENSG00000182983	ZNF662	-1.68302	2.26249e-08	2.50143e-07
ENSG00000267327	LOC107985164	-1.35002	2.52432e-08	2.77535e-07
ENSG00000144724	PTPRG	-1.06296	2.56267e-08	2.81228e-07
ENSG00000278932	LOC101930100	2.40327	2.60813e-08	2.8582e-07
ENSG00000225606	AC0052812	-1.32859	2.68282e-08	2.93325e-07
ENSG00000224294	PINCR	6.64416	2.73965e-08	2.98572e-07
ENSG00000161791	FMNL3	-1.25224	2.77986e-08	3.02536e-07
ENSG00000247809	NR2F2-AS1	-1.70145	2.78224e-08	3.02656e-07
ENSG00000223715	LINC01208	1.70908	2.85091e-08	3.09842e-07
ENSG00000165300	SLITRK5	-1.32156	3.0749e-08	3.32809e-07
ENSG00000259702	RP11_236L141	1.56432	3.19588e-08	3.44957e-07
ENSG00000204542	C6orf15	1.8407	3.24003e-08	3.48927e-07
ENSG00000196104	SPOCK3	-1.04631	3.5199e-08	3.77178e-07
ENSG00000003987	MTMR7	-1.00467	3.5265e-08	3.77714e-07
ENSG00000169918	OTUD7A	1.93598	3.63289e-08	3.87705e-07
ENSG00000273802	H2BC8	1.01145	3.91098e-08	4.15323e-07
ENSG00000260400	RP11_119F75	-1.66183	3.96303e-08	4.20284e-07
ENSG00000186314	PRELID2	-1.01405	3.99922e-08	4.23742e-07
ENSG00000269930	RP11_932O99	-1.27376	4.03751e-08	4.27607e-07
ENSG00000180178	FAR2P1	1.11403	4.28407e-08	4.52101e-07
ENSG00000198643	FAM3D	1.03842	4.40031e-08	4.63748e-07
ENSG00000132000	PODNL1	1.29886	4.74427e-08	4.96459e-07
ENSG00000169418	NPR1	2.15487	5.02963e-08	5.23542e-07
ENSG00000106571	GLI3	-1.11137	5.48126e-08	5.6607e-07
ENSG00000225431	LINC01671	-2.2539	5.78526e-08	5.94868e-07
ENSG00000286329	AC108690.1	-1.0237	5.82098e-08	5.98281e-07
ENSG00000197301	HMGA2-AS1	1.24655	6.64668e-08	6.79604e-07
ENSG00000120937	NPPB	-1.56544	7.06982e-08	7.19759e-07
ENSG00000275688	CCL15-CCL14	2.2305	7.09245e-08	7.21752e-07
ENSG00000165025	SYK	-1.1412	7.14603e-08	7.26268e-07
ENSG00000257219	LNCOG	1.45337	7.33715e-08	7.44094e-07
ENSG00000100473	COCH	-1.04126	7.52351e-08	7.61361e-07
ENSG00000170390	DCLK2	-1.38973	7.54328e-08	7.62709e-07
ENSG00000182916	TCEAL7	1.21435	7.5666e-08	7.64741e-07
ENSG00000250337	PURPL	1.16035	7.87543e-08	7.94596e-07
ENSG00000166741	NNMT	2.37871	7.92793e-08	7.99211e-07
ENSG00000136867	SLC31A2	1.0398	7.94559e-08	8.00309e-07
ENSG00000036448	MYOM2	1.42936	8.01419e-08	8.05201e-07
ENSG00000184194	GPR173	-2.06185	8.05353e-08	8.08771e-07
ENSG00000144837	PLA1A	1.42186	8.41044e-08	8.4354e-07
ENSG00000118432	CNR1	-2.46046	8.4672e-08	8.48154e-07
ENSG00000176697	BDNF	1.11693	8.7942e-08	8.79048e-07
ENSG00000267041	ZNF850	-1.20524	8.8624e-08	8.85118e-07
ENSG00000172985	SH3RF3	-1.82911	9.54407e-08	9.47599e-07
ENSG00000185100	ADSS1	-1.11578	9.5916e-08	9.51918e-07
ENSG00000113396	SLC27A6	-1.01298	1.01001e-07	9.99871e-07
ENSG00000284640	LOC105378644	-1.31376	1.05575e-07	1.04296e-06
ENSG00000134339	SAA2	3.23082	1.32658e-07	1.29484e-06
ENSG00000250320	EDIL3-DT	1.23071	1.44381e-07	1.39945e-06
ENSG00000164430	CGAS	-1.61597	1.51265e-07	1.46377e-06
ENSG00000170011	MYRIP	2.03103	1.5341e-07	1.48332e-06
ENSG00000010379	SLC6A13	1.5663	1.6194e-07	1.55752e-06
ENSG00000163440	PDCL2	2.1975	1.77605e-07	1.69783e-06
ENSG00000110900	TSPAN11	1.51368	1.84344e-07	1.75587e-06
ENSG00000142227	EMP3	-1.08491	1.92022e-07	1.82459e-06
ENSG00000116014	KISS1R	-2.48045	1.921e-07	1.82461e-06
ENSG00000163395	IGFN1	-2.53049	2.30452e-07	2.1654e-06
ENSG00000152208	GRID2	-5.04149	2.38836e-07	2.23266e-06
ENSG00000278828	H3C10	1.06678	2.41449e-07	2.25531e-06
ENSG00000166770	ZNF667-AS1	-2.56871	2.55932e-07	2.37838e-06
ENSG00000257883	RP11_497G191	1.14114	2.66732e-07	2.47001e-06
ENSG00000165959	CLMN	-1.1086	2.75774e-07	2.54876e-06
ENSG00000268061	NAPA-AS1	-1.72451	2.80322e-07	2.58373e-06
ENSG00000177984	LCN15	-3.2055	2.84432e-07	2.61855e-06
ENSG00000241697	TMEFF1	-1.50415	2.99448e-07	2.74397e-06
ENSG00000132854	KANK4	-1.71035	3.0793e-07	2.81951e-06
ENSG00000154122	ANKH	1.00648	3.16682e-07	2.88847e-06
ENSG00000173210	ABLIM3	1.17012	3.21595e-07	2.93102e-06
ENSG00000099284	MACROH2A2	-1.54048	3.31192e-07	3.01385e-06
ENSG00000158856	DMTN	-1.13338	3.44113e-07	3.11824e-06
ENSG00000147246	HTR2C	-3.56763	3.64964e-07	3.29331e-06
ENSG00000079841	RIMS1	-1.38261	3.67677e-07	3.31525e-06
ENSG00000230795	HLA-K	-2.00143	3.76683e-07	3.38872e-06
ENSG00000188060	RAB42	-1.13674	3.76592e-07	3.38872e-06
ENSG00000144891	AGTR1	-1.9508	4.05179e-07	3.62851e-06
ENSG00000165379	LRFN5	-3.10572	4.17278e-07	3.73122e-06
ENSG00000123999	INHA	-2.16156	4.31913e-07	3.85189e-06
ENSG00000187955	COL14A1	-1.28638	4.34327e-07	3.87196e-06
ENSG00000286596	AC098595.1	-1.16846	4.54335e-07	4.03664e-06
ENSG00000261104	RP11_734K215	1.12653	5.43889e-07	4.78736e-06
ENSG00000258819	LINC02289	1.49264	5.60693e-07	4.92427e-06
ENSG00000232618	RP11_439L181	-1.14414	5.74206e-07	5.0243e-06
ENSG00000165028	NIPSNAP3B	-1.11459	5.77254e-07	5.04724e-06
ENSG00000118503	TNFAIP3	-1.21823	5.80357e-07	5.07062e-06
ENSG00000149527	PLCH2	-2.25938	5.86415e-07	5.11977e-06
ENSG00000100027	YPEL1	-1.4398	5.95259e-07	5.18933e-06
ENSG00000267886	ZNF730	-1.01686	6.44562e-07	5.5862e-06
ENSG00000079393	DUSP13	1.83554	6.85219e-07	5.91917e-06
ENSG00000163220	S100A9	2.27168	6.88019e-07	5.94107e-06
ENSG00000197506	SLC28A3	-1.94039	7.11445e-07	6.1277e-06
ENSG00000232000	CLCN3P1	-1.10432	7.17536e-07	6.17117e-06
ENSG00000142149	HUNK	-1.33066	7.32643e-07	6.28511e-06
ENSG00000204179	PTPN20	-3.84919	7.38486e-07	6.33294e-06
ENSG00000240694	PNMA2	1.55618	7.42877e-07	6.36598e-06
ENSG00000274749	KRTAP7-1	1.86077	7.43465e-07	6.36872e-06
ENSG00000231793	DOC2GP	-1.21083	7.67359e-07	6.55204e-06
ENSG00000227630	LINC01132	1.38331	7.85034e-07	6.69813e-06
ENSG00000284057	RP11-606E8.2	2.26988	7.88273e-07	6.72333e-06
ENSG00000083067	TRPM3	-1.56928	8.08465e-07	6.8782e-06
ENSG00000285077	ARHGAP11B	-1.06271	8.10573e-07	6.89118e-06
ENSG00000198963	RORB	1.38845	8.4038e-07	7.12411e-06
ENSG00000287725	AP003071.5	1.11606	9.40238e-07	7.9101e-06
ENSG00000171388	APLN	-1.76557	9.52375e-07	7.99901e-06
ENSG00000137752	CASP1	-1.14536	9.94238e-07	8.30052e-06
ENSG00000188766	SPRED3	1.4071	9.98099e-07	8.32981e-06
ENSG00000086717	PPEF1	2.22328	1.01028e-06	8.41957e-06
ENSG00000234663	LINC01934	1.33355	1.03056e-06	8.56448e-06
ENSG00000198075	SULT1C4	-1.51869	1.08238e-06	8.96677e-06
ENSG00000197261	C6orf141	-1.41217	1.10401e-06	9.12996e-06
ENSG00000156006	NAT2	1.61296	1.15668e-06	9.53559e-06
ENSG00000108231	LGI1	-1.41518	1.18768e-06	9.77409e-06
ENSG00000248474	LINC02122	3.10689	1.25816e-06	1.03111e-05
ENSG00000197584	KCNMB2	-1.57801	1.25918e-06	1.03123e-05
ENSG00000250131	RP11_130F101	-2.10687	1.27794e-06	1.04587e-05
ENSG00000136859	ANGPTL2	-1.47337	1.36258e-06	1.109e-05
ENSG00000187801	ZFP69B	-1.22537	1.37302e-06	1.11635e-05
ENSG00000248874	C5orf17	-1.24944	1.49311e-06	1.2057e-05
ENSG00000236601	RP4_669L172	6.06142	1.52489e-06	1.22926e-05
ENSG00000261997	RP11_212I214	-1.63601	1.55131e-06	1.24886e-05
ENSG00000277561	GOLGA8IP	-1.76599	1.56818e-06	1.25987e-05
ENSG00000136866	ZFP37	-1.08008	1.61515e-06	1.29409e-05
ENSG00000161544	CYGB	1.49356	1.67524e-06	1.3368e-05
ENSG00000251429	RP11_597D137	1.62887	1.68576e-06	1.34429e-05
ENSG00000270571	RP11_355F161	1.21989	1.7004e-06	1.35505e-05
ENSG00000180616	SSTR2	1.1731	1.72449e-06	1.37102e-05
ENSG00000118971	CCND2	1.12102	1.78928e-06	1.41967e-05
ENSG00000112246	SIM1	-1.81113	1.85185e-06	1.46587e-05
ENSG00000082684	SEMA5B	-2.86437	1.89676e-06	1.49641e-05
ENSG00000163207	IVL	4.78284	1.96359e-06	1.54553e-05
ENSG00000162040	HS3ST6	-1.92143	1.97967e-06	1.55715e-05
ENSG00000171126	KCNG3	-2.99178	2.03091e-06	1.59321e-05
ENSG00000174498	IGDCC3	-1.19303	2.10076e-06	1.64256e-05
ENSG00000267284	RP11_397A161	-1.29629	2.1099e-06	1.64862e-05
ENSG00000091972	CD200	-1.52614	2.15738e-06	1.68183e-05
ENSG00000183148	ANKRD20A2P (includes others)	2.13145	2.18708e-06	1.7033e-05
ENSG00000183036	PCP4	-1.8521	2.23493e-06	1.73828e-05
ENSG00000114378	HYAL1	1.05369	2.25351e-06	1.75216e-05
ENSG00000114541	FRMD4B	-1.05983	2.36818e-06	1.83348e-05
ENSG00000132693	CRP	2.52968	2.38903e-06	1.8472e-05
ENSG00000144810	COL8A1	1.11328	2.43902e-06	1.88278e-05
ENSG00000168077	SCARA3	-1.00399	2.4544e-06	1.89342e-05
ENSG00000122176	FMOD	1.27103	2.51042e-06	1.93348e-05
ENSG00000283709	FAM238C	-2.02342	2.51601e-06	1.93716e-05
ENSG00000205667	ARSH	-2.25545	2.60007e-06	2.00057e-05
ENSG00000091704	CPA1	-1.57589	2.67404e-06	2.05191e-05
ENSG00000259129	LINC00648	-1.38139	2.71676e-06	2.08089e-05
ENSG00000204993	AC1397122	1.62502	2.73874e-06	2.09636e-05
ENSG00000256463	SALL3	-2.31795	2.80964e-06	2.14647e-05
ENSG00000149972	CNTN5	-1.8184	2.91906e-06	2.2186e-05
ENSG00000285601	AC084262.2	1.1021	2.93751e-06	2.23191e-05
ENSG00000217330	SSXP10	1.59832	3.00427e-06	2.27824e-05
ENSG00000183960	KCNH8	-1.4461	3.04444e-06	2.30649e-05
ENSG00000186777	ZNF732	-1.27538	3.16488e-06	2.39313e-05
ENSG00000267199	RP11_861E212	-1.70289	3.19495e-06	2.41356e-05
ENSG00000118777	ABCG2	2.5164	3.41234e-06	2.56549e-05
ENSG00000066405	CLDN18	-1.983	3.41827e-06	2.56831e-05
ENSG00000129167	TPH1	-1.29507	3.49274e-06	2.62094e-05
ENSG00000138311	ZNF365	-1.13404	3.75236e-06	2.80154e-05
ENSG00000176659	C20orf197	1.19818	3.83056e-06	2.85363e-05
ENSG00000230628	RP4_781K56	1.9606	3.92892e-06	2.91863e-05
ENSG00000007237	GAS7	1.14564	4.05857e-06	3.00927e-05
ENSG00000162981	LRATD1	1.55522	4.29746e-06	3.17247e-05
ENSG00000237609	AF06485810	-2.80679	4.32796e-06	3.192e-05
ENSG00000241388	HNF1A-AS1	-1.06481	4.41617e-06	3.25402e-05
ENSG00000132855	ANGPTL3	1.30199	4.45195e-06	3.27732e-05
ENSG00000091513	TF	-2.81941	5.40426e-06	3.92223e-05
ENSG00000135643	KCNMB4	-1.14701	5.45485e-06	3.95774e-05
ENSG00000227811	INKA2-AS1	1.22071	5.80177e-06	4.19529e-05
ENSG00000122035	RASL11A	-1.23162	5.93924e-06	4.28422e-05
ENSG00000170324	FRMPD2	1.13454	5.97035e-06	4.30273e-05
ENSG00000213212	NCLP1	-1.90004	6.40569e-06	4.58296e-05
ENSG00000173406	DAB1	-1.7025	6.58103e-06	4.69705e-05
ENSG00000226816	AC00508212	-1.80835	6.67083e-06	4.75111e-05
ENSG00000169583	CLIC3	-1.21092	6.73493e-06	4.79243e-05
ENSG00000250579	CTD-2297D10.2	-1.22379	6.7851e-06	4.82233e-05
ENSG00000168484	SFTPC	1.53139	6.94283e-06	4.92408e-05
ENSG00000205502	C2CD4B	-1.35826	7.08233e-06	5.0106e-05
ENSG00000109956	B3GAT1	1.94885	7.46085e-06	5.25525e-05
ENSG00000280219	RP11_752L203	1.0975	7.82117e-06	5.48455e-05
ENSG00000138606	SHF	-1.05006	8.57392e-06	5.97523e-05
ENSG00000260001	TGFBR3L	1.34036	8.78182e-06	6.11111e-05
ENSG00000265107	GJA5	2.00636	8.84223e-06	6.14773e-05
ENSG00000220908	LINC02531	-5.43395	9.30017e-06	6.43963e-05
ENSG00000272620	AFAP1-AS1	-1.99223	9.34156e-06	6.46261e-05
ENSG00000181126	HLA-V	-2.23875	9.37815e-06	6.48224e-05
ENSG00000183625	CCR3	1.72517	9.62806e-06	6.63946e-05
ENSG00000260641	RP11_1299A163	-1.76085	9.74433e-06	6.71573e-05
ENSG00000111339	ART4	1.43351	9.987e-06	6.86497e-05
ENSG00000115919	KYNU	1.69975	1.01376e-05	6.95638e-05
ENSG00000189409	MMP23B	-1.17716	1.03238e-05	7.07186e-05
ENSG00000164403	SHROOM1	-1.01752	1.06378e-05	7.25125e-05
ENSG00000187908	DMBT1	1.54719	1.07228e-05	7.30497e-05
ENSG00000243709	LEFTY1	1.54315	1.09691e-05	7.45985e-05
ENSG00000204644	ZFP57	1.56365	1.13363e-05	7.69412e-05
ENSG00000154146	NRGN	-1.22288	1.14432e-05	7.75996e-05
ENSG00000075643	MOCOS	-1.0395	1.17913e-05	7.96865e-05
ENSG00000174607	UGT8	-1.53705	1.22488e-05	8.25662e-05
ENSG00000166402	TUB	1.16717	1.23461e-05	8.31507e-05
ENSG00000229970	LOC100505938	-2.16948	1.24189e-05	8.35063e-05
ENSG00000198930	CSAG1	4.14816	1.25725e-05	8.4435e-05
ENSG00000105388	CEACAM5	-1.50999	1.37036e-05	9.15377e-05
ENSG00000121933	TMIGD3	2.07163	1.49769e-05	9.9314e-05
ENSG00000198846	TOX	-1.03652	1.59831e-05	0.000105454
ENSG00000145808	ADAMTS19	-1.39307	1.62916e-05	0.000107191
ENSG00000174912	METTL15P1	1.61567	1.67276e-05	0.000109937
ENSG00000255298	OR8G5	3.1352	1.71277e-05	0.000112224
ENSG00000283234	RP11-26H16.4	3.10323	1.72356e-05	0.000112869
ENSG00000285973	AC063960.2	1.14304	1.88281e-05	0.000122957
ENSG00000272695	GAS6-DT	1.84272	1.97946e-05	0.000128735
ENSG00000229656	ITGB1-DT	1.96152	2.03243e-05	0.000131854
ENSG00000279718	SNX18P12	3.12437	2.06236e-05	0.000133613
ENSG00000247516	MIR4458HG	1.34054	2.06359e-05	0.000133656
ENSG00000196867	ZFP28	-2.86723	2.09952e-05	0.000135686
ENSG00000189134	NKAPL	-1.77009	2.17308e-05	0.00014025
ENSG00000197408	CYP2B6	1.20935	2.19702e-05	0.000141639
ENSG00000226088	HHLA3-AS1	2.85925	2.20132e-05	0.000141864
ENSG00000261739	GOLGA8S	-1.9236	2.25871e-05	0.00014526
ENSG00000178342	KCNG2	1.47206	2.25999e-05	0.000145303
ENSG00000157103	SLC6A1	1.48063	2.36408e-05	0.000151214
ENSG00000183273	CCDC60	1.15877	2.4043e-05	0.000153455
ENSG00000184895	SRY	-1.94262	2.4062e-05	0.000153493
ENSG00000253959	LINC01863	1.41343	2.41012e-05	0.000153702
ENSG00000182050	MGAT4C	-1.97461	2.45119e-05	0.000156069
ENSG00000155962	CLIC2	1.38728	2.46211e-05	0.000156722
ENSG00000275718	CCL15	1.46469	2.48679e-05	0.000158103
ENSG00000260328	RP11_416I21	1.70761	2.58189e-05	0.000163598
ENSG00000240216	CPHL1P	-1.8358	2.61804e-05	0.000165756
ENSG00000138028	CGREF1	1.55735	2.63192e-05	0.000166545
ENSG00000140274	DUOXA2	-2.845	2.64923e-05	0.000167506
ENSG00000286191	AL158195.1	1.70347	2.69796e-05	0.000170405
ENSG00000188677	PARVB	1.27105	2.74422e-05	0.000172912
ENSG00000136274	NACAD	-1.35103	2.77306e-05	0.000174589
ENSG00000248131	LINC01194	-5.45143	2.79662e-05	0.000175885
ENSG00000107159	CA9	-4.15045	2.84256e-05	0.000178585
ENSG00000170577	SIX2	-2.79755	2.93562e-05	0.000183845
ENSG00000131831	RAI2	2.02767	2.93969e-05	0.000184051
ENSG00000261115	TMEM178B	1.84257	2.95775e-05	0.000184937
ENSG00000182492	BGN	1.38726	2.99818e-05	0.000187283
ENSG00000125726	CD70	2.81425	3.01028e-05	0.000187973
ENSG00000137203	TFAP2A	-1.24137	3.0193e-05	0.000188487
ENSG00000273734	LLFOS_48D62	-5.71608	3.10961e-05	0.000193461
ENSG00000267868	RP11_120K243	1.11255	3.12728e-05	0.000194408
ENSG00000123496	IL13RA2	1.2114	3.14553e-05	0.000195388
ENSG00000088340	FER1L4	-2.12047	3.23631e-05	0.000200501
ENSG00000276724	RP11_1000B67	-1.00334	3.28082e-05	0.000203152
ENSG00000146151	HMGCLL1	-1.84422	3.34893e-05	0.000206884
ENSG00000266903	LOC107985305	1.1477	3.35616e-05	0.000207275
ENSG00000213648	SULT1A3/SULT1A4	-1.59339	3.37602e-05	0.000208283
ENSG00000148803	FUOM	-1.18148	3.44515e-05	0.000212271
ENSG00000135362	PRR5L	1.78852	3.5784e-05	0.000219583
ENSG00000183566	BPIFA4P	3.75008	3.59178e-05	0.000220331
ENSG00000137198	GMPR	1.28868	3.72244e-05	0.000227638
ENSG00000197550	RP11_460N112	-2.22782	3.73931e-05	0.000228551
ENSG00000206052	DOK6	-1.43262	3.76539e-05	0.000229967
ENSG00000147655	RSPO2	-5.26608	3.77374e-05	0.000230417
ENSG00000274238	RP11_115D193	1.33949	3.87685e-05	0.000236136
ENSG00000197479	PCDHB11	-1.03555	3.91138e-05	0.000238012
ENSG00000265787	CYP4F35P	1.15409	4.05295e-05	0.000246069
ENSG00000228561	RP11_114M11	2.13826	4.08068e-05	0.000247688
ENSG00000171385	KCND3	1.64212	4.12295e-05	0.00024987
ENSG00000177551	NHLH2	1.12588	4.15566e-05	0.000251594
ENSG00000228707	RP11_787B42	2.8	4.30842e-05	0.000259977
ENSG00000227400	AC0125012	2.44176	4.34514e-05	0.000261859
ENSG00000198417	MT1F	-1.45065	4.58639e-05	0.000275486
ENSG00000132703	APCS	2.24569	4.58884e-05	0.000275563
ENSG00000213760	ATP6V1G2	1.18677	4.74522e-05	0.000284017
ENSG00000175426	PCSK1	-2.29253	4.78367e-05	0.000285884
ENSG00000161638	ITGA5	1.3501	5.03735e-05	0.000299909
ENSG00000053438	NNAT	-2.12375	5.14365e-05	0.000305622
ENSG00000114948	ADAM23	1.96162	5.30225e-05	0.000314228
ENSG00000168350	DEGS2	-1.606	5.33524e-05	0.000315816
ENSG00000224597	SVIL-AS1	-1.89165	5.35351e-05	0.000316739
ENSG00000251322	SHANK3	1.18853	5.79765e-05	0.000340294
ENSG00000095777	MYO3A	-1.64441	5.81905e-05	0.000341296
ENSG00000236882	LINC01554	1.3697	5.90652e-05	0.000346254
ENSG00000101162	TUBB1	-1.69725	6.10302e-05	0.000356449
ENSG00000104755	ADAM2	-2.25909	6.12162e-05	0.000357447
ENSG00000254585	MAGEL2	-3.35588	6.24673e-05	0.000364213
ENSG00000232194	RP1_313L43	3.13519	6.3486e-05	0.000369334
ENSG00000162753	SLC9C2	-1.87281	6.65075e-05	0.000385301
ENSG00000143184	XCL1	-1.07268	6.68361e-05	0.000387014
ENSG00000255327	LINC02697	2.84751	6.72748e-05	0.000389364
ENSG00000235026	DPP10-AS1	-3.9185	6.75633e-05	0.000390938
ENSG00000232316	LINC02518	1.26916	7.08087e-05	0.000407525
ENSG00000163581	SLC2A2	1.77609	7.43241e-05	0.000425892
ENSG00000230423	XX_C2158C61	1.27938	7.43969e-05	0.000426206
ENSG00000221867	MAGEA3/MAGEA6	2.73432	7.49389e-05	0.000428905
ENSG00000130595	TNNT3	-1.63909	7.55663e-05	0.000431964
ENSG00000269097	TPRG1LP1	1.48259	7.59015e-05	0.000433775
ENSG00000148671	ADIRF	-4.75001	7.71768e-05	0.000440638
ENSG00000122859	NEUROG3	-1.85779	7.77139e-05	0.00044349
ENSG00000265933	LINC00668	-2.31387	7.96472e-05	0.000453648
ENSG00000138829	FBN2	-1.41606	8.06351e-05	0.000458833
ENSG00000134028	ADAMDEC1	1.54532	8.27821e-05	0.000469694
ENSG00000057704	TMCC3	-1.09849	8.43514e-05	0.000477339
ENSG00000205611	LOC107985433	1.09954	8.571e-05	0.00048468
ENSG00000268621	IGFL2-AS1	-2.61899	8.88163e-05	0.000501047
ENSG00000179111	HES7	1.65276	9.07145e-05	0.000511147
ENSG00000143320	CRABP2	-1.27843	9.2296e-05	0.000519069
ENSG00000287796	AC016925.3	2.00477	9.48455e-05	0.000531512
ENSG00000158008	EXTL1	1.25935	9.5214e-05	0.000533198
ENSG00000164932	CTHRC1	-1.43601	9.52739e-05	0.000533408
ENSG00000126778	SIX1	-2.03974	9.60718e-05	0.000537493
ENSG00000249413	RP11_25H121	-3.68735	9.73636e-05	0.000543553
ENSG00000166415	WDR72	-1.92737	9.90312e-05	0.000551572
ENSG00000168298	H1-4	1.24167	0.000100628	0.000559939
ENSG00000047932	GOPC	-1.98964	0.000100687	0.000560001
ENSG00000100206	DMC1	-1.12387	0.000101343	0.000563256
ENSG00000166961	MS4A15	1.93984	0.000102826	0.000570021
ENSG00000123561	SERPINA7	1.19582	0.000105602	0.000583637
ENSG00000120833	SOCS2	-1.08962	0.000105892	0.000584962
ENSG00000257501	LOC643711	1.74808	0.000106423	0.000587624
ENSG00000228044	LOC101927787	2.36457	0.000108352	0.000596463
ENSG00000143858	SYT2	-1.21387	0.000108665	0.000597912
ENSG00000132205	EMILIN2	-1.06784	0.000114939	0.000628632
ENSG00000236714	LINC01844	1.26486	0.000117795	0.000642764
ENSG00000285877	AC007448.4	-1.08006	0.000139355	0.00075157
ENSG00000135838	NPL	1.06774	0.000142858	0.000768711
ENSG00000197208	SLC22A4	1.20283	0.000146015	0.000783737
ENSG00000107731	UNC5B	1.13514	0.000148287	0.00079413
ENSG00000253474	RP11_10H31	1.21879	0.000150374	0.000804577
ENSG00000062096	ARSF	-2.22474	0.000153387	0.000819031
ENSG00000133124	IRS4	1.84559	0.000154423	0.000824007
ENSG00000139915	MDGA2	-2.31876	0.000157866	0.000841052
ENSG00000184232	OAF	1.08727	0.0001623	0.000862153
ENSG00000156414	TDRD9	1.27888	0.000168072	0.000888619
ENSG00000117507	FMO6P	1.38591	0.000168941	0.000892023
ENSG00000148948	LRRC4C	-1.56867	0.000171544	0.000904149
ENSG00000136872	ALDOB	1.46523	0.000173475	0.000913922
ENSG00000185666	SYN3	-1.11958	0.00017484	0.000920701
ENSG00000037280	FLT4	-2.05401	0.000179124	0.000940956
ENSG00000131435	PDLIM4	-1.52377	0.00018206	0.000953839
ENSG00000247151	CSTF3-DT	-2.27255	0.000186451	0.00097404
ENSG00000159167	STC1	-2.00707	0.000187068	0.000976833
ENSG00000258377	RP11_649E75	-5.51956	0.00018891	0.000985583
ENSG00000258773	RP11_255M22	3.35941	0.000193691	0.00100808
ENSG00000224939	LINC00184	1.97139	0.000195381	0.00101509
ENSG00000230978	LINC00160	2.03699	0.000195577	0.00101588
ENSG00000251191	LINC00589	1.46417	0.000199798	0.0010369
ENSG00000041515	MYO16	1.05941	0.000203445	0.0010549
ENSG00000173698	ADGRG2	-1.87982	0.000204518	0.00106023
ENSG00000129038	LOXL1	-1.2379	0.000205935	0.00106687
ENSG00000225790	RP11_2L81	1.56209	0.000208371	0.00107761
ENSG00000274373	RP13_714J121	-2.99648	0.000217111	0.00111914
ENSG00000159263	SIM2	-2.60135	0.000227525	0.001169
ENSG00000254044	RP11_681L81	-1.54712	0.000228627	0.00117415
ENSG00000119457	SLC46A2	1.29185	0.000236001	0.0012073
ENSG00000287592	AC073348.2	-2.1963	0.000236781	0.00121077
ENSG00000204397	CARD16	1.58036	0.000237939	0.00121617
ENSG00000115616	SLC9A2	1.17213	0.000241178	0.00123166
ENSG00000286796	LOC105374570	1.32653	0.00024586	0.00125395
ENSG00000267383	CTC_260E66	-1.03222	0.000248558	0.00126634
ENSG00000171136	RLN3	1.19777	0.000252561	0.00128424
ENSG00000272679	RP11_216L1318	-3.12574	0.000263131	0.00133312
ENSG00000136244	IL6	-2.49938	0.000271107	0.00136913
ENSG00000286868	AC074290.2	-1.68007	0.000272589	0.00137515
ENSG00000136944	LMX1B	-1.76207	0.000273757	0.00137986
ENSG00000260693	AC0261508	-1.32621	0.000274021	0.00138061
ENSG00000224746	AC0159871	1.67402	0.0002754	0.00138654
ENSG00000225489	RP11_390F43	-1.26965	0.000283774	0.00142338
ENSG00000012779	ALOX5	1.95671	0.000294495	0.00146968
ENSG00000261279	ULK4P1	-3.03025	0.000294861	0.00147119
ENSG00000285417	BX571818.1	-1.3327	0.000307262	0.0015292
ENSG00000124701	APOBEC2	1.67626	0.000308018	0.001532
ENSG00000253666	KB_1615E42	1.96144	0.00031565	0.00156469
ENSG00000230537	LOC100507103	-1.8215	0.000319928	0.00158345
ENSG00000225329	LHFPL3-AS2	-1.09168	0.000323508	0.00159996
ENSG00000288107	AL731769.2	-1.07876	0.000324604	0.00160404
ENSG00000227619	RP11_492E32	1.13241	0.000326592	0.00161285
ENSG00000134256	CD101	-1.17782	0.000329528	0.00162497
ENSG00000267279	RP11_879F142	1.03617	0.000334426	0.0016457
ENSG00000122133	PAEP	2.65933	0.000334795	0.00164683
ENSG00000183090	FREM3	-2.97712	0.00034184	0.00167695
ENSG00000063438	AHRR	2.55123	0.000350316	0.00171427
ENSG00000241635	UGT1A1	1.32835	0.000355884	0.00173792
ENSG00000187017	ESPN	-1.78218	0.000358902	0.00175194
ENSG00000198251	CTC_490E2113	2.59725	0.000359054	0.00175232
ENSG00000237499	WAKMAR2	-1.01992	0.000367145	0.00178701
ENSG00000011465	DCN	1.42091	0.000368274	0.00179177
ENSG00000257474	RP11_359M61	2.26545	0.000372249	0.00180924
ENSG00000146674	IGFBP3	-2.11054	0.000374811	0.00182058
ENSG00000060558	GNA15	-1.26345	0.000377308	0.00183233
ENSG00000138135	CH25H	1.01561	0.000389562	0.00188218
ENSG00000130635	COL5A1	-1.30278	0.00039057	0.00188628
ENSG00000269353	AC0920711	2.06159	0.000390655	0.0018863
ENSG00000284713	SMIM38	1.22375	0.000391792	0.00188881
ENSG00000162595	DIRAS3	-1.50562	0.000399785	0.00192293
ENSG00000173702	MUC13	1.26365	0.000407161	0.00195644
ENSG00000282988	H3C4	1.01652	0.000412214	0.00197829
ENSG00000166173	LARP6	-1.36556	0.000421754	0.00201916
ENSG00000169856	ONECUT1	-1.7091	0.000430227	0.00205515
ENSG00000275465	LOC158434	-2.22489	0.000437477	0.00208515
ENSG00000213401	MAGEA12	3.74102	0.000443367	0.00211153
ENSG00000136931	NR5A1	-3.79177	0.000454854	0.00215971
ENSG00000286546	LOC613266	-2.48799	0.000455346	0.00216161
ENSG00000284874	SEPT5-GP1BB	-1.41425	0.000457227	0.00216924
ENSG00000153292	ADGRF1	1.51093	0.000459002	0.00217635
ENSG00000138795	LEF1	1.53464	0.00045965	0.00217899
ENSG00000175414	ARL10	-1.09868	0.000460786	0.00218393
ENSG00000186469	GNG2	-2.04554	0.000464726	0.00219952
ENSG00000133328	PLAAT2	1.47426	0.000465211	0.00220138
ENSG00000167311	ART5	1.36531	0.000467442	0.00221017
ENSG00000281566	RP11-485F13.1	-1.21899	0.000469824	0.0022201
ENSG00000090539	CHRD	-1.46412	0.000472676	0.00223268
ENSG00000260628	RP11_1166P101	-1.86914	0.000475675	0.00224551
ENSG00000261456	TUBB8	1.72028	0.000486861	0.00229282
ENSG00000227634	LINC01714	1.38636	0.000491112	0.00231064
ENSG00000204851	PNMA8B	-1.30438	0.00049359	0.00232077
ENSG00000269416	LINC01224	-1.54963	0.000500475	0.00234852
ENSG00000229544	NKX1-2	1.65927	0.000504486	0.00236594
ENSG00000111885	MAN1A1	-1.09117	0.000514136	0.00240928
ENSG00000120903	CHRNA2	1.03127	0.000519812	0.00243347
ENSG00000275591	XKR5	-1.29201	0.000522633	0.00244522
ENSG00000117152	RGS4	-1.7895	0.000537994	0.00251212
ENSG00000102678	FGF9	-2.21734	0.000539354	0.00251798
ENSG00000259485	LINC02253	-1.33436	0.000561181	0.00261163
ENSG00000288253	AC010332.3	-2.57699	0.000563899	0.00262377
ENSG00000186474	KLK12	-1.68267	0.000571919	0.00265795
ENSG00000105967	TFEC	1.47925	0.000590714	0.00274045
ENSG00000101213	PTK6	-1.37524	0.000607035	0.00280901
ENSG00000119227	PIGZ	-1.17004	0.000612668	0.0028312
ENSG00000257336	PRELID2P1	1.28789	0.000615059	0.00284113
ENSG00000181577	C6orf223	-1.94428	0.000623859	0.00287505
ENSG00000248144	ADH1C	1.07541	0.000629313	0.00289624
ENSG00000236404	VLDLR-AS1	1.14648	0.000656601	0.00300603
ENSG00000240497	RP11_185E81	2.28376	0.000662809	0.00302976
ENSG00000162511	LAPTM5	2.21446	0.000671879	0.00306663
ENSG00000030304	MUSK	-1.55316	0.00067985	0.00309928
ENSG00000104894	CD37	-1.08749	0.000683274	0.00311429
ENSG00000130675	MNX1	-1.25606	0.00068401	0.00311644
ENSG00000234961	RP11_124N143	-3.16115	0.000701659	0.00319378
ENSG00000106302	HYAL4	2.43815	0.000703828	0.00320304
ENSG00000168398	BDKRB2	-1.11289	0.000707626	0.00321844
ENSG00000041982	TNC	-1.20509	0.000707758	0.00321844
ENSG00000109132	PHOX2B	1.15744	0.000717287	0.00325489
ENSG00000163492	CCDC141	1.11148	0.000736778	0.00333886
ENSG00000226476	LINC01748	-1.06592	0.000766971	0.00346308
ENSG00000105997	HOXA3	-2.20509	0.000769984	0.00347469
ENSG00000173376	NDNF	-1.90075	0.000775243	0.00349643
ENSG00000105143	SLC1A6	-2.03923	0.000779156	0.00351163
ENSG00000260963	LOC105371264	1.51744	0.000781241	0.00351945
ENSG00000240758	RP11_155G146	-1.32933	0.000804611	0.00361289
ENSG00000075043	KCNQ2	3.24838	0.000807015	0.00362177
ENSG00000268262	CTC_246B188	2.12263	0.000808333	0.003627
ENSG00000287037	AC097709.1	-1.48913	0.000813466	0.00364625
ENSG00000142303	ADAMTS10	1.16954	0.000815216	0.00365234
ENSG00000254337	RP11_865I62	1.09264	0.000816054	0.00365333
ENSG00000231902	RP11_29B92	1.37208	0.000846503	0.00377749
ENSG00000260805	RP11_61J195	1.05241	0.000851039	0.00379344
ENSG00000177098	SCN4B	1.45832	0.000876618	0.00389718
ENSG00000196660	SLC30A10	-1.06351	0.000888768	0.00394304
ENSG00000179954	SSC5D	-1.00421	0.000905168	0.00400753
ENSG00000121410	A1BG	1.56598	0.000947341	0.00417204
ENSG00000267078	RP11_666A89	-1.25287	0.000947438	0.00417204
ENSG00000131152	RP11_178L84	2.70366	0.000954363	0.00419863
ENSG00000140505	CYP1A2	1.30435	0.000962489	0.00423281
ENSG00000162631	NTNG1	-1.74275	0.000966826	0.0042503
ENSG00000139344	AMDHD1	2.08416	0.000971837	0.00426915
ENSG00000147166	ITGB1BP2	-1.09232	0.000975314	0.00428022
ENSG00000129467	ADCY4	1.08153	0.000998084	0.00436985
ENSG00000232977	LINC00327	-1.64241	0.00099903	0.00437318
ENSG00000255745	RP11_625L161	-1.31197	0.00101003	0.00441805
ENSG00000150361	KLHL1	-3.72982	0.00101988	0.00445456
ENSG00000182575	NXPH3	-2.018	0.0010398	0.00452567
ENSG00000260886	TAT-AS1	1.10386	0.00105819	0.00459559
ENSG00000224897	POT1-AS1	-1.03832	0.0010731	0.00464926
ENSG00000205212	CCDC144NL	-1.43866	0.00108349	0.00468999
ENSG00000166473	PKD1L2	1.24271	0.00110144	0.0047581
ENSG00000272540	XXBAC_BPG252P99	-1.00836	0.00110558	0.00477338
ENSG00000234155	LINC02535	1.31446	0.00114289	0.00491738
ENSG00000203878	CHIAP2	1.51042	0.00115175	0.00495283
ENSG00000116039	ATP6V1B1	-1.65842	0.00118913	0.00509319
ENSG00000134569	LRP4	-1.05186	0.00119628	0.0051201
ENSG00000117407	ARTN	-1.10137	0.0012132	0.00518315
ENSG00000188676	IDO2	1.51021	0.00123215	0.00525653
ENSG00000054179	ENTPD2	-1.16481	0.00123735	0.00527489
ENSG00000184588	PDE4B	-2.29575	0.00126333	0.00537596
ENSG00000223839	FAM95B1	1.23159	0.00127943	0.00543568
ENSG00000151364	KCTD14	-1.10812	0.00128772	0.00546698
ENSG00000177202	SPACA4	-1.63629	0.00129371	0.00549044
ENSG00000183186	C2CD4C	-2.52693	0.00130665	0.00553742
ENSG00000255624	C10orf88B	-1.92472	0.00131288	0.00555685
ENSG00000148965	SAA4	4.167	0.00132475	0.00560408
ENSG00000262152	LINC00514	-1.49961	0.00133608	0.00564899
ENSG00000281097	LINC01395	2.22048	0.00134867	0.0056971
ENSG00000206341	HLA-H	-1.02209	0.00135065	0.00570445
ENSG00000142611	PRDM16	-1.41916	0.00135153	0.00570716
ENSG00000124721	DNAH8	-1.75926	0.00135265	0.00570985
ENSG00000268460	LOC93429	-2.20075	0.00140194	0.00590315
ENSG00000123612	ACVR1C	-1.5754	0.00141414	0.00595031
ENSG00000140835	CHST4	1.11301	0.00141518	0.00595256
ENSG00000078295	ADCY2	-3.04802	0.00141881	0.00596676
ENSG00000179059	ZFP42	-1.34969	0.00143299	0.00602184
ENSG00000100604	CHGA	-1.89286	0.00146323	0.00613393
ENSG00000229047	AF12757710	4.08314	0.00155045	0.0064618
ENSG00000159753	CARMIL2	1.87504	0.00156984	0.00652537
ENSG00000174945	AMZ1	1.76999	0.00157869	0.00655642
ENSG00000121552	CSTA	1.025	0.00163664	0.00677568
ENSG00000279821	RP11_1334A245	-1.02767	0.00163819	0.00678089
ENSG00000237863	LOC101928358	1.681	0.00165445	0.00684341
ENSG00000272896	RP11_216L1317	-1.44649	0.00166835	0.00689247
ENSG00000168830	HTR1E	-4.23762	0.00168966	0.00697077
ENSG00000154027	AK5	-1.31918	0.00170255	0.00702027
ENSG00000145864	GABRB2	-1.66799	0.0017144	0.00706609
ENSG00000244062	RP11_404G162	-2.51993	0.00174546	0.00717471
ENSG00000227115	LINC01630	-1.83583	0.00175705	0.00721483
ENSG00000261247	GOLGA8T	-1.19724	0.00177113	0.0072676
ENSG00000216921	LOC285095	2.0029	0.00185925	0.00758316
ENSG00000286050	AC012078.2	2.31008	0.00186	0.00758358
ENSG00000137872	SEMA6D	1.32925	0.00187181	0.00762912
ENSG00000106483	SFRP4	3.08774	0.00187326	0.00763174
ENSG00000248710	TRIM59-IFT80	-1.26988	0.0018863	0.00767758
ENSG00000163083	INHBB	-1.01764	0.00191755	0.00778869
ENSG00000186094	AGBL4	-1.43392	0.00192037	0.00779749
ENSG00000033122	LRRC7	-1.04224	0.0019671	0.00795719
ENSG00000186907	RTN4RL2	-2.06255	0.0019712	0.00797241
ENSG00000234147	RP3_460G22	1.85919	0.00198345	0.00801648
ENSG00000213115	AC1041311	-2.44683	0.00200935	0.00811008
ENSG00000143248	RGS5	-1.26659	0.00203855	0.00821673
ENSG00000066032	CTNNA2	-1.19679	0.00213353	0.0085421
ENSG00000078725	BRINP1	1.17664	0.00216206	0.0086424
ENSG00000122367	LDB3	-1.80286	0.00217881	0.00869905
ENSG00000134443	GRP	-2.60309	0.00217987	0.00870181
ENSG00000137825	ITPKA	-1.06894	0.00221249	0.00881124
ENSG00000085741	WNT11	1.6171	0.00224709	0.00893548
ENSG00000145920	CPLX2	-1.84146	0.0022479	0.00893571
ENSG00000136842	TMOD1	2.02021	0.00227029	0.00901258
ENSG00000228793	LOC100507336	1.09959	0.00227358	0.0090212
ENSG00000184860	SDR42E1	-2.31906	0.00227478	0.00902437
ENSG00000212232	SNORD17	1.56529	0.00227566	0.00902634
ENSG00000262155	LINC02175	-1.04003	0.0023155	0.00916438
ENSG00000237686	LOC101929705	-2.33299	0.00241346	0.00951707
ENSG00000176998	HCG4	-2.00476	0.00247769	0.00974113
ENSG00000160593	JAML	1.49499	0.00248161	0.00975167
ENSG00000249574	LOC442497	-1.67446	0.00248636	0.00976872
ENSG00000185974	GRK1	-2.86959	0.00249887	0.0098146
ENSG00000229203	AC1035647	-1.64407	0.00255869	0.0100296
ENSG00000120328	PCDHB12	-1.58459	0.00260947	0.0102117
ENSG00000147869	CER1	-1.96907	0.0026243	0.0102664
ENSG00000169885	CALML6	1.20007	0.00265488	0.0103688
ENSG00000238142	LOC105376805	-1.25259	0.00271773	0.0105742
ENSG00000269242	CTD_2192J1622	1.43716	0.0027231	0.0105898
ENSG00000243550	LINC01214	1.73072	0.00273046	0.0106135
ENSG00000166670	MMP10	-1.6352	0.00274954	0.0106821
ENSG00000137285	TUBB2B	-1.08476	0.00276363	0.0107334
ENSG00000100249	C22orf31	-1.68071	0.00281048	0.0108778
ENSG00000236230	RP11_400N131	-1.13838	0.00286336	0.0110553
ENSG00000151025	GPR158	-1.49785	0.00286543	0.0110615
ENSG00000096006	CRISP3	-1.20684	0.00288364	0.0111175
ENSG00000237009	GLIS3-AS1	2.07874	0.00288368	0.0111175
ENSG00000225117	ARSDP1	3.11797	0.00288997	0.0111363
ENSG00000231689	LINC01090	-2.08281	0.00288976	0.0111363
ENSG00000184408	KCND2	1.88359	0.00294926	0.0113315
ENSG00000181072	CHRM2	2.33005	0.00295025	0.0113335
ENSG00000285847	AL713852.1	-1.18055	0.00303592	0.0116229
ENSG00000287944	AC027584.1	-2.05976	0.00306209	0.0117099
ENSG00000197332	CTC-499B15.5	-1.07443	0.0030634	0.011713
ENSG00000137571	SLCO5A1	-1.1286	0.00307939	0.0117642
ENSG00000237487	VN1R48P	1.2862	0.00307977	0.0117642
ENSG00000236740	LOC101927189	-3.23197	0.0031583	0.0120215
ENSG00000174137	FAM53A	-1.11804	0.0031796	0.0120967
ENSG00000125285	SOX21	-2.25342	0.00322786	0.0122625
ENSG00000158874	APOA2	1.56792	0.00323352	0.0122801
ENSG00000258725	PRC1-AS1	-1.00687	0.00331908	0.0125808
ENSG00000278341	RP5_1142A610	1.5944	0.00337215	0.0127615
ENSG00000269976	RP11_130L82	2.34226	0.00337724	0.0127767
ENSG00000132872	SYT4	-1.52662	0.00338511	0.0128024
ENSG00000162039	MEIOB	-1.90514	0.00338912	0.0128135
ENSG00000146205	ANO7	-1.36941	0.00340455	0.0128656
ENSG00000125084	WNT1	1.89399	0.00340808	0.0128769
ENSG00000102043	MTMR8	-1.05183	0.0034901	0.0131406
ENSG00000250546	LOC101928978	-1.68725	0.00349488	0.0131524
ENSG00000245526	LINC00461	-1.55991	0.00355532	0.0133586
ENSG00000277232	GTSE1-DT	1.84615	0.00361807	0.0135644
ENSG00000244025	KRTAP19-3	1.89735	0.00367521	0.0137566
ENSG00000151164	RAD9B	-1.26792	0.00375354	0.0140143
ENSG00000253339	RP11_434I123	1.44475	0.00385301	0.0143405
ENSG00000108849	PPY	-1.73955	0.00387228	0.0144022
ENSG00000272884	RP11_104H1510	-1.67856	0.00387287	0.0144022
ENSG00000255073	ZFP91-CNTF	-3.32596	0.00394317	0.0146231
ENSG00000267709	LOC101928844	-2.65071	0.00396474	0.0146939
ENSG00000227695	DNMBP-AS1	2.0563	0.00398941	0.0147714
ENSG00000212939	RP1_29C1810	-2.02156	0.00401564	0.01485
ENSG00000235123	DSCAM-AS1	-1.00125	0.004027	0.0148873
ENSG00000251141	MRPS30-DT	-2.0413	0.00411628	0.0151676
ENSG00000137273	FOXF2	-3.39337	0.00413235	0.0152221
ENSG00000279369	RP11_51F161	-1.73303	0.00414405	0.0152628
ENSG00000206120	EGFEM1P	-1.55251	0.00414684	0.0152707
ENSG00000238005	LOC101927851	1.06231	0.00423844	0.0155668
ENSG00000019102	VSIG2	-1.58999	0.00430008	0.0157649
ENSG00000235899	LINC01564	1.95707	0.00431542	0.0158152
ENSG00000175497	DPP10	-1.97904	0.00432365	0.0158355
ENSG00000276077	LOC389831 (includes others)	-8.91996	0.00434862	0.0159221
ENSG00000184058	TBX1	-2.81079	0.00449341	0.0163939
ENSG00000272189	RP3_325F225	1.13565	0.00449973	0.0164144
ENSG00000141526	SLC16A3	-1.00768	0.00462933	0.0168507
ENSG00000258932	LOC728755	-2.67406	0.0047517	0.0172326
ENSG00000198948	MFAP3L	1.58112	0.00475112	0.0172326
ENSG00000232400	RAD17P1	-1.27039	0.00477539	0.0173105
ENSG00000124493	GRM4	-1.2802	0.00478686	0.0173468
ENSG00000254343	RP11_760H222	1.1219	0.00479561	0.0173705
ENSG00000237978	KCNMB2-AS1	-1.07648	0.00479841	0.0173753
ENSG00000186910	SERPINA11	-1.46295	0.00485377	0.0175543
ENSG00000171804	WDR87	-2.80006	0.00486989	0.0176045
ENSG00000131398	KCNC3	-1.52338	0.00499537	0.0179949
ENSG00000162669	HFM1	-1.21615	0.00499784	0.0180011
ENSG00000241634	RP11_381E241	-1.32628	0.00501267	0.0180352
ENSG00000100505	TRIM9	-1.02593	0.0051335	0.0184251
ENSG00000232938	RPL23AP87	1.48005	0.00519764	0.0186271
ENSG00000172215	CXCR6	1.33231	0.0052888	0.0189109
ENSG00000181355	OFCC1	-3.90463	0.00533742	0.0190559
ENSG00000260634	RP11_521O161	1.02243	0.00541008	0.0192937
ENSG00000101670	LIPG	-1.04471	0.005454	0.0194223
ENSG00000271474	LOC105377335	-1.39025	0.00547775	0.019501
ENSG00000131015	ULBP2	1.03567	0.00553966	0.0196977
ENSG00000153233	PTPRR	-2.80526	0.00560435	0.0198918
ENSG00000250685	LOC654780	-1.29483	0.00565134	0.0200436
ENSG00000258815	LINC02820	-1.28536	0.00567605	0.0201252
ENSG00000236673	RP11_69I82	1.82428	0.00572134	0.0202706
ENSG00000225057	AC0965744	-2.19908	0.00572682	0.0202809
ENSG00000259660	DNM1P47	-1.21813	0.00582351	0.0205838
ENSG00000112139	MDGA1	-2.41687	0.00583149	0.0206053
ENSG00000225205	AC0938181	-1.4841	0.00585108	0.0206622
ENSG00000130045	NXNL2	1.06651	0.00585437	0.0206707
ENSG00000219607	PPP1R3G	-1.24851	0.00592312	0.0208885
ENSG00000134013	LOXL2	-1.0345	0.00592766	0.0208983
ENSG00000251600	LOC101927636	-1.0274	0.00598473	0.0210775
ENSG00000277991	CH507_338C241	-1.26565	0.00610138	0.0214309
ENSG00000237452	BHMG1	2.73102	0.00618785	0.0216864
ENSG00000229807	XIST	-1.35466	0.00620889	0.0217504
ENSG00000150175	FRMPD2B	1.60635	0.00624393	0.0218637
ENSG00000101306	MYLK2	-2.59072	0.00632915	0.0221324
ENSG00000260552	LOC101927809	-1.41934	0.00641803	0.0224167
ENSG00000147697	GSDMC	-1.48632	0.00649614	0.0226494
ENSG00000166573	GALR1	-2.87749	0.00665552	0.0231607
ENSG00000130643	CALY	-2.51128	0.00670679	0.0233185
ENSG00000285953	AC000120.3	-1.3052	0.00671524	0.0233342
ENSG00000286878	AC100805.1	2.82366	0.00673526	0.0233969
ENSG00000225111	AC0839001	1.39304	0.00680815	0.0236293
ENSG00000251491	OR7E28P	-1.86994	0.00690994	0.0239545
ENSG00000241684	ADAMTS9-AS2	-1.25653	0.00691504	0.0239686
ENSG00000202198	7SK	-3.00596	0.00696608	0.024116
ENSG00000226965	LOC105375451	1.60138	0.00701466	0.0242642
ENSG00000226609	RP11_276E154	1.58483	0.00704404	0.024348
ENSG00000231442	LARP1BP1	1.67157	0.00709346	0.0245045
ENSG00000184937	WT1	-1.92107	0.00711669	0.0245676
ENSG00000164093	PITX2	-1.01658	0.0071462	0.0246471
ENSG00000225581	TRIM53AP/TRIM53CP	2.81296	0.00714581	0.0246471
ENSG00000183347	GBP6	-1.12567	0.00718634	0.0247603
ENSG00000203812	H2AC18/H2AC19	9.09057	0.00722718	0.024875
ENSG00000143631	FLG	1.25755	0.00732125	0.0251519
ENSG00000101134	DOK5	-2.37976	0.00733848	0.0252001
ENSG00000166148	AVPR1A	-1.08055	0.00738311	0.0253276
ENSG00000145198	VWA5B2	-1.23044	0.00741334	0.0254166
ENSG00000267432	DNAH17-AS1	1.36627	0.00743897	0.0254786
ENSG00000271781	CTD_2589H196	-1.23121	0.00751774	0.0257149
ENSG00000287251	AP003062.4	2.33878	0.00778066	0.0265145
ENSG00000185774	KCNIP4	-2.49908	0.00792899	0.026954
ENSG00000174946	GPR171	-2.80554	0.00797322	0.027081
ENSG00000142661	MYOM3	-1.47949	0.00801795	0.0272212
ENSG00000250508	LINC02701	-1.08091	0.00807585	0.0273707
ENSG00000258636	LOC105370469	-2.06191	0.00819045	0.0277114
ENSG00000125538	IL1B	-1.24149	0.00820125	0.02774
ENSG00000183169	POM121L1P	1.34681	0.00820495	0.0277469
ENSG00000187824	TMEM220	-1.01048	0.00824399	0.0278607
ENSG00000160801	PTH1R	-2.02172	0.00824899	0.0278736
ENSG00000113739	STC2	-1.10316	0.00828778	0.0279687
ENSG00000112619	PRPH2	-1.25211	0.00829485	0.0279886
ENSG00000286955	AC100858.4	-3.33531	0.00829731	0.0279929
ENSG00000169783	LINGO1	-1.2975	0.00831022	0.0280245
ENSG00000287979	AC253572.2	-1.11243	0.00832339	0.0280449
ENSG00000235097	LINC00330	1.32326	0.00836271	0.0281573
ENSG00000135636	DYSF	1.17245	0.00845396	0.028402
ENSG00000232759	LOC100506178	-1.33209	0.00845457	0.028402
ENSG00000286447	AC109782.1	-1.51063	0.00847949	0.028448
ENSG00000234814	SVIL2P	-1.03109	0.0084803	0.028448
ENSG00000204518	AADACL4	2.49027	0.00853661	0.0286126
ENSG00000197599	CCDC154	-1.01295	0.00879536	0.0293592
ENSG00000283361	CFAP97D2	1.75227	0.0088102	0.0293963
ENSG00000286081	LOC105373682	1.0329	0.00890049	0.0296716
ENSG00000077800	FKBP6	1.51942	0.00896853	0.0298504
ENSG00000205622	LOC400867	-1.13801	0.00896899	0.0298504
ENSG00000180938	ZNF572	-1.2812	0.00899058	0.0299138
ENSG00000233589	RP4_694A72	-1.62329	0.00902124	0.0300074
ENSG00000227544	LOC100506725	-1.13033	0.00903238	0.0300402
ENSG00000115353	TACR1	1.33164	0.00911076	0.0302753
ENSG00000146276	GABRR1	-1.28676	0.00917274	0.0304471
ENSG00000069011	PITX1	-1.37376	0.00919114	0.0304876
ENSG00000213885	RPL13AP7	2.76042	0.00925763	0.030673
ENSG00000277895	RP11_114F34	-1.24041	0.0092912	0.0307755
ENSG00000255425	OR8G3P	2.30752	0.0093655	0.0310136
ENSG00000125207	PIWIL1	-1.83554	0.00936568	0.0310136
ENSG00000178934	LGALS7/LGALS7B	1.10336	0.0094279	0.0311847
ENSG00000175946	KLHL38	1.23639	0.00960909	0.0317187
ENSG00000154864	PIEZO2	1.08482	0.00968318	0.0319398
ENSG00000280639	LINC02204	2.55225	0.00970112	0.0319856
ENSG00000164303	ENPP6	2.45831	0.00972015	0.0320394
ENSG00000275221	H2AC15	2.79526	0.00975833	0.0321384
ENSG00000285897	AC004687.2	-1.22207	0.00984796	0.0323971
ENSG00000274044	FAM230E (includes others)	-1.34866	0.00984977	0.0323971
ENSG00000153253	SCN3A	-1.49882	0.00998094	0.0327666
ENSG00000165194	PCDH19	-1.54706	0.0101424	0.033223
ENSG00000105894	PTN	-1.56491	0.0102565	0.033541
ENSG00000248714	LOC102724596	-2.35777	0.0102926	0.0336403
ENSG00000237372	UNQ6494	1.06253	0.0103199	0.0336878
ENSG00000250968	LINC02382	1.9404	0.010341	0.0337371
ENSG00000182950	ODF3L1	-1.3452	0.0103413	0.0337371
ENSG00000262136	CTD_2033A163	2.07622	0.0103635	0.0337789
ENSG00000139626	ITGB7	1.76213	0.0105569	0.0343053
ENSG00000268643	AC0064869	-1.64695	0.0106344	0.0345382
ENSG00000013619	MAMLD1	-1.21642	0.0106551	0.0345863
ENSG00000120217	CD274	-1.12403	0.0108088	0.0349798
ENSG00000285244	DINOL	1.28181	0.0109184	0.0352785
ENSG00000277299	RP11_837J74	3.14021	0.0109269	0.035299
ENSG00000267228	RP11-49K24.6	6.43205	0.0109822	0.0354487
ENSG00000215559	ANKRD20A11P	1.05465	0.0110176	0.0355387
ENSG00000215910	C1orf167	-2.76095	0.0112487	0.0361856
ENSG00000196747	H2AC13	1.02292	0.0113383	0.0364342
ENSG00000213233	RPL23AP62	-1.89015	0.0114028	0.0366214
ENSG00000172572	PDE3A	-1.58541	0.0114197	0.0366709
ENSG00000228013	IL6R-AS1	1.01045	0.0118106	0.0377722
ENSG00000261340	LINC01616	1.35551	0.0118151	0.0377722
ENSG00000149926	TLCD3B	-1.16768	0.0118163	0.0377722
ENSG00000234418	RP11_560I191	-1.27659	0.0119122	0.0380509
ENSG00000260084	RP11_615I21	-2.20171	0.011928	0.0380872
ENSG00000198054	DSCR8	2.42405	0.0119589	0.0381544
ENSG00000196566	RP11_57C133	1.61672	0.0120424	0.0383581
ENSG00000235885	LOC101927661	1.42072	0.0121285	0.0386009
ENSG00000227039	ITGB2-AS1	1.22175	0.0123169	0.0391323
ENSG00000279019	RP11_407G232	-1.53674	0.0127219	0.0402408
ENSG00000250049	LOC105379080	-1.60663	0.0128733	0.0406379
ENSG00000230457	PA2G4P4	1.80518	0.0129197	0.0407418
ENSG00000173077	DELEC1	1.21627	0.0129378	0.0407872
ENSG00000131477	RAMP2	-2.24657	0.0130147	0.0410189
ENSG00000073067	CYP2W1	-1.3468	0.0130745	0.0411743
ENSG00000257654	RP11_497G192	1.10542	0.0132644	0.0417002
ENSG00000215580	BCORP1	-1.21746	0.0134806	0.0422789
ENSG00000227087	RBMX2P5	-1.46783	0.0136347	0.0426886
ENSG00000185924	RTN4RL1	-1.08302	0.0136744	0.0427846
ENSG00000146374	RSPO3	1.94066	0.0136778	0.0427895
ENSG00000155754	C2CD6	-1.7023	0.0136851	0.0427897
ENSG00000225833	GS1-594A7.3	1.39994	0.0137194	0.0428857
ENSG00000165685	TMEM52B	-2.51433	0.0138085	0.0431163
ENSG00000227300	KRT16P2	1.32547	0.0138821	0.043314
ENSG00000118194	TNNT2	-1.03142	0.0139835	0.0435843
ENSG00000205488	CALML3-AS1	1.23453	0.0140509	0.043737
ENSG00000270072	RP11_750H97	-2.28869	0.0141537	0.0440134
ENSG00000286996	AC099332.2	1.3289	0.0141585	0.0440199
ENSG00000257335	MGAM	-2.82804	0.014226	0.0441949
ENSG00000184828	ZBTB7C	1.06083	0.0142689	0.0442875
ENSG00000220749	RPL21P28	1.82393	0.0145059	0.0449228
ENSG00000270022	RNU12	-1.25181	0.014629	0.0452329
ENSG00000223914	LINC02471	1.69229	0.0147446	0.0455129
ENSG00000277586	NEFL	1.27776	0.0147918	0.0456407
ENSG00000177112	IRAG1-AS1	1.81916	0.0148028	0.0456689
ENSG00000254968	LINC02763	1.5248	0.0148433	0.0457759
ENSG00000273032	DGCR5	1.17674	0.0148656	0.0458326
ENSG00000152086	TUBA3E	1.77932	0.0148701	0.0458406
ENSG00000227028	SLC8A1-AS1	-1.59132	0.0149708	0.0461065
ENSG00000231840	AC07334212	-1.62315	0.0151813	0.0466481
ENSG00000167037	SGSM1	1.35855	0.0151902	0.0466633
ENSG00000259645	RP11_253M76	1.0281	0.0153863	0.0472165
ENSG00000186009	ATP4B	2.26126	0.0153943	0.047235
ENSG00000235721	AC0132683	1.12899	0.0155206	0.0475917
ENSG00000231948	HS1BP3-IT1	1.50325	0.0156523	0.0479272
ENSG00000136630	HLX	-1.97132	0.0156737	0.0479865
ENSG00000277566	RP11_545P79	1.48821	0.015922	0.048665
ENSG00000276368	H2AC14	-1.75643	0.0160215	0.0489374
ENSG00000171433	GLOD5	1.23489	0.0162186	0.0494244
ENSG00000137251	TINAG	2.13843	0.0163878	0.0498694

## Sheet: Canonical Pathways
Canonical Pathways for My Projects->20200928 Brad Johnson->mut vs wt d702factor 2x q05
Ingenuity Canonical Pathways	-log(p-value)	zScore	Ratio	Molecules
Synaptogenesis Signaling Pathway	1.94	-3.7097	0.0705	ADCY2,ADCY4,BDNF,CACNB3,CADM1,CDH10,CDH2,CDH7,CHN1,CPLX2,DAB1,EPHA6,GRM4,NLGN1,NLGN2,NRXN3,SHF,SNAP25,SYN3,SYT2,SYT4,TIAM1
Estrogen Receptor Signaling	0	-2.88675	0.0366	ADCY2,ADCY4,CDKN1A,FBXO32,GNA15,GNG2,MMP10,MMP23B,PLCB1,PLCH2,SHF,VEGFA
IL-15 Production	0.88	-2.82843	0.0661	EPHA6,FES,FLT4,IL6,KDR,MUSK,PTK6,SYK
Nitric Oxide Signaling in the Cardiovascular System	0.638	-2.44949	0.0606	BDKRB2,FLT4,GUCY1A2,KDR,PDE3B,VEGFA
Synaptic Long Term Depression	0.58	-2.33333	0.0529	CACNB3,GNA15,GRID2,GRM4,GUCY1A2,NPR1,NPR3,PLAAT2,PLCB1,PLCH2
GP6 Signaling Pathway	0.909	-2.12132	0.0672	COL16A1,COL19A1,COL2A1,COL3A1,COL5A1,COL8A1,COL9A2,SYK
GŒ±q Signaling	1.18	-2.11058	0.0696	ADRA1B,AGTR1,AVPR1A,CHRM3,DIRAS3,GNA15,GNG2,HTR2C,PLCB1,PLD6,RGS4
Cardiac Hypertrophy Signaling (Enhanced)	3.47	-2.05798	0.076	ACVR1C,ADCY2,ADCY4,ADRA1B,ADRA2A,AGTR1,CD70,ENPP6,FGF11,FGF9,GNA15,GNG2,IL13RA2,IL1B,IL6,INPP5F,ITGA4,ITGA5,MAPK11,MAPK12,MEF2C,NPPB,NPR1,PDE10A,PDE3A,PDE3B,PDE4B,PDE8B,PDK1,PLCB1,PLCH2,PLD6,SMO,TNFSF10,WNT1,WNT11,WNT5A
G Beta Gamma Signaling	0	-2	0.0328	ADCY2,CACNB3,GNA15,GNG2
PI3K Signaling in B Lymphocytes	0	-2	0.0362	INPP5D,IRS4,PLCB1,PLCH2,SYK
Role of NFAT in Regulation of the Immune Response	0	-2	0.0276	GNA15,GNG2,MEF2C,PLCB1,SYK
Synaptic Long Term Potentiation	0	-2	0.031	GNA15,GRM4,PLCB1,PLCH2
p70S6K Signaling	0	-2	0.031	AGTR1,PLCB1,PLCH2,SYK
HIF1Œ± Signaling	1.92	-2	0.078	ADRA1B,CDKN1A,EGLN3,FLT4,IL6,KDR,LDHA,MMP10,MMP23B,SLC2A1,SLC2A14,SLC2A2,SLC2A3,TF,VEGFA,VIM
Phospholipase C Signaling	0	-1.88982	0.0389	ADCY2,ADCY4,DIRAS3,GNG2,ITGA4,ITGA5,MEF2C,PLCB1,PLD6,SYK
Dendritic Cell Maturation	0.306	-1.88982	0.0437	COL2A1,COL3A1,IL1B,IL6,MAPK11,MAPK12,PLCB1,PLCH2
GPCR-Mediated Nutrient Sensing in Enteroendocrine Cells	0.731	-1.88982	0.0625	ADCY2,ADCY4,CACNB3,GNA15,GNG2,PLCB1,PLCH2
Sperm Motility	1.08	-1.88982	0.0628	EPHA6,FES,FLT4,GUCY1A2,KDR,MUSK,NPPB,NPR1,PDE4B,PLAAT2,PLCB1,PLCH2,PTK6,SYK
Aryl Hydrocarbon Receptor Signaling	2.17	-1.88982	0.0909	AHRR,ALDH1A3,CCND2,CDKN1A,CYP1A1,CYP1A2,CYP1B1,GSTA2,IL1B,IL6,NCOA7,NFIX,NQO1
tRNA Splicing	2.74	-1.88982	0.163	ENPP6,PDE10A,PDE3A,PDE3B,PDE4B,PDE8B,PLD6
Insulin Secretion Signaling Pathway	1.08	-1.80739	0.0617	ADCY2,ADCY4,CHRM3,GNA15,KLF11,MAPK11,MAPK12,PCSK1,PLCB1,PLCH2,SLC2A1,SLC2A14,SLC2A2,SLC2A3,SNAP25
Adrenomedullin signaling pathway	2.43	-1.80739	0.0863	ADCY2,ADCY4,GNA15,GUCY1A2,IL1B,KCNQ2,MAPK11,MAPK12,MAPK4,MYLK2,NPR1,NPR3,PLCB1,PLCH2,RAMP2,SHF,TFAP2A
Role of NFAT in Cardiac Hypertrophy	0.398	-1.66667	0.0467	ADCY2,ADCY4,CACNB3,GNG2,IL6,MAPK11,MAPK12,MEF2C,PLCB1,PLCH2
Cardiac Œ≤-adrenergic Signaling	1.15	-1.66667	0.0709	ADCY2,ADCY4,ENPP6,GNG2,PDE10A,PDE3A,PDE3B,PDE4B,PDE8B,PLD6
CREB Signaling in Neurons	0.306	-1.63299	0.0435	ADCY2,ADCY4,CACNB3,GNA15,GNG2,GRID2,GRM4,PLCB1,PLCH2
TREM1 Signaling	1.04	-1.63299	0.08	CASP1,CXCL3,IL1B,IL6,ITGA5,NLRP2
Hepatic Fibrosis Signaling Pathway	2.2	-1.56893	0.0707	ACTA2,ACVR1C,AGTR1,CNR1,COL2A1,COL3A1,DIRAS3,FLT4,GLI3,IL1B,IL1RAP,ITGA4,ITGA5,KDR,LEF1,MAPK11,MAPK12,MYLK2,PDK1,SMO,SPP1,TF,VEGFA,WNT1,WNT11,WNT5A
Endothelin-1 Signaling	1.29	-1.50756	0.0691	ADCY2,ADCY4,CASP1,GNA15,GUCY1A2,MAPK11,MAPK12,MAPK4,PLAAT2,PLCB1,PLCH2,PLD6,SHF
Endocannabinoid Neuronal Synapse Pathway	2.14	-1.50756	0.0938	ADCY2,ADCY4,CACNB3,CNR1,GNA15,GNG2,MAPK11,MAPK12,MAPK4,PLCB1,PLCH2,RIMS1
White Adipose Tissue Browning Pathway	3.01	-1.38675	0.109	ADCY2,ADCY4,BDNF,CACNB3,DIO2,GUCY1A2,KDR,LDHA,MAPK11,MAPK12,NPPB,NPR1,PRDM16,VEGFA
NF-Œ∫B Signaling	0	-1.34164	0.0279	FLT4,IL1B,KDR,TNFAIP3,TNFRSF11A
P2Y Purigenic Receptor Signaling Pathway	0	-1.34164	0.0394	ADCY2,ADCY4,GNG2,PLCB1,PLCH2
Cholecystokinin/Gastrin-mediated Signaling	0.256	-1.34164	0.042	DIRAS3,IL1B,MAPK12,MEF2C,PLCB1
Dopamine-DARPP32 Feedback in cAMP Signaling	0.284	-1.34164	0.0429	ADCY2,ADCY4,CALY,GUCY1A2,KCNJ2,PLCB1,PLCH2
Phospholipases	1.3	-1.34164	0.0938	LIPG,PLA1A,PLAAT2,PLCB1,PLCH2,PLD6
cAMP-mediated signaling	3.64	-1.2792	0.0965	ADCY2,ADCY4,ADRA2A,AGTR1,CHRM2,CHRM3,CNR1,ENPP6,GRM4,HTR1E,MC4R,NPR3,OPRK1,PDE10A,PDE3A,PDE3B,PDE4B,PDE8B,PLD6,PTH1R,RGS4,VIPR1
eNOS Signaling	1.16	-1.26491	0.0692	ADCY2,ADCY4,AQP10,BDKRB2,CHRM2,CHRM3,CHRNA2,FLT4,GUCY1A2,KDR,VEGFA
Cardiac Hypertrophy Signaling	0.695	-1.1547	0.0542	ADCY2,ADCY4,ADRA1B,ADRA2A,DIRAS3,GNA15,GNG2,IL6,MAPK11,MAPK12,MEF2C,PLCB1,PLCH2
Coronavirus Pathogenesis Pathway	0.363	-1.13389	0.0467	AGTR1,CASP1,EEF1A2,IL1B,IL6,MAPK11,MAPK12
STAT3 Pathway	1.26	-1.13389	0.0741	CDKN1A,FLT4,IL13RA2,IL1B,KDR,MAPK11,MAPK12,SOCS2,TNFRSF11A,VEGFA
LPS/IL-1 Mediated Inhibition of RXR Function	3.34	-1.13389	0.0938	ABCC2,ACOX2,ACSL5,ALDH1A3,CHST11,CHST2,CHST4,CYP2A6 (includes others),CYP2B6,GSTA2,HS3ST6,IL1B,IL1RAP,PLTP,SLC27A6,SLCO1A2,SULT1A1,SULT1A2,SULT1A3/SULT1A4,SULT1C4,SULT1E1
Calcium Signaling	0	-1	0.0388	ACTA2,CACNB3,CHRNA2,MEF2C,PNCK,TNNT2,TNNT3,TRPV6
Ephrin Receptor Signaling	0	-1	0.0333	EPHA6,GNA15,GNG2,ITGA4,ITGA5,VEGFA
Systemic Lupus Erythematosus In B Cell Signaling Pathway	0	-1	0.0327	CCND2,CD70,IL1B,IL6,INPP5D,INPP5F,SHF,SYK,TNFSF10
VEGF Signaling	0	-1	0.0404	ACTA2,FLT4,KDR,VEGFA
p38 MAPK Signaling	0.262	-1	0.0424	IL1B,IL1RAP,MAPK11,MAPK12,MEF2C
HMGB1 Signaling	0.273	-1	0.0424	CD70,DIRAS3,IL1B,IL6,MAPK11,MAPK12,TNFSF10
IL-8 Signaling	0.344	-1	0.045	CCND2,DIRAS3,FLT4,GNG2,ITGB2,KDR,MAPK12,PLD6,VEGFA
Signaling by Rho Family GTPases	0.36	-1	0.0451	ACTA2,CDH10,CDH2,CDH7,DIRAS3,GNA15,GNG2,ITGA4,ITGA5,MAPK12,VIM
GDNF Family Ligand-Receptor Interactions	0.409	-1	0.0526	ARTN,DOK5,DOK6,MAPK12
Role of Pattern Recognition Receptors in Recognition of Bacteria and Viruses	0.506	-1	0.0519	CASP1,CD70,IL1B,IL6,MAPK12,PTX3,SYK,TNFSF10
Wnt/Ca+ pathway	0.589	-1	0.0645	PLCB1,PLCH2,SMO,WNT5A
D-myo-inositol-5-phosphate Metabolism	0.682	-1	0.0573	ACP5,DUSP13,INPP5F,MTMR7,MTMR8,NUDT16,PLCB1,PPFIA4,PTPN20
14-3-3-mediated Signaling	0.796	-1	0.063	MAPK12,PLCB1,PLCH2,TUBA3E,TUBB1,TUBB2B,TUBB8,VIM
IL-17A Signaling in Airway Cells	0.896	-1	0.0781	CXCL3,CXCL6,IL6,MAPK11,MAPK12
Intrinsic Prothrombin Activation Pathway	1.53	-1	0.119	COL2A1,COL3A1,F5,KLK12,PROC
Apelin Liver Signaling Pathway	1.67	-1	0.154	APLN,COL2A1,COL3A1,MAPK12
Osteoarthritis Pathway	4.13	-0.942809	0.104	ADAMTS5,ANKH,CASP1,CCN4,COL2A1,CTNNA2,DCN,FRZB,GLI3,H19,IL1B,IL1RAP,ITGA4,ITGA5,LEF1,MEF2C,MMP10,PTH1R,S100A9,SMO,SPP1,VEGFA
Superpathway of Inositol Phosphate Compounds	0.682	-0.904534	0.0553	ACP5,DUSP13,INPP5D,INPP5F,ITPKA,MTMR7,MTMR8,NUDT16,PLCB1,PPFIA4,PTPN20
Systemic Lupus Erythematosus In T Cell Signaling Pathway	0	-0.816497	0.018	CASP1,CD70,DIRAS3,IL6,PDK1,SYK
Thrombin Signaling	0.301	-0.816497	0.0433	ADCY2,ADCY4,DIRAS3,GNA15,GNG2,MAPK11,MAPK12,PLCB1,PLCH2
GNRH Signaling	0.365	-0.816497	0.0462	ADCY2,ADCY4,CACNB3,GNA15,GNG2,MAPK11,MAPK12,PLCB1
CXCR4 Signaling	0.405	-0.816497	0.0479	ADCY2,ADCY4,DIRAS3,ELMO1,GNA15,GNG2,MAPK12,PLCB1
Sphingosine-1-phosphate Signaling	0.443	-0.816497	0.0513	ADCY2,ADCY4,CASP1,DIRAS3,PLCB1,PLCH2
IL-6 Signaling	0.577	-0.816497	0.056	CRP,IL1B,IL1RAP,IL6,MAPK11,MAPK12,VEGFA
Apelin Endothelial Signaling Pathway	0.693	-0.816497	0.0609	ADCY2,ADCY4,APLN,KLF2,MAPK12,MEF2C,PLCB1
Endocannabinoid Developing Neuron Pathway	0.693	-0.816497	0.0609	ADCY2,ADCY4,CNR1,GNG2,MAPK11,MAPK12,MAPK4
Apelin Cardiomyocyte Signaling Pathway	0.926	-0.816497	0.0707	APLN,MAPK11,MAPK12,MAPK4,PLCB1,PLCH2,SLC9A2
3-phosphoinositide Biosynthesis	0.412	-0.707107	0.0482	ACP5,DUSP13,INPP5F,MTMR7,MTMR8,NUDT16,PPFIA4,PTPN20
T Cell Exhaustion Signaling Pathway	0.515	-0.707107	0.0514	ACVR1C,BATF,CD274,IL6,KDR,MAPK12,PDK1,PRDM1,VEGFA
D-myo-inositol (1,4,5,6)-Tetrakisphosphate Biosynthesis	0.62	-0.707107	0.0563	ACP5,DUSP13,INPP5F,MTMR7,MTMR8,NUDT16,PPFIA4,PTPN20
D-myo-inositol (3,4,5,6)-tetrakisphosphate Biosynthesis	0.62	-0.707107	0.0563	ACP5,DUSP13,INPP5F,MTMR7,MTMR8,NUDT16,PPFIA4,PTPN20
Semaphorin Neuronal Repulsive Signaling Pathway	0.758	-0.707107	0.0615	DPYSL3,FES,GUCY1A2,ITGA4,ITGA5,PDE4B,SEMA3A,SEMA6D
GŒ±s Signaling	1.11	-0.707107	0.0748	ADCY2,ADCY4,CHRM3,CNR1,GNG2,MC4R,PTH1R,VIPR1
Relaxin Signaling	3.28	-0.707107	0.107	ADCY2,ADCY4,ENPP6,GNA15,GNG2,GUCY1A2,NPR1,NPR3,PDE10A,PDE3A,PDE3B,PDE4B,PDE8B,PLD6,RLN3,VEGFA
Protein Kinase A Signaling	1.34	-0.688247	0.0602	ADCY2,ADCY4,ENPP6,FLNC,GLI3,GNG2,GRK1,H1-4,LEF1,MYLK2,NTN1,PDE10A,PDE3A,PDE3B,PDE4B,PDE8B,PLCB1,PLCH2,PLD6,PTPRB,PTPRG,PTPRR,PTPRZ1,SMO
Endocannabinoid Cancer Inhibition Pathway	1.12	-0.632456	0.0699	ADCY2,ADCY4,CASP1,CCND2,CDKN1A,CNR1,LEF1,SNAI2,VEGFA,VIM
GŒ±i Signaling	2.22	-0.57735	0.096	ADCY2,ADCY4,ADRA2A,AGTR1,CHRM2,CNR1,GNG2,GRM4,HTR1E,NPR3,OPRK1,RGS4
Colorectal Cancer Metastasis Signaling	0.766	-0.534522	0.0553	ADCY2,ADCY4,DIRAS3,GNG2,IL6,LEF1,MAPK12,MMP10,MMP23B,SMO,VEGFA,WNT1,WNT11,WNT5A
B Cell Receptor Signaling	0	-0.447214	0.0324	INPP5D,INPP5F,MAPK11,MAPK12,MEF2C,SYK
Huntington's Disease Signaling	0	-0.447214	0.0338	BDNF,CASP1,CPLX2,GNA15,GNG2,PLCB1,SNAP25,TAF9B
PI3K/AKT Signaling	0	-0.447214	0.0343	CDKN1A,IL13RA2,INPP5D,INPP5F,ITGA4,ITGA5
HGF Signaling	0.307	-0.447214	0.045	CDKN1A,IL6,ITGA4,ITGA5,MAPK12
Mouse Embryonic Stem Cell Pluripotency	0.588	-0.447214	0.0583	LEF1,MAPK11,MAPK12,POU5F1,SMO,ZFP42
Netrin Signaling	0.875	-0.447214	0.0769	ABLIM3,CACNB3,NTN1,UNC5B,UNC5C
TGF-Œ≤ Signaling	0.978	-0.447214	0.0729	ACVR1C,INHA,INHBB,MAPK11,MAPK12,PITX2,VDR
Coagulation System	1.85	-0.447214	0.143	BDKRB2,F5,PLAUR,PROC,SERPINA5
Glioblastoma Multiforme Signaling	0.602	-0.333333	0.0545	CDKN1A,DIRAS3,LEF1,PLCB1,PLCH2,SMO,WNT1,WNT11,WNT5A
3-phosphoinositide Degradation	0.693	-0.333333	0.0577	ACP5,DUSP13,INPP5D,INPP5F,MTMR7,MTMR8,NUDT16,PPFIA4,PTPN20
Reelin Signaling in Neurons	1.05	-0.333333	0.0698	CDH2,CNR1,DAB1,ITGA4,ITGA5,ITGB2,MAPK12,PDK1,PDK4
Leukocyte Extravasation Signaling	1.16	-0.333333	0.066	ACTA2,CLDN18,CLDN5,CLDN8,CTNNA2,CTNNA3,ITGA4,ITGA5,ITGB2,MAPK11,MAPK12,MMP10,MMP23B
Insulin Receptor Signaling	0	0	0.0286	INPP5D,INPP5F,IRS4,PDE3B
Pancreatic Adenocarcinoma Signaling	0	0	0.0367	CDKN1A,MAPK12,PLD6,VEGFA
FcŒ≥ Receptor-mediated Phagocytosis in Macrophages and Monocytes	0.257	0	0.0426	ACTA2,INPP5D,PLD6,SYK
Regulation of Actin-based Motility by Rho	0.257	0	0.0426	ACTA2,DIRAS3,ITGA4,ITGA5
Fc Epsilon RI Signaling	0.268	0	0.0427	INPP5D,INPP5F,MAPK11,MAPK12,SYK
Role of PKR in Interferon Induction and Antiviral Response	0.268	0	0.0427	CASP1,IL1B,MAPK11,MAPK12,SCARA3
Type I Diabetes Mellitus Signaling	0.307	0	0.045	IL1B,IL1RAP,MAPK11,MAPK12,SOCS2
Opioid Signaling Pathway	0.478	0	0.0486	ADCY2,ADCY4,CACNB3,GNG2,GRK1,MAPK12,MAPK4,OPRK1,PDK1,PLCB1,RGS4,RGS5
Regulation Of The Epithelial Mesenchymal Transition By Growth Factors Pathway	0.589	0	0.0532	CD70,CDH2,FGF11,FGF9,IL6,MAPK11,MAPK12,SNAI2,TNFSF10,VIM
Neuropathic Pain Signaling In Dorsal Horn Neurons	0.612	0	0.0594	BDNF,GRM4,KCNQ2,PLCB1,PLCH2,TACR1
AMPK Signaling	0.739	0	0.0561	ADRA1B,ADRA2A,AK1,AK5,CDKN1A,CHRM2,CHRM3,CHRNA2,MAPK11,MAPK12,PFKFB4,SLC2A1
Neuroinflammation Signaling Pathway	0.918	0	0.0569	ACVR1C,BDNF,CASP1,CD200,CRP,CXCL10,GABRB2,GABRR1,IL1B,IL6,MAPK11,MAPK12,MAPK4,SLC6A1,SLC6A13,SYK,WNT1
Factors Promoting Cardiogenesis in Vertebrates	2.4	0	0.0933	ACVR1C,BMP5,CER1,GJA5,LEF1,MAPK12,MEF2C,NPPB,PLCB1,PLCH2,SMO,WNT1,WNT11,WNT5A
Acute Phase Response Signaling	2.87	0	0.095	APCS,APOA2,C1R,C4BPB,CP,CRABP2,CRP,IL1B,IL1RAP,IL6,MAPK11,MAPK12,SAA1,SAA2,SAA4,SOCS2,TF
Corticotropin Releasing Hormone Signaling	2.97	0	0.103	ADCY2,ADCY4,BDNF,CACNB3,CNR1,GLI3,GUCY1A2,IVL,MAPK11,MAPK12,MEF2C,NPR1,NPR3,SMO,VEGFA
HOTAIR Regulatory Pathway	1.15	0.301511	0.0688	AR,CDKN1A,LEF1,MMP10,MMP23B,SNAI2,SPP1,VIM,WNT1,WNT11,WNT5A
Chondroitin Sulfate Biosynthesis (Late Stages)	3.85	0.333333	0.188	CHST11,CHST2,CHST4,HS3ST6,SULT1A1,SULT1A2,SULT1A3/SULT1A4,SULT1C4,SULT1E1
Dermatan Sulfate Biosynthesis (Late Stages)	4	0.333333	0.196	CHST11,CHST2,CHST4,HS3ST6,SULT1A1,SULT1A2,SULT1A3/SULT1A4,SULT1C4,SULT1E1
Thyroid Hormone Metabolism II (via Conjugation and/or Degradation)	4.7	0.333333	0.237	DIO2,LARGE1,SULT1A1,SULT1A2,SULT1A3/SULT1A4,SULT1C4,UGT1A1,UGT1A3,UGT2B11
Regulation Of The Epithelial Mesenchymal Transition In Development Pathway	1.63	0.377964	0.0952	GLI3,LEF1,LOX,SMO,SNAI2,WNT1,WNT11,WNT5A
Apelin Adipocyte Signaling Pathway	1.69	0.377964	0.0976	ADCY2,ADCY4,APLN,CLIC2,GPX2,MAPK11,MAPK12,MAPK4
Actin Cytoskeleton Signaling	0	0.447214	0.0367	ACTA2,FGD3,FGF11,FGF9,ITGA4,ITGA5,MYLK2,TIAM1
Inhibition of ARE-Mediated mRNA Degradation Pathway	0	0.447214	0.041	CD70,MAPK11,MAPK12,MAPK4,TNFSF10
Tec Kinase Signaling	0.427	0.447214	0.0488	ACTA2,DIRAS3,GNA15,GNG2,ITGA4,ITGA5,MAPK12,TNFSF10
CDK5 Signaling	0.532	0.447214	0.0556	ADCY2,ADCY4,BDNF,MAPK11,MAPK12,MAPK4
BMP signaling pathway	1.2	0.447214	0.0824	BMP5,CHRD,FST,MAPK11,MAPK12,PITX2,SOSTDC1
Dopamine Degradation	2.13	0.447214	0.167	ALDH1A3,SULT1A1,SULT1A2,SULT1A3/SULT1A4,SULT1C4
Senescence Pathway	0.324	0.57735	0.0436	ACVR1C,CDKN1A,CGAS,DELEC1,IL6,MAPK12,MAPK4,PDK1,PDK4,SAA1,SAA2,SAA4
Integrin Signaling	0.562	0.632456	0.0516	ACTA2,DIRAS3,ITGA4,ITGA5,ITGA8,ITGA9,ITGB2,ITGB7,MYLK2,PARVB,TSPAN5
Dermatan Sulfate Biosynthesis	3.84	0.632456	0.169	B3GAT1,CHST11,CHST2,CHST4,HS3ST6,SULT1A1,SULT1A2,SULT1A3/SULT1A4,SULT1C4,SULT1E1
Chondroitin Sulfate Biosynthesis	4.03	0.632456	0.179	B3GAT1,CHST11,CHST2,CHST4,HS3ST6,SULT1A1,SULT1A2,SULT1A3/SULT1A4,SULT1C4,SULT1E1
Agrin Interactions at Neuromuscular Junction	0.975	0.816497	0.0769	ACTA2,ITGA4,ITGA5,ITGB2,MAPK12,MUSK
Heparan Sulfate Biosynthesis (Late Stages)	3.8	0.904534	0.155	CHST11,CHST2,CHST4,EXTL1,HS3ST6,PLA1A,SULT1A1,SULT1A2,SULT1A3/SULT1A4,SULT1C4,SULT1E1
Cdc42 Signaling	0	1	0.0299	FGD3,ITGA4,ITGA5,MAPK11,MAPK12
Salvage Pathways of Pyrimidine Ribonucleotides	0	1	0.0408	AK1,AK5,APOBEC2,CDA
Sumoylation Pathway	0	1	0.0388	AR,ARHGDIB,DIRAS3,MAPK12
Role of Wnt/GSK-3Œ≤ Signaling in the Pathogenesis of Influenza	0.649	1	0.0641	LEF1,SMO,WNT1,WNT11,WNT5A
Paxillin Signaling	1.44	1	0.0833	ACTA2,ITGA4,ITGA5,ITGA8,ITGA9,ITGB2,ITGB7,MAPK11,MAPK12
Antioxidant Action of Vitamin C	2.24	1	0.101	GLRX,MAPK11,MAPK12,PLAAT2,PLCB1,PLCH2,PLD6,SLC2A1,SLC2A14,SLC2A2,SLC2A3
Natural Killer Cell Signaling	0	1.13389	0.0355	COL2A1,COL3A1,MAPK11,MAPK12,SYK,TNFSF10,ULBP2
BEX2 Signaling Pathway	1.34	1.13389	0.0886	CDH2,CDKN1A,LEF1,MAPK12,NHLH2,SPP1,VEGFA
PCP pathway	1.92	1.13389	0.117	CTHRC1,MAPK12,RSPO3,SMO,WNT1,WNT11,WNT5A
Heparan Sulfate Biosynthesis	4.06	1.1547	0.154	B3GAT1,CHST11,CHST2,CHST4,EXTL1,HS3ST6,PLA1A,SULT1A1,SULT1A2,SULT1A3/SULT1A4,SULT1C4,SULT1E1
Serotonin Degradation	3.37	1.26491	0.149	ADH1C,ALDH1A3,LARGE1,SULT1A1,SULT1A2,SULT1A3/SULT1A4,SULT1C4,UGT1A1,UGT1A3,UGT2B11
GŒ±12/13 Signaling	0	1.34164	0.0385	CDH10,CDH2,CDH7,MAPK12,MEF2C
RhoGDI Signaling	0.662	1.41421	0.0556	ACTA2,ARHGDIB,CDH10,CDH2,CDH7,DIRAS3,GNA15,GNG2,ITGA4,ITGA5
PPARŒ±/RXRŒ± Activation	0.771	1.41421	0.0579	ACVR1C,ADCY2,ADCY4,APOA2,GNA15,IL1B,IL1RAP,IL6,MEF2C,PLCB1,PLCH2
ILK Signaling	1.26	1.50756	0.0684	ACTA2,DIRAS3,DSP,FLNC,IRS4,ITGB2,ITGB7,LEF1,MAPK12,PARVB,SNAI2,VEGFA,VIM
Wnt/Œ≤-catenin Signaling	1.54	1.50756	0.0751	ACVR1C,CDH2,FRZB,GJA1,LEF1,POU5F1,SFRP4,SMO,SOX21,SOX5,WNT1,WNT11,WNT5A
Production of Nitric Oxide and Reactive Oxygen Species in Macrophages	0	1.63299	0.0372	APOA2,APOB,APOD,DIRAS3,MAPK11,MAPK12,SAA4
Basal Cell Carcinoma Signaling	1.52	1.63299	0.0972	BMP5,GLI3,LEF1,SMO,WNT1,WNT11,WNT5A
PTEN Signaling	1.1	1.66667	0.0714	CDKN1A,FLT4,INPP5D,INPP5F,ITGA4,ITGA5,KDR,PREX2,TNFRSF11A
GPCR-Mediated Integration of Enteroendocrine Signaling Exemplified by an L Cell	2.49	1.66667	0.123	ADCY2,ADCY4,CHRM2,GALR1,GNA15,GRP,PLCB1,PLCH2,VIPR1
Xenobiotic Metabolism PXR Signaling Pathway	2.55	1.69775	0.0885	ABCC2,ALDH1A3,CHST11,CHST2,CHST4,CYP2B6,GSTA2,HS3ST6,SULT1A1,SULT1A2,SULT1A3/SULT1A4,SULT1C4,SULT1E1,UGT1A1,UGT1A3,UGT2B11,UGT8
Sirtuin Signaling Pathway	0	1.73205	0.0412	CPS1,H1-4,LDHA,MAPK12,MAPK4,MYCN,NDRG1,NDUFA4L2,NQO1,PDK1,SLC2A1,TUBA3E
Xenobiotic Metabolism AHR Signaling Pathway	3.7	1.73205	0.141	ABCG2,AHRR,ALDH1A3,CYP1A1,CYP1A2,CYP1B1,GSTA2,IL1B,IL6,NQO1,UGT1A1,UGT1A3
Xenobiotic Metabolism General Signaling Pathway	1.12	1.89737	0.0699	GSTA2,MAPK11,MAPK12,NQO1,SLC51B,SLC9C2,UGT1A1,UGT1A3,UGT2B11,UGT8
Th2 Pathway	0.3	2	0.0441	ACVR1C,CCR1,CCR3,CXCR6,HAVCR1,ITGB2
Retinoate Biosynthesis I	1.29	2	0.118	ADH1C,AKR1B10,AKR1C3,ALDH1A3
Xenobiotic Metabolism CAR Signaling Pathway	3.45	2.06474	0.101	ABCC2,ALDH1A3,CHST11,CHST2,CHST4,CYP1A1,CYP1A2,CYP2B6,GSTA2,HS3ST6,SULT1A1,SULT1A2,SULT1A3/SULT1A4,SULT1C4,SULT1E1,UGT1A1,UGT1A3,UGT2B11,UGT8
Superpathway of Melatonin Degradation	6.45	2.13809	0.215	CYP1A1,CYP1A2,CYP1B1,CYP2A6 (includes others),CYP2B6,CYP4B1,LARGE1,SULT1A1,SULT1A2,SULT1A3/SULT1A4,SULT1C4,UGT1A1,UGT1A3,UGT2B11
Melatonin Degradation I	6.91	2.13809	0.233	CYP1A1,CYP1A2,CYP1B1,CYP2A6 (includes others),CYP2B6,CYP4B1,LARGE1,SULT1A1,SULT1A2,SULT1A3/SULT1A4,SULT1C4,UGT1A1,UGT1A3,UGT2B11
VDR/RXR Activation	2.3	2.23607	0.115	CDKN1A,CXCL10,HSD17B2,IGFBP3,IGFBP6,SPP1,TRPV6,VDR,WT1
Acetone Degradation I (to Methylglyoxal)	2.81	2.44949	0.194	CYP1A1,CYP1A2,CYP1B1,CYP2A6 (includes others),CYP2B6,CYP4B1
Bupropion Degradation	3.34	2.44949	0.24	CYP1A1,CYP1A2,CYP1B1,CYP2A6 (includes others),CYP2B6,CYP4B1
Nicotine Degradation II	3.48	2.52982	0.154	CYP1A1,CYP1A2,CYP1B1,CYP2A6 (includes others),CYP2B6,CYP4B1,LARGE1,UGT1A1,UGT1A3,UGT2B11
Nicotine Degradation III	3.97	2.52982	0.175	CYP1A1,CYP1A2,CYP1B1,CYP2A6 (includes others),CYP2B6,CYP4B1,LARGE1,UGT1A1,UGT1A3,UGT2B11
LXR/RXR Activation	3.82	2.67261	0.124	A1BG,APOA2,APOB,APOD,IL1B,IL1RAP,IL6,PLTP,PON3,SAA1,SAA2,SAA4,SCD,TF,UGT1A3
Estrogen Biosynthesis	3.61	2.82843	0.195	AKR1C3,CYP1A1,CYP1A2,CYP1B1,CYP2A6 (includes others),CYP2B6,CYP4B1,HSD17B2
ATM Signaling	0		0.0309	CDKN1A,MAPK11,MAPK12
Activation of IRF by Cytosolic Pattern Recognition Receptors	0		0.0317	IL6,MAPK12
Acute Myeloid Leukemia Signaling	0		0.0112	LEF1
Adipogenesis pathway	0		0.0149	SMO,WNT5A
Aldosterone Signaling in Epithelial Cells	0		0.0253	CRYAB,PLCB1,PLCH2,SMO
Amyloid Processing	0		0.04	MAPK11,MAPK12
Amyotrophic Lateral Sclerosis Signaling	0		0.0412	CASP1,GRID2,NEFL,VEGFA
Androgen Signaling	0		0.0368	AR,CACNB3,GNA15,GNG2,SRY
Assembly of RNA Polymerase II Complex	0		0.02	TAF9B
Autophagy	0		0.0328	CTSF,CTSV
BAG2 Signaling Pathway	0		0.0233	CDKN1A
CCR3 Signaling in Eosinophils	0		0.0403	CCR3,GNG2,MAPK11,MAPK12,PLCB1
CD27 Signaling in Lymphocytes	0		0.0377	CD70,MAPK12
CD28 Signaling in T Helper Cells	0		0.0167	MAPK12,SYK
CTLA4 Signaling in Cytotoxic T Lymphocytes	0		0.0112	SYK
Cell Cycle: G1/S Checkpoint Regulation	0		0.0299	CCND2,CDKN1A
Cell Cycle: G2/M DNA Damage Checkpoint Regulation	0		0.0204	CDKN1A
Chronic Myeloid Leukemia Signaling	0		0.00971	CDKN1A
Crosstalk between Dendritic Cells and Natural Killer Cells	0		0.0337	ACTA2,IL6,TNFSF10
Cyclins and Cell Cycle Regulation	0		0.0247	CCND2,CDKN1A
D-myo-inositol (1,4,5)-Trisphosphate Biosynthesis	0		0.04	PLCB1
DNA Methylation and Transcriptional Repression Signaling	0		0.0286	H4C8
Death Receptor Signaling	0		0.033	ACTA2,ARHGDIB,TNFSF10
Docosahexaenoic Acid (DHA) Signaling	0		0.0263	IL1B
Dopamine Receptor Signaling	0		0.039	ADCY2,ADCY4,CALY
EGF Signaling	0		0.0364	MAPK11,MAPK12
EIF2 Signaling	0		0.0134	ACTA2,MYCN,VEGFA
ERK/MAPK Signaling	0		0.0155	ITGA4,ITGA5,MYCN
ERK5 Signaling	0		0.0139	MEF2C
Endometrial Cancer Signaling	0		0.0333	CTNNA2,LEF1
Ephrin A Signaling	0		0.0213	EPHA6
Ephrin B Signaling	0		0.0278	GNA15,GNG2
ErbB Signaling	0		0.0213	MAPK11,MAPK12
Estrogen-Dependent Breast Cancer Signaling	0		0.0135	HSD17B2
Estrogen-mediated S-phase Entry	0		0.0385	CDKN1A
FLT3 Signaling in Hematopoietic Progenitor Cells	0		0.0375	INPP5D,MAPK11,MAPK12
Glioma Invasiveness Signaling	0		0.027	DIRAS3,PLAUR
Glioma Signaling	0		0.00909	CDKN1A
Glutathione-mediated Detoxification	0		0.0312	GSTA2
HER-2 Signaling in Breast Cancer	0		0.0357	CDKN1A,ITGB2,ITGB7
Hematopoiesis from Pluripotent Stem Cells	0		0.0204	IL6
Hereditary Breast Cancer Signaling	0		0.00714	CDKN1A
Hypoxia Signaling in the Cardiovascular System	0		0.0405	LDHA,NQO1,VEGFA
IGF-1 Signaling	0		0.0385	IGFBP3,IGFBP6,IGFBP7,SOCS2
IL-15 Signaling	0		0.04	MAPK11,MAPK12,SYK
IL-2 Signaling	0		0.0164	SYK
IL-23 Signaling Pathway	0		0.0227	IL1B
IL-3 Signaling	0		0.0127	INPP5D
IL-4 Signaling	0		0.0235	INPP5D,INPP5F
IL-7 Signaling Pathway	0		0.0385	MAPK11,MAPK12,SLC2A1
IL-9 Signaling	0		0.0303	SOCS2
Induction of Apoptosis by HIV1	0		0.0164	MAPK12
JAK/Stat Signaling	0		0.0375	CDKN1A,IL6,SOCS2
Kinetochore Metaphase Signaling Pathway	0		0.0099	H2AC18/H2AC19
LPS-stimulated MAPK Signaling	0		0.0244	MAPK11,MAPK12
MIF Regulation of Innate Immunity	0		0.0238	MAPK12
Macropinocytosis Signaling	0		0.0395	ITGA5,ITGB2,ITGB7
Mechanisms of Viral Exit from Host Cells	0		0.0244	ACTA2
Melanocyte Development and Pigmentation Signaling	0		0.0213	ADCY2,ADCY4
Melanoma Signaling	0		0.02	CDKN1A
Mitochondrial Dysfunction	0		0.0117	MAPK12,NDUFA4L2
NER Pathway	0		0.00971	H4C8
NF-Œ∫B Activation by Viruses	0		0.0366	ITGA4,ITGA5,ITGB2
NGF Signaling	0		0.00877	MAPK12
NRF2-mediated Oxidative Stress Response	0		0.0265	ABCC2,ACTA2,GPX2,GSTA2,NQO1
Necroptosis Signaling Pathway	0		0.0127	CASP1,TNFSF10
Neuregulin Signaling	0		0.0312	DCN,ITGA4,ITGA5
Neuroprotective Role of THOP1 in Alzheimer's Disease	0		0.0259	C1R,KLK12,SRY
Neurotrophin/TRK Signaling	0		0.0132	BDNF
Notch Signaling	0		0.027	HES7
Nur77 Signaling in T Lymphocytes	0		0.0294	PDK1,TNFSF10
OX40 Signaling Pathway	0		0.0111	MAPK12
PAK Signaling	0		0.0309	ITGA4,ITGA5,MAPK12
PD-1, PD-L1 cancer immunotherapy pathway	0		0.00943	CD274
PDGF Signaling	0		0.0233	INPP5D,INPP5F
PEDF Signaling	0		0.0366	BDNF,MAPK11,MAPK12
PFKFB4 Signaling Pathway	0		0.0217	PFKFB4
PKCŒ∏ Signaling in T Lymphocytes	0		0.00645	CACNB3
PPAR Signaling	0		0.0192	IL1B,IL1RAP
Phototransduction Pathway	0		0.0377	GRK1,GUCY1A2
Prolactin Signaling	0		0.0247	NMI,SOCS2
Protein Ubiquitination Pathway	0		0.00733	CRYAB,SMO
RANK Signaling in Osteoclasts	0		0.0341	MAPK11,MAPK12,TNFRSF11A
Rac Signaling	0		0.0268	ITGA4,ITGA5,TIAM1
Regulation of Cellular Mechanics by Calpain Protease	0		0.0308	ITGA4,ITGA5
Regulation of IL-2 Expression in Activated and Anergic T Lymphocytes	0		0.0112	MAPK12
Regulation of eIF4 and p70S6K Signaling	0		0.0255	ITGA4,ITGA5,MAPK11,MAPK12
Renal Cell Carcinoma Signaling	0		0.0375	EGLN3,SLC2A1,VEGFA
RhoA Signaling	0		0.0163	ACTA2,MYLK2
Role of BRCA1 in DNA Damage Response	0		0.0125	CDKN1A
Role of CHK Proteins in Cell Cycle Checkpoint Control	0		0.0175	CDKN1A
Role of Cytokines in Mediating Communication between Immune Cells	0		0.037	IL1B,IL6
SAPK/JNK Signaling	0		0.0196	GNG2,MAPK12
SPINK1 General Cancer Pathway	0		0.029	IL6,MT1F
SPINK1 Pancreatic Cancer Pathway	0		0.0333	CPA1,KLK12
Superpathway of Methionine Degradation	0		0.027	CDO1
Systemic Lupus Erythematosus Signaling	0		0.0175	BDKRB2,IL1B,IL6,INPP5D
T Helper Cell Differentiation	0		0.0137	IL6
TNFR1 Signaling	0		0.02	TNFAIP3
TNFR2 Signaling	0		0.0333	TNFAIP3
Telomerase Signaling	0		0.00935	CDKN1A
Th1 Pathway	0		0.0248	CD274,IL6,ITGB2
Th17 Activation Pathway	0		0.033	BATF,IL1B,IL6
Thyroid Cancer Signaling	0		0.038	BDNF,LEF1,PDK1
Tight Junction Signaling	0		0.0357	ACTA2,CLDN18,CLDN5,CLDN8,SNAP25,TIAM1
UVA-Induced MAPK Signaling	0		0.0408	MAPK11,MAPK12,PLCB1,PLCH2
UVB-Induced MAPK Signaling	0		0.0385	MAPK11,MAPK12
UVC-Induced MAPK Signaling	0		0.0392	MAPK11,MAPK12
VEGF Family Ligand-Receptor Interactions	0		0.0357	FLT4,KDR,VEGFA
fMLP Signaling in Neutrophils	0		0.0172	GNG2,PLCB1
iCOS-iCOSL Signaling in T Helper Cells	0		0.00901	INPP5D
mTOR Signaling	0		0.019	DIRAS3,PLD6,PRR5L,VEGFA
nNOS Signaling in Skeletal Muscle Cells	0		0.0244	CACNB3
tRNA Charging	0		0.0256	MARS2
Tryptophan Degradation III (Eukaryotic)	0.205		0.0435	KYNU
Graft-versus-Host Disease Signaling	0.222		0.0417	IL1B,IL6
Stearate Biosynthesis I (Animals)	0.222		0.0417	ACSL5,SLC27A6
Putrescine Degradation III	0.229		0.0476	ALDH1A3
Actin Nucleation by ARP-WASP Complex	0.236		0.0417	DIRAS3,ITGA4,ITGA5
Melatonin Signaling	0.236		0.0417	PLCB1,PLCH2,RORB
FAT10 Cancer Signaling Pathway	0.24		0.0435	ACVR1C,IL6
Fatty Acid Œ±-oxidation	0.242		0.05	ALDH1A3
Growth Hormone Signaling	0.243		0.0423	IGFBP3,ONECUT1,SOCS2
Communication between Innate and Adaptive Immune Cells	0.244		0.0417	CCL15,CXCL10,IL1B,IL6
Œ±-Adrenergic Signaling	0.244		0.0417	ADCY2,ADCY4,ADRA2A,GNG2
iNOS Signaling	0.249		0.0444	MAPK11,MAPK12
FAK Signaling	0.251		0.0421	ACTA2,ITGA4,ITGA5,TNS1
Apelin Muscle Signaling Pathway	0.256		0.0526	APLN
Granzyme A Signaling	0.256		0.0526	H1-4
Oxidative Ethanol Degradation III	0.256		0.0526	ALDH1A3
CCR5 Signaling in Macrophages	0.257		0.0426	CACNB3,GNG2,MAPK11,MAPK12
Role of JAK1 and JAK3 in Œ≥c Cytokine Signaling	0.258		0.0435	FES,IRS4,SYK
Role of Macrophages, Fibroblasts and Endothelial Cells in Rheumatoid Arthritis	0.269		0.0417	FRZB,IL1B,IL1RAP,IL6,LEF1,PLCB1,PLCH2,SFRP4,SMO,VEGFA,WNT1,WNT11,WNT5A
Glucocorticoid Receptor Signaling	0.271		0.0417	ANXA1,AR,CDKN1A,CDKN1C,CXCL3,IL1B,IL6,KRT23,MAPK11,MAPK12,SCGB1A1,TAF9B,TAT,VIPR1
Purine Nucleotides Degradation II (Aerobic)	0.272		0.0556	NT5E
Prostate Cancer Signaling	0.278		0.044	AR,CDKN1A,LEF1,SRD5A1
Altered T Cell and B Cell Signaling in Rheumatoid Arthritis	0.285		0.0444	CXCL13,IL1B,IL6,SPP1
Histamine Degradation	0.289		0.0588	ALDH1A3
B Cell Activating Factor Signaling	0.29		0.0488	MAPK11,MAPK12
CD40 Signaling	0.291		0.0462	MAPK11,MAPK12,TNFAIP3
April Mediated Signaling	0.313		0.0513	MAPK11,MAPK12
Inhibition of Matrix Metalloproteases	0.313		0.0513	MMP10,MMP23B
IL-12 Signaling and Production in Macrophages	0.326		0.0455	APOA2,APOB,APOD,MAPK11,MAPK12,SAA4
Adenosine Nucleotides Degradation II	0.327		0.0667	NT5E
Superpathway of Citrulline Metabolism	0.327		0.0667	CPS1
FGF Signaling	0.333		0.0476	FGF11,FGF9,MAPK11,MAPK12
Retinoic acid Mediated Apoptosis Signaling	0.339		0.05	CRABP2,TNFRSF10C,TNFSF10
Interferon Signaling	0.352		0.0556	IFITM1,IFITM2
Cancer Drug Resistance By Drug Efflux	0.36		0.0517	ABCC2,ABCG2,PDK1
MSP-RON Signaling Pathway	0.36		0.0517	ACTA2,ITGB2,KLK12
Chemokine Signaling	0.369		0.05	CCR3,MAPK11,MAPK12,PLCB1
Role of MAPK Signaling in the Pathogenesis of Influenza	0.369		0.05	CXCL10,MAPK11,MAPK12,PLAAT2
NAD Phosphorylation and Dephosphorylation	0.372		0.0769	ACP5
Urate Biosynthesis/Inosine 5'-phosphate Degradation	0.372		0.0769	NT5E
Th1 and Th2 Activation Pathway	0.378		0.0468	ACVR1C,CCR1,CCR3,CD274,CXCR6,HAVCR1,IL6,ITGB2
Role of JAK2 in Hormone-like Cytokine Signaling	0.381		0.0588	IRS4,SOCS2
Glycogen Degradation II	0.398		0.0833	TYMP
Guanosine Nucleotides Degradation III	0.398		0.0833	NT5E
Toll-like Receptor Signaling	0.409		0.0526	IL1B,MAPK11,MAPK12,TNFAIP3
4-1BB Signaling in T Lymphocytes	0.413		0.0625	MAPK11,MAPK12
Ethanol Degradation II	0.413		0.0625	ADH1C,ALDH1A3
Fatty Acid Œ≤-oxidation I	0.413		0.0625	ACSL5,SLC27A6
p53 Signaling	0.413		0.051	CCND2,CDKN1A,RRM2B,SNAI2,WT1
FcŒ≥RIIB Signaling in B Lymphocytes	0.42		0.0533	CACNB3,INPP5D,MAPK12,SYK
Type II Diabetes Mellitus Signaling	0.422		0.0493	ACSL5,CACNB3,IRS4,MAPK12,SLC27A6,SLC2A2,SOCS2
Ketogenesis	0.428		0.0909	HMGCLL1
Purine Nucleotides De Novo Biosynthesis II	0.428		0.0909	ADSS1
Œ≥-glutamyl Cycle	0.428		0.0909	GGT2/LOC102724197
Renin-Angiotensin Signaling	0.434		0.0508	ADCY2,ADCY4,AGTR1,MAPK11,MAPK12,SHF
Molecular Mechanisms of Cancer	0.439		0.046	ADCY2,ADCY4,BMP5,CCND2,CDKN1A,CTNNA2,DIRAS3,GNA15,ITGA4,ITGA5,LEF1,MAPK11,MAPK12,PLCB1,SMO,WNT1,WNT11,WNT5A
Iron homeostasis signaling pathway	0.463		0.0511	ATP6V0A4,ATP6V1B1,ATP6V1G2,BMP5,CP,IL6,TF
Sonic Hedgehog Signaling	0.467		0.069	GLI3,SMO
Leucine Degradation I	0.498		0.111	HMGCLL1
Triacylglycerol Degradation	0.507		0.0638	LIPG,PLA1A,PNLIPRP3
Role of Oct4 in Mammalian Embryonic Stem Cell Pluripotency	0.524		0.0652	NR5A1,POU5F1,SPP1
Eicosanoid Signaling	0.531		0.0606	AKR1C3,ALOX15B,ALOX5,PLAAT2
Virus Entry via Endocytic Pathways	0.543		0.0561	ACTA2,FLNC,ITGA4,ITGA5,ITGB2,ITGB7
Germ Cell-Sertoli Cell Junction Signaling	0.548		0.0526	ACTA2,CDH2,CTNNA2,DIRAS3,MAPK12,TUBA3E,TUBB1,TUBB2B,TUBB8
Tryptophan Degradation X (Mammalian, via Tryptamine)	0.554		0.08	AKR1B10,ALDH1A3
Regulation of the Epithelial-Mesenchymal Transition Pathway	0.555		0.0521	CDH2,FGF11,FGF9,LEF1,LOX,SMO,SNAI2,WNT1,WNT11,WNT5A
Apelin Pancreas Signaling Pathway	0.558		0.0682	APLN,MAPK12,PDE3B
Pyrimidine Ribonucleotides De Novo Biosynthesis	0.558		0.0682	AK1,AK5,ENTPD2
Glutathione Redox Reactions I	0.579		0.0833	CLIC2,GPX2
IL-22 Signaling	0.579		0.0833	MAPK11,MAPK12
Glycoaminoglycan-protein Linkage Region Biosynthesis	0.589		0.143	B3GAT1
NAD Salvage Pathway III	0.589		0.143	NMNAT2
Phosphatidylcholine Biosynthesis I	0.589		0.143	PCYT1B
Pyrimidine Ribonucleotides Interconversion	0.596		0.0714	AK1,AK5,ENTPD2
Differential Regulation of Cytokine Production in Intestinal Epithelial Cells by IL-17A and IL-17F	0.606		0.087	IL1B,LCN2
Ethanol Degradation IV	0.606		0.087	ALDH1A3,CYGB
Hepatic Cholestasis	0.615		0.0541	ABCC2,ADCY2,ADCY4,CD70,IL1B,IL1RAP,IL6,MAPK12,SLCO1A2,TNFSF10
IL-17 Signaling	0.62		0.0625	CRP,CXCL10,IL6,MAPK11,MAPK12
Semaphorin Signaling in Neurons	0.621		0.0667	DIRAS3,DPYSL3,FES,SEMA3A
Role of NANOG in Mammalian Embryonic Stem Cell Pluripotency	0.644		0.0588	BMP5,POU5F1,SMO,WNT1,WNT11,WNT5A,ZFP42
Ceramide Biosynthesis	0.648		0.167	DEGS2
NAD Biosynthesis III	0.648		0.167	NMNAT2
NAD Biosynthesis from 2-amino-3-carboxymuconate Semialdehyde	0.648		0.167	NMNAT2
Pyruvate Fermentation to Lactate	0.648		0.167	LDHA
Serotonin and Melatonin Biosynthesis	0.648		0.167	TPH1
Tryptophan Degradation to 2-amino-3-carboxymuconate Semialdehyde	0.648		0.167	KYNU
Urea Cycle	0.648		0.167	CPS1
Ovarian Cancer Signaling	0.652		0.0576	FGF9,GJA1,LEF1,SMO,VEGFA,WNT1,WNT11,WNT5A
Bladder Cancer Signaling	0.664		0.0619	CDKN1A,FGF11,FGF9,MMP10,MMP23B,VEGFA
Role of Tissue Factor in Cancer	0.668		0.0598	GNA15,IL1B,MAPK11,MAPK12,PLAUR,PLCB1,VEGFA
Glutamate Receptor Signaling	0.673		0.0702	GNG2,GRID2,GRM4,SLC1A6
Inflammasome pathway	0.696		0.1	CASP1,IL1B
The Visual Cycle	0.696		0.1	AKR1B10,AKR1C3
Complement System	0.702		0.0811	C1R,C4BPB,ITGB2
Creatine-phosphate Biosynthesis	0.718		0.2	CKB
Myo-inositol Biosynthesis	0.718		0.2	INPP5F
Role of IL-17A in Arthritis	0.729		0.0741	CXCL3,CXCL6,MAPK11,MAPK12
Transcriptional Regulatory Network in Embryonic Stem Cells	0.729		0.0741	FOXC1,H4C8,ONECUT1,POU5F1
GADD45 Signaling	0.73		0.105	CCND2,CDKN1A
Noradrenaline and Adrenaline Degradation	0.752		0.0857	ADH1C,ALDH1A3,PNMT
Differential Regulation of Cytokine Production in Macrophages and T Helper Cells by IL-17A and IL-17F	0.767		0.111	IL1B,IL6
Ascorbate Recycling (Cytosolic)	0.806		0.25	GLRX
Catecholamine Biosynthesis	0.806		0.25	PNMT
Glutathione Redox Reactions II	0.806		0.25	GLRX
L-cysteine Degradation I	0.806		0.25	CDO1
D-myo-inositol (1,4,5)-trisphosphate Degradation	0.807		0.118	INPP5D,INPP5F
Dermatan Sulfate Degradation (Metazoa)	0.807		0.118	HYAL1,HYAL4
Mitochondrial L-carnitine Shuttle Pathway	0.807		0.118	ACSL5,SLC27A6
Œ≥-linolenate Biosynthesis II (Animals)	0.807		0.118	ACSL5,SLC27A6
Phagosome Formation	0.823		0.064	DIRAS3,ITGA4,ITGA5,ITGB2,PLCB1,PLCH2,SCARA3,SYK
Androgen Biosynthesis	0.85		0.125	AKR1C3,SRD5A1
Chondroitin Sulfate Degradation (Metazoa)	0.85		0.125	HYAL1,HYAL4
Extrinsic Prothrombin Activation Pathway	0.85		0.125	F5,PROC
Parkinson's Signaling	0.85		0.125	MAPK11,MAPK12
G Protein Signaling Mediated by Tubby	0.864		0.0968	GNG2,PLCB1,TUB
Choline Biosynthesis III	0.896		0.133	PCYT1B,PLD6
Histidine Degradation VI	0.896		0.133	AMDHD1,HAL
Methylglyoxal Degradation I	0.922		0.333	HAGHL
Thyroid Hormone Biosynthesis	0.922		0.333	IYD
Thyroid Hormone Metabolism I (via Deiodination)	0.922		0.333	DIO2
Thyronamine and Iodothyronamine Metabolism	0.922		0.333	DIO2
Glycogen Degradation III	0.946		0.143	MGAM,TYMP
Leukotriene Biosynthesis	0.946		0.143	ALOX5,GGT2/LOC102724197
RAR Activation	0.952		0.0619	ADCY2,ADCY4,ADH1C,AKR1B10,AKR1C3,ALDH1A3,CRABP2,IGFBP3,MAPK11,MAPK12,SORBS3,VEGFA
Human Embryonic Stem Cell Pluripotency	0.956		0.0667	BDNF,BMP5,LEF1,LEFTY1,POU5F1,SMO,WNT1,WNT11,WNT5A
Clathrin-mediated Endocytosis Signaling	0.964		0.0622	ACTA2,APOA2,APOB,APOD,FGF11,FGF9,ITGA5,ITGB2,ITGB7,SAA4,TF,VEGFA
Epithelial Adherens Junction Signaling	0.988		0.0658	ACTA2,ACVR1C,CDH2,CTNNA2,LEF1,SNAI2,TUBA3E,TUBB1,TUBB2B,TUBB8
Role of Hypercytokinemia/hyperchemokinemia in the Pathogenesis of Influenza	0.989		0.093	CCR1,CXCL10,IL1B,IL6
Antiproliferative Role of Somatostatin Receptor 2	0.995		0.0779	CDKN1A,GNG2,GUCY1A2,NPR1,NPR3,SSTR2
Bile Acid Biosynthesis, Neutral Pathway	1		0.154	AKR1C1/AKR1C2,AKR1C3
Fatty Acid Activation	1		0.154	ACSL5,SLC27A6
Oleate Biosynthesis II (Animals)	1		0.154	SCD,SCD5
Phagosome Maturation	1		0.0662	ATP6V0A4,ATP6V1B1,ATP6V1G2,CTSF,CTSV,SNAP25,TUBA3E,TUBB1,TUBB2B,TUBB8
Retinol Biosynthesis	1.02		0.0952	AKR1B10,AKR1C3,LIPG,PNLIPRP3
Role of IL-17F in Allergic Inflammatory Airway Diseases	1.02		0.0952	CXCL10,CXCL6,IL1B,IL6
Gluconeogenesis I	1.04		0.115	ALDOB,ALDOC,ENO2
Glycolysis I	1.04		0.115	ALDOB,ALDOC,ENO2
NAD Salvage Pathway II	1.04		0.115	ACP5,NMNAT2,NT5E
Leptin Signaling in Obesity	1.06		0.0811	ADCY2,ADCY4,PDE3A,PDE3B,PLCB1,PLCH2
NAD biosynthesis II (from tryptophan)	1.06		0.167	KYNU,NMNAT2
IL-1 Signaling	1.07		0.0769	ADCY2,ADCY4,GNA15,GNG2,IL1RAP,MAPK11,MAPK12
IL-17A Signaling in Gastric Cells	1.08		0.12	CXCL10,MAPK11,MAPK12
Role of JAK family kinases in IL-6-type Cytokine Signaling	1.08		0.12	IL6,MAPK11,MAPK12
Taurine Biosynthesis	1.09		0.5	CDO1
Vitamin-C Transport	1.12		0.125	GLRX,SLC2A1,SLC2A3
Apelin Cardiac Fibroblast Signaling Pathway	1.16		0.13	AGTR1,APLN,IL6
Superpathway of D-myo-inositol (1,4,5)-trisphosphate Metabolism	1.16		0.13	INPP5D,INPP5F,ITPKA
IL-10 Signaling	1.17		0.087	CCR1,IL1B,IL1RAP,IL6,MAPK11,MAPK12
Remodeling of Epithelial Adherens Junctions	1.2		0.0882	ACTA2,CTNNA2,TUBA3E,TUBB1,TUBB2B,TUBB8
Embryonic Stem Cell Differentiation into Cardiac Lineages	1.21		0.2	POU5F1,SP4
Pyrimidine Deoxyribonucleotides De Novo Biosynthesis I	1.21		0.136	AK1,AK5,RRM2B
Gustation Pathway	1.24		0.0714	ADCY2,ADCY4,CACNB3,ENPP6,GNG2,PDE10A,PDE3A,PDE3B,PDE4B,PDE8B,PLD6
IL-17A Signaling in Fibroblasts	1.25		0.114	IL6,LCN2,MAPK11,MAPK12
Pathogenesis of Multiple Sclerosis	1.29		0.222	CCR1,CXCL10
Sucrose Degradation V (Mammalian)	1.29		0.222	ALDOB,ALDOC
Cardiomyocyte Differentiation via BMP Receptors	1.32		0.15	BMP5,MEF2C,NPPB
Cellular Effects of Sildenafil (Viagra)	1.33		0.0763	ACTA2,ADCY2,ADCY4,GUCY1A2,KCNQ2,PDE3A,PDE3B,PDE4B,PLCB1,PLCH2
GABA Receptor Signaling	1.35		0.0842	ADCY2,ADCY4,CACNB3,GABRB2,GABRR1,KCNQ2,SLC6A1,SLC6A13
Methylglyoxal Degradation III	1.37		0.158	AKR1B10,AKR1C1/AKR1C2,AKR1C3
4-hydroxybenzoate Biosynthesis	1.38		1	TAT
4-hydroxyphenylpyruvate Biosynthesis	1.38		1	TAT
Thio-molybdenum Cofactor Biosynthesis	1.38		1	MOCOS
Histidine Degradation III	1.39		0.25	AMDHD1,HAL
Salvage Pathways of Pyrimidine Deoxyribonucleotides	1.39		0.25	CDA,TYMP
Superoxide Radicals Degradation	1.39		0.25	CYGB,NQO1
1D-myo-inositol Hexakisphosphate Biosynthesis II (Mammalian)	1.43		0.167	INPP5D,INPP5F,ITPKA
D-myo-inositol (1,3,4)-trisphosphate Biosynthesis	1.43		0.167	INPP5D,INPP5F,ITPKA
Serotonin Receptor Signaling	1.49		0.116	ADCY2,ADCY4,HTR1E,HTR2C,TPH1
Glycine Cleavage Complex	1.63		0.333	GLDC,OCA2
Sertoli Cell-Sertoli Cell Junction Signaling	1.64		0.0757	ACTA2,CLDN18,CLDN5,CLDN8,CTNNA2,GUCY1A2,ITGA4,ITGA5,MAPK11,MAPK12,TUBA3E,TUBB1,TUBB2B,TUBB8
Tyrosine Degradation I	1.8		0.4	FAH,TAT
Role of IL-17A in Psoriasis	1.82		0.231	CXCL3,CXCL6,S100A9
Inhibition of Angiogenesis by TSP1	1.9		0.147	GUCY1A2,KDR,MAPK11,MAPK12,VEGFA
Maturity Onset Diabetes of Young (MODY) Signaling	1.96		0.119	ALDOB,APOA2,APOB,APOD,KLF11,ONECUT1,SLC2A2
Role of Osteoblasts, Osteoclasts and Chondrocytes in Rheumatoid Arthritis	1.97		0.0773	ACP5,ADAMTS5,BMP5,FRZB,IL1B,IL1RAP,IL6,ITGA5,LEF1,MAPK12,SFRP4,SMO,SPP1,TNFRSF11A,WNT1,WNT11,WNT5A
Caveolar-mediated Endocytosis Signaling	1.97		0.11	ACTA2,FLNC,ITGA4,ITGA5,ITGA8,ITGA9,ITGB2,ITGB7
Airway Pathology in Chronic Obstructive Pulmonary Disease	1.99		0.0932	APOD,CD70,CXCL3,FGF11,FGF9,IL1B,IL6,LCN15,LCN2,PAEP,TNFSF10
Gap Junction Signaling	2.06		0.0808	ACTA2,ADCY2,ADCY4,GJA1,GJA5,GJC1,GUCY1A2,HTR2C,NPR1,NPR3,PLCB1,PLCH2,TUBA3E,TUBB1,TUBB2B,TUBB8
TR/RXR Activation	2.09		0.107	AKR1C1/AKR1C2,AKR1C3,DIO2,NRGN,NXPH2,PDE3B,SLC16A3,SLC2A1,SYT2
PXR/RXR Activation	2.27		0.123	ABCC2,CYP1A2,CYP2A6 (includes others),CYP2B6,GSTA2,IL6,SCD,UGT1A1
Hepatic Fibrosis / Hepatic Stellate Cell Activation	2.69		0.0914	ACTA2,AGTR1,COL16A1,COL19A1,COL2A1,COL3A1,COL5A1,COL8A1,COL9A2,CXCL3,FLT4,IGFBP3,IL1B,IL1RAP,IL6,KDR,VEGFA
Atherosclerosis Signaling	3.08		0.11	ALOX15B,ALOX5,APOA2,APOB,APOD,CCR3,COL2A1,COL3A1,IL1B,IL6,ITGA4,ITGB2,PLAAT2,SAA4
FXR/RXR Activation	3.11		0.111	A1BG,ABCC2,APOA2,APOB,APOD,IL1B,MAPK12,PLTP,PON3,SAA1,SAA2,SAA4,SLC51B,TF
Breast Cancer Regulation by Stathmin1	3.26		0.0711	ADGRD1,ADGRF1,ADGRG2,ADGRL3,ADGRL4,ADRA1B,ADRA2A,AGTR1,AVPR1A,BDKRB2,CCND2,CCR1,CCR3,CCRL2,CHRM2,CHRM3,CNR1,CXCR6,GALR1,GNG2,GPR158,GPR161,GPR171,GPR173,GPRC5B,GRM4,HTR1E,HTR2C,KISS1R,MC4R,OPRK1,PLCB1,PTH1R,SMO,SSTR2,TACR1,TUBA3E,TUBB1,TUBB2B,TUBB8,VEGFA,VIPR1
Granulocyte Adhesion and Diapedesis	3.27		0.1	CCL15,CCL28,CLDN18,CLDN5,CLDN8,CXCL10,CXCL13,CXCL2,CXCL3,CXCL6,IL1B,IL1RAP,ITGA4,ITGA5,ITGB2,MMP10,MMP23B,XCL1
Agranulocyte Adhesion and Diapedesis	3.33		0.0984	ACTA2,CCL15,CCL28,CLDN18,CLDN5,CLDN8,CXCL10,CXCL13,CXCL2,CXCL3,CXCL6,IL1B,ITGA4,ITGA5,ITGB2,ITGB7,MMP10,MMP23B,XCL1
Xenobiotic Metabolism Signaling	3.75		0.0906	ABCC2,AHRR,ALDH1A3,CHST11,CHST2,CHST4,CYP1A1,CYP1A2,CYP1B1,CYP2B6,GSTA2,HS3ST6,IL1B,IL6,MAPK11,MAPK12,NQO1,SULT1A1,SULT1A2,SULT1A3/SULT1A4,SULT1C4,SULT1E1,UGT1A1,UGT1A3,UGT2B11,UGT8
G-Protein Coupled Receptor Signaling	4.54		0.0993	ADCY2,ADCY4,ADRA1B,ADRA2A,AGTR1,AVPR1A,CHRM2,CHRM3,CNR1,ENPP6,GNA15,GRM4,HTR1E,HTR2C,MC4R,NPR3,OPRK1,PDE10A,PDE3A,PDE3B,PDE4B,PDE8B,PLCB1,PLD6,PTH1R,RGS4,VIPR1
Axonal Guidance Signaling	5.57		0.0888	ABLIM3,ADAM2,ADAM23,ADAMDEC1,ADAMTS1,ADAMTS10,ADAMTS16,ADAMTS19,ADAMTS5,BDNF,BMP5,EPHA6,FES,GLI3,GNA15,GNG2,ITGA4,ITGA5,LINGO1,LRRC4C,MMP10,MMP23B,NTN1,NTNG1,PAPPA,PLCB1,PLCH2,ROBO2,SEMA3A,SEMA3D,SEMA6D,SLIT2,SMO,TUBA3E,TUBB1,TUBB2B,TUBB8,UNC5B,UNC5C,VEGFA,WNT1,WNT11,WNT5A

## Sheet: Upstream Regulators
Upstream Regulators for My Projects->20200928 Brad Johnson->mut vs wt d702factor 2x q05
Analysis	ID	Upstream Regulator	Expr Log Ratio	Molecule Type	Predicted Activation State	Activation z-score	Notes	Bias Term	Bias-corrected z-score	p-value of overlap	Target molecules in dataset	Mechanistic Network
mut vs wt d702factor 2x q05		HIF1A	0.205	transcription regulator	Inhibited	-3.545		-0.133	-2.724	9.74e-13	ACTA2,ADAMTS1,ALDOC,APLN,BGN,CA9,CD24,CD274,CD70,CDH2,CDKN1A,CEACAM5,CXCL2,CXCL3,CYP1A1,EGLN3,ENO2,ERO1A,GJA1,IGFBP3,IL1B,IL6,INHBB,ITGA5,ITGB2,LDHA,LOX,LOXL2,MEF2C,MNX1,NDRG1,NEFL,NEUROG3,NT5E,P4HA1,PDK1,PFKFB4,PLAUR,PLOD2,POU5F1,PPFIA4,PTK6,SLC16A3,SLC2A1,SLC2A3,SNAI2,SPAG4,SRD5A1,STC2,TAF9B,TMEM45A,VEGFA,VIM,WNT1,WT1	AR,CTNNB1,EPAS1,HIF1A,Hif1,JUN,MYC,NFkB (complex),PKM,PPARG,RELA,RXRA,SMAD2,SP1,SREBF1,STAT1,STAT3,TP53,VHL
mut vs wt d702factor 2x q05		cobalt chloride		chemical reagent	Inhibited	-3.238		-0.134	-2.703	7.64e-08	ACTA2,ADAMTS1,BDNF,CA9,CD274,CDKN1A,CP,CYP1A1,CYP1B1,DELEC1,MIAT,NDRG1,PLAUR,RGS5,SLC2A1,VEGFA,WT1	AHR,AR,ARNT,Akt,Creb,EGR1,FOXO1,HDAC1,HIF1A,HMOX1,Hif1,JUN,MYC,NFE2L2,NFKB1,NFkB (complex),PPARG,RELA,SMAD3,SP1,STAT1,STAT3,TP53,VHL,cobalt chloride
mut vs wt d702factor 2x q05		BSG	0.229	transporter	Inhibited	-3.19		-0.1	-2.827	1.77e-08	ABCC2,ABCG2,ALDOB,CDH2,CRP,CXCL3,CXCL6,CYP1A2,IL1B,IL6,KDR,PLAUR,VEGFA,VIM	BSG,CEBPB,CTNNB1,CTSB,IL6,JUN,NFKB1,NFKBIA,NFkB (complex),PLAU,RAC1,RELA,SMAD3,SP1,STAT1,STAT3,STAT4,TNF,TP53
mut vs wt d702factor 2x q05		FOXM1	-0.671	transcription regulator	Inhibited	-2.989		-0.171	-2.314	1.88e-06	ANXA1,AR,CCND2,CDH2,CDKN1A,CENPF,CRP,H2BC8,IL6,KDR,LDHA,LEF1,LOX,MYCN,NES,PLAUR,POU5F1,SNAI2,VEGFA,VIM	Akt,CTNNB1,EGR1,FOXM1,FOXO1,HDAC1,JUN,MET,MYC,NFKB1,NFKBIA,NFkB (complex),SMAD3,SMAD4,SP1,STAT1,STAT3,TCF,TP53
mut vs wt d702factor 2x q05		EGF	0.506	growth factor	Inhibited	-2.958		-0.124	-2.143	2.18e-08	ABCG2,AR,ARTN,CASP1,CCND2,CD274,CDKN1A,CLDN8,COL3A1,CXCL13,CXCL2,CXCL6,CYP1A1,CYP2B6,DCN,DIO2,FST,FSTL1,GJA1,HPGD,IGFBP3,IL1B,IL6,LCN2,LDHA,MAPK11,MMP10,MNX1,MYCN,NES,NEUROG3,NR5A1,PDE3A,PDK4,PDPN,PLAUR,POU5F1,S100A9,SCD,SCGB1A1,SERPINB2,SLC9A2,SNAI2,SNAP25,SP4,SPP1,TF,TFAP2A,TNC,TNFAIP3,VDR,VEGFA,VIM	CEBPB,CTNNB1,Ca2+,Creb,EGF,FOS,HGF,IL6,JUN,JUND,MYC,NFKB1,NFKBIA,NFkB (complex),RELA,SP1,STAT1,STAT3,TP53
mut vs wt d702factor 2x q05		lysophosphatidylinositol		chemical - endogenous mammalian	Inhibited	-2.828		-0.196	-2.275	0.000879	CASP1,CD274,CNR1,CXCL3,CXCL6,IL1B,LDHA,STC1	CEBPB,Creb,EGR1,ERK1/2,FOS,JUN,NFKB1,NFkB (complex),P38 MAPK,SP1,STAT3,ZFP36,lysophosphatidylinositol
mut vs wt d702factor 2x q05		EPAS1	0.309	transcription regulator	Inhibited	-2.805		-0.15	-2.089	1.94e-13	ABCG2,ACP5,ALDOC,APLN,CA9,CD274,CDKN1A,CKB,CXCL2,EGLN3,ENO2,FLG,GJA1,IGFBP3,IL6,INHBB,KDR,LDHA,LOX,LOXL2,MYOM2,NDRG1,NEFL,NT5E,PFKFB4,PLOD2,POU5F1,PTK6,PTPRZ1,SLC2A1,SLC2A3,SLC6A8,SPAG4,STC2,TAF9B,TMEM45A,TNFAIP3,VEGFA,WNT1	CREBBP,CTNNB1,Creb,EGFR,EGR1,EP300,EPAS1,ERK1/2,FOS,FOXM1,HIF1A,Histone h3,JUN,KLF4,KMT2A,MED1,NFKB1,RELA,RNA polymerase II,SMAD4,SP1,STAT3,TCF,TP53
mut vs wt d702factor 2x q05		RAF1	-0.127	kinase	Inhibited	-2.799		-0.172	-1.973	1.99e-05	ANXA1,ATP6V1B1,CD37,CDKN1A,CHN1,CRP,CRYAB,CSTA,CXCL3,DIO2,EMP3,FGFBP1,IGFBP3,IL1B,IL6,LDHA,MT1F,NQO1,PLAUR,PRDM1,SERPINB2,TIAM1,TSPOAP1,VEGFA	AHR,CEBPB,FOS,GLI2,JUN,JUND,MAP2K1,MAPK8,MYC,NFKB1,NFKBIA,NFkB (complex),P38 MAPK,RAF1,RELA,SMAD3,SP1,STAT3,TP53,ZFP36
mut vs wt d702factor 2x q05		Insulin		group	Inhibited	-2.749		-0.053	-2.508	0.0287	AGTR1,ALDOB,APLN,CDKN1A,CHRM3,COL3A1,COL5A1,CRABP2,CYP1A1,CYP1A2,ERO1A,FBXO32,IGFBP3,IL13RA2,IL6,LDHA,NPR1,PCSK9,PDK1,PDK4,PLCB1,SCD,SLC15A1,SLC2A1,SLC2A2,SLC2A3,SRD5A1,TAT,TNC,VEGFA
mut vs wt d702factor 2x q05		Vegf		group	Inhibited	-2.739		-0.144	-1.86	0.000155	ACTA2,ADAMTS1,ANGPTL2,APLN,CASP1,CENPF,CRYAB,CXCL10,DOK5,FLT4,FST,GPRC5B,HOPX,IGFBP3,IL6,INHBB,KDR,KIF15,LCN2,LEF1,LRP2,MEF2C,MMP10,MYCN,NID2,NPL,PLAUR,PLOD2,PTPRR,RGCC,SERPINB2,SOCS2,STC1,TACR1,TNC,TNFRSF10C,TNFRSF11A,TSHZ1,VEGFA,VIM	CEBPB,CTNNB1,Creb,EGR1,FOXO1,FOXO3,GLI2,HIF1A,JUN,MAP2K1,MAPK14,MYC,NFKB1,NFkB (complex),SMAD3,SMAD4,SP1,STAT3,TGFB1,TP53,TP73,VEGFA,Vegf
mut vs wt d702factor 2x q05		STAT4	0.08	transcription regulator	Inhibited	-2.726		-0.196	-1.8	0.0001	ALDOC,CXCL10,CXCL2,CXCL3,ENO2,ERO1A,GJA1,H2AC18/H2AC19,IL6,NDRG1,PDK1,PLOD2,PRDM1,PRDM16,RAMP2,RCN3,RGCC,SLC2A3,STC2,TSPAN5,TUBB2B,VEGFA,VSIR	CTNNB1,FOXP3,GATA3,HIF1A,IL17A,IL4,JUN,MYC,NFKBIA,NFkB (complex),RELA,RORC,RUNX3,SMAD3,SMAD4,SP1,STAT1,STAT3,STAT4,TP53
mut vs wt d702factor 2x q05		mycophenolic acid		chemical drug	Inhibited	-2.714		-0.125	-2.299	0.000252	ACTA2,CCND2,CD274,CDKN1A,CXCL3,CXCL6,IL1B,IL6,MGAM,RGS4,SERPINB2,TNFAIP3	AHR,ALB,CEBPB,FAS,FOS,HIF1A,JUN,JUND,MYC,NFKB1,NFKBIA,NFkB (complex),P38 MAPK,RELA,SMAD3,SP1,SQSTM1,STAT3,TP53,ZFP36,mycophenolic acid
mut vs wt d702factor 2x q05		F2	0.595	peptidase	Inhibited	-2.63		-0.176	-1.828	0.00278	ACTA2,CASP1,CCND2,CDKN1A,CXCL10,CXCL13,CXCL3,CYP2B6,DOK5,IL1B,IL6,KDR,LOXL2,MMP10,NCOA7,PLAUR,SLC2A3,SLIT2,TNFAIP3,TNFSF10,TNNT2,VEGFA	CCN1,CEBPB,CTNNB1,F2,JUN,MYC,NFKB1,NFKBIA,NFkB (complex),PPARG,RELA,STAT1,STAT3,lipopolysaccharide
mut vs wt d702factor 2x q05		CD44	0.001	other	Inhibited	-2.616		-0.142	-2.06	9.83e-05	ABCG2,ACTA2,BGN,CCND2,CD274,CDKN1A,COL3A1,CRABP2,CXCL6,IFITM2,IL1B,IL6,ITGA4,ITGA5,PARVB,POU5F1,SPP1,TIAM1,TNFRSF11A,VIM,WNT5A,XCL1	AHR,CD44,CEBPB,CTNNB1,FGF2,FN1,IL10,JUN,MYC,NFKB1,NFKBIA,NFkB (complex),P38 MAPK,RELA,SMAD3,SMAD4,SMAD7,SP1,STAT3,ZFP36
mut vs wt d702factor 2x q05		ZEB1	1.264	transcription regulator	Inhibited	-2.605		0.009	-2.628	0.0206	COL3A1,IL1B,LOX,LOXL2,PTPRZ1,SFTPC,TF,VIM
mut vs wt d702factor 2x q05		E. coli B4 lipopolysaccharide		chemical toxicant	Inhibited	-2.603		-0.127	-2.044	0.0109	ADAMTS5,ANXA1,CD274,CD70,CXCL10,CXCL2,CXCL3,CXCL6,F5,GPNMB,IL1B,IL6,INPP5D,LCN2,PDE3A,PLAUR,STC2,TF,TNFAIP3,TNFSF10,TRPM3
mut vs wt d702factor 2x q05		tributyrin		chemical drug	Inhibited	-2.595		-0.183	-2.022	0.000403	CD274,CDKN1A,CXCL3,CXCL6,IL1B,IL6,NDRG1,RGS4,SERPINB2,TNFAIP3	AR,CTNNB1,HDAC1,HDAC3,HDAC4,HIC1,HIF1A,Hif1,MEF2C,NFKB1,NFkB (complex),PPARG,RELA,SP1,THRB,TP53,WDR5,tributyrin
mut vs wt d702factor 2x q05		ATP		chemical - endogenous mammalian	Inhibited	-2.589		-0.11	-2.253	0.0101	BDNF,CASP1,CD200,CXCL10,CXCL2,CXCL3,IL1B,IL6,ITGA4,LCN2,SYT4
mut vs wt d702factor 2x q05		Hif1		complex	Inhibited	-2.584		-0.181	-1.942	2.96e-06	ADRA1B,APLN,CA9,CD24,CDKN1A,CP,INHA,LDHA,LOXL2,PDK1,SLC16A3,SLC2A1,TF,VEGFA
mut vs wt d702factor 2x q05		MAP3K14	-0.552	kinase	Inhibited	-2.578		-0.142	-2.134	0.00229	ACTA2,BST1,CXCL2,IL1B,IL6,PDE3B,SIX1,SIX2,TNFAIP3,TNFSF10	AHR,CEBPB,IKBKG,MAP3K14,NFKB1,NFKBIA,NFkB (complex),RELA,SMAD3,STAT1,STAT3,TP53,TRAF3
mut vs wt d702factor 2x q05		KMT2D	-0.146	transcription regulator	Inhibited	-2.55		-0.147	-1.9	0.000395	ADGRG2,ARTN,B3GNT6,CNTLN,DSC2,EBF4,FAH,HFM1,HOPX,IVL,KRT23,LOXL1,MYOM3,NKAPL,NPR3,NT5E,RAB42,SLC1A6,SMO,TNNT2
mut vs wt d702factor 2x q05		SOCS6	-0.189	other	Inhibited	-2.449		-0.047	-2.335	0.000185	CXCL2,CXCL3,IL1B,PLA1A,RGCC,SLA	CEBPB,JUN,NFkB (complex),P38 MAPK,SOCS6,STAT3,ZFP36
mut vs wt d702factor 2x q05		miR-199a-5p (and other miRNAs w/seed CCAGUGU)		mature microrna	Inhibited	-2.449		0.191	-2.916	0.1	BGN,CDKN1A,DCN,KLF2,LCN2,MX2
mut vs wt d702factor 2x q05		HSPA9	0.295	other	Inhibited	-2.433		-0.117	-2.147	0.00158	CDKN1A,CLMN,CRABP2,MMP10,MYCN,PRDM16,VIM	CTNNB1,EP300,HDAC1,HSPA9,JUN,MYC,NCOA2,PPARG,RARA,RARB,RELA,RNA polymerase II,RXRA,TERT,THRB
mut vs wt d702factor 2x q05		TEAD1	-0.068	transcription regulator	Inhibited	-2.433		-0.144	-2.082	0.0335	ACTA2,AK5,CDKN1A,COL3A1,LOXL1,PCDH18,TNNT2
mut vs wt d702factor 2x q05		SPIB	-1.095	transcription regulator	Inhibited	-2.414		-0.158	-2.034	0.0671	CD200,COL2A1,GNA15,KDR,MEF2C,PRDM1,TENM4
mut vs wt d702factor 2x q05		Collagen type I (complex)		complex	Inhibited	-2.395		-0.106	-2.14	0.00817	ACTA2,CDH2,IL6,KDR,MMP10,PLOD2,TNC,VIM	CTNNB1,Collagen type I (complex),Creb,EGR1,FN1,FOXM1,FOXO3,HIF1A,ITGB1,JUN,NFKB1,NFkB (complex),PLAU,RELA,SMAD3,SMAD4,SP1,STAT1,STAT3,STAT4,TCF,VEGFA
mut vs wt d702factor 2x q05		CD38	-0.336	enzyme	Inhibited	-2.386		-0.176	-1.649	5.9e-05	ACTA2,ALDOC,CCND2,EGLN3,ERO1A,GLIPR2,IL6,ITGB7,NDRG1,NT5E,P4HA1,PCP4,PDK1,PRDM1,SLC16A3,SLC2A1,SOCS2,TUBB2B,VIM	AKT1,Akt,CD38,CEBPB,EGR1,ERK,FOXO1,FOXO3,IFNG,JUN,NFKB1,NFKBIA,NFkB (complex),PPARG,RELA,SMAD3,SP1,STAT1,STAT3,TP53
mut vs wt d702factor 2x q05		TRAF6	-0.159	enzyme	Inhibited	-2.378		-0.167	-1.981	0.0293	CD274,CRP,CXCL13,CXCL2,IL1B,IL6,TNFAIP3
mut vs wt d702factor 2x q05		phorbol esters		chemical - other	Inhibited	-2.356		-0.143	-1.933	0.0155	ANXA1,CDH2,CXCL6,IL1B,IL6,IVL,MMP10,TNFSF10,VDR
mut vs wt d702factor 2x q05		IL1B	-1.241	cytokine	Inhibited	-2.341		-0.075	-1.718	1.75e-12	A4GALT,ABCC2,ABCG2,ACTA2,ADAMTS1,ADAMTS5,AGTR1,ANKH,ANXA1,APCS,APOB,AVPR1A,BGN,C1R,CCL28,CCR1,CCRL2,CD274,CDH2,CDKN1A,COL2A1,CP,CRP,CRYAB,CTSF,CXCL10,CXCL13,CXCL2,CXCL3,CXCL6,CYP1A1,CYP1A2,CYP2B6,DCN,EGLN3,ENPP1,FST,GAS6,GBP6,GJA1,GSTA2,H19,IGFBP3,IGFBP6,IL1B,IL1RAP,IL6,ITGA5,KCNH8,KDR,KIF15,LCN2,LDHA,LINC02432,LOX,MEF2C,MFAP2,MMP10,NMI,NQO1,NR2F2-AS1,PAPPA,PCSK1,PDE4B,PDK1,PRDM1,PTX3,RAB3C,S100A…	AHR,CEBPB,IFNG,IL1A,IL1B,IL6,JUN,NFKB1,NFKBIA,NFkB (complex),RELA,SMAD3,STAT1,STAT3,TNF
mut vs wt d702factor 2x q05		RET	-0.047	kinase	Inhibited	-2.335		-0.12	-1.923	1.32e-06	ANXA1,CLDN5,CRYAB,CTSV,DCN,GJA1,GRP,IL1B,IL6,INSM1,LOX,MMP10,PLAUR,PLOD2,PTN,S100A9,SCARA3,STC1,TNC,TNNT2,WNT11	CTNNB1,Creb,EGR1,ERK1/2,FOS,JUN,JUND,MYC,NFKB1,NFKBIA,NFkB (complex),RAC1,RELA,RET,SP1,STAT1,STAT3,TP53
mut vs wt d702factor 2x q05		CAV1	-0.651	transmembrane receptor	Inhibited	-2.316		-0.054	-2.169	0.0205	ADGRG2,CDKN1A,CLDN8,IL6,INHBB,KDR,NQO1,POU5F1,SLC2A3,SNAI2,VIM,ZFP42
mut vs wt d702factor 2x q05		ARNT2	-0.85	transcription regulator	Inhibited	-2.309		-0.196	-1.631	0.175	BST1,CCR1,NR5A1,PDLIM4,PLCB1,POU5F1,SEMA5B,SERPINA5,SIM1,SLC2A1,SLC2A3,VEGFA
mut vs wt d702factor 2x q05		F2R	0.669	g-protein coupled receptor	Inhibited	-2.307		-0.127	-1.894	0.00146	CD24,CXCL3,DSP,GJA1,IGFBP7,IL1B,IL6,KDR,PLAUR,TNFAIP3,VEGFA,VIM	CTNNB1,EGR1,EP300,ERBB2,F2R,FOS,HDAC1,HIF1A,JUN,JUND,MYC,NFKB1,NFkB (complex),SMAD3,SMAD4,SP1,STAT1,STAT3,TGFB1,TP53
mut vs wt d702factor 2x q05		TLR9	0.263	transmembrane receptor	Inhibited	-2.306		-0.161	-1.708	0.1	CD274,CD300A,CXCL10,CXCL2,CXCL3,CXCL6,IFITM1,IL1B,IL6,LCN2,LIPG,MX2,PRDM1,TNC,TNFSF10
mut vs wt d702factor 2x q05		BCL2	-0.448	transporter	Inhibited	-2.247		-0.073	-1.989	0.00069	CDKN1A,COL2A1,ENO2,IGFBP6,IL1B,IL6,NDRG1,NES,NNAT,PLAUR,PRDM1,SNAP25,VEGFA	Akt,BCL2,CEBPB,CTNNB1,EGR1,EP300,FOXO1,GLI1,HDAC1,HIF1A,JUN,NFKB1,PPARG,RAF1,RELA,SMAD3,SP1,STAT3,TP53,glutathione
mut vs wt d702factor 2x q05		CHD1	0.02	enzyme	Inhibited	-2.236		-0.196	-1.798	0.000562	CXCL2,CXCL3,CXCL6,IL1B,IL6
mut vs wt d702factor 2x q05		TEAD3	-0.246	transcription regulator	Inhibited	-2.236		-0.171	-1.854	0.0227	ACTA2,AK5,COL3A1,LOXL1,PCDH18,TNNT2
mut vs wt d702factor 2x q05		CYP1A2	1.304	enzyme	Inhibited	-2.236		-0.009	-2.217	0.0452	CACHD1,CYP2B6,NQO1,SLC46A3,SOCS2
mut vs wt d702factor 2x q05		IRS1	-0.114	enzyme	Inhibited	-2.232		-0.082	-2.049	0.000147	CCN4,COL3A1,CRABP2,FBXO32,FST,GJA1,IL6,MAPK12,MEF2C,PRDM16,SNAI2,SPP1,TNNT2,TNNT3,VEGFA,WNT5A	Akt,CEBPB,CTNNB1,Creb,EGR1,ERK1/2,FOS,FOSL1,FOXO1,FOXO3,IRS1,JUN,Mapk,NFE2L2,NFKB1,NFkB (complex),P38 MAPK,PI3K (complex),SMAD3,SP1,STAT3,ZFP36
mut vs wt d702factor 2x q05		CCR1	1.334	g-protein coupled receptor	Inhibited	-2.219		-0.086	-2.028	0.00515	CCR1,CTSV,SPP1,TNFRSF11A,VIM	CCR1,CEBPB,FOS,IFNG,IL10,IL13,JUN,NFKB1,NFKBIA,NFkB (complex),RELA,STAT1,STAT3,TNF
mut vs wt d702factor 2x q05		MAX	0.403	transcription regulator	Inhibited	-2.219		0.044	-2.317	0.0361	AR,CCND2,CDKN1A,FBXO32,PDK1,SLC2A1,SLC2A3,TNNT2
mut vs wt d702factor 2x q05		AREG	0.346	growth factor	Inhibited	-2.219		-0.062	-2.081	0.322	CENPF,H2AC18/H2AC19,H2BC8,IL6,PTX3
mut vs wt d702factor 2x q05		ICAM1	-0.057	transmembrane receptor	Inhibited	-2.218		-0.153	-1.717	1.71e-05	ACTA2,CDH2,CXCL2,CXCL3,IL1B,IL6,ITGA4,MMP10,SNAI2,VEGFA,VIM	APC,CEBPB,CTNNB1,ICAM1,IFNG,IL17A,ITGB2,JUN,NFKB1,NFKBIA,NFkB (complex),RAC1,RELA,SMAD3,STAT1,STAT3,TP53
mut vs wt d702factor 2x q05		C5AR1	0.129	g-protein coupled receptor	Inhibited	-2.216		-0.122	-1.946	0.124	CXCL2,CXCL3,DCN,IL1B,IL6
mut vs wt d702factor 2x q05		Ni2+		chemical reagent	Inhibited	-2.213		-0.196	-1.78	0.00301	CXCL2,CXCL3,CXCL6,IL6,NDRG1	FN1,NFkB (complex),Ni2+,RELA,SMAD3,SP1,STAT3
mut vs wt d702factor 2x q05		TFEB	1.193	transcription regulator	Inhibited	-2.213		-0.196	-1.78	0.0322	CTSF,IL1B,IL6,VEGFA,WT1
mut vs wt d702factor 2x q05		RORC	0.221	ligand-dependent nuclear receptor	Inhibited	-2.2		-0.132	-1.909	0.00129	CXCL2,CXCL3,CYP2A6 (includes others),CYP2B6,HPGD,IL1B,IL6,LCN2,NAT2,NNMT,S100A9,SLC2A3,SLC30A10,SULF2,SULT1E1,VEGFA	AHR,AR,FOXO3,FOXP3,HDAC4,HIF1A,Hif1,IL1B,LCN2,LMO2,NFKBIA,NFkB (complex),PPARG,RELA,RORC,STAT3,TP53,VHL
mut vs wt d702factor 2x q05		BGN	1.387	other	Inhibited	-2.2		-0.086	-2.011	0.00515	CCN4,CXCL13,CXCL3,IL1B,PLTP	BGN,CEBPB,HIF1A,JUN,NFKBIA,NFkB (complex),SMAD3,SMAD4,STAT3,TGFB1,TNF,TP53
mut vs wt d702factor 2x q05		PDGF BB		complex	Inhibited	-2.199		-0.117	-1.617	0.000201	ACTA2,AVPR1A,BDKRB2,CDKN1A,CDO1,COL3A1,CP,CRYAB,CXCL2,DCN,ENPP1,FRZB,GJA1,GJA5,GJC1,H19,IL1B,IL6,ITGA5,NPR3,PRSS35,SCD,SLC2A3,SLCO1A2,SYK,TNC,TNFAIP3,UNC5B,VEGFA	CTNNB1,Creb,EGFR,EGR1,FGF2,HIF1A,JUN,MMP9,MYC,NFKB1,NFkB (complex),PDGF BB,PTK2,RELA,SMAD3,SP1,STAT3,TP53,VEGFA
mut vs wt d702factor 2x q05		MVP	0.571	other	Inhibited	-2.196		-0.157	-1.852	0.000202	CXCL2,CXCL3,CXCL6,IL1B,IL6	CEBPA,CEBPB,CTNNB1,Creb,EGR1,ERK1/2,FOS,FOXO3,IFNG,JUN,MVP,NFKB1,NFkB (complex),NKX3-1,PPARG,PTEN,RELA,SP1,STAT1,STAT3,TP53,TP63,doxorubicin
mut vs wt d702factor 2x q05		WNT7A	1.088	cytokine	Inhibited	-2.193		-0.176	-1.806	0.000411	CDH2,LMX1B,MMP10,PLAUR,VIM,WNT5A	APC,CTNNB1,FOS,FOXM1,JUN,JUND,MAPK7,MEF2C,MYC,NFE2L2,NFkB (complex),SKP2,SMAD4,SP1,STAT3,TCF,TP53,TWIST1,WNT7A
mut vs wt d702factor 2x q05		norepinephrine		chemical - endogenous mammalian	Inhibited	-2.193		-0.11	-1.794	0.0157	ADRA1B,BDNF,CHST2,DIO2,FST,GRID2,IL1B,IL6,PDE10A,PDE4B,PDE8B,SLC15A1,SLC2A1,VEGFA
mut vs wt d702factor 2x q05		CASP8	-0.104	peptidase	Inhibited	-2.188		0.053	-2.303	0.0845	CASP1,CXCL10,IL1B,IL6,S100A9
mut vs wt d702factor 2x q05		PPARGC1B	-0.358	transcription regulator	Inhibited	-2.178		-0.155	-1.742	0.0114	CKB,DIO2,EGLN3,ERO1A,FBXO32,PDK4,SCD,VEGFA
mut vs wt d702factor 2x q05		XDH	-0.372	enzyme	Inhibited	-2.158		0.022	-2.219	0.000136	ACTA2,AVPR1A,CXCL3,IL1B,PLAUR,SLC2A1,SPP1,VIM	AHR,CASP1,EGFR,FOS,HIF1A,IL1B,JUN,JUNB,MYC,NFKBIA,NFkB (complex),PYCARD,RELA,SMAD3,SP1,SRC,STAT3,TP53,XDH,allopurinol
mut vs wt d702factor 2x q05		TEAD4	0.395	transcription regulator	Inhibited	-2.158		-0.127	-1.805	0.00961	ACTA2,AK5,CDKN1A,COL3A1,IL13RA2,LOXL1,PCDH18,SLC2A3,TNNT2,VEGFA	CTNNB1,Creb,EGR1,NFKB1,STAT3,TEAD4,VEGFA
mut vs wt d702factor 2x q05		NFKBIA	-0.546	transcription regulator	Inhibited	-2.156		-0.056	-1.85	7.92e-05	ADAMTS5,AGTR1,ALOX15B,ATP6V1B1,BCL11A,CCND2,CCR1,CCR3,CDKN1A,CH25H,COL2A1,COL3A1,CP,CRYAB,CTSF,CXCL10,CXCL2,CXCL3,CXCL6,CYP1B1,DCN,ERO1A,FOXF2,IGFBP6,IL1B,IL6,LCN2,PTPRZ1,PTX3,RGS4,S100A9,SERPINB2,TACR1,TNC,TNFAIP3,TNFSF10,VEGFA	AHR,CEBPB,CHUK,CTNNB1,FAS,HDAC3,IKBKB,IL1B,JUN,NFKB1,NFKBIA,NFkB (complex),RELA,SMAD3,SP1,STAT3,TNF,TP53,TP63
mut vs wt d702factor 2x q05		Jnk		group	Inhibited	-2.149		-0.128	-1.665	0.0231	ACTA2,APLN,CDH2,COL3A1,CXCL3,CXCL6,FBXO32,GJA1,IL1B,IL6,ITGA4,ITGB7,NQO1,PLAUR,POU5F1,SNAI2
mut vs wt d702factor 2x q05		Ccl2		cytokine	Inhibited	-2.142		-0.104	-1.873	0.00855	CTSV,CXCL10,CXCL2,CXCL3,IL1B,IL6,KDR	CCR2,CXCL2,CXCL3,Ccl2,Creb,IL10,NFKB1,NFKBIA,NFkB (complex),PPARG,RELA,SMAD3,STAT3
mut vs wt d702factor 2x q05		STAT5B	-0.085	transcription regulator	Inhibited	-2.136		-0.021	-2.02	6.83e-07	A1BG,AKR1C1/AKR1C2,AKR1C3,AR,CCDC141,CCND2,CD70,CDKN1A,CDO1,CORIN,CYP2A6 (includes others),CYP2B6,FBLN1,IL6,MOXD1,MYBPHL,NNMT,NQO1,NT5E,PDK4,PLTP,PVT1,SCD,SH3RF3,SLC34A2,SLC51B,SOCS2,SULT1E1,TF,TMEM45B,TNFRSF11A,TOX	AKT1,AR,CEBPB,CTNNB1,ESR1,FOXO1,FOXO3,HIF1A,IGF1,JUN,NFKB1,NFKBIA,NFkB (complex),PI3K (complex),PRL,SMAD3,SP1,STAT3,STAT5B,TNF,TP53
mut vs wt d702factor 2x q05		SRF	0.266	transcription regulator	Inhibited	-2.101		-0.082	-1.848	0.0146	ACTA2,AVPR1A,BATF,CDKN1A,CLDN5,CORIN,FLT4,FST,ITGA9,KDR,LCN2,LDB3,LRP4,NCOA7,RAI2,S100A9,SEMA3A,SEMA6D,SERPINB2,SLC2A1,SOSTDC1,TNC,TNNT2,WT1
mut vs wt d702factor 2x q05		EDN1	-0.439	cytokine	Inhibited	-2.091		-0.156	-1.486	0.000136	ACTA2,ANXA1,APLN,CDH2,COL5A1,FLT4,FST,GJA1,IL6,ITGA5,ITGB1BP2,IVL,NPPB,PLAUR,SERPINB2,SLC2A1,SOX5,TNC,TUBB1,VEGFA,VIM	CEBPB,CTNNB1,EDN1,EGFR,FOXO1,FOXO3,HIF1A,ITGB1,JUN,NFKB1,NFKBIA,NFkB (complex),NOTCH1,RAC1,RELA,SP1,STAT3,TNF,Vegf
mut vs wt d702factor 2x q05		IFNG	-0.705	cytokine	Inhibited	-2.08		-0.076	-1.344	1.66e-10	ABLIM3,ACTA2,ADGRG2,ADRA2A,AGTR1,ALDH1A3,AVPR1A,BDNF,BST1,BTN3A1,C1R,CASP1,CCL28,CCND2,CCR1,CCR3,CCRL2,CD200,CD274,CDH2,CDKN1A,CEACAM5,CFP,CGAS,CH25H,CHST11,CNR1,CP,CTSV,CXCL10,CXCL2,CXCL3,CXCL6,CYP1A2,DUOX2,DUOXA2,EGLN3,ENTPD2,FAH,FBLN1,FKBP6,FLT4,FOXE1,GAS6,GBP6,GJA1,GJA5,GLIPR2,GMPR,GNG2,GPR158,GPRC5B,H2AC15,H2BC8,IDO2,IFITM1,IFITM2,IL13RA2,IL1B,IL6,ITGA4,ITGA5,ITGB2,KCNMA1,KDR,KLF2,KYNU,LARGE…	AHR,CEBPB,CTNNB1,IFNG,IL1B,IL4,JUN,MYC,NFKBIA,NFkB (complex),RELA,SMAD3,SP1,STAT1,STAT3,TNF,TP53
mut vs wt d702factor 2x q05		LEP	-1.075	growth factor	Inhibited	-2.034		-0.079	-1.582	0.000332	ACSL5,ACTA2,AGTR1,AKR1C1/AKR1C2,ALDOB,APOA2,AR,BDNF,CASP1,CDKN1A,COL2A1,COL3A1,CPS1,CRP,CTSV,CXCL10,IGFBP3,IL1B,IL6,KISS1R,LCN2,MSI1,NHLH2,NPR1,PCSK1,PRDM16,SCD,SIM1,SLC15A1,SLC2A2,SNAP25,SPP1,TNFSF10,VEGFA,VIM,WNT1,WNT5A	AKT1,Akt,CEBPB,CTNNB1,EGR1,FOXO1,FOXO3,HIF1A,IGF1,IL6,JUN,LEP,NFKB1,NFKBIA,NFkB (complex),PPARG,RELA,SMAD3,SP1,STAT3,TP53
mut vs wt d702factor 2x q05		ARNT	-0.142	transcription regulator	Inhibited	-2.032		-0.157	-1.477	4.22e-06	ALDOC,CA9,CCND2,CYP1A1,CYP1A2,CYP1B1,CYP2A6 (includes others),DEGS2,ERO1A,LDHA,LOXL2,NQO1,RGS5,SIM1,SLC2A1,SLC2A3,VEGFA,VIM	AHR,AR,ARNT,CEBPB,CTNNB1,EGR1,EP300,HDAC1,HIF1A,Hif1,JUN,MYC,PPARG,RELA,SMAD3,SP1,STAT3,TP53,VHL
mut vs wt d702factor 2x q05		PRKCD	0.613	kinase	Inhibited	-2.004		-0.093	-1.697	0.114	CD70,CDKN1A,CXCL10,IL1B,IL6,IVL,LIPG,MSI1,NES,SERPINB2,SLC15A1,VEGFA
mut vs wt d702factor 2x q05		salicylamide		chemical drug	Inhibited	-2		0.196	-2.392	3.29e-06	ABCG2,CYP1A1,CYP1A2,CYP1B1	AHR,ARNT,CEBPB,Creb,HIF1A,NFE2L2,RELA,TP53,salicylamide,tetrachlorodibenzodioxin
mut vs wt d702factor 2x q05		finasteride		chemical drug	Inhibited	-2		-0.113	-1.773	0.00127	AR,IL6,KDR,SRD5A1,VEGFA	AR,BRCA1,CTNNB1,Creb,ESR2,MMP9,NFKB1,NFkB (complex),RELA,SMAD3,SP1,TP53,finasteride
mut vs wt d702factor 2x q05		PTPRE	0.213	phosphatase	Inhibited	-2		-0.112	-1.776	0.00233	CXCL2,CXCL3,PLA1A,SLA	JUN,NFKBIA,NFkB (complex),PTPRE,SMAD3,STAT1,STAT3
mut vs wt d702factor 2x q05		CBX7	0.376	other	Inhibited	-2		0.175	-2.35	0.00763	CYP1B1,KYNU,PAPPA,PRDM1
mut vs wt d702factor 2x q05		TEAD2	-0.577	transcription regulator	Inhibited	-2		-0.186	-1.627	0.0653	AK5,COL3A1,LOXL1,PCDH18,TNNT2
mut vs wt d702factor 2x q05		H-7		chemical - kinase inhibitor	Inhibited	-2		0.157	-2.313	0.0961	CYP1A1,ITGA5,SAA1,VDR
mut vs wt d702factor 2x q05		zymosan		chemical - endogenous non-mammalian		-1.999		-0.093	-1.812	0.398	CXCL2,CXCL3,IL1B,IL6
mut vs wt d702factor 2x q05		TLR4	0.944	transmembrane receptor		-1.998		-0.146	-1.455	0.0164	BATF,CCND2,CD200,CD274,CD70,CXCL10,CXCL2,CXCL3,CXCL6,DUOX2,FBXO32,GJA1,IL1B,IL6,LCN2,NMI,PLA1A,PRDM1,PTX3,RGCC,SH3BP5,SLA,SPP1,TNFAIP3,TNFSF10,UGT1A1
mut vs wt d702factor 2x q05		NLRC4	-0.327	other		-1.997		-0.196	-1.606	0.00172	CXCL2,CXCL3,CXCL6,IL1B	AHR,CASP1,Gm21596/Hmgb1,IL1B,JUNB,NFATC2,NFE2L2,NFKB1,NFKBIA,NFkB (complex),NLRC4,PARP1,PPARG,PYCARD,RELA,STAT3,TP53
mut vs wt d702factor 2x q05		GATA1	-1.567	transcription regulator		-1.996		-0.076	-1.742	0.191	ALOX5,CCND2,CCR1,CCR3,CNN3,DMTN,ENPP1,INHA,INHBB,INSM1,KDR,MYCN,NCOA7,TFEB,TUBB1,VDR
mut vs wt d702factor 2x q05		2-mercaptoacetate		chemical drug		-1.982		-0.196	-1.594	0.011	CXCL2,CXCL3,IL1B,IL6
mut vs wt d702factor 2x q05		C9	-0.011	other		-1.98		-0.125	-1.733	0.00124	COL3A1,CXCL2,CXCL3,IL1B	AHR,C9,CXCL2,Ccl2,IL1B,NFKBIA,NFkB (complex),RELA,STAT3
mut vs wt d702factor 2x q05		CD24	-1.086	other		-1.98		-0.177	-1.629	0.313	CDKN1A,EMP3,PLCB1,SLC4A4,ULBP2,VDR
mut vs wt d702factor 2x q05		KNG1	-0.262	other		-1.977		-0.149	-1.683	0.0414	BDKRB2,IL1B,IL6,KDR
mut vs wt d702factor 2x q05		EIF2AK3	-0.103	kinase		-1.977		-0.143	-1.606	0.0434	BDNF,CA9,CPA1,ERO1A,IL1B,IL6,NDRG1,PRDM1,VEGFA
mut vs wt d702factor 2x q05		LPIN1	-0.029	phosphatase		-1.974		-0.065	-1.846	0.0373	CDKN1A,IL1B,IL6,SCD
mut vs wt d702factor 2x q05		CLEC4E		other		-1.972		-0.196	-1.586	0.00763	CXCL2,CXCL3,IL1B,IL6	CCL5,CLEC4E,CREB1,CXCL2,CXCL3,Ccl2,Creb,NFE2L2,NFkB (complex),RELA,SREBF1,STAT1,STAT3,cholesterol
mut vs wt d702factor 2x q05		NEUROG3	-1.858	transcription regulator		-1.97		-0.191	-1.375	0.00127	CDH2,CHGA,CTSV,MNX1,NEUROG3,PCSK1,PPY,RORB,SEMA3A,SNAI2
mut vs wt d702factor 2x q05		HGF	-1.131	growth factor		-1.969		-0.136	-1.203	5.29e-05	ABCG2,ACTA2,ADAMTS1,ANGPTL2,CA9,CASP1,CDKN1A,CENPF,COL2A1,COL3A1,CRYAB,CXCL2,CYP2B6,DOK5,HLX,IGFBP3,IL1B,IL6,KIF15,LCN2,LDHA,MMP10,NES,NID2,PLAUR,PPY,PTPRR,S100A9,SEMA3A,SERPINB2,SLC2A2,SOCS2,SPP1,STC1,TACR1,TNFAIP3,TNFRSF10C,VDR,VEGFA,VIM,WT1	AHR,CEBPB,ERBB2,HGF,IL6,JUN,NFKB1,NFKBIA,NFkB (complex),PPARG,RELA,SMAD3,SP1,STAT3,TP53
mut vs wt d702factor 2x q05		trametinib		chemical drug		-1.969		-0.122	-1.728	0.0016	CD274,GPNMB,SNAI2,TNFAIP3,TNFSF10	Akt,EGR1,FOXO1,GLI2,JUN,MAP2K1,NFKB1,SMAD3,SP1,STAT3,trametinib
mut vs wt d702factor 2x q05		IL-1R		group		-1.969		-0.18	-1.615	0.0264	COL3A1,CXCL2,IL1B,IL6
mut vs wt d702factor 2x q05		carrageenan		chemical drug		-1.969		-0.187	-1.601	0.0699	CXCL2,CXCL3,IL1B,IL6,VEGFA
mut vs wt d702factor 2x q05		TLR5	-0.277	transmembrane receptor		-1.967		-0.173	-1.626	0.0772	CXCL2,CXCL3,IL1B,IL6
mut vs wt d702factor 2x q05		ITGA5	1.35	transmembrane receptor		-1.964		-0.151	-1.668	0.00101	CDH2,CDKN1A,CHRD,COL2A1,GJA1,IL1B,IL6,PLAUR	CTNNB1,Creb,EGR1,EP300,ERK1/2,FN1,FOS,FOXO3,HDAC1,HIF1A,ITGA5,ITGB1,JUN,NFKB1,NFkB (complex),RAC1,RELA,SMAD3,SP1,STAT3,TP53
mut vs wt d702factor 2x q05		inosine		chemical - endogenous mammalian		-1.964		-0.151	-1.668	0.18	ANXA1,CXCL13,EMP3,VIM
mut vs wt d702factor 2x q05		CNR1	-2.46	g-protein coupled receptor		-1.962		-0.091	-1.646	0.00975	APCDD1,ARTN,BDNF,CA9,CNR1,CXCL10,IL6,LRP4,NTN1,PTK6,SIX1,SLIT2,TACR1	CNR1,Creb,EGR1,ERK1/2,FOS,JUN,JUND,MYC,NFKB1,NFkB (complex),SCD,SP1,STAT1,TP53
mut vs wt d702factor 2x q05		poly rI:rC-RNA		biologic drug		-1.961		-0.132	-1.142	0.00446	ANXA1,BTN3A3,CCND2,CD200,CD274,CD70,CDH2,CENPF,CGAS,CHN1,CRP,CXCL10,CXCL2,CXCL3,CXCL6,DIO2,GBP6,IFITM1,IGFBP6,IGSF9B,IL13RA2,IL1B,IL6,ITGA5,KYNU,LIPG,MARS2,NAT1,NCOA7,NMI,PLAUR,POU5F1,PTK6,SAMD9,SERPINB2,SLC2A2,SNAI2,SYK,TNFAIP3,TNFSF10,VEGFA,VIM,WNT5A,ZFP42	CEBPB,CTNNB1,HDAC3,IFNB1,IFNG,JUN,MYC,NFKB1,NFKBIA,NFkB (complex),PPARG,RELA,STAT1,STAT3,TNF,poly rI:rC-RNA
mut vs wt d702factor 2x q05		Hsp27		group		-1.961		-0.005	-1.951	0.139	CD274,CDKN1A,FBXO32,IL6
mut vs wt d702factor 2x q05		LIPG	-1.045	enzyme		-1.949		0	-1.949	0.011	IL1B,IL6,PLTP,VEGFA
mut vs wt d702factor 2x q05		halofuginone		chemical drug		-1.948		0.165	-2.374	4.16e-07	ACP5,BGN,CD200,CKB,CP,CTHRC1,CXCL10,CYGB,FSTL1,FXYD6,H19,IFITM2,IGFBP3,IL13RA2,LOX,NLGN1,RGCC,SAA1,SLC13A3,SPP1,ST3GAL2,WNT5A	CTNNB1,FOS,JUN,JUND,MYC,NFkB (complex),SP1,STAT1,STAT3,TP53,halofuginone
mut vs wt d702factor 2x q05		hydrogen peroxide		chemical - endogenous mammalian		-1.946		-0.107	-1.327	0.00258	ACTA2,AKR1C1/AKR1C2,ALOX5,AR,AVPR1A,CASP1,CDKN1A,CNR1,CRYAB,CXCL3,CXCL6,CYP1A1,CYP1A2,FBXO32,GLRX,IL1B,IL6,KDR,KLF2,LCN2,MIAT,MMP10,NQO1,PLAUR,POU5F1,PTN,PTX3,SNAI2,SPP1,STC1,TNFAIP3,TNFRSF10C,VDR,VEGFA,VIM,WNT5A	AKT1,CEBPB,FOS,FOXO3,HDAC1,IL6,JUN,JUND,MYC,NFKBIA,NFkB (complex),RELA,SP1,STAT3,TNF,TP53,hydrogen peroxide
mut vs wt d702factor 2x q05		nickel chloride		chemical toxicant		-1.944		-0.112	-1.726	0.00233	IL1B,IL6,NDRG1,VEGFA	Akt,CEBPB,CTNNB1,EGR1,FOXO1,FOXO3,IKBKB,JUN,MAPK14,NFKB1,NFKBIA,NFkB (complex),PI3K (complex),PPARG,RELA,SMAD3,SP1,STAT3,TP53,TP63,TP73,nickel chloride
mut vs wt d702factor 2x q05		TGIF1	-0.196	transcription regulator		-1.944		0	-1.944	0.00396	CXCL2,CXCL3,IL1B,IL6	CEBPB,CTNNB1,EP300,HDAC1,JUN,MAPK14,NFE2L2,NFKB1,NFkB (complex),NOTCH1,P38 MAPK,PPARGC1A,RELA,SP1,SPZ1,SREBF1,STAT3,TGIF1,TP53,TP73,TWIST1,ZFP36,cholesterol
mut vs wt d702factor 2x q05		ECSIT	0.163	transcription regulator		-1.944		-0.196	-1.563	0.0264	IL1B,IL6,PLAUR,TNFAIP3
mut vs wt d702factor 2x q05		lysophosphatidylcholine		chemical - other		-1.942		-0.147	-1.56	0.0335	CD274,CD70,GJA1,IL1B,IL6,PLAUR,SCD
mut vs wt d702factor 2x q05		F3	0.096	transmembrane receptor		-1.941		-0.196	-1.431	0.0255	GJA1,IL1B,IL6,LEF1,SEMA3A,TNFRSF11A,VEGFA
mut vs wt d702factor 2x q05		3-methyladenine		chemical toxicant		-1.941		-0.039	-1.865	0.0772	ADAMTS5,CXCL2,IL1B,IL6
mut vs wt d702factor 2x q05		GH1	0.737	growth factor		-1.941		-0.036	-1.847	0.233	CDH2,IGFBP3,IL6,SOCS2,SPP1,TFAP2A,VIM
mut vs wt d702factor 2x q05		IKBKE	-0.047	kinase		-1.94		-0.158	-1.471	0.00422	ALDOC,CXCL10,CXCL2,CXCL6,IL6,LDHA,PDK4,SLC16A3,SLC2A1,SLC2A3	C/EBP,Ccl2,HDAC3,IFNB1,IKBKE,IKBKG,JUN,NFKB1,NFKBIA,NFkB (complex),PPARG,RELA,STAT1,STAT3,TRAF3IP2
mut vs wt d702factor 2x q05		EGFR	-0.311	kinase		-1.939		-0.093	-1.477	0.000502	A4GALT,ABCG2,ACTA2,ADGRL3,ANXA1,AR,CD274,CDKN1A,COL3A1,COL8A1,CRYAB,CXCL10,DSC2,GJA1,IGFBP3,IL13RA2,IL1B,IL6,INSM1,KIRREL1,LCN2,LEF1,MT1F,NT5E,PDK1,PLAUR,POU5F1,SLC2A1,SLC2A3,SNAI2,ST3GAL2,TNC,TNNT3,UGT8,UNC5B,VDR,VEGFA,VIM	Akt,CTNNB1,EGFR,EGR1,EP300,ERBB2,FOXM1,FOXO1,HDAC1,JUN,KRAS,MYC,Mek,NFE2L2,NFKB1,NFkB (complex),SMAD3,SP1,STAT3,TP53
mut vs wt d702factor 2x q05		1-methyl-4-phenyl-1,2,3,6-tetrahydropyridine		chemical toxicant		-1.934		-0.095	-1.75	0.239	BDNF,CASP1,CNR1,IL1B,IL6
mut vs wt d702factor 2x q05		HSPD1	0.575	enzyme		-1.933		-0.133	-1.676	0.0232	CXCL2,CXCL3,IL1B,IL6
mut vs wt d702factor 2x q05		FSTL1	-1.22	other		-1.932		-0.196	-1.554	0.00172	CASP1,FSTL1,IL1B,IL6	AKT1,CEBPB,FOXO3,FSTL1,MYD88,NFKB1,NFKBIA,NFkB (complex),RELA,SP1,STAT1,STAT3,TLR2,TP53
mut vs wt d702factor 2x q05		MALP-2s		chemical reagent		-1.927		-0.196	-1.55	0.0298	CXCL2,CXCL3,IL1B,IL6
mut vs wt d702factor 2x q05		IL15	0.81	cytokine		-1.925		-0.113	-1.419	0.0016	ALDOC,ANXA1,ARHGDIB,CCND2,CCR1,CD274,CDKN1A,CXCL10,CXCL2,CXCR6,ENO2,GCNT1,GLDC,H2AC18/H2AC19,HLX,IFITM1,IL1RAP,IL6,ITGB7,KLF2,LDHA,LEF1,NHLH2,PDE4B,PDK1,PRDM1,SLC16A3,SOCS2,TNFRSF10C,TNFSF10,ULBP2,VDR,VEGFA	CTNNB1,FOXO3,IL10,IL15,IL2,IL4,JUN,MYC,NFKB1,NFKBIA,NFkB (complex),RELA,SP1,STAT1,STAT3,TLR2,TP53
mut vs wt d702factor 2x q05		CYBB	0.311	enzyme		-1.915		-0.127	-1.584	0.000592	COL3A1,CXCL10,CXCL3,DUOX2,IL1B,IL6,TNFRSF11A	Akt,CEBPB,CYBB,Creb,EGR1,ERK1/2,FOS,FOXO1,IKBKB,JUN,NFKB1,NFKBIA,NFkB (complex),P38 MAPK,RELA,SMAD3,SP1,STAT3,TP53,TP63,ZFP36
mut vs wt d702factor 2x q05		EPHX2	0.497	enzyme		-1.869		-0.024	-1.824	0.00396	BDNF,CXCL6,IL1B,IL6	CEBPB,CXCL2,Creb,EPHX2,ERK,HMOX1,IL1A,JUN,NFE2L2,NFKBIA,NFkB (complex),P38 MAPK,PPARG,RELA,SMAD3,STAT1,STAT3,ZFP36
mut vs wt d702factor 2x q05		uric acid		chemical - endogenous mammalian		-1.858		-0.03	-1.786	0.167	ANXA1,CASP1,CRP,CXCL2,CXCL3,IL1B,IL6
mut vs wt d702factor 2x q05		phenylephrine		chemical drug		-1.832		-0.12	-1.482	0.00413	COL3A1,DIO2,FST,GJA1,KCND3,NPPB,PDK4,RGS4,UCA1	CEBPB,ERK,FOS,GATA4,JUN,MAPK8,NCOA2,NFkB (complex),NKX2-5,P38 MAPK,PPARG,RELA,SMAD3,STAT3,TBX5,ZFP36,corticosterone,phenylephrine
mut vs wt d702factor 2x q05		SCARB1	0.336	transporter		-1.811		0.032	-1.893	0.00451	APOB,APOD,CXCL2,FBXO32,IL1B,IL6,SPP1	APOE,CEBPB,CTNNB1,CXCL2,Ige,JUN,NFATC2,NFE2L2,NFKB1,NFKBIA,NFkB (complex),P38 MAPK,RELA,SCARB1,SREBF1,STAT3,ZFP36,cholesterol
mut vs wt d702factor 2x q05		erlotinib		chemical drug		-1.806		-0.111	-1.442	0.000645	COL8A1,CXCL3,CXCL6,IGFBP6,IGFBP7,IL13RA2,IL1B,IL6,MMP10,PLAUR,SERPINB2,SLC2A3	CEBPB,EGFR,HIF1A,IL1A,JUN,NFKB1,NFKBIA,NFkB (complex),PPARG,RELA,SP1,STAT3,TNF,erlotinib,paclitaxel
mut vs wt d702factor 2x q05		ITGA9	1.444	other		-1.8		-0.178	-1.337	2.44e-05	ACTA2,CDH2,CXCL6,IL1B,IL6,TNC,VIM	CTNNB1,FN1,FOXM1,FOXO3,HIF1A,ITGA9,ITGB1,JUN,NFE2L2,NFKBIA,NFkB (complex),RELA,SMAD2,SMAD3,SMAD4,SP1,SPP1,STAT3,TCF,TNC
mut vs wt d702factor 2x q05		HDAC4	-0.097	transcription regulator		-1.796		0.035	-1.915	4.7e-06	BDNF,CDKN1A,CHN1,FST,GABRB2,IL6,KLF2,LDHA,LGI1,MEF2C,MMP10,MYLK2,MYOM2,RAB3C,RGS4,SERPINB2,SLC2A1,SNAP25,VEGFA	GATA2,GATA3,GATA4,HDAC1,HDAC3,HDAC4,Hdac,Hif1,Histone h3,Histone h4,KMT2A,MED1,MEF2C,RELA,RNA polymerase II,SIRT1,SP1,TBX5,tributyrin
mut vs wt d702factor 2x q05		GLI2	-0.309	transcription regulator		-1.794		-0.087	-1.555	1.21e-07	CCND2,CCR1,CDKN1A,CSTA,CXCL10,CXCL2,CXCL3,CXCL6,IL1B,IL6,IVL,MEF2C,MYCN,NTN1,PGC,SMO,SPP1,VDR,VIM	AR,CTNNB1,FOXO1,GLI2,HDAC1,IL4,JUN,MYC,NFkB (complex),PPARG,PTHLH,RELA,RNA polymerase II,SOX9,SP1,STAT3,TERT,TP53
mut vs wt d702factor 2x q05		Ap1		complex		-1.791		-0.18	-1.269	0.0292	BDNF,CHRD,HPGD,IGFBP3,IL1B,IL6,NDRG1,NQO1,PRDM1,RSPO3,SNAI2,VDR,VEGFA
mut vs wt d702factor 2x q05		HMGB1	-0.703	transcription regulator		-1.788		-0.16	-1.411	0.155	CD274,CDKN1A,CXCL3,CXCL6,IL1B,IL6
mut vs wt d702factor 2x q05		KLF4	-0.077	transcription regulator		-1.781		-0.097	-1.273	8.08e-06	ACTA2,ADAMTS1,APCDD1,CCND2,CDKN1A,CDKN1C,COL8A1,CRABP2,CYP1A1,DSP,EVPL,FOXE1,FRZB,GREB1,IL6,IVL,KDR,MEF2C,PCDH18,PITX2,PLAUR,POU5F1,PRDM1,SERPINB2,SNAI2,TF,TNC,VEGFA,VIM,WNT5A,ZFP42	AHR,CREBBP,CTNNB1,EGR1,EP300,FOXM1,HDAC1,JUN,KLF4,NFKB1,NFKBIA,NFkB (complex),PPARG,RELA,SMAD3,SMAD4,SMAD7,SP1,STAT3,TCF,TP53
mut vs wt d702factor 2x q05		GSK2816126		chemical drug		-1.762		-0.104	-1.396	5.19e-08	BMP5,CD200,CDH2,CER1,CXCL10,DUOX2,FRZB,IL6,PTH1R,SOSTDC1,SPP1,TNFRSF11A,TNFSF10	EZH2,GATA3,GSK2816126,HDAC1,Histone h3,KMT2A,MED1,NFKB1,RELA,RNA polymerase II,SP1,STAT3
mut vs wt d702factor 2x q05		camptothecin		chemical drug		-1.759		-0.06	-1.539	0.0314	ABCC2,ACTA2,AR,BCL11A,BTN3A3,CASP1,CCR1,CCRL2,CD200,CD70,CDKN1A,CHST11,CXCL2,CXCL3,CXCL6,F5,FES,FOXC1,GPNMB,IGFBP3,IL1B,IL1RAP,IL6,LGALS7/LGALS7B,MEF2C,PTX3,RRM2B,SAA1,SERPINB2,SFTPC,SPP1,STC2,SYK,TNFAIP3,VEGFA,WT1
mut vs wt d702factor 2x q05		CD28	-0.786	transmembrane receptor		-1.755		-0.122	-1.13	0.000324	ANXA1,ARHGDIB,CCND2,CD274,CENPF,CH25H,CXCL13,CXCL2,CXCR6,H19,H2AC18/H2AC19,IFITM1,IGFBP6,IL1B,IL1RAP,IL6,ITGA4,ITGB7,KLF2,LDHA,PDE4B,PRDM1,SLC16A3,SOCS2,TNFAIP3,TNFRSF11A,TNFSF10,TUBB1,VIPR1,XCL1	CD28,CEBPB,FOXO3,FOXP3,HDAC4,IL10,IL2,IL4,JUN,LMO2,NFKB1,NFKBIA,NFkB (complex),RELA,SP1,STAT1,STAT3,TNF,TP53
mut vs wt d702factor 2x q05		D-galactosamine		chemical - endogenous mammalian		-1.755		-0.166	-1.355	0.00937	CASP1,CXCL10,CXCL2,IL6,PTN,TNFSF10	CEBPB,CXCL2,Ccl2,D-galactosamine,IFNG,IL1,JUN,NFKB1,NFKBIA,NFkB (complex),PPARG,RELA,STAT1,STAT3
mut vs wt d702factor 2x q05		palmitic acid		chemical - endogenous mammalian		-1.754		-0.078	-1.44	0.0208	CDKN1A,CGAS,CNR1,CXCL10,CXCL2,CXCL3,EGLN3,FBXO32,HTR2C,IL1B,IL6,LCN2,NTN1,PDK4,SCD,SLC2A2,TNFSF10
mut vs wt d702factor 2x q05		NRG1	0.268	growth factor		-1.747		-0.11	-1.29	0.0014	AR,ARTN,CCND2,CDKN1A,CXCL6,FSTL1,GAS6,ITGB2,MNX1,MUSK,NDRG1,NR5A1,PDE3A,PLAUR,POU5F1,SLC2A1,SLC2A3,SLIT2,TF,TNNT2,TNS1,VEGFA,VIM	AKT1,CEBPB,CTNNB1,EGF,ERBB3,FOS,FOXO3,HIF1A,JUN,MYC,NFkB (complex),NRG1,PGR,SMAD2,SMAD3,SP1,SRC,STAT1,STAT3,TP53
mut vs wt d702factor 2x q05		TAZ	0.055	enzyme		-1.744		-0.127	-1.292	1.17e-08	ADAMTS1,ADAMTS5,ALDOC,ANXA1,BDNF,CDH2,COL5A1,CYP1B1,FLG,LDHA,LOX,LOXL2,LRP2,NLRP2,PTX3,RGS4,SFTPC,SLC2A1,VEGFA,WNT11
mut vs wt d702factor 2x q05		KDM8	-0.357	enzyme		-1.744		-0.136	-1.338	0.00377	CD24,ENO2,IGFBP3,LDHA,PDK1,PDK4,SLC2A1,VEGFA,WNT5A	AR,EPAS1,HIF1A,Hif1,KDM8,NFkB (complex),PKM,PPARG,SMAD2,SP1,SREBF1,STAT3,TP53,VHL
mut vs wt d702factor 2x q05		COCH	-1.041	other		-1.732		-0.147	-1.478	0.000349	CXCL2,IL1B,IL6,ZFP42
mut vs wt d702factor 2x q05		CD36	-0.037	transmembrane receptor		-1.73		-0.154	-1.21	0.000216	APOB,CXCL3,CXCL6,IGFBP6,IGFBP7,IL1B,IL6,MMP10,PLAUR,SCD,SERPINB2,SYK,TNFRSF10C	CD36,CEBPB,FOS,JUN,JUND,MYC,NFE2L2,NFKB1,NFKBIA,NFkB (complex),P38 MAPK,PPARD,PPARG,RELA,RXRA,SP1,SREBF1,STAT3,TLR2,TP53,ZFP36,cholesterol,linoleic acid
mut vs wt d702factor 2x q05		NRIP1	0.082	transcription regulator		-1.727		0.1	-1.963	0.00515	CDKN1A,CYP1A1,CYP4B1,IL1B,IL6,PDK4,PTX3,SCD	Akt,EGR1,ESR1,ESR2,FOS,FOXO1,JUN,JUND,MYC,NCOA2,NFKB1,NR5A2,NRIP1,PPARD,PPARG,PPARGC1A,RARA,RNA polymerase II,RXRA,SIRT1,SMAD3,SP1,STAT1,TP53,estrogen receptor
mut vs wt d702factor 2x q05		LGALS3	-0.566	other		-1.725		-0.045	-1.593	0.000939	CCR1,CDKN1A,COL3A1,CTSF,CTSV,CXCL2,CXCL3,IL1B,IL6,LGALS7/LGALS7B,PRDM1,SAA1	AHR,CEBPB,Creb,EGR1,ERK,ERK1/2,FOS,IL6,JUN,LGALS3,NFKB1,NFKBIA,NFkB (complex),PPARG,RELA,SMAD3,SP1,STAT3,TNF
mut vs wt d702factor 2x q05		TNFSF4	0.06	cytokine		-1.719		-0.158	-1.447	0.0232	BATF,CXCL13,IL6,PRDM1
mut vs wt d702factor 2x q05		DAZ2		translation regulator		-1.715		-0.022	-1.678	0.000561	INHA,INHBB,TET1,ZFP42
mut vs wt d702factor 2x q05		LHX1	-0.853	transcription regulator		-1.715		-0.196	-1.043	0.00158	ALDOB,CER1,DAB1,GCNT1,LRP2,PCP4,PDPN,SEMA6D,SIM1,SOSTDC1,TMEM52B,UGT1A3
mut vs wt d702factor 2x q05		Pam3-Cys-Ser-Lys4		chemical reagent		-1.713		-0.13	-1.291	0.00298	BATF,BDKRB2,CCR1,CD274,CXCL10,CXCL13,CXCL2,CXCL3,CXCL6,IL1B,IL6,ITGA4,ITGB7,SLC16A3,TNFRSF11A	CTNNB1,CXCL2,IL10,JUN,MYC,MYD88,NFKB1,NFKBIA,NFkB (complex),Pam3-Cys-Ser-Lys4,RELA,STAT1,STAT3,TLR2
mut vs wt d702factor 2x q05		FCGR2A	0.406	transmembrane receptor		-1.71		-0.175	-1.292	0.00579	CXCL10,CXCL2,CXCL3,IL1B,IL6,VEGFA	CEBPB,Ccl2,FCGR2A,IL10,JUN,NFKB1,NFKBIA,NFkB (complex),P38 MAPK,PPARG,RELA,STAT3,TP53,ZFP36
mut vs wt d702factor 2x q05		KDM3A	-0.08	transcription regulator		-1.709		-0.176	-1.248	0.00183	ACTA2,AR,FLNC,GNG2,LOXL2,PLOD2,TNC
mut vs wt d702factor 2x q05		MAFB	0.577	transcription regulator		-1.709		-0.124	-1.385	0.0302	AKR1B10,CXCL2,HOXA3,OLFML2B,OLFML3,PRDM1,SERPINB2,SLC2A2
mut vs wt d702factor 2x q05		SOX11	-0.903	transcription regulator		-1.706		-0.126	-1.275	0.0168	CD24,CP,DMBT1,IL6,ITGA4,LEF1,NTN1,PRDM1,PTH1R,TIAM1,TMSB15A,YPEL1
mut vs wt d702factor 2x q05		ATF4	-0.032	transcription regulator		-1.704		-0.166	-1.078	0.000548	ABCG2,ANGPTL3,BCL11A,CA9,CDKN1A,CXCL2,ERO1A,IGFBP7,IL6,LINC01714,NDRG1,NID2,PTX3,SH3RF3,SNAI2,STC2,TNFRSF11A,VEGFA,WNT11	AR,ATF4,C/EBP,CEBPB,CTNNB1,CXCL8,Creb,DDIT3,HIF1A,Hif1,JUN,MYC,NFE2L2,NFKB1,NFkB (complex),PPARG,RELA,SMAD3,STAT1,STAT3,VHL
mut vs wt d702factor 2x q05		PADI2	-0.502	enzyme		-1.698		-0.127	-1.39	7.06e-05	CXCL2,CXCL3,CXCL6,IL6,SNAI2,VIM	FOS,JUN,MED1,NFKB1,NFKBIA,NFkB (complex),NRIP1,PADI2,PPARG,RELA,STAT3,TP53,estrogen receptor
mut vs wt d702factor 2x q05		GATA2	0.155	transcription regulator		-1.684		-0.057	-1.416	0.000476	AK1,ALOX5,ANGPTL2,AR,CCR3,CDKN1A,CHGA,CLDN18,CPA1,CSTA,CXCL10,CXCL2,DDIT4L,DIO2,DMBT1,IGFBP7,IL6,INKA2,KDR,KLF2,LCN2,MEF2C,S100A9,SERPINB2,SLC22A4,SSTR2,TPH1,TSPAN12,TUBA3E,TUBB1,VEGFA,ZMAT3,ZNF365	Akt,CTNNB1,EGR1,FOS,FOXO1,GATA2,JUN,JUND,MYC,NFKB1,NFkB (complex),SMAD3,SP1,STAT1,STAT3,TP53
mut vs wt d702factor 2x q05		MIF	-0.208	cytokine		-1.684		-0.121	-1.292	0.0161	ACTA2,CCR1,CRP,CXCL2,CXCL3,CXCR6,IL1B,IL6,ITGA4,MYCN,RAMP2
mut vs wt d702factor 2x q05		PDX1	1.58	transcription regulator		-1.669		-0.049	-1.477	0.00125	ALDOB,CDO1,CKB,COL3A1,CXCL2,ERO1A,IGFBP3,IL1B,IL6,MAN1A1,NEUROG3,NNAT,NQO1,PCSK1,PDE4B,SLC2A1,SLC2A2,SPP1	Histone h3,KMT2A,MED1,PDX1,RELA,RNA polymerase II,SP1
mut vs wt d702factor 2x q05		HOXC8	-0.797	transcription regulator		-1.664		-0.006	-1.649	0.00207	CXCL10,ELMO1,GREM2,NQO1,SLC16A3,SPP1
mut vs wt d702factor 2x q05		HLX	-1.971	transcription regulator		-1.664		0.086	-1.873	0.00244	CDKN1C,CYP1B1,KYNU,PAPPA,PRDM1,UNC5B
mut vs wt d702factor 2x q05		CD3 group		group		-1.664		-0.163	-1.268	0.0247	ACSL5,IL1B,KLF2,LDHA,SCD,SLC16A3
mut vs wt d702factor 2x q05		CCL11		cytokine		-1.642		-0.182	-1.218	0.0114	CCL28,CCR3,CXCL2,CXCL3,CXCL6,IL1B,IL6
mut vs wt d702factor 2x q05		STAT3	-0.146	transcription regulator		-1.64		-0.097	-1.038	5.13e-08	ACTA2,ALDH1A3,BATF,CA9,CASP1,CCND2,CCR1,CCRL2,CD274,CDH2,CDKN1A,COL3A1,COL5A1,CRP,CXCL10,CXCL13,CXCL2,CXCL3,CXCL6,DMBT1,FST,GBP6,GJA1,H2AC18/H2AC19,HAVCR1,IFITM1,IFITM2,IL13RA2,IL1B,IL6,ITGB2,KDR,LDHA,LOX,LRP2,MMP10,MX2,NDRG1,NES,PCSK1,PCSK9,PDK1,PLAUR,POU5F1,PRDM1,PTN,S100A9,SAA1,SLC2A1,SNAI2,STC2,TNFSF10,TNS1,TRPM3,VEGFA,VIM,WNT5A	AHR,CEBPB,IFNG,IL17A,IL1B,JUN,NFKB1,NFKBIA,NFkB (complex),PPARG,RELA,SMAD3,SP1,STAT1,STAT3,TNF,TP53
mut vs wt d702factor 2x q05		SIX5	-0.177	transcription regulator		-1.633		-0.179	-1.193	0.000411	COL9A2,PLTP,PTN,SIM1,SIX2,SLC6A13
mut vs wt d702factor 2x q05		PARP1	-0.225	enzyme		-1.63		-0.1	-1.304	0.00229	CD274,CDKN1A,COL3A1,CXCL10,CXCL3,GBP6,H19,IL1B,IL6,NAT1,PLA1A,SOCS2,TMSB15A	CEBPB,CTNNB1,Creb,EGR1,ERK1/2,FOS,Gm21596/Hmgb1,JUN,JUNB,MYC,NFATC1,NFATC2,NFKB1,NFKBIA,NFkB (complex),PARP1,RELA,SP1,STAT1,STAT3,TNF,TP53
mut vs wt d702factor 2x q05		MAP3K7	-0.022	kinase		-1.622		-0.087	-1.365	0.0019	CH25H,CXCL10,CXCL2,CXCL6,IFITM1,IL1B,IL6,SAA1,TNFSF10,WNT5A	CTNNB1,IKBKG,JUN,MAP3K7,MYC,NFATC1,NFKB1,NFKBIA,NFkB (complex),PPARG,RELA,STAT1,STAT3,TAB1,TP53
mut vs wt d702factor 2x q05		Pam3-Cys		chemical toxicant		-1.62		-0.151	-1.259	0.0129	CXCL10,CXCL2,CXCL3,IL1B,IL6,TNC
mut vs wt d702factor 2x q05		bucladesine		chemical toxicant		-1.614		-0.111	-0.969	9.06e-10	ADAMTS1,AKR1B10,ANXA1,AR,BDKRB2,BDNF,CDH2,CDKN1A,CHGA,CHST2,CRYAB,CXCL10,CXCL3,DIO2,EGLN3,ENO2,ENPP1,FAH,FRRS1,FST,H19,IGFBP3,IGFBP6,IL1B,IL6,INHBB,ITGB2,MYCN,NPPB,PDE10A,PDE4B,PDE8B,PTH1R,SEMA6D,SFTPC,SLC15A1,SLC2A1,SNAP25,STC1,SULT1E1,SYT4,TF,VDR	CEBPB,Creb,EGR1,EP300,FOS,HDAC1,IL6,JUN,NFKB1,NFKBIA,NFkB (complex),NGF,RELA,SMAD3,SP1,STAT3,TNF,TP53,bucladesine,cyclic AMP
mut vs wt d702factor 2x q05		EIF2AK2	-0.234	kinase		-1.612		-0.178	-1.122	0.0255	BDNF,CDKN1A,IFITM1,IFITM2,IL1B,IL6,NMI,NNMT,TNFAIP3
mut vs wt d702factor 2x q05		FOXP1	-0.161	transcription regulator		-1.611		0.045	-1.727	6.84e-05	CDKN1A,GJA1,IL6,MEF2C,POU5F1,PRDM1,SCGB1A1,SFRP4,WNT1	FOS,FOXP1,GJA1,JUN,JUND,MYC,NFkB (complex),SP1,TP53
mut vs wt d702factor 2x q05		PIK3R1	-0.125	kinase		-1.594		-0.11	-1.244	0.00105	ACTA2,AR,CCND2,CXCL10,IL1B,IL6,LDHA,NEUROG3,PDK1,SLC2A1,VEGFA	AKT1,Akt,CEBPB,CTNNB1,EGR1,FOS,FOXO1,FOXO3,HIF1A,Immunoglobulin,JUN,MYC,NFKB1,NFkB (complex),NR4A1,PIK3R1,SMAD3,SP1,SRC,STAT1,STAT3,TP53
mut vs wt d702factor 2x q05		phosphate		chemical - endogenous mammalian		-1.58		-0.069	-1.353	0.000939	ANKH,COL19A1,COL5A1,DAAM2,DCN,DIO2,ENPP1,LDHA,SLC34A2,SPP1,STC1,STC2
mut vs wt d702factor 2x q05		PRKD1	-0.906	kinase		-1.573		-0.179	-1.074	0.00116	CCND2,CXCL10,CXCL2,CXCL3,CXCL6,IL1B,IL6,TNFAIP3	CEBPB,Creb,EGR1,ERK1/2,FOS,HSPB1,JUN,NFKB1,NFKBIA,NFkB (complex),P38 MAPK,PPARG,PRKD1,RELA,SP1,STAT3,TP53,ZFP36
mut vs wt d702factor 2x q05		ketoconazole		chemical drug		-1.572		0.154	-1.97	0.000172	ABCC2,CYP1A1,CYP2B6,GSTA2,TAT,UGT1A1,VDR	AHR,CTNNB1,EGR1,FOXA2,JUN,NR1I2,PPARG,RELA,RXRA,SP1,STAT3,dexamethasone,ketoconazole,troglitazone
mut vs wt d702factor 2x q05		D-glucose		chemical - endogenous mammalian		-1.57		-0.06	-1.197	0.000532	ACTA2,ACVR1C,AGTR1,ALDOB,ALDOC,ANXA1,APLN,APOB,B3GNT6,CASP1,CCND2,CDKN1A,CNR1,COL2A1,COL3A1,CTSV,CXCL2,DCN,ERO1A,FBXO32,FST,GALR1,GJA1,HAPLN1,IL1B,IL6,INHBB,ITGA5,ITGA8,KDR,LDHA,NQO1,PCSK1,PCSK1N,PDK1,PLAUR,PLCB1,PPY,SCD,SCUBE3,SERPINB2,SLC2A1,SLC2A2,SNAP25,SPP1,TRPV6,VEGFA	AGT,AHR,CTNNB1,D-glucose,HIF1A,IGF1,IL1B,JUN,LEP,NFKB1,NFKBIA,NFkB (complex),PPARG,RELA,SMAD3,SP1,STAT3,TP53,dexamethasone
mut vs wt d702factor 2x q05		CUX1	0.202	transcription regulator		-1.539		0.007	-1.556	1.68e-05	ARHGDIB,CDH2,CDKN1A,CXCL10,CXCL2,CXCL3,CXCL6,ITGB2,SNAI2,VIM,WNT1,WNT5A	AHR,CUX1,NFKB1,NFKBIA,NFkB (complex),RELA,SMAD3
mut vs wt d702factor 2x q05		IL17A		cytokine		-1.536		-0.134	-0.876	1.32e-05	ACTA2,CD274,CDH2,COL2A1,CRP,CXCL10,CXCL13,CXCL2,CXCL3,CXCL6,DUOX2,IL1B,IL6,IVL,KLF2,LCN2,LOX,NTN1,PRDM1,S100A9,SLC2A1,TNC,TNFAIP3,TNFRSF11A,TYMP,VEGFA,VIM,WFDC12	AHR,C3,CEBPB,CTNNB1,IFNG,IL17A,IL1B,JUN,MYC,NFKBIA,NFkB (complex),RELA,STAT1,STAT3,TNF
mut vs wt d702factor 2x q05		lithium		chemical drug		-1.536		-0.011	-1.506	0.011	ADCY2,ADRA1B,ADRA2A,BDNF,CDKN1A,DPP10,IL6,SSTR2,TACR1
mut vs wt d702factor 2x q05		CD40LG	-1.267	cytokine		-1.533		-0.162	-0.93	0.00398	A4GALT,BATF,CASP1,CCL15,CCR1,CD70,CDKN1A,CFP,CXCL10,CXCL2,CYP1B1,IDO2,IFITM1,IL1B,IL1RAP,IL6,ITGA4,ITGB7,MAPK4,MMP10,PLAUR,PRDM1,PTPRG,TNFAIP3,TNFRSF11A,TNFSF10,TYMP,VEGFA,WNT5A	CD40LG,CEBPB,CTNNB1,FOXO1,FOXO3,IFNG,Interferon alpha,JUN,MYC,NFKB1,NFKBIA,NFkB (complex),PI3K (complex),STAT1,STAT3,TNF
mut vs wt d702factor 2x q05		IL17F	-0.705	cytokine		-1.532		-0.16	-1.185	0.0157	CXCL10,CXCL2,CXCL3,CXCL6,IL6
mut vs wt d702factor 2x q05		N-acetylmuramyl-L-alanyl-D-isoglutamine		chemical - endogenous non-mammalian		-1.528		-0.181	-1.028	0.00106	BDKRB2,CASP1,CD200,CXCL2,CXCL3,DMBT1,IL1B,IL6,ITGB2	CEBPB,CTNNB1,CXCL2,CXCL8,Ccl2,JUN,N-acetylmuramyl-L-alanyl-D-isoglutamine,NFKBIA,NFkB (complex),NOD2,RELA,STAT3,TNF
mut vs wt d702factor 2x q05		DIO3	0.669	enzyme		-1.524		0.026	-1.658	2.27e-08	ADAMTS16,ADAMTS5,ALOX5,F5,FGF11,FST,FXYD6,GREB1,ITGA4,ITGB2,LAPTM5,MC4R,NKX1-2,NPR1,NR5A1,PARVB,PCSK1N,PNMT,PTPRR,SERPINB2,SLC27A6,SLC2A2,SLC9A2,SNED1,STC1,TBX1
mut vs wt d702factor 2x q05		TLR2	0.218	transmembrane receptor		-1.523		-0.112	-1.057	0.000216	ACTA2,CCR1,CD70,CDKN1A,CRP,CXCL10,CXCL2,CXCL3,CXCL6,FBXO32,GJA1,IL1B,IL6,ITGA4,ITGB7,KLF2,PTX3,SCD,TNFSF10,VDR	CEBPB,IL10,JUN,NFKB1,NFKBIA,NFkB (complex),P38 MAPK,Pam3-Cys-Ser-Lys4,RELA,STAT1,STAT3,TLR2,TNF,ZFP36
mut vs wt d702factor 2x q05		JUN	0.04	transcription regulator		-1.522		-0.109	-0.894	2.33e-10	ACP5,ACTA2,ANGPTL2,ANXA1,AR,ARTN,BDNF,CCND2,CD274,CDKN1A,CFP,CHGA,CHST4,CSTA,CXCL10,CXCL3,CYGB,CYP1B1,DIO2,FLNC,FOXC1,FRZB,GAS6,GJA1,GREB1,HPGD,IGFBP3,IGFBP6,IGFBP7,IL1B,IL6,IVL,KDR,MMP10,NQO1,PCSK1,PDK1,PLAUR,POU5F1,PTX3,SAA1,SCD,SERPINB2,SNAI2,SPP1,SULF2,SYK,TF,TNC,UGT1A3,VDR,VEGFA,VIM,WNT5A	CEBPB,EGR1,EP300,ESR2,FOS,FOXM1,HDAC1,IL6,JUN,JUND,MYC,NFKBIA,NFkB (complex),RELA,SMAD3,SP1,STAT3,TNF,TP53
mut vs wt d702factor 2x q05		platelet activating factor		chemical - endogenous mammalian		-1.521		-0.136	-1.128	0.000424	CDH2,CDKN1A,CEACAM5,GAS6,IL6,ITGB2,PLAUR,VEGFA,VIM	CEBPB,CTNNB1,Creb,FOS,FOXO1,FOXO3,HIF1A,IFNG,JUN,MMP9,MYC,NFKB1,NFkB (complex),PI3K (complex),RELA,SP1,SRC,STAT1,STAT3,platelet activating factor
mut vs wt d702factor 2x q05		ATG7	0.112	enzyme		-1.519		-0.011	-1.49	0.00494	ACTA2,CDH2,CYP2A6 (includes others),IL1B,IL6,NQO1,SLC2A1,SNAI2,TET1	ATG7,CTNNB1,Creb,IL17A,JUN,MYC,NFE2L2,NFKB1,NFKBIA,NFkB (complex),RELA,SMAD3,SMAD4,SP1,SQSTM1,STAT1,STAT3,TP53,Tgf beta
mut vs wt d702factor 2x q05		NCOA3	-0.144	transcription regulator		-1.508		-0.156	-1.133	0.0136	CDKN1A,CYP1A1,CYP2B6,IGFBP3,KDR,LDHA,SLC16A3,SLC2A1,VEGFA
mut vs wt d702factor 2x q05		astressin 2B		biologic drug		-1.503		-0.039	-1.417	7.85e-06	CXCL2,HPGD,KCNMA1,SLC2A1,SLC2A3,VEGFA	Akt,EGR1,FOXO1,NFKB1,SMAD3,SP1,astressin 2B
mut vs wt d702factor 2x q05		dextran sulfate		chemical drug		-1.496		-0.12	-1.188	0.0199	ADAMTS1,AGTR1,CHGA,CXCL10,CXCL2,CXCL3,CXCL6,EFEMP2,IL1B,IL6,LCN2,MMP10,MNS1,NQO1,PTN,S100A9,SERPINB2,SLC2A1,UGT1A1,VEGFA
mut vs wt d702factor 2x q05		MYC	-0.173	transcription regulator		-1.491		-0.078	-0.894	0.000661	ADAMTS1,ADAMTS9-AS2,ALOX5,APCDD1,AR,BDNF,CASP1,CCN4,CCND2,CD274,CDH2,CDKN1A,COL14A1,COL2A1,COL3A1,COL5A1,COL8A1,CRABP2,CRYAB,CTSV,CXCL10,DSP,EVPL,FBN2,FBXO32,FMOD,FOXE1,FRZB,FSTL1,GJA1,GREB1,H19,HAPLN1,IL1RAP,KDR,LDHA,LOX,MX2,MYCN,NDRG1,NMI,NQO1,OPRK1,PCDH18,PDK1,PITX2,PLA1A,PLAUR,PNCK,POU5F1,PRDM1,PTN,RGPD4 (includes others),RRM2B,SCD,SLC16A3,SLC22A4,SLC2A1,SLC2A2,SLC2A3,SOX5,SPP1,SRD5A1,TAT,TF,…	Akt,CTNNB1,Creb,EGR1,EP300,ERK1/2,FOS,FOXO1,HDAC1,JUN,JUND,MYC,NFKB1,NFkB (complex),SMAD3,SP1,STAT1,STAT3,TP53
mut vs wt d702factor 2x q05		NFAT5	-0.072	transcription regulator		-1.488		-0.161	-0.895	4.29e-06	AR,B3GAT1,CCN4,CCR1,CD24,CLIC3,CXCL10,CXCL3,IGFBP7,IL1B,IL6,LCN2,PRSS35,SPP1,TNFAIP3,VEGFA	CTNNB1,Ca2+,Creb,EGR1,HDAC1,JUN,MYC,NFAT5,NFKB1,NFKBIA,NFkB (complex),PPARG,RELA,SP1,STAT3,TP53,VEGFA
mut vs wt d702factor 2x q05		NEDD9	0.239	other		-1.488		0.029	-1.569	0.034	ALOX5,CA9,MACROD2,PLOD2,SLC2A1,STC1,TF,VIM
mut vs wt d702factor 2x q05		ALB	-0.691	transporter		-1.487		-0.113	-1.243	0.00242	ACTA2,CDKN1A,CDKN1C,IL1B,IL6,SCD,VEGFA	AHR,ALB,Akt,Creb,EGR1,ESR1,FOS,FOSL1,FOXO1,HIF1A,JUN,JUND,Mapk,NFE2L2,NFKB1,NFKBIA,NFkB (complex),Pkc(s),RELA,SMAD3,SMAD4,SP1,STAT3,TGFB1,TP53
mut vs wt d702factor 2x q05		enterotoxin B		biologic drug		-1.483		-0.196	-0.824	0.000124	BDNF,CXCL10,CXCL13,CXCL2,CXCL3,CXCL6,CXCR6,GPNMB,IL1B,IL6,SRXN1,WT1	CEBPB,IFNG,IL6,JUN,NFKBIA,NFkB (complex),RELA,STAT1,STAT3,TNF,enterotoxin B
mut vs wt d702factor 2x q05		IFNA2		cytokine		-1.478		-0.162	-0.847	0.000331	ALOX5,ANXA1,C1R,CD274,CD70,CDKN1A,CXCL10,CXCL13,EGLN3,ENPP1,IFITM1,IFITM2,IL1B,IL6,MT1F,MX2,NLGN2,NT5E,RIPOR2,SAMD9,SOCS2,TNFSF10,VEGFA	CTNNB1,FOXO3,IFNA2,IFNAR1,IL10,IL2,JUN,MYC,NFKB1,NFKBIA,NFkB (complex),RELA,SMAD3,STAT1,STAT3,STAT4
mut vs wt d702factor 2x q05		TRPV4	-0.326	ion channel		-1.477		-0.164	-1.113	0.00364	COL2A1,CXCL10,CXCL2,CXCL6,IL6	CCL5,CEBPB,CREB1,CXCL2,Ccl2,ERK,IL6,JUN,NFKBIA,NFkB (complex),PPARG,RELA,SMAD3,STAT1,STAT3,TRPV4
mut vs wt d702factor 2x q05		VEGFA	-1.24	growth factor		-1.472		-0.147	-0.782	4.49e-05	ACTA2,ADAMTS1,BATF,CCRL2,CDKN1A,CTSV,CXCL10,CXCL2,CXCL6,FLT4,GJA1,HLX,IL1B,IL6,INPP5D,ITGA4,KDR,MEF2C,MMP10,MYCN,NRGN,RGS5,SFTPC,SNAI2,STC1,TNC,UNC5B,VEGFA,XCL1	AKT1,CEBPB,CTNNB1,Creb,FOXO3,IFNG,IL10,JUN,MMP9,MYC,NFKB1,NFKBIA,NFkB (complex),RELA,SP1,STAT1,STAT3,TP53,VEGFA
mut vs wt d702factor 2x q05		prostaglandin E2		chemical - endogenous mammalian		-1.47		-0.068	-1.166	0.00266	ACTA2,ADAMTS1,CASP1,CCR1,CD274,CDKN1A,CHGA,CXCL10,CXCL3,DCN,FMOD,FST,GCNT1,GJA1,IGFBP7,IL1B,IL6,ITGA5,NT5E,PDE4B,PRDM1,SOCS2,SPP1,VEGFA,VIM	AHR,CTNNB1,FOXO3,IL10,IL1B,IL2,JUN,MYC,NFKB1,NFKBIA,NFkB (complex),RELA,SMAD3,SMAD4,SP1,STAT1,STAT3,TP53,Tgf beta,prostaglandin E2
mut vs wt d702factor 2x q05		trinitrobenzenesulfonic acid		chemical reagent		-1.467		-0.159	-0.865	9.98e-06	ABCC2,BST1,CCR1,COL3A1,CXCL10,CXCL2,CXCL3,CXCL6,IL1B,IL6,LCN2,MMP10,PTX3,S100A9,TACR1	AHR,CEBPB,IFNG,JUN,NFKB1,NFKBIA,NFkB (complex),PPARG,RELA,SMAD3,STAT1,STAT3,trinitrobenzenesulfonic acid
mut vs wt d702factor 2x q05		paclitaxel		chemical drug		-1.464		-0.07	-1.185	0.000139	ABCG2,ACTA2,CACNB3,CD274,CDA,CDKN1A,CRP,CXCL10,CXCL2,CXCL6,CYP1A1,CYP1B1,IGFBP3,IL1B,IL1RAP,IL6,ITGA5,NNAT,NT5E,PLAUR,S100A9,SERPINB2,SLC2A3,SNAI2,STC1,TFAP2A,TUBB1,TYMP	AHR,AR,EGFR,ERK,HIF1A,Hif1,IL17A,JUN,NFKB1,NFKBIA,NFkB (complex),PPARG,RELA,SMAD3,SP1,STAT3,VHL,paclitaxel
mut vs wt d702factor 2x q05		collagenase		group		-1.463		-0.196	-0.912	4.48e-05	CXCL10,CXCL2,CXCL3,CXCL6,IL6,ITGA4,PTX3,SAA1	CEBPB,Gm21596/Hmgb1,IL6,JUN,NFKBIA,NFkB (complex),RELA,STAT3,TNF,Tnf (family),collagenase
mut vs wt d702factor 2x q05		TNF	-1.529	cytokine		-1.461		-0.069	-0.705	1.71e-13	A4GALT,ABCC2,ABCG2,ACP5,ACTA2,ADAMTS5,AGTR1,AKR1B10,ALDH1A3,ALOX15B,ALOX5,ANXA1,APCS,APLN,AR,ARHGDIB,AVPR1A,BDKRB2,BDNF,BGN,BTN3A3,CARD16,CASP1,CCL28,CCN4,CCND2,CCR1,CCR3,CD200,CD274,CD70,CDH2,CDKN1A,CDO1,CH25H,CHST11,CHST2,CHST4,CLDN5,COL16A1,COL2A1,COL3A1,CP,CRP,CRYAB,CTSF,CXCL10,CXCL13,CXCL2,CXCL3,CXCL6,CYP1A1,CYP1B1,DCN,DMBT1,DSC2,EGLN3,FBXO32,FLT4,FOXE1,FOXF2,FRZB,FST,GABRB2,GBP6,GJA1,GNA15,…	AHR,CEBPB,HIF1A,IFNG,IL1B,IL6,JUN,NFKB1,NFKBIA,NFkB (complex),RELA,SMAD3,SMAD4,STAT1,STAT3,TGFB1,TNF,TP53
mut vs wt d702factor 2x q05		PLAUR	-1.043	transmembrane receptor		-1.46		-0.111	-1.219	0.0294	ACTA2,CXCL3,KDR,PLAUR,VIM
mut vs wt d702factor 2x q05		Immunoglobulin		complex		-1.459		-0.018	-1.364	0.00146	ACTA2,APLN,ATP12A,ATP4B,BATF,BDNF,CASP1,CCND2,CD274,CDH2,CDKN1C,CFP,CH25H,CHST2,CLDN8,CXCL10,CXCL13,CXCL2,CXCL3,CXCL6,CYP1B1,DSP,DYSF,ENO2,GAS7,GMPR,HAL,IL1B,IL6,ITGA4,KDR,LCN2,MEF2C,MOXD1,NT5E,PDE3B,PDK1,PDK4,PDLIM4,PRDM1,S100A9,SCD,SLC2A1,SPP1,TNFRSF11A,TYMP,VEGFA	CEBPB,CTNNB1,HIF1A,IL10,IL17A,IL6,Immunoglobulin,JUN,MYC,NFKB1,NFKBIA,NFkB (complex),RELA,SMAD3,SMAD4,STAT1,STAT3,TGFB1,TP53
mut vs wt d702factor 2x q05		FLI1	-1.511	transcription regulator		-1.457		-0.122	-1.191	0.0482	CXCL10,INPP5D,LDHA,LOX,TNC,VEGFA
mut vs wt d702factor 2x q05		ERBB2	-0.033	kinase		-1.456		-0.081	-0.907	2.65e-06	ABCG2,ACTA2,ADAMTS16,ADAMTS5,ADGRL3,ALDOC,ANGPTL2,AR,C4BPB,CADM1,CCND2,CDH2,CDKN1A,CENPF,CHCHD10,CHST2,COL3A1,COL5A1,CPS1,CXCL10,CXCL3,CYP4B1,EMP3,FGF9,FRRS1,FSTL1,FUT11,FXYD3,GAS6,GBP6,GJA1,H19,HES7,IGFBP3,IGFBP6,IL1B,IL6,ITGA5,KDR,LCN2,LDHA,MAN1A1,MAPK4,MFAP2,MMP10,MYCN,NDRG1,NNMT,NT5E,PDK1,PDK4,PDLIM4,PLAUR,PTPRB,SLC1A6,SLC2A1,SLC6A14,SNAI2,SOCS2,SPAG4,ST3GAL2,TNC,TNFAIP3,TNNT3,UGT8,UNC5B,VDR,…	Akt,CTNNB1,EGFR,EGR1,ERBB2,FOS,FOXO1,HDAC1,HIF1A,JUN,JUND,MYC,NFKB1,NFkB (complex),RELA,SMAD3,SP1,STAT1,STAT3,TP53
mut vs wt d702factor 2x q05		ERK1/2		group		-1.453		-0.118	-0.876	5.69e-05	AKR1B10,AKR1C3,ALOX5,APLN,BDNF,CCN4,CCND2,CDKN1A,COL2A1,COL3A1,CTSV,CXCL10,CXCL3,CXCL6,GJA1,H19,HPGD,IGFBP3,IL1B,IL6,MYCN,PFKFB4,PLAUR,PTN,SNAI2,SPP1,TACR1,TYMP,VEGFA	CEBPB,CTNNB1,EGR1,EP300,ERK1/2,FOS,FOSL1,HDAC1,HIF1A,IGF1,JUN,Mapk,NFE2L2,NFKB1,NFKBIA,NFkB (complex),RELA,SMAD3,SP1,STAT3,TNF,TP53
mut vs wt d702factor 2x q05		Ins1		other		-1.45		-0.076	-1.118	0.015	ADH1C,APLN,BDNF,CDKN1A,CRYAB,CYP1A1,FOXE1,GREB1,IGFBP3,IL1B,IL6,LDHA,SCD,SLC2A1,SLC2A2,SNAP25,SOCS2,TAT,TF,UGT8,VEGFA,VIM
mut vs wt d702factor 2x q05		PPARD	0.137	ligand-dependent nuclear receptor		-1.447		-0.062	-1.156	0.00065	ACSL5,ACTA2,ANGPTL3,APOA2,APOB,CCND2,CYP2B6,GAS6,IGFBP6,IL13RA2,IL1B,IL6,LDHA,LIPG,MYOM2,OAF,PCSK9,PDK1,PDK4,SCD,SLC2A2,TUB,VEGFA	CREBBP,EP300,GW501516,JUN,NCOA2,NFKBIA,NFkB (complex),NR1H3,PPARD,PPARG,RARA,RARB,RELA,RXRA,SREBF1,STAT3,THRB,TP53,linoleic acid
mut vs wt d702factor 2x q05		IKBKB	0.005	kinase		-1.446		-0.12	-0.893	0.000676	CCR1,CCR3,CDKN1A,CH25H,CP,CTSF,CXCL10,CXCL2,CXCL3,CXCL6,CYP1B1,DCN,FOXF2,IGFBP6,IGFBP7,IL1B,IL6,LCN2,PTX3,SERPINB2,SOCS2,TNC,TNFAIP3,VEGFA,ZNF395	CEBPB,CHUK,FAS,IKBKB,IKBKG,JUN,NFKB1,NFKBIA,NFkB (complex),RELA,SMAD3,STAT1,STAT3,TNF,TP53
mut vs wt d702factor 2x q05		TCR		complex		-1.436		-0.124	-1	0.0312	APOD,BATF,CCR1,CCR3,CD200,CD70,CXCL10,CXCL13,F5,IL6,ITGB7,KLF2,MX2,MYCN,PDE3B,PRDM1,SEMA3A,SLC2A1,SLC2A3,SOCS2,SPP1,TNFAIP3,VDR,XCL1
mut vs wt d702factor 2x q05		TGFB1	-0.042	growth factor		-1.435		-0.063	-0.76	1.05e-15	ABCC2,ABCG2,ABLIM3,ACTA2,ADGRG2,ADRA2A,AK1,AKR1C1/AKR1C2,ALDOB,ALOX5,ANKH,APLN,APOB,BDKRB2,BDNF,BGN,C1R,C4BPB,CADM1,CASP1,CCN4,CCND2,CCR1,CCR3,CCRL2,CD274,CD300A,CDH2,CDHR1,CDKN1A,CDKN1C,CEACAM5,CENPF,CHST11,CLCA2,CNN3,COL16A1,COL2A1,COL3A1,COL5A1,COL8A1,CORIN,CRP,CXCL10,CXCL13,CXCL2,CXCL3,CXCR6,CYP1A1,DCN,DEPTOR,DMTN,DPYSL3,DSC2,DSP,ELMO1,ENO2,ENPP1,F5,FGF9,FGFBP1,FOXC1,FXYD6,GABRB2,GAS7,GCNT1,G…	AHR,AR,CEBPB,HIF1A,Hif1,IL1B,JUN,NFKBIA,NFkB (complex),PPARG,RELA,SMAD3,SMAD4,SMAD7,SP1,STAT3,TGFB1,TNF,TP53,Tgf beta,VHL
mut vs wt d702factor 2x q05		PEBP1	0.299	other		-1.435		-0.037	-1.353	0.0322	CXCL2,CXCL3,IL6,IVL,SCD
mut vs wt d702factor 2x q05		TNC	-1.205	other		-1.432		-0.084	-1.246	0.00048	CASP1,CDKN1A,COL2A1,CXCL3,CXCL6,IL1B,IL6,MSI1	CEBPB,Creb,EGR1,ERK1/2,FOS,IL6,ITGA5,JUN,NFKB1,NFKBIA,NFkB (complex),P38 MAPK,RELA,SP1,STAT3,TNC,ZFP36,prostaglandin E2
mut vs wt d702factor 2x q05		mir-204		microrna		-1.432		-0.033	-1.36	0.00275	BDNF,CHRD,CHRM2,CXCL2,FOXC1,IL1B,IL6,SNAP25	FOXO1,HDAC1,HIF1A,Histone h3,KMT2A,MED1,PPARGC1A,RELA,RNA polymerase II,SIRT1,SP1,mir-204
mut vs wt d702factor 2x q05		CEBPD	-0.375	transcription regulator		-1.431		-0.099	-1.175	0.00384	CDKN1A,CDKN1C,CTSV,CXCL3,CYP1A1,CYP2A6 (includes others),IL1B,IL6,IVL,SLC5A12,SNAI2	AR,CEBPD,CREBBP,CTNNB1,Creb,ESR1,ESR2,HIF1A,Hif1,JUN,NCOA2,NFKBIA,NFkB (complex),PPARG,PRL,PTGS2,RELA,RXRA,STAT3,STAT5B,TP53,VHL
mut vs wt d702factor 2x q05		dopamine		chemical - endogenous mammalian		-1.422		-0.074	-1.18	0.0195	BDNF,CNR1,FST,GPRC5B,GRM4,IL6,KCND2,NMU,NPR3,OPRK1,PDE10A,SSTR2
mut vs wt d702factor 2x q05		DKK1	-0.496	growth factor		-1.42		0.105	-1.694	0.00968	ACTA2,BDNF,CDKN1A,LEF1,SNAI2,TNNT2,WNT11,WNT5A	AHR,Akt,CTNNB1,DKK1,EGR1,FOXM1,FOXO1,JUN,LEF1,MYC,NFKB1,RUNX2,SMAD3,SMAD4,SP1,STAT3,TCF,dexamethasone
mut vs wt d702factor 2x q05		CTNNB1	0.124	transcription regulator		-1.419		-0.121	-0.602	5.32e-14	ACTA2,ADGRG2,ALDH1A3,ANXA1,APCDD1,APOD,AR,BDNF,BGN,CA9,CADM1,CCN4,CCND2,CD274,CDH2,CDKN1A,CER1,CHGA,CLDN5,CNR1,COL2A1,CRABP2,CTHRC1,CTNNA2,CTSF,CXCL2,CXCL6,CYP1A1,CYP1A2,CYP1B1,CYP2A6 (includes others),DIO2,ELMO1,ENO2,ENPP1,FGF9,FGFBP1,FOXC1,FST,GJA1,GLI3,GPX2,HAPLN1,HES7,HSD17B2,IFITM1,IL1B,IL6,INHA,INHBB,ITGA4,ITGB2,ITGB7,KDR,KIFC1,LEF1,LIMD2,LMX1B,MMP23B,MTMR7,MYCN,NES,NTN1,PDE4B,PITX2,PLAUR,P…	CEBPB,CTNNB1,FOS,FOXM1,GLI1,JUN,JUND,MYC,NFkB (complex),P38 MAPK,SMAD1,SMAD2,SMAD3,SMAD4,SP1,STAT3,TCF,TP53,ZFP36
mut vs wt d702factor 2x q05		dimethyl sulfoxide		chemical drug		-1.416		-0.115	-1.008	0.00132	ABCC2,ALOX5,ANXA1,CCND2,CYP1A1,CYP2B6,EMP3,FRZB,IL1B,ITGB2,LCN2,MEF2C,NPPB,PTH1R	AHR,CEBPB,CXCL8,FOS,HIF1A,IL1B,IL6,JUN,MAPK8,MYC,NFKBIA,NFkB (complex),RELA,SMAD3,SP1,SRC,STAT3,dimethyl sulfoxide
mut vs wt d702factor 2x q05		Gm21596/Hmgb1		transcription regulator		-1.412		-0.164	-1.047	0.00435	CXCL3,CXCL6,H19,IL1B,IL6	AHR,Creb,EGR1,ERK1/2,FOS,Gm21596/Hmgb1,IKBKB,IL1B,NFKB1,NFKBIA,NFkB (complex),PPARG,RELA,SMAD3,SP1,STAT3,TP63
mut vs wt d702factor 2x q05		MAPK9	0.192	kinase		-1.411		-0.084	-1.143	0.0236	CACNB3,CD70,CDKN1A,CYP1A1,DIO2,IL1B,IL6,NMI,PLA1A,PTX3,SCD,TNFAIP3,VDR
mut vs wt d702factor 2x q05		Foxp1		transcription regulator		-1.406		0.005	-1.416	0.000655	CNR1,DAB1,GJA1,HOPX,MYCN,PDPN,SCGB1A1,SFTPC
mut vs wt d702factor 2x q05		MSTN	0.585	growth factor		-1.402		-0.003	-1.391	5.97e-06	ACTA2,CDKN1A,CTSV,FBXO32,IGFBP3,IL6,INHBB,MEF2C,SLC2A1,SPP1,TNC,VEGFA,VIM	AHR,Akt,CREB1,CTNNB1,EGR1,FOXO1,FSH,HIF1A,IGF1,JUN,LEP,MSTN,NFKB1,NFkB (complex),PPARG,SMAD3,SMAD4,SMAD7,SP1,STAT3
mut vs wt d702factor 2x q05		SMARCA2	0.345	transcription regulator		-1.4		-0.096	-1.19	0.0274	CP,CXCL13,IL6,KDR,MEF2C,MMP10,VDR
mut vs wt d702factor 2x q05		PTGS1	-0.066	enzyme		-1.4		-0.053	-1.283	0.0322	GJA1,IL1B,IL6,STC1,VEGFA
mut vs wt d702factor 2x q05		TRAF3IP2	-0.533	other		-1.396		-0.167	-0.882	0.00103	CCR3,COL3A1,CXCL10,CXCL2,CXCL3,CXCL6,IL1B,IL6,LCN2,MMP10	CEBPB,CXCL2,IKBKB,IL17A,IL6,JUN,NFKB1,NFKBIA,NFkB (complex),RELA,SMAD3,STAT3,TP53,TP63,TRAF3IP2
mut vs wt d702factor 2x q05		salmonella minnesota R595 lipopolysaccharides		chemical - endogenous non-mammalian		-1.394		-0.196	-0.693	0.00198	CCRL2,CH25H,CXCL10,CXCL13,CXCL2,CXCL3,CXCL6,IL1B,IL6,PDE4B,SERPINB2,TFEC,TNFAIP3	CEBPB,Creb,EGR1,ERK1/2,FOS,JUN,NFKB1,NFKBIA,NFkB (complex),P38 MAPK,PPARG,RELA,SP1,STAT3,TNF,TP53,ZFP36,salmonella minnesota R595 lipopolysaccharides
mut vs wt d702factor 2x q05		1810019D21Rik		other		-1.387		0.07	-1.638	9.28e-07	AK5,BDKRB2,CDKN1A,COL8A1,EDA2R,F5,FST,IL13RA2,INKA2,ITGB2,MYCN,SNAI2,ZNF365
mut vs wt d702factor 2x q05		GAS2L3	-0.911	other		-1.387		0.196	-1.821	0.000411	CCND2,CDKN1A,PVT1,TM4SF1,ZMAT3
mut vs wt d702factor 2x q05		TFPI2	0.988	other		-1.387		-0.145	-1.066	0.00247	CXCL10,CXCL2,DIO2,IL6,SYT4	C3,CTNNB1,Creb,JUN,MMP9,NFKB1,NFkB (complex),RELA,TFPI2
mut vs wt d702factor 2x q05		YBX1	0.182	transcription regulator		-1.387		-0.076	-1.217	0.02	ACTA2,CDKN1A,CXCL2,IGFBP3,INHA,PAPPA,PDK1,SLC2A3,STC2
mut vs wt d702factor 2x q05		TGFB2	0.252	growth factor		-1.38		-0.078	-1.101	0.000463	ACTA2,COL3A1,FMOD,KDR,LIPG,PDK4,PLOD2,SCD,SNAI2,SPP1,TMEFF1,VDR,VEGFA,WNT11	AHR,CTNNB1,FGF2,FOS,HIF1A,JUN,JUND,MYC,NFkB (complex),PPARG,RELA,RXRA,SMAD3,SMAD4,SMAD7,SP1,STAT3,TGFB1,TGFB2,TP53
mut vs wt d702factor 2x q05		ERN1	0.034	kinase		-1.379		-0.102	-1.116	0.0168	CXCL2,CYP1A2,CYP1B1,ERO1A,IFITM1,IL1B,IL6,SCD,SCN3A,SERPINB2,TCN1,VEGFA
mut vs wt d702factor 2x q05		RAC1	0.033	enzyme		-1.377		-0.137	-0.909	0.000463	ACP5,ACTA2,CDH2,COL2A1,CRP,IL1B,IL6,MMP10,NPPB,PLAUR,SNAI2,SOX5,VEGFA,WNT5A	CEBPB,CREB1,CTNNB1,FN1,FOS,ICAM1,JUN,MAPK8,MYC,NFKB1,NFKBIA,NFkB (complex),NOTCH1,RAC1,RELA,SMAD3,SP1,STAT1,STAT3
mut vs wt d702factor 2x q05		IL2	-1.343	cytokine		-1.376		-0.118	-0.758	0.00125	ANXA1,CASP1,CCND2,CCR1,CCR3,CD274,CDKN1A,CDKN1C,CFP,CXCL10,CXCL3,CXCR6,CYP1A1,CYP1A2,CYP2B6,GCNT1,IL1B,IL6,ITGA4,ITGB7,JAML,LAPTM5,NDRG1,NMI,NRGN,NT5E,PDE3B,PDE4B,PDLIM4,PLCB1,PRDM1,RGCC,RGPD4 (includes others),SLC2A3,SOCS2,SPP1,STC2,TNFRSF10C,TNFRSF11A,TNFSF10,VEGFA,VIM,WT1,XCL1	BCL3,CEBPB,CSF2,IL10,IL2,IL4,IL6,Immunoglobulin,JUN,NFKB1,NFKBIA,NFkB (complex),NR4A1,RELA,SP1,STAT1,STAT3,TP53
mut vs wt d702factor 2x q05		NR3C2	0.239	ligand-dependent nuclear receptor		-1.373		-0.049	-1.218	0.00218	ADAMTS1,CNN3,COL3A1,CXCL6,CYP1B1,IL1B,IL6,KDR,LCN2,MMP10,PTX3,SYT2,TNNT3,VEGFA	AHR,AR,CTNNB1,ESR1,FOXO1,JUN,MYC,NFKB1,NFKBIA,NFkB (complex),NR1I2,NR3C2,PGR,PPARG,RELA,SP1,STAT3,dexamethasone,estrogen receptor,medroxyprogesterone acetate,progesterone,spironolactone
mut vs wt d702factor 2x q05		SNAI2	1.641	transcription regulator		-1.372		-0.047	-1.22	8.67e-05	AR,CDH2,CDKN1A,COL2A1,DSP,HPGD,MEF2C,NES,SNAI2,VDR,VIM	AR,CTNNB1,Creb,EGR1,ERK1/2,FOS,HIF1A,MMP9,MYOCD,NFKB1,NFkB (complex),NOTCH1,RELA,RUNX2,SMAD3,SNAI2,SP1
mut vs wt d702factor 2x q05		F2RL1	0.002	g-protein coupled receptor		-1.369		-0.142	-1.002	0.00567	ACTA2,BDNF,CXCL2,GBP6,IL1B,IL6,SERPINB2,VEGFA	AHR,CCL5,CEBPB,CREB1,CSF1,CTNNB1,Ca2+,Creb,F2RL1,IL1B,JUN,NFATC1,NFKBIA,NFkB (complex),P38 MAPK,RELA,SP1,STAT1,STAT3,TP53,ZFP36
mut vs wt d702factor 2x q05		pyrophosphate		chemical - endogenous mammalian		-1.364		0.098	-1.583	7.02e-06	ANKH,COL2A1,ENPP1,SPP1,WNT5A	CTNNB1,JUND,NFATC1,NFATC2,NFkB (complex),WNT5A,pyrophosphate
mut vs wt d702factor 2x q05		NOD2	-0.902	other		-1.364		-0.172	-0.883	0.00413	CXCL10,CXCL2,CXCL3,DMBT1,IL1B,IL6,KLF2,PDE4B,TNFAIP3	AHR,C5,CXCL2,Creb,IL17A,N-acetylmuramyl-L-alanyl-D-isoglutamine,NFKB1,NFKBIA,NFkB (complex),NOD2,PYCARD,RELA,SMAD3,STAT3
mut vs wt d702factor 2x q05		MET	-0.263	kinase		-1.357		-0.106	-0.992	6.3e-05	CCND2,CD274,CDH2,CDKN1A,CTSV,FBXO32,HLX,IL1B,IL6,LEF1,PAPPA,POU5F1,SH3BP5,SLA,SPP1,VEGFA,VIM	AKT1,Akt,CEBPB,CTNNB1,EGR1,FOS,FOXO1,FOXO3,HIF1A,ITGB1,JUN,MET,MYC,NFKB1,NFkB (complex),PI3K (complex),SMAD3,SP1,SRC,STAT3,TP53
mut vs wt d702factor 2x q05		TNFSF12	-0.379	cytokine		-1.355		-0.059	-1.133	4.84e-05	BST1,CCR1,CXCL10,CXCL2,CXCL3,CXCL6,FBXO32,IL1B,IL6,MEF2C,MMP10,PTX3,S100A9,SIX1,SIX2	CEBPB,Ccl2,IFNG,IL10,JUN,NFKB1,NFKBIA,NFkB (complex),RELA,STAT1,STAT3,TNFSF12,TP53
mut vs wt d702factor 2x q05		IRAK4	-0.417	kinase		-1.347		-0.117	-1.118	0.0192	CXCL10,CXCL2,CXCL3,CXCL6,IL1B,IL6,PDE4B,TNFAIP3
mut vs wt d702factor 2x q05		SKP2	-0.7	other		-1.346		-0.012	-1.319	0.00286	CCND2,CDH2,CDKN1A,POU5F1,SLC2A1,VIM	ATF4,Akt,CDK9,CTNNB1,EGR1,EP300,FOXM1,FOXO1,GATA4,GLI1,JUN,MYC,NFKB1,NFkB (complex),RNA polymerase II,SKP2,SMAD2,SMAD3,SMAD4,SP1,STAT1,STAT3,TP53
mut vs wt d702factor 2x q05		CTR9	0.152	other		-1.342		-0.036	-1.262	0.00247	CLCA2,CYP1A1,GREB1,PLAAT2,TIAM1
mut vs wt d702factor 2x q05		Collagen type II		complex		-1.342		-0.015	-1.308	0.0105	CRP,CXCL2,CXCL3,IL1B,IL6,TNFSF10
mut vs wt d702factor 2x q05		PIK3CA	-0.065	kinase		-1.342		-0.02	-1.298	0.0123	CA9,CDH2,KDR,PDK1,POU5F1,SNAI2,TNFSF10,VIM
mut vs wt d702factor 2x q05		IGF2BP1	-0.11	translation regulator		-1.342		-0.053	-1.222	0.0139	BCL11A,CDKN1A,COL14A1,COL5A1,TNC
mut vs wt d702factor 2x q05		C11orf95-RELA		fusion gene/product		-1.342		-0.196	-0.904	0.0489	CXCL10,CXCL2,CXCL3,IL6,TNFAIP3
mut vs wt d702factor 2x q05		arsenite		chemical toxicant		-1.337		-0.089	-1.109	4.49e-07	ADAMTS16,CDH2,CDKN1A,COL8A1,CXCL3,CYP1A1,CYP1B1,CYP2B6,FST,IL1RAP,INHBB,KLF2,NQO1,PLCB1,PTPRG,SFRP4,SNAI2,TACR1,VEGFA	AHR,AKT1,AR,ARNT,CEBPB,ESR1,ESR2,FOXO1,FOXO3,HIF1A,Hif1,JUN,KLF2,NFkB (complex),PPARG,RARA,RELA,SHC1,SP1,STAT3,TP53,VHL,arsenite,estrogen receptor
mut vs wt d702factor 2x q05		ciprofibrate		chemical drug		-1.332		0.008	-1.363	0.00146	ADAMTS1,APCS,APOB,CCND2,CPS1,CRP,CTSV,CYP1A2,FAH,HAL,IL1RAP,LCN2,PDK4,SCD,SLC4A4	AHR,Ahr-aryl hydrocarbon-Arnt,CEBPA,EP300,IL1B,JUN,LEP,MED1,NFE2L2,NFKB1,NFKBIA,NFkB (complex),NR1I3,PPARG,RELA,RNA polymerase II,SP1,SREBF1,STAT3,VitaminD3-VDR-RXR,cholesterol,ciprofibrate,estrogen receptor
mut vs wt d702factor 2x q05		HDAC3	0.113	transcription regulator		-1.329		0.037	-1.411	0.0028	ALOX5,CDH2,CDKN1A,CXCL10,CXCL2,IL6,PRDM1,SCD,SPP1,TBX1,VIM	HDAC1,HDAC3,HIF1A,Hdac,Histone h3,Histone h4,JUN,KMT2A,MED1,NFKB1,NFKBIA,NFkB (complex),PPARG,RELA,RNA polymerase II,RXRA,SMAD3,SMAD4,SP1,STAT3,TGFB1,TP53
mut vs wt d702factor 2x q05		PDGFB	-0.948	growth factor		-1.317		-0.091	-1.104	0.0204	ACTA2,IL6,KLF2,RGS5,SPP1,TNC,VEGFA
mut vs wt d702factor 2x q05		FN1	0.022	enzyme		-1.315		-0.112	-0.844	0.002	ACP5,ACTA2,CDH2,CDKN1A,CRP,CXCL2,CXCL3,IL1B,IL6,ITGA4,ITGA5,NES,NPPB,PLAUR,POU5F1,SLC2A1,SNAI2,SPP1,VIM	AHR,CTNNB1,FN1,HIF1A,JUN,MYC,NFKB1,NFkB (complex),RAC1,RELA,SMAD3,SMAD4,SMAD7,SP1,STAT1,STAT3,TGFB1,TP53,Tgf beta
mut vs wt d702factor 2x q05		TFAP2C	-0.048	transcription regulator		-1.308		0.023	-1.36	0.00453	CDKN1A,FMN1,FOXC1,FREM2,FST,GREB1,MT1F,PITX2,TNFAIP3	ESR1,ESR2,JUN,RARA,TFAP2C,TP53,estrogen receptor
mut vs wt d702factor 2x q05		LCN2	2.005	transporter		-1.302		-0.067	-1.087	0.000389	CCR1,CDH2,CXCL10,CXCL13,CXCL2,CXCL3,CXCL6,IL1B,IL6,SCD,SPP1,VIM	AHR,AKT1,CEBPB,CTNNB1,Creb,EGR1,ERK1/2,FOS,FOXO3,JUN,LCN2,MET,NFKB1,NFKBIA,NFkB (complex),PPARG,RELA,SMAD3,SP1,STAT3,TP53
mut vs wt d702factor 2x q05		MAPKAPK2	-0.054	kinase		-1.302		-0.103	-1.036	0.0104	CD70,CXCL10,CXCL3,IL1B,IL6,PLA1A,SLA
mut vs wt d702factor 2x q05		SATB2	0.491	transcription regulator		-1.294		-0.024	-1.227	0.00076	CXCL10,ENPP1,ITGA8,MFAP2,NNMT,PDE3A,PIEZO2,SPP1
mut vs wt d702factor 2x q05		CGA	-0.617	other		-1.289		0.004	-1.301	0.00481	ADAMTS1,AR,BDNF,CCR3,CLDN5,CTSV,NNAT,NR5A1,SFRP4,UGT1A1,ZNF385B	AR,CGA,CREB1,CTNNB1,Creb,FOXO3,FSH,JUN,NFkB (complex),SMAD3,testosterone
mut vs wt d702factor 2x q05		beta-estradiol		chemical - endogenous mammalian		-1.288		-0.056	-0.641	2.49e-15	A4GALT,ABCG2,ACOX2,ACP5,ACTA2,ADAMDEC1,ADAMTS1,ADAMTS5,ADGRG2,ADH1C,ADIRF,AGTR1,ANKH,ANXA1,APCDD1,APOD,AR,ASB2,ATP12A,BATF,BDNF,BMP5,CCND2,CCR1,CCR3,CD24,CD274,CDH2,CDKN1A,CDKN1C,CENPF,CFAP97D2,CHGA,CHRM3,CKB,CLCA2,CLDN8,CNR1,COCH,COL3A1,CP,CRABP2,CRP,CTNNA2,CXCL10,CXCL13,CXCL2,CXCL3,CYP1A1,CYP1B1,CYP2A6 (includes others),CYP2B6,CYP4B1,DCLK1,DCN,DMBT1,DMTN,DSP,DUOX2,FAM3D,FBLN1,FGF9,FGFBP1,FMOD,F…	AGT,AHR,AR,ESR1,ESR2,FOS,IL1B,JUN,JUND,MYC,NFKB1,NFKBIA,NFkB (complex),NR1I2,PGR,RELA,SMAD3,SP1,STAT3,TP53,beta-estradiol,progesterone
mut vs wt d702factor 2x q05		TIFA	-0.839	other		-1.287		-0.117	-1.026	0.000293	CASP1,CXCL10,CXCL3,IL6,TNFAIP3	CEBPB,IKBKG,IL6,JUN,NFKB1,NFKBIA,NFkB (complex),PPARG,RELA,STAT1,STAT3,TIFA,TNF,TP53
mut vs wt d702factor 2x q05		HOXA-AS2	-3.828	other		-1.279		-0.018	-1.244	0.000852	CDKN1A,HOXA3,KLF2,TNFSF10
mut vs wt d702factor 2x q05		TAC1	-1.1	other		-1.266		-0.171	-0.798	0.034	CASP1,CXCL10,CXCL3,IL1B,IL6,KCND2,SERPINB2,TACR1
mut vs wt d702factor 2x q05		E. coli lipopolysaccharide		chemical - endogenous non-mammalian		-1.259		-0.179	-0.764	0.0133	CXCL10,CXCL2,CXCL3,CXCL6,IL1B,IL6,S100A9,TF
mut vs wt d702factor 2x q05		E. coli B5 lipopolysaccharide		chemical - endogenous non-mammalian		-1.252		-0.095	-0.791	0.000145	ADAMTS1,ADH1C,CCR1,CD274,CDKN1A,CXCL10,CXCL13,CXCL2,CXCL3,CXCL6,CXCR6,IL13RA2,IL1B,IL1RAP,IL6,INHBB,PDE4B,PRDM1,PRDM16,SOCS2,SPP1,TAT,TNFAIP3,VEGFA,XCL1	AHR,CTNNB1,E. coli B5 lipopolysaccharide,IL10,IL1B,JUN,MYC,NFKB1,NFKBIA,NFkB (complex),PPARG,RELA,SMAD3,STAT1,STAT3
mut vs wt d702factor 2x q05		(+)-MK-801		chemical drug		-1.25		-0.05	-1.114	0.0192	ABCC2,BDNF,CACNB3,CDKN1A,GJA1,GJA5,GJC1,SSTR2
mut vs wt d702factor 2x q05		TLR7	0.077	transmembrane receptor		-1.249		-0.191	-0.504	0.000416	CD274,CD300A,CD70,CDKN1A,CXCL10,CXCL13,CXCL2,CXCL3,DIO2,GNG2,IFITM1,IL1B,IL6,INPP5D,KCNMA1,MUSK,MX2,PTX3,RGS4,SPRED3,TNFAIP3	AHR,IL22,Interferon alpha,MYD88,NFKB1,NFKBIA,NFkB (complex),RELA,SMAD3,STAT1,STAT3,TLR7,resiquimod
mut vs wt d702factor 2x q05		HNRNPU	-0.265	transporter		-1.239		-0.157	-0.938	0.00763	IL1B,IL6,POU5F1,SPP1
mut vs wt d702factor 2x q05		SMPD1	0.79	enzyme		-1.235		-0.111	-0.891	5.87e-05	ACTA2,CCL28,CCR3,CCRL2,CXCL2,IL6,SLC2A2,SLIT2,TNFSF10,TYMP	AHR,CEBPB,FAS,IL1B,IL6,JUN,NFE2L2,NFKB1,NFKBIA,NFkB (complex),PPARG,RELA,SMPD1,SREBF1,STAT3,cholesterol
mut vs wt d702factor 2x q05		TLR1	0.504	transmembrane receptor		-1.235		-0.196	-0.85	0.00922	IL1B,IL6,TNFAIP3,VDR	AHR,CEBPB,CTNNB1,FOXO1,FOXO3,IL1B,MYD88,NFKB1,NFKBIA,NFkB (complex),PI3K (complex),RELA,STAT1,STAT3,TLR1,TLR2,peptidoglycan
mut vs wt d702factor 2x q05		TUG1	-0.172	other		-1.235		0.094	-1.419	0.0152	BDNF,IL6,KLF2,NES
mut vs wt d702factor 2x q05		IL17RA	-0.561	transmembrane receptor		-1.234		-0.147	-0.853	5.69e-05	CCL28,CCR1,CXCL2,CXCL3,CXCL6,IL1B,IL6,S100A9	AHR,C/EBP,CTNNB1,IL17A,IL17RA,IL1B,JUN,MAP3K7,MYC,NFE2L2,NFKBIA,NFkB (complex),RELA,SMAD3,STAT1,STAT3,TRAF3IP2
mut vs wt d702factor 2x q05		CSHL1		growth factor		-1.233		-0.08	-0.999	0.00119	ACTA2,AR,CYP2B6,ONECUT1,SLC2A1,SOCS2,SRD5A1,SSTR2,TOX	AHR,Akt,CSHL1,EGR1,FOXO1,GHR,NFKB1,NFKBIA,NFkB (complex),RELA,SMAD3,SP1,STAT1,STAT3,STAT5A,STAT5B,TP53
mut vs wt d702factor 2x q05		C5		other		-1.231		-0.168	-0.859	0.000562	CXCL2,CXCL3,IL1B,IL6,ITGB2	C5,CEBPB,CTNNB1,Creb,EGR1,ERK1/2,FOS,IL6,JUN,MAPK14,MYC,NFKB1,NFKBIA,NFkB (complex),RELA,SP1,STAT1,STAT3,TNF,TP53,TP73
mut vs wt d702factor 2x q05		EBF2	-0.079	transcription regulator		-1.231		-0.196	-0.797	0.00364	DIO2,ENTPD2,LGI1,RBM46,SFRP4
mut vs wt d702factor 2x q05		bromodeoxyuridine		chemical drug		-1.23		-0.188	-0.741	0.00699	CD70,CXCL10,IFITM1,IGFBP3,IL1B,IL6,TNFSF10	CTNNB1,HDAC1,Histone h3,JUN,KMT2A,MED1,MYC,NAMPT,NFKBIA,NFkB (complex),RELA,RNA polymerase II,SIRT1,SMAD3,SP1,STAT1,STAT3,TP53,bromodeoxyuridine
mut vs wt d702factor 2x q05		CTSB	0.027	peptidase		-1.225		-0.131	-0.868	1.14e-05	ACTA2,CTSV,CXCL2,CXCL3,IL1B,KDR,PLAUR,VEGFA	AHR,CASP1,CTNNB1,CTSB,Creb,EGR1,FN1,IL1B,JUNB,NFKB1,NFKBIA,NFkB (complex),PLAU,PYCARD,RELA,SMAD3,SP1,STAT1,STAT3,STAT4,TP53,VEGFA
mut vs wt d702factor 2x q05		WNT11	1.617	other		-1.225		-0.155	-0.918	0.00818	CCN4,ENO2,POU5F1,RSPO2,TNNT2
mut vs wt d702factor 2x q05		GATA4	-0.86	transcription regulator		-1.219		-0.051	-1.008	6.41e-07	AGTR1,COL3A1,CORIN,CRABP2,CTHRC1,CXCL2,CXCL6,CXCR6,DIO2,EVPL,GJA1,GJA5,IL6,INHA,INHBB,ITGB1BP2,KCNJ2,MEF2C,NPPB,NR5A1,PRDM1,PTPRB,SFTPC,SPP1,TNNT2,VIM	GATA4,MEF2C,NFKBIA,NFkB (complex),NKX2-5,TBX5
mut vs wt d702factor 2x q05		CHD4	0.162	enzyme		-1.219		0.142	-1.59	0.0136	BCL11A,CDA,CDKN1A,DUOX2,SFRP4,SMOC1,SYDE1
mut vs wt d702factor 2x q05		P2RX7	0.696	ion channel		-1.217		-0.152	-0.922	0.013	CXCL10,IL1B,IL6,TNFSF10
mut vs wt d702factor 2x q05		PTHLH	-0.479	other		-1.215		-0.096	-0.95	0.000223	ADAMTS1,AR,CDKN1A,COL2A1,HAPLN1,IL6,IVL,LEF1,TNC,VDR,VEGFA	AKT1,AR,Akt,CEBPB,CTNNB1,Ca2+,Creb,EGR1,EP300,FOXO1,FOXO3,JUN,NFKB1,NFkB (complex),PTHLH,SMAD3,SOX9,SP1,STAT3,TP53,VEGFA
mut vs wt d702factor 2x q05		SMARCA4	0.025	transcription regulator		-1.212		-0.163	-0.035	3.83e-12	ABLIM3,ACSL5,ACTA2,ALDH1A3,ANGPTL2,ARHGDIB,ATP6V1B1,BATF,BEND5,C2CD6,C6orf141,CARD16,CASP1,CCR1,CCRL2,CDKN1A,CFP,CLIC2,CP,CPS1,CXCR6,CYB5R2,CYP1A1,CYP4B1,DUSP13,DYSF,EMP3,FGF9,FGFBP1,GPR158,HPGD,IFITM1,IFITM2,IGFBP7,IL1B,IL6,ITGA5,KCNJ2,KDR,LEF1,LINC00589,LOX,LOXL2,MC4R,MEF2C,NTNG1,PAEP,PCSK9,PDE4B,PDK1,PITX2,PLAUR,PON3,POU5F1,PTX3,SERPINB2,SFTPC,SOCS2,SPP1,SYK,TMCC3,TNFRSF10C,TNFSF10,TNNT2,TNNT3…	CD44,CTNNB1,HDAC1,Hdac,Histone h4,JUN,MED1,MYC,NFkB (complex),RELA,RNA polymerase II,SMAD2,SMAD3,SMARCA4,SP1,STAT1,STAT3,TP53
mut vs wt d702factor 2x q05		hemozoin		chemical - endogenous non-mammalian		-1.211		-0.196	-0.74	0.00121	CCR1,CXCL2,CXCL3,IL1B,IL6,S100A9	AHR,CEBPB,CXCL8,IL10,IL1B,IL6,JUN,NFKB1,NFKBIA,NFkB (complex),RELA,STAT3,TNF,hemozoin
mut vs wt d702factor 2x q05		PF4	0.217	cytokine		-1.21		-0.09	-0.978	0.0155	ACTA2,CDKN1A,CXCL3,IL1B,IL6,MYCN,TNFAIP3,VDR
mut vs wt d702factor 2x q05		LHCGR	-0.144	g-protein coupled receptor		-1.199		-0.12	-0.965	0.0218	ADAMTS1,AR,CTSV,INHA,INHBB
mut vs wt d702factor 2x q05		TRADD	0.31	other		-1.195		-0.168	-0.825	0.00605	AR,CXCL2,CXCL3,IL6,TNFAIP3	HDAC3,IFNB1,IKBKB,JUN,NFKB1,NFKBIA,NFkB (complex),PPARG,RELA,SMAD3,STAT1,STAT3,TNFRSF1A,TP63,TRADD
mut vs wt d702factor 2x q05		deferoxamine		chemical drug		-1.194		-0.099	-0.679	5.49e-08	APLN,BDNF,CA9,CCND2,CD300A,CDKN1A,CP,EGLN3,GAS7,IGFBP3,IL6,ITGB2,ITGB7,LCN2,LDHA,MX2,MYCN,NDRG1,PLAUR,SLC2A1,SLC2A14,SLC2A3,SPP1,SULF2,TNFSF10,VDR,VEGFA,WT1	AR,CTNNB1,Creb,EGR1,EP300,EPAS1,ERK1/2,FOS,FOXO1,FOXO3,HDAC1,HIF1A,Hif1,JUN,MYC,NFKB1,PI3K (complex),PPARG,RNA polymerase II,SP1,STAT3,TP53,VHL,deferoxamine
mut vs wt d702factor 2x q05		Akt		group		-1.194		-0.06	-0.843	6.13e-08	ACTA2,AR,CCND2,CD274,CDH2,CDKN1A,CDKN1C,COL2A1,COL3A1,CP,CXCL10,FBXO32,FUT11,HPGD,IL1B,IL6,KIRREL1,LCN2,LEF1,MSI1,MYCN,NDRG1,NES,NT5E,PDK4,POU5F1,PRDM16,PTN,PTX3,SCD,SEMA6D,SLC2A1,SLC6A14,SNAI2,SPP1,TNC,TNFRSF11A,TNFSF10,UGT8,VEGFA,WT1	AHR,AKT1,AR,Akt,CEBPB,EGFR,EGR1,EP300,FOXO3,HDAC1,HIF1A,JUN,NFkB (complex),RELA,SIRT1,SMAD3,SMAD4,SMAD7,SP1,STAT3,TP53
mut vs wt d702factor 2x q05		L-triiodothyronine		chemical - endogenous mammalian		-1.194		-0.079	-0.783	0.00272	ADAMTS5,AKR1C3,ANGPTL3,APOA2,APOB,AR,CDKN1A,CNR1,DIO2,FUOM,IGFBP3,IGFBP6,IL6,INHA,LCN2,MC4R,MYOM3,NEUROG3,NPPB,NRGN,NT5E,NTNG1,PDK4,PFKFB4,PITX1,PITX2,PRDM16,PTH1R,SCD,SLC2A2,SLC46A3,TF,TIAM1	CTNNB1,FOXO1,HIF1A,IGF1,JUN,L-triiodothyronine,LEP,NCOA2,NFKB1,NFkB (complex),NR1H3,PPARD,PPARG,PPARGC1A,RARA,RARB,RXRA,SIRT1,SMAD3,SP1,STAT3,THRB
mut vs wt d702factor 2x q05		S100A9	2.272	other		-1.189		-0.062	-0.957	0.00099	ADAMTS1,ADAMTS5,APLN,CASP1,CD274,CP,CXCL10,CXCL3,ENTPD2,H19,IL1B,IL6,KCNMA1,ROBO2,S100A9,SIX1,WT1	CEBPB,Creb,EGR1,ERK1/2,FOS,IL22,IL6,JUN,NFKB1,NFKBIA,NFkB (complex),PPARG,RELA,S100A8,S100A9,SP1,STAT1,STAT3
mut vs wt d702factor 2x q05		BAPTA-AM		chemical reagent		-1.189		0.14	-1.522	0.0173	BDNF,CDKN1A,CXCL10,CYP1A1,IL6,SOCS2
mut vs wt d702factor 2x q05		IFNAR1	-0.048	transmembrane receptor		-1.188		-0.121	-0.856	0.00129	CD274,CGAS,CH25H,CXCL10,CXCL13,CXCL2,CXCL3,CXCL6,IFITM1,IL1B,IL6,KLK12,MX2,RIPOR2,TNFAIP3,TNFSF10	CTNNB1,HDAC3,IFNAR1,IFNB1,IL17A,Interferon alpha,JUN,MYC,NFKB1,NFKBIA,NFkB (complex),RELA,SMAD3,STAT1,STAT3
mut vs wt d702factor 2x q05		lysophosphatidic acid		chemical - other		-1.179		-0.147	-0.623	1.9e-05	ACTA2,CXCL10,CXCL2,CXCL3,IL13RA2,IL1B,IL6,KDR,LIPG,NPPB,PLAUR,TF,VEGFA,VIM,WNT5A	CASP1,CTNNB1,FN1,FOS,JUN,JUNB,JUND,MYC,NFKB1,NFKBIA,NFkB (complex),PPARG,PYCARD,RELA,SMAD3,SP1,STAT1,STAT3,TP53,lysophosphatidic acid
mut vs wt d702factor 2x q05		arotinoid acid		chemical toxicant		-1.176		-0.117	-0.947	0.0232	CDKN1A,CNR1,PLTP,SCD
mut vs wt d702factor 2x q05		ADAMTS12	-0.043	peptidase		-1.172		0.196	-1.605	0.00435	ALDH1A3,CXCL10,IL6,LCN2,S100A9
mut vs wt d702factor 2x q05		IL32	-0.272	cytokine		-1.169		-0.114	-0.875	0.00275	CASP1,CXCL3,IL1B,IL6,ITGB2,SNAI2,ULBP2,VIM	CEBPB,CXCL8,Creb,IFNG,IL32,JUN,NFKB1,NFKBIA,NFkB (complex),P38 MAPK,PPARG,RELA,STAT1,STAT3,ZFP36,prostaglandin E2
mut vs wt d702factor 2x q05		CXCL2	-1.2	cytokine		-1.161		-0.171	-0.796	0.000411	CXCL10,CXCL2,CXCL3,IL1B,IL6	AHR,CEBPB,CREB1,CXCL2,ERK,ICAM1,JUN,NFKB1,NFKBIA,NFkB (complex),NOTCH1,P38 MAPK,PPARG,RELA,SMAD3,STAT3,ZFP36
mut vs wt d702factor 2x q05		HTT	0.081	transcription regulator		-1.159		-0.04	-1.019	0.000441	ACTA2,ADAM23,ADAMTS5,ALDOC,BDNF,C1R,CASP1,CCN4,CDKN1A,CNR1,COCH,COL16A1,CPLX2,CRYAB,DCN,DIO2,EMP3,ENO2,FXYD6,GAS7,GJC1,HUNK,KCNC3,KCNJ2,KCNQ2,LDHA,LOX,MAN1A1,MEIS2,MFAP4,MMP10,NEFL,OPRK1,PCP4,PDE10A,PDE4B,PDK1,PDLIM4,PLAUR,PLCB1,RGS4,SCN4B,SLC2A1,SNAP25,SOCS2,SPP1,ST3GAL2,TIAM1,TM4SF1,TNNT3	APOE,BDNF,CREB1,CTNNB1,EGR1,EP300,FOS,HDAC1,HTT,JUN,MAPK8,MEF2C,MYC,NFKB1,NFkB (complex),RELA,SMAD3,SP1,STAT3,TP53
mut vs wt d702factor 2x q05		BMP4	-0.014	growth factor		-1.156		-0.114	-0.628	7.16e-06	ABCG2,ACTA2,CDKN1A,COCH,COL2A1,DIO2,GJA1,HOPX,IL6,ITGA4,KDR,KRT23,LEF1,LEFTY1,MYCN,NES,PITX2,POU5F1,SALL3,SNAI2,TFAP2A,VEGFA,WNT5A,XAGE2,ZFP42	AR,BMP4,CTNNB1,DKK1,EP300,FOS,FOSL1,JUN,LEF1,Mapk,NFE2L2,NFKB1,NFkB (complex),NOTCH1,RUNX2,SMAD1,SMAD2,SMAD3,SMAD4,SP1,STAT3,TP53
mut vs wt d702factor 2x q05		ST6GAL1	-0.252	enzyme		-1.15		-0.196	-0.715	1.52e-05	CCND2,IL6,PDK1,SLC2A1,SLC2A3	AR,Akt,EGFR,EGR1,FN1,FOXO1,GLI1,HIF1A,Hif1,JUN,LGALS1,NFKB1,NFKBIA,NFkB (complex),PPARG,RELA,SMAD3,SP1,ST6GAL1,STAT3,VHL
mut vs wt d702factor 2x q05		THRB	-0.923	ligand-dependent nuclear receptor		-1.14		-0.02	-1.057	0.000141	ANGPTL3,APOA2,CASP1,CCN4,CCND2,CCR1,CXCL10,CXCL2,CXCL3,DCN,FRZB,FSTL1,GJA5,IGFBP3,IL6,KCNMA1,LEF1,MC4R,NPPB,NRGN,PDK4,PITX2,SFRP4,SPP1,TNFSF10,WNT11	AKT1,CEBPB,FOXO1,FOXO3,JUN,L-triiodothyronine,NCOA2,NFkB (complex),NR1H3,P38 MAPK,PPARG,PPARGC1A,RARA,RARB,RELA,RXRA,SP1,STAT3,THRB,TP53,ZFP36
mut vs wt d702factor 2x q05		puromycin aminonucleoside		chemical reagent		-1.138		-0.087	-0.793	4.08e-06	ABCC2,ADAMTS1,ANXA1,CP,CTSV,CYP2B6,EFEMP2,EMP3,GPNMB,GPX2,LCN2,NES,PLA1A,PRTFDC1,SLC34A2,SPP1,VIM	FOS,HIF1A,JUN,MYC,SP1,SRC,puromycin aminonucleoside
mut vs wt d702factor 2x q05		CCL5	-0.311	cytokine		-1.138		-0.18	-0.624	0.000455	BDNF,CCR1,CCR3,CCRL2,CXCL2,CXCL3,CYP1B1,IL1B,IL6,PLAUR,SERPINB2	ARRB2,CCL5,CEBPB,CTNNB1,Ccl2,IFNG,JUN,NFKBIA,NFkB (complex),P38 MAPK,RELA,STAT1,STAT3,TNF,TP53,ZFP36
mut vs wt d702factor 2x q05		CSF1	0.089	cytokine		-1.137		-0.13	-0.542	0.000128	ACP5,CCND2,CCR1,CDKN1A,CFP,CXCL2,CXCL3,CXCL6,GAS7,GPNMB,IL1B,IL6,ITGA4,ITGA5,KLF2,LDHA,PTPRZ1,SALL3,SERPINB2,SLC16A3,SLC2A1,SPP1,TNFAIP3,TNFRSF11A,VEGFA	BCL3,CEBPB,CSF1,CSF2,FN1,IFNG,IL10,JUN,NFKB1,NFKBIA,NFkB (complex),PPARG,RELA,SMAD3,SP1,STAT1,STAT3,TP53
mut vs wt d702factor 2x q05		LLGL2	-0.025	other		-1.134		-0.196	-0.616	0.000216	FSTL1,GAS6,ITGB2,NDRG1,SLIT2,TNNT2,TNS1
mut vs wt d702factor 2x q05		EPHB4	-0.353	kinase		-1.134		-0.131	-0.789	0.00774	BMP5,KDR,NEFL,POU5F1,WNT11,WNT5A,ZFP42
mut vs wt d702factor 2x q05		methapyrilene		chemical drug		-1.134		0.019	-1.183	0.0358	ALDOB,APOA2,CP,CPS1,CRP,CTSV,CXCL3,KYNU,PLCB1,SCD,SULT1A1
mut vs wt d702factor 2x q05		POU2F2	-0.659	transcription regulator		-1.134		-0.196	-0.616	0.0403	ALDOC,ALOX5,COCH,MOCOS,PFKFB4,SCD,SPP1,SSTR2
mut vs wt d702factor 2x q05		cycloheximide		chemical reagent		-1.132		0.025	-1.282	1.69e-08	ADRA1B,AGTR1,APOB,AR,BDNF,CCR1,CDKN1A,COL2A1,COL5A1,CXCL10,CXCL2,CXCL3,CYP1A1,CYP1A2,CYP2B6,DIO2,FST,GAS7,GJA1,GREB1,IGFBP6,IL1B,IL6,KCND2,KCND3,LARP6,LCN2,LDHA,MYCN,NQO1,PLAUR,PNMT,PRDM1,PTX3,SCD,SERPINB2,SLC2A1,SPP1,TNFAIP3,TNFSF10,VDR,VEGFA	AHR,CEBPB,EGR1,EP300,HDAC1,IL1B,JUN,NFKB1,NFKBIA,NFkB (complex),P38 MAPK,PPARG,RELA,SMAD3,SP1,STAT3,TNF,TP53,ZFP36,cycloheximide
mut vs wt d702factor 2x q05		HMGB2	-0.924	transcription regulator		-1.131		-0.065	-1.002	0.000654	COL2A1,CXCL2,GLI3,IL1B,IL6,MMP10	ESR1,ESR2,FOS,HMGB2,JUN,NFKB1,STAT3
mut vs wt d702factor 2x q05		PAX4	-2.23	transcription regulator		-1.131		-0.125	-0.885	0.00124	INSM1,NEUROG3,SNAI2,VIM
mut vs wt d702factor 2x q05		Lymphotoxin		complex		-1.131		-0.196	-0.744	0.011	CXCL10,CXCL13,IL1B,IL6
mut vs wt d702factor 2x q05		CEACAM1	0.31	transporter		-1.131		-0.05	-1.032	0.0267	CXCL6,KDR,NES,ULBP2,VEGFA
mut vs wt d702factor 2x q05		KLF1	0.269	transcription regulator		-1.131		-0.107	-0.919	0.0452	BCL11A,CDKN1A,DMTN,SLC22A4,SLC2A1
mut vs wt d702factor 2x q05		CpG oligonucleotide		chemical drug		-1.124		-0.136	-0.686	0.0236	CA9,CCR1,CD274,CXCL10,CXCL2,GBP6,GRM4,IL1B,IL6,INPP5D,SLC2A3,SYK,TNFSF10
mut vs wt d702factor 2x q05		TAF4B	0.761	transcription regulator		-1.121		-0.196	-0.745	0.000654	CCND2,FST,INHA,INHBB,SPP1,TNFAIP3
mut vs wt d702factor 2x q05		NR5A2	-0.784	ligand-dependent nuclear receptor		-1.121		-0.102	-0.792	0.000821	ABCC2,CDKN1A,CFP,CPA1,CRP,CXCL10,IL1B,IL6,INHA,ONECUT1,POU5F1,RGS4,SAA1	C3,CEBPA,CEBPB,FOS,Histone h3,IL1R1,JUN,JUND,KMT2A,MED1,MYC,NFKB1,NFkB (complex),NR5A2,PPARG,RELA,RNA polymerase II,SP1,STAT1,TP53
mut vs wt d702factor 2x q05		ALK	-2.039	kinase		-1.121		-0.131	-0.87	0.00308	CCND2,CD274,MYCN,POU5F1	ALK,Akt,CTNNB1,EGR1,FOS,FOXO1,JUN,JUND,MYC,NFKB1,NFkB (complex),SMAD3,SP1,STAT1,STAT3,TP53
mut vs wt d702factor 2x q05		POSTN	0.855	other		-1.118		-0.113	-0.822	0.00029	ACTA2,LOX,LOXL1,LOXL2,MEF2C,PTN,SPP1,VIM	Akt,EGR1,FN1,FOXO1,FOXO3,NFKB1,NFkB (complex),NOTCH1,POSTN,PTK2,RELA,SMAD3,SP1,STAT3,TP53,Vegf
mut vs wt d702factor 2x q05		lipid A		chemical toxicant		-1.118		-0.186	-0.631	0.00276	CGAS,CXCL10,CXCL3,IL1B,IL6,ITGA5,SYK	CEBPB,CXCL2,Ccl2,IL1A,JUN,LBP,NFKBIA,NFkB (complex),RELA,SMAD3,STAT1,STAT3,lipid A
mut vs wt d702factor 2x q05		PLAU	0.265	peptidase		-1.114		-0.086	-0.834	0.000151	ACTA2,CXCL3,GJA1,IL1B,IL6,KDR,PLAUR,PTN,S100A9,SLC2A1,VIM	CTNNB1,Creb,EGFR,EGR1,EP300,FN1,Gm21596/Hmgb1,HDAC1,HIF1A,JUN,MYC,NFkB (complex),PLAU,RELA,SMAD3,SP1,STAT1,STAT3,TP53,nicotine
mut vs wt d702factor 2x q05		IL5	-2.394	cytokine		-1.114		-0.186	-0.205	0.000309	ACP5,ALDOC,CCND2,CCR1,CCR3,CCRL2,CD24,CDKN1A,CYP1A2,EGLN3,ERO1A,GLIPR2,HLX,ITGB7,NDRG1,P4HA1,PCP4,PDE4B,PDK1,PRDM1,RIPOR2,SLC16A3,SLC2A1,SOCS2,TUBB2B,VIM	BCL3,CEBPB,CSF2,CTNNB1,ERK,IFNG,IL5,JUN,MYC,NFkB (complex),PPARG,RELA,SMAD3,SP1,STAT1,STAT3,STAT5A,STAT5B,TP53
mut vs wt d702factor 2x q05		LMX1B	-1.762	transcription regulator		-1.109		-0.178	-0.714	0.00032	COL2A1,CORIN,PTX3,SIM2,SLIT2,WNT1
mut vs wt d702factor 2x q05		BMP		group		-1.109		-0.065	-0.965	0.000654	IL6,KDR,LMX1B,SPP1,WNT1,WT1	BMP,NFKB1,NFKBIA,NFkB (complex),PPARG,RELA,STAT3
mut vs wt d702factor 2x q05		SB-431542		chemical reagent		-1.101		0.051	-1.31	1.87e-05	ACTA2,BGN,CHRM3,CXCL13,CYP1A1,FST,GJA1,IGFBP7,IL1RAP,LEFTY1,PITX2,POU5F1,PTX3,SERPINB2,SNAI2,SPP1,TNFSF10	AHR,AR,CEBPB,ESR1,JUN,NFkB (complex),NR1I2,P38 MAPK,PGR,RELA,SB-431542,SMAD2,SMAD3,SMAD4,SMAD7,SP1,STAT3,STK11,TP53,ZFP36,progesterone
mut vs wt d702factor 2x q05		peptidoglycan		chemical - endogenous non-mammalian		-1.097		-0.156	-0.586	0.00276	CD200,CD274,CXCL10,CXCL2,CXCL3,CXCL6,IL1B,IL6,ITGB2,S100A9,SSTR2,VDR	AHR,CEBPB,Ccl2,IL17A,IL1B,JUN,NFKB1,NFKBIA,NFkB (complex),P38 MAPK,RELA,SMAD3,STAT3,TLR2,ZFP36,peptidoglycan
mut vs wt d702factor 2x q05		PRMT1	0.053	enzyme		-1.094		-0.159	-0.711	0.0227	CDH2,CXCL3,IGFBP6,POU5F1,SNAI2,VIM
mut vs wt d702factor 2x q05		Ige		complex		-1.093		-0.147	-0.402	0.00446	ALOX5,ANXA1,ASB2,CCND2,CDKN1A,CHST11,CXCL2,CXCL3,ELMO1,ENO2,FXYD6,IL1B,IL6,ITGA5,PIGZ,PTPRG,PTX3,SCD,SERPINB2,SPP1,TNC,TNFSF10,VDR,VIM,XCL1	BCL3,CEBPB,CSF2,FN1,FOS,IL4,Ige,JUN,JUND,MYC,NFKBIA,NFkB (complex),RELA,SMAD3,SP1,STAT1,STAT3,TNF,TP53
mut vs wt d702factor 2x q05		CRYAB	1.409	other		-1.091		0.059	-1.206	0.00605	COL2A1,CRYAB,FBXO32,IL6,VEGFA	CRYAB,FOXO1,FOXO3,HDAC1,JUN,MYC,NFKB1,NFKBIA,NFkB (complex),NOTCH1,PPARG,RELA,SP1,STAT3,TP53,Vegf
mut vs wt d702factor 2x q05		1-chloro-2,4-dinitrobenzene		chemical drug		-1.091		-0.179	-0.74	0.0152	IL1B,IL6,MMP10,NQO1
mut vs wt d702factor 2x q05		NFKBIB	0.696	transcription regulator		-1.091		-0.061	-0.971	0.0268	CTSV,CXCL2,IL1B,IL6,TNFSF10,VEGFA
mut vs wt d702factor 2x q05		DEF6	-0.444	other		-1.086		-0.087	-0.913	0.00623	CDH2,PRDM1,SNAI2,VIM	DEF6,IL17A,JUN,NFKB1,NFKBIA,NFkB (complex),RAC1,RELA,SMAD3,STAT3
mut vs wt d702factor 2x q05		NOTCH3	-0.603	transcription regulator		-1.07		-0.157	-0.596	4.03e-05	ACTA2,APOD,CDKN1A,CDKN1C,COL5A1,KDR,MSI1,PTX3,RGS5,SNAI2,VEGFA	AHR,Akt,CEBPB,EGR1,ERK,FOXO1,NFKB1,NFKBIA,NFkB (complex),NOTCH3,PPARG,RELA,SMAD3,SP1,STAT3
mut vs wt d702factor 2x q05		dimethylnitrosamine		chemical toxicant		-1.069		-0.136	-0.717	0.000562	ACTA2,CDKN1A,COL3A1,CRP,IL1B,IL6,NQO1,VIM	ALB,CEBPB,CTNNB1,Collagen type I (complex),F2,FOXO3,HIF1A,JUN,NFKB1,NFKBIA,NFkB (complex),PPARG,RELA,RUNX2,SMAD2,SQSTM1,STAT3,TNF,dimethylnitrosamine
mut vs wt d702factor 2x q05		LTBR	0.244	transmembrane receptor		-1.069		-0.133	-0.775	0.0173	ACTA2,BST1,COCH,CXCL13,IL6,PDPN
mut vs wt d702factor 2x q05		MSX2	0.08	transcription regulator		-1.067		-0.086	-0.897	0.00443	ABCG2,CDH2,LEF1,PTH1R,SPP1,VIM	AR,CTNNB1,FOXM1,HIF1A,JUN,MSX2,MYOCD,NFkB (complex),NOTCH1,PPARG,RELA,RUNX2,RXRA,SMAD3,SMAD4,STAT3,TCF
mut vs wt d702factor 2x q05		CCL3	0.709	cytokine		-1.067		-0.162	-0.747	0.0203	CCR1,IL1B,IL6,ITGA5
mut vs wt d702factor 2x q05		UXT	0.245	transcription regulator		-1.067		0.135	-1.334	0.0458	ENO2,F5,HPGD,TNFAIP3
mut vs wt d702factor 2x q05		TXNRD1	0.724	enzyme		-1.066		0.131	-1.456	8.28e-05	ABCC2,ACOX2,CYP2B6,GPX2,MOCOS,NQO1,SCD,SLC2A1,SRXN1
mut vs wt d702factor 2x q05		trovafloxacin		chemical drug		-1.066		-0.075	-0.843	0.00231	CDKN1A,CXCL2,CXCL3,IL6,PDE4B,SOCS2,TAT,TNFAIP3,VEGFA	AHR,CEBPB,IFNG,IL18,IL1B,JUN,NFKB1,NFKBIA,NFkB (complex),RELA,STAT1,STAT3,STAT4,TNF,trovafloxacin
mut vs wt d702factor 2x q05		ANXA7	-0.001	ion channel		-1.066		-0.077	-0.837	0.00256	ALOX15B,CDH2,CRABP2,FGF9,FST,SIM2,SLA,SLC2A2,WT1
mut vs wt d702factor 2x q05		PI3K (complex)		complex		-1.061		-0.135	-0.437	1.81e-06	APLN,CCND2,CCR1,CD274,CDH2,CDKN1A,CHGA,CXCL10,FBXO32,GJA1,H19,IL1B,IL6,INHA,ITGB2,KDR,KLF2,LCN2,LEF1,MEF2C,MMP10,NEUROG3,NQO1,PRDM1,SEMA6D,SPP1,TNFAIP3,TNFRSF11A,TNFSF10,TYMP,VEGFA,WT1	Akt,CEBPB,CTNNB1,EGR1,FOXO1,HDAC1,Hdac,Histone h3,Histone h4,JUN,KMT2A,LY294002,MED1,NFKB1,NFKBIA,NFkB (complex),PI3K (complex),RELA,RNA polymerase II,SMAD3,SP1,STAT3,TNF
mut vs wt d702factor 2x q05		PKM	-0.479	kinase		-1.053		-0.101	-0.765	0.00312	CDH2,ENO2,IL1B,IL6,LDHA,PDK1,PDK4,SLC2A1,SNAI2	AR,CTNNB1,EGFR,ERBB2,HIF1A,Hif1,JUN,MYC,NFKB1,NFkB (complex),PKM,PPARG,RELA,SMAD2,SMAD3,SMAD4,SP1,STAT1,STAT3,TP53,VHL
mut vs wt d702factor 2x q05		diethylstilbestrol		chemical drug		-1.045		-0.086	-0.615	9.52e-15	ABCG2,ADGRD1,ADH1C,ALDH1A3,AR,ARHGDIB,ATP12A,CD200,CDKN1A,CENPF,CRABP2,CXCL6,CYGB,CYP2A6 (includes others),CYRIA,DCLK1,DCN,FBLN1,FGFBP1,FMOD,FRZB,GLRX,GREB1,IGFBP3,IGFBP6,INHA,INHBB,KDR,LARP6,MAGEL2,MFAP2,MFAP4,MNS1,MOXD1,NR5A1,OLFML2A,PRDM1,RGS4,RGS5,SERPINB2,SIX1,SLC6A14,SOCS2,TF,VDR,VEGFA,VIT,WNT5A	AR,CEBPB,CREB1,CTNNB1,Creb,EGF,ERBB2,ESR1,ESR2,FOXO3,FSH,JUN,NFKB1,NFkB (complex),RARA,SMAD3,SP1,STAT3,TP53,diethylstilbestrol,estrogen receptor,testosterone
mut vs wt d702factor 2x q05		HAND2	0.063	transcription regulator		-1.045		-0.116	-0.706	4.24e-06	ADSS1,COL3A1,CXCL2,CXCL6,CXCR6,GJA1,GJA5,GLI3,IL6,ITGB1BP2,NPPB,PTPRB,TNNT2
mut vs wt d702factor 2x q05		TICAM1	-0.024	other		-1.044		-0.184	-0.418	0.00873	CCRL2,CH25H,CXCL10,CXCL13,CXCL2,CXCL3,CXCL6,IL1B,IL6,PDE4B,TFEC,TNFAIP3,TNFSF10	HDAC3,IFNB1,JUN,MAP3K7,MYD88,NFE2L2,NFKB1,NFKBIA,NFkB (complex),RELA,SMAD3,STAT1,STAT3,TICAM1,TRAF3
mut vs wt d702factor 2x q05		Mek		group		-1.034		-0.066	-0.773	0.000383	A4GALT,ABCG2,CCND2,CD200,CDH2,CDKN1A,CRYAB,CXCL10,FGFBP1,FUT11,IL1B,IL6,IVL,KDR,KIRREL1,NES,NPPB,NQO1,NT5E,PIWIL1,POU5F1,SLC2A1,SLC6A14,ST3GAL2,TET1,TNFAIP3,UGT8,UNC5B,VIM	Akt,CTNNB1,EGFR,EGR1,EP300,FN1,FOXM1,FOXO1,GLI1,HDAC1,HIF1A,JUN,Mek,NFKB1,NFkB (complex),RELA,SMAD3,SP1,STAT3,TP53
mut vs wt d702factor 2x q05		oxazolone		chemical reagent		-1.029		-0.158	-0.616	4.59e-05	CXCL10,CXCL3,IL1B,IL6,KDR,SAA1,SLIT2	IL18,JUN,NFKB1,NFKBIA,RELA,STAT4,oxazolone
mut vs wt d702factor 2x q05		cyclic AMP		chemical - endogenous mammalian		-1.027		-0.125	-0.386	3.14e-05	ACTA2,ADRA2A,BDNF,CCND2,CDH2,CDKN1A,CHGA,CPS1,CRYAB,CYP2A6 (includes others),DUOX2,ENO2,GJA1,IGFBP3,IL1B,IL6,INHA,KDR,MMP10,NR5A1,PDE4B,PNMT,SERPINB2,TAT,TF,TNFSF10,TPH1	AR,CEBPB,CREBBP,CTNNB1,Creb,ESR1,ESR2,FOS,FOXO1,FOXO3,JUN,JUND,MYC,NCOA2,NFKB1,NFKBIA,NFkB (complex),NR1I2,PGR,PI3K (complex),SP1,STAT3,TNF,TP53,cyclic AMP,progesterone
mut vs wt d702factor 2x q05		MRTFB	-0.397	transcription regulator		-1.026		-0.085	-0.732	0.00242	ACTA2,ADAMTS1,AK5,CD24,COL3A1,CXCL6,HPGD,ITGA5,LCN2,LOXL1,PCDH18,S100A9,SERPINB2,SULT1E1,TUBB1,YPEL1
mut vs wt d702factor 2x q05		Tnf (family)		group		-1.022		-0.109	-0.592	1.99e-05	ADAMTS5,CXCL10,CXCL3,CYP1A1,CYP1A2,CYP2B6,FBXO32,FST,GJA1,GJA5,IL1B,IL6,KDR,LCN2,NT5E,SAA1,TACR1,TNFAIP3,TYMP	AHR,Creb,IL1,JUN,NFKB1,NFKBIA,NFkB (complex),PPARG,RELA,SMAD3,STAT3,TNFRSF1A,Tnf (family),prostaglandin E2
mut vs wt d702factor 2x q05		Hdac		group		-1.019		0.014	-1.084	1.85e-07	ADAMTS1,ADGRL3,AGTR1,BDNF,CDKN1A,CRABP2,FBXO32,HPGD,IGFBP3,IL1B,IL6,ITGA8,LRP2,LRP4,MT1F,MYCN,ONECUT1,ROBO2,RRM2B,SIM2,SMO,SPP1,TNFSF10,WT1	CEBPB,CTNNB1,EGR1,EP300,FOS,HDAC1,Hdac,Histone h3,Histone h4,JUN,KMT2A,MED1,NFKB1,NFkB (complex),RARB,RELA,RNA polymerase II,RXRA,SMAD3,SP1,STAT1,TP53
mut vs wt d702factor 2x q05		Usp17la (includes others)		peptidase		-1.016		-0.196	-0.625	0.00922	ABCG2,IL1B,IL6,POU5F1	NFKB1,NFKBIA,NFkB (complex),RELA,STAT3,TRAF3,Usp17la (includes others)
mut vs wt d702factor 2x q05		FSHR	1.402	g-protein coupled receptor		-1.013		-0.12	-0.75	5.87e-05	AR,ESPN,IGFBP3,INHA,INHBB,MSI1,NPR3,PLA1A,VEGFA,ZNF519	CREB1,CTNNB1,FSH,FSHR,JUN,NFkB (complex),SMAD3
mut vs wt d702factor 2x q05		nitrofurantoin		chemical drug		-1.01		-0.025	-0.902	2.82e-05	ABCC2,ADAMTS1,APOA2,COL2A1,CP,CPS1,CRP,CTSV,CXCL10,CXCL3,GPNMB,GPX2,IGFBP3,IL1B,IL6,LOX,NQO1,SLC34A2,SPP1,VEGFA
mut vs wt d702factor 2x q05		D-fructose		chemical - endogenous mammalian		-1.01		-0.157	-0.599	0.000655	ACTA2,COL3A1,CXCL10,CXCL2,IL1B,IL6,SCD,SLC2A2	CEBPB,D-fructose,IFNG,JUN,LEP,NFKB1,NFKBIA,NFkB (complex),PPARG,SP1,STAT1,STAT3,TNF
mut vs wt d702factor 2x q05		CSF2	1.877	cytokine		-1.01		-0.153	-0.246	0.000786	ACP5,ALOX5,ANXA1,CARD16,CASP1,CCND2,CCR1,CCRL2,CD101,CD24,CDKN1A,CHST11,COL8A1,CXCL10,CXCL2,CXCL3,EFEMP2,IDO2,IL1B,IL6,INPP5D,ITGA4,LDHA,LY9,MNS1,PDE4B,PLAUR,RGCC,RIPOR2,RRM2B,SLAMF7,SLC2A1,SLC2A3,SOCS2,SPP1,TF,TNFAIP3,TNFRSF11A,VDR	CEBPB,CISH,CSF2,IL10,IL4,Interferon alpha,JUN,MYC,NFKB1,NFKBIA,NFkB (complex),RELA,SP1,STAT1,STAT3,TNF,TP53
mut vs wt d702factor 2x q05		CpG ODN 1668		chemical reagent		-1.01		-0.16	-0.628	0.0365	CD200,CXCL10,CXCL3,IL1B,IL6,PRDM1
mut vs wt d702factor 2x q05		IL1A	-0.903	cytokine		-1.004		-0.137	-0.249	3.05e-08	ABCC2,ADAMTS1,ADAMTS5,ALDH1A3,APOD,BTN3A3,CD274,CDKN1A,CXCL10,CXCL2,CXCL3,CXCL6,CYP1A1,CYP1A2,CYP2B6,IL1B,IL6,ITGA5,LCN2,LDHA,LOX,MMP10,PTX3,S100A9,SAA1,SAA2,SPP1,SSTR2,TNFAIP3,VIM,WFDC12,WNT5A	AHR,CEBPB,CHUK,IL1A,IL6,JUN,NFKB1,NFKBIA,NFkB (complex),PPARG,RELA,SMAD3,STAT3,TNF
mut vs wt d702factor 2x q05		vancomycin		biologic drug		-1.002		-0.058	-0.732	9.52e-06	ADAMTS1,AK1,ANXA1,APOD,CFP,CP,CXCL2,EFEMP2,EMP3,GAS6,GPNMB,GPX2,LCN2,PLA1A,PRTFDC1,PTPRZ1,RTN4RL1,SCD,SLC34A2,SOCS2,SPP1,TNFRSF11A,VIM	Ige,JUN,NFATC2,NFKBIA,NFkB (complex),RELA,vancomycin
mut vs wt d702factor 2x q05		TGFB3	-0.504	growth factor		-1		-0.143	-0.446	7.55e-06	ACTA2,CDH2,CDKN1A,COL2A1,COL3A1,COL5A1,GJA1,LEF1,MAPK11,MMP10,PLAUR,PLOD2,SCD,SNAI2,TNC,TNS1,VEGFA	AHR,AR,CTNNB1,Creb,EGR1,ERK1/2,FGF2,FOS,JUN,MYC,NFKB1,NFkB (complex),SMAD2,SMAD3,SMAD4,SMAD7,SP1,STAT3,TGFB3
mut vs wt d702factor 2x q05		GSR	0.453	enzyme		-1		0.152	-1.457	1.49e-05	ABCC2,ACOX2,CYP2B6,GPX2,MOCOS,NQO1,SCD,SLC2A1,SRXN1
mut vs wt d702factor 2x q05		TMPRSS2-ERG		fusion gene/product		-1		-0.014	-0.945	0.000123	ART4,COL5A1,CSAG1,CSAG2/CSAG3,CSTA,DYSF,GPRC5B,IGFBP6,KLF11,KRT23,LOXL2,MAGEA12,MAPK11,SAMD9,STC2,VIM
mut vs wt d702factor 2x q05		dydrogesterone		chemical drug		-1		0.157	-1.313	0.000561	AKR1C1/AKR1C2,AKR1C3,HSD17B2,SRD5A1
mut vs wt d702factor 2x q05		NOS1	-0.766	enzyme		-1		-0.105	-0.746	0.000654	BDNF,FBXO32,IL1B,IL6,PDK1,SLC2A1	BCL2,CTNNB1,Creb,EGR1,ERK1/2,FOS,GLI1,NFE2L2,NFKB1,NFKBIA,NFkB (complex),NOS1,PPARG,RELA,SP1,STAT3,TP53,XDH,heme
mut vs wt d702factor 2x q05		FGFR1	0.022	kinase		-1		-0.1	-0.671	0.00238	ADAMTS5,CCND2,CDKN1A,COL3A1,IL6,PCSK1,PITX1,PLAUR,SLC2A2,VIM,WNT1	CTNNB1,Creb,EGR1,ERK1/2,FGF2,FGFR1,FOS,HIF1A,Histone h3,JUN,KMT2A,MED1,MYC,NFKB1,NFkB (complex),RELA,RNA polymerase II,SP1,SRC,STAT1,STAT3
mut vs wt d702factor 2x q05		MESP1	-0.202	transcription regulator		-1		-0.196	-0.608	0.00396	FOXC1,MEF2C,MEIS2,SNAI2
mut vs wt d702factor 2x q05		KLK5	-0.119	peptidase		-1		-0.196	-0.608	0.00501	CXCL2,IL1B,IL6,S100A9	F2RL1,Ige,JUN,KLK5,NFATC2,NFKB1,NFKBIA,NFkB (complex),RELA,SMAD2,SP1,TNC
mut vs wt d702factor 2x q05		biochanin A		chemical toxicant		-1		0.022	-1.044	0.00922	ACP5,CXCL10,CYP1A1,SULT1E1
mut vs wt d702factor 2x q05		GNAI3	-0.062	enzyme		-1		-0.196	-0.608	0.011	CXCL3,IL6,SPP1,VEGFA
mut vs wt d702factor 2x q05		DSCAML1	0.527	other		-1		-0.091	-0.726	0.0145	DCLK1,KCNJ2,LGI1,MMP10,NLGN2,PLCB1,RIMS1,ROBO2,SOX21
mut vs wt d702factor 2x q05		NOX4	-1.194	enzyme		-1		-0.069	-0.862	0.0267	ACTA2,CDKN1A,POU5F1,SLC2A1,VEGFA
mut vs wt d702factor 2x q05		EXOSC3	-0.01	enzyme		-1		0.196	-1.392	0.0298	CDKN1A,CER1,LEFTY1,NHLH2
mut vs wt d702factor 2x q05		mir-96		microrna		-1		-0.047	-0.897	0.0322	FOXF2,IFITM1,NMI,SAMD9,VIM
mut vs wt d702factor 2x q05		ASXL2	-0.048	other		-1		-0.196	-0.608	0.0334	ENO2,HYAL1,SCD,VEGFA
mut vs wt d702factor 2x q05		HOXB13	0.737	transcription regulator		-1		-0.101	-0.797	0.0334	AR,CDKN1A,SEMA3A,SLC30A10
mut vs wt d702factor 2x q05		LTB4R	0.553	g-protein coupled receptor		-1		-0.131	-0.739	0.0373	ALOX5,CXCL2,CXCL3,VEGFA
mut vs wt d702factor 2x q05		mir-23		microrna		-1		0.154	-1.308	0.0373	FBXO32,MYCN,PDE8B,SPP1
mut vs wt d702factor 2x q05		GLI1	0.603	transcription regulator		-0.997		-0.162	-0.239	4e-06	ABCG2,CCND2,CD24,CDKN1A,COL2A1,DIO2,GREM2,IGFBP6,IGFBP7,IL6,MAPK11,MEF2C,MNX1,MYCN,NES,PCDH18,POU5F1,PTH1R,S100A9,SCD5,SOX5,SPP1,TNC,VEGFA,VIM	BCL2,CTNNB1,Creb,EGR1,FOXM1,GLI1,HDAC1,Histone h3,JUN,KMT2A,MED1,MYC,NFKB1,NFKBIA,NFkB (complex),RELA,RNA polymerase II,SMAD4,SP1,STAT3,TCF,TP53,VEGFA
mut vs wt d702factor 2x q05		F7	0.077	peptidase		-0.983		-0.119	-0.673	0.00158	AR,CXCL2,IL1B,IL6,PLAUR,SERPINB2,VEGFA	CEBPB,ERK,F2R,F2RL1,F7,FOS,JUN,JUND,MYC,NFKB1,NFkB (complex),P38 MAPK,PPARG,RELA,SMAD3,SP1,STAT3,TP53,ZFP36
mut vs wt d702factor 2x q05		MAPK13	0.215	kinase		-0.981		-0.053	-0.856	0.000245	CDKN1A,IL1B,IL6,IVL,VDR,VEGFA	C/EBP,CEBPB,Creb,DDIT3,EGR1,ERK1/2,FOS,Gm21596/Hmgb1,JUN,JUND,MAPK13,MYC,NFATC2,NFE2L2,NFKB1,NFkB (complex),PARP1,RELA,SMAD3,SP1,STAT3,TP53
mut vs wt d702factor 2x q05		TIRAP	0.166	other		-0.98		-0.112	-0.707	0.00174	CXCL10,CXCL2,CXCL3,CXCL6,IL1B,IL6	AHR,CXCL2,CXCL3,Creb,MYD88,NFKB1,NFKBIA,NFkB (complex),RELA,SMAD3,STAT1,STAT3,TIRAP,TP53
mut vs wt d702factor 2x q05		HDAC5	0.234	transcription regulator		-0.973		-0.014	-0.938	0.0192	ACTA2,CDKN1A,KLF2,MEF2C,MMP10,MYCN,SCD,SIX1
mut vs wt d702factor 2x q05		TNFRSF1B	-1.128	transmembrane receptor		-0.973		-0.089	-0.74	0.0336	APCS,CXCL13,CXCL2,IL6,NTN1,SAA1,TNFAIP3,TNFRSF11A,TYMP
mut vs wt d702factor 2x q05		lipopolysaccharide		chemical drug		-0.967		-0.095	0.079	2.31e-12	ABCC2,ACP5,ACTA2,ADRA2A,AGTR1,ALOX5,ANGPTL2,ANGPTL3,ANXA1,APCS,APOB,AR,AVPR1A,BATF,BDNF,BGN,C1R,CASP1,CCN4,CCND2,CCR1,CCR3,CCRL2,CD200,CD274,CD37,CDH2,CDKN1A,CFP,CGAS,CH25H,CLDN5,CLIC3,COL3A1,COL5A1,CP,CRP,CRYAB,CTSV,CXCL10,CXCL13,CXCL2,CXCL3,CXCL6,CYP1A1,CYP1A2,CYP2A6 (includes others),CYP2B6,DCN,DIO2,DMBT1,EGLN3,ERO1A,FBXO32,FES,FLT4,FST,FSTL1,GBP6,GJA1,GJA5,GNA15,GREB1,GRM4,H19,HPGD,IDO2,IFITM…	AHR,CEBPB,IFNG,IL1B,IL4,IL6,JUN,NFKBIA,NFkB (complex),RELA,SP1,STAT1,STAT3,TNF,TP53,lipopolysaccharide
mut vs wt d702factor 2x q05		FOXC2	-1.208	transcription regulator		-0.963		-0.127	-0.656	0.0038	ACTA2,CDH2,KDR,LEF1,PRDM16,TBX1,VIM,WNT5A	Akt,CTNNB1,EGR1,FOXC2,FOXO1,JUN,MET,NFKB1,NFKBIA,NFkB (complex),SMAD3,SP1,STAT3
mut vs wt d702factor 2x q05		CXCR4	0.48	g-protein coupled receptor		-0.963		-0.134	-0.639	0.00422	CDH2,CDKN1A,CXCL10,IGFBP7,IL6,TNFRSF10C,TNFSF10,VEGFA	Akt,CEBPB,CTNNB1,CXCL12,CXCR4,EGR1,FOXO1,FOXO3,JUN,NFKB1,NFKBIA,NFkB (complex),NKX3-1,PI3K (complex),PTEN,RELA,SMAD3,SP1,STAT3,STAT5B,TP53
mut vs wt d702factor 2x q05		forskolin		chemical toxicant		-0.962		-0.089	-0.306	9.17e-12	ACP5,ACTA2,ADAMTS1,ADAMTS16,AGTR1,AKR1B10,ALDOC,BDNF,CCND2,CD200,CDH2,CDKN1A,CDKN1C,CGREF1,CRYAB,CTSV,CXCL10,CXCL13,CXCL2,CXCL3,CYP1B1,DIO2,DUOX2,EGLN3,FAH,FLNC,FOXE1,FRRS1,FST,GJA1,GPRC5B,H19,HAPLN1,HPGD,HTR2C,IGFBP3,IGFBP6,IL1B,IL6,INHA,INHBB,LARGE1,MMP23B,MYCN,NNAT,NPPB,NR5A1,NT5E,OCA2,PCSK1,PDE4B,PDK4,PTH1R,RGS4,RGS5,RORB,SEMA6D,SERPINB2,SLC15A1,SLC2A1,SNAP25,SPP1,SPRED3,SRXN1,SSTR2,STC1,SYT4…	AGT,CEBPB,CG,CREB1,CTNNB1,Creb,EGR1,EP300,ESR2,FOS,FSH,HDAC1,JUN,NFKB1,NFKBIA,NFkB (complex),SMAD3,SP1,STAT3,TNF,TP53,forskolin
mut vs wt d702factor 2x q05		BMP7	-0.289	growth factor		-0.958		-0.103	-0.61	0.00018	ACTA2,CDH2,CDKN1A,DSC2,DSP,GJA1,IGFBP3,IGFBP6,IL1B,IL6,ITGA5,NDRG1,PRDM16,SOSTDC1,SPP1,VEGFA,VIM,WNT11,WNT5A	AHR,BMP7,CEBPB,Creb,EGR1,ERK1/2,FOS,FOSL1,IL6,JUN,Mapk,NFE2L2,NFKB1,NFKBIA,NFkB (complex),P38 MAPK,RELA,SMAD3,SMAD4,SMAD7,SP1,STAT3,ZFP36
mut vs wt d702factor 2x q05		LAMC1	-0.24	other		-0.958		0.112	-1.18	0.00233	ACTA2,SNAI2,VIM,WNT5A
mut vs wt d702factor 2x q05		CXCL3	-1.498	cytokine		-0.958		-0.196	-0.571	0.00623	CXCL10,CXCL3,IL1B,IL6	CEBPB,CREB1,CXCL3,Creb,EGR1,ERK1/2,FOS,ICAM1,JAK2,JUN,NFKB1,NFKBIA,NFkB (complex),NOTCH1,P38 MAPK,PPARG,RELA,SP1,STAT1,STAT3,ZFP36
mut vs wt d702factor 2x q05		CYP1B1	1.132	enzyme		-0.956		-0.014	-0.919	0.00942	CACHD1,CYP1B1,CYP2B6,NQO1,SLC46A3,SOCS2,TNFSF10	9,10-dimethyl-1,2-benzanthracene,AHR,ARNT,CEBPB,CYP1B1,EGR1,EP300,HDAC1,HIF1A,JUN,NFKB1,RELA,SMAD3,SP1,STAT1,STAT3,TP53
mut vs wt d702factor 2x q05		reactive oxygen species		chemical toxicant		-0.956		-0.162	-0.531	0.0432	ACTA2,CASP1,CD200,CD24,CDKN1A,GLRX,IL1B,IL6,TNFAIP3,VEGFA
mut vs wt d702factor 2x q05		stallimycin		biologic drug		-0.946		-0.187	-0.496	0.0129	CD70,CXCL10,IFITM1,IL1B,IL6,TNFSF10
mut vs wt d702factor 2x q05		vitamin E		chemical drug		-0.946		0.127	-1.251	0.0237	ACTA2,CDKN1A,COL2A1,CYP2A6 (includes others),IL1B,SPP1,VEGFA
mut vs wt d702factor 2x q05		IL18	-0.017	cytokine		-0.945		-0.14	-0.438	0.00233	ADAMTS5,CXCL10,CXCL3,GJA1,GNA15,HLX,IL1B,IL6,INPP5D,SLC2A3,SOCS2,SPP1,TACR1,TF,ULBP2,VEGFA,XCL1	BCL3,CEBPB,CSF2,Creb,EGR1,ERK1/2,FOS,FOXO3,IL18,IL2,IL4,JUN,NFKB1,NFkB (complex),P38 MAPK,SP1,STAT1,STAT3,TP53,ZFP36
mut vs wt d702factor 2x q05		KDM6B	-0.226	enzyme		-0.944		-0.145	-0.66	0.0373	CDH2,IL6,SNAI2,VIM
mut vs wt d702factor 2x q05		STUB1	0.409	enzyme		-0.933		0.088	-1.145	0.0451	ACTA2,AR,CDKN1A,IL6,TFEB,VEGFA
mut vs wt d702factor 2x q05		Lh		complex		-0.929		-0.054	-0.724	0.0002	ACP5,ACTA2,ADAMTS1,AR,BDNF,CCND2,CDKN1C,FLNC,FST,GJA1,GPRC5B,IL6,INHA,INHBB,NR5A1,PPFIA4,PTX3,RGS4,RGS5,SFRP4,SLIT2,SNAP25,TNFAIP3,VEGFA	AR,CEBPB,CG,CTNNB1,Creb,EGR1,ESR1,ESR2,FOS,INHBA,JUN,Lh,NFKB1,NFkB (complex),NR1I2,PGR,SMAD2,SMAD3,SMAD7,SP1,STAT3,beta-estradiol,cyclic AMP,progesterone
mut vs wt d702factor 2x q05		KDM4B	-0.091	enzyme		-0.927		-0.152	-0.625	0.000349	LCN2,LOX,LOXL2,VIM
mut vs wt d702factor 2x q05		KDM1A	-0.119	enzyme		-0.925		0.04	-1.08	0.000613	ARHGDIB,BARX2,CCND2,CDA,CDKN1A,CENPF,CHN1,CXCL10,GREB1,KLF2,LEFTY1,NES,POU5F1,PTPRB,SCD,SFRP4,SNAP25,SOCS2,TM4SF1,TMCC3	Histone h3,KDM1A,KMT2A,MED1,RELA,RNA polymerase II,SP1
mut vs wt d702factor 2x q05		BTRC	-0.116	enzyme		-0.924		0.053	-1.028	0.0177	CDKN1A,DEPTOR,IL1B,IL6
mut vs wt d702factor 2x q05		PML	0.09	transcription regulator		-0.919		-0.005	-0.903	0.0246	CDH2,CDKN1A,IFITM1,IL1B,MAPK11,MMP10,NDRG1,NQO1,PDK4,SCD,SNAI2,TNFAIP3,VIM
mut vs wt d702factor 2x q05		IL36A		cytokine		-0.918		-0.196	-0.372	8.94e-05	CXCL10,CXCL2,CXCL3,CXCL6,IL1B,IL6,LCN2,S100A9	CEBPB,Creb,EGR1,ERK1/2,FOS,HSPB1,IL36A,IL6,JUN,NFKB1,NFKBIA,NFkB (complex),P38 MAPK,PPARG,RELA,SP1,STAT3,ZFP36
mut vs wt d702factor 2x q05		resiquimod		chemical drug		-0.917		-0.13	-0.516	0.00599	BATF,CCR1,CCRL2,CD70,CHST2,CXCL10,CXCL13,CXCL2,CXCL3,GNG2,IFITM1,IL1B,IL6,KCNMA1,MX2,PRDM1,PTX3,SPP1,TNFAIP3,TNFRSF11A,TNFSF10,VEGFA	CEBPB,CHUK,CTNNB1,IFNG,IL10,JUN,MYC,NFKB1,NFKBIA,NFkB (complex),RELA,SMAD3,STAT1,STAT3,TLR7,resiquimod
mut vs wt d702factor 2x q05		8-bromo-cAMP		chemical reagent		-0.913		-0.111	-0.405	1.67e-05	CYP1B1,CYP2B6,DCN,DIO2,GJA1,HPGD,IL1B,IL6,INHA,INHBB,KDR,LOX,MMP23B,NQO1,NR5A1,PDE3B,PDE4B,SERPINB2,SLC2A1,SPP1,UGT1A1,VEGFA	8-bromo-cAMP,AHR,ARNT,CEBPB,CREBBP,CTNNB1,Creb,ESR1,ESR2,FOS,FOSL1,HIF1A,JUN,JUND,MYC,Mapk,NCOA2,NFE2L2,NFKB1,RELA,SP1,STAT3,TP53,beta-estradiol
mut vs wt d702factor 2x q05		Brd4		kinase		-0.905		-0.171	-0.336	0.000286	ACTA2,APCS,C1R,COL3A1,COL8A1,IL6,KDR,LEFTY1,LOX,LOXL2,TNFSF10	Brd4,CTNNB1,EP300,Histone h3,JUN,KLF4,KMT2A,MED1,MYC,NFkB (complex),RELA,RNA polymerase II,SMAD3,SP1,STAT3,TP53
mut vs wt d702factor 2x q05		LTB	-0.602	cytokine		-0.9		-0.177	-0.553	0.00247	CHST4,CRP,CXCL13,IL1B,IL6	CCL5,CEBPB,CHUK,CREB1,IL1,LTB,NFKB1,NFKBIA,NFkB (complex),PPARG,RELA,SMAD3,STAT1,STAT3
mut vs wt d702factor 2x q05		TGFA	0.966	growth factor		-0.9		-0.14	-0.492	0.00251	CASP1,CDKN1A,CXCL10,CXCL2,IL6,LCN2,NES,VEGFA,VIM,WNT5A	CEBPB,CTNNB1,Creb,IL6,JUN,MMP9,MYC,NFKB1,NFKBIA,NFkB (complex),RELA,SMAD3,STAT1,STAT3,TGFA,prostaglandin E2
mut vs wt d702factor 2x q05		IFNA1/IFNA13		cytokine		-0.899		-0.127	-0.576	0.0114	AR,CD274,CXCL10,CYP1A1,CYP1A2,IFITM1,IL1B
mut vs wt d702factor 2x q05		A2M	-0.223	transporter		-0.896		-0.083	-0.695	0.0117	CDH2,IL1B,IL6,SLC2A1,WNT1,WNT5A
mut vs wt d702factor 2x q05		azoxymethane		chemical toxicant		-0.888		-0.136	-0.561	0.00187	AGTR1,CDKN1A,CXCL10,CXCL2,CXCL3,CXCL6,IGFBP3,IL1B,IL6	CEBPB,CTNNB1,HDAC1,JUN,MYC,NFKB1,NFKBIA,NFkB (complex),P38 MAPK,RELA,SMAD3,SP1,STAT1,STAT3,TP53,ZFP36,azoxymethane
mut vs wt d702factor 2x q05		poly dA-dT		chemical reagent		-0.881		-0.196	-0.491	0.0177	CGAS,CXCL10,IL1B,IL6
mut vs wt d702factor 2x q05		PRL	2.202	cytokine		-0.877		-0.131	-0.234	0.000211	ABCG2,AKR1C3,CDKN1A,CLDN5,CNN3,COL3A1,COL5A1,CTSV,CXCL10,DCN,FLT4,GMPR,GPNMB,IFITM1,IGFBP3,IL6,MX2,PDK4,PDLIM4,PDPN,SAMD9,SOCS2,SPP1,TPH1,VDR,VIM	AR,Creb,EGR1,ERBB2,ERK1/2,ESR1,FOS,HIF1A,JUN,MAPK1,MYC,NFKB1,NFkB (complex),NR1I2,PGR,POU5F1,PPARG,PRL,RARA,SP1,SRC,STAT3,TP53,progesterone
mut vs wt d702factor 2x q05		cis-urocanic acid		chemical drug		-0.87		-0.196	-0.321	1.99e-06	ADAMTS1,AKR1C1/AKR1C2,CRYAB,GLRX,IGFBP3,IL6,SERPINB2,TNFAIP3
mut vs wt d702factor 2x q05		acetaminophen		chemical drug		-0.868		-0.062	-0.591	1.18e-05	ABCC2,ABCG2,APOA2,CCR1,CDKN1A,CPS1,CRP,CTSV,CXCL10,CXCL2,CXCL3,CYP1A2,DMBT1,FLT4,IGFBP3,IL1B,IL6,KDR,NQO1,PLAUR,TF,VEGFA	AHR,CEBPB,Creb,IL1B,JUN,NFE2L2,NFKB1,NFKBIA,NFkB (complex),PPARG,PTGS2,RAF1,RELA,SMAD3,STAT3,TNF,TP53,acetaminophen
mut vs wt d702factor 2x q05		gemcitabine		chemical drug		-0.865		-0.107	-0.611	0.00817	CD24,CD274,CDKN1A,IL1B,NT5E,SLC28A3,VEGFA,WT1	AHR,AR,Akt,EGFR,EGR1,FOXO1,Gm21596/Hmgb1,HIF1A,Hif1,JUN,NFATC2,NFE2L2,NFKB1,NFKBIA,NFkB (complex),PARP1,PPARG,RELA,SMAD3,SP1,STAT3,TP53,VHL,gemcitabine
mut vs wt d702factor 2x q05		isobutylmethylxanthine		chemical toxicant		-0.865		-0.099	-0.579	0.0119	APLN,BDNF,CDKN1A,CHGA,COL3A1,COL5A1,CRABP2,IL13RA2,IL1B,ITGB2,LDHA,PDE3B,PDK1,PDK4,SCD,SYK,TNC
mut vs wt d702factor 2x q05		NKX2-5	-0.919	transcription regulator		-0.858		-0.147	-0.508	5.62e-05	ACTA2,DIO2,GJA1,GJA5,HOPX,MEF2C,MYCN,PITX2,SCGB1A1	GATA4,MEF2C,NFKBIA,NFkB (complex),NKX2-5,TBX5
mut vs wt d702factor 2x q05		Interferon alpha		group		-0.852		-0.122	-0.213	0.00121	A4GALT,CASP1,CCND2,CCR1,CCR3,CD274,CD70,CDKN1A,CGAS,CH25H,CXCL10,CXCL2,CXCL3,CYP1A2,GBP6,GNA15,IFITM1,IFITM2,IL1B,IL6,ITGA4,LARGE1,MX2,NMI,NT5E,S100A9,SAMD9,SLAMF7,SLC2A3,SOCS2,TNFSF10,TTC28,TYMP,ULBP2	CEBPB,CTNNB1,HDAC3,IFNAR1,IFNB1,IFNG,Interferon alpha,JUN,MYC,NFKBIA,NFkB (complex),RELA,SMAD3,STAT1,STAT3,STAT4
mut vs wt d702factor 2x q05		CH-223191		chemical reagent		-0.849		0	-0.849	0.00396	ACTA2,COL3A1,CYP1A1,NT5E
mut vs wt d702factor 2x q05		POU5F1	-1.353	transcription regulator		-0.842		-0.068	-0.51	3.98e-06	APCDD1,CASP1,CD70,CDH2,CDKN1A,CRABP2,CXCL10,DSP,EVPL,FOXE1,FRZB,GREB1,H19,HOPX,IL6,KLF2,LEFTY1,LOXL1,MEF2C,MIAT,MYCN,ONECUT1,PCDH18,PITX2,POU5F1,SNAI2,SPP1,TET1,TF,TNFSF10,VEGFA,VIM,WNT5A,ZFP42	AKT1,CEBPB,FOXO3,GATA6,Histone h3,KMT2A,MED1,NFkB (complex),POU5F1,RELA,RNA polymerase II,RUNX2,SMAD2,SNAI2,SOX2,SP1,TP53
mut vs wt d702factor 2x q05		NR5A1	-3.792	ligand-dependent nuclear receptor		-0.832		-0.16	-0.455	0.00748	ADCY4,GSTA2,INHA,MAMLD1,NR5A1,PNMT,POU5F1,VIM
mut vs wt d702factor 2x q05		zymosan A		chemical - endogenous non-mammalian		-0.83		-0.175	-0.485	0.00922	ANXA1,IL1B,IL6,SAA1	AHR,CXCL2,Ccl2,Gm21596/Hmgb1,IL1B,NFKB1,NFKBIA,NFkB (complex),RELA,STAT3,TNFRSF1A,TP53,zymosan A
mut vs wt d702factor 2x q05		APP	-0.1	other		-0.829		-0.073	-0.411	0.0151	ABCG2,ACTA2,AK1,ALDOC,ATP12A,BDNF,C1R,CCND2,CDH2,CDKN1A,CH25H,CKB,CLDN5,CP,CPLX2,CRABP2,CTSV,CXCL10,CXCL2,CXCL3,CXCL6,CYRIA,DCN,ENO2,GBP6,GNG2,H19,IL13RA2,IL1B,IL6,ITGA4,KCND2,KCND3,KYNU,LDHA,LEF1,MEF2C,MMP10,NEFL,NES,NNAT,PCP4,PDE4B,PDK1,SLC13A3,SLIT2,SNAP25,SYT4,TBX1,THSD4,TNFSF10,TUBA3E,TUBB2B,VEGFA,WNT1
mut vs wt d702factor 2x q05		FOS	0.007	transcription regulator		-0.824		-0.062	-0.511	1.05e-08	AGTR1,AKR1C3,ALDH1A3,APLN,BDNF,CADM1,CFP,CHGA,COL16A1,CRABP2,CSTA,CTSV,CXCL10,CXCL3,DIO2,FMN1,FOXC1,FRZB,FSTL1,GJA1,GREB1,HPGD,IGDCC3,IGFBP6,IL1B,IL6,IVL,KLK12,LARGE1,LOX,MMP10,NPPB,NQO1,PCDH19,PDPN,PLAUR,PRDM1,PTH1R,PTPRZ1,RGS4,S100A9,SCD,SEMA3A,SEMA6D,SERPINB2,SFRP4,SNAI2,SPP1,SULF2,TACR1,TNFRSF11A,VEGFA,VIM,WNT1,WNT11,WNT5A	CEBPA,CEBPB,ESR1,ESR2,FOS,JUN,JUNB,JUND,MYC,NFKB1,NFKBIA,NFkB (complex),PPARG,RELA,SMAD3,SP1,STAT3,TP53
mut vs wt d702factor 2x q05		kainic acid		chemical toxicant		-0.823		-0.135	-0.337	0.00357	BDNF,CD200,CNR1,FGF9,GABRB2,GRM4,IL1B,KCNQ2,KDR,LCN2,PNMT,RGS4,SLC39A4,SPP1,VEGFA	BDNF,CEBPB,CREB1,CTSB,EGR1,FOS,JUN,MEF2C,NFKB1,NFKBIA,NFkB (complex),NGF,P38 MAPK,PPARG,RELA,SMAD3,SP1,STAT3,TP53,ZFP36,kainic acid
mut vs wt d702factor 2x q05		leukotriene D4		chemical - endogenous mammalian		-0.822		-0.189	-0.295	0.00218	ADAMTS1,CXCL2,HLX,IL6,KCNJ2,KLF2,NDRG1,PDK4	Alpha catenin,CTNNB1,ERK,IL4,JUN,NFkB (complex),PPARG,RELA,SMAD3,SP1,STAT3,TP53,leukotriene D4
mut vs wt d702factor 2x q05		TBX5	-0.893	transcription regulator		-0.816		-0.125	-0.412	5.6e-06	COL3A1,CXCL2,CXCL6,CXCR6,GJA1,GJA5,IL6,ITGB1BP2,KCNJ2,MEF2C,NPPB,PTPRB,TNNT2,VIM	EP300,GATA2,GATA3,GATA4,MEF2C,NFKB1,NFKBIA,NFkB (complex),NKX2-5,PPARG,RELA,SIRT1,STAT3,TBX5,TP53
mut vs wt d702factor 2x q05		DUSP5	0.224	phosphatase		-0.816		0.176	-1.248	0.000137	ALDH1A3,CH25H,PRDM1,SERPINB2,SRXN1,SSTR2
mut vs wt d702factor 2x q05		NSUN6	-0.271	enzyme		-0.816		-0.196	-0.337	0.00579	FSTL1,GAS6,ITGB2,NDRG1,TNNT2,TNS1
mut vs wt d702factor 2x q05		pimagedine		chemical drug		-0.816		0.065	-0.976	0.00657	ACTA2,CASP1,CRP,IL6,TNFSF10,VEGFA	CASP1,JUNB,NFKB1,NFKBIA,NFkB (complex),PPARG,PYCARD,RELA,STAT3,TP53,pimagedine
mut vs wt d702factor 2x q05		KMT2A	-0.359	transcription regulator		-0.816		-0.191	-0.349	0.00674	ADRA1B,CDKN1A,DEPTOR,FOXC1,MEIS2,PIGZ,PITX2,PRDM16,RGS4,TET1	ESR1,Histone h3,KMT2A,MED1,RELA,RNA polymerase II,SP1
mut vs wt d702factor 2x q05		SELPLG	0.801	other		-0.816		-0.159	-0.426	0.00937	BST1,CDKN1A,CXCL2,CYP1B1,IL1B,PLAUR	CEBPB,IFNG,IL4,JUN,NFkB (complex),SELPLG,SP1,STAT1,STAT3,TP53
mut vs wt d702factor 2x q05		RHO	0.21	g-protein coupled receptor		-0.816		-0.031	-0.741	0.0482	DPYSL3,FBLN1,MEF2C,NT5E,PRPH2,TNFAIP3
mut vs wt d702factor 2x q05		LUM	0.522	other		-0.811		-0.147	-0.521	0.000561	CDKN1A,CXCL2,IL1B,IL6
mut vs wt d702factor 2x q05		mifepristone		chemical drug		-0.805		0.041	-1.031	4.24e-06	ABCC2,ANXA1,AR,CASP1,CDH2,CDKN1A,COL2A1,CTSF,DIO2,FST,GAS6,GJA1,HPGD,IGFBP3,IL13RA2,IL1B,IL6,INHBB,ITGA4,KLF11,LEFTY1,LOX,NDRG1,NPL,PTN,PTX3,SFRP4,SLC2A1,SNAP25,SPP1,SSTR2,TAT,VDR	AHR,AR,CEBPB,CREB1,CTNNB1,Creb,ESR1,ESR2,FOS,FOXO3,JUN,NFKB1,NFKBIA,NFkB (complex),NR1I2,PGR,SP1,STAT3,TNF,dexamethasone,mifepristone,progesterone,testosterone
mut vs wt d702factor 2x q05		MYD88	-0.173	other		-0.805		-0.178	0.077	0.000118	APCS,BATF,CCN4,CCRL2,CD200,CD274,CH25H,CXCL10,CXCL13,CXCL2,CXCL3,CXCL6,FBXO32,IL1B,IL6,INPP5D,ITGA4,ITGB7,MMP10,PDE4B,SAA1,SH3BP5,SLC16A3,SPP1,TFEC,TNFAIP3	CEBPB,CHUK,Creb,FOS,IL10,JUN,MYD88,NFKB1,NFKBIA,NFkB (complex),PRKD1,RELA,SMAD3,STAT1,STAT3,TIRAP,TNF
mut vs wt d702factor 2x q05		E. coli serotype 0127B8 lipopolysaccharide		chemical - endogenous non-mammalian		-0.803		-0.063	-0.506	1.13e-06	ADGRG2,ADRA2A,ANXA1,BDNF,CCRL2,CHST11,CXCL10,CXCL2,DIO2,GJA1,GJA5,GMPR,GNG2,GPR158,GPRC5B,IL1B,IL6,KLF2,LCN2,LOX,PTX3,SLC6A1,VEGFA,VIPR1	CEBPB,CREBBP,CTNNB1,Creb,E. coli serotype 0127B8 lipopolysaccharide,ESR2,IFNG,JUN,NCOA2,NFKB1,NFKBIA,NFkB (complex),PPARG,RELA,STAT1,STAT3,TNF,TP53
mut vs wt d702factor 2x q05		T3-TR-RXR		complex		-0.8		-0.158	-0.359	0.00029	AKR1C1/AKR1C2,AKR1C3,NRGN,NXPH2,PDE3B,SLC16A3,SLC2A1,SYT2
mut vs wt d702factor 2x q05		tunicamycin		chemical - endogenous non-mammalian		-0.798		-0.106	-0.398	0.0258	ABCA12,ABCG2,CDKN1A,CLDN5,COL2A1,CXCL2,CXCL3,CYP1A2,ERO1A,HAPLN1,IL1B,IL6,NDRG1,SCD,SLC2A1,VEGFA
mut vs wt d702factor 2x q05		SOX2	-0.633	transcription regulator		-0.794		-0.055	-0.454	5.94e-07	ABCG2,ALOX5,APCDD1,CCN4,CDH2,CDKN1A,CER1,CHRD,CRABP2,DSP,EVPL,FOXE1,FRZB,FST,GJA1,GLI3,GREB1,H19,HOPX,KDR,LEF1,LEFTY1,LRP4,MEF2C,MYCN,ONECUT1,PARVB,PCDH18,PDK1,PITX2,POU5F1,PRDM1,SAPCD2,SEMA3D,SMOC1,SOSTDC1,SOX21,TET1,TF,UGT8,VEGFA,VIM,WNT5A,ZFP42,ZFP57	ESR1,GATA4,GATA6,POU5F1,SNAI2,SOX2
mut vs wt d702factor 2x q05		Creb		group		-0.793		-0.101	-0.374	7.72e-05	ACTA2,ALOX5,BDNF,CASP1,CCN4,CDH10,CDKN1A,CHGA,CLMN,COL8A1,CTSV,CXCL10,GJA1,GJA5,HPGD,IL1B,IL6,INHA,IVL,NMNAT2,PDE3B,PDE4B,PFKFB4,SERPINB2,SLIT2,SSTR2,TF,ULBP2,VEGFA,WNT1	CREBBP,CTNNB1,Creb,EP300,FOXM1,HDAC1,Histone h3,JUN,KMT2A,MED1,MEF2C,MMP9,MYC,NFKB1,NFkB (complex),NOTCH1,RELA,RNA polymerase II,SMAD4,SP1,STAT3,TCF,TP53
mut vs wt d702factor 2x q05		GJA1	-1.012	transporter		-0.785		0.032	-0.861	0.00244	CDKN1A,GJA1,IL1B,SPP1,VEGFA,VIM	AGT,FOS,GJA1,HDAC1,HIF1A,JUN,MYC,NFKB1,NFKBIA,NFkB (complex),PPARG,RELA,SMAD3,SP1,SRC,STAT3,TP53,tetradecanoylphorbol acetate
mut vs wt d702factor 2x q05		CXCR2	-0.018	g-protein coupled receptor		-0.784		-0.009	-0.766	0.0152	CXCL10,CXCL2,CXCL3,IL6
mut vs wt d702factor 2x q05		IL6	-2.499	cytokine		-0.779		-0.103	-0.047	5.68e-09	ABCC2,ABCG2,ACTA2,ADAMTS1,ADAMTS5,AKR1B10,ANXA1,APCS,APOB,BATF,BDNF,BGN,CASP1,CCR1,CCR3,CD274,CDKN1A,CFP,COL2A1,COL3A1,CP,CRP,CRYAB,CXCL10,CXCL13,CXCL2,CXCL3,CXCL6,CYP1A1,CYP1A2,CYP1B1,CYP2B6,DCN,EGLN3,ENO2,FAH,FRRS1,GLRX,HPGD,IGFBP3,IGFBP6,IGFN1,IL6,KDR,KIFC1,LARGE1,LCN2,MFAP4,MMP10,MYCN,PCSK1,POU5F1,PRDM1,S100A9,SAA1,SAA2,SAA4,SEMA6D,SERPINA7,SLC2A2,SOCS2,SPP1,SV2B,TF,TNC,TNFRSF11A,TNFSF10,VEGF…	AHR,CEBPB,IL1A,IL1B,IL6,JUN,NFKB1,NFKBIA,NFkB (complex),RELA,SMAD3,STAT3,TNF,TP53
mut vs wt d702factor 2x q05		CARD9	0.339	other		-0.774		-0.142	-0.466	0.00174	CCR1,CXCL10,CXCL2,CXCL3,IL1B,IL6	AHR,CARD9,CTNNB1,ERK,IL10,JUN,MYC,NFKB1,NFKBIA,NFkB (complex),PPARG,RELA,SMAD3,STAT1,STAT3,TP53
mut vs wt d702factor 2x q05		DETA-NONOate		chemical reagent		-0.765		-0.029	-0.69	0.00774	BGN,CA9,CDKN1A,CXCL3,IL6,LOXL2,PDE3B	AR,CEBPB,DETA-NONOate,Gm21596/Hmgb1,HIF1A,Hif1,JUN,NFATC2,NFE2L2,NFkB (complex),P38 MAPK,PARP1,PPARG,RELA,RXRA,SMAD2,SMAD3,SMAD4,SP1,STAT3,TP53,VHL,ZFP36
mut vs wt d702factor 2x q05		BAK1	0.351	other		-0.762		-0.17	-0.426	0.0373	CXCL10,ERO1A,IFITM2,IL6
mut vs wt d702factor 2x q05		STK11	0.17	kinase		-0.76		-0.053	-0.512	0.00649	BMP5,CD274,CDKN1A,COL3A1,CPS1,CXCL6,CYP2B6,IL1RAP,IL6,IYD,KCNQ2,KLHL29,LDHA,NT5E,PTPRZ1,SNAI2,SPP1,SYT4,TNFAIP3,TNFSF10,VEGFA,WNT5A	Akt,CEBPB,CTNNB1,EGR1,FOXO1,FOXO3,HIF1A,IGF1,IL1A,JUN,NFKB1,NFKBIA,NFkB (complex),PRKAA1,PRKAA2,RELA,SIRT1,SMAD3,SP1,SQSTM1,STAT3,STK11
mut vs wt d702factor 2x q05		P38 MAPK		group		-0.755		-0.157	0.09	3.13e-07	BDNF,BGN,CCND2,CD70,CDKN1A,CLDN5,COL3A1,CXCL10,CXCL2,CXCL3,CXCL6,CYP1A1,DIO2,DUOX2,FBXO32,FST,GJA1,IL1B,IL6,ITGA4,ITGB2,IVL,LDB3,MEF2C,NPPB,NPR1,PLAUR,POU5F1,PRDM1,RGS4,SERPINB2,SPP1,TNFSF10,TNNT3,ULBP2,VDR,VEGFA,WNT5A,ZMAT3	CEBPA,CEBPB,CTNNB1,ERK,FGF2,FOS,JUN,MYC,NFKBIA,NFkB (complex),P38 MAPK,PPARG,RELA,SMAD3,SP1,STAT1,STAT3,TNF
mut vs wt d702factor 2x q05		CCN2	-0.015	growth factor		-0.754		-0.102	-0.367	1.06e-05	ADAMTS1,ADAMTS5,COL2A1,COL8A1,DCN,EGLN3,HAPLN1,IL6,LEF1,LOX,P4HA1,POU5F1,PTH1R,RAMP2,SFRP4,VEGFA	Akt,CCN2,CEBPB,EGFR,EGR1,FOS,FOXO1,HIF1A,IL6,JUN,MYC,NFKB1,NFKBIA,RELA,SMAD3,SMAD4,SP1,SRC,STAT3,TGFB1,TP53
mut vs wt d702factor 2x q05		CCN1	0.148	other		-0.751		-0.131	-0.308	6.89e-05	CCND2,CDKN1A,CXCL10,CXCL2,CXCL3,IL1B,IL6,ITGA5,KDR,TNFSF10,VEGFA,WNT1,WNT5A	CCN1,CEBPB,CTNNB1,FGF2,FOXO1,FOXO3,JUN,MYC,NFKB1,NFKBIA,NFkB (complex),P38 MAPK,PI3K (complex),PPARG,RELA,SP1,STAT3,ZFP36
mut vs wt d702factor 2x q05		MYOCD	-0.734	transcription regulator		-0.749		-0.096	-0.401	2.64e-05	ACTA2,CDKN1A,COL2A1,COL3A1,FBXO32,GJA1,GJA5,GJC1,ITGB1BP2,MEF2C,NPPB,PTPRB,TNNT2,VEGFA
mut vs wt d702factor 2x q05		AZGP1	0.792	transporter		-0.747		0	-0.747	0.0232	DSP,FBXO32,ITGA5,VIM
mut vs wt d702factor 2x q05		FUS-DDIT3		fusion gene/product		-0.745		0.069	-0.962	1.32e-06	IGFBP6,IL1B,IL6,KLF2,LCN2,LOX,PTX3,RGS4,SERPINB2,VIM	CEBPB,FUS-DDIT3,IL6,JUN,NFKBIA,RELA,STAT3
mut vs wt d702factor 2x q05		IL23A	-0.43	cytokine		-0.739		-0.172	-0.357	0.0123	CXCL10,CXCL13,IL1B,IL6,S100A9
mut vs wt d702factor 2x q05		IL22	0.014	cytokine		-0.738		-0.11	-0.303	2.17e-05	ACTA2,CD274,CXCL10,CXCL13,CXCL2,CXCL3,CXCL6,CYP1A2,DMBT1,FLG,GRP,IL1B,IL6,IVL,LCN2,S100A9,SAA1,WFDC12	AHR,C3,CEBPB,CTNNB1,FOS,IL13,IL17A,IL22,JUN,MYC,NFKB1,NFKBIA,NFkB (complex),RELA,SMAD3,STAT1,STAT3
mut vs wt d702factor 2x q05		levodopa		chemical - endogenous mammalian		-0.738		-0.022	-0.586	0.000214	ACTA2,APLP1,C2CD4C,CD200,CHRM2,CHST11,CLDN5,CNR1,COCH,CSRNP3,CYP2A6 (includes others),DAB1,DDIT4L,DMTN,FAH,FBLN1,FES,GAS7,GPR158,GRID2,INPP5F,ITPKA,KCND2,LAPTM5,MAPK11,MDGA2,MEF2C,MEIS2,MOB3A,MUSK,NT5E,PIEZO2,PITPNM3,PPP4R4,PTPRZ1,RIMS1,ROBO2,SCN4B,SCUBE3,SHANK3,SLC2A1,SORCS2,SOX5,SPOCK3,SYT4,TAF9B,TIAM1,UNC13C,ZNF385B
mut vs wt d702factor 2x q05		hydrochloric acid		chemical - endogenous mammalian		-0.736		-0.144	-0.472	0.0298	CXCL2,CXCL3,IL1B,IL6
mut vs wt d702factor 2x q05		2'3'-cyclic guanosine monophosphate-adenosine monophosphate		chemical - endogenous mammalian		-0.728		-0.196	-0.345	0.00233	CASP1,CGAS,CXCL10,IL1B	2'3'-cyclic guanosine monophosphate-adenosine monophosphate,JUN,NFKB1,NFKBIA,NFkB (complex),SMAD3,STAT1,STAT3,STING1
mut vs wt d702factor 2x q05		TWIST1	-0.223	transcription regulator		-0.727		-0.07	-0.372	5.2e-10	ACTA2,ADAMTS1,APOD,AR,CCN4,CDH2,CDKN1A,COL2A1,DCN,DPYSL3,EMP3,FBN2,FMOD,FREM2,IL1B,IL6,ITGA8,NT5E,OLFML3,PCDH18,PTPRZ1,SLC28A3,SNAI2,SPP1,TF,UNC5B,VEGFA,VIM	BCL2,CEBPB,Creb,EGR1,FOXO1,GLI1,JUN,LEF1,NFKB1,NFKBIA,NOTCH1,PPARD,PPARG,PPARGC1A,RBPJ,RELA,RUNX2,RXRA,SIRT1,SP1,SPZ1,STAT3,TP53,TWIST1,cyclic AMP
mut vs wt d702factor 2x q05		SNCA	-0.234	enzyme		-0.726		-0.032	-0.608	0.000163	ABLIM3,BDNF,CDHR1,CHRM2,CHRNA2,CTHRC1,DPP10,GLDC,GOLGA8K (includes others),IL1B,IL6,ITPKA,KCNIP4,KIFC1,KLHL1,LRRC7,NQO1,NTN1,OPRK1,PTPRB,RCN3,RSPO2,SLC2A3,SMOC1,SV2B,SYN3,TACR1,TMEM255A,UGT1A1	AHR,Creb,ESR1,FOS,JUN,JUND,MAPK7,MEF2C,NFE2L2,NFkB (complex),NOS1,Pkc(s),SNCA
mut vs wt d702factor 2x q05		IL7	-0.563	cytokine		-0.722		-0.129	-0.32	0.0236	CCND2,CD274,CDKN1A,CXCL2,CXCL3,IL6,ITGB7,KLF2,LEF1,NTN1,SLC2A1,TNFSF10
mut vs wt d702factor 2x q05		miR-92a-3p (and other miRNAs w/seed AUUGCAC)		mature microrna		-0.721		0.196	-1.194	0.00207	CCND2,CDKN1A,CDKN1C,ENPP6,IL6,ITGA5	FOS,JUN,JUND,MYC,SP1,TP53,miR-92a-3p (and other miRNAs w/seed AUUGCAC)
mut vs wt d702factor 2x q05		ERG	-1.893	transcription regulator		-0.72		-0.155	-0.13	0.00161	AR,CDH2,CNR1,ELMO1,FLNC,FMNL3,HPGD,LEF1,MYCN,NDRG1,NLGN1,PLA1A,PLAUR,PREX2,SLIT2,SPP1,VIM,WNT1,WNT11	Akt,CEBPB,CTNNB1,EGR1,ERG,ESR2,FOS,FOXO1,HIF1A,JUN,JUND,MYC,NFKB1,NFkB (complex),SMAD3,SP1,SRC,STAT3,TP53
mut vs wt d702factor 2x q05		triamterene		chemical drug		-0.718		-0.178	-0.079	3.56e-06	ADAMTS1,ANXA1,CP,EFEMP2,EMP3,GPNMB,GPX2,LCN2,PLA1A,PRTFDC1,SLC34A2,SPP1,VIM
mut vs wt d702factor 2x q05		GNRH		group		-0.714		-0.101	-0.493	0.0196	CHGA,IGFBP3,INHA,SEMA3A,STC1
mut vs wt d702factor 2x q05		hexachlorobenzene		chemical toxicant		-0.711		-0.168	-0.181	0.000132	ANXA1,CP,EFEMP2,EMP3,GPNMB,GPX2,LCN2,SLC34A2,SPP1,VIM
mut vs wt d702factor 2x q05		KRT17	-0.335	other		-0.707		-0.082	-0.475	3.49e-05	CCR1,CXCL10,CXCL2,CXCL3,CXCL6,IL1B,IL6,SPP1
mut vs wt d702factor 2x q05		clopidogrel		chemical drug		-0.707		-0.034	-0.612	0.00968	ATOH8,COL5A1,CRP,HOXA3,PTX3,RASL11A,STC2,VEGFA
mut vs wt d702factor 2x q05		colistin		biologic drug		-0.707		-0.01	-0.68	0.0434	AK1,APOD,CFP,GAS6,PTPRZ1,RTN4RL1,SOCS2,SPP1,TNFRSF11A
mut vs wt d702factor 2x q05		kanamycin A		chemical drug		-0.707		-0.006	-0.691	0.0477	AK1,APOD,CFP,GAS6,PTPRZ1,RTN4RL1,SOCS2,SPP1,TNFRSF11A
mut vs wt d702factor 2x q05		Salmonella enterica serotype abortus equi lipopolysaccharide		chemical toxicant		-0.705		-0.196	0.016	0.0136	ADAMDEC1,CCRL2,CD274,CXCL2,CXCL3,IL1B,IL6,KCNJ2,MMP10,PLA1A,PTX3,SERPINB2,SLAMF7,WNT5A
mut vs wt d702factor 2x q05		SNAI1	-0.855	transcription regulator		-0.704		0.013	-0.757	4.36e-08	BMP5,CCND2,CDH2,CDKN1A,CLCA2,COL2A1,DPYSL3,ESPN,FLNC,FST,HPGD,INHA,LEF1,MSI1,NES,PARVB,POU5F1,PTX3,SLC28A3,SNAI2,TF,TMOD1,VDR,VIM	AHR,AR,Akt,CTNNB1,EGR1,FOXO1,HDAC1,HIF1A,MYOCD,NFKB1,NFkB (complex),NOTCH1,RUNX2,SMAD3,SMAD4,SMAD7,SNAI1,SP1,STAT3,TGFB1,TP53
mut vs wt d702factor 2x q05		INS		other		-0.702		-0.02	-0.637	0.0467	ACTA2,CDKN1A,CRABP2,CRP,DEPTOR,IGFBP3,IL6,PRDM16,SCD,SLC2A1,SLC2A2,VEGFA
mut vs wt d702factor 2x q05		IKZF1	-0.426	transcription regulator		-0.698		0.111	-1.147	0.0425	CCND2,CCR1,CDKN1A,CXCL2,GAS6,GAS6-DT,IL6,NFIX,OPRK1,PTH1R,SH3BP5,SLC2A1,SLC2A3,SULF2,TNNT2,TSHZ1,VIPR1
mut vs wt d702factor 2x q05		Hmgb1		transcription regulator		-0.678		-0.157	-0.342	0.0016	CDKN1A,CHGA,IL1B,IL6,NEFL	CEBPB,CREBBP,CTNNB1,Creb,ESR2,Hmgb1,IL1A,IL1RN,JUN,MMP9,NCOA2,NFKB1,NFKBIA,NFkB (complex),PPARG,RELA,STAT3,TP53
mut vs wt d702factor 2x q05		imiquimod		chemical drug		-0.672		-0.161	-0.204	0.00961	CD274,CSTA,CXCL2,IFITM1,IL1B,IL6,ITGB2,LCN2,S100A9,TNFSF10	IL17A,Interferon alpha,JUN,NFKB1,NFKBIA,NFkB (complex),RELA,SMAD3,STAT1,STAT3,TLR7,TP53,imiquimod
mut vs wt d702factor 2x q05		JAK2	0.401	kinase		-0.67		-0.166	-0.242	0.00264	AKR1C3,ALOX5,CASP1,CCND2,CDKN1A,CPLX2,CXCL10,F5,IL1B,IL6,ITGA5,LCN2,RIPPLY3,TF,XIST	CREBBP,CTNNB1,Creb,EGR1,ERK1/2,ESR2,FOS,FOXO1,FOXO3,JAK2,JUN,NCOA2,NFE2L2,NFKB1,NFKBIA,NFkB (complex),PI3K (complex),RELA,SMAD3,SP1,STAT1,STAT3,TP53,heme
mut vs wt d702factor 2x q05		ochratoxin A		chemical toxicant		-0.665		0	-0.665	0.00364	CDH2,COL3A1,CYP1A2,DSC2,NQO1
mut vs wt d702factor 2x q05		etoposide		chemical drug		-0.665		-0.093	-0.348	0.0299	BDNF,CD274,CDKN1A,CLCA2,CXCL10,CXCL3,DELEC1,IL1B,IL6,POU5F1,SLC2A1,SLC2A3,TNFAIP3,TNFSF10,WT1
mut vs wt d702factor 2x q05		MTOR	0.141	kinase		-0.664		-0.06	-0.423	0.034	ALDH1A3,AR,CASP1,CD274,CDKN1A,CXCL2,FBXO32,FST,HSD17B2,IL1B,IL6,INHA,KCND2,LDHA,NEURL1B,PDK4,PTH1R,SLC16A3,SLC2A1,SNAI2,TNFRSF10C,TNFSF10,VEGFA
mut vs wt d702factor 2x q05		CRHR1	-1.564	g-protein coupled receptor		-0.662		-0.049	-0.578	0.00763	KCNMA1,SLC2A1,SLC2A3,VEGFA
mut vs wt d702factor 2x q05		MAP2K3	0.28	kinase		-0.662		-0.173	-0.25	0.0105	CDKN1A,COL3A1,CXCL10,IL1B,IL6,IVL,TNFSF10,VEGFA
mut vs wt d702factor 2x q05		TLR8	0.737	transmembrane receptor		-0.659		-0.196	-0.235	0.0489	CXCL10,CXCL2,IL1B,IL6,VDR
mut vs wt d702factor 2x q05		STAT2	0.196	transcription regulator		-0.655		-0.14	-0.38	0.0136	CXCL10,GBP6,IFITM1,IFITM2,IL6,PITX2,TNFSF10
mut vs wt d702factor 2x q05		SPHK1	0.251	kinase		-0.654		-0.065	-0.51	0.0489	ACTA2,CDKN1A,IL1B,IL6,SLC2A1
mut vs wt d702factor 2x q05		GHR	-0.123	transmembrane receptor		-0.651		0.022	-0.699	0.000367	ACTA2,CDKN1A,IGFBP3,IL1B,IL6,ONECUT1,SNAI2,SOCS2,SPP1	Akt,CTNNB1,Creb,EGFR,EGR1,ERK1/2,FOS,FOXO1,GHR,HIF1A,IGF1,JUN,NFE2L2,NFKB1,NFKBIA,NFkB (complex),RELA,SMAD3,SP1,SPP1,STAT3
mut vs wt d702factor 2x q05		CDK9	-0.037	kinase		-0.651		-0.179	-0.254	0.000488	CCND2,CDKN1A,CXCL2,IL6,PDK4,STC2,TNFAIP3,VIM,WNT5A	ATF4,BRD4,CDK9,CTNNB1,Creb,DDIT3,HIF1A,JUN,MMP9,MYC,NFE2L2,NFKB1,NFKBIA,NFkB (complex),RELA,RNA polymerase II,RUNX2,SMAD3,STAT1,STAT3
mut vs wt d702factor 2x q05		PTAFR	-0.185	g-protein coupled receptor		-0.651		-0.117	-0.391	0.002	CDH2,CXCL2,IL1B,IL6,VIM	ARRB2,CTNNB1,Creb,Ige,JUN,MAPK1,NFATC2,NFKB1,NFKBIA,NFkB (complex),POU5F1,PPARG,PTAFR,RARA,RELA,SP1,STAT3,TP53,platelet activating factor
mut vs wt d702factor 2x q05		SUMO3	-0.481	other		-0.651		0.037	-0.733	0.0218	CCND2,CXCL10,IL6,MOXD1,TNC
mut vs wt d702factor 2x q05		S100A8	-0.912	other		-0.649		-0.05	-0.457	0.00196	ADAMTS1,ADAMTS5,APLN,CASP1,CD274,CP,CXCL10,CXCL2,CXCL3,ENTPD2,H19,IL1B,IL6,KCNMA1,ROBO2,SIX1,WT1	AHR,CEBPB,IL1B,IL22,IL6,JUN,NFKB1,NFKBIA,NFkB (complex),RELA,S100A8,SMAD3,STAT1,STAT3
mut vs wt d702factor 2x q05		CALR	0.116	transcription regulator		-0.648		-0.041	-0.535	9.96e-05	CDH2,CDKN1A,COL3A1,CRABP2,CXCL3,GJA1,GJA5,GJC1,MEF2C	AR,BRCA1,CALR,CTNNB1,Creb,EGR1,ERK1/2,ESR2,FOS,FOXO1,FOXO3,GATA2,GATA3,GATA4,JUN,MEF2C,MYC,NFKB1,NFkB (complex),PI3K (complex),SIRT1,SMAD3,SP1,STAT1,STAT3,TBX5,TP53
mut vs wt d702factor 2x q05		fenamic acid		chemical reagent		-0.645		-0.167	-0.024	1.03e-06	ABCC2,ADAMTS1,ANXA1,CP,EFEMP2,EMP3,GPNMB,GPX2,LCN2,PLA1A,PRTFDC1,SLC34A2,SPP1,VIM
mut vs wt d702factor 2x q05		KLF6	0.064	transcription regulator		-0.642		-0.022	-0.571	0.000509	ALOX5,CDH2,CDKN1A,CXCL2,CYP1A1,IL1B,IL6,NR5A1,PRDM1,TNFAIP3,VEGFA	AHR,CTNNB1,FOXM1,FOXO1,FOXO3,JUN,KLF6,NFKB1,NFKBIA,NFkB (complex),NKX3-1,PI3K (complex),PPARG,PTEN,RELA,SMAD3,SMAD4,STAT3,TCF,TP53
mut vs wt d702factor 2x q05		STAT1	0.474	transcription regulator		-0.642		-0.133	-0.036	0.00439	ALDH1A3,C1R,CASP1,CCND2,CCRL2,CD274,CDKN1A,CH25H,CXCL10,CXCL2,CXCL3,CYP1A2,DUOX2,EGLN3,GBP6,GREB1,IFITM1,IFITM2,IL1B,IL6,LCN2,PTN,SAA2,SLC2A2,SLC51B,TNFSF10,TYMP	AHR,CEBPB,CTNNB1,IFNG,IL1B,IL6,JUN,MYC,NFKB1,NFKBIA,NFkB (complex),PPARG,RELA,STAT1,STAT3,TP53
mut vs wt d702factor 2x q05		EGR1	-0.384	transcription regulator		-0.638		-0.144	-0.058	0.000514	ACTA2,AR,CCND2,CCR1,CDKN1A,CHGA,COL2A1,CXCL2,CXCL3,CXCL6,HPGD,IL1B,NDRG1,PNMT,SNAI2,SPP1,TIAM1,TNFSF10,VEGFA	CREBBP,CTNNB1,Creb,EGR1,EP300,ERK,ERK1/2,FOS,HDAC1,JUN,JUND,MMP9,MYC,NFKB1,NFkB (complex),PPARG,RELA,SMAD3,SP1,STAT3,TP53
mut vs wt d702factor 2x q05		SRC	-0.314	kinase		-0.637		-0.119	-0.175	6.92e-05	CCND2,CDKN1A,CTSV,CXCL10,CYP1A1,GJA1,IL6,NEUROG3,PLAUR,POU5F1,PTH1R,SLC2A1,SPP1,TNFRSF11A,VEGFA,VIM	AKT1,CEBPB,CTNNB1,Creb,EGR1,EP300,ERK1/2,FOS,FOXO3,HDAC1,JUN,MET,NFKB1,NFKBIA,NFkB (complex),P38 MAPK,SMAD3,SP1,SRC,STAT3,TP53,ZFP36
mut vs wt d702factor 2x q05		NDRG1	-3.049	kinase		-0.633		-0.005	-0.62	0.00443	CEACAM5,CXCL2,CXCL3,SNAI2,VEGFA,VIM	AHR,FOS,HDAC1,JUN,JUND,MYC,NDRG1,NFkB (complex),SMAD3,SMAD4,SMAD7,SP1,STAT3,TP53
mut vs wt d702factor 2x q05		CISH	-0.151	other		-0.632		0.083	-0.895	0.00115	CCRL2,CD101,CXCL10,CXCL3,IL1B,MYCN,PLAUR,PRDM1,RGCC,SPP1	CEBPB,CISH,CTNNB1,FOS,IL13,IL4,JUN,MYC,NFKB1,NFKBIA,NFkB (complex),PPARG,RELA,SMAD3,SP1,STAT1,STAT3,TP53
mut vs wt d702factor 2x q05		N-cor		group		-0.626		0.161	-0.979	0.0117	CCR1,CDKN1A,CRP,CXCL10,CXCL2,IGFBP3,IL1B,SCD,SNAI2,TBX1
mut vs wt d702factor 2x q05		HR	0.233	transcription regulator		-0.625		0.021	-0.67	0.000562	GJA1,HAL,IVL,LEF1,PREX2,PVT1,SOSTDC1,VDR
mut vs wt d702factor 2x q05		sphingosine-1-phosphate		chemical - endogenous mammalian		-0.617		-0.096	-0.353	0.0426	ACTA2,CCR3,COL3A1,CXCL10,CXCL2,IL6,KDR,VIM
mut vs wt d702factor 2x q05		Mapk		group		-0.616		-0.176	-0.047	5.4e-05	APLN,BDNF,CDKN1A,GJA1,HPGD,IL1B,IL6,ITGA4,ITGB7,MMP10,NPPB,SNAI2,SPP1,UGT1A1,VEGFA	CEBPB,Creb,EGR1,ERK1/2,ESR2,FOS,JUN,JUND,MYC,Mapk,NFKB1,NFKBIA,NFkB (complex),P38 MAPK,RELA,SP1,STAT3,TP53,ZFP36
mut vs wt d702factor 2x q05		SP1	-0.21	transcription regulator		-0.613		-0.17	0.127	1.07e-07	ACTA2,ADAMTS1,ADCY4,ADRA1B,AGTR1,AHRR,ALOX15B,ALOX5,ANKH,AR,BDNF,CCND2,CDH2,CDKN1A,CHGA,CKB,COL2A1,COL8A1,CRABP2,CRYAB,CXCL10,CXCL3,CYP1B1,CYP2B6,FES,FOXF2,GJA1,IGFBP3,IL1B,KCNQ2,KDR,MYCN,NDRG1,NES,NPR1,PDK1,PHOX2B,PLAUR,PNMT,POU5F1,PTH1R,PTN,SLC22A4,SLC2A1,SLC2A3,SNAP25,SPP1,TNC,TNFAIP3,TNFSF10,VDR,VEGFA,VIM	AHR,AR,CREBBP,CTNNB1,EGR1,EP300,FOXM1,HDAC1,JUN,KLF4,MYC,NFKB1,NFkB (complex),RELA,SIRT1,SMAD3,SMAD4,SMAD7,SP1,STAT3,TP53,TP73
mut vs wt d702factor 2x q05		SFTPA1	0.499	transporter		-0.607		0.074	-0.867	2.75e-05	AKR1C1/AKR1C2,CDH10,CXCL10,CXCL2,CXCL3,CYP1B1,IL1B,IL6,KCNMB4,KLF2,LGALS7/LGALS7B,LOX,PDK4	ARRB2,CEBPB,CTNNB1,NFE2L2,NFKB1,NFKBIA,NFkB (complex),RELA,SFTPA1,SREBF1,STAT1,STAT3,TLR2,TP53,cholesterol,lipid A,peptidoglycan
mut vs wt d702factor 2x q05		RIPK1	-0.179	kinase		-0.607		-0.109	-0.351	0.0129	CXCL10,CXCL2,IL1B,IL6,VEGFA,WNT5A
mut vs wt d702factor 2x q05		C5	0.022	cytokine		-0.605		-0.099	-0.27	0.00765	ACTA2,APCS,CRP,CXCL10,CXCL2,CXCL3,IL1B,IL6,ITGB2,NFIX,TNFAIP3,VEGFA	C3,C5,CXCL2,IL1,IL17A,ITGB2,JUN,NFKB1,NFKBIA,NFkB (complex),RELA,SMAD3,STAT1,STAT3
mut vs wt d702factor 2x q05		CDK5	0.342	kinase		-0.603		-0.065	-0.437	0.000491	BDNF,CDKN1A,CXCL2,IGFBP3,KCNMA1,NES,TNFAIP3	CDK5,CTNNB1,Creb,EGR1,ERK1/2,FOS,FOXM1,GATA2,GATA3,GATA4,Histone h3,JUN,KMT2A,MECP2,MED1,MEF2C,NFKB1,RELA,RNA polymerase II,SIRT1,SMAD4,SP1,STAT3,TBX5,TCF
mut vs wt d702factor 2x q05		tetradecanoylphorbol acetate		chemical drug		-0.581		-0.102	0.307	3.08e-08	ADAMTS1,AGTR1,AKR1B10,ALDH1A3,ALOX15B,ANXA1,ATP12A,BDNF,CASP1,CCND2,CCR3,CD70,CDKN1A,CH25H,CHGA,CSTA,CTSV,CXCL10,CXCL13,CXCL2,CXCL3,CXCL6,CYP1A1,CYP1A2,CYP2A6 (includes others),DIO2,DMBT1,FGFBP1,FST,GJA1,H19,HAPLN1,HAVCR1,HSD17B2,IGFBP3,IGFBP6,IL1B,IL6,INHBB,ITGA5,ITGB2,IVL,KLF2,KRTAP19-3,LCN2,LIPG,LOXL2,MARS2,MEIS2,MMP10,NCOA7,NPR3,NQO1,NR5A1,PABPC4L,PDE3B,PDK4,PDPN,PLAUR,PTH1R,PTPRB,PTPRG,S100A…	AHR,CEBPB,CTNNB1,EGF,ESR1,ESR2,IL1B,JUN,NFKBIA,NFkB (complex),P38 MAPK,RELA,SMAD3,STAT3,TNF,ZFP36,beta-estradiol,tetradecanoylphorbol acetate
mut vs wt d702factor 2x q05		ROR1	0.863	kinase		-0.578		-0.157	-0.144	4.48e-05	FSTL1,GAS6,ITGB2,NDRG1,SNAI2,TNNT2,TNS1,VIM	ERBB3,PGR,ROR1,SMAD2
mut vs wt d702factor 2x q05		Bvht		other		-0.577		-0.19	0.083	7.39e-05	ACTA2,AGTR1,ALDH1A3,CYGB,ITGA4,KDR,MEF2C,SNAI2,TBX1,TMOD1,TNNT2,VIM	Bvht,MESP1,NKX2-5,TBX5
mut vs wt d702factor 2x q05		HBEGF	-0.927	growth factor		-0.57		-0.14	-0.16	1.55e-05	AR,CCND2,GJA1,IGFBP3,LDHA,NES,NPPB,PDK4,SLC16A3,VEGFA	AR,Akt,Creb,EGR1,ERBB2,ERK1/2,FOS,FOSL1,FOXO1,HBEGF,HIF1A,Hif1,JUN,Mapk,NFE2L2,NFKB1,PPARG,SMAD3,SP1,STAT3,TP53,VHL
mut vs wt d702factor 2x q05		doxorubicin		chemical drug		-0.57		-0.064	-0.198	1.76e-05	ABCG2,ADAMTS1,ANXA1,AR,CASP1,CD274,CDKN1A,COL3A1,CP,CXCL2,CXCL6,DINOL,EFEMP2,EMP3,FBLN1,GPNMB,GPX2,IGFBP6,IGFBP7,IL1B,LCN2,MEF2C,NDRG1,NPPB,NQO1,NT5E,NTN1,PDE3A,PLA1A,PRTFDC1,RRM2B,SLC34A2,SPP1,TFAP2A,TNFRSF10C,TNFSF10,VEGFA,VIM,WT1	Akt,CEBPB,Creb,EGR1,FOS,FOXO1,IL6,JUN,MAPK7,MEF2C,NFE2L2,NFKB1,NFKBIA,NFkB (complex),RELA,SMAD3,SP1,STAT3,TNF,doxorubicin,prostaglandin E2
mut vs wt d702factor 2x q05		IRF6	-0.366	transcription regulator		-0.568		-0.098	-0.315	0.00629	ADAMTS5,ALOX15B,CDH2,IL1B,IL6,IVL,LCN2	AHR,CEBPB,Creb,EGR1,FOS,FOSL1,IL1,IRF6,JUN,Mapk,NFE2L2,NFKB1,NFKBIA,NFkB (complex),P38 MAPK,RELA,SMAD3,STAT3,ZFP36,cyclic AMP
mut vs wt d702factor 2x q05		bortezomib		chemical drug		-0.564		-0.017	-0.486	0.00227	CASP1,CCND2,CDKN1A,CRYAB,CXCL10,CXCL13,CXCL2,CXCR6,GPNMB,GREB1,IGFBP3,IL1B,IL6,ITGA4,PRDM1,SAA1,SRXN1,TNFSF10,VEGFA,VIM,WT1	AHR,CEBPB,CTNNB1,IL6,JUN,MYC,NFKB1,NFKBIA,NFkB (complex),PPARG,RELA,SMAD3,STAT1,STAT3,bortezomib
mut vs wt d702factor 2x q05		SELP	-1.953	transmembrane receptor		-0.563		-0.138	-0.201	0.000491	BST1,CDKN1A,CXCL2,CYP1B1,IL1B,IL6,PLAUR	CEBPB,EP300,IFNG,IL17A,IL4,JUN,NFKBIA,NFkB (complex),P38 MAPK,RELA,SELP,SMAD3,SP1,STAT1,STAT3,TP53,ZFP36,heparan sulfate
mut vs wt d702factor 2x q05		luteolin		chemical drug		-0.562		0.128	-0.843	0.0339	APOB,AR,CXCL10,CYP1A1,IL6,VEGFA
mut vs wt d702factor 2x q05		IL1		group		-0.561		-0.126	0.177	1.89e-09	ABCG2,ADAMTS1,ADAMTS5,AKR1C1/AKR1C2,AR,BDNF,CASP1,CDKN1A,COL2A1,CP,CRP,CXCL10,CXCL2,CXCL3,CYP1A1,CYP1A2,CYP2B6,DCN,FST,GJA1,H19,IL1B,IL6,ITGB2,KYNU,LOX,MMP10,S100A9,SAA1,SAA2,SAA4,SERPINB2,SFTPC,SLC2A1,SLC2A3,TNC,TNFAIP3,TNFSF10,TYMP,VEGFA,WNT1,WNT5A	AHR,CEBPB,IL1,IL6,JUN,NFKB1,NFKBIA,NFkB (complex),PPARG,RELA,SMAD3,STAT3,TNF
mut vs wt d702factor 2x q05		testosterone		chemical - endogenous mammalian		-0.559		-0.087	-0.102	0.000538	ADRA2A,ANXA1,APLN,AR,ATP12A,BDNF,BGN,CDH2,CDKN1A,CRP,CTSV,DCN,FST,GALR1,IGFBP3,IL1B,IL6,INHBB,KISS1R,NDRG1,PDE3B,SERPINA5,SRD5A1,SSTR2,SULT1E1,SYK,TF,UGT8,VIPR1,WNT5A	AR,BRCA1,CREB1,CTNNB1,ESR1,ESR2,FSH,JUN,MYC,NFkB (complex),NR1I2,PGR,SMAD3,SP1,STAT3,TP53,beta-estradiol,dihydrotestosterone,progesterone,testosterone
mut vs wt d702factor 2x q05		TLR7/8		group		-0.555		-0.176	-0.164	0.0294	KCNMA1,NPR1,PLAUR,TNFAIP3,VDR
mut vs wt d702factor 2x q05		NFIA	-0.27	transcription regulator		-0.554		-0.07	-0.398	0.000811	CDH2,CYP1A2,CYP2A6 (includes others),LOX,SFTPC,SLIT2
mut vs wt d702factor 2x q05		KITLG	0.541	growth factor		-0.551		-0.159	0.074	0.00158	ALOX5,CASP1,CDKN1A,CXCL2,CXCL3,GAS6,GJA1,IGFBP3,IL1B,IL6,KDR,LAPTM5,MAPK11,MEF2C,PARVB,PIWIL1,PTPRR,SNAI2,SYK,TACR1,TPH1,TUBB1	CEBPB,Ccl2,Creb,EGR1,ERK1/2,FOS,JUN,JUND,KITLG,MAPK14,MYC,NFKB1,NFKBIA,NFkB (complex),RELA,SP1,STAT3,TP53,TP73
mut vs wt d702factor 2x q05		C3	0.161	peptidase		-0.549		-0.109	-0.217	0.00229	ACTA2,APCS,CRP,CXCL10,CXCL2,CXCL3,IL1B,IL6,LCN2,VEGFA	AHR,ARRB2,C3,C5,CTNNB1,Creb,IL10,IL1B,NFE2L2,NFKB1,NFKBIA,NFkB (complex),RELA,SREBF1,STAT3,TP53,cholesterol
mut vs wt d702factor 2x q05		GNRH1	-0.687	other		-0.548		-0.092	-0.328	0.0104	FST,IL1B,INHA,INHBB,KISS1R,NES,NR5A1
mut vs wt d702factor 2x q05		chloroquine		chemical drug		-0.545		-0.017	-0.495	0.00119	ADAMTS5,CXCL10,GJA1,IL1B,IL6,NT5E,TNFSF10,ULBP2,VEGFA	CEBPB,CXCR4,IL10,Interferon alpha,JUN,NFKB1,NFKBIA,NFkB (complex),P38 MAPK,RELA,STAT1,STAT3,TP53,VHL,ZFP36,chloroquine
mut vs wt d702factor 2x q05		IFNB1	-1.217	cytokine		-0.543		-0.086	-0.188	6.99e-05	BTN3A3,CASP1,CD274,CDH2,CDKN1A,CH25H,CRYAB,CXCL10,CXCL2,CXCL3,CXCL6,CYP1A1,CYP1A2,GBP6,IFITM1,IL1B,IL6,NFIX,NID2,NMI,NNMT,PDK4,PRDM1,SERPINB2,SPP1,TNFSF10,VDR,XIST	AHR,CEBPB,IFNAR1,IFNB1,IL1B,Interferon alpha,JUN,NFKB1,NFKBIA,NFkB (complex),RELA,SMAD3,STAT1,STAT3,STAT4,TNF
mut vs wt d702factor 2x q05		ADORA2B	0.878	g-protein coupled receptor		-0.541		-0.073	-0.379	0.00508	CXCL2,CXCL3,IL1B,IL6,SPP1,VEGFA	ADORA2B,ARRB2,CEBPB,CTNNB1,Ccl2,IL10,JUN,NFKB1,NFKBIA,NFkB (complex),P38 MAPK,PPARG,RELA,STAT3,TP53,ZFP36
mut vs wt d702factor 2x q05		gentamicin C		chemical drug		-0.535		-0.165	0.084	3.91e-07	ABCC2,ADAMTS1,ANXA1,CP,EFEMP2,EMP3,GPNMB,GPX2,LCN2,PLA1A,PRTFDC1,SLC34A2,SPP1,VIM
mut vs wt d702factor 2x q05		cyclosporin A		biologic drug		-0.535		0.058	-0.882	2.38e-05	ABCC2,ACTA2,AGTR1,ANXA1,APOB,APOD,AVPR1A,BATF,BDNF,BGN,CASP1,CD200,CDKN1A,CP,EFEMP2,EMP3,F5,FREM2,FST,GJA1,GPNMB,GPX2,IL1B,IL6,ITGB7,KDR,LCN2,PDE3B,PRTFDC1,S100A9,SCD,SLC34A2,SPP1,TFEC,TNFSF10,VEGFA,VIM,WNT5A,XCL1	AGT,CEBPB,FOXO3,IL6,JUN,NFKB1,NFKBIA,NFkB (complex),PPARG,RELA,SMAD3,STAT3,TNF,TP53,TP63,cyclosporin A,doxorubicin
mut vs wt d702factor 2x q05		HMGA1	-0.069	transcription regulator		-0.531		-0.059	-0.307	0.00179	ACTA2,CCND2,CRYAB,FSTL1,GNA15,H19,IGFBP3,IGFBP7,IL6,KLF2,NFIX,PTH1R,SYK,TFEB,ZFP57	EGR1,EP300,HDAC1,HIF1A,HMGA1,Hdac,IL4,JUN,MYC,NFkB (complex),SMAD3,SP1,STAT3,TP53,TP63,TP73
mut vs wt d702factor 2x q05		dibenzoylmethane		chemical toxicant		-0.525		0.098	-0.654	4.6e-05	CDKN1A,CYP1A1,CYP1A2,CYP1B1	AHR,ARNT,CEBPB,HIF1A,RELA,TP53,dibenzoylmethane
mut vs wt d702factor 2x q05		SPP1	2.335	cytokine		-0.523		-0.122	-0.093	0.00557	ABCG2,CCL15,CDH2,CDKN1A,CXCL2,CXCL3,CXCL6,DSP,EPDR1,IL1B,IL6,LOX,SNAI2,SPP1,VEGFA,VIM	AHR,CTNNB1,Creb,IL17A,IL1B,JUN,MMP9,MYC,NFE2L2,NFKB1,NFKBIA,NFkB (complex),RELA,SMAD3,SPP1,STAT1,STAT3
mut vs wt d702factor 2x q05		ERBB3	0.006	kinase		-0.52		-0.026	-0.435	0.00125	ACTA2,BGN,CCND2,CDKN1A,FSTL1,GAS6,ITGB2,NDRG1,TNC,TNNT2,TNNT3,TNS1,VEGFA	AR,Akt,EGFR,EGR1,ERBB2,ERBB3,ERK,FOXO1,HIF1A,JUN,NFKB1,NFkB (complex),NRG1,PPARG,RELA,SMAD3,SP1,STAT3,TP53
mut vs wt d702factor 2x q05		tretinoin		chemical - endogenous mammalian		-0.514		-0.064	0.139	6.86e-10	ABCA12,ADAMTS5,AGTR1,ALDH1A3,ALOX5,ANXA1,APCDD1,APLN,APOA2,APOD,ASB2,ATOH8,ATP6V0A4,C20orf197,CASP1,CCND2,CCR1,CCRL2,CD101,CD274,CD70,CDH2,CDKN1A,CFP,CHRM2,CNR1,COL2A1,COL3A1,COL9A2,CP,CPA1,CRABP2,CTNNA3,CXCL10,CXCL2,CXCL6,CYP1A1,CYP1A2,CYP2B6,CYP2W1,CYP4B1,DAAM2,DCN,DIO2,DMC1,DPYSL3,DSP,EMP3,FBN2,FOXC1,FST,GAS7,GJA1,GPR158,GPX2,HOXA3,IFITM1,IGFBP3,IGFBP6,IGFBP7,IL1B,IL6,ITGA4,ITGB2,ITGB7,IVL,JAM…	CEBPB,CTNNB1,EGF,FOXM1,JUN,MYC,NFKBIA,NFkB (complex),P38 MAPK,SMAD3,SMAD4,STAT1,STAT3,TCF,TNF,ZFP36,tretinoin
mut vs wt d702factor 2x q05		Calmodulin		group		-0.509		-0.098	-0.274	0.0392	BDNF,EPHA6,KDR,LGI3,LINGO1,SYT2
mut vs wt d702factor 2x q05		vemurafenib		chemical drug		-0.501		-0.094	-0.301	0.00515	CD274,GPNMB,IL1B,IL6,VEGFA	CEBPB,CTNNB1,Creb,EGFR,EGR1,ERK1/2,FOS,HIF1A,JUN,MYC,NFKB1,NFKBIA,NFkB (complex),PIK3R1,RAF1,RELA,SP1,STAT1,STAT3,TP53,vemurafenib
mut vs wt d702factor 2x q05		DDIT3	0.632	transcription regulator		-0.5		-0.023	-0.421	0.00158	ERO1A,IL1B,IL6,IVL,LCN2,LOX,NDRG1,PDPN,RGS4,SH3RF3,SNAI2,TENM4,VIM	BCL2,CEBPA,CEBPB,CTNNB1,Ca2+,Creb,DDIT3,FOS,GLI1,JUN,NFKB1,NFKBIA,NFkB (complex),PPARG,RELA,SP1,STAT3,TNF,TP53
mut vs wt d702factor 2x q05		MRTFA	-0.291	transcription regulator		-0.494		-0.045	-0.343	0.00502	ACTA2,CD24,CXCL6,HPGD,ITGA5,IVL,LCN2,NPPB,S100A9,SERPINB2,SPOCK3,SULT1E1,TBX1,TNC,TUBB1,YPEL1	Akt,EGR1,FOXO1,MRTFA,NFKB1,SMAD3,SP1
mut vs wt d702factor 2x q05		IHH	-0.363	enzyme		-0.493		-0.108	-0.192	0.000344	CXCL10,IL6,KDR,MEF2C,PTH1R,SMO,SPP1,VEGFA
mut vs wt d702factor 2x q05		LPL	-0.16	enzyme		-0.493		-0.059	-0.362	0.0268	APOB,IL1B,IL6,PDK4,SLC2A1,VEGFA
mut vs wt d702factor 2x q05		PGF	-0.822	growth factor		-0.485		-0.133	-0.196	0.00158	ALOX5,CASP1,CCL28,DCN,FST,IL1B,IL6	CEBPB,Creb,EGR1,ERK1/2,FOS,FOSL1,FOXO1,FOXO3,JUN,MAPK1,Mapk,NFE2L2,NFKB1,NFkB (complex),NOTCH1,P38 MAPK,PGF,POU5F1,PPARG,RARA,SP1,STAT3,Vegf,ZFP36
mut vs wt d702factor 2x q05		AKT2	0.107	kinase		-0.48		-0.062	-0.359	0.0268	ACTA2,CDKN1A,MYCN,NQO1,SEMA6D,VIM
mut vs wt d702factor 2x q05		MOG	0.238	other		-0.475		-0.129	-0.194	0.0291	BDNF,CCR1,CD274,CXCL10,CXCL2,IL6
mut vs wt d702factor 2x q05		CCR2	-0.675	g-protein coupled receptor		-0.472		-0.123	-0.047	0.000354	BGN,CCR1,COL14A1,CXCL10,CXCL13,CXCL2,CXCL3,CXCL6,DCN,FBLN1,IL1B,IL6,P4HA1,TNC	CCR2,CEBPB,CTNNB1,Ccl2,HIF1A,IL6,JUN,MYC,NFKBIA,NFkB (complex),RELA,SMAD3,SMAD4,STAT1,STAT3,TGFB1,TNF,TP53
mut vs wt d702factor 2x q05		allopurinol		chemical drug		-0.471		-0.084	-0.115	1.52e-07	ABCC2,ADAMTS1,ANXA1,BDNF,CP,CXCL10,EFEMP2,EMP3,GPNMB,GPX2,IL1B,LCN2,PLA1A,PRTFDC1,SLC2A1,SLC34A2,SPP1,VIM	AGT,Akt,CTNNB1,EGR1,FOS,FOXO1,HIF1A,JUN,MYC,NFKB1,NFKBIA,NFkB (complex),PPARG,RELA,SMAD3,SP1,SRC,STAT3,TP53,XDH,allopurinol
mut vs wt d702factor 2x q05		MAPK8	-0.301	kinase		-0.471		-0.074	-0.189	0.000414	APOD,CDH2,CDKN1A,CRP,CSTA,CYP1A1,DIO2,IL1B,IL6,NEFL,NPPB,PLAUR,PTX3,RGS4,TACR1,TNFAIP3,VDR,WNT5A	AHR,CEBPB,FOS,IL1B,JUN,JUND,MAPK8,MYC,NFKB1,NFKBIA,NFkB (complex),P38 MAPK,PPARG,RELA,SMAD3,SP1,STAT3,TP53,ZFP36
mut vs wt d702factor 2x q05		indomethacin		chemical drug		-0.466		-0.056	-0.222	2.19e-05	ADAMTS1,ADAMTS5,ALOX5,ANXA1,BDNF,CDKN1A,CP,CYP2B6,EFEMP2,EMP3,GPNMB,GPX2,IL1B,IL6,LCN2,LOXL2,PLA1A,PLAUR,PRTFDC1,SLC15A1,SLC34A2,SPP1,TACR1,VDR,VEGFA,VIM	AHR,CEBPA,CEBPB,Creb,EGR1,EP300,ERK1/2,FOS,HDAC1,IL1B,IL6,JUN,NFKB1,NFKBIA,NFkB (complex),PPARG,RELA,SMAD3,SP1,STAT3,TP53,indomethacin
mut vs wt d702factor 2x q05		CRH	-0.864	cytokine		-0.46		-0.101	-0.1	1.21e-08	AR,BDKRB2,BDNF,DIO2,HPGD,IL1B,IL6,IVL,KCNMA1,PNMT,RAMP2,SLC2A1,SLC2A3,TPH1,VDR,VEGFA	AHR,CEBPB,CREBBP,CRH,CRHR2,CTNNB1,Creb,ESR1,ESR2,JUN,JUND,MAPK14,NCOA2,NFkB (complex),P38 MAPK,Pkc(s),SP1,STAT3,TP53,TP73,ZFP36
mut vs wt d702factor 2x q05		USF2	-0.013	transcription regulator		-0.46		-0.176	-0.07	0.0174	ACP5,APLN,APOA2,IGFBP3,NR5A1,P4HA1,SPP1
mut vs wt d702factor 2x q05		RARA	0.143	ligand-dependent nuclear receptor		-0.456		-0.001	-0.449	4.12e-05	ABCC2,ADH1C,ALOX5,AR,ATP6V0A4,CD24,CDKN1A,CEACAM5,CENPF,CLMN,CP,CRABP2,CTNNA3,FOXC1,GPR158,GREB1,HOXA3,IGFBP6,IL6,ITGA4,MYCN,NTN1,PITX2,POU5F1,SAA1,SAMD9,SHROOM1,SLC2A2,SPP1,TFAP2A,TMSB15A,YPEL1,ZFP42	CREBBP,CTNNB1,EP300,FOXM1,JUN,KLF4,MYC,NCOA2,POU5F1,PPARG,RARA,RARB,RXRA,SMAD4,SP1,STAT3,TCF,THRB,TP53,tretinoin
mut vs wt d702factor 2x q05		oligomycin		chemical - endogenous non-mammalian		-0.447		0.053	-0.567	5.2e-05	CCND2,CXCL10,IL1B,IL6,KDR	AKT1,CEBPB,FOXO3,IL18,JUN,MAP3K7,NFE2L2,NFKB1,NFKBIA,NFkB (complex),RAC1,RELA,SP1,SREBF1,STAT3,STAT4,TP53,cholesterol,oligomycin
mut vs wt d702factor 2x q05		PDE5A	-0.398	enzyme		-0.447		-0.065	-0.301	0.000293	IL1B,IL6,PDE3A,PDE4B,S100A9	CREB1,FOS,FOSL1,JUN,Mapk,NFE2L2,NFKB1,NFKBIA,NFkB (complex),PDE5A,RELA,pentoxifylline
mut vs wt d702factor 2x q05		NTRK2	-0.297	kinase		-0.447		-0.164	-0.079	0.000322	ABCG2,BDNF,CASP1,CCND2,CDKN1A,MYCN,SNAP25,SPP1,TNFSF10,VEGFA,VIM	AKT1,Akt,BDNF,CEBPB,CREB1,Creb,EGR1,ERK1/2,FOS,FOXO1,FOXO3,HIF1A,JUN,MEF2C,MYC,NFKB1,NFkB (complex),NTRK2,SMAD3,SP1,SRC,TP53
mut vs wt d702factor 2x q05		LGR5	0.068	transmembrane receptor		-0.447		-0.14	-0.135	0.0016	AKR1C3,CYP1A2,HAL,PLBD1,SLC13A3
mut vs wt d702factor 2x q05		bromobenzene		chemical toxicant		-0.447		-0.013	-0.418	0.00968	ABCC2,CDKN1A,CDO1,CTSV,CYP1A2,CYP2B6,NQO1,TUBB2B
mut vs wt d702factor 2x q05		TIMP1	0.074	cytokine		-0.447		-0.042	-0.354	0.0139	A4GALT,CDKN1A,IGFBP3,PLAUR,PLTP
mut vs wt d702factor 2x q05		Yaf2		transcription regulator		-0.447		0.196	-0.885	0.0196	KDR,LEF1,PITX2,SLC26A9,SLC6A13
mut vs wt d702factor 2x q05		mevalonic acid		chemical - endogenous mammalian		-0.447		-0.021	-0.401	0.0218	CYP2B6,IL1B,KLF2,PCSK9,VEGFA
mut vs wt d702factor 2x q05		KCNK9	-0.33	ion channel		-0.447		0.043	-0.543	0.0294	ACVR1C,LCN2,NEFL,SLC16A3,SSTR2
mut vs wt d702factor 2x q05		LDLR	-0.588	transporter		-0.446		0.022	-0.502	0.00563	APOB,BGN,CCR1,CCR3,CD274,CDKN1A,CENPF,GAS6,GJA1,GJA5,IL1B,IL6,LCN2,PCSK9,PLTP,SCD,SLC2A1,SPP1,VIPR1	APOE,CEBPB,CTNNB1,FOXO3,IFNG,JUN,LDLR,NFE2L2,NFKB1,NFKBIA,NFkB (complex),NR5A2,PPARG,PPARGC1A,RELA,SREBF1,STAT1,STAT3,TNF,cholesterol
mut vs wt d702factor 2x q05		IGF1	0.286	growth factor		-0.433		-0.094	0.125	1.26e-05	ACTA2,AKR1C1/AKR1C2,BDNF,BGN,CCND2,CD70,CDKN1A,CHGA,COL2A1,COL3A1,CXCL6,DCLK1,FBXO32,FOXE1,HAPLN1,IGFBP3,IGFBP6,IL1B,IL6,INHA,ITGA5,KCNQ2,LARP6,LCN2,LDHA,MYCN,NEUROG3,NR5A1,NTN1,PDE3A,PLAUR,PTH1R,SCD,SLC1A6,SLC2A1,SNAI2,SPP1,SRD5A1,TF,VEGFA,VIM,WT1	AHR,AKT1,CEBPB,CTNNB1,Creb,EGR1,ERK1/2,FGF2,FOS,FOXO3,IGF1,JUN,MYC,NFKB1,NFKBIA,NFkB (complex),SMAD3,SMAD4,SMAD7,SP1,STAT3,TNF,TP53
mut vs wt d702factor 2x q05		CFTR	-0.048	ion channel		-0.426		0.015	-0.473	0.00946	CXCL3,CYP2B6,DMBT1,GPX2,HPGD,HSD17B2,SAA1,SCD,TNFAIP3	CFTR,NFKB1,NFKBIA,NFkB (complex),PPARG,RELA,STAT3
mut vs wt d702factor 2x q05		FEV		transcription regulator		-0.426		-0.187	0.13	0.0118	ADRA1B,NFIX,NMNAT2,NTN1,RORB,SLIT2,TACR1,TPH1,VIM
mut vs wt d702factor 2x q05		SERPINF1	-0.863	other		-0.424		0.012	-0.451	0.00275	ACTA2,BDNF,CRYAB,ENO2,LOXL1,LOXL2,TNFSF10,VIM	AHR,CTNNB1,FGF2,FOXM1,HDAC1,JUN,MYC,NFKB1,NFKBIA,NFkB (complex),PPARG,RELA,RXRA,SERPINF1,SMAD3,SMAD4,SP1,STAT3,TCF,TP53
mut vs wt d702factor 2x q05		PPP3CA	-0.011	phosphatase		-0.418		-0.131	-0.129	0.0075	B3GAT1,CDH2,CDKN1A,CRYAB,CTSV,PDPN,SPP1,TF,VIM	CEBPB,CTNNB1,FOXO1,IFNG,JUN,NFATC1,NFATC4,NFkB (complex),NR4A1,PPP3CA,SP1,STAT1,STAT3,TP53,cyclosporin A
mut vs wt d702factor 2x q05		MAPK1	0.191	kinase		-0.416		-0.002	-0.403	3.53e-09	ADH1C,ALOX15B,AR,BCL11A,BDNF,BTN3A3,CDH2,CDKN1A,CHST2,CRABP2,CSTA,CTNNA2,DCN,DEPTOR,EGLN3,FBXO32,FES,FLNC,GNG2,HSD17B2,IFITM1,IGFBP6,IGFBP7,IGSF9B,IL1B,IL6,ITGA5,LOX,MNS1,MX2,NMI,NT5E,OLFML2A,PITX2,PLAAT2,POU5F1,SLITRK6,SOCS2,SPP1,STC1,TNFSF10,VDR,VIM,ZFP42	AR,CTNNB1,EGR1,EP300,ESR1,FOS,HDAC1,JUN,JUND,MAPK1,MET,MYC,NFKBIA,NFkB (complex),PPARG,PRL,RELA,RXRA,SMAD3,SP1,STAT3,STAT5B,TP53
mut vs wt d702factor 2x q05		FGF4		growth factor		-0.415		-0.098	-0.228	0.0152	CDKN1A,SCD,SOSTDC1,VEGFA
mut vs wt d702factor 2x q05		MEF2D	-0.083	transcription regulator		-0.415		-0.114	-0.119	0.0335	BDNF,COL3A1,KLF2,NQO1,SRXN1,SYK,VIM
mut vs wt d702factor 2x q05		3M-002		chemical reagent		-0.413		-0.005	-0.396	0.00247	CD300A,CXCL10,CXCL3,DIO2,GABRR1,GJA5,GPNMB,IL1B,IL6,MUSK,RGS4,SPRED3,TNFSF10	3M-002,CEBPB,IKBKG,IL10,JUN,NFKB1,NFKBIA,NFkB (complex),P38 MAPK,PPARG,RELA,STAT1,STAT3,TLR7,ZFP36
mut vs wt d702factor 2x q05		AGT	-0.013	growth factor		-0.412		-0.1	0.231	6.82e-07	ACTA2,ADAM23,ADAMTS5,ADH1C,AGTR1,ANXA1,APLN,BDKRB2,BDNF,BGN,CCND2,CDKN1A,CGREF1,CNR1,COL3A1,CP,CRABP2,CRP,CXCL10,CXCL2,CXCL3,GJA1,IGFBP3,IL1B,IL6,INHBB,ITGA5,ITGB7,KCND3,KCNJ2,KDR,LCN2,LIMD2,NDRG1,NMNAT2,NOVA1,NPPB,NPR1,NPR3,PDE3A,SERPINB2,SLC2A1,SPP1,STC1,VEGFA,VIM	AGT,CEBPB,CTNNB1,FGF2,FN1,JUN,MYC,NFKB1,NFKBIA,NFkB (complex),PPARG,RELA,SMAD3,SMAD4,SP1,STAT3,TNF,TP53,Tgf beta
mut vs wt d702factor 2x q05		DGCR8	-0.396	enzyme		-0.412		-0.019	-0.365	0.0208	ACTA2,BDNF,GJA1,SMO,SMOC1,TNC
mut vs wt d702factor 2x q05		APOE	0.517	transporter		-0.41		0.113	-0.768	0.00446	ACTA2,ADAMTS5,APOB,APOD,BGN,CASP1,CCND2,CTSV,CXCL3,GAS7,IGFBP6,IL1B,IL6,ITGA5,LARGE1,LCN2,LIPG,NMNAT2,PCSK9,PTX3,S100A9,SLC6A1,SPP1,SULT1A3/SULT1A4,TIAM1	AHR,APOE,CD44,CEBPB,CTNNB1,IL1B,IL6,Immunoglobulin,JUN,NFKBIA,NFkB (complex),NR4A1,RELA,SCARB1,SMAD2,SMAD3,STAT1,STAT3
mut vs wt d702factor 2x q05		ADCYAP1	0.054	other		-0.409		-0.046	-0.16	7.49e-09	BDNF,CHGA,CNN3,COL3A1,COL5A1,CXCL10,CXCL2,CXCL3,DCDC2,FRMPD2,FRRS1,FST,GABRB2,GREB1,GREM2,GRP,HAPLN1,IL6,MAN1A1,MAPK4,NHLH2,NPR3,NQO1,NR5A1,PDE10A,PNMT,PTPRR,RGCC,SLC2A1,SNAP25,TSHZ1,TUBB2B	ADCYAP1,CEBPB,ERK,FOS,JUN,MAPK7,MEF2C,NFE2L2,NFKBIA,NFkB (complex),P38 MAPK,PPARG,RELA,SERPINE2,SMAD3,STAT3,TNF,ZFP36
mut vs wt d702factor 2x q05		FSH		complex		-0.403		-0.057	-0.136	4.74e-06	ACP5,ACTA2,ADAMTS1,ADAMTS16,APLN,AR,BCL11A,BDNF,CCND2,CDH2,CDKN1C,CEACAM5,CH25H,CTSV,FLNC,FST,GPRC5B,IGFBP3,IL6,INHA,INHBB,ITGA5,LOX,MAMLD1,NR5A1,PLA1A,PPFIA4,RGS4,RGS5,SLC2A1,SNAP25,SRD5A1,SSTR2,TF,TNFAIP3,VEGFA,WT1,ZNF519	AR,CG,CTNNB1,Creb,EGR1,ESR1,ESR2,FOS,FSH,HIF1A,IGF1,INHBA,JUN,NFkB (complex),NR1I2,PGR,SMAD2,SMAD3,SMAD7,SP1,STAT3,beta-estradiol,progesterone
mut vs wt d702factor 2x q05		TEK	-0.136	kinase		-0.391		-0.196	0.043	9.95e-05	APLN,CDKN1A,CLDN5,IL6,S100A9,VEGFA	AKT1,CEBPB,CTNNB1,Creb,EGR1,ERK,ERK1/2,FOS,FOXO1,FOXO3,JUN,MYC,NFKB1,NFkB (complex),PI3K (complex),PPARG,RELA,SMAD3,SP1,STAT1,STAT3,TEK,TP53
mut vs wt d702factor 2x q05		ANXA2	-0.274	other		-0.391		0.032	-0.46	0.0139	CDKN1A,IGFBP3,IL6,PCSK9,ZMAT3
mut vs wt d702factor 2x q05		HOXA10	-1.493	transcription regulator		-0.387		0.061	-0.639	0.000865	CDKN1A,CLDN5,COL3A1,CSTA,CTSV,FST,GAS6,GJA1,IGFBP3,LCN2,MAPK12,MEIS2,MYCN,PCP4,PDPN,SCD,SFRP4,SLC27A6
mut vs wt d702factor 2x q05		bleomycin		chemical drug		-0.386		-0.172	0.301	0.000752	ACTA2,CCN4,CCR1,CDKN1A,COL3A1,CXCL10,CXCL2,DCN,FRZB,IL13RA2,IL1B,IL6,LOX,NPPB,PLA1A,RGCC,SOCS2,SPP1,WNT5A	CEBPB,HIF1A,IL6,JUN,NFKBIA,NFkB (complex),NT5E,RELA,SMAD3,SMAD4,SP1,STAT3,TGFB1,TNF,TP53,Tgf beta,bleomycin
mut vs wt d702factor 2x q05		TRPS1	-0.64	transcription regulator		-0.378		0.084	-0.6	0.00505	CENPF,ENPP1,ENPP6,GREB1,KCNMA1,SNAI2,VDR
mut vs wt d702factor 2x q05		PTPRJ	0.06	phosphatase		-0.378		-0.18	0.099	0.00699	CD70,CXCL2,CXCL3,IL6,PLA1A,PLAUR,SLA	CTNNB1,Creb,EGR1,ERK1/2,FOS,HIF1A,JUN,MET,MMP9,MYC,NFKB1,NFKBIA,NFkB (complex),PTPRJ,RELA,SP1,SRC,STAT1,STAT3
mut vs wt d702factor 2x q05		DNMT1	-0.282	enzyme		-0.375		0.08	-0.582	2.42e-05	ADAMTS9-AS2,CDKN1A,CNR1,DAB1,EPDR1,FOXF2,KLF2,POU5F1,PRDM16,PTN,SERPINB2,SFRP4,WNT1,WNT5A,XIST	Akt,DNMT1,EGR1,ESR1,FOXO1,GATA4,GATA6,Histone h3,KMT2A,MED1,NFKB1,POU5F1,RELA,RNA polymerase II,SMAD3,SNAI2,SOX2,SP1
mut vs wt d702factor 2x q05		MACROH2A1	0.068	other		-0.359		0.051	-0.541	3.12e-07	ALDH1A3,ASB2,CCND2,CDKN1A,CDKN1C,CTHRC1,FGD3,IL6,KRT23,MAGEL2,POU5F1,SERPINA7,SERPINB2,SLC2A1,SLC2A2,SOCS2	EZH2,GATA3,HDAC1,Histone h3,KMT2A,MACROH2A1,MED1,NFKB1,RELA,RNA polymerase II,SP1,STAT3
mut vs wt d702factor 2x q05		SPZ1	-0.705	transcription regulator		-0.359		-0.177	0.032	0.0016	CDH2,SNAI2,VEGFA,VIM,WNT5A	EP300,NOTCH1,PPARGC1A,SPZ1,TP53,TWIST1
mut vs wt d702factor 2x q05		rolipram		chemical drug		-0.359		0.006	-0.372	0.0176	ANXA1,BDNF,IL1B,IL6,PDE4B
mut vs wt d702factor 2x q05		CRHR2	-0.032	g-protein coupled receptor		-0.346		0.02	-0.389	0.00032	CXCL2,IL6,KCNMA1,SLC2A1,SLC2A3,VEGFA	CREB1,CRHR2,CTNNB1,Creb,EGR1,FSH,HGF,JUN,NFKB1,NFKBIA,NFkB (complex),PPARG,RELA,SMAD3,STAT3,VEGFA
mut vs wt d702factor 2x q05		CHUK	0.181	kinase		-0.342		-0.159	0.371	4.74e-06	CCR1,CDKN1A,CH25H,CHST4,CLDN8,CP,CTSF,CXCL10,CXCL13,CXCL2,CXCL3,CXCL6,DCN,FOXF2,IGFBP6,IL1B,IL6,LCN2,MMP10,PTX3,SERPINB2,SPP1,TNFAIP3,VEGFA,ZNF395	CEBPB,CHUK,IKBKB,IKBKG,JUN,NFKB1,NFKBIA,NFkB (complex),RELA,STAT1,STAT3,TNF,TP53,TP63
mut vs wt d702factor 2x q05		vinblastine		chemical drug		-0.339		-0.168	0.059	0.00174	AR,CDKN1A,CHST4,CYP1A1,IL1B,IL6	AHR,BCL2,CHUK,Creb,ESR1,FOS,GLI1,JUN,JUND,MAPK8,MYC,NFKB1,NFKBIA,NFkB (complex),Pkc(s),RELA,SMAD3,SP1,TP53,vinblastine
mut vs wt d702factor 2x q05		IL17R		complex		-0.339		-0.152	-0.04	0.00623	CXCL10,CXCL3,CXCL6,S100A9	AHR,CEBPB,Creb,EGR1,ERK1/2,FOS,IL17R,JUN,NFKB1,NFKBIA,NFkB (complex),P38 MAPK,PPARG,RELA,SMAD3,SP1,STAT3,ZFP36
mut vs wt d702factor 2x q05		OSM	0.737	cytokine		-0.338		-0.071	0.22	9.92e-15	ACSL5,ACTA2,ADAMTS1,ADAMTS5,AKR1B10,AKR1C1/AKR1C2,AKR1C3,ANXA1,ARTN,C1R,CCND2,CD24,CDA,CDH2,CDKN1A,CH25H,COL2A1,COL3A1,COL8A1,CRP,CTSV,CXCL10,CXCL13,CXCL2,CXCL3,CXCL6,CYP1B1,DSC2,EMP3,EVPL,FLG,FOXC1,GAS7,GMPR,GPNMB,IGFBP3,IGFBP6,IL1B,IL6,LARGE1,LCN2,MMP10,MUSK,OLFML2A,PDPN,PITX2,POU5F1,PRDM1,PTPRZ1,RASL11A,S100A9,SAA1,SLC15A1,SLC16A3,SPP1,TAT,TCN1,TM4SF1,TNC,TNFRSF11A,TYMP,UGT1A1,ULBP2,VDR,VEGFA,…	CEBPA,CEBPB,Creb,EGR1,ERK1/2,FOS,HIF1A,IL6,IL6R,JUN,NFKB1,NFKBIA,NFkB (complex),OSM,PPARG,RELA,SMAD3,SMAD4,SP1,STAT1,STAT3,TGFB1,TP53
mut vs wt d702factor 2x q05		ZNF217	-0.424	transcription regulator		-0.333		0.154	-0.796	8.44e-05	COL8A1,HAPLN1,IGDCC3,IGFBP3,MYCN,NEFL,NLGN1,NMNAT2,NMU,NRXN3,SEMA3A,SOCS2
mut vs wt d702factor 2x q05		NEUROG1		transcription regulator		-0.333		0.04	-0.455	0.00168	CCND2,COL3A1,DSP,FGF9,IL6,MFAP4,PAPPA,RIPOR2,TACR1
mut vs wt d702factor 2x q05		KLF11	-1.072	transcription regulator		-0.333		-0.051	-0.179	0.00349	ACSL5,ACTA2,ADAMTS1,CHRM3,CHRNA2,COL3A1,DCN,DIO2,IL13RA2,IL1B,LOX,PDK4,VEGFA
mut vs wt d702factor 2x q05		MAPK14	-0.298	kinase		-0.331		-0.113	0.118	0.00141	ACP5,ACTA2,CRP,CRYAB,CXCL10,FGFBP1,GJA1,IL1B,IL6,IVL,KDR,LEF1,MAPK11,MEF2C,PLAUR,SPP1,VDR,VEGFA	CEBPB,CTNNB1,EGFR,FGF2,FOS,HIF1A,JUN,JUND,MAPK14,MYC,NFkB (complex),P38 MAPK,RELA,SMAD3,SMAD4,SP1,STAT3,TGFB1,TP53,ZFP36
mut vs wt d702factor 2x q05		CCL2	-0.732	cytokine		-0.33		-0.081	-0.135	0.0403	ACTA2,CXCL10,CXCL3,EGLN3,IL1B,IL6,ITGA5,LCN2
mut vs wt d702factor 2x q05		PTGS2	-0.806	enzyme		-0.328		-0.077	-0.042	0.00261	ADGRL3,ANXA1,CDKN1A,CHGA,CXCL10,CXCL3,CYP1B1,IGFBP3,IL1B,IL6,KDR,KRT23,NTN1,STC1,TET1,TNFSF10,VEGFA	CTNNB1,Creb,FOXO1,FOXO3,Histone h3,JUN,KMT2A,MED1,NFE2L2,NFKB1,NFKBIA,NFkB (complex),NKX3-1,PI3K (complex),PTEN,PTGS2,RELA,RNA polymerase II,SP1,STAT3,TP53,acetaminophen,aspirin
mut vs wt d702factor 2x q05		WNT1	1.894	cytokine		-0.327		-0.134	0.111	0.0109	ACTA2,APCDD1,CCN4,CCND2,CD24,CDKN1A,COL3A1,LEF1,MUSK,PITX2,SIM1,SPP1
mut vs wt d702factor 2x q05		TRAF3	0.327	enzyme		-0.326		0.05	-0.473	0.00537	CCR1,CXCL10,CXCL13,CXCL2,CXCL3,IL1B,IL6,NDRG1,PLBD1,TNFAIP3	CHUK,CTNNB1,IKBKG,IL10,JUN,MYC,NFKB1,NFKBIA,NFkB (complex),RELA,SMAD3,STAT1,STAT3,TICAM1,TRAF3
mut vs wt d702factor 2x q05		phenylbutazone		chemical drug		-0.324		-0.15	0.211	1.14e-06	ABCC2,ADAMTS1,ANXA1,CP,EFEMP2,GPNMB,GPX2,LCN2,PLA1A,PRTFDC1,SLC34A2,SPP1,VIM	CHUK,NFKB1,NFKBIA,NFkB (complex),RELA,SMAD3,phenylbutazone
mut vs wt d702factor 2x q05		cholesterol		chemical - endogenous mammalian		-0.322		-0.065	-0.058	0.00283	ACTA2,APCS,APOB,CASP1,COL3A1,CXCL10,CXCL2,CXCL3,GLI3,IL1B,IL6,KLF11,LAPTM5,PCSK9,PLTP,RGCC,SAA1,SCD,SLC28A3,SMO	C3,CTNNB1,Creb,ITGB2,JUN,MYC,NFE2L2,NFKB1,NFKBIA,NFkB (complex),RELA,SMAD3,STAT1,STAT3,TNFRSF1A,cholesterol
mut vs wt d702factor 2x q05		AGER	-0.073	transmembrane receptor		-0.319		-0.07	-0.138	0.00103	CDKN1A,CHGA,CXCL2,CXCL3,IL1B,IL6,NEFL,S100A9,TNC,VEGFA	AGER,AHR,CEBPB,CTNNB1,Creb,IL22,JUN,MYC,NFKB1,NFKBIA,NFkB (complex),PPARG,PTGS2,RELA,SMAD3,SMAD4,SMAD7,STAT1,STAT3,TP53
mut vs wt d702factor 2x q05		miR-26a-5p (and other miRNAs w/seed UCAAGUA)		mature microrna		-0.318		0.196	-0.744	0.00706	CCND2,CDKN1A,CXCL3,FGF9,HPGD
mut vs wt d702factor 2x q05		LIF	-0.228	cytokine		-0.31		-0.052	-0.093	2.15e-05	ACTA2,BATF,CDKN1A,COCH,CRP,CXCL10,CXCL2,IL1B,IL6,KDR,LARGE1,MEF2C,NMI,POU5F1,RGS4,SFRP4,SOCS2,SPP1,TNC,VEGFA,WNT5A,WT1,ZFP42,ZFP57	CEBPB,CTNNB1,Creb,EGR1,EP300,FN1,JUN,LIF,MYC,NFKB1,NFkB (complex),NOTCH1,P38 MAPK,RELA,RUNX2,SMAD1,SMAD3,SP1,STAT1,STAT3,TP53,VEGFA,ZFP36
mut vs wt d702factor 2x q05		lomustine		chemical drug		-0.302		-0.166	0.248	8.67e-05	ABCC2,ANXA1,CP,EMP3,GPNMB,LCN2,PLA1A,PRTFDC1,SLC34A2,SPP1,VIM
mut vs wt d702factor 2x q05		DSCAM	0.411	other		-0.302		-0.1	0.03	0.00238	DAB1,ELMO1,KCND3,KCNJ2,MMP10,NEURL1B,NLGN2,PLCB1,ROBO2,SFRP4,VIM
mut vs wt d702factor 2x q05		MAP3K1	0.275	kinase		-0.289		-0.141	0.078	0.00774	COL3A1,CSTA,IVL,PLAUR,RGS4,TNC,TPH1	CEBPB,ESR2,FOS,GLI2,JUN,JUND,MAP2K1,MAP3K1,MAPK8,MYC,NFKB1,NFkB (complex),P38 MAPK,RELA,SMAD3,SP1,STAT3,TP53,ZFP36
mut vs wt d702factor 2x q05		ozone		chemical toxicant		-0.284		-0.181	0.184	0.000105	CCR3,CXCL10,CXCL2,CXCL3,IL1B,IL6,SPP1	C3,CXCL2,CXCL3,Ccl2,Creb,IKBKB,JUN,NFKB1,NFKBIA,NFkB (complex),RELA,STAT3,TP63,ozone
mut vs wt d702factor 2x q05		IL17C	-0.015	cytokine		-0.278		-0.196	0.108	0.0264	IL1B,IL6,LCN2,S100A9
mut vs wt d702factor 2x q05		K-252		chemical drug		-0.277		0.151	-0.612	0.00435	BDNF,MYCN,NDRG1,SPP1,VEGFA	AHR,Akt,CREB1,Creb,EGR1,ERK1/2,ESR1,FOS,FOSL1,FOXO1,JUN,JUND,K-252,Mapk,NFE2L2,NFKB1,NTRK2,Pkc(s),SMAD3,SP1,STAT3
mut vs wt d702factor 2x q05		UM101		chemical - kinase inhibitor		-0.277		0.196	-0.712	0.00706	CD200,CXCL10,IL1B,PLA1A,VDR	CEBPB,JUN,MAPK14,SP1,TP53,TP73,UM101
mut vs wt d702factor 2x q05		PI3K (family)		group		-0.275		-0.099	0.108	2.41e-05	ACTA2,AKR1B10,AKR1C1/AKR1C2,CD274,CXCL10,EGLN3,FBXO32,IL1B,IL6,KLF2,NQO1,SLC2A1,SNAI2,TNC,TNFSF10,VEGFA	AKT1,Akt,CEBPB,CTNNB1,Creb,EGR1,FOXO1,FOXO3,JUN,MYC,NFE2L2,NFKB1,NFKBIA,NFkB (complex),PI3K (family),RELA,SMAD3,SP1,STAT1,STAT3,TNF,TP53
mut vs wt d702factor 2x q05		TBK1	0.041	kinase		-0.275		-0.116	0.083	0.00779	CD70,CXCL10,CXCL2,CXCL3,IL6,NMI,PLA1A,RGCC,SH3BP5,VEGFA	AHR,IKBKB,IKBKG,Interferon alpha,NFE2L2,NFKB1,NFKBIA,NFkB (complex),RELA,SMAD3,SQSTM1,STAT1,STAT3,TBK1,TP63
mut vs wt d702factor 2x q05		diethylnitrosamine		chemical toxicant		-0.269		-0.019	-0.222	0.0202	ACTA2,APCS,CDKN1A,COL3A1,DCLK1,IL1RAP,IL6,LCN2,NQO1,VEGFA
mut vs wt d702factor 2x q05		SHC1	0.156	other		-0.26		0.018	-0.314	0.00208	CDH2,CDKN1A,CXCL13,FST,IL13RA2,KLF11,KLF2,NQO1,TFEC	CTNNB1,EGR1,FOXO1,FOXO3,HIF1A,JUN,KLF2,NFATC1,NFKB1,NFKBIA,NFkB (complex),PI3K (complex),PPARG,PPARGC1A,RELA,SHC1,SIRT1,SMAD2,STAT3
mut vs wt d702factor 2x q05		ERBB4	0.116	kinase		-0.258		-0.014	-0.22	0.0118	ACTA2,BDNF,CADM1,CDKN1A,COL3A1,GJA1,SLC2A1,TNC,WNT1
mut vs wt d702factor 2x q05		ionomycin		chemical reagent		-0.254		-0.145	0.327	0.00292	ANKH,B3GAT1,BDNF,CCND2,CD70,CXCL10,ENPP1,IL6,ITGB2,KCNJ2,LDHA,MMP10,SOCS2,SPP1,STC1,TNFSF10,XCL1	CEBPB,CTNNB1,Ca2+,Creb,FOXO1,IFNG,IL4,JUN,NFATC1,NFATC4,NFkB (complex),P38 MAPK,SP1,STAT1,STAT3,TP53,ZFP36,ionomycin
mut vs wt d702factor 2x q05		RNASEL	-0.015	enzyme		-0.254		0.009	-0.271	0.0458	CDKN1A,FREM2,IL1B,TIAM1
mut vs wt d702factor 2x q05		2-bromoethylamine		chemical reagent		-0.249		-0.172	0.364	8.94e-08	ABCC2,ADAMTS1,ANXA1,CP,EFEMP2,EMP3,GPNMB,GPX2,LCN2,PLA1A,SLC34A2,SPP1,VIM
mut vs wt d702factor 2x q05		JAK		group		-0.243		-0.138	0.093	0.000407	CDH2,CXCL10,FBXO32,IL6,NEUROG3,SOCS2,VIM,WNT1	AKT1,CEBPB,CTNNB1,FOXM1,FOXO1,FOXO3,JAK,JUN,MYC,Mek,NFKB1,NFkB (complex),PI3K (complex),SMAD3,SMAD4,SP1,STAT1,STAT3,TP53,Tgf beta
mut vs wt d702factor 2x q05		CCN5	-0.179	growth factor		-0.239		0.035	-0.33	0.00629	ACTA2,CD24,DSP,IGFBP7,ITGA5,SNAI2,VIM	AR,CCN5,SMAD2,SMAD3,SMAD4,SP1,STAT3
mut vs wt d702factor 2x q05		ZBTB20	-0.9	transcription regulator		-0.239		-0.008	-0.221	0.0227	CYP1A2,CYP2B6,GAS6,IL6,PDK4,SOCS2
mut vs wt d702factor 2x q05		TREM1	-0.886	transmembrane receptor		-0.237		-0.102	0.165	0.011	CCRL2,CD274,CXCL10,CXCL2,CXCL3,IL1B,IL6,KCNJ2,LY9,MMP10,MT1F,NT5E,SERPINB2,SLAMF7,SPP1,WNT5A
mut vs wt d702factor 2x q05		sertraline		chemical drug		-0.232		-0.131	0.025	0.00623	BDNF,IL6,PDE4B,TPH1
mut vs wt d702factor 2x q05		HDAC1	-0.029	transcription regulator		-0.232		0.024	-0.3	0.0094	AR,BDNF,CCND2,CDKN1A,COL2A1,FGFBP1,IL1B,IL6,KDR,LCN2,MEF2C,POU5F1,RRM2B,S100A9,SERPINB2,SNAI2,SPP1,SYT4,TBX1,TNS1,VDR	CREBBP,CTNNB1,EGR1,EP300,FOXM1,HDAC1,Histone h3,JUN,KMT2A,MED1,MYC,NFKB1,NFKBIA,NFkB (complex),PPARG,RELA,RNA polymerase II,SMAD3,SMAD4,SP1,STAT3,TCF,TP53
mut vs wt d702factor 2x q05		chenodeoxycholic acid		chemical - endogenous mammalian		-0.23		-0.055	-0.062	0.00422	ABCC2,APOB,HPGD,IL6,LRP2,PDK4,PLTP,SLC51B,SULT1E1,VDR	AHR,Creb,ESR1,FOXA2,JUN,JUND,NR1I2,Pkc(s),chenodeoxycholic acid
mut vs wt d702factor 2x q05		PTGER4	-0.059	g-protein coupled receptor		-0.229		0.047	-0.382	0.031	ACTA2,CH25H,CP,CXCL10,CYRIA,GBP6,IL13RA2,IL1B,IL6,SLC13A3,SPP1,TNFSF10
mut vs wt d702factor 2x q05		SOX9	-0.461	transcription regulator		-0.228		-0.105	0.154	1.03e-06	AR,CDH2,CDKN1A,CEACAM5,COL2A1,DMBT1,GAS7,H19,HAPLN1,NR5A1,SCGB1A1,SNAI2,SOX5,VEGFA	AR,BRCA1,CREBBP,CTNNB1,Ca2+,Creb,EP300,ESR2,FOXM1,FOXO1,JUN,KLF4,NFkB (complex),PPARG,PTHLH,SMAD3,SMAD4,SOX9,SP1,STAT3,TCF,TP53
mut vs wt d702factor 2x q05		pubchem compound 11368987		chemical reagent		-0.228		0.157	-0.526	0.000561	CXCL10,CXCL2,IL1B,IL6	AHR,BCL3,CEBPB,CSF2,IFNG,IL10,IL17A,IL1B,JUN,NFKB1,NFKBIA,NFkB (complex),RELA,SMAD3,SP1,STAT1,STAT3,TP53,pubchem compound 11368987
mut vs wt d702factor 2x q05		IGFBP2	-0.842	other		-0.224		-0.149	0.135	0.0247	CADM1,CD24,COL14A1,IGFBP3,ITGA5,NMU
mut vs wt d702factor 2x q05		ESRRG	-0.157	ligand-dependent nuclear receptor		-0.222		-0.061	-0.062	0.0335	ALDOC,ATP4B,CDKN1A,FBXO32,LDHA,PDK4,VEGFA
mut vs wt d702factor 2x q05		TANK	-0.098	other		-0.221		0.023	-0.271	0.0196	CXCL2,CXCL3,IL6,PLA1A,RGCC
mut vs wt d702factor 2x q05		BTK	0.136	kinase		-0.22		-0.026	-0.141	0.0266	CCND2,CD274,CDKN1A,CXCL10,CXCL3,IFITM1,IL1B,IL6,MX2,SLC2A3
mut vs wt d702factor 2x q05		MEF2C	-1.584	transcription regulator		-0.218		-0.142	0.356	2.27e-09	BDNF,CDKN1A,CKB,COL2A1,COL3A1,CXCL2,CXCL6,CXCR6,FRZB,GJA1,GJA5,IL6,ITGB1BP2,KCNJ2,KLF2,MEF2C,MMP10,MYOM2,NPPB,PTH1R,PTPRB,SYK,TNNT2,VIM	FOXO1,GATA2,GATA3,GATA4,HDAC1,HIF1A,JUN,MEF2C,NFKBIA,NFkB (complex),NKX2-5,PPARGC1A,RNA polymerase II,RUNX3,SIRT1,SMAD4,STAT3,STAT4,TBX5
mut vs wt d702factor 2x q05		naringenin		chemical - endogenous non-mammalian		-0.218		0.045	-0.307	0.00333	ACTA2,BDNF,COL3A1,CXCL10,CYP1A1,GJA1	Akt,EGFR,EGR1,ESR1,ESR2,FOS,FOSL1,FOXO1,HIF1A,JUN,Mapk,NFE2L2,NFKB1,NFkB (complex),RARA,RELA,SMAD3,SP1,SREBF1,STAT3,TP53,cholesterol,estrogen receptor,naringenin
mut vs wt d702factor 2x q05		PRKCA	0.605	kinase		-0.217		-0.1	0.069	0.00634	ARHGDIB,BCL11A,CDKN1A,CSTA,CXCL10,CXCL2,CXCL3,IGFBP3,IVL,NQO1,S100A9,VEGFA	CEBPB,FOS,HIF1A,Hdac,IL17A,JUN,JUND,MYC,NFKB1,NFKBIA,NFkB (complex),PRKCA,RAF1,RELA,SMAD3,SP1,STAT3,TP53,TP63,TP73
mut vs wt d702factor 2x q05		LGALS1	-0.427	other		-0.214		-0.113	0.111	0.00343	ACTA2,CCND2,CDKN1A,CXCL2,IL1B,IL6,MMP10,PTX3,TOX	AHR,Akt,CEBPB,Creb,EGR1,FOXO1,IFNG,JUN,LGALS1,NFKB1,NFKBIA,NFkB (complex),PIK3R1,RELA,SMAD3,SP1,STAT1,STAT3,TP53
mut vs wt d702factor 2x q05		KLF5	-0.606	transcription regulator		-0.214		-0.113	0.053	0.0392	ACTA2,CDKN1A,CGREF1,FGFBP1,S100A9,SORCS2
mut vs wt d702factor 2x q05		RETNLB	-0.52	other		-0.213		-0.181	0.327	0.00693	ACTA2,CCN4,CCR1,FRZB,IL1B,IL6,PLA1A,SOCS2,WNT5A	CCL5,CEBPB,CREB1,CTNNB1,FOXO1,FOXO3,IL6,JUN,NFKB1,NFKBIA,NFkB (complex),P38 MAPK,PI3K (complex),RELA,RETNLB,STAT1,STAT3,TNF,ZFP36
mut vs wt d702factor 2x q05		MITF	-0.048	transcription regulator		-0.209		-0.166	0.463	0.015	ACP5,CDKN1A,CENPF,COL2A1,FBXO32,FMOD,FRMD4B,GMPR,GPNMB,GREB1,HAPLN1,HPGD,ITGA4,KIFC1,PLA1A,POU5F1,SOX5,TFAP2A,TPH1
mut vs wt d702factor 2x q05		PSMB8	0.238	peptidase		-0.208		-0.117	0.044	0.000562	GJA1,IL6,KCNJ2,MAGEA3/MAGEA6,TNFAIP3	CEBPB,NFKB1,NFKBIA,NFkB (complex),PSMB8,RELA,STAT3
mut vs wt d702factor 2x q05		IKBKG	0.035	kinase		-0.207		-0.14	0.383	4.05e-07	CCR1,CH25H,CLDN8,CP,CTSF,CXCL10,CXCL2,CXCL3,CXCL6,DCN,FOXF2,IGFBP6,IL1B,IL6,KCND2,LCN2,PTX3,SERPINB2,TNFAIP3,TNFSF10,VEGFA	CEBPB,CHUK,IKBKB,IKBKG,JUN,MAP3K7,NFE2L2,NFKB1,NFKBIA,NFkB (complex),RELA,SMAD3,STAT3,TNF,TP53,TP63
mut vs wt d702factor 2x q05		SREBF1	-0.226	transcription regulator		-0.206		-0.139	0.345	0.00316	ACSL5,ADH1C,ALDOC,APOA2,AR,CDKN1A,CXCL10,FBXO32,GPNMB,IL1B,IL6,MEF2C,PCSK9,PDK1,PLTP,SCD,SLC22A4,SLC2A2,SORBS3,TF,VEGFA	Akt,CTNNB1,D-glucose,EGR1,FOXO1,FOXO3,HIF1A,JUN,MYC,NFE2L2,NFKB1,NFkB (complex),NR5A2,PDX1,PI3K (complex),PPARG,RELA,RXRA,SMAD3,SP1,SREBF1,STAT3,cholesterol
mut vs wt d702factor 2x q05		MYB	-0.408	transcription regulator		-0.205		-0.076	0.084	0.00174	CDH2,CNN3,CXCL2,CXCL6,IGFBP3,IL6,KDR,LANCL3,LCN2,MFAP3L,NMU,RGCC,SNAI2,SOCS2,SPP1,TFEC,VIM	Akt,EGR1,ERK,FOXO1,Histone h3,KMT2A,MED1,MYB,NFKB1,NFKBIA,NFkB (complex),PPARG,RELA,RNA polymerase II,SMAD3,SP1,STAT3,TP53
mut vs wt d702factor 2x q05		ALDH1A2	0.086	enzyme		-0.2		0.061	-0.335	0.0108	ABCG2,ALDH1A3,BGN,COL3A1,SPP1
mut vs wt d702factor 2x q05		CG		complex		-0.198		-0.128	0.579	8.06e-11	ACTA2,ADAMTS1,AKR1B10,AKR1C3,APCDD1,APLN,AR,BDNF,CCND2,CDH2,CDKN1A,CTSV,CXCL10,CXCL3,FAM3D,FGF9,FST,GBP6,GJA1,GREM2,HAPLN1,HPGD,IGFBP3,IL13RA2,IL1B,IL6,INHA,INHBB,ITGA4,KCNT2,KISS1R,NPR1,NPR3,PAPPA,PLAUR,PTX3,RGS4,SFRP4,SLC4A4,SNAP25,SPP1,SRXN1,STC1,TENM4,TM4SF1,VEGFA	CEBPB,CG,CREB1,CTNNB1,Creb,EGR1,EP300,ERK1/2,ESR1,ESR2,FOS,FSH,HDAC1,JUN,NFKB1,NFkB (complex),P38 MAPK,SMAD3,SP1,STAT3,TP53,ZFP36,beta-estradiol
mut vs wt d702factor 2x q05		WNT5A	1.048	cytokine		-0.198		-0.014	-0.142	4.28e-05	ARHGDIB,COL2A1,CRYAB,CXCL2,CXCL6,IL1B,IL6,INHBB,ITGB7,MMP10,NR5A1,SPP1,STC1,TNFRSF11A,TNFSF10,VEGFA,VIM	AHR,CEBPB,CTNNB1,FOXM1,IL1B,IL6,JUN,NFKB1,NFKBIA,NFkB (complex),PPARG,RELA,SMAD4,STAT3,TCF,TNF,WNT5A
mut vs wt d702factor 2x q05		CTCF	-0.187	transcription regulator		-0.198		-0.054	-0.037	0.0122	AVPR1A,BDNF,CDKN1A,CDKN1C,H19,ITGA8,LEFTY1,MYCN,PCDHB11,PCDHB12,PCDHGA10,XIST
mut vs wt d702factor 2x q05		reserpine		chemical drug		-0.196		-0.171	0.144	0.00396	ADRA2A,CHGA,CNR1,IL1B
mut vs wt d702factor 2x q05		CASP1	-1.145	peptidase		-0.194		-0.104	0.05	0.000708	ACTA2,CXCL2,IL1B,IL6,KDR,SCD,VIM	CASP1,CREB1,CTNNB1,FGF2,GLI1,JUN,JUNB,JUND,LEP,LGALS1,MYC,NFKB1,NFKBIA,NFkB (complex),PPARG,RELA,SMAD3,SP1,STAT1,STAT3
mut vs wt d702factor 2x q05		RASSF1	-0.136	other		-0.194		-0.032	-0.094	0.00537	CCND2,CDH2,CDKN1A,CRABP2,FRMD4B,IGFBP3,PIWIL1,SPP1,TUBB1,TUBB2B	CTNNB1,Creb,EGR1,ERK1/2,FOS,FOXM1,HRAS,JUN,JUND,MAPK1,MYC,NFKB1,NFkB (complex),POU5F1,PPARG,RARA,RASSF1,SMAD4,SP1,STAT3,TCF,TP53
mut vs wt d702factor 2x q05		RXRB	0.013	ligand-dependent nuclear receptor		-0.191		0.033	-0.254	0.000923	CRYAB,CXCL10,FSTL1,GAS6,IGFBP6,IL1B,LCN2,POU5F1,SLC6A8,SPP1	CEBPB,CTNNB1,FOS,IgG,JUN,JUND,MYC,NFKBIA,NFkB (complex),POU5F1,RARB,RXRA,RXRB,STAT1,STAT3,tretinoin
mut vs wt d702factor 2x q05		vismodegib		chemical drug		-0.186		0.084	-0.388	0.00121	CDA,IL1B,IL6,POU5F1,TNFSF10,VEGFA	HIF1A,NFkB (complex),RELA,TP73,gemcitabine,vismodegib
mut vs wt d702factor 2x q05		MAP3K8	0.058	kinase		-0.185		-0.028	-0.094	0.0148	CACNB3,CCR1,CD70,CXCL2,CXCL3,GPR171,IL1B,IL6,SDR42E1,SH3D21,SIX1,SLA,TUBB2B
mut vs wt d702factor 2x q05		picryl chloride		chemical toxicant		-0.18		-0.196	0.207	0.00233	CXCL10,CXCL3,IL1B,SPP1
mut vs wt d702factor 2x q05		BMP2	0.17	growth factor		-0.18		-0.109	0.198	0.0359	ACP5,ACTA2,CDKN1A,CHRNA2,COL2A1,CPA1,FST,MEF2C,PITX2,POU5F1,PTH1R,SOSTDC1,SPP1,VDR,VEGFA
mut vs wt d702factor 2x q05		TO-901317		chemical reagent		-0.18		-0.059	0.036	0.0492	ACSL5,ADH1C,ANGPTL3,APCS,APOD,CASP1,CH25H,CRP,IL1B,IL6,LIPG,PCSK9,PLTP,SCD,SLC2A2,VEGFA
mut vs wt d702factor 2x q05		PPARG	-0.436	ligand-dependent nuclear receptor		-0.173		-0.058	0.15	2.04e-05	ABCG2,ACSL5,ACTA2,ALOX15B,APOA2,CD274,CDKN1A,CEACAM5,CORIN,CPLX2,CRABP2,CXCL2,CXCL3,CXCL6,CYP4B1,EGLN3,ENO2,ERO1A,FST,IGFBP3,IGFBP6,IGFBP7,IL1B,IL6,KLF11,MUC13,NDRG1,NPPB,PDE3B,PDK4,PRDM1,SAA1,SCD,SLC2A1,SLC2A2,SMO,SPP1,TLCD3B,TNFSF10,VDR,VEGFA,VIM	AHR,EGR1,IL1B,JUN,NCOA2,NFKB1,NFKBIA,NFkB (complex),PPARG,RARA,RARB,RELA,RXRA,SMAD3,SP1,STAT1,STAT3,THRB,troglitazone
mut vs wt d702factor 2x q05		BCR-ABL1		fusion gene/product		-0.171		-0.102	0.111	0.0403	IL1RAP,LCN2,LDHA,SLC2A1,SLC2A3,SNAI2,SOCS2,TNFSF10
mut vs wt d702factor 2x q05		retinoid		chemical drug		-0.169		-0.059	-0.06	0.0352	CDKN1A,GJA1,IGFBP3,TNFSF10,VEGFA
mut vs wt d702factor 2x q05		isoproterenol		chemical drug		-0.168		-0.127	0.26	0.0226	ACTA2,APLN,CYP1A1,CYP1B1,DIO2,IL1B,IL6,NPPB,PDE3A,RGS5,RLN3,SCD,VEGFA
mut vs wt d702factor 2x q05		EOMES	0.33	transcription regulator		-0.162		0.004	-0.18	1.65e-10	ACTA2,ANXA1,CER1,COL3A1,FOXC1,FREM1,FRZB,GRP,H19,IGFBP3,KDR,MXRA5,NEFL,NHLH2,PCDH19,PDPN,PITX1,POU5F1,PRDM1,ROBO2,SV2B,TNFSF10,TSHZ1
mut vs wt d702factor 2x q05		brefeldin A		chemical - endogenous non-mammalian		-0.157		0.012	-0.186	0.00629	ABCA12,ADRA1B,CXCL3,GJA1,KCND2,KCND3,OPRK1	F2R,JUN,NFKB1,NFkB (complex),SP1,STAT3,brefeldin A
mut vs wt d702factor 2x q05		BMP6	0.57	growth factor		-0.152		-0.091	0.102	0.000939	ACTA2,ADAMTS1,ADAMTS5,CDKN1A,CYP1B1,FRMD4B,IL6,ITGA5,MYCN,PITX2,SEMA3A,VEGFA	BMP6,CEBPB,CTNNB1,Creb,EGR1,EP300,ERK1/2,FOS,IL6,JUN,NFKB1,NFKBIA,NFkB (complex),NOTCH1,RELA,RUNX2,SMAD1,SMAD2,SMAD3,SMAD4,SP1,STAT3,TP53
mut vs wt d702factor 2x q05		TBXT		transcription regulator		-0.152		-0.196	0.236	0.000984	COL2A1,FMOD,HAPLN1,KDR,SOX5
mut vs wt d702factor 2x q05		Nkx2-2os		other		-0.152		-0.17	0.184	0.00308	NEUROG3,NNAT,PCSK1N,SLC2A2
mut vs wt d702factor 2x q05		picropodophyllin		chemical drug		-0.152		0.17	-0.489	0.00396	CCND2,PIWIL1,POU5F1,PRDM1
mut vs wt d702factor 2x q05		AXIN1	-0.081	other		-0.152		0.093	-0.336	0.011	APCDD1,CCND2,LEF1,PITX2
mut vs wt d702factor 2x q05		SUMO2	-0.198	enzyme		-0.152		0.048	-0.247	0.0322	CCND2,IL6,MOXD1,SLC51B,TNC
mut vs wt d702factor 2x q05		PRKCE	0.482	kinase		-0.15		-0.164	0.258	0.0485	ACTA2,CDKN1A,CRP,IL1B,IL6,IVL,VEGFA
mut vs wt d702factor 2x q05		LTA	3.052	cytokine		-0.149		-0.129	0.158	0.000119	APCS,CHST4,COL2A1,CRP,CXCL13,IL1B,IL6,ITGA5,PDPN	CEBPA,CEBPB,FOS,IL1,IL6,JUN,LTA,NFKB1,NFKBIA,NFkB (complex),PPARG,RELA,STAT3,TNF
mut vs wt d702factor 2x q05		thioacetamide		chemical toxicant		-0.148		-0.168	0.57	1.65e-13	ABCC2,ACP5,ACTA2,ADAMTS1,AKR1C3,ANXA1,BGN,CD200,CHRNA2,CKB,COL3A1,CP,CTSF,CYGB,CYP1A1,CYP1A2,DAB1,EMP3,FSTL1,FXYD6,GPNMB,GPX2,H3C4,IFITM2,IGFBP3,IL13RA2,IL1B,IL6,KDR,LCN2,LOX,NLGN1,PLA1A,RGCC,SERPINA7,SLC13A3,SLC34A2,SPP1,ST3GAL2,TMEM45A,WNT5A	CEBPB,ERK,HIF1A,JUN,NFKBIA,NFkB (complex),PPARG,RELA,SMAD3,SMAD4,STAT3,TGFB1,TNF,TP53,thioacetamide
mut vs wt d702factor 2x q05		DICER1	-0.26	enzyme		-0.146		-0.003	-0.134	0.00482	ACVR1C,APOD,BDNF,CCND2,CDKN1A,CXCL10,GNG2,H19,IGDCC3,IL1B,ITGA4,ITGA5,KDR,LIPG,PITX2,RGCC,RGS5,SERPINB2,SFRP4,SLC4A4,TM4SF1,VIM,WNT5A	AR,CEBPB,CTNNB1,DICER1,ERBB2,ESR2,FOS,HDAC1,JUN,JUND,MET,MYC,NFKB1,NFKBIA,NFkB (complex),SMAD3,SP1,STAT3,TP53,let-7
mut vs wt d702factor 2x q05		hydrocortisone		chemical - endogenous mammalian		-0.141		-0.035	-0.007	0.00157	BDKRB2,CCND2,CDH2,FGF9,IGFBP3,IGFBP6,IGFBP7,IL1B,IL6,IVL,SMO,STC2,TAT,TNFAIP3,VIM	AGT,AHR,CEBPA,CEBPB,CTNNB1,FOS,HIF1A,IGF1,JUN,JUND,MYC,NFKB1,NFKBIA,NFkB (complex),PPARG,SMAD3,SP1,STAT3,TP53,dexamethasone,hydrocortisone
mut vs wt d702factor 2x q05		Tgf beta		group		-0.14		-0.086	0.306	1.94e-06	ACTA2,ADH1C,ANKH,BGN,CASP1,CCND2,CDH2,CDKN1A,CHST11,COL5A1,CXCL10,CXCL2,CXCL3,DCN,FST,FSTL1,IGFBP3,IL1B,IL6,INPP5D,ITGA5,LARP6,LOX,MMP10,MYCN,PFKFB4,SNAI2,SPP1,TNFRSF11A,TNFSF10,VEGFA,VIM	AHR,CEBPB,FN1,HIF1A,IFNG,JUN,NFKBIA,NFkB (complex),RELA,SMAD3,SMAD4,SMAD7,SP1,STAT1,STAT3,TGFB1,TNF,TP53,Tgf beta
mut vs wt d702factor 2x q05		PKP2	-0.967	other		-0.132		0.098	-0.327	0.0002	COL2A1,COL3A1,DSP,GJA1	HIF1A,PKP2,SMAD3,SMAD4,STAT3,TGFB1,TP53
mut vs wt d702factor 2x q05		CIP2A	-0.83	other		-0.13		0.073	-0.381	2.32e-05	COL8A1,CRYAB,DCN,DSC2,GPNMB,LRP4,PDK1,PDK4,PLAUR,PTPRB,SLC16A3,SLC22A4
mut vs wt d702factor 2x q05		NT5E	1.177	phosphatase		-0.13		0.122	-0.401	0.000984	COL3A1,IL13RA2,IL1B,IL6,SPP1	EGFR,HIF1A,JUN,NFKB1,NFKBIA,NFkB (complex),NT5E,RELA,SP1,STAT3,TP53
mut vs wt d702factor 2x q05		FHL2	0.968	transcription regulator		-0.129		-0.035	-0.047	0.0227	ACTA2,CLDN5,CXCL10,INHA,SPP1,WNT5A
mut vs wt d702factor 2x q05		S-nitrosoglutathione		chemical toxicant		-0.128		0.035	-0.214	0.00836	CDKN1A,CNR1,CXCL10,GJA1,NQO1,OPRK1	CTNNB1,Creb,EGR1,ERK1/2,FOS,FOXO1,FOXO3,GJA1,HRAS,JUN,JUND,MYC,NFKB1,NFkB (complex),PI3K (complex),S-nitrosoglutathione,SP1,STAT3,TP53
mut vs wt d702factor 2x q05		CCR5	1.076	g-protein coupled receptor		-0.119		-0.072	0.023	0.0322	CXCL10,CXCL2,CXCL3,IL1B,IL6
mut vs wt d702factor 2x q05		SFN	-0.429	other		-0.115		-0.123	0.183	0.000995	CDH2,DSC2,DSP,PDK4,SNAI2,VIM	Akt,CTNNB1,EGR1,ESR1,ESR2,FOS,FOXO1,JUN,MED1,NFKB1,NRIP1,SFN,SMAD3,SP1,STAT3,TP53,beta-estradiol,estrogen receptor
mut vs wt d702factor 2x q05		pravastatin		chemical drug		-0.114		0.022	-0.171	0.00342	APOB,CRP,CYP2B6,GJA1,IL1B,IL6,PCSK9,VEGFA	AHR,CTNNB1,F2,F7,JUN,LDLR,NFKB1,NFKBIA,NFkB (complex),RAC1,RELA,SMAD3,SP1,SREBF1,STAT3,pravastatin
mut vs wt d702factor 2x q05		JUNB	-0.11	transcription regulator		-0.113		-0.142	0.306	0.000854	AGTR1,BDNF,CD274,CXCL2,CXCL3,CYP1B1,HPGD,IL1B,IL6,LCN2,MMP10,PLAUR,SCD,SERPINB2,SNAI2,UGT1A3	CEBPB,FN1,FOS,JUN,JUNB,JUND,MYC,NFKB1,NFKBIA,NFkB (complex),PPARG,RELA,SMAD3,SP1,STAT3,TNF,TP53
mut vs wt d702factor 2x q05		LEF1	1.535	transcription regulator		-0.112		-0.131	0.38	0.000399	ABCG2,ACTA2,AR,CD200,CD274,CDKN1A,CHCHD10,ENO2,HES7,INPP5F,LEF1,MAPK12,NCOA7,PRDM1,SPP1,TIAM1,VIM	AR,CTNNB1,ESR1,FOXM1,HDAC1,HIF1A,Hdac,Histone h4,JAG1,JUN,LEF1,MED1,MYC,MYOCD,NOTCH1,NOTCH3,RELA,RUNX2,SMAD3,SMAD4,SP1,STAT3,TCF,TP53
mut vs wt d702factor 2x q05		FGFR2	-0.582	kinase		-0.111		-0.051	0.057	0.000515	CCN4,CCND2,CDKN1A,COL3A1,FST,GJA1,IL1B,INHBB,MAGEA3/MAGEA6,NNAT,PITX2,PLAUR,PTH1R,SPP1,TFEC	CTNNB1,Creb,EGFR,EGR1,ERK1/2,FGFR2,FOS,FOSL1,HIF1A,Histone h3,JUN,KMT2A,MED1,MYC,Mapk,NFE2L2,NFKB1,NFkB (complex),RELA,RNA polymerase II,SP1,STAT1,STAT3
mut vs wt d702factor 2x q05		PTK2	0.073	kinase		-0.11		-0.078	0.078	0.000829	ACTA2,CDKN1A,CXCR6,DSP,IL6,ITGA5,P4HA1,SPP1,TNC	AHR,AKT1,CEBPB,FN1,FOXO3,GLI2,HDAC1,JUN,MAP2K1,MYC,NFKB1,NFkB (complex),PTK2,RELA,SMAD3,SMAD4,SMAD7,SP1,STAT3,TP53
mut vs wt d702factor 2x q05		RORA	0.112	ligand-dependent nuclear receptor		-0.108		-0.102	0.08	0.00403	CH25H,CXCL10,CYP2A6 (includes others),CYP2B6,HPGD,IL1B,IL6,LCN2,NAT2,NLGN1,NNMT,S100A9,SCD,SLC2A3,SLC30A10,SULF2,SULT1E1	AHR,CEBPB,CXCL3,Creb,IL1B,IL4,IL6,JUN,NFKB1,NFKBIA,NFkB (complex),RELA,RORA,SMAD3,SP1,STAT3,TP53
mut vs wt d702factor 2x q05		BRCA1	-0.615	transcription regulator		-0.107		-0.06	0.12	0.00451	AK1,ALDH1A3,AR,CDKN1A,CTSF,CYP1A1,CYP1B1,FXYD3,IFITM1,NQO1,PLTP,RRM2B,SNAI2,STC1,VEGFA,VIM	AR,BRCA1,CTNNB1,ESR1,ESR2,HDAC1,JUN,MYC,PGR,RARA,RELA,RNA polymerase II,RUNX2,SMAD3,SNAI2,SP1,STAT3,TERT,TP53,estrogen receptor
mut vs wt d702factor 2x q05		MYOD1		transcription regulator		-0.104		-0.111	0.33	0.00105	ACSL5,ACTA2,ASB2,CDKN1A,CDKN1C,CDO1,CENPF,CRYAB,DYSF,FSTL1,GREM2,LDB3,MEF2C,MUSK,MX2,PNMT,PRDM16,SIX1,SLC2A1,TNNT2,TNNT3,TNS1	Akt,EGR1,ESR1,FOXO1,MYOD1,NCOA2,NFKB1,PPARG,RARA,RARB,RNA polymerase II,RXRA,SMAD3,SMARCA4,SP1,STAT1,STAT3,THRB,TP53
mut vs wt d702factor 2x q05		STAT5A	-0.438	transcription regulator		-0.1		-0.04	0.031	2.68e-06	AKR1C3,AR,BCL11A,CCND2,CD24,CD70,CDKN1A,CYP1B1,EGLN3,FGFBP1,GCNT3,H2AC18/H2AC19,IFITM2,IGFL2-AS1,IL6,LCN2,LEF1,MUC13,ONECUT1,PCP4,PRDM1,PROM2,PTK6,RIMKLA,SLC2A1,SLC2A3,SLC34A2,SOCS2,TBX1,TM4SF1,TNFRSF11A	AKT1,CEBPB,CTNNB1,FOXO1,FOXO3,JUN,NFKB1,NFKBIA,NFkB (complex),PI3K (complex),SMAD3,SP1,STAT1,STAT3,STAT5A,STAT5B,TNF,TP53
mut vs wt d702factor 2x q05		RXRA	-0.102	ligand-dependent nuclear receptor		-0.093		-0.039	0.072	7.81e-09	ABCC2,ABCG2,ACSL5,ADH1C,AKR1C1/AKR1C2,ANGPTL3,APOA2,CDKN1A,CDO1,CEACAM5,CLMN,CRABP2,CRYAB,CXCL10,CYP1A2,CYP2B6,FSTL1,GAS6,IGFBP6,IL1B,IL6,LCN2,MYCN,NPPB,NRGN,ONECUT1,PLTP,PNMT,POU5F1,SCD,SLC2A2,SLC51B,SLC6A8,SPP1,TFAP2A,VDR,VEGFA	CTNNB1,EP300,FOXO1,JUN,L-triiodothyronine,MYC,NCOA2,NFkB (complex),NR1H3,NR5A2,NRIP1,PPARG,PPARGC1A,RARA,RELA,RNA polymerase II,RXRA,SP1,STAT1,STAT3,THRB,alitretinoin
mut vs wt d702factor 2x q05		KIN001-043		chemical - kinase inhibitor		-0.092		-0.044	0.004	0.00333	COL2A1,CRABP2,LEF1,LEFTY1,POU5F1,ZFP42	Akt,CTNNB1,EGR1,FOXM1,FOXO1,JUN,KIN001-043,NFKB1,SMAD3,SMAD4,SP1,STAT3,TCF
mut vs wt d702factor 2x q05		17-alpha-ethinylestradiol		chemical drug		-0.09		-0.064	0.148	0.000982	ABCC2,APOB,CCR1,CCR3,CDKN1A,CFP,CKB,CXCL10,CXCL3,CXCL6,CYP2B6,DSC2,INHBB,LCN2,SLC34A2,VEGFA	17-alpha-ethinylestradiol,CEBPB,CTNNB1,ESR1,ESR2,IFNG,IL6,JUN,MYC,NFKBIA,NFkB (complex),RELA,STAT1,STAT3,TNF,beta-estradiol,lipopolysaccharide
mut vs wt d702factor 2x q05		USF1	-0.028	transcription regulator		-0.09		-0.147	0.262	0.0075	ACP5,APLN,APOA2,FBXO32,IGFBP3,NR5A1,P4HA1,SPP1,TNFAIP3
mut vs wt d702factor 2x q05		CGAS	-1.616	enzyme		-0.087		-0.196	0.304	0.0203	CDKN1A,CXCL10,IL1B,IL6
mut vs wt d702factor 2x q05		WT1	-1.921	transcription regulator		-0.084		-0.027	0.012	0.00117	CDKN1A,CTSV,CXCL10,ENO2,IL1B,IL1RAP,INHA,MYCN,NDRG1,NR5A1,PLAUR,SH3BP5,SLC2A3,SNAI2,SRY,TFAP2A,TM4SF1,TSPAN5,VDR,VEGFA,WT1	CTNNB1,HIF1A,IGF1,JUN,MYC,NFkB (complex),SMAD3,SP1,STAT1,STAT3,WT1
mut vs wt d702factor 2x q05		bexarotene		chemical drug		-0.084		-0.084	0.257	0.00403	ADIRF,AKR1C1/AKR1C2,AKR1C3,APOA2,CYP1A2,GRP,IGFBP6,IL1B,LOXL2,LRP4,PCSK9,PLAUR,PLOD2,RORB,S100A9,SCD,TM4SF1	CEBPB,ESR2,FOS,JUN,JUND,NCOA2,NFKBIA,NFkB (complex),PPARG,RARA,RARB,RXRA,STAT3,THRB,TNF,bexarotene
mut vs wt d702factor 2x q05		CBX5	-0.278	transcription regulator		-0.081		0.196	-0.862	1.07e-05	AKR1C3,BCL11A,CD24,CDKN1A,CYP1B1,FGFBP1,GCNT3,H2AC18/H2AC19,IGFL2-AS1,LCN2,LEF1,MUC13,PCP4,PROM2,PTK6,SLC2A3,TM4SF1
mut vs wt d702factor 2x q05		RELA	-0.039	transcription regulator		-0.08		-0.135	0.673	0.000143	ABCG2,ACTA2,ADAMTS5,AHRR,AR,ARHGDIB,CD274,CDKN1A,COL2A1,CRP,CRYAB,CXCL10,CXCL2,CXCL3,CXCL6,CYP1A1,CYP2B6,DIO2,ELMO1,GSTA2,IL1B,IL6,KCNT2,LEF1,NMI,NPPB,PDE4B,POU5F1,PRDM1,PTX3,SAA1,SAA2,TACR1,TNFAIP3,UGT1A1,VEGFA,VIM,WT1	AHR,ARNT,CEBPB,CTNNB1,HIF1A,IL1B,IL6,JUN,NFKB1,NFKBIA,NFkB (complex),PPARG,RELA,SP1,STAT1,STAT3,TP53
mut vs wt d702factor 2x q05		tranylcypromine		chemical drug		-0.075		-0.073	0.101	3.28e-05	BDNF,CD274,CDKN1A,CXCL10,PDE4B,TSPOAP1
mut vs wt d702factor 2x q05		SGK1	-0.178	kinase		-0.075		-0.14	0.335	0.00187	CDKN1A,IL6,KCNQ2,SLC1A6,SLC2A3,SLC34A2,SLC6A8,SMO,TRPV6	Gm21596/Hmgb1,NFATC2,NFE2L2,PARP1,SGK1,STAT3,TP53
mut vs wt d702factor 2x q05		FOXL2	-0.286	transcription regulator		-0.072		-0.109	0.25	0.00168	CH25H,CXCL2,CXCL3,FST,GPRC5B,NR5A1,RSPO3,SERPINB2,TNFAIP3	AHR,CREB1,CTNNB1,FOXL2,FSH,JUN,NFkB (complex),SMAD3,SMAD4,SMAD7,STAT3
mut vs wt d702factor 2x q05		plerixafor		chemical drug		-0.068		0.114	-0.293	0.0373	CDA,CDKN1C,IL6,POU5F1
mut vs wt d702factor 2x q05		HOXA13	-0.768	transcription regulator		-0.064		-0.125	0.183	0.00301	AR,GJA1,GLI3,IL6,WNT5A
mut vs wt d702factor 2x q05		atorvastatin		chemical drug		-0.063		0.032	-0.177	0.0346	ABCC2,APOB,BDNF,CRP,CYP2B6,DMC1,GJA1,GJC1,IL6,ITGB2,LIPG,PCSK9,SPP1,TNFRSF11A,VEGFA
mut vs wt d702factor 2x q05		Trp53cor1		other		-0.056		-0.136	0.271	0.000654	CDKN1A,FOXE1,IL1B,IL6,NTN1,SSTR2	CREBBP,CTNNB1,EP300,Histone h3,KLF4,KMT2A,MED1,RELA,RNA polymerase II,SP1,TP53,Trp53cor1,VCAN
mut vs wt d702factor 2x q05		DNMT3A	-0.784	enzyme		-0.046		0.047	-0.199	0.0143	APLN,CNR1,CPLX2,ENPP6,ERO1A,FOXF2,LRP2,NQO1,POU5F1,SALL3,SLIT2,SPP1,TNNT2,WNT1
mut vs wt d702factor 2x q05		PYCARD	-0.219	transcription regulator		-0.043		-0.094	0.161	0.00435	ACTA2,CCND2,CDKN1A,IL1B,IL6	AHR,AR,CASP1,Gm21596/Hmgb1,JUN,JUNB,LEP,NFKB1,NFKBIA,NFkB (complex),PPARG,PYCARD,RELA,SMAD2,SMAD3,SMAD4,SMAD7,SP1,STAT3,TP53
mut vs wt d702factor 2x q05		PRKAA1	-0.233	kinase		-0.039		0.082	-0.339	0.00191	ACTA2,ARHGDIB,CD24,CDKN1A,CENPF,CYP2B6,EGLN3,IL6,KCNQ2,KLHL29,LDHA,MAGEA4,PTPRR,SYT4,TNS1	AHR,CTNNB1,Collagen type I (complex),FOXO3,HIF1A,ITGB1,JUN,MYC,NFKB1,NFKBIA,NFkB (complex),PRKAA1,PRKAA2,RELA,RUNX2,SIRT1,SMAD2,SMAD3,SQSTM1,STAT1,STAT3
mut vs wt d702factor 2x q05		EP300	-0.35	transcription regulator		-0.029		-0.164	0.576	0.000148	AR,BDKRB2,CDKN1A,CKB,CNN3,COL2A1,CRABP2,CXCL3,CYP1A1,FRMD4B,GNG2,GREB1,IGFBP6,IL6,ITGA9,ITGB2,ITGB7,KDR,LDHA,LEFTY1,MEF2C,NDRG1,NPR1,NTN1,PDE10A,PDK4,PDLIM4,POU5F1,SCN4B,SFTPC,SMOC1,TNC,TNFAIP3,ULBP2,VEGFA,XIST	CREBBP,CTNNB1,Creb,EGR1,EP300,FOXM1,HDAC1,JUN,KLF4,MEF2C,MYC,NFkB (complex),SMAD2,SMAD3,SMAD4,SP1,STAT3,TCF,TP53
mut vs wt d702factor 2x q05		MAPK7	-0.618	kinase		-0.024		-0.158	0.536	7.44e-07	ADAMTS1,ALDOC,BDNF,CDH2,CXCL2,CXCL3,IL1B,IL6,KLF2,MEF2C,NQO1,PDE3A,SERPINB2,VEGFA,VIM	CEBPB,Creb,ESR2,FOS,GATA2,GATA3,GATA4,JUN,JUND,MAPK7,MEF2C,MYC,NFE2L2,NFKB1,NFKBIA,NFkB (complex),PPARG,RELA,SIRT1,SMAD3,SP1,STAT3,TBX5,TP53
mut vs wt d702factor 2x q05		NEUROD1	-1.266	transcription regulator		-0.022		-0.168	0.346	0.019	CDKN1A,CHGA,INSM1,NEUROG3,PCSK1,SLIT2
mut vs wt d702factor 2x q05		simvastatin		chemical drug		-0.018		0.045	-0.222	5.15e-06	ACP5,ACTA2,ADAMTS1,ANXA1,APOB,AR,CCND2,CDKN1A,CRP,CXCL2,CXCL3,CYP2B6,GJA1,IGFBP3,IL1B,IL6,ITGB2,KLF2,LCN2,NFIX,NPPB,PCSK9,SPP1,VEGFA,VIM	AHR,CEBPA,CEBPB,FOS,IL1B,IL6,JUN,JUND,MYC,NFKB1,NFKBIA,NFkB (complex),PPARG,RELA,SP1,STAT3,TP53,simvastatin
mut vs wt d702factor 2x q05		cyclopamine		chemical reagent		-0.011		0.11	-0.273	0.00836	CDKN1A,CPA1,MYCN,PGC,SMO,SPP1	Akt,CTNNB1,EGR1,FOXO1,GLI1,GLI2,NFKB1,SMAD3,SP1,TP53,cyclopamine
mut vs wt d702factor 2x q05		BACH2	-0.25	transcription regulator		-0.011		0.077	-0.193	0.0421	EGLN3,IL6,LEF1,PDE3B,PRDM1,S100A9
mut vs wt d702factor 2x q05		NKX2-1	0.195	transcription regulator		-0.01		-0.1	0.247	1.24e-06	CLDN18,CYGB,DIO2,FAM3D,FOXF2,FXYD3,IGFBP6,LCN2,LEF1,LRP2,PDPN,SCARA3,SCD,SCGB1A1,SFTPC,SLC34A2,SLC6A14,SNAI2,TNC,TOX,UGT8,VEGFA,WNT11,ZNF519	CTNNB1,NKX2-1,SPDEF
mut vs wt d702factor 2x q05		SMARCD3	0.117	transcription regulator		0		-0.196	0.475	1.19e-05	COL2A1,DEPTOR,FMOD,HAPLN1,PITX2,SOX5,WNT5A	CTNNB1,FOXM1,JUN,SMAD4,SMARCD3,STAT3,TCF
mut vs wt d702factor 2x q05		FFAR3		g-protein coupled receptor		0		0.043	-0.154	4.13e-05	BCL11A,CCL28,CXCL10,FXYD3,GAS6,GBP6,IL1B,IL1RAP,LOXL2,PCP4,PCSK9,PITPNM3,SMOC1
mut vs wt d702factor 2x q05		BRD4	-0.171	kinase		0		-0.185	0.546	0.000141	ACSL5,ACTA2,CCND2,CCR1,COL5A1,CXCL2,INSM1,ITGA4,ITGA5,LOX,LOXL1,LOXL2,MYCN,NQO1,PRDM1,STC2,WNT5A	ATF4,BRD4,CDK9,CEBPB,CTNNB1,EP300,GATA4,IL6,JUN,MYC,NFKBIA,RELA,RNA polymerase II,SP1,STAT1,STAT3,TP53
mut vs wt d702factor 2x q05		APC	-0.37	enzyme		0		0.087	-0.244	0.000228	APCDD1,APOB,CCND2,CDH2,CDKN1A,CHGA,CXCL2,CXCL3,GLI3,IL6,MMP10,PDK4,SNAI2,SPP1,TIAM1,VEGFA	APC,CEBPB,CTNNB1,Creb,FOS,FOXM1,HDAC1,IL6,JUN,MYC,NFKB1,NFKBIA,NFkB (complex),PRKD1,RAC1,RELA,SMAD4,SP1,STAT3,TCF,TP53
mut vs wt d702factor 2x q05		5-O-mycolyl-beta-araf-(1->2)-5-O-mycolyl-alpha-araf-(1->1')-glycerol		chemical - endogenous non-mammalian		0		-0.164	0.567	0.000252	ADAMTS5,CHST2,CXCL10,CXCL2,CXCL3,IL1B,KYNU,NT5E,PDE4B,SERPINB2,SLAMF7,TNFAIP3	5-O-mycolyl-beta-araf-(1->2)-5-O-mycolyl-alpha-araf-(1->1')-glycerol,AHR,CEBPB,CXCL8,IL1B,JUN,NFKB1,NFKBIA,NFkB (complex),PPARG,RELA,STAT3,TNF
mut vs wt d702factor 2x q05		tiron		chemical reagent		0		0.157	-0.313	0.000561	CDKN1A,IL6,PLAUR,TNC	Akt,CEBPB,EGFR,EGR1,FOS,FOXO1,HIF1A,JUN,MAPK8,MYC,NFKB1,NFkB (complex),P38 MAPK,RELA,SMAD3,SP1,SRC,STAT3,ZFP36,tiron
mut vs wt d702factor 2x q05		PRKCI	-0.268	kinase		0		-0.109	0.238	0.00146	CXCL2,CXCL3,IL6,MMP10,SLC2A1,SLC2A2	AKT1,CEBPB,CTNNB1,Creb,FOXO3,IL6,JUN,MYC,NFE2L2,NFKB1,NFKBIA,NFkB (complex),PPARG,PRKCI,RELA,SMAD3,SP1,STAT1,STAT3,TP53
mut vs wt d702factor 2x q05		icatibant		biologic drug		0		0	0	0.00172	AGTR1,BDKRB2,CHRM2,CHRM3
mut vs wt d702factor 2x q05		ADAMTS18	0.035	peptidase		0		-0.171	0.418	0.00174	CDH10,CLDN8,COL8A1,COL9A2,ITGB7,SCUBE3
mut vs wt d702factor 2x q05		WDR5	0.059	transcription regulator		0		-0.117	0.235	0.002	CDH2,POU5F1,SPP1,VIM,WNT1	CTNNB1,FOXM1,Histone h3,JUN,KMT2A,MED1,RELA,RNA polymerase II,SMAD4,SP1,STAT3,TCF,WDR5
mut vs wt d702factor 2x q05		deferasirox		chemical drug		0		-0.196	0.48	0.00207	CD300A,GAS7,ITGB2,SLC2A14,SULF2,TNFSF10
mut vs wt d702factor 2x q05		MTPN	0.188	transcription regulator		0		-0.196	0.614	0.00251	ANXA1,APOD,CCND2,COL8A1,CP,FBLN1,GAS6,IL6,SPP1,TNFSF10	MTPN,NFKB1,NFKBIA,NFkB (complex),PPARG,RELA,STAT3,TP53
mut vs wt d702factor 2x q05		PRKAA2	-0.127	kinase		0		0.086	-0.293	0.00276	ACTA2,ARHGDIB,CDKN1A,CYP2B6,IL6,KCNQ2,KLHL29,LDHA,PRDM16,SYT4,TNS1,VIM	AHR,CTNNB1,Collagen type I (complex),FOXO1,FOXO3,HDAC1,HIF1A,ITGB1,NFKB1,NFKBIA,NFkB (complex),PPARGC1A,PRKAA1,PRKAA2,RELA,RNA polymerase II,RUNX2,SIRT1,SMAD2,SMAD3,STAT3
mut vs wt d702factor 2x q05		TERT	0.239	enzyme		0		-0.031	0.074	0.00368	ALDH1A3,AR,CD24,CDKN1A,IL1B,IL6,LIPG,MMP10,PLOD2,PLTP,POU5F1,SERPINB2,SPP1,VIM	AHR,CEBPB,CTNNB1,FOS,FOXM1,HDAC1,HIF1A,JUN,MYC,NFKB1,NFKBIA,NFkB (complex),P38 MAPK,RELA,SMAD3,SMAD4,SP1,SRC,STAT3,TCF,TERT,TP53,ZFP36
mut vs wt d702factor 2x q05		GC-GCR dimer		complex		0		-0.196	0.388	0.00396	ANXA1,CDKN1C,SCGB1A1,TAT
mut vs wt d702factor 2x q05		STK3	-0.012	kinase		0		0.024	-0.048	0.00396	IL6,PDPN,SFTPC,SPP1	AKT1,CEBPB,Creb,EGR1,ERK1/2,FOS,FOXO3,NFKB1,NFkB (complex),NKX2-1,SAV1,SP1,SPDEF,STAT3,STK3,TP53
mut vs wt d702factor 2x q05		3-deoxy-2-octulosonic acid(2)-lipid A		chemical - endogenous non-mammalian		0		-0.104	0.207	0.00501	CH25H,CXCL10,IL1B,IL6	3-deoxy-2-octulosonic acid(2)-lipid A,CXCL2,CXCL3,Ccl2,Creb,JUN,NFKB1,NFKBIA,NFkB (complex),RELA,SMAD3,STAT1,STAT3,TP53
mut vs wt d702factor 2x q05		PLX5622		chemical drug		0		-0.181	0.511	0.00638	CCR1,CCR3,CXCL10,CXCL13,CXCL6,IL1B,SPP1,TNFSF10,VEGFA
mut vs wt d702factor 2x q05		C1QA	1.064	other		0		-0.056	0.123	0.00818	CD274,CXCL10,IL6,LCN2,VIM	AHR,C1QA,C3,CEBPB,IL10,IL1B,IL6,JUN,NFKB1,NFKBIA,NFkB (complex),RELA,STAT3,TNF
mut vs wt d702factor 2x q05		PARK7	0.37	enzyme		0		0.009	-0.019	0.011	AR,IL1B,IL6,VIM
mut vs wt d702factor 2x q05		PARPBP	-0.444	other		0		-0.036	0.071	0.013	COL8A1,PLOD2,TIAM1,TNC
mut vs wt d702factor 2x q05		HNF1B	-0.039	transcription regulator		0		-0.008	0.023	0.0144	ALDOB,BGN,COL5A1,IGFBP3,MMP10,NID2,ONECUT1,PCSK9,PLAUR,SLC2A2,SNAI2
mut vs wt d702factor 2x q05		H2AB3 (includes others)		other		0		-0.196	0.48	0.0208	CDKN1A,CDKN1C,DCLK1,IGFN1,SAA1,SAA2
mut vs wt d702factor 2x q05		ROCK2	0.109	kinase		0		-0.143	0.283	0.0208	BATF,DSC2,DSP,IVL,PRDM1,SPP1
mut vs wt d702factor 2x q05		IGHM		transmembrane receptor		0		0.018	-0.036	0.0218	CCND2,CXCL13,IL1B,KLF2,SLAMF7
mut vs wt d702factor 2x q05		CD300LF	-0.074	other		0		-0.094	0.189	0.0264	IL1B,IL6,SLC2A1,SLC2A3
mut vs wt d702factor 2x q05		NKX2-2-AS1		other		0		-0.196	0.392	0.0264	CHCHD10,PDK1,PDK4,PRDM16
mut vs wt d702factor 2x q05		carbamylcholine		chemical drug		0		-0.095	0.189	0.0267	CDKN1A,CHRM2,CHRM3,NPR1,VEGFA
mut vs wt d702factor 2x q05		apomorphine		chemical drug		0		-0.014	0.028	0.0298	BDNF,CACNB3,GJA1,PTN
mut vs wt d702factor 2x q05		taurocholic acid		chemical - endogenous mammalian		0		-0.03	0.06	0.0334	IL1B,IL6,KDR,VEGFA
mut vs wt d702factor 2x q05		MSC	1.455	transcription regulator		0		-0.075	0.183	0.0339	ASB2,CHST4,ITGA9,PIEZO2,SLC51B,SPP1
mut vs wt d702factor 2x q05		bisphenol A		chemical - endogenous mammalian		0		-0.094	0.226	0.0432	APOB,AR,CDKN1A,CXCL10,KDR,LCN2,PFKFB4,POU5F1,SLC6A13,SLC6A14,SMOC1,SRD5A1
mut vs wt d702factor 2x q05		FGF2	-0.917	growth factor		0.004		-0.102	0.58	7.89e-10	ACTA2,ADAMTS5,AKR1B10,AR,BDNF,BGN,CCN4,CCND2,CDKN1A,CHRM3,COL3A1,CRYAB,CXCL2,CXCL6,CYGB,DCN,EGLN3,ENPP1,FAH,FRRS1,GJA1,GPNMB,IGFBP3,IL1B,IL6,ITGA4,ITGA5,KDR,LEF1,LOX,MYCN,NES,NEUROG3,PITX2,PLAUR,POU5F1,SCD,SEMA6D,SLC2A1,SNAI2,SPP1,TAT,TF,TNFSF10,VEGFA,VIM,WNT5A,ZFP57	AKT1,CEBPB,CTNNB1,FGF2,FN1,FOXM1,FOXO3,HIF1A,IGF1,IL6,JUN,NFKBIA,NFkB (complex),RELA,SMAD3,SMAD4,SP1,STAT3,TCF,TP53
mut vs wt d702factor 2x q05		wortmannin		chemical - kinase inhibitor		0.006		0.1	-0.438	6.38e-05	ACTA2,AGTR1,AR,BDNF,CCND2,CCR3,CDKN1A,CKB,COL3A1,CRP,CXCL10,HAPLN1,IL1B,IL6,KCNH8,NT5E,P4HA1,SOCS2,TNFSF10,TYMP,VEGFA,VIM	AGT,Akt,CEBPB,EGR1,EP300,FOXO1,HDAC1,JUN,MYC,NFKB1,NFKBIA,NFkB (complex),SMAD3,SP1,STAT3,TNF,TP53,wortmannin
mut vs wt d702factor 2x q05		staurosporine		chemical - kinase inhibitor		0.013		0.038	-0.122	0.000218	CCR3,CDKN1A,CYP1A1,CYP2A6 (includes others),H19,IL1B,IL1RAP,IL6,INHBB,ITGB2,NQO1,PRDM1,PTH1R,VDR,VEGFA	AHR,ARNT,CEBPB,Creb,ERK,ESR1,IL1B,JUN,JUND,NFE2L2,NFKBIA,NFkB (complex),P38 MAPK,PPARG,Pkc(s),RELA,SMAD3,STAT3,ZFP36,staurosporine,tetrachlorodibenzodioxin
mut vs wt d702factor 2x q05		PTH		other		0.013		-0.125	0.409	0.015	ADAMTS1,CDKN1A,COL2A1,CXCL2,GJA1,IGFBP3,IL6,LEF1,PTH1R,SFRP4,SPP1,STC1,TNS1,VDR
mut vs wt d702factor 2x q05		IL1R1	0.112	transmembrane receptor		0.014		-0.14	0.35	0.00106	ACTA2,APCS,CXCL10,CXCL2,CXCL3,IL1B,IL1RAP,IL6,SAA1	AHR,Creb,FOS,IL1B,IL1R1,JUN,MYD88,NFKB1,NFKBIA,NFkB (complex),PRKD1,RELA,SMAD3,STAT1,STAT3,TRAF3
mut vs wt d702factor 2x q05		FAS	0.847	transmembrane receptor		0.026		0.014	-0.028	0.000174	ACTA2,BCL11A,BGN,BTN3A3,CCR1,CCRL2,CD200,CDKN1A,COL3A1,COL5A1,COL8A1,CXCL10,CXCL2,CXCL3,CXCL6,F5,FES,GPNMB,IL1B,IL1RAP,IL6,INPP5D,MEF2C,PTX3,SERPINB2,SFTPC,SPP1,SYK,TNC,TNFAIP3,TNFSF10,VEGFA	CHUK,ERK,FAS,IKBKG,IL10,NFKB1,NFKBIA,NFkB (complex),PPARG,RELA,SMAD3,STAT1,STAT3,TP53
mut vs wt d702factor 2x q05		homocysteine		chemical - endogenous mammalian		0.028		-0.091	0.282	0.011	CDKN1A,CLDN5,CXCL10,IL1B,IL6,NDRG1,SAA1,SNAI2,VEGFA
mut vs wt d702factor 2x q05		NFKB1	-0.235	transcription regulator		0.031		-0.147	0.59	0.00362	AHRR,AR,CCND2,CDKN1A,COL2A1,CRP,CXCL10,CXCL2,CXCL3,GJA1,IGFBP3,IL1B,IL6,KCNT2,MMP10,NMI,NPPB,PTX3,SNAI2,TNFAIP3,TNFSF10,VEGFA,WT1	AHR,CEBPB,CTNNB1,HDAC3,JUN,KLF6,MYC,NFKB1,NFKBIA,NFkB (complex),PPARG,RELA,SMAD3,STAT1,STAT3,TNF,TP53
mut vs wt d702factor 2x q05		CAMP	-1.003	other		0.031		-0.112	0.307	0.0285	CXCL10,CXCL13,CXCL3,IL1B,IL1RAP,IL6,ITGB2,SNAI2,TNFAIP3
mut vs wt d702factor 2x q05		IL33	-0.731	cytokine		0.044		-0.14	0.606	0.00206	ADAMTS1,ALDH1A3,CASP1,CD70,CHST11,COL3A1,CXCL10,CXCL2,CXCL3,ELMO1,ENO2,IL1B,IL6,ITGA5,NT5E,SERPINB2,TACR1,TFEC,TNFAIP3,TNFSF10,TPH1	CXCL2,IL1,IL33,Ige,JUN,NFATC2,NFKB1,NFKBIA,NFkB (complex),PPARG,RELA,STAT3,TP53
mut vs wt d702factor 2x q05		fluoxetine		chemical drug		0.044		-0.071	0.239	0.0267	BDNF,FGFBP1,HTR2C,IL6,PDE4B,SLC2A3,TPH1,TSPOAP1
mut vs wt d702factor 2x q05		VCAN	-0.951	other		0.047		-0.021	0.141	6.31e-06	BDNF,C1R,CASP1,CDKN1A,CXCL2,CXCL3,CXCL6,DCN,FST,IFITM1,IL1B,IL6,INHBB,ITGA5,LCN2,MEF2C,MX2,OLFML2B,PCSK1N,SMOC1,VEGFA	AHR,CEBPB,Creb,EGR1,ERK,ERK1/2,F7,FOS,JUN,NFKB1,NFKBIA,NFkB (complex),P38 MAPK,PPARG,RELA,SMAD3,SP1,STAT3,VCAN,ZFP36
mut vs wt d702factor 2x q05		MMP9	-0.41	peptidase		0.051		-0.056	0.208	0.0019	ACTA2,CDKN1A,CLDN5,CXCL2,CXCL6,GJA1,HPGD,IL6,VEGFA,VIM	AHR,AKT1,CEBPB,CTNNB1,Creb,EGR1,FOXM1,FOXO3,IL4,JUN,MMP9,NFKB1,NFKBIA,NFkB (complex),RELA,SMAD3,SMAD4,SP1,STAT3,TCF,TP53,VEGFA
mut vs wt d702factor 2x q05		N-nitro-L-arginine methyl ester		chemical drug		0.052		-0.002	0.059	0.00329	AGTR1,APLN,BGN,COL3A1,CXCL2,CXCL3,GJA1,IL1B,IL6,PDK4,VEGFA	CEBPB,ERK,FAS,ITGB2,JUN,N-nitro-L-arginine methyl ester,NFKB1,NFKBIA,NFkB (complex),P38 MAPK,PPARG,RELA,SMAD3,STAT1,STAT3,TNF,ZFP36
mut vs wt d702factor 2x q05		MAP2K4	0.094	kinase		0.054		-0.172	0.471	0.0365	CDKN1A,CRP,CXCL10,IL6,MEF2C,VDR
mut vs wt d702factor 2x q05		MAP2K1	-0.031	kinase		0.055		-0.155	0.695	2.91e-06	ACTA2,CD274,CDKN1A,COL3A1,CRP,CRYAB,CSTA,CXCL3,ENO2,GPRC5B,IL13RA2,IL6,ITGA5,IVL,LEF1,MYCN,PLAUR,SNAI2,SULT1E1,TNC,TNFRSF11A,TNFSF10,UNC5B,VEGFA	Akt,CEBPB,EGFR,EGR1,FOXO1,HIF1A,IL6,JUN,MAP2K1,MAPK14,NFKB1,NFKBIA,RELA,SMAD3,SMAD4,SP1,STAT3,TGFB1,TP53,TP73
mut vs wt d702factor 2x q05		TNIP1	-0.273	other		0.059		0.126	-0.244	0.00742	CCR1,CXCL2,CXCL3,IL1B,LCN2,S100A9	CXCL8,HDAC3,IFNB1,IKBKG,Interferon alpha,NFKB1,NFKBIA,NFkB (complex),PPARG,RELA,STAT1,STAT3,TNIP1
mut vs wt d702factor 2x q05		TRPM2	1.25	ion channel		0.06		-0.047	0.181	0.000331	CXCL3,ENO2,IL1B,LDHA,NDUFA4L2,SLC2A1,VEGFA	AHR,CEBPB,Creb,EGR1,ERK1/2,FOS,IFNG,JUN,NFKB1,NFKBIA,NFkB (complex),RELA,SMAD3,SP1,STAT1,STAT3,TNF,TRPM2
mut vs wt d702factor 2x q05		NAMPT	0.178	cytokine		0.061		-0.103	0.377	1.68e-06	BDNF,CCR3,CXCL10,CXCL2,IL6,LEF1,NAT1,SOCS2,TFAP2A,TMSB15A,WNT5A	FOXO1,FOXO3,Gm21596/Hmgb1,Histone h3,KMT2A,MED1,NAMPT,NFATC2,NFE2L2,NFKB1,NFKBIA,NFkB (complex),NOTCH1,PARP1,PPARG,RELA,RNA polymerase II,SP1,STAT3,TP53,Vegf
mut vs wt d702factor 2x q05		IL6R	0.094	transmembrane receptor		0.063		-0.116	0.435	6.89e-05	ACTA2,CDKN1A,COL2A1,CXCL10,CXCL2,CXCL3,CXCL6,IL1B,IL6,LCN2,SAA1,TNFRSF11A,VEGFA	AHR,CEBPB,CTNNB1,ERK,IL6,IL6R,JUN,MYC,NFKB1,NFKBIA,NFkB (complex),PPARG,RELA,SMAD3,STAT1,STAT3
mut vs wt d702factor 2x q05		CREBBP	-0.217	transcription regulator		0.064		-0.13	0.47	0.00321	AR,BDKRB2,CCND2,CDKN1A,CKB,CNN3,COL2A1,CXCL10,FRMD4B,GNG2,IL6,INHA,ITGA9,ITGB7,KLF2,MEF2C,NDRG1,NTN1,PDE10A,PDE3B,PDLIM4,SCN4B,SMOC1,TNC,TNFAIP3,TNFSF10,ULBP2,VEGFA,XIST	CREBBP,CTNNB1,EGR1,EP300,HDAC1,Hdac,Histone h3,Histone h4,JUN,KLF4,KMT2A,MED1,MYC,RELA,RNA polymerase II,SMAD3,SP1,STAT3,TP53
mut vs wt d702factor 2x q05		trichostatin A		chemical drug		0.079		-0.049	0.451	3.45e-06	ADAMTS1,ADAMTS5,AR,BCL11A,BDNF,BMP5,CA9,CCND2,CCR3,CDH2,CDKN1A,CDKN1C,CGREF1,COCH,COL2A1,CRABP2,CXCL10,CXCL3,CYP1A1,CYP2A6 (includes others),CYP4B1,DIRAS3,FBLN1,FES,FOXC1,FOXF2,FRZB,FST,GLI3,GREB1,IFITM1,IGFBP3,IL1B,IL1RAP,IL6,INPP5F,KDR,LEF1,LOX,MAMLD1,MAPK12,METRN,MSI1,MYCN,NDRG1,NEFL,NEUROG3,NQO1,OPRK1,PLCB1,POU5F1,PRDM1,SEMA3A,SFRP4,SLC2A1,SMO,SPP1,STC2,TAT,THSD4,TIAM1,TNC,TNFSF10,UNC5C,VEGFA…	Akt,CTNNB1,EGR1,EP300,ESR1,ESR2,FOS,FOXO1,HDAC1,JUN,MYC,NFKB1,SMAD3,SP1,STAT3,TP53,decitabine,trichostatin A
mut vs wt d702factor 2x q05		NR1H4	-0.001	ligand-dependent nuclear receptor		0.08		0.005	0.062	0.0214	ABCC2,ACTA2,CCL15,CYP2B6,IL1B,IL6,LCN2,LDHA,PLTP,PNMT,SLC51B,SPP1,SULT1E1,UGT1A1
mut vs wt d702factor 2x q05		testosterone propionate		chemical drug		0.091		-0.065	0.235	0.0452	AR,DMBT1,FBXO32,SAA1,SRD5A1
mut vs wt d702factor 2x q05		tyrphostin AG 1478		chemical - kinase inhibitor		0.097		0.152	-0.33	0.0123	CDKN1A,COL8A1,HAPLN1,IL13RA2,IL6,KCNH8,NPPB,SLC2A1
mut vs wt d702factor 2x q05		NFKBIZ	-0.54	transcription regulator		0.101		-0.136	0.364	0.0232	CXCL3,IL6,LCN2,S100A9
mut vs wt d702factor 2x q05		STAP2	0.04	other		0.105		-0.131	0.365	0.00922	APCS,CCR1,CXCL2,IL6	CTNNB1,ERK,JUN,MYC,NFkB (complex),PPARG,RELA,SMAD3,STAP2,STAT1,STAT3
mut vs wt d702factor 2x q05		NOS2	0.493	enzyme		0.111		-0.024	0.203	0.0164	AR,CDKN1A,CP,CXCL2,CXCL3,GJA1,H19,IL1B,IL6,KDR,LCN2,TNFSF10,TNNT2,TNNT3,VEGFA
mut vs wt d702factor 2x q05		estrogen receptor		group		0.12		0.016	0.034	5.36e-08	ABCG2,ANXA1,BDNF,CCND2,CD24,CDH10,COL5A1,COL9A2,CYP1A1,CYP2B6,DSC2,DSP,FLNC,GREB1,IL6,KISS1R,LOXL2,MAN1A1,MAPK12,NT5E,PCDH18,PCDH19,PDK4,PLAUR,SNAI2,TMEFF1,TMOD1,TNC,UGT8,VEGFA,VIM,WNT5A	CEBPB,CTNNB1,EGF,ESR1,FOS,HDAC1,HIF1A,JUN,JUND,MYC,POU5F1,PPARG,SMAD3,SP1,SRC,STAT3,TP53,estrogen receptor,tamoxifen
mut vs wt d702factor 2x q05		Sb202190		chemical - kinase inhibitor		0.12		0.135	-0.426	1.44e-05	ACTA2,ALOX5,CCND2,CDH2,CDKN1A,CRP,CXCL10,CYP1A1,HAPLN1,IL1B,IL6,IVL,P4HA1,SNAI2,TYMP,VDR,VEGFA,VIM	AHR,CEBPA,CEBPB,Creb,EGR1,ERK1/2,FOS,JUN,JUND,MAPK14,MYC,NFKB1,NFkB (complex),PPARG,SMAD3,SMAD4,SMAD7,SP1,STAT3,Sb202190,TP53,TP73
mut vs wt d702factor 2x q05		RARB	-0.119	ligand-dependent nuclear receptor		0.126		-0.063	0.398	1.6e-05	ATP6V0A4,CDKN1A,CHGA,CRYAB,CXCL2,GBP6,GSDMC,HOXA3,IFITM1,IGFBP3,IGFBP6,IL1B,IL6,NTN1,PITX2,POU5F1,SAA1,SLC2A1,SPP1,VEGFA,ZFP42	CTNNB1,Creb,EGR1,ERK1/2,FOS,JUN,JUND,MYC,NCOA2,NFKB1,NFKBIA,NFkB (complex),POU5F1,PPARG,RARA,RARB,RXRA,SMAD3,SP1,STAT1,STAT3,THRB,TP53,tretinoin
mut vs wt d702factor 2x q05		sulindac sulfide		chemical drug		0.126		0.029	0.051	0.0105	CDKN1A,CYP1A1,CYP1B1,LDHA,NQO1,RRM2B,STC1,STC2
mut vs wt d702factor 2x q05		SMAD7	0.056	transcription regulator		0.127		0.057	-0.146	2.96e-08	ACTA2,ADH1C,ALDOB,BGN,BMP5,CDH2,CDKN1A,CGREF1,COL2A1,COL3A1,CRP,CXCL10,CYP1A2,DCN,DEPTOR,FST,GAS6,IL1B,NID2,PITX2,POU5F1,SCD,SFTPC,VEGFA	AHR,AR,Akt,CTNNB1,EGR1,FOXO1,JUN,NFKB1,NFkB (complex),RAC1,RELA,SMAD2,SMAD3,SMAD4,SMAD7,SP1,STAT3
mut vs wt d702factor 2x q05		HMOX1	0.05	enzyme		0.127		0.034	0.007	0.00034	ACTA2,ANGPTL3,BDNF,CD274,CDKN1A,CXCL10,CXCL2,CXCL3,CYP1A1,IL1B,IL6,KDR,NQO1,TYMP,VEGFA	AHR,CEBPB,Ccl2,Creb,ERK,HMOX1,JUN,NFE2L2,NFKB1,NFKBIA,NFkB (complex),PPARG,RELA,SMAD3,STAT3,TNF
mut vs wt d702factor 2x q05		vitamin K2		chemical drug		0.128		-0.175	0.554	9.95e-05	AGTR1,AKR1C1/AKR1C2,AR,CD24,GPRC5B,SPP1
mut vs wt d702factor 2x q05		JAG2	-0.642	growth factor		0.128		0.105	-0.128	0.00579	CCR1,CXCL3,CXCL6,IL1B,IL6,SPP1
mut vs wt d702factor 2x q05		epicatechin		chemical drug		0.128		0.017	0.087	0.0129	CLCA2,CYB5R2,IL1B,MAPK12,MFAP2,SNAP25
mut vs wt d702factor 2x q05		FASN	0.301	enzyme		0.13		-0.104	0.36	0.0274	ACTA2,ALOX5,CDH2,IL1B,IL6,SCD,VIM
mut vs wt d702factor 2x q05		SMTNL1	-0.07	other		0.132		0.101	-0.069	0.0334	FLNC,GJA1,MYOM2,TNNT3
mut vs wt d702factor 2x q05		NOSTRIN	-0.443	transcription regulator		0.132		0.196	-0.257	0.0458	IL6,ITGA5,KDR,NPR1
mut vs wt d702factor 2x q05		ERK		group		0.141		-0.125	0.779	2.62e-07	ACP5,ACSL5,ACTA2,BGN,CCR1,CDKN1A,COL3A1,CXCL10,CXCL2,CXCL6,CYP1A1,DIO2,FST,IL1B,IL6,ITGB2,KYNU,LCN2,NDRG1,PDK4,PIWIL1,POU5F1,PRDM1,RGS4,SERPINB2,SFTPC,SLC2A1,SNAI2,TYMP,VEGFA	AHR,Akt,CEBPB,CTNNB1,Creb,EGR1,ERK,FOXO1,HMOX1,JUN,MYC,NFE2L2,NFKB1,NFKBIA,NFkB (complex),RELA,SMAD3,SMAD4,SMAD7,SP1,STAT1,STAT3,TNF
mut vs wt d702factor 2x q05		CSF3	-1.612	cytokine		0.142		-0.055	0.327	0.0402	AGTR1,BATF,CCND2,CXCL2,CXCL3,GJA1,IL6,ITGB2,LCN2,PIWIL1,TNFAIP3,TNFSF10,VEGFA
mut vs wt d702factor 2x q05		SB203580		chemical - kinase inhibitor		0.144		0.163	-0.984	1.28e-10	ACTA2,ANXA1,ARHGDIB,BDNF,CCRL2,CD200,CD274,CDH2,CDKN1A,CLDN5,COL3A1,CRP,CRYAB,CXCL10,CXCL3,CYP1A1,CYP1B1,DUOX2,GJA1,GLRX,GMPR,HAPLN1,IGFBP3,IL13RA2,IL1B,IL6,ITGA4,IVL,KDR,KRT23,MAPK12,MMP10,NPPB,NPR1,NQO1,P4HA1,PCP4,PDE4B,PLA1A,PLAUR,PTPRG,RCN3,SLC26A9,SPP1,STC2,TAT,TMEM52B,TNFSF10,TOX,TYMP,VDR,VEGFA,VIM	CEBPB,FOS,IL4,JUN,JUND,MAPK14,MYC,NFKBIA,NFkB (complex),P38 MAPK,SB203580,SP1,STAT3,TNF,TP53,TP73,ZFP36
mut vs wt d702factor 2x q05		WNT3A	-0.211	cytokine		0.144		-0.1	0.699	1.29e-07	ACTA2,ADGRF1,ALDH1A3,BDNF,BGN,CCN4,CCND2,CD274,CD300A,CDH2,COL2A1,DCLK1,DCN,FMOD,GPNMB,IL6,KDR,LCN2,LEF1,MEF2C,NDNF,PITX2,PIWIL1,POU5F1,PRDM1,PTH1R,SIM1,SSTR2,TNC,VEGFA,VIM,WNT1,WNT11,WNT5A	Akt,CTNNB1,EGR1,FOXM1,FOXO1,FOXO3,GLI1,JUN,MYC,NFKB1,PI3K (complex),SMAD3,SMAD4,SP1,STAT3,TCF,TP53,WNT3A
mut vs wt d702factor 2x q05		dihydrotestosterone		chemical - endogenous mammalian		0.148		-0.095	0.69	4.42e-06	ADAMTS1,ADH1C,AGTR1,ALDH1A3,APOD,AR,BGN,CASP1,CCND2,CDH2,CDKN1A,CDO1,COL3A1,CYP4B1,DCN,DIO2,FBXO32,FOXE1,FST,GAS6,GREB1,HPGD,IGFBP3,IGFBP7,IL6,INHBB,IRS4,LDHA,LEF1,LOX,MYRIP,NAT1,NDRG1,NID2,NNAT,SCD,SFRP4,SFTPC,SLC2A1,SLC2A3,SLC4A4,SNAI2,SPP1,SRD5A1,SULT1E1,TF,TNFSF10,VEGFA,VIM,WNT5A	AR,BRCA1,CEBPB,CTNNB1,EGF,ESR1,ESR2,JUN,MYC,NFkB (complex),NR1I2,PGR,SMAD3,SP1,STAT3,TP53,beta-estradiol,dihydrotestosterone,progesterone
mut vs wt d702factor 2x q05		DNAJB6	-0.016	transcription regulator		0.152		0.073	0.007	0.00501	CDH2,SNAI2,SPP1,VIM	AKT1,CEBPB,CTNNB1,DNAJB6,FOXO3,NFE2L2,NFKBIA,NFkB (complex),RELA,SNAI2,SP1,SPARC,SPP1,STAT3,TP53
mut vs wt d702factor 2x q05		AS1842856		chemical reagent		0.152		0.196	-0.236	0.00922	CXCL10,FBXO32,IL6,TNFSF10
mut vs wt d702factor 2x q05		UBE2I	-0.148	enzyme		0.152		0.014	0.125	0.0123	CXCL10,PDK4,PRDM16,SLC2A1,SLC51B
mut vs wt d702factor 2x q05		BCAP31	0.451	transporter		0.152		0.138	-0.121	0.0264	CXCL10,IL1B,SAA1,SCD
mut vs wt d702factor 2x q05		ROCK1	-0.105	kinase		0.152		-0.182	0.513	0.0334	CCND2,COL3A1,COL5A1,COL8A1
mut vs wt d702factor 2x q05		NFkB (complex)		complex		0.154		-0.166	1.269	4.58e-06	ADRA2A,ALDH1A3,BATF,BCL11A,BDNF,C1R,CASP1,CCND2,CD274,CDKN1A,CGREF1,COL2A1,CRP,CXCL10,CXCL2,CXCL3,CXCL6,DMBT1,DOK5,ENPP1,FST,GAS6,IL13RA2,IL1B,IL6,KCND3,KDR,KYNU,LCN2,LGALS7/LGALS7B,NCOA7,NPPB,PRDM1,PTX3,RAB3C,SAA1,SERPINB2,SLC16A3,SLC22A4,SLC2A1,SLC2A2,SLIT2,SNAI2,SOX5,SPP1,TACR1,TFEC,TNFAIP3,TNFRSF10C,TNFSF10,VEGFA,VIM,WNT5A	AHR,CEBPB,CTNNB1,IL1B,JUN,KLF6,MYC,NFKB1,NFKBIA,NFkB (complex),RELA,SMAD3,SP1,STAT1,STAT3,TNF,TP53
mut vs wt d702factor 2x q05		IFNGR1	0.149	transmembrane receptor		0.156		-0.122	0.327	0.0452	CXCL10,CXCL3,CXCL6,IL1B,IL6
mut vs wt d702factor 2x q05		SPARC	-0.643	other		0.159		0.028	0.05	6.7e-05	AKR1C3,CHRNA2,CTSF,CYP1A1,DAB1,H3C4,IL6,LEF1,NDRG1,NES,SERPINA7,SLC34A2,SNAI2,TMEM45A,VIM	Akt,CTNNB1,Ca2+,Creb,EGR1,ERK,FOXM1,FOXO1,JUN,NFKB1,NFkB (complex),PPARG,RELA,RUNX2,SMAD3,SMAD4,SNAI2,SP1,SPARC,STAT3,TCF,TP53
mut vs wt d702factor 2x q05		calphostin C		chemical - kinase inhibitor		0.16		0.17	-0.283	0.00817	ACTA2,CDKN1A,IL6,NPPB,NQO1,NTN1,SLC2A1,VEGFA	AHR,CEBPB,CTNNB1,Creb,EDN1,ESR1,FN1,FOXO3,HIF1A,JUN,JUND,MMP9,NFKB1,NFKBIA,NFkB (complex),Pkc(s),RELA,SMAD3,SP1,STAT3,TNF,calphostin C
mut vs wt d702factor 2x q05		BRD7	-0.031	transcription regulator		0.161		-0.157	0.533	0.00032	CDKN1A,CYP1A1,NDRG1,RRM2B,VIM,ZMAT3	AHR,AR,BRCA1,BRD7,ESR1,HDAC1,JUN,MYC,NFkB (complex),SMAD3,SMAD4,SMAD7,SNAI2,SP1,STAT3,TP53
mut vs wt d702factor 2x q05		thapsigargin		chemical toxicant		0.162		-0.104	0.609	0.00037	ABCA12,ABCG2,AR,BDNF,CA9,CDKN1A,COL2A1,CP,CXCL10,CXCL2,CXCL3,DIO2,HAPLN1,IL1B,IL6,ITGA4,ITGB2,MEF2C,TNFSF10,VEGFA	AHR,AR,CEBPB,CTNNB1,EGR1,FOXM1,JUN,NFKB1,NFKBIA,NFkB (complex),P38 MAPK,RELA,SIRT1,SMAD3,SMAD4,SP1,STAT3,TCF,TP53,ZFP36,thapsigargin
mut vs wt d702factor 2x q05		FOXO3	0.009	transcription regulator		0.163		-0.041	0.35	1.1e-05	ACTA2,ANXA1,APLN,AR,CARD16,CCND2,CDKN1A,CDKN1C,CH25H,CTSV,CXCL10,DOK5,ENO2,FBXO32,FLT4,FMOD,FOXC1,IGFBP7,IL6,ITGB2,KIF15,LCN2,MEF2C,NDRG1,NT5E,PDE3B,PRDM1,PTPRB,SLIT2,SOX5,TNFSF10,VEGFA,VIM	AKT1,Akt,CEBPB,CTNNB1,EGR1,FOXO1,FOXO3,NFATC1,NFKB1,NFKBIA,NFkB (complex),NOTCH1,PPARG,PPARGC1A,RELA,SIRT1,SMAD3,SP1,STAT3,TP53,Vegf
mut vs wt d702factor 2x q05		mitoxantrone		chemical drug		0.165		-0.049	0.281	0.00657	ABCG2,CDKN1A,CXCL10,IL1B,IL6,VEGFA	CEBPB,EGR1,EP300,HDAC1,JUN,MYC,NFKB1,NFKBIA,NFkB (complex),PPARG,RELA,SMAD3,SP1,STAT3,TP53,mitoxantrone
mut vs wt d702factor 2x q05		mir-218		microrna		0.169		0.176	-0.173	0.00922	CDH2,LEF1,MDGA1,NT5E
mut vs wt d702factor 2x q05		MERTK	0.319	kinase		0.171		0	0.171	0.00508	CD274,CD70,IL1B,IL6,RGCC,SLA	Akt,CEBPB,CTNNB1,EGR1,FOXO1,FOXO3,IL10,JUN,MERTK,NFKB1,NFKBIA,NFkB (complex),P38 MAPK,PI3K (complex),RELA,SMAD3,SP1,STAT3,TNF,ZFP36
mut vs wt d702factor 2x q05		INHA	-2.162	growth factor		0.177		0.004	0.162	9.36e-06	ACTA2,ADAMTS1,CCN4,CCND2,COCH,COL3A1,CYP1B1,EMILIN2,FST,GJC1,HSD17B2,INHA,INHBB,ITGA9,PTX3,SFRP4	CREB1,CTNNB1,EGR1,FSH,INHA,INHBA,JUN,NFkB (complex),SMAD2,SMAD3,SMAD7
mut vs wt d702factor 2x q05		titanium dioxide		chemical drug		0.179		-0.07	0.333	0.00605	CDKN1A,CRYAB,IL1B,IL6,INHA	CEBPB,IL1A,NFKBIA,NFkB (complex),RELA,STAT3,titanium dioxide
mut vs wt d702factor 2x q05		ACOX1	0.047	enzyme		0.18		0.036	0.051	0.00368	ADAMTS1,APCS,CDKN1A,CTSV,CYP1A2,FAH,GSDMC,HAL,IL1RAP,KRT23,LCN2,PDK4,SLC4A4,UGT8
mut vs wt d702factor 2x q05		TRIM28	-0.052	transcription regulator		0.186		-0.117	0.469	0.0237	BMP5,CXCL10,IL6,KLF2,ONECUT1,S100A9,WNT5A
mut vs wt d702factor 2x q05		ZFP36	0.067	transcription regulator		0.187		0.18	-0.344	0.000479	AHRR,CDKN1A,COL3A1,CXCL2,CXCL3,IL1B,IL6,LCN2,PLAUR,PRDM1,S100A9,SPP1	CEBPB,CTNNB1,IL10,IL6,JUN,MYC,NFKB1,NFKBIA,NFkB (complex),PPARG,RELA,STAT1,STAT3,TNF,ZFP36
mut vs wt d702factor 2x q05		S100A4	-0.485	other		0.192		-0.122	0.433	0.0352	CDKN1A,CXCL3,S100A9,SAA1,VIM
mut vs wt d702factor 2x q05		sorafenib		chemical drug		0.2		0.075	0.036	0.00937	ACTA2,CCND2,CXCL10,IL1B,KDR,VIM	AHR,CTNNB1,FOXM1,JUN,MYC,Mek,NFKB1,NFKBIA,NFkB (complex),PPARG,RELA,SMAD3,SP1,STAT1,STAT3,TP53,bortezomib,sorafenib
mut vs wt d702factor 2x q05		IL4	1.735	cytokine		0.201		-0.102	0.884	0.00869	ACP5,ACTA2,ALDOC,ALOX15B,ALOX5,ANXA1,BCL11A,BDNF,CCND2,CCR3,CD200,CD274,CD300A,CDKN1A,CLDN5,CXCL10,CXCL2,CXCL3,CXCL6,CYRIA,DUOX2,DUOXA2,GBP6,GJA1,GLIPR2,GNA15,HLX,HPGD,IL13RA2,IL1B,IL6,ITGA4,ITGB2,ITGB7,LEF1,LIPG,MMP10,NDRG1,PDE4B,PDK1,PLBD1,PLOD2,PRDM1,S100A9,SLAMF7,SLC2A1,SOCS2,SPP1,SYK,TACR1,TFEC,TNC,TNFRSF11A,TUBA3E,VDR,VEGFA,VIM,VIPR1,XCL1	CEBPB,CTNNB1,FOXO3,IFNG,IL10,IL2,IL4,JUN,MYC,NFKB1,NFKBIA,NFkB (complex),RELA,STAT1,STAT3,TNF
mut vs wt d702factor 2x q05		HOTAIR	0.695	other		0.202		0.004	0.192	0.0129	ACTA2,CDH2,CDKN1A,GREB1,IFITM1,IL6
mut vs wt d702factor 2x q05		TP73	-0.152	transcription regulator		0.206		-0.058	0.553	2.72e-06	ACTA2,ADAM23,BDKRB2,C1R,CADM1,CASP1,CDKN1A,CDKN1C,CLMN,CNN3,CRYAB,CXCL10,CXCL2,CXCL3,DAB1,DMC1,FST,GPNMB,IGFBP3,IL1B,IL6,ITGA5,IVL,LDHA,MMP23B,MYCN,NRGN,PDK1,PDPN,PIEZO2,RRM2B,SERPINA5,SMO,SNAI2,SPP1,TBX1,VDR,VEGFA,ZMAT3	AR,CTNNB1,HDAC1,HIF1A,Hdac,Hif1,Histone h4,JUN,MED1,MYC,NFkB (complex),PPARG,RELA,SNAI1,SP1,STAT1,STAT3,TP53,TP63,TP73,VHL
mut vs wt d702factor 2x q05		TSC2	0.129	other		0.209		0.098	-0.109	0.00153	ANXA1,CASP1,CCND2,CDKN1A,CP,CRYAB,CXCL10,EMP3,ERO1A,GPNMB,METRN,PDK4,SCD,SLC2A1	AKT1,Akt,CEBPB,CTNNB1,EGR1,FOXO1,FOXO3,IL6,JUN,MYC,NFKB1,NFKBIA,NFkB (complex),RELA,SMAD3,SP1,STAT1,STAT3,TP53,TSC2
mut vs wt d702factor 2x q05		RAS		group		0.211		-0.127	0.553	0.0284	CD274,CDKN1A,CXCL10,IL1B,IL6,IVL,PLAUR,PRDM1,SNAI2,VEGFA,VIM
mut vs wt d702factor 2x q05		HIC1	-0.229	transcription regulator		0.213		0.034	0.112	0.000237	ACTA2,CDKN1A,CDKN1C,CDO1,FST,GPR161,LCN2,SNAP25,SPP1,TRIM16L	Akt,EGR1,EZH2,FOXO1,GATA3,HDAC1,HIC1,NFKB1,SMAD3,SP1,STAT3
mut vs wt d702factor 2x q05		corticosterone		chemical - endogenous mammalian		0.217		-0.02	0.291	0.00132	ANXA1,APOB,BDKRB2,BDNF,CDKN1A,CLDN5,COL3A1,DIO2,H19,IL6,PDK4,SERPINA7,SLC2A2,TAT	AR,CEBPB,CRH,Creb,EGR1,ERK1/2,ESR1,FOS,JUN,JUNB,NFKB1,NFkB (complex),NR3C2,P38 MAPK,PRL,SP1,STAT3,STAT5B,TP53,ZFP36,aldosterone,corticosterone
mut vs wt d702factor 2x q05		CNTF	-0.584	cytokine		0.222		-0.036	0.315	0.0251	CNR1,CRP,GJA1,PDE10A,SCD,SOCS2,VIM,WNT5A
mut vs wt d702factor 2x q05		BDNF	1.117	growth factor		0.223		-0.083	0.567	0.00094	AR,BDNF,CCND2,CDKN1A,CHGA,CNR1,CP,CPLX2,CYGB,CYRIA,DPYSL3,IL6,INHBB,LCN2,MYCN,NPR1,P4HA1,PLTP,RGS4,S100A9,SNAP25,SOSTDC1,SPP1,TIAM1,TMEM45A,TPH1,VIM	AR,BDNF,CREB1,EGR1,EP300,HDAC1,Histone h3,JUN,KMT2A,LEP,MED1,NFKB1,NFkB (complex),NTRK2,PPARG,RELA,RNA polymerase II,SIRT1,SMAD3,SP1,STAT3,TP53
mut vs wt d702factor 2x q05		NR1H2	0.073	ligand-dependent nuclear receptor		0.226		-0.013	0.272	0.00012	APCS,CH25H,CRP,CXCL10,CXCL2,DIO2,IL1B,IL6,PLTP,PRDM16,SCD,SLC2A2,TBX1,VEGFA	AKT1,CEBPB,Ccl2,FOXO3,IL6,JUN,NCOA2,NFE2L2,NFKBIA,NFkB (complex),NR1H2,PPARG,RARA,RARB,RELA,RXRA,SP1,SREBF1,STAT3,THRB,TP53,cholesterol
mut vs wt d702factor 2x q05		NKX2-3		transcription regulator		0.23		-0.004	0.249	0.00303	ACTA2,ARHGDIB,C2CD4B,CASP1,CDKN1A,CRYAB,DCLK1,FBN2,GMPR,H2AC18/H2AC19,HCG4,HSD17B2,KLF2,PLA1A,PLCB1,SAMD9,SEMA3A,TYMP,ZMAT3
mut vs wt d702factor 2x q05		desipramine		chemical drug		0.232		-0.018	0.275	3.37e-05	ADRA2A,BDNF,CDKN1A,FGFBP1,IL1B,IL6,PDE4B	ARRB2,CEBPB,CTNNB1,Ca2+,Creb,FOS,JUN,JUND,MAPK8,MYC,NFkB (complex),P38 MAPK,RELA,SMAD3,SP1,STAT3,TP53,ZFP36,desipramine
mut vs wt d702factor 2x q05		Y 27632		chemical drug		0.24		0.073	0.067	0.0406	ACTA2,CDKN1A,CLDN5,COL2A1,IL6,SOX5,VIM
mut vs wt d702factor 2x q05		PPIF	0.515	enzyme		0.243		-0.01	0.285	4.94e-07	CCR1,CCRL2,CXCL10,CXCL2,CXCL3,CXCL6,CXCR6,IL6,INHBB,MEIS2,PDK4,PITX2,PTN,TBX1,TFAP2A,WNT5A,XCL1	CTNNB1,JUN,MYC,NFkB (complex),PPIF,STAT1,STAT3
mut vs wt d702factor 2x q05		clofibrate		chemical drug		0.246		-0.096	0.529	0.0255	ABCG2,CCND2,CYP1A1,CYP1A2,IL6,NQO1,PCSK9,SCD,SLC2A2
mut vs wt d702factor 2x q05		imipramine		chemical drug		0.252		-0.098	0.418	0.0298	BDNF,SLC2A3,TACR1,TSPOAP1
mut vs wt d702factor 2x q05		CXCL12	-0.566	cytokine		0.254		-0.115	0.779	5.1e-05	ACP5,ACTA2,AKR1C3,CDKN1C,CXCL10,CXCR6,CYP2A6 (includes others),GOPC,IGFBP7,IL1B,IL6,LOXL2,MAPK12,PPEF1,SAA2,SOCS2,SORBS3,TF,TNFRSF10C,TNFRSF11A,TNFSF10,VIM	CEBPB,CXCL12,CXCR4,Creb,EGR1,FOXO1,FOXO3,HIF1A,IL6,JAK2,JUN,MYC,NFE2L2,NFKB1,NFKBIA,NFkB (complex),PI3K (family),RELA,SQSTM1,STAT1,STAT3,TP53,VHL
mut vs wt d702factor 2x q05		ETV6-RUNX1		fusion gene/product		0.261		0.139	-0.371	0.00952	ALOX5,BCL11A,CD70,CDH2,EMP3,GMPR,GNA15,GREB1,H4C8,IFITM1,ITGA4,ITGB2,KCNJ2,NMI,PCDH18,PCP4,PDE4B,SPP1,TDRD9,TFEB,TNFSF10,WT1,ZMAT3
mut vs wt d702factor 2x q05		cisplatin		chemical drug		0.264		-0.074	0.775	0.000322	ABCC2,ACTA2,ADAMTS1,AKR1C1/AKR1C2,ALDH1A3,ANXA1,APOA2,CASP1,CCR1,CDKN1A,CDKN1C,CDO1,CP,CXCL10,CXCL3,EFEMP2,EMP3,GABRB2,GPNMB,GPX2,HAVCR1,HYAL1,IFITM1,IGFBP3,IL1B,IL6,INPP5D,LCN2,LGALS7/LGALS7B,MYCN,NEFL,NES,NMI,NQO1,PDE3B,PDK4,PLA1A,POU5F1,PRTFDC1,RRM2B,SCN4B,SLC2A1,SLC2A3,SLC34A2,SPP1,SULF2,TFAP2A,TNFRSF10C,TNFSF10,TYMP,UGT1A3,VIM,WT1,ZFP37,ZMAT3	Akt,BCL3,CEBPB,CSF2,Creb,EGR1,FOXO1,HIF1A,Hdac,JUN,NFKB1,NFKBIA,NFkB (complex),RELA,SMAD3,SP1,STAT1,STAT3,TNF,TP53,TP63,TP73,cisplatin,prostaglandin E2
mut vs wt d702factor 2x q05		TRAF2	-0.183	enzyme		0.268		-0.01	0.296	0.0251	CCR1,CXCL10,CXCL3,IL6,KLF2,NDRG1,PLBD1,TNFAIP3
mut vs wt d702factor 2x q05		HES1	0.233	transcription regulator		0.271		0.098	0.016	0.0148	ADAMTS5,CDKN1A,CHGA,IL6,SPP1,TPH1,WNT1
mut vs wt d702factor 2x q05		zoledronic acid		chemical drug		0.272		0.058	0.158	0.0294	IL6,TNFRSF11A,TNFSF10,VEGFA,WNT5A
mut vs wt d702factor 2x q05		STING1	-0.796	other		0.275		-0.196	0.802	0.00307	CGAS,CXCL10,CXCL2,GAS7,HOPX,IL1B,IL6,LCN2	2'3'-cyclic guanosine monophosphate-adenosine monophosphate,CXCL2,ERK,JUN,NFKB1,NFKBIA,NFkB (complex),PPARG,RELA,SMAD3,STAT1,STAT3,STING1,TP53
mut vs wt d702factor 2x q05		SAV1	0.009	other		0.277		0.196	-0.157	1.19e-05	CDKN1A,COL3A1,CXCL2,IL6,PITX2,SPP1,VIM	CTNNB1,JUN,MYC,NFkB (complex),NKX2-1,SAV1,STAT1,STAT3,STK3
mut vs wt d702factor 2x q05		C/EBP		group		0.277		-0.159	0.63	0.00451	ADH1C,CYP1A1,DIO2,IL6,LCN2,ONECUT1,TAT	C/EBP,CEBPA,CEBPB,FOS,JUN,NFkB (complex),PPARG
mut vs wt d702factor 2x q05		MAPK11	1.235	kinase		0.277		-0.142	0.592	0.00942	ACP5,CHGA,IL6,NPR1,VDR	CEBPB,FOS,JUN,JUND,MAPK11,MYC,NFkB (complex),P38 MAPK,SP1,STAT3,TP53,ZFP36
mut vs wt d702factor 2x q05		RARG	0.606	ligand-dependent nuclear receptor		0.282		-0.005	0.299	0.000111	ATP6V0A4,CNR1,CRABP2,CRYAB,FOXC1,GREB1,HOXA3,IGFBP6,IL6,NTN1,PITX2,POU5F1,ZFP42	CEBPB,CTNNB1,ESR2,FOS,FOXM1,JUN,JUND,MYC,NCOA2,NFkB (complex),POU5F1,PPARG,RARA,RARB,RARG,RXRA,SMAD4,SP1,STAT3,TCF,THRB,TP53,tretinoin
mut vs wt d702factor 2x q05		N-(3-oxododecanoyl)-homoserine lactone		chemical reagent		0.283		0	0.283	0.00233	CXCL2,CXCL6,IL1B,IL6	CEBPB,CXCL2,CXCL8,JUN,N-(3-oxododecanoyl)-homoserine lactone,NFKB1,NFKBIA,NFkB (complex),P38 MAPK,PPARG,RELA,STAT3,TNF,ZFP36
mut vs wt d702factor 2x q05		DCAF1	-0.021	kinase		0.283		0.136	0.014	0.0232	CDKN1A,CENPF,SOCS2,TNFSF10
mut vs wt d702factor 2x q05		RUNX2	0.757	transcription regulator		0.285		-0.097	0.613	0.00265	ACTA2,ADAMTS5,CDH2,CDKN1A,DPYSL3,HAPLN1,LEF1,PCDH18,RGCC,SNAI2,SOX5,SPP1,VEGFA	AHR,AR,Akt,BRCA1,EGR1,ESR2,FOXO1,LEF1,NFKB1,NFkB (complex),NOTCH1,PTK2,RBPJ,RUNX2,SMAD3,SMAD4,SMAD7,SP1,STAT3,TP53
mut vs wt d702factor 2x q05		RUNX1	0.067	transcription regulator		0.288		-0.065	0.51	0.0208	CDKN1A,CDKN1C,DEPTOR,GNA15,HAPLN1,IGFBP3,IL1B,ITGA4,ITGA9,ITGB2,KLF2,RGCC,S100A9,SLC22A4,SOX5,SPP1,UNC5B,VEGFA
mut vs wt d702factor 2x q05		CD9	0.464	other		0.289		-0.022	0.337	0.00435	CCN4,ITGA5,VEGFA,WNT1,WNT5A	CD9,CTNNB1,Creb,FOS,FOXO3,HIF1A,ITGB1,JUN,STAT1,STAT3,TGFA
mut vs wt d702factor 2x q05		OTX2	-0.226	transcription regulator		0.29		-0.148	0.701	0.00623	COL8A1,GPNMB,OCA2,PRDM1,PTPRZ1,TF,TNC,WNT1
mut vs wt d702factor 2x q05		anisomycin		chemical - endogenous non-mammalian		0.294		-0.071	0.465	0.00218	ABCG2,CDKN1A,CYP1A1,GJA1,IL6,PLAUR,SPP1,VEGFA	CEBPB,Creb,EGR1,ERK1/2,FOS,FOSL1,HDAC1,JUN,MAPK14,MYC,Mapk,NFE2L2,NFKB1,NFkB (complex),P38 MAPK,SP1,STAT3,TP53,TP73,ZFP36,anisomycin
mut vs wt d702factor 2x q05		filgrastim		biologic drug		0.3		0.047	0.044	0.00859	ALOX5,ANXA1,ATP12A,BATF,CCR3,CXCL10,CYP1B1,DPYSL3,EMILIN2,F5,GPR171,GRP,HPGD,IL1RAP,ITGA4,ITGB7,LDHA,LEF1,MEF2C,MGAM,NMNAT2,NRGN,PCSK9,PDE4B,PLAUR,SPP1,SULF2,TUBB1,VIM,ZNF395
mut vs wt d702factor 2x q05		SMAD1	-0.817	transcription regulator		0.311		-0.165	0.739	0.000655	ACTA2,CDKN1A,COCH,COL2A1,CXCL2,CXCL3,SPP1,VEGFA	AR,CEBPB,EGR1,EP300,HDAC1,HIF1A,JUN,LEF1,MYC,MYOCD,NFKB1,NFkB (complex),NOTCH1,P38 MAPK,RBPJ,RUNX2,SMAD1,SMAD3,SP1,STAT3,TP53,ZFP36
mut vs wt d702factor 2x q05		mitomycin C		chemical drug		0.311		-0.147	0.633	0.0451	CDKN1A,NQO1,POU5F1,TYMP,VEGFA,ZMAT3
mut vs wt d702factor 2x q05		RGCC	1.606	other		0.314		-0.112	0.561	0.000202	ACTA2,CDH2,IL1B,SCD,SNAI2	AHR,NFkB (complex),RGCC,SMAD3,SMAD4,SMAD7,STAT3
mut vs wt d702factor 2x q05		advanced glycation end-products		chemical - endogenous mammalian		0.314		-0.104	0.542	0.00048	CDKN1A,CLDN5,GJA1,IL6,KLF2,LRP2,SLIT2,SPP1	CEBPB,CTNNB1,Creb,EGR1,ERK1/2,FOS,FOSL1,FOXO1,JUN,MMP9,Mapk,NFATC1,NFE2L2,NFKB1,NFKBIA,NFkB (complex),PPARG,PPARGC1A,RELA,SIRT1,SP1,STAT3,TNF,advanced glycation end-products
mut vs wt d702factor 2x q05		HSPB1	-0.216	other		0.315		0.026	0.254	0.000811	ACTA2,CDKN1A,CXCL2,CXCL3,IL1B,IL6	CEBPB,Creb,EGR1,ERK1/2,FOS,Gm21596/Hmgb1,HSPB1,JUN,JUND,MYC,NFATC2,NFE2L2,NFKB1,NFKBIA,NFkB (complex),P38 MAPK,PARP1,PRKD1,SP1,STAT3,TP53,ZFP36
mut vs wt d702factor 2x q05		EZH2	-0.451	transcription regulator		0.323		0.013	0.26	8.7e-06	C4BPB,CCND2,CD70,CDH2,CDKN1A,CDKN1C,CER1,CHRM3,CNR1,COL5A1,CXCL10,CXCL2,CYB5R2,CYP1B1,EPDR1,FBLN1,FOXF2,FRZB,IGFBP3,IL6,KLF2,LCN2,NCOA7,NDRG1,NES,ONECUT1,PITX2,PRDM1,PTN,S100A9,SAA1,SAA2,SFRP4,TBX1,VDR,VEGFA,WNT1	CTNNB1,DNMT1,DNMT3B,EZH2,HDAC1,Histone h3,JUN,KMT2A,MED1,MYC,NFKB1,NFkB (complex),POU5F1,RELA,RNA polymerase II,SP1,STAT1,STAT3,TP53
mut vs wt d702factor 2x q05		IGF2	-1.238	growth factor		0.323		-0.076	0.556	0.00099	APOA2,CDKN1A,CTSV,CYP1B1,H19,IFITM2,IGFBP3,IGFBP6,IL6,ITGA5,MMP10,NDRG1,PRDM16,SFTPC,SPP1,TAT,VEGFA	CHUK,Creb,EGR1,ERK1/2,FOS,FOSL1,HIF1A,IGF2,JUN,JUND,MYC,Mapk,NFE2L2,NFKB1,NFKBIA,NFkB (complex),RELA,SMAD3,SP1,SRC,TP53
mut vs wt d702factor 2x q05		ST8SIA1	-0.032	enzyme		0.339		0.047	0.248	0.011	CDKN1A,IL1B,NES,POU5F1
mut vs wt d702factor 2x q05		N-[N-(3,5-difluorophenacetyl-L-Ala)]-S-phenylglycine t-butyl ester		chemical - protease inhibitor		0.339		0.127	0.089	0.0117	ACTA2,IL1B,IL6,IVL,SIM2,VEGFA
mut vs wt d702factor 2x q05		thymoquinone		chemical drug		0.339		-0.006	0.352	0.0417	AR,CASP1,CDKN1A,COL3A1,TNFSF10
mut vs wt d702factor 2x q05		etanercept		biologic drug		0.339		0.11	0.123	0.0458	CXCL10,CXCL13,IL1B,IL6
mut vs wt d702factor 2x q05		Pkc(s)		group		0.354		-0.113	0.803	7.63e-05	ACTA2,APLN,BDNF,CDKN1A,COL3A1,CYP1A1,CYP2A6 (includes others),FGFBP1,GSTA2,HPGD,IL1B,IL6,ITGA5,IVL,KCNJ2,NQO1,SPP1,STC1,STC2,TNFRSF11A,ULBP2,VDR,VEGFA	CEBPB,CTNNB1,Ca2+,Creb,FOS,FOSL1,JUN,MAPK14,Mapk,NFE2L2,NFKB1,NFKBIA,NFkB (complex),P38 MAPK,Pkc(s),SP1,STAT3,TP53,TP73,ZFP36,tetradecanoylphorbol acetate
mut vs wt d702factor 2x q05		Ca2+		chemical - endogenous mammalian		0.358		-0.107	0.93	5.34e-07	ACTA2,ANKH,AR,BDNF,CCND2,CDKN1A,COL2A1,CYP1A1,CYP1B1,ENPP1,FLG,GJA1,GUCY1A2,IL1B,IL6,IVL,KCND2,NDRG1,NR5A1,S100A9,SCGB1A1,SERPINB2,SNAI2,SP4,SPP1,SSTR2,STC1,SYT4,TRPV6,VDR,VEGFA	AHR,CEBPB,Ca2+,Creb,DDIT3,EGR1,EP300,ESR1,FOS,HDAC1,JUN,JUND,MAPK13,MYC,NFAT5,NFE2L2,NFkB (complex),P38 MAPK,Pkc(s),SMAD3,SP1,STAT3,TP53,ZFP36
mut vs wt d702factor 2x q05		MDM2	0.385	transcription regulator		0.362		-0.009	0.39	0.00638	ADIRF,CDKN1A,H2AC18/H2AC19,IGFBP6,IL13RA2,INHBB,MYCN,SNAI2,TNFSF10	AR,CTNNB1,EP300,HIF1A,Hdac,JUN,MDM2,MYC,NFkB (complex),RARA,RXRA,SMAD2,SMAD3,SMAD4,SP1,STAT3,TP53,TP63,TP73
mut vs wt d702factor 2x q05		captopril		chemical drug		0.365		-0.046	0.518	0.000407	ABCC2,ANXA1,BGN,CP,EFEMP2,GPX2,IGFBP6,IL6,LCN2,SLC34A2,SPP1	AGT,AKT1,CEBPB,FOXO3,NFKB1,NFKBIA,NFkB (complex),SMAD3,SP1,TP53,captopril
mut vs wt d702factor 2x q05		IL12 (complex)		complex		0.37		-0.127	0.816	0.0168	CASP1,CXCL10,CXCL6,FLT4,GJA1,HLX,IDO2,IL1B,IL6,ITGA4,ITGB2,PRDM1,SOCS2,TACR1,VEGFA,XCL1
mut vs wt d702factor 2x q05		ADCY		group		0.378		-0.084	0.6	4.59e-05	CDH2,CDKN1A,COL3A1,CYP1B1,GJA1,IL1B,IL6	ADCY,Akt,CEBPB,CREBBP,CTNNB1,Creb,EGR1,ERK,ERK1/2,ESR2,FOS,FOXO1,JUN,NCOA2,NFKB1,NFkB (complex),PPARG,RELA,SMAD3,SP1,STAT3,TP53,cyclic AMP
mut vs wt d702factor 2x q05		miR-450a-5p (and other miRNAs w/seed UUUGCGA)		mature microrna		0.378		0.196	-0.14	0.000708	COL3A1,EMP3,ITGA5,SNAI2,SPP1,SYDE1,VIM
mut vs wt d702factor 2x q05		CUL3	0.169	enzyme		0.378		0.039	0.274	0.00699	COL2A1,FBXO32,HAPLN1,IL6,MFAP4,NQO1,S100A9	CUL3,NFE2L2,NFKB1,NFkB (complex),RELA,SQSTM1,STAT3
mut vs wt d702factor 2x q05		methylmercury		chemical toxicant		0.378		-0.027	0.45	0.022	ACVR1C,COL3A1,CYP1A1,IGFBP3,IL6,PROC,PTH1R
mut vs wt d702factor 2x q05		SCX	0.282	transcription regulator		0.391		0.078	0.217	0.0016	HAPLN1,SNAI2,SOX5,SPP1,TNC
mut vs wt d702factor 2x q05		IL27RA	-0.274	transmembrane receptor		0.391		0.113	0.141	0.0196	CXCL10,CXCL13,IL1B,IL6,PRDM1
mut vs wt d702factor 2x q05		COMMD3-BMI1	-0.053	transcription regulator		0.391		0.108	0.152	0.0384	HOXA3,IL6,LCN2,LEF1,WNT5A
mut vs wt d702factor 2x q05		MASTL	-0.525	kinase		0.391		-0.17	0.767	0.0452	ARHGDIB,CYP1B1,KYNU,PAPPA,SLC2A3
mut vs wt d702factor 2x q05		TET3	-0.345	enzyme		0.391		-0.11	0.606	0.0458	APLN,LRP2,SFRP4,TNNT2
mut vs wt d702factor 2x q05		losartan potassium		chemical drug		0.398		0.123	-0.04	0.000388	AGTR1,COL3A1,CXCL10,CXCL3,GJA1,HAVCR1,IL1B,IL6,NPR1,PDE3A,PLCB1,PTH1R,SPP1,VEGFA	AGT,CEBPB,CTNNB1,Creb,EGR1,ERK1/2,FOS,GJA1,JUN,MYC,NFKB1,NFKBIA,NFkB (complex),P38 MAPK,SMAD3,SP1,STAT1,STAT3,TP53,ZFP36,losartan potassium
mut vs wt d702factor 2x q05		colchicine		chemical drug		0.403		-0.063	0.565	0.00218	ABCC2,ACTA2,BDNF,CYP2B6,IL1B,NQO1,TAT,TUBB1	AHR,CASP1,CEBPB,IL1,IL1B,IL1RN,JUN,JUNB,NFKB1,NFKBIA,NFkB (complex),PYCARD,RELA,STAT3,TNF,TP53,colchicine
mut vs wt d702factor 2x q05		SP3	-0.255	transcription regulator		0.403		-0.101	0.647	0.0231	ACTA2,ADCY4,AHRR,ALOX15B,CDH2,CDKN1A,COL2A1,IGFBP3,KDR,MYCN,NES,PLAUR,SLC2A3,TNC,VEGFA,VIM
mut vs wt d702factor 2x q05		SMAD3	-0.041	transcription regulator		0.408		-0.103	0.905	8.17e-08	ACTA2,APOA2,APOB,BGN,CCND2,CDH2,CDKN1A,COL2A1,COL3A1,CRP,CXCL10,CXCL3,CYP1A1,DEPTOR,FBN2,FST,IL1B,IL6,INHA,INPP5D,LEFTY1,NR5A1,PNMT,POU5F1,PTX3,SLC51B,SNAI2,SPP1,SSTR2,TF,TNC,VEGFA,VIM	Akt,CTNNB1,EGR1,FOXO1,HIF1A,NFKB1,NFkB (complex),RELA,SMAD1,SMAD2,SMAD3,SMAD4,SMAD7,SP1,STAT3,TGFB1,TP53,Tgf beta
mut vs wt d702factor 2x q05		AKT1	-0.133	kinase		0.414		-0.085	0.8	3.53e-05	ACTA2,AKR1B10,AKR1C1/AKR1C2,ANKH,AR,CCND2,CDKN1A,COL8A1,CTSV,CXCL10,CXCL2,CXCL6,CXCR6,FBXO32,FSTL1,HUNK,IL6,KDR,LCN2,NQO1,SCD,SEMA6D,SLC2A1,SNAI2,SPP1,TNFSF10,UNC5B,VEGFA,VIM	AKT1,Akt,CTNNB1,EGR1,FOXO1,FOXO3,HIF1A,JUN,LEP,MYC,NFKB1,NFKBIA,NFkB (complex),NKX3-1,PPARG,PTEN,RELA,SMAD3,SP1,STAT3,TP53
mut vs wt d702factor 2x q05		tacrolimus		chemical drug		0.415		0.065	0.182	0.000189	APOD,BATF,CCR3,CD200,CFP,COL2A1,COL3A1,CXCL10,CXCL2,DPYSL3,F5,GPRC5B,IL1B,ITGB7,NT5E,PDE3B,PDLIM4,SLIT2,SPP1,TIAM1,TMEFF1,TNC,TNFSF10,XCL1	AHR,Akt,CTNNB1,EGR1,FOXO1,FOXO3,IL2,JUN,NFKB1,NFKBIA,NFkB (complex),PPARG,RELA,SMAD3,SP1,STAT1,STAT3,TP53,dexamethasone,tacrolimus
mut vs wt d702factor 2x q05		NFATC4	-0.204	transcription regulator		0.422		-0.122	0.661	0.00244	B3GAT1,BDNF,COL3A1,KCND2,NPPB,SPP1
mut vs wt d702factor 2x q05		mir-26		microrna		0.425		0.147	0.1	0.00301	CCND2,CXCL3,FGF9,HPGD,IL6	Akt,EGR1,FOXO1,NFKB1,SMAD3,SP1,mir-26
mut vs wt d702factor 2x q05		POR	0.254	enzyme		0.426		0.072	0.21	0.0466	APCDD1,CYP1A1,CYP1A2,CYP2A6 (includes others),CYP2B6,FOXC1,GREB1,KDR,PDK4,SCD,TMEM229B,TUBB2B,VEGFA
mut vs wt d702factor 2x q05		ethionine		chemical toxicant		0.431		-0.146	0.84	0.000201	ANXA1,CP,GPNMB,GPX2,LCN2,PLA1A,SLC34A2,SPP1
mut vs wt d702factor 2x q05		ACSL4	-0.283	enzyme		0.431		-0.056	0.588	0.00245	AR,ENPP1,FAH,MAPK11,NT5E,SPP1,WT1,XIST
mut vs wt d702factor 2x q05		PITX2	-1.017	transcription regulator		0.433		-0.114	0.838	0.000147	ADH1C,CCND2,CDH2,COL8A1,FOXC1,HPGD,LDHA,LEF1,LMX1B,NR5A1,PITX1,PITX2,PLOD2,TBX1,VIM,WNT5A	CTNNB1,FOXM1,HDAC3,JUN,NFkB (complex),PITX2,PPARG,RELA,SMAD4,STAT3,TBX1,TCF,THRB,WDR5
mut vs wt d702factor 2x q05		NRAS	-0.222	enzyme		0.437		0.075	0.17	0.00235	ADCY2,AK1,CDKN1A,CRABP2,CXCL2,GJA1,IL1B,IL6,KDR,LCN2,NPR3,NQO1,PLTP,PON3,PTX3,SLC2A1,SV2B,VEGFA	AKT1,CEBPB,CTNNB1,Creb,ERK,FOXO1,FOXO3,MMP9,NFKB1,NFKBIA,NFkB (complex),NRAS,PI3K (complex),PPARG,RELA,SMAD3,SP1,STAT3,TP53
mut vs wt d702factor 2x q05		parthenolide		chemical drug		0.447		0.104	0.22	2.39e-05	ADAMTS5,CASP1,CLDN5,CXCL2,IL1B,IL6,LEF1,PDK4,WNT1	AHR,CASP1,CTNNB1,JUNB,NFKB1,NFKBIA,NFkB (complex),NOD2,NR1H3,PPARD,PPARG,PYCARD,RELA,RXRA,SMAD3,STAT3,TP53,parthenolide
mut vs wt d702factor 2x q05		Wnt		group		0.447		-0.104	0.679	0.000655	ADAMTS5,CD24,CDH2,KDR,LEF1,PITX2,SIX1,TFAP2A	CTNNB1,FOXM1,JUN,SMAD4,STAT3,TCF,Wnt
mut vs wt d702factor 2x q05		SB 290157		chemical reagent		0.447		0.06	0.314	0.00301	CXCL2,CXCL3,IL1B,IL6,SPP1	CEBPB,Ccl2,Creb,IL4,JUN,NFKBIA,NFkB (complex),P38 MAPK,RELA,SB 290157,SP1,STAT3,TNF,TP53,ZFP36,prostaglandin E2
mut vs wt d702factor 2x q05		immethridine		chemical reagent		0.447		0.196	0.009	0.00435	CNR1,CXCL3,IL6,LCN2,SPP1
mut vs wt d702factor 2x q05		JAK inhibitor I		chemical - kinase inhibitor		0.447		0.14	0.135	0.00605	CCND2,CXCL10,CXCL2,CXCL3,CXCL6	CTNNB1,Creb,IKBKE,JAK inhibitor I,JAK2,JUN,MYC,NFKB1,NFKBIA,NFkB (complex),PPARG,RELA,SMAD3,STAT1,STAT3
mut vs wt d702factor 2x q05		TNFSF11	0.736	cytokine		0.448		-0.155	1.151	0.00133	ACP5,AHRR,BST1,CCR1,CDKN1A,CKB,CXCL3,CYP1A1,CYP1A2,FRRS1,GLRX,IL1B,IL6,ITGA5,PLAUR,PRDM1,SAA1,SAA2,SLC2A1,SPP1,SRXN1,TNFRSF11A,TSPAN5	AHR,CEBPB,FOS,FOXO3,HIF1A,IL1B,IL2,IL6,JUN,MYC,NFKB1,NFKBIA,NFkB (complex),RELA,SP1,SRC,STAT1,STAT3,TNFSF11,VTN
mut vs wt d702factor 2x q05		mir-135		microrna		0.451		0.182	0.051	0.00818	AR,CASP1,CDH2,IL1B,SPP1
mut vs wt d702factor 2x q05		ITGB3	0.24	transmembrane receptor		0.451		-0.068	0.6	0.0314	CD274,IL1B,ITGA5,KDR,NPPB,PLAUR,SNAI2
mut vs wt d702factor 2x q05		carboplatin		chemical drug		0.456		-0.122	0.866	2.72e-06	ABCC2,CD274,CP,GPNMB,GPX2,LCN2,NT5E,PLA1A,POU5F1,SLC34A2,SPP1,VIM	Akt,EGR1,FOXO1,NFKB1,SMAD3,SP1,carboplatin
mut vs wt d702factor 2x q05		mir-10		microrna		0.46		0.15	0.017	0.00639	ACVR1C,ALDH1A3,ALOX5,ANKH,AR,GJA1,IL6,PRDM1,SMO,VEGFA,WT1	AR,BRCA1,CTNNB1,Creb,EGFR,EGR1,ERK1/2,ESR1,FOS,HDAC1,HIF1A,JUN,MYC,NFKB1,NFkB (complex),RELA,SNAI2,SP1,STAT1,STAT3,TP53,mir-10
mut vs wt d702factor 2x q05		vorinostat		chemical drug		0.464		-0.009	0.503	0.0151	ADAMTS1,APLP1,APOB,AR,CASP1,CCND2,CCR1,CCR3,CDH2,CDKN1A,HPGD,IL1B,IL6,LGI1,LIPG,NDRG1,S100A9,SEMA3A,TNFSF10,VIM
mut vs wt d702factor 2x q05		MECP2	-0.121	transcription regulator		0.466		-0.027	0.529	0.00863	ANXA1,BDNF,IGFBP3,SCN3A,SEMA3D,SLC2A3,SYN3,SYT4,TIAM1,UNC5C,VEGFA,VIM	CREB1,CTNNB1,GJA1,HIF1A,IGF1,JUN,MECP2,NFkB (complex),NTRK2,SMAD3,SP1,STAT3,TP53
mut vs wt d702factor 2x q05		SPI1	-0.955	transcription regulator		0.466		-0.084	0.76	0.0318	ACTA2,BCL11A,CCND2,CDKN1A,CXCL10,FES,IFITM1,IL1B,ITGA4,ITGA5,ITGB2,LEF1,MEF2C,MT1F,PRDM1,SPP1,TFEC,TNFSF10,VIM
mut vs wt d702factor 2x q05		TNFRSF1A	-0.057	transmembrane receptor		0.468		-0.046	0.639	0.00157	APCS,BDNF,CDH2,CDKN1A,CXCL10,CXCL13,CXCL2,CXCL3,DIO2,IL1B,IL6,KDR,LCN2,NQO1,SAA1,VEGFA	AHR,CEBPB,CHUK,IL1B,IL6,JUN,NFKB1,NFKBIA,NFkB (complex),PPARG,RELA,SMAD3,STAT3,TNF,TNFRSF1A
mut vs wt d702factor 2x q05		STK4	-0.161	kinase		0.469		-0.104	0.647	0.0177	IL1B,IL6,PDPN,SFTPC
mut vs wt d702factor 2x q05		GSK3B	-0.018	kinase		0.472		0.011	0.441	0.0153	AR,CDKN1A,CXCL6,IL1B,IL6,KDR,LCN2,SNAI2,SPP1,TET1,TNFSF10
mut vs wt d702factor 2x q05		DACH1	-0.9	transcription regulator		0.478		0.09	0.242	0.000242	CDKN1A,CXCL3,IGFBP3,IL6,MEF2C,POU5F1,STC2,TNFAIP3	AR,BRCA1,CEBPB,CXCL2,DACH1,ESR2,IL6,JUN,NFKBIA,NFkB (complex),RELA,SMAD3,SP1,STAT3,TP53
mut vs wt d702factor 2x q05		TAB1	-0.041	enzyme		0.478		0.086	0.253	0.000331	CDKN1A,CH25H,CXCL10,IL1B,IL6,SAA1,TNFSF10	CEBPB,CHUK,IKBKB,IKBKG,MAP3K7,NFE2L2,NFKB1,NFKBIA,NFkB (complex),RELA,SMAD3,STAT1,STAT3,TAB1,TP63
mut vs wt d702factor 2x q05		mocetinostat		chemical drug		0.485		0	0.485	1.32e-05	BDNF,CXCL10,IL1B,MAGEA3/MAGEA6,NOVA1,UNC5C	CTNNB1,HDAC1,Hdac,Histone h3,Histone h4,KMT2A,MED1,NFKB1,NFkB (complex),RELA,RNA polymerase II,SP1,TP53,mocetinostat
mut vs wt d702factor 2x q05		mir-30 (includes others)		microrna		0.488		0.176	0.075	0.00211	AR,CDKN1A,IL1B,IL6,PRDM1,UGT8,VIM	CEBPB,HDAC1,IL6,JUN,MYC,NFKB1,NFKBIA,NFkB (complex),P38 MAPK,PPARG,RELA,SP1,STAT3,TNF,TP53,ZFP36,mir-30 (includes others)
mut vs wt d702factor 2x q05		AXL	-0.593	kinase		0.49		0.017	0.453	0.0157	CDH2,IL1B,IL6,SNAI2,VIM
mut vs wt d702factor 2x q05		troglitazone		chemical drug		0.492		-0.018	0.582	4.34e-06	ABCA12,ABCG2,ACTA2,AGTR1,AR,CCND2,CDKN1A,CEACAM5,CHCHD10,CRYAB,CXCL10,CXCL3,CXCL6,CYP1A1,CYP2B6,CYP2B7P,DCN,EGLN3,ENO2,ERO1A,HUNK,IL13RA2,IL1B,IL6,NDRG1,NNMT,NRAD1,P4HA1,PDE3B,PDK4,SCD,SLC2A1,SLC2A2,SPP1,UGT1A1,VEGFA,WT1	AHR,AR,Akt,EGR1,FOXO1,IL1B,JUN,NFKB1,NFKBIA,NFkB (complex),PPARG,RELA,RXRA,SIRT1,SMAD3,SP1,STAT3,troglitazone
mut vs wt d702factor 2x q05		NS-398		chemical reagent		0.498		0.123	0.135	0.00384	CDKN1A,CHGA,HAPLN1,IL1B,IL6,S100A9,SAA1,SAA2,SERPINB2,SPP1,VEGFA	CREBBP,CTNNB1,Creb,ESR2,IL10,JUN,NCOA2,NFKB1,NFKBIA,NFkB (complex),NS-398,PPARG,PTGS2,RELA,STAT3,TP53,prostaglandin E2
mut vs wt d702factor 2x q05		cerivastatin		chemical drug		0.503		0.018	0.457	0.000407	CD70,CDKN1A,CYP1B1,CYP2B6,IL6,ITGB2,KLF2,PCSK9,PLAUR,S100A9,VEGFA	CD40LG,CEBPB,CTNNB1,Ca2+,Creb,F2,JUN,NFKB1,NFKBIA,NFkB (complex),P38 MAPK,SP1,STAT3,TNF,TP53,ZFP36,cerivastatin
mut vs wt d702factor 2x q05		dinoprost		chemical - endogenous mammalian		0.509		-0.073	0.684	0.0167	AKR1C1/AKR1C2,ANGPTL3,CCND2,IL1B,IL6,PTX3,SPP1,VEGFA
mut vs wt d702factor 2x q05		COLQ	0.292	other		0.513		-0.022	0.58	0.000151	ADAMTS5,BDNF,BGN,COL2A1,COL8A1,DCN,LARGE1,LRP4,MFAP2,MUSK,NID2
mut vs wt d702factor 2x q05		FOXO1	0.614	transcription regulator		0.515		-0.097	1.025	2.13e-05	ACSL5,ALDOB,APLN,AR,CD70,CDKN1A,CDKN1C,CENPF,CH25H,CLDN5,CNR1,COL2A1,CTSV,CXCL10,DIO2,FBXO32,FLT4,FMOD,FOXC1,FST,HAL,IGFBP7,IL1B,IL6,ITGB2,KLF2,MYCN,PDK4,POU5F1,PRDM1,PTPRB,RIPOR2,SCD,SEMA6D,SERPINB2,SLC2A2,SOX5,TAT,TNFRSF11A,TNFSF10	AKT1,Akt,CEBPB,EGR1,FOXO1,FOXO3,HDAC1,HIF1A,Histone h3,JUN,KMT2A,MED1,NFKB1,NFkB (complex),PPARG,PPARGC1A,RELA,RNA polymerase II,RXRA,SIRT1,SMAD3,SP1,STAT3,TP53
mut vs wt d702factor 2x q05		PGR	0.368	ligand-dependent nuclear receptor		0.515		-0.101	0.998	0.000263	ABCG2,ACP5,ADAMTS1,AKR1C3,ALDH1A3,AR,CDKN1A,CDKN1C,CYRIA,FOXC1,GAS6,GREB1,H19,HPGD,KLF11,MX2,MYCN,NDRG1,PNMT,SERPINA5,SLC31A2,SNAP25,STC1,TAT,TM4SF1,TNC,VDR	AR,CRH,Creb,EGR1,ERK1/2,ESR1,ESR2,FOS,JUN,JUNB,NFKB1,NFkB (complex),NR1I2,PGR,PPARG,PRL,SP1,STAT3,STAT5B,TP53,mifepristone,progesterone
mut vs wt d702factor 2x q05		decitabine		chemical drug		0.52		-0.075	1.169	1.47e-14	ABCC2,ADAM23,ADAMTS1,ADAMTS9-AS2,ALOX5,AR,ARHGDIB,BCL11A,BDNF,BMP5,CA9,CADM1,CCND2,CCR3,CDA,CDH2,CDKN1A,CDKN1C,CGREF1,CLDN5,COL3A1,CRABP2,CXCL10,CXCL3,CYP1A1,CYP1B1,CYP2A6 (includes others),CYP4B1,DIRAS3,DMBT1,EDA2R,FBN2,FES,FLG,FLNC,FOXC1,FOXE1,FOXF2,GLI3,GLRX,H19,HPGD,IFITM1,IGFBP3,IGFBP7,IL1B,IL1RAP,IL6,INPP5F,ITGA4,LEF1,LOX,MAGEA2/MAGEA2B,MAGEA3/MAGEA6,MAGEA4,MAPK12,METRN,MSI1,NDRG1,NEFL,NQO1…	Akt,CEBPB,CTNNB1,EGR1,EP300,FOXO1,HDAC1,JUN,MYC,NFKB1,NFKBIA,NFkB (complex),SMAD3,SP1,STAT3,TNF,TP53,decitabine
mut vs wt d702factor 2x q05		CXCL8	-0.932	cytokine		0.52		-0.086	0.773	0.000632	ABCG2,ANXA1,AR,CXCL2,CXCL3,IL1B,ITGA5,ITGB2,MAPK12,POU5F1,SNAI2	AHR,CREB1,CTNNB1,CXCL8,EGFR,FN1,HIF1A,ICAM1,JUN,NFKB1,NFKBIA,NFkB (complex),NKX3-1,NOTCH1,PTEN,RELA,SMAD3,SP1,STAT3,TP53
mut vs wt d702factor 2x q05		SERPINE2	0.583	other		0.522		0.152	0.125	0.000201	BDNF,CXCL10,CXCL13,CXCL3,GLI3,IL1B,IL6,ITGB2	AHR,CTNNB1,F2,JUN,NFKB1,NFKBIA,NFkB (complex),PLAU,RELA,SERPINE2,SMAD3,SP1,STAT1,STAT3,STAT4,TP53
mut vs wt d702factor 2x q05		JAG1	-0.159	growth factor		0.522		-0.152	0.92	0.00855	ACTA2,CCND2,CDKN1A,SNAI2,SPP1,TNC,VIM	Akt,Creb,EGFR,EGR1,ERK1/2,FOS,FOXO1,HIF1A,JAG1,JUN,LEF1,NFKB1,NOTCH1,NOTCH3,RBPJ,RELA,RUNX2,SMAD3,SP1,STAT3
mut vs wt d702factor 2x q05		PRKN	-0.94	enzyme		0.526		0.065	0.382	0.0242	ACTA2,IL1B,IL6,KDR,LEF1
mut vs wt d702factor 2x q05		PD 123319		chemical drug		0.528		0.03	0.469	0.00706	CD24,KDR,SPP1,VEGFA,WNT11	AGT,NFKB1,NFKBIA,NFkB (complex),NR3C2,PD 123319,PPARG,RELA,SMAD3,STAT3,TP53,aldosterone
mut vs wt d702factor 2x q05		NANOG	-0.239	transcription regulator		0.532		-0.059	0.675	0.00349	CCND2,COL3A1,HOPX,KDR,LEFTY1,MS4A15,MYCN,ONECUT1,POU5F1,RIPPLY3,TET1,VIT,ZFP42	Akt,CTNNB1,EGR1,FOXO1,GLI1,NANOG,NFKB1,SMAD3,SP1,TP53
mut vs wt d702factor 2x q05		sunitinib		chemical drug		0.535		0.088	0.231	1.21e-05	CCND2,CDKN1A,COL5A1,COL8A1,CXCL10,CXCL3,CYP1A1,ITGA4,ITGA8,ITGB2,KDR,TNC	Akt,CTNNB1,Creb,EGR1,ERK,ERK1/2,FOS,FOXO1,JAK2,JUN,MYC,NFKB1,NFKBIA,NFkB (complex),PPARG,RELA,SMAD3,SP1,STAT1,STAT3,sunitinib
mut vs wt d702factor 2x q05		1,25-dihydroxyvitamin D		chemical drug		0.536		-0.01	0.557	0.0267	CCND2,FST,IL6,MAPK12,VDR
mut vs wt d702factor 2x q05		mir-31		microrna		0.537		0.166	0.171	0.00818	AR,EGLN3,ITGA5,SPP1,TIAM1
mut vs wt d702factor 2x q05		aldosterone		chemical - endogenous mammalian		0.538		-0.143	1.011	0.00739	ADAMTS1,APLN,ATP6V0A4,BDNF,COL3A1,IL6,KCNMA1,KDR,LCN2,LOX,PLAUR,RIPOR2,SPP1,TAT	AGT,AHR,CEBPB,Creb,EGR1,ERK1/2,ESR1,FOS,IL6,JUN,JUND,NFKB1,NFKBIA,NFkB (complex),NR3C2,NRIP1,Pkc(s),RELA,SMAD3,SP1,STAT3,TP53,aldosterone
mut vs wt d702factor 2x q05		phytohemagglutinin		chemical drug		0.538		-0.182	1.321	0.0372	CACNB3,CCND2,CHN1,CLIC2,CPS1,CXCL10,HPGD,IL1B,IL6,ITGA8,KLF2,MEIS2,NT5E,SERPINA5,SLC2A2,SLC6A8,SPP1,TNFSF10,VIPR1,XCL1
mut vs wt d702factor 2x q05		ITGB2	2.075	transmembrane receptor		0.547		-0.018	0.593	0.00401	ACTA2,CXCL10,CXCL2,CXCL3,IL6,ITGA4,VEGFA	AHR,CCN1,CEBPB,CREB1,CTNNB1,FN1,ICAM1,ITGB2,JUN,NFKB1,NFKBIA,NFkB (complex),NOTCH1,P38 MAPK,RELA,SMAD3,SP1,STAT3,ZFP36
mut vs wt d702factor 2x q05		SAA1	3.124	transporter		0.548		-0.113	0.819	0.00508	BGN,CXCL10,CXCL6,IL1B,IL6,S100A9	AHR,CEBPB,Creb,EGR1,ERK1/2,FOS,IL1B,IL6,JUN,NFKB1,NFKBIA,NFkB (complex),P38 MAPK,RELA,SAA1,SP1,STAT3,TP53,ZFP36
mut vs wt d702factor 2x q05		cephaloridine		chemical drug		0.552		-0.117	0.92	0.0103	ABCC2,AKR1B10,ATP12A,CXCL10,CXCL13,CYP1B1,FOXE1,GPNMB,NQO1,TPH1
mut vs wt d702factor 2x q05		KDM2B	-0.364	enzyme		0.555		0.078	0.381	0.000993	BDNF,CD24,CDKN1A,COL2A1,CRABP2,CXCL10,XIST	Histone h3,KDM2B,KMT2A,MED1,RELA,RNA polymerase II,SP1
mut vs wt d702factor 2x q05		green tea polyphenol		chemical drug		0.555		0.049	0.446	0.00286	ANXA1,CDKN1A,IGFBP3,IL1B,IL6,VEGFA	AHR,Creb,EGR1,ERK1/2,ESR1,FOS,FOSL1,HDAC1,JUN,JUND,MYC,Mapk,NFE2L2,NFKB1,NFkB (complex),PPARG,Pkc(s),RELA,RXRA,SP1,STAT3,TP53,green tea polyphenol
mut vs wt d702factor 2x q05		potassium chloride		chemical drug		0.555		-0.129	0.84	0.0373	BDNF,COL3A1,FGF9,IL1B,MEF2C,SPP1,SYT4,TRPV6,UNC5B
mut vs wt d702factor 2x q05		NCOA2	-0.143	transcription regulator		0.557		-0.114	0.909	0.00276	AR,CDKN1A,CXCL10,CYP1A1,CYP2B6,FRZB,FST,IL1B,IL6,LIPG,PLTP,SLC2A2	Ahr-aryl hydrocarbon-Arnt,CEBPB,ESR1,FOS,HDAC3,JUN,NCOA2,NFKBIA,NFkB (complex),NR5A2,NRIP1,PPARG,PPARGC1A,RARA,RARB,RXRA,SMAD3,SREBF1,STAT1,STAT3,THRB,TNF,estrogen receptor
mut vs wt d702factor 2x q05		FST	1.212	other		0.56		-0.036	0.664	0.00208	APOA2,CPS1,FST,IL6,INHBB,LEFTY1,POU5F1,PRDM16,SAA1	AHR,CEBPB,CREB1,CTNNB1,EGR1,FSH,FST,INHBA,JUN,NFkB (complex),P38 MAPK,SMAD2,SMAD3,SMAD4,SMAD7,STAT3,ZFP36
mut vs wt d702factor 2x q05		roscovitine		chemical drug		0.562		0.123	0.291	0.0489	AR,CDKN1A,CYP2B6,UGT1A1,ULBP2
mut vs wt d702factor 2x q05		mir-210		microrna		0.563		0.175	0.07	0.0499	BDNF,CDH2,HOXA3,INHBB,KDR,MDGA1,NDRG1,SCARA3
mut vs wt d702factor 2x q05		NR1H3	0.308	ligand-dependent nuclear receptor		0.564		-0.028	0.67	0.0001	ACTA2,ANGPTL3,APCS,APOD,CCR1,CCR3,CD274,CDKN1A,CENPF,CH25H,CRP,CXCL10,CXCL2,DIO2,GAS6,IL1B,IL6,PLTP,PRDM16,SCD,TBX1,VEGFA,VIPR1	AKT1,CEBPB,FOXO3,JUN,NCOA2,NFE2L2,NFkB (complex),NR1H3,NR5A2,PPARG,PPARGC1A,RARA,RARB,RELA,RXRA,SP1,SREBF1,STAT3,THRB,TP53,cholesterol
mut vs wt d702factor 2x q05		PROC	1.218	peptidase		0.565		0.065	0.42	0.0158	CXCL2,CXCL3,F5,IL1B,IL6,TNFAIP3
mut vs wt d702factor 2x q05		PRNP	0.337	other		0.57		-0.021	0.625	0.0485	FGF9,FST,GJA1,IL1B,IL6,PLAUR,SNAP25
mut vs wt d702factor 2x q05		VitaminD3-VDR-RXR		complex		0.579		-0.128	0.935	0.000655	CDKN1A,CXCL10,HSD17B2,IGFBP3,IGFBP6,SPP1,TRPV6,WT1
mut vs wt d702factor 2x q05		ciglitazone		chemical drug		0.589		0.031	0.511	0.0192	ABCA12,ACTA2,CDKN1A,IL6,IVL,LCN2,SCGB1A1,TNFSF10
mut vs wt d702factor 2x q05		ITGB1	0.029	transmembrane receptor		0.59		-0.02	0.681	2.33e-08	ACTA2,ADAMTS5,CCN4,CDH2,CDKN1A,COL19A1,FBN2,IL1B,IL6,ITGA5,ITGA9,ITGB7,LOX,LOXL1,NPPB,OLFML3,PAPPA,PLAUR,SEMA5B,TNFAIP3,VEGFA,VIM,WNT5A	FN1,FOS,HIF1A,ITGB1,JUN,MAPK8,NFE2L2,NFKB1,NFKBIA,NFkB (complex),RAC1,RELA,SMAD3,SMAD4,SP1,SPP1,STAT3,TGFB1,TP53
mut vs wt d702factor 2x q05		DRD2	-0.624	g-protein coupled receptor		0.6		-0.028	0.662	0.00174	BDNF,CRYAB,IGFBP3,KCNJ2,PCSK1,VEGFA	CEBPB,Creb,DRD2,EGR1,EP300,ERK1/2,FOS,HDAC1,JUN,NFKB1,NFKBIA,NGF,RAF1,RELA,SMAD3,SP1,STAT3,TP53,cyclic AMP
mut vs wt d702factor 2x q05		GRIN3A	0.187	ion channel		0.607		0.196	-0.089	0.00115	BDNF,CD200,CDH10,DCN,HFM1,ITGA8,KCND2,LGI1,PDE4B,ROBO2,SV2B,TMEFF1,TRPM3
mut vs wt d702factor 2x q05		GW3965		chemical reagent		0.608		0.021	0.528	5.66e-05	ADRA2A,ANGPTL3,APOD,CENPF,CH25H,CRP,CXCL10,GNG2,IL1B,IL6,PDK4,PLTP,SCD,SLC2A2,VEGFA,VIPR1	AR,CREBBP,CTNNB1,D-glucose,ESR1,GW3965,HIF1A,JUN,MYC,NFkB (complex),NR1H2,NR1H3,NR1I2,PDX1,PGR,PPARG,RXRA,SREBF1,STAT1,STAT3,progesterone
mut vs wt d702factor 2x q05		fibric acid derivative		chemical drug		0.61		-0.036	0.689	0.00247	APOA2,APOB,IL6,PDK4,SCD	NFE2L2,NFkB (complex),RELA,SREBF1,STAT3,cholesterol,fibric acid derivative
mut vs wt d702factor 2x q05		mir-146		microrna		0.618		0.15	0.291	0.0452	CXCL10,CXCL3,IL1B,IL6,NLGN1
mut vs wt d702factor 2x q05		TCF7L2	-0.186	transcription regulator		0.625		-0.172	1.343	0.045	ALOX5,ANXA1,APLP1,APOD,CCND2,CD24,CDKN1A,FBXO32,IL1RAP,LEF1,LGI3,MAN1A1,NINJ2,PARVB,SNAI2,SORBS3,SPP1,SRD5A1,TNS1,UGT8,VEGFA
mut vs wt d702factor 2x q05		CREB1	-0.386	transcription regulator		0.63		-0.067	1.084	4.61e-08	ANGPTL2,BDNF,CDA,CDH10,CDH2,CDKN1A,CGREF1,CH25H,CHGA,COCH,CTNNA2,CXCL2,DIO2,DMBT1,FOXE1,GALR1,GPNMB,HPGD,HTR2C,IGSF9B,IL1B,IL6,INHA,KCND2,LCN2,MDGA1,MGAT4C,MNS1,NEURL1B,NNAT,PCDH19,PCSK1,PDE3A,PDE3B,PNMT,PTPRR,RIPOR2,RSPO2,SCD,SFRP4,SLC2A3,SLC6A1,SOCS2,SPAG4,SPOCK3,SPRED3,SRD5A1,SRXN1,STC1,TF,TFAP2A,VEGFA,VIM,YPEL1	CEBPA,CEBPB,CREB1,CREBBP,CTNNB1,Creb,ESR2,FOS,FOXM1,JUN,NCOA2,NFKB1,NFKBIA,NFkB (complex),PPARG,RELA,SMAD4,STAT3,TCF,TP53
mut vs wt d702factor 2x q05		GPX1	0.532	enzyme		0.64		0.141	0.296	0.00276	ACTA2,CXCL10,CXCL3,GLRX,GPX2,IL6,TNFSF10	AKT1,CEBPB,FOS,FOXO3,GPX1,JUN,JUND,LEP,MYC,NFKB1,NFKBIA,NFkB (complex),PPARG,RELA,SP1,STAT3,TP53
mut vs wt d702factor 2x q05		carbon tetrachloride		chemical toxicant		0.645		-0.122	1.179	7.76e-06	ABCC2,ACTA2,APOA2,APOB,CCR1,CDKN1A,CNR1,COL3A1,CPS1,CXCL10,CXCL6,CYP1A1,CYP1A2,DCLK1,H19,IGFBP6,IL13RA2,IL1B,IL6,ITGA8,KDR,NQO1,SPP1,TF,UGT1A3	AHR,CEBPB,CTNNB1,FOS,HIF1A,IGF1,IL6,JUN,JUND,MYC,NFKBIA,NFkB (complex),RELA,SMAD3,SMAD4,SMAD7,SP1,STAT3,TNF,TP53,carbon tetrachloride
mut vs wt d702factor 2x q05		LHX2	-0.476	transcription regulator		0.655		-0.089	0.829	0.0232	BDNF,DIO2,NQO1,ROBO2
mut vs wt d702factor 2x q05		suramin		chemical drug		0.655		0.007	0.641	0.0373	CDH2,FST,IL6,LOX
mut vs wt d702factor 2x q05		MAP2K6	-0.983	kinase		0.658		-0.136	1.037	7.44e-07	ACP5,ACTA2,BGN,CDKN1A,CHGA,CRYAB,CXCL10,IL13RA2,IL6,IVL,NPPB,NPR1,PTH1R,TNFSF10,VDR	CEBPB,DDIT3,FOS,JUN,JUND,MAP2K6,MAPK11,MAPK13,MAPK14,MYC,NFAT5,NFE2L2,NFkB (complex),P38 MAPK,SP1,STAT3,TP53,TP73,ZFP36
mut vs wt d702factor 2x q05		N-acetyl-L-cysteine		chemical drug		0.668		0.117	0.156	0.00152	ACTA2,AR,AVPR1A,CASP1,CCND2,CD274,CDKN1A,CXCL10,CXCL3,FBXO32,GJA1,IL1B,IL6,ITGA4,NPPB,NQO1,PLAUR,SLC2A2,SPP1,TNC,VEGFA	CEBPB,FOS,JUN,JUND,MYC,N-acetyl-L-cysteine,NFKB1,NFKBIA,NFkB (complex),P38 MAPK,RELA,SP1,STAT3,TNF,TP53,ZFP36,hydrogen peroxide
mut vs wt d702factor 2x q05		rosiglitazone		chemical drug		0.67		-0.062	1.018	7.43e-05	ACSL5,ADAMTS1,AGTR1,ALOX5,ANGPTL3,APOA2,BDNF,CCL15,CCN4,CCRL2,CDKN1A,COL3A1,CRP,CXCL10,CYP1A1,CYP2B6,DIO2,EGLN3,HPGD,IGFBP6,IL1B,IL6,KLF11,KLF2,LCN2,LDHA,LOX,MX2,NPPB,PDK1,PDK4,PLTP,S100A9,SCD,SLC27A6,SLC2A1,SLC2A2,TNC,VEGFA	AHR,CEBPB,IL1B,JUN,LEP,NCOA2,NFKB1,NFKBIA,NFkB (complex),PPARG,RARA,RARB,RELA,RXRA,SP1,STAT3,THRB,TNF,rosiglitazone
mut vs wt d702factor 2x q05		GATA6	-0.374	transcription regulator		0.679		-0.004	0.697	0.00085	ACTA2,BMP5,C1R,CDKN1A,CRABP2,CXCL13,EVPL,HYAL1,IL1B,KLF2,LEFTY1,MEF2C,POU5F1,PRDM1,SCD,SCGB1A1,SFTPC,SORBS3,TNFSF10	AR,CEBPB,GATA6,JUN,MAPK14,SMAD2,SMAD3,SMAD4,SP1,STAT3,TP53,TP73
mut vs wt d702factor 2x q05		FOXO4	0.222	transcription regulator		0.687		-0.004	0.699	0.000244	APLN,CCND2,CDKN1A,CH25H,FLT4,FMOD,FOXC1,IGFBP7,ITGB2,PTPRB,SCD,SLC2A1,SOX5,VEGFA	AR,Akt,EGR1,FOXO1,FOXO4,HIF1A,Hif1,NFKB1,PPARG,SMAD3,SP1,STAT3,VHL
mut vs wt d702factor 2x q05		dorsomorphin		chemical - kinase inhibitor		0.688		0.033	0.609	0.0268	CD274,COL2A1,CPA1,IL6,KDR,TFEB
mut vs wt d702factor 2x q05		ESR1	-0.483	ligand-dependent nuclear receptor		0.69		-0.028	0.919	9.64e-08	ABCG2,ACTA2,ADAMTS5,ADH1C,AK1,ALOX5,ANGPTL2,AR,BDNF,CCL15,CDKN1A,CDKN1C,CEACAM5,CENPF,CHRM2,CHST2,CKB,CLDN8,CLIC3,COL16A1,COL8A1,CP,CRABP2,CXCL3,CYP1A1,CYP1B1,DCDC2,DMTN,FBLN1,FMN1,FOXC1,FST,FXYD6,GAS7,GJA1,GLRX,GOPC,GPR158,GREB1,H19,HTR2C,HYAL1,IFITM1,IFITM2,IGFBP3,IL1B,IL6,INHBB,IVL,KCNMA1,KISS1R,LAPTM5,LCN2,MAN1A1,MAPK11,MAPK12,NLGN1,NPR3,NQO1,PCDH18,PCP4,PCSK1,PDK4,PITX1,PITX2,PLAUR,PLCB1,PLO…	4-hydroxytamoxifen,AHR,CEBPB,CTNNB1,EGF,ESR1,ESR2,FOS,JUN,JUND,MED1,MYC,NFKB1,NRIP1,RNA polymerase II,SMAD3,SP1,STAT3,TP53,beta-estradiol
mut vs wt d702factor 2x q05		CORT	-0.019	other		0.692		0.122	0.373	0.000331	BDNF,CCR1,CCR3,CXCL10,CXCL3,IL1B,IL6	ADCY,CORT,Creb,NFATC1,RELA
mut vs wt d702factor 2x q05		laquinimod		chemical drug		0.693		-0.196	1.416	0.000244	ADAMDEC1,AHRR,AMZ1,CCR1,CYP1A1,CYP1A2,CYP1B1,GPNMB,IDO2,INHBB,OLFML2A,PPP1R3G,SERPINB2,TPH1
mut vs wt d702factor 2x q05		TXN	0.487	enzyme		0.701		-0.033	0.797	0.000198	CCND2,CDKN1A,CYP1A1,CYP1B1,IL1B,IL6,LEF1,POU5F1,VEGFA	AHR,ARNT,CEBPB,EGFR,HIF1A,JUN,NFKB1,NFKBIA,NFkB (complex),P38 MAPK,RELA,SMAD3,SMAD4,SMAD7,SP1,STAT3,TP53,TXN,ZFP36
mut vs wt d702factor 2x q05		estriol		chemical - endogenous mammalian		0.707		0.152	0.276	0.000562	CCR1,CXCL10,CXCL2,CXCL3,CXCL6,IL1B,IL6,ITGB2	AKT1,CEBPB,CTNNB1,Creb,D-glucose,EGR1,ERK,ERK1/2,ESR1,ESR2,FOS,FOXO3,HIF1A,JUN,MYC,NFKB1,NFkB (complex),PDX1,PPARG,RELA,SMAD3,SP1,STAT3,TP53,beta-estradiol,estriol
mut vs wt d702factor 2x q05		LRP6	0.314	transmembrane receptor		0.708		-0.01	0.729	0.0489	ACTA2,IL1B,IL6,SLC2A3,VIM
mut vs wt d702factor 2x q05		NR4A1	0.133	ligand-dependent nuclear receptor		0.712		0.041	0.556	0.0087	ACTA2,AKR1C1/AKR1C2,ALDOB,APOB,APOD,ATP12A,ATP4B,CCND2,CLDN5,COL16A1,CRABP2,ENO2,IL1B,IL6,MYCN,NT5E,PDK1,PDK4,RLN3,SCD,TNFSF10	6-mercaptopurine,Akt,CTNNB1,D-glucose,EGR1,FOXM1,FOXO1,HIF1A,JUN,MYC,NCOA2,NFKB1,NFkB (complex),NR4A1,PDX1,PPARG,RARA,RARB,RXRA,SMAD3,SMAD4,SP1,STAT3,TCF,THRB
mut vs wt d702factor 2x q05		CDH1	-0.394	other		0.72		-0.017	0.768	0.0284	CDH2,IFITM1,IGFBP3,LCN2,PLAUR,SNAI2,VEGFA,VIM
mut vs wt d702factor 2x q05		IL13	0.176	cytokine		0.723		-0.094	1.221	0.000604	ADAMDEC1,BATF,BDNF,CASP1,CD101,CD37,CHST2,COL3A1,CP,CTSV,CXCL10,CXCL2,CXCL3,CXCL6,DMBT1,FLG,FXYD3,GAS6,GAS7,GPNMB,IL13RA2,IL1B,IL6,IVL,MMP10,NTN1,PTH1R,SLA,SNAI2,SPP1,TFEC,TNFRSF11A,TNS1,WNT5A	CEBPB,CTNNB1,Creb,EGR1,ERK1/2,ESR2,FOS,IFNG,IL13,JUN,JUND,MYC,NFKB1,NFKBIA,NFkB (complex),PPARG,RELA,SP1,STAT1,STAT3
mut vs wt d702factor 2x q05		IRF5	0.319	transcription regulator		0.723		-0.148	1.077	0.034	CDKN1A,COL3A1,CXCL10,CXCL2,IL6,PRDM1,TNFSF10,VEGFA
mut vs wt d702factor 2x q05		SIRT1	-0.312	transcription regulator		0.725		0.071	0.405	0.00142	ABCC2,ADAMTS5,APLN,BDNF,CCND2,CDH2,CDKN1A,CNR1,COL2A1,CPA1,CYP1A1,CYP2B6,EPDR1,ERO1A,EVPL,FBXO32,GBP6,IL1B,IL6,KLF2,LAPTM5,MEF2C,NAT1,NLGN1,NLGN2,PDK4,POU5F1,PRDM16,PTN,SFRP4,SLC27A6,WNT1	Akt,CTNNB1,EGR1,FOXO1,FOXO3,HDAC1,Hdac,Histone h4,MED1,NFATC1,NFKB1,NFkB (complex),PI3K (complex),PPARG,PPARGC1A,RELA,RNA polymerase II,SIRT1,SMAD3,SP1,STAT3,TP53
mut vs wt d702factor 2x q05		HOXA11	-0.729	transcription regulator		0.728		-0.103	0.976	0.000185	ANXA1,CTSV,ITGA8,KLF2,SIX2,SPP1
mut vs wt d702factor 2x q05		VTN	0.175	other		0.728		-0.09	0.947	0.00244	CDKN1A,CXCL3,IL1B,ITGA4,ITGA5,PLAUR	CEBPB,CTNNB1,Creb,EGR1,ERK1/2,FN1,FOS,ITGA5,JUN,NFKB1,NFkB (complex),P38 MAPK,PLAU,RELA,SMAD3,SP1,STAT1,STAT3,STAT4,VTN,ZFP36
mut vs wt d702factor 2x q05		TGFBR2	0.462	kinase		0.732		-0.025	0.848	2.34e-11	ACTA2,ADAMTS5,ALOX5,AR,BDNF,BGN,BMP5,CASP1,CDH2,CDHR1,CDKN1A,CHRM3,CRYAB,CXCL2,CXCL6,FGF9,FMOD,FST,GJA1,HPGD,IL1B,IL1RAP,IL6,KDR,MMP10,PDPN,PITX2,PTH1R,PTPN20,SLC2A3,SPP1,VEGFA,ZNF365	CREB1,CTNNB1,FOXM1,HIF1A,ICAM1,JUN,MYC,NFkB (complex),NOTCH1,SMAD3,SMAD4,SP1,STAT1,STAT3,TCF,TGFB1,TGFBR2,TP53,Tgf beta
mut vs wt d702factor 2x q05		FOXA1	-0.64	transcription regulator		0.732		-0.005	0.75	8.94e-05	ACTA2,ADH1C,ANXA1,CDKN1A,CPS1,CXCL10,FMN1,FOXC1,FSTL1,GREB1,H19,IL6,LEFTY1,NES,SCGB1A1,SFTPC,SNAI2,TAT,TF	CEBPB,CTNNB1,EGR1,ESR2,FOS,FOXA1,FOXA2,FOXA3,FOXO1,JUN,JUND,MYC,NFATC1,NFkB (complex),PPARG,PPARGC1A,RNA polymerase II,SIRT1,SP1,STAT3,TP53
mut vs wt d702factor 2x q05		flutamide		chemical drug		0.733		0.06	0.528	3.26e-06	AGTR1,AR,COL3A1,CXCL2,CYP1A1,CYP1A2,CYP1B1,CYP4B1,GAS6,IL6,KDR,NQO1,NR5A1,SERPINA5,SRD5A1,VIM	AR,BRCA1,CEBPB,CTNNB1,Ccl2,ESR1,ESR2,IL6,JUN,NFKBIA,NFkB (complex),RELA,SMAD3,SP1,STAT3,TNF,TP53,beta-estradiol,flutamide
mut vs wt d702factor 2x q05		okadaic acid		chemical toxicant		0.744		-0.058	0.95	4.89e-05	ANXA1,AR,BDNF,CCND2,CRABP2,CXCL2,CYP1B1,CYP2B6,IL1B,IL6,IRS4,NDRG1,SAA1,SPP1	CTNNB1,EGR1,EP300,FOS,FOXM1,HDAC1,JUN,JUND,MYC,NFKB1,NFKBIA,NFkB (complex),PPARG,RELA,SMAD3,SMAD4,SP1,STAT3,TCF,TP53,okadaic acid
mut vs wt d702factor 2x q05		CITED2	0.442	transcription regulator		0.744		0.02	0.69	0.00048	EGLN3,IL1B,IL6,NR5A1,PITX2,POU5F1,TNFAIP3,VEGFA	AHR,AR,CITED2,CREBBP,CTNNB1,EP300,HIF1A,Hif1,IL1B,JUN,KLF4,NFKB1,NFKBIA,NFkB (complex),PPARG,RELA,RXRA,SMAD3,SP1,STAT3,TP53,VHL
mut vs wt d702factor 2x q05		FOSL1	0.171	transcription regulator		0.748		-0.006	0.768	2.07e-05	BDNF,CXCL6,HPGD,IL1B,IL6,IVL,MMP10,PLAUR,PRDM1,SEMA6D,SERPINB2,SNAI2,TF	CEBPB,Creb,ESR2,FOS,FOSL1,JUN,JUNB,JUND,NFATC1,NFE2L2,NFKB1,NFKBIA,NFkB (complex),PPARG,PRDM1,RELA,SMAD3,STAT1,STAT3
mut vs wt d702factor 2x q05		CEBPB	0.297	transcription regulator		0.749		-0.129	1.546	5.78e-09	ACTA2,ADH1C,AKR1B10,AKR1C3,APCDD1,APCS,APLN,APOB,BDNF,CCND2,CDKN1A,CDO1,CP,CRP,CXCL10,CXCL2,CXCL3,CYP1A1,CYP2A6 (includes others),DCN,ENTPD2,FBLN1,FBXO32,FKBP6,GLIPR2,H4C8,IGFBP3,IL1B,IL6,IVL,LCN2,MMP10,PDK4,PLAUR,PRDM1,RGS4,SAA1,SAA2,SCD,SERPINB2,SIM2,SPP1,TF,TM4SF1,VDR,VIM,XIST	CEBPA,CEBPB,ESR2,FOS,HDAC1,IL10,IL6,JUN,JUNB,JUND,MYC,NFKB1,NFKBIA,NFkB (complex),PPARG,RELA,SP1,STAT3,TP53
mut vs wt d702factor 2x q05		LRP1	-0.189	transmembrane receptor		0.75		0.039	0.637	3.42e-05	C1R,CDH2,COL3A1,GLI3,IL1B,IL6,SLC2A3,SMO,WNT1,WNT5A	Akt,CEBPB,EGR1,FN1,FOXO1,JUN,LRP1,NFE2L2,NFKB1,NFkB (complex),P38 MAPK,RAC1,RELA,SMAD3,SP1,SREBF1,STAT3,ZFP36,cholesterol
mut vs wt d702factor 2x q05		DDX3X	-0.172	enzyme		0.762		-0.173	1.105	0.00501	CDKN1A,IL1B,MAPK11,MAPK12	DDX3X,FN1,HDAC1,JUN,MYC,NFKBIA,NFkB (complex),RELA,SMAD3,SP1,STAT1,STAT3,TP53,VTN
mut vs wt d702factor 2x q05		PIAS1	0.18	transcription regulator		0.762		0.022	0.726	0.0196	ACTA2,CDKN1A,KLF2,SCD,SLC51B
mut vs wt d702factor 2x q05		MAC		complex		0.762		-0.181	1.122	0.0264	AKR1C3,CXCL2,RGCC,SPP1
mut vs wt d702factor 2x q05		selumetinib		chemical drug		0.762		0.047	0.669	0.0334	CD274,CDKN1A,GPNMB,SLC2A1
mut vs wt d702factor 2x q05		SRC (family)		group		0.765		-0.123	1.032	0.0227	CDH2,CDKN1C,CYP1A1,IL6,KLF2,NEUROG3
mut vs wt d702factor 2x q05		NFE2L2	0.155	transcription regulator		0.766		-0.126	1.419	0.00683	ABCC2,ABCG2,ACSL5,AKR1B10,AKR1C1/AKR1C2,APCS,BDNF,CDKN1A,COL3A1,CXCL10,CXCL2,CXCL3,CXCL6,GPX2,IL1B,IL6,KCNMB4,MEF2C,MMP10,NQO1,PITX2,PTPRB,RAMP2,SAA1,SLC2A1,SNAI2,SRXN1,SULT1E1,TUB,UGT1A1,VEGFA	AHR,CEBPB,Creb,HMOX1,IL1B,JUN,NFE2L2,NFKB1,NFKBIA,NFkB (complex),P38 MAPK,RELA,SMAD3,SP1,STAT1,STAT3,ZFP36
mut vs wt d702factor 2x q05		PPARA	0.152	ligand-dependent nuclear receptor		0.766		-0.054	1.014	0.0257	ACSL5,ALDOB,APCS,APOA2,BDNF,C1R,CA9,CDKN1A,CHRNA2,CPS1,CYP1A1,CYP2B6,DIO2,IGFBP3,IGFBP6,IL1B,IL6,KRT23,LIPG,NPPB,PDK4,PLTP,PRDM16,S100A9,SAA1,SCD,SOCS2,TFEB,VEGFA
mut vs wt d702factor 2x q05		AR	-1.069	ligand-dependent nuclear receptor		0.768		-0.116	1.465	3.86e-09	AKR1C3,ALOX15B,AR,AVPR1A,CDH2,CDKN1A,CDO1,COL3A1,CORIN,DSC2,ELMO1,ENO2,ERO1A,ESPN,FXYD3,GAS6,GJA1,HOPX,IGFBP3,IL6,INHA,KCNJ2,KIF15,KISS1R,LGALS7/LGALS7B,LRATD1,MEF2C,MSI1,NDRG1,NR5A1,P4HA1,PCSK1N,PGC,PLOD2,PLTP,PNMT,RAB3C,SERPINA5,SLC22A4,SLC2A3,SNAI2,SPP1,SRD5A1,SRY,SULT1E1,TAT,TF,TNFSF10,TNNT2,UNC5C,VEGFA,VIM,WT1	AHR,AR,CREB1,CTNNB1,Creb,EGR1,EP300,ESR2,FOXO3,HDAC1,HIF1A,IGF1,JUN,MYC,NFkB (complex),SMAD3,SMAD4,SMAD7,SP1,STAT3,TP53,dihydrotestosterone,testosterone
mut vs wt d702factor 2x q05		VLDLR	0.606	transporter		0.776		0.078	0.603	5.2e-05	APOB,DAB1,IL6,SLC2A1,TNFAIP3
mut vs wt d702factor 2x q05		LGR4	-0.29	transmembrane receptor		0.786		-0.079	1.032	6.37e-06	CXCL10,CYP1A2,HAL,IL1B,IL6,LEF1,PLBD1,SLC13A3,VIM,WNT5A	AHR,Akt,CEBPB,CREBBP,CTNNB1,Creb,EGR1,ESR2,FOXO1,LGR4,NCOA2,NFATC1,NFKB1,NFKBIA,NFkB (complex),RELA,RNA polymerase II,SMAD3,SP1,STAT3,TNFSF11,TP53
mut vs wt d702factor 2x q05		NGF	-0.49	growth factor		0.789		-0.123	1.217	0.00491	AKR1B10,BDNF,CDKN1A,CRYAB,EGLN3,FAH,FRRS1,MMP10,MYCN,PLAUR,PNMT,RGS4,SEMA6D,SNAP25,TACR1,TFAP2A,VEGFA,WNT5A,WT1	CEBPB,CREB1,Creb,EGR1,EP300,ERK1/2,ESR2,FOS,HDAC1,IL6,JUN,JUND,NFKB1,NFKBIA,NFkB (complex),NGF,NTRK2,RELA,SMAD3,SP1,STAT3,TP53
mut vs wt d702factor 2x q05		TSHZ3	-0.65	transcription regulator		0.792		-0.029	0.878	0.000488	ACVR1C,ADCY2,COL5A1,FMOD,IGFBP3,KLHL1,PODN,RSPO2,SLA
mut vs wt d702factor 2x q05		PDGF-AA		complex		0.793		-0.117	1.023	0.0177	ACTA2,CDKN1A,IL6,VIM
mut vs wt d702factor 2x q05		epigallocatechin-gallate		chemical drug		0.796		0.067	0.53	0.00468	ACP5,APOB,AR,CACNB3,CASP1,CDKN1A,CLDN5,CXCL10,CXCL3,GJA1,IL1B,IL6,IVL,KDR,PTN,SNAI2,TNFSF10,VEGFA,VIM	CEBPB,CTNNB1,Creb,FOS,JUN,JUND,MYC,NFKB1,NFKBIA,NFkB (complex),P38 MAPK,PPARG,PTGS2,RELA,SP1,STAT1,STAT3,TP53,ZFP36,epigallocatechin-gallate
mut vs wt d702factor 2x q05		3,4,5,3',4'-pentachlorobiphenyl		chemical toxicant		0.802		-0.092	1.094	0.000252	BDNF,CCND2,CLDN5,CYP1A1,CYP1A2,CYP1B1,FGF9,IGFBP3,NQO1,SERPINA7,SOCS2,TNC	3,4,5,3',4'-pentachlorobiphenyl,9,10-dimethyl-1,2-benzanthracene,AHR,AR,ARNT,CEBPB,ESR1,ESR2,FOS,HIF1A,JUN,JUND,MYC,NFKB1,NFkB (complex),NR1I2,PGR,RARA,RELA,SP1,STAT1,STAT3,TP53,estrogen receptor,progesterone
mut vs wt d702factor 2x q05		pioglitazone		chemical drug		0.805		-0.017	0.86	0.0317	ACTA2,APOA2,APOB,CDKN1A,CXCL10,CYP2B6,HPGD,IL1B,IL6,PDE3B,SLC2A1,SLC2A2,TNFRSF11A
mut vs wt d702factor 2x q05		glucocorticoid		chemical drug		0.806		0.01	0.757	5.04e-06	ALOX5,ANXA1,APLN,BDNF,CDKN1A,CHGA,CLDN5,CNR1,CXCL13,CXCL2,CYP2B6,DELEC1,FBLN1,GPR158,HTR2C,IGFBP3,IL1B,IL6,INPP5D,PNMT,RAMP2,RRM2B,SCGB1A1,SERPINA7,SPP1,STC1,TACR1,TAT,VDR,VEGFA,VIPR1	CEBPB,Creb,EGR1,ERK1/2,FOS,IL10,IL4,JUN,NFKB1,NFKBIA,NFkB (complex),PPARG,PTGS2,RELA,SP1,STAT3,TNF,TP53,glucocorticoid
mut vs wt d702factor 2x q05		panobinostat		chemical drug		0.806		0.021	0.757	0.0227	CCND2,CDKN1A,CRYAB,CXCL10,ULBP2,VIM
mut vs wt d702factor 2x q05		bevacizumab		biologic drug		0.816		0.081	0.619	4.89e-05	CDH2,CXCL6,KDR,SNAI2,VEGFA,VIM	CTNNB1,Creb,EGFR,EGR1,FOXO1,FOXO3,HIF1A,JUN,NFKB1,NFkB (complex),NOTCH1,RELA,SP1,STAT3,VEGFA,Vegf,bevacizumab
mut vs wt d702factor 2x q05		zVAD-FMK		chemical - protease inhibitor		0.816		-0.005	0.828	0.0158	CASP1,CDKN1A,CXCL3,IL1B,IL6,TFAP2A
mut vs wt d702factor 2x q05		Map3k7		kinase		0.818		-0.142	1.173	0.00817	CXCL10,CXCL3,H19,IL1B,IL6,S100A9,SCD,WNT11	AHR,CEBPB,Ccl2,Creb,EGR1,ERK1/2,FOS,IL1B,Map3k7,NFKB1,NFKBIA,NFkB (complex),RELA,SP1,STAT3,TP53
mut vs wt d702factor 2x q05		VIP	1.868	other		0.823		0.021	0.767	0.0413	CD274,CXCL10,CXCL2,CXCL3,IL1B,IL6,TNFRSF11A,VIM,VIPR1
mut vs wt d702factor 2x q05		acriflavine		chemical toxicant		0.83		0.16	0.515	0.000852	CA9,CD274,NT5E,PTPRB	AR,CTNNB1,EP300,EPAS1,HIF1A,Hif1,MYC,PPARG,RNA polymerase II,STAT3,VHL,acriflavine
mut vs wt d702factor 2x q05		miR-125b-5p (and other miRNAs w/seed CCCUGAG)		mature microrna		0.83		0.196	0.252	0.0213	ADAMTS1,ALOX5,APLN,CYP1A1,IGFBP3,MAN1A1,SCD,SMO,VSIR
mut vs wt d702factor 2x q05		MAD2L2	-0.006	enzyme		0.831		0.131	0.572	0.000104	CDH2,POU5F1,SNAI2,VIM	MAD2L2,RUNX2,SNAI2
mut vs wt d702factor 2x q05		cardiotoxin		chemical - other		0.832		-0.196	1.538	5.55e-05	ACSL5,BGN,CASP1,CCND2,CCR1,CTSV,FGF11,H19,IGFBP7,IL1B,IL6,ITGA4,ITGA5,ITGB2,ITGB7,LCN2,PTN,S100A9,SERPINB2,SPP1
mut vs wt d702factor 2x q05		WIN 55,212-2		chemical - other		0.842		0.056	0.733	0.00396	AR,BDNF,CNR1,VEGFA	AKT1,CEBPB,CNR1,CREBBP,CTNNB1,Creb,EGR1,ERK1/2,ESR2,FOS,FOXO3,JUN,NCOA2,NFKB1,NFkB (complex),SP1,TP53,WIN 55,212-2
mut vs wt d702factor 2x q05		enalapril		biologic drug		0.847		-0.022	0.918	1.71e-05	ABCC2,ADAMTS1,CP,EFEMP2,GPX2,KDR,LCN2,PTH1R,SLC2A2,SLC34A2,SPP1	HGF,NFKB1,NFKBIA,NFkB (complex),RELA,STAT3,enalapril
mut vs wt d702factor 2x q05		FOXA2	-0.023	transcription regulator		0.848		-0.054	1.059	5.15e-05	ACTA2,ADH1C,ALDOB,ALOX5,APOB,CER1,CHRD,CTHRC1,CYP2A6 (includes others),H19,HPGD,IL13RA2,IL6,LEFTY1,ONECUT1,SAA1,SCD,SCGB1A1,SLC2A2,SMOC1,TAT,TBX1,TF,WNT5A	CEBPB,FOS,FOXA1,FOXA2,FOXA3,FOXO1,IL6,JUN,MYC,NFKBIA,RELA,RNA polymerase II,STAT3,estrogen receptor
mut vs wt d702factor 2x q05		L-type Calcium Channel		complex		0.849		-0.147	1.139	0.0002	ANKH,BDNF,ENPP1,KCNJ2	AHR,CTNNB1,Ca2+,Creb,ESR1,JUN,JUND,L-type Calcium Channel,Pkc(s),SP1,TP53
mut vs wt d702factor 2x q05		LY6E	-0.273	other		0.849		0.02	0.81	0.00922	ABCG2,CD274,IL1B,IL6	AHR,LY6E,NFkB (complex),SMAD3,SMAD4,SMAD7,STAT3
mut vs wt d702factor 2x q05		puromycin		chemical - endogenous non-mammalian		0.849		0	0.849	0.00922	CYP1A1,CYP2B6,IL1B,VEGFA	BCL2,GLI1,NFKBIA,RELA,SP1,TP53,puromycin
mut vs wt d702factor 2x q05		N(G)-monomethyl-D-arginine		chemical - endogenous mammalian		0.849		0.013	0.823	0.0373	CXCL3,ITGB2,PLAUR,VEGFA
mut vs wt d702factor 2x q05		actinomycin D		biologic drug		0.852		0.097	0.368	1.32e-05	ABCC2,AR,AVPR1A,BDNF,CASP1,CD70,CDH2,CDKN1A,COL2A1,CYP1A1,EGLN3,IL6,NPPB,PAPPA,PDE3A,PLAUR,PTH1R,PTX3,RGS4,RRM2B,SLC2A1,SPP1,TACR1,TF,VDR,VEGFA	AHR,CEBPB,CTNNB1,FOS,HDAC1,IL1B,JUN,MAPK8,MYC,NFKB1,NFKBIA,NFkB (complex),RELA,SMAD3,SP1,STAT3,TNF,TP53,actinomycin D
mut vs wt d702factor 2x q05		tamoxifen		chemical drug		0.86		-0.009	0.903	0.000649	ABCG2,ACOX2,BDNF,BMP5,CDH2,CDKN1A,CLIC3,CYP2B6,GREB1,H19,IGFBP3,IL6,IVL,LOXL2,NNMT,PCP4,POU5F1,SCD,SLC2A1,SLC2A3,SP4,SPP1,SSTR2,TMSB15A,TYMP,VDR,VEGFA	AR,CEBPB,EGR1,EP300,ESR1,ESR2,HDAC1,HIF1A,JUN,NFkB (complex),NR1I2,PGR,RARA,SMAD3,SMAD4,SP1,STAT3,TGFB1,TP53,estrogen,estrogen receptor,progesterone,tamoxifen
mut vs wt d702factor 2x q05		DLL4	-0.196	other		0.861		-0.027	0.92	0.0417	ACTA2,KDR,RGS5,UNC5B,VEGFA
mut vs wt d702factor 2x q05		GW501516		chemical drug		0.862		-0.132	1.228	8.26e-06	APOA2,APOD,CDKN1A,COL5A1,CXCL6,IGFBP3,IGFBP6,IL1B,IL6,LIPG,PDK4,S100A9,SAA1,SCD,SERPINB2,VEGFA	CEBPB,CTNNB1,Creb,EGR1,ERK1/2,FOS,FOXO1,GW501516,IL6,JUN,MYC,NFKB1,NFKBIA,NFkB (complex),NR1H3,PDPK1,PPARD,PPARG,RELA,RXRA,SMAD3,SP1,STAT1,STAT3
mut vs wt d702factor 2x q05		U0126		chemical - kinase inhibitor		0.866		0.132	0.071	1.4e-06	ABCG2,ACTA2,BDNF,CA9,CACNB3,CCN4,CCND2,CD200,CD274,CDKN1A,CDKN1C,CHGA,COL2A1,CXCL10,CXCL2,CXCL3,CYP1A1,CYP1B1,CYP2A6 (includes others),CYP2B6,GJA1,HAPLN1,HPGD,IL13RA2,IL1B,IL1RAP,IL6,ITGA5,KDR,NES,NNAT,NR5A1,PLAUR,PNMT,S100A9,SERPINB2,SFTPC,SLC2A3,SNAI2,SPP1,STC1,STC2,SYK,TF,TYMP,VEGFA,VIM,WT1	CEBPB,CTNNB1,Creb,EGF,EGR1,EP300,ERK1/2,FOS,FOXM1,HDAC1,JUN,JUND,MYC,NFKB1,SMAD3,SMAD4,SP1,STAT3,TCF,TP53,U0126
mut vs wt d702factor 2x q05		PDPK1	0.436	kinase		0.87		-0.028	0.935	0.000405	CDKN1A,CXCL10,IL1B,IL6,KLF2,SERPINB2,XIST	EGR1,ERK,FOXO1,IKBKB,NFATC1,NFKB1,NFKBIA,NFkB (complex),PDPK1,PPARG,PPARGC1A,RELA,SIRT1,SMAD3,STAT3,TP53,TP63
mut vs wt d702factor 2x q05		tetrachlorodibenzodioxin		chemical toxicant		0.876		-0.017	0.967	2.36e-09	ABCC2,ABCG2,AHRR,ALOX5,AR,ATOH8,BDNF,CDKN1A,CHST2,COL9A2,CTSV,CYP1A1,CYP1A2,CYP1B1,CYP2A6 (includes others),CYP4B1,DSC2,EMP3,FGF9,HUNK,IL1B,IL6,ITGA5,ITGB7,KLF2,LRP2,NQO1,PCSK1,PDE4B,PRDM1,S100A9,SAA1,SERPINA7,SERPINB2,SIM1,SLC2A1,SLC2A3,SOCS2,STC2,TNC,UGT1A1,UGT1A3,VEGFA,ZFP57	AHR,ARNT,CEBPB,Creb,ESR1,HIF1A,IL1B,JUN,JUND,NFKBIA,NFkB (complex),Pkc(s),RELA,SP1,STAT3,TNF,TP53,tetrachlorodibenzodioxin
mut vs wt d702factor 2x q05		POU4F1	0.226	transcription regulator		0.876		0.005	0.864	0.00731	ADGRG2,CACNB3,CDKN1A,DAB1,KCNMA1,NOVA1,PIEZO2,PLCH2,RTN4RL2,SALL3,SNAP25
mut vs wt d702factor 2x q05		SMAD4	-0.412	transcription regulator		0.877		-0.093	1.257	1.9e-05	APOA2,APOB,BGN,CCND2,CDH2,CDKN1A,COCH,COL2A1,FST,GCNT1,GJA1,IL1B,INPP5D,ITGB7,LEF1,MYCN,PTX3,RGCC,SCD,SLC6A1,SMO,SNAI2,SSTR2,TNC,VEGFA,VIM	AHR,AR,CEBPB,CTNNB1,Creb,EGR1,ERK1/2,FOS,FOXM1,JUN,NFKB1,NFKBIA,NFkB (complex),SMAD2,SMAD3,SMAD4,SMAD7,SP1,STAT3,TCF,TNF
mut vs wt d702factor 2x q05		DNMT3B	-0.723	enzyme		0.88		0.086	0.574	0.000546	AGTR1,CDKN1A,CNR1,CYP1B1,EMILIN2,EPDR1,FOXF2,IFITM1,KDR,MAGEA3/MAGEA6,MAPK4,POU5F1,PTN,RGS4,SFRP4,TNNT2,TNNT3,WNT1	CTNNB1,DNMT3B,FOXM1,JUN,SMAD4,STAT3,TCF
mut vs wt d702factor 2x q05		PTEN	-0.383	phosphatase		0.881		0.007	0.843	0.00753	ADAMDEC1,AKR1C3,ANXA1,AR,CD274,CDH2,CDKN1A,CNN3,CTSV,CXCL10,CXCL13,CXCL2,CXCR6,FES,FGF9,GJA5,GNG2,HAVCR1,IGFBP3,IGFBP6,IL1B,IL6,KDR,LMX1B,MFAP3L,MMP23B,NDRG1,NQO1,PAPPA,POU5F1,PTN,RAMP2,SCD,SFTPC,SLC30A10,SLC46A3,SNAI2,SP4,SPP1,SULF2,SYK,TAF9B,TNFSF10,VEGFA	AKT1,Akt,CEBPB,CTNNB1,EGR1,FOXO1,FOXO3,HDAC1,JUN,MYC,NFKB1,NFkB (complex),NKX3-1,PTEN,SMAD3,SP1,STAT1,STAT3,TP53
mut vs wt d702factor 2x q05		semaxinib		chemical drug		0.882		0.042	0.8	0.00742	CD24,CYP1B1,IL6,KDR,LCN2,TFEB	AKT1,CEBPB,FOXO3,NFkB (complex),SP1,TP53,semaxinib
mut vs wt d702factor 2x q05		helenalin		chemical - endogenous non-mammalian		0.882		0.155	0.578	0.00763	CXCL3,CXCL6,IL6,PRDM1	AHR,CEBPB,CTNNB1,NFKB1,NFKBIA,NFkB (complex),NOD2,RELA,SMAD3,STAT3,helenalin
mut vs wt d702factor 2x q05		proteasome inhibitor PSI		chemical - protease inhibitor		0.882		-0.069	1.019	0.0414	CXCL2,CYP1A1,IL6,SYK
mut vs wt d702factor 2x q05		alitretinoin		chemical drug		0.894		-0.082	1.206	0.00113	ANGPTL3,APOA2,APOD,AR,CASP1,CDKN1A,CXCL10,CXCL13,CYP1A2,CYP2B6,IL6,PLTP,SCD,SLC2A2,SPP1,VIM	CEBPB,CREBBP,IL6,JUN,NCOA2,NFKBIA,NR1H3,NR5A2,NRIP1,PPARG,PPARGC1A,RARA,RARB,RELA,RXRA,SREBF1,STAT1,STAT3,THRB,alitretinoin
mut vs wt d702factor 2x q05		CR1L	0.292	other		0.896		0.172	0.478	0.00244	BGN,COL3A1,COL5A1,COL8A1,IL1B,TNC	Akt,CEBPB,CR1L,EGR1,ERK,FOXO1,JUN,NFKB1,NFkB (complex),P38 MAPK,PPARG,RELA,SMAD3,SP1,STAT3,ZFP36
mut vs wt d702factor 2x q05		N-acetylsphingosine		chemical reagent		0.896		-0.057	1.034	0.0129	CDKN1A,COL3A1,CRYAB,CXCL2,GSTA2,PDE3B
mut vs wt d702factor 2x q05		triptolide		chemical drug		0.896		0.149	0.394	0.0205	ABLIM3,APLN,AR,CADM1,CDKN1A,HPGD,IGFBP3,IL6,KDR,LEF1,NPR1,TNFSF10
mut vs wt d702factor 2x q05		Ro31-8220		chemical - kinase inhibitor		0.899		0.161	0.554	0.0417	CDKN1A,IL1B,IL6,ITGA5,TNFSF10
mut vs wt d702factor 2x q05		MK2 inhibitory peptide		chemical - kinase inhibitor		0.908		0.196	0.517	0.000349	ACTA2,COL3A1,IL1B,LOX	Akt,EGR1,FOXO1,MK2 inhibitory peptide,NFKB1,SMAD3,SP1
mut vs wt d702factor 2x q05		cyclophosphamide		chemical drug		0.912		-0.111	1.22	0.0167	CP,CYP2B6,GPX2,IL1B,IL6,PLA1A,SLC34A2,SPP1
mut vs wt d702factor 2x q05		Focal adhesion kinase		group		0.917		-0.042	1.018	0.00174	CDH2,CDKN1C,DSP,IL6,ITGB2,NEUROG3	Akt,CTNNB1,Creb,EGR1,FOS,FOXO1,FOXO3,Focal adhesion kinase,HIF1A,JUN,MYC,NFKB1,NFKBIA,NFkB (complex),PI3K (complex),PIK3R1,RAC1,RELA,SMAD3,SP1,SRC,STAT3,TP53
mut vs wt d702factor 2x q05		MTA1	-0.065	transcription regulator		0.918		-0.053	1.048	0.00355	CCN4,CCND2,CDKN1C,HUNK,PITX2,RRM2B,WNT1	CTNNB1,FOXM1,Histone h3,JUN,KMT2A,MED1,MTA1,RELA,RNA polymerase II,SMAD4,SP1,STAT3,TCF
mut vs wt d702factor 2x q05		USP19	-0.01	peptidase		0.924		0.013	0.898	0.00308	CXCL10,FBXO32,IL1B,IL6	Histone h3,JUN,KMT2A,MAP3K7,MED1,Map3k7,NFE2L2,NFKB1,NFKBIA,NFkB (complex),PPARG,RELA,RNA polymerase II,SMAD3,SP1,STAT3,USP19
mut vs wt d702factor 2x q05		resveratrol		chemical drug		0.926		0.028	0.799	0.00522	ACTA2,ALOX5,AR,BDNF,CCND2,CDKN1A,CXCL10,CXCL2,CYP1A1,CYP1A2,CYP1B1,IGFBP3,IL1B,IL6,KDR,NQO1,PDK4,SLC2A2,SPP1,TNFRSF11A,TNS1,ULBP2,VDR	AHR,CEBPB,CTNNB1,Creb,ESR1,FOS,HDAC1,JUN,JUND,MYC,NFKB1,NFKBIA,NFkB (complex),Pkc(s),RELA,SP1,STAT3,TNF,TP53,hydrogen peroxide,resveratrol
mut vs wt d702factor 2x q05		ritonavir		chemical drug		0.927		0.006	0.915	0.000374	ABCC2,CCND2,CEACAM5,CRYAB,CYP1A1,CYP2B6,CYP2B7P,FGFBP1,HUNK,IL1B,IL6,NRAD1,SCD,UGT1A1,VEGFA,WT1	AHR,CEBPB,CTNNB1,Creb,ESR1,FOS,FOXA2,FOXM1,HIF1A,JUN,JUND,MYC,NFATC1,NFkB (complex),NR1I2,Pkc(s),RELA,RNA polymerase II,SMAD4,SP1,SRC,STAT3,TCF,TNFSF11,ritonavir
mut vs wt d702factor 2x q05		tazemetostat		chemical drug		0.927		0.055	0.649	0.000519	ADAMTS1,AR,BCL11A,BDNF,BMP5,CCND2,CDH2,CRABP2,FES,FOXC1,GLI3,IL1RAP,INPP5F,LEF1,LOX,MAPK12,METRN,MSI1,NEFL,NQO1,PLCB1,SMO,SPP1,STC2,TIAM1,TNC
mut vs wt d702factor 2x q05		mir-223		microrna		0.927		-0.036	1.054	0.00324	ACTA2,BST1,CCR3,CD274,IL1B,IL6,LEF1,MEF2C,MUC13,NEUROG3,NQO1,S100A9,SERPINB2,SLC2A2	Akt,CTNNB1,EGFR,EGR1,FOXO1,HIF1A,JUN,MYC,NFATC1,NFKB1,NFkB (complex),PPARG,PPARGC1A,RELA,SIRT1,SMAD3,SP1,STAT1,STAT3,mir-223
mut vs wt d702factor 2x q05		TNFAIP6	-0.269	other		0.943		-0.094	1.187	3.37e-05	ACTA2,CDH2,CXCL2,IL1B,IL6,SNAI2,VIM	AHR,CD44,CTNNB1,EP300,IKBKB,JUN,MYC,NFKB1,NFKBIA,NFkB (complex),RELA,SMAD2,SMAD3,STAT1,STAT3,TNFAIP6,TP63,heparan sulfate
mut vs wt d702factor 2x q05		TSH		complex		0.943		-0.099	1.204	0.00683	CDKN1A,FOXE1,IGFBP3,IL6,IVL,KDR,SLC2A1,WNT5A	AKT1,CEBPB,Creb,EGFR,EGR1,FOS,FOXO3,HIF1A,JUN,JUND,LEP,MYC,NFKB1,NFkB (complex),PPARG,RELA,SP1,STAT3,TP53,TSH,cyclic AMP
mut vs wt d702factor 2x q05		glutathione		chemical - endogenous mammalian		0.943		0.007	0.926	0.00748	CA9,CDKN1A,IL1B,IL6,NDRG1,SP4,TNC,VEGFA	AR,Akt,BCL2,CTNNB1,EGR1,FOXO1,GLI1,HIF1A,Hif1,IKBKB,JUN,MYC,NFKB1,NFKBIA,NFkB (complex),PPARG,RELA,SMAD3,SP1,STAT1,STAT3,TP53,TP63,VHL,glutathione
mut vs wt d702factor 2x q05		PPP2CA	-0.01	phosphatase		0.946		-0.109	1.207	0.0136	CASP1,CD70,CDKN1A,CXCL10,CXCL3,NOVA1,NT5E
mut vs wt d702factor 2x q05		fenofibrate		chemical drug		0.951		-0.056	1.164	0.0207	ACSL5,APOA2,APOB,AR,CD200,CDH2,CRP,FBXO32,GPX2,IL6,KDR,MAN1A1,NPPB,PDK4,PLTP,SCD,SLC2A2,TBX1,TIAM1
mut vs wt d702factor 2x q05		SPDEF	-0.027	transcription regulator		0.954		0.128	0.539	3.15e-05	CDH2,CDKN1A,COL16A1,COL5A1,ITGA5,LEF1,PLAUR,SCGB1A1,SNAI2,TNC,VIM,WNT5A	CTNNB1,FN1,FOXM1,FOXO1,FOXO3,JUN,NFkB (complex),NOTCH1,RELA,SMAD3,SMAD4,SP1,SPDEF,STAT3,TCF,Vegf
mut vs wt d702factor 2x q05		ANXA1	-1.404	enzyme		0.954		0.065	0.812	0.00742	ANXA1,CXCL2,IL1B,IL6,ITGB2,TYMP	AHR,ANXA1,CEBPB,CXCL8,IL17A,IL1B,JUN,NFKBIA,NFkB (complex),P38 MAPK,RELA,SMAD3,STAT3,TNF,ZFP36
mut vs wt d702factor 2x q05		mir-24		microrna		0.956		0.032	0.872	0.0104	CDH2,CDKN1A,CXCR6,IL6,KDR,PRDM1,SNAI2
mut vs wt d702factor 2x q05		NOTCH1	0.102	transcription regulator		0.959		-0.025	1.053	0.0056	ACTA2,AKR1C1/AKR1C2,ASB2,CCND2,CDKN1A,CDKN1C,CER1,CHGA,ENO2,HES7,IGFBP3,IL6,IVL,LEF1,LOX,MMP10,MYCN,RGS5,SPP1,VEGFA,WNT5A	Akt,CEBPB,CTNNB1,Creb,EGR1,ERK1/2,FOS,FOXO1,IL6,JUN,LEF1,MYC,NFKB1,NFKBIA,NOTCH1,RBPJ,RELA,RUNX2,SMAD3,SP1,STAT3,TP53
mut vs wt d702factor 2x q05		INHBA	-0.979	growth factor		0.97		-0.103	1.426	2.74e-05	ACTA2,AKR1C3,CCND2,CD24,CDKN1A,EGLN3,FST,IL6,INHA,INHBB,LEFTY1,LOX,NR5A1,PLOD2,POU5F1,PPY,PRDM1,S100A9,SERPINB2,SFTPC,SLC2A2,VEGFA	AHR,CEBPB,CG,CREB1,CTNNB1,Creb,EGR1,ESR2,FOS,FSH,INHBA,JUN,NFKB1,NFkB (complex),P38 MAPK,SMAD3,SMAD4,SMAD7,SP1,STAT3,ZFP36,cyclic AMP
mut vs wt d702factor 2x q05		picrotoxin		chemical toxicant		0.97		-0.162	1.362	0.000105	ADCY4,ADRA1B,ADRA2A,AGTR1,CHRM3,CYP1A1,OPRK1
mut vs wt d702factor 2x q05		SP2509		chemical reagent		0.973		0.055	0.683	7.18e-05	ADAMTS1,AR,BCL11A,BDNF,BMP5,CCND2,CD274,CDH2,CENPF,CRABP2,CXCL10,FES,FOXC1,GLI3,IL1RAP,INPP5F,LEF1,LOX,MAPK12,METRN,MSI1,NEFL,NQO1,PLCB1,SMO,SPP1,STC2,TIAM1,TNC
mut vs wt d702factor 2x q05		HRAS	0.351	enzyme		0.98		-0.059	1.297	8.72e-08	ADRA2A,ALDH1A3,CCND2,CD24,CDKN1A,CGREF1,CHGA,CHST11,COL2A1,COL3A1,CRABP2,CRP,CSTA,CTSV,CXCL10,CYP1A1,EFEMP2,ENPP1,FGFBP1,FKBP6,FSTL1,GAS6,GJA1,IFITM2,IL1B,IL6,ITGA4,ITGA5,IVL,LGALS7/LGALS7B,LIPG,LOXL1,MACROH2A2,MAN1A1,MAPK12,MMP23B,MUC13,MYCN,NID2,NNAT,NPPB,NQO1,OAF,PCYT1B,PLAUR,PLOD2,PLTP,SCD,SERPINB2,SIM2,SLC2A2,SNAI2,SOCS2,SOX5,SPP1,TENM4,TPH1,TYMP,VEGFA,VIM	CEBPB,CTNNB1,Creb,EGR1,ERK1/2,ESR2,FOS,HDAC1,HRAS,JUN,JUND,MYC,NFKB1,NFKBIA,NFkB (complex),PPARG,RELA,RNA polymerase II,SP1,STAT3,TERT,TP53
mut vs wt d702factor 2x q05		INT-767		chemical drug		0.988		-0.065	1.118	0.00623	IL1B,IL6,PCSK1,SLC51B	CEBPB,Creb,EGR1,INT-767,JUN,NFKB1,cyclic AMP
mut vs wt d702factor 2x q05		WWTR1	-0.244	transcription regulator		0.99		-0.086	1.246	1.71e-05	CDKN1A,CXCL2,CXCL3,GJA1,IL1B,IL6,ITGB2,NR5A1,POU5F1,SPP1,UCA1	CTNNB1,NFkB (complex),SMAD2,SMAD3,SMAD4,SP1,WWTR1
mut vs wt d702factor 2x q05		TWIST2	0.737	transcription regulator		0.993		-0.05	1.133	2.39e-05	BCL11A,CD24,CDH2,CDKN1A,H19,IL1B,MYCN,SNAI2,VIM	CTNNB1,JUN,MYC,NFkB (complex),STAT1,STAT3,TWIST2
mut vs wt d702factor 2x q05		benzo(a)pyrene		chemical toxicant		0.996		-0.085	1.356	2.37e-08	ADAMTS16,ANXA1,CDKN1A,COL8A1,CYP1A1,CYP1A2,CYP1B1,DOK5,FGF9,FST,IGFBP6,IL1B,IL1RAP,INHBB,KLF2,NMI,NQO1,NR5A1,NUDT16,PLCB1,PTPRG,RGS5,SFRP4,SFTPC,SNAI2,TACR1,TF,VEGFA,WT1,ZMAT3	AHR,ARNT,CEBPB,CTNNB1,EGF,ERK,FOS,HIF1A,JUN,JUND,MYC,NFkB (complex),P38 MAPK,PPARG,RELA,SMAD3,SP1,STAT3,TP53,ZFP36,benzo(a)pyrene
mut vs wt d702factor 2x q05		RGMB	-0.639	other		1		0.196	0.608	4.6e-05	CXCL2,CXCL3,IL6,LCN2	Gm21596/Hmgb1,LCN2,NFkB (complex),RELA,RGMB,TP53
mut vs wt d702factor 2x q05		pictilisib		chemical drug		1		0.022	0.956	0.000349	LDHA,SLC2A1,TFEB,TNFSF10	AKT1,CEBPB,CTNNB1,FOXO3,JUN,MYC,NFkB (complex),SP1,STAT1,STAT3,TP53,pictilisib
mut vs wt d702factor 2x q05		PROX1	-0.708	transcription regulator		1		-0.008	1.019	0.000654	CDKN1C,FLT4,ITGA9,KDR,RGS4,TNNT3
mut vs wt d702factor 2x q05		icilin		chemical reagent		1		0.196	0.608	0.00124	CXCL10,CXCL2,IL1B,IL6	CTNNB1,Ca2+,Creb,FN1,JUN,NFkB (complex),RELA,SMAD3,SP1,STAT3,TP53,icilin
mut vs wt d702factor 2x q05		PIAS4	0.013	transcription regulator		1		0.136	0.729	0.00233	CXCL2,IL1B,LEF1,PDK4	CEBPB,CTNNB1,FOXO1,HDAC1,HIF1A,IKBKG,JUN,NFKB1,NFKBIA,NFkB (complex),PIAS4,PPARGC1A,RELA,RNA polymerase II,SIRT1,SMAD2,SMAD3,SMAD4,SP1,STAT1,STAT3
mut vs wt d702factor 2x q05		GMNN	-0.336	transcription regulator		1		0.181	0.458	0.00275	APCDD1,CDKN1A,DSP,FRZB,GREB1,PCDH18,PITX2,POU5F1,VEGFA,WNT5A	GMNN,Histone h3,KMT2A,MED1,RELA,RNA polymerase II,SP1
mut vs wt d702factor 2x q05		101.10 peptide		chemical reagent		1		0.196	0.608	0.00396	CRP,GJA1,IL1B,IL6	101.10 peptide,CEBPB,FOS,JUN,JUND,MYC,NFkB (complex),P38 MAPK,SP1,STAT3,TP53,ZFP36
mut vs wt d702factor 2x q05		RARRES2	-1.46	transmembrane receptor		1		-0.022	1.044	0.00763	CCND2,CXCL2,IL1B,IL6	AHR,CEBPB,CTNNB1,CXCL2,Ca2+,Creb,ESR1,ESR2,IL1B,JUN,NFKBIA,NFkB (complex),RARRES2,RELA,SP1,STAT3,TNF,TP53,beta-estradiol
mut vs wt d702factor 2x q05		creatine		chemical - endogenous mammalian		1		0.098	0.804	0.00922	CXCL10,CXCL2,CXCL3,SLC6A8	CEBPB,JUN,NFkB (complex),P38 MAPK,STAT3,ZFP36,creatine
mut vs wt d702factor 2x q05		elovanoid N32		chemical - endogenous mammalian		1		0.196	0.608	0.00922	CDKN1A,IL1B,IL6,VEGFA
mut vs wt d702factor 2x q05		elovanoid N34		chemical - endogenous mammalian		1		0.196	0.608	0.011	CDKN1A,IL1B,IL6,VEGFA
mut vs wt d702factor 2x q05		2,3,4,7,8-pentachlorodibenzofuran		chemical toxicant		1		-0.038	1.091	0.0227	CYP1A1,CYP1A2,CYP1B1,FGF9,NQO1,SERPINA7
mut vs wt d702factor 2x q05		P2RY14	-0.612	g-protein coupled receptor		1		-0.126	1.252	0.0298	GALR1,RASL10B,SLC2A2,SSTR2
mut vs wt d702factor 2x q05		NFIC	-0.213	transcription regulator		1		-0.044	1.087	0.0334	CDKN1A,LEF1,SFTPC,WNT5A
mut vs wt d702factor 2x q05		KL	-0.324	enzyme		1		0.053	0.895	0.0352	ACTA2,IL6,KDR,VDR,VEGFA
mut vs wt d702factor 2x q05		ZNF281	-0.408	transcription regulator		1		0.014	0.972	0.0373	CXCL2,CXCL6,CXCR6,IL6
mut vs wt d702factor 2x q05		calcitriol		chemical drug		1.011		0.012	0.955	0.00219	ALOX5,AR,BATF,CDKN1A,CHGA,CLMN,CXCL10,CXCL2,CXCL3,CXCL6,CYP1A1,CYP2B6,DIRAS3,DOK5,FBN2,FLG,GLRX,HPGD,HSD17B2,IFITM1,IGFBP3,IL1B,IL6,ITGA4,ITGB7,IVL,KRT23,LCN2,OLFML2A,PDK4,PTPRR,RGCC,S100A9,SPP1,TF,TNFAIP3,TNFSF10,TRPV6,VDR,VEGFA,WNT11	AR,CEBPB,EGR1,IL10,IL6,JUN,NFKB1,NFKBIA,NFkB (complex),P38 MAPK,RELA,SIRT1,SP1,STAT3,TNF,ZFP36,calcitriol
mut vs wt d702factor 2x q05		EGLN1	-0.931	enzyme		1.013		0.016	0.97	0.00683	ADAMTS5,COL2A1,EGLN3,IL1B,IL6,PDK1,SLC2A1,VEGFA	AHR,AR,CTNNB1,EGLN1,EP300,EPAS1,HIF1A,Hif1,JUN,KLF2,MYC,NFKB1,NFKBIA,NFkB (complex),PPARG,RELA,RNA polymerase II,SMAD2,SMAD3,SMAD4,SMAD7,STAT3,VHL
mut vs wt d702factor 2x q05		NOG	0.074	growth factor		1.015		0.111	0.797	0.0247	FST,KDR,LEF1,SPP1,VEGFA,WNT5A
mut vs wt d702factor 2x q05		Hedgehog		group		1.026		-0.069	1.206	0.00116	BDNF,CCND2,FOXE1,MYCN,NEUROG3,PGC,SLC2A2,SPP1
mut vs wt d702factor 2x q05		Z-LLL-CHO		chemical - protease inhibitor		1.031		-0.102	1.506	0.0067	ABCG2,AKR1C1/AKR1C2,APOA2,AR,ARHGDIB,CCND2,CDKN1A,CDKN1C,CRP,CRYAB,CXCL10,CXCL2,CYP1A1,DCN,IL1B,IL6,KISS1R,MYCN,NQO1,PRDM1,RGS4,SRY,VDR,VEGFA,ZNF395	AHR,CEBPA,CEBPB,FOS,JUN,NCOA2,NFKB1,NFKBIA,NFkB (complex),P38 MAPK,PPARG,RARA,RARB,RELA,RXRA,SMAD3,STAT3,THRB,Z-LLL-CHO,ZFP36
mut vs wt d702factor 2x q05		gentamicin		chemical drug		1.037		-0.038	1.223	0.00855	ABCC2,AK1,APCS,APOD,CDO1,CFP,CTSV,CXCL10,CYP1A1,GAS6,H4C8,IGFBP3,IL1B,KYNU,LCN2,PTH1R,PTN,PTPRZ1,RGCC,RTN4RL1,SLC2A2,SOCS2,SPP1,TNFRSF11A,UGT8	Histone h3,KMT2A,MED1,RELA,RNA polymerase II,SP1,gentamicin
mut vs wt d702factor 2x q05		miR-30c-5p (and other miRNAs w/seed GUAAACA)		mature microrna		1.037		0.196	0.394	0.0374	BDNF,COL5A1,COL8A1,IL6,LOXL2,NID2,NPR3,NT5E,PLOD2,SYT4,WNT5A
mut vs wt d702factor 2x q05		rotenone		chemical toxicant		1.038		-0.003	1.046	0.0174	CXCL2,GJA1,IL1B,IL6,KDR,PDK1,SRY
mut vs wt d702factor 2x q05		FGF1	0.619	growth factor		1.052		0.035	0.951	0.019	AKR1B10,CCN4,CDKN1A,IL1B,IL6,NDNF,NQO1,SNAI2,SPP1,SSTR2,VEGFA
mut vs wt d702factor 2x q05		PRLR	0.854	transmembrane receptor		1.055		-0.12	1.316	0.0108	AKR1C3,BDNF,CDKN1A,SLC34A2,VDR
mut vs wt d702factor 2x q05		mir-29		microrna		1.062		0.14	0.677	0.0361	ACTA2,AR,BDKRB2,COL3A1,GLDC,MYCN,TNFAIP3,VEGFA
mut vs wt d702factor 2x q05		CX3CL1	0.306	cytokine		1.066		-0.057	1.236	2.4e-05	ADAMTS1,APCDD1,APOD,CDHR1,COL3A1,CRABP2,FRZB,GPNMB,GPRC5B,GRK1,IL1B,IL6,MEIS2,NDNF,SAA2,SLC2A2,SNAP25,SPP1	AHR,BCL2,CX3CL1,Creb,EGR1,ERK1/2,FOS,FOSL1,GLI1,IL1B,JUN,Mapk,NFE2L2,NFKB1,NFKBIA,NFkB (complex),RELA,SP1,STAT3,TP53,prostaglandin E2
mut vs wt d702factor 2x q05		DCN	1.421	other		1.066		0.019	1.008	9.67e-05	BGN,CDKN1A,CDKN1C,CXCL10,FST,IL1B,IL6,SEMA3A,TFEB,VEGFA	AHR,Akt,CTNNB1,DCN,EGR1,FOXO1,IL1B,NFKB1,NFKBIA,NFkB (complex),PDPK1,RELA,SMAD3,SMAD4,SP1,STAT3,TGFBR2,TP53,Tgf beta
mut vs wt d702factor 2x q05		olanzapine		chemical drug		1.066		-0.058	1.24	0.0226	ADGRL3,ANGPTL2,BDNF,CDHR1,GALR1,IL1RAP,KCNMB4,S100A9,SYT4
mut vs wt d702factor 2x q05		CBS/CBSL	0.247	enzyme		1.067		0.084	0.901	0.00233	APOB,CDO1,CLDN5,LOX
mut vs wt d702factor 2x q05		CD70	2.814	cytokine		1.067		-0.022	1.111	0.00501	CCND2,CD70,CXCL10,PRDM1	CD70,CEBPB,Creb,EGR1,ERK1/2,FOS,IL4,Interferon alpha,JUN,NFKB1,NFKBIA,NFkB (complex),P38 MAPK,SP1,STAT1,STAT3,TNF,TP53,ZFP36
mut vs wt d702factor 2x q05		batimastat		chemical - protease inhibitor		1.067		-0.035	1.136	0.00623	CASP1,CXCL3,SLC2A1,VEGFA	Creb,EGR1,ERK,ERK1/2,FOS,IL6R,JUN,NFKB1,NFKBIA,NFkB (complex),PPARG,RELA,SMAD3,SP1,STAT1,STAT3,TGFA,batimastat
mut vs wt d702factor 2x q05		WLS	-0.572	other		1.067		0.009	1.049	0.011	BDNF,CXCL2,FGF9,LEF1
mut vs wt d702factor 2x q05		CCK	0.08	other		1.067		0.028	1.012	0.013	CNR1,CXCL10,IL6,VEGFA
mut vs wt d702factor 2x q05		SULT1E1	1.089	enzyme		1.067		-0.009	1.084	0.0152	APOB,IL6,LCN2,SULF2
mut vs wt d702factor 2x q05		trans-cinnamaldehyde		chemical drug		1.067		-0.125	1.314	0.0152	CASP1,CDKN1A,GPX2,SRXN1
mut vs wt d702factor 2x q05		CYP27B1	-0.129	enzyme		1.067		0.052	0.964	0.0157	CCR3,IL6,SPP1,TRPV6,VDR
mut vs wt d702factor 2x q05		2-aminopurine		chemical reagent		1.067		0.131	0.809	0.0177	CXCL10,CYP2A6 (includes others),IL6,NPPB
mut vs wt d702factor 2x q05		diallyl disulfide		chemical - endogenous non-mammalian		1.067		-0.14	1.345	0.0264	CYP2B6,GJA1,NQO1,NT5E
mut vs wt d702factor 2x q05		IgG		complex		1.068		0.067	0.747	2.95e-06	CCND2,CDKN1A,CLDN5,COL3A1,CRABP2,CXCL10,DSP,EGLN3,FGFBP1,FST,IFITM1,IL1B,IL6,INPP5D,IVL,LCN2,LGALS7/LGALS7B,LY9,PDPN,PLAUR,SERPINB2,SLAMF7,SLC2A3,TNC,TNFAIP3,VEGFA	CEBPB,EGFR,FAS,HIF1A,IgG,JUN,NFKB1,NFKBIA,NFkB (complex),P38 MAPK,RELA,SP1,STAT3,TNF,TP53,ZFP36
mut vs wt d702factor 2x q05		raloxifene		chemical drug		1.069		0	1.069	0.0066	ADIRF,CD24,CDKN1A,CXCL6,CYP1B1,GREB1,H2AC18/H2AC19,IL6,INHBB,KYNU,NDRG1,SLIT2,SPP1,STC1,TM4SF1	AKT1,CEBPB,CTNNB1,Creb,ESR1,ESR2,FOXO3,HDAC1,Hdac,Histone h4,JUN,MED1,NFKBIA,NFkB (complex),PPARG,PTGS2,RARA,RELA,RNA polymerase II,SP1,TERT,TP53,estrogen receptor,raloxifene
mut vs wt d702factor 2x q05		4-methylnitrosoamino-1-(3-pyridinyl)-1-butanone		chemical toxicant		1.07		-0.103	1.339	0.00029	ALOX5,ANXA1,CDKN1A,IL6,LOX,SFTPC,SPP1,TF	4-methylnitrosoamino-1-(3-pyridinyl)-1-butanone,CREBBP,CTNNB1,Creb,EGR1,ERK1/2,ESR2,FOS,FOSL1,JUN,JUND,MYC,Mapk,NCOA2,NFE2L2,NFKB1,SP1,STAT3,TP53
mut vs wt d702factor 2x q05		estrogen		chemical drug		1.074		-0.128	1.654	0.000293	APCS,APOA2,APOB,AR,BDNF,CDKN1A,CKB,COL14A1,COL3A1,COL5A1,FBLN1,GJA1,GREB1,IGFBP6,IL1B,IL6,ITGA5,KDR,LCN2,OPRK1,PTX3,SCGB1A1,SPP1,SSTR2,VDR,VEGFA	AHR,CTNNB1,Creb,ESR1,FOS,HDAC1,IL1B,JUN,JUND,MYC,NFKB1,NFKBIA,NFkB (complex),Pkc(s),RELA,SMAD3,SMAD4,SMAD7,SP1,STAT3,TP53,estrogen
mut vs wt d702factor 2x q05		SMAD2	0.019	transcription regulator		1.074		-0.104	1.357	0.00837	ACTA2,BGN,CDH2,CDKN1A,COL2A1,IL6,INPP5D,POU5F1,PTX3,SNAI2	AHR,BRD7,CTNNB1,HIF1A,JUN,MYC,NFkB (complex),SMAD1,SMAD2,SMAD3,SMAD4,SMAD7,SMARCA4,SP1,STAT1,STAT3,TGFB1,TGFBR1,TP53
mut vs wt d702factor 2x q05		SQSTM1	0.378	transcription regulator		1.079		-0.065	1.269	4.12e-05	CD70,CXCL10,CXCL2,CYP2A6 (includes others),CYP2B6,EGLN3,IL1B,IL6,NQO1,RGCC	AHR,CEBPB,Creb,IL1B,JUN,NFE2L2,NFKB1,NFKBIA,NFkB (complex),P38 MAPK,RELA,SMAD3,SQSTM1,STAT1,STAT3,STING1,ZFP36
mut vs wt d702factor 2x q05		NREP	-0.878	other		1.091		-0.049	1.187	0.00396	ACTA2,COL3A1,ITGA5,VEGFA	JUN,NFKB1,NFkB (complex),NREP,RAC1,RELA,STAT3
mut vs wt d702factor 2x q05		retinol		chemical drug		1.091		-0.14	1.366	0.011	IL6,SAA1,SAA2,TF
mut vs wt d702factor 2x q05		SLC9A3R1	-0.225	other		1.091		-0.121	1.329	0.013	ABCC2,OPRK1,SLC34A2,SNAI2
mut vs wt d702factor 2x q05		branched chain amino acids		chemical drug		1.091		0.117	0.86	0.013	ACTA2,COL3A1,SLC2A2,VEGFA
mut vs wt d702factor 2x q05		resolvin D2		chemical - endogenous mammalian		1.091		0.145	0.807	0.0177	CXCL3,IL1B,IL6,ITGB2
mut vs wt d702factor 2x q05		IFNE	-0.138	cytokine		1.091		-0.176	1.437	0.0352	ANGPTL3,CDKN1A,CXCL10,MX2,SLC2A1
mut vs wt d702factor 2x q05		BCL3	-0.29	transcription regulator		1.1		0.029	1.02	0.00515	CD274,CXCL10,CXCL2,CXCL3,IL1B,IL6,PDK4,PLAUR	AHR,BCL3,CEBPB,Creb,EGR1,ERK1/2,FOS,IFNG,JUN,NFKB1,NFKBIA,NFkB (complex),PPARG,RELA,SMAD3,SP1,STAT1,STAT3
mut vs wt d702factor 2x q05		NFATC2	-0.202	transcription regulator		1.105		-0.088	1.418	0.008	ACP5,BATF,CD274,CDH2,CDKN1A,COL2A1,CRYAB,CXCL10,CXCL2,CXCL3,GPNMB,IL1B,IL6,LDHA,NMI,SH3BP5,SOCS2	CEBPB,IL17A,IL6,JUN,NFATC2,NFKB1,NFKBIA,NFkB (complex),PPARG,RELA,SMAD3,STAT3,TNF
mut vs wt d702factor 2x q05		fluticasone propionate		chemical drug		1.107		-0.007	1.135	0.000444	ABLIM3,ADAMDEC1,ALOX15B,ALOX5,BGN,CRP,CXCL10,CXCL2,DCN,HPGD,IL1B,ITGB7,OLFML2B,OLFML3,PDK4,SERPINB2,SLA,SPP1	CEBPA,CEBPB,FOS,IL4,JUN,NFkB (complex),PPARG,SP1,STAT3,TP53,fluticasone propionate
mut vs wt d702factor 2x q05		TSC1	0.167	other		1.109		-0.003	1.116	0.0255	CASP1,CRYAB,CYP1A2,GLRX,GPX2,IL6,NQO1
mut vs wt d702factor 2x q05		salicylic acid		chemical drug		1.117		0.098	0.928	0.00699	BDNF,BGN,CXCL10,IL1B,IL6,TNFSF10,XCL1	CEBPB,Creb,EGR1,ERK1/2,FOS,JUN,NFKB1,NFKBIA,NFkB (complex),P38 MAPK,PPARG,PTGS2,RELA,SP1,STAT3,TNFRSF1A,TP53,ZFP36,salicylic acid
mut vs wt d702factor 2x q05		FEM1A	0.21	transcription regulator		1.131		0.196	0.744	0.0002	CXCL10,CXCL2,IL1B,IL6	AHR,CEBPB,Ccl2,Creb,EGR1,ERK1/2,FEM1A,FOS,FOSL1,IL1B,JUN,Mapk,NFE2L2,NFKB1,NFKBIA,NFkB (complex),RELA,SP1,STAT3
mut vs wt d702factor 2x q05		PCYT1A	0.261	enzyme		1.131		-0.149	1.426	0.0203	CXCL2,FST,PCYT1B,SCD
mut vs wt d702factor 2x q05		ARHGAP21	-0.45	other		1.134		-0.196	1.652	0.00211	BATF,CD70,CXCL10,CXCL2,NMI,PLA1A,SH3BP5
mut vs wt d702factor 2x q05		DOCK8	0.211	other		1.134		-0.196	1.652	0.0274	CCND2,CD70,CXCL10,IL6,NMI,PLA1A,SH3BP5
mut vs wt d702factor 2x q05		celecoxib		chemical drug		1.14		0.06	0.964	0.00765	ABCG2,ALOX5,AR,CD70,CDKN1A,CENPF,COL3A1,CRP,IL1B,KDR,TNFRSF11A,WNT5A	CEBPB,CTNNB1,Creb,FOS,IL6,JUN,MAPK8,MYC,NFKB1,NFKBIA,NFkB (complex),RELA,SMAD3,SP1,STAT1,STAT3,TNF,aspirin,celecoxib
mut vs wt d702factor 2x q05		methylselenic acid		chemical reagent		1.141		0.057	1.018	0.012	ADAMTS1,AKR1C1/AKR1C2,APOD,AR,CADM1,CDH7,CDKN1A,CDKN1C,CENPF,NAT2,NDRG1,NMI,NQO1,SCD,SH3BP5,SNAI2,TNFAIP3,ULBP2,VEGFA
mut vs wt d702factor 2x q05		streptozocin		chemical drug		1.158		-0.04	1.298	0.0122	ABCG2,APLN,AR,COL3A1,FBXO32,IL1B,IL6,NQO1,NT5E,PDK4,SCD,SLC1A6,SLC2A2,SLC2A3,SPP1,TAT,VEGFA,VIM
mut vs wt d702factor 2x q05		miR-146a-5p (and other miRNAs w/seed GAGAACU)		mature microrna		1.167		0.196	0.533	0.00304	ATOH8,CCR3,CRP,CXCL3,DMBT1,IL1RAP,IL6,NFIX,NLGN1,NOVA1,TMSB15A	NFKB1,NFKBIA,NFkB (complex),PPARG,RELA,STAT3,miR-146a-5p (and other miRNAs w/seed GAGAACU)
mut vs wt d702factor 2x q05		TRIM59	-0.699	enzyme		1.172		0.196	0.738	0.002	CXCL3,CXCL6,IL1B,LCN2,MMP10
mut vs wt d702factor 2x q05		CDX2	-2.548	transcription regulator		1.172		-0.076	1.368	0.0248	CDKN1A,CLDN18,FXYD3,HOXA3,KRT23,LEF1,MYCN,PGC,POU5F1,PRDM1,SOX5,TFEB
mut vs wt d702factor 2x q05		thyroid hormone		chemical - endogenous mammalian		1.177		0.003	1.166	0.0274	ACSL5,ALDOB,BDNF,CDKN1A,DAB1,DIO2,IGFBP3,INHA,NEUROG3,NNAT,PCP4,PCSK1,SEMA5B,VIM
mut vs wt d702factor 2x q05		THBS4	0.488	other		1.177		-0.082	1.338	0.0414	COL2A1,COL3A1,CXCL10,TNC
mut vs wt d702factor 2x q05		MIR17HG	0.03	other		1.183		0.152	0.584	8.42e-05	ACTA2,APCDD1,CD274,CDKN1A,COL5A1,FBN2,HOPX,KLF2,LRP4,MYCN,PITX1,PITX2,RGS5,SMOC1,TNFAIP3,WNT5A
mut vs wt d702factor 2x q05		phenacetin		chemical drug		1.188		-0.177	1.714	5.62e-05	ABCC2,ANXA1,CP,GPX2,LCN2,PLA1A,SLC34A2,SPP1,VIM
mut vs wt d702factor 2x q05		HNF1A	-0.518	transcription regulator		1.193		-0.179	2.034	1.31e-06	ABCC2,ADH1C,AKR1C1/AKR1C2,AKR1C3,ALDOB,ANGPTL3,APCS,APOA2,APOB,CCL28,CDO1,CLDN8,COL3A1,CRP,CYP1A2,DRAIC,FUT11,FXYD3,GCNT3,GPX2,HAL,HAVCR1,HNF1A-AS1,HOPX,HSD17B2,KLF11,LEF1,ONECUT1,PCSK1,PCSK9,PDK1,PKD1L2,PLA1A,PLCB1,PROC,SERPINA7,SLC2A2,TAT,UCA1,UGT1A1,UGT2B11,VNN3,ZBED3,ZNF300,ZNF365
mut vs wt d702factor 2x q05		NFATC1	-0.711	transcription regulator		1.201		-0.153	1.679	0.00187	ACP5,B3GAT1,CCND2,CYP1A1,CYP1B1,IL1B,IL6,NQO1,PRDM1,SLC2A2,SPP1,TNFSF10	CEBPB,FOXO3,IFNG,IL10,IL2,IL4,Ige,JUN,NFATC1,NFATC2,NFKB1,NFKBIA,NFkB (complex),RELA,SP1,STAT1,STAT3,TP53
mut vs wt d702factor 2x q05		TCF4	-0.822	transcription regulator		1.204		-0.058	1.477	0.0243	APCS,CADM1,CASP1,CD24,CDKN1A,CDKN1C,ENPP1,GMPR,HES7,IGFBP3,LEF1,LEFTY1,MEF2C,OCA2,PITX2,PIWIL1,PLAUR,PRDM1,RIPOR2,RSPO2,SH3BP5,SLAMF7,SNAI2,SPP1,TNFSF10,VSIR
mut vs wt d702factor 2x q05		GATA3	-1.067	transcription regulator		1.209		-0.018	1.282	0.00216	BATF,BCL11A,CCR1,CCR3,CDH2,CDKN1A,CHST2,CRABP2,CXCR6,EVPL,FOXE1,GREB1,IL6,LOX,RGCC,S100A9,SLC2A1,VEGFA,VIM,VSIR,WNT11	AR,CEBPB,GATA3,HIF1A,Hif1,IFNG,IL4,IL5,JUN,NFkB (complex),PPARG,SMAD3,SMAD4,SP1,STAT1,STAT3,STAT5A,TP53,Tgf beta,VHL
mut vs wt d702factor 2x q05		IDR-1002		chemical reagent		1.213		0.101	0.992	0.00942	CXCL2,CXCL3,CXCL6,IL6,ITGA5
mut vs wt d702factor 2x q05		minocycline		chemical drug		1.219		0.158	0.842	0.0431	AGTR1,ALOX5,BDNF,CASP1,GJA1,IL1B,IL6
mut vs wt d702factor 2x q05		lipoxin A4		chemical - endogenous mammalian		1.231		0.065	1.086	0.00443	ACTA2,CDKN1A,CYP1A1,GREB1,IL1B,IL6	AHR,ARNT,CEBPB,Creb,ERK,FOS,HIF1A,JUN,JUND,MYC,NFKB1,NFKBIA,NFkB (complex),PPARG,RELA,SMAD3,SP1,STAT3,TP53,lipoxin A4,prostaglandin E2
mut vs wt d702factor 2x q05		indole-3-carbinol		chemical drug		1.231		0.017	1.194	0.0157	ANXA1,CDKN1A,GSTA2,SFTPC,SPP1
mut vs wt d702factor 2x q05		SCD	-1.023	enzyme		1.238		0.054	1.086	0.00467	CXCL10,CXCL3,DIO2,IL1B,IL6,LEF1,PRDM16,SLC2A1	Akt,CXCL2,CXCL3,Ccl2,Creb,EGR1,FOXO1,NFKB1,NFKBIA,NFkB (complex),PIK3R1,RELA,SCD,SMAD3,SP1,STAT3,TP53
mut vs wt d702factor 2x q05		SP600125		chemical - kinase inhibitor		1.24		0.058	0.983	0.0102	AKR1C3,ALOX5,CDKN1A,COL8A1,CXCL10,CXCL2,CXCL3,CYGB,CYP1A1,DDIT4L,H2AC18/H2AC19,IL13RA2,IL1B,IL6,LAPTM5,PTX3,RGS4,SCD,SPP1,TNNT2,VDR,VEGFA
mut vs wt d702factor 2x q05		pregnenolone carbonitrile		chemical drug		1.24		-0.115	1.466	0.0242	ABCC2,CYP2B6,SCD,UGT1A1,UGT1A3
mut vs wt d702factor 2x q05		EWSR1-FLI1		fusion gene/product		1.245		0.123	0.881	0.00693	ADAM2,AK5,CD24,COL3A1,HPGD,LOXL1,PCDH18,SULT1E1,YPEL1
mut vs wt d702factor 2x q05		ETV5	-0.156	transcription regulator		1.248		-0.041	1.384	0.00103	CDH2,HOPX,ITGA5,KRT23,LCN2,LGI3,SCD,SFTPC,SLC34A2,SNAI2,SPP1,VEGFA
mut vs wt d702factor 2x q05		RBPJ	0.153	transcription regulator		1.25		0.083	0.962	9.52e-05	CDKN1A,CER1,CPA1,CRP,FGF11,FGF9,IL1B,IL6,INHA,INHBB,KDR,LEF1,LEFTY1,PRDM1,SLC2A1,TNC,VEGFA,WNT5A	AHR,Akt,EGR1,FOS,FOXO1,IL4,JUN,LEF1,MAPK8,NFKB1,NFkB (complex),NOTCH1,RBPJ,RELA,RUNX2,SMAD3,SMAD4,SMAD7,SP1,STAT3,TP53
mut vs wt d702factor 2x q05		TET2	-0.308	enzyme		1.257		-0.078	1.524	0.0078	CHST11,CXCL6,FOXC1,HAL,IL1B,IL6,ITGB2,JAML,KLF2,SLC26A9,SLC6A8,TNNT2,ZFP42
mut vs wt d702factor 2x q05		AMPK		complex		1.261		-0.016	1.305	0.0136	AR,CCND2,CDKN1A,CXCL10,CYP2B6,FBXO32,GJA1,IL6,SLC2A1,SLC6A8,VIM
mut vs wt d702factor 2x q05		MSR1	-3.335	transmembrane receptor		1.264		0.024	1.211	0.00127	CXCL10,CXCL2,CXCL3,IL1B,IL6	BCL3,CSF2,HDAC3,IFNB1,JUN,MSR1,NFE2L2,NFKB1,NFKBIA,NFkB (complex),PPARG,RELA,SMAD3,SP1,SREBF1,STAT1,STAT3,TP53,cholesterol
mut vs wt d702factor 2x q05		CHADL	0.097	other		1.265		0.034	1.158	1.81e-07	CADM1,CDKN1A,COL2A1,CRYAB,IGFBP3,IL6,KLF2,MEF2C,PTH1R,PTX3
mut vs wt d702factor 2x q05		SAMSN1	-0.216	other		1.265		-0.174	1.816	0.00537	BATF,CCND2,CD70,CXCL10,CXCL2,IL6,NMI,PLA1A,RGCC,SH3BP5	IL4,JUN,NFkB (complex),SAMSN1,SP1,STAT3,TP53
mut vs wt d702factor 2x q05		nitric oxide		chemical - endogenous mammalian		1.274		-0.072	1.478	0.0415	AGTR1,AR,CDKN1A,CXCL10,DPYSL3,IL1B,IL6,NDRG1,NQO1,SPP1,VEGFA,WT1
mut vs wt d702factor 2x q05		JUND	-0.208	transcription regulator		1.292		-0.098	1.506	0.000632	AGTR1,BDNF,CSTA,CXCL10,HPGD,IL6,IVL,PLAUR,SERPINB2,SPP1,VEGFA	CEBPB,CREB1,FOS,IFNG,IL10,IL4,JUN,JUNB,JUND,MYC,NFKB1,NFKBIA,NFkB (complex),RELA,SMAD3,SP1,STAT1,STAT3,TP53
mut vs wt d702factor 2x q05		obeticholic acid		chemical drug		1.294		0.03	1.209	0.00076	ABCC2,ACTA2,CXCL2,CXCL3,IL1B,IL6,PCSK1,SLC51B	AHR,CEBPB,IL10,JUN,NFKB1,NFKBIA,NFkB (complex),PPARG,RELA,SMAD3,STAT3,TNF,obeticholic acid
mut vs wt d702factor 2x q05		carvedilol		chemical drug		1.296		0.134	1.003	0.00301	ACTA2,COL3A1,IL1B,IL6,NPR3	AHR,CEBPB,Creb,EGFR,EGR1,ERK,ERK1/2,FOS,HIF1A,JUN,NFKB1,NFkB (complex),PPARG,RELA,SMAD3,SMAD4,SMAD7,SP1,STAT3,carvedilol,cyclic AMP
mut vs wt d702factor 2x q05		silibinin		chemical drug		1.309		0.141	0.92	0.0114	CDH2,CDKN1A,IGFBP3,IL6,PLAUR,SNAI2,VEGFA,VIM
mut vs wt d702factor 2x q05		apigenin		chemical - endogenous non-mammalian		1.309		0.134	0.959	0.0251	APLN,AR,CCND2,CDKN1A,CXCL3,CYP1A1,IL1B,IL6
mut vs wt d702factor 2x q05		MIR124		group		1.313		0.138	0.989	0.00333	AR,IL1B,IL6,NES,SNAI2,VIM	CTNNB1,FOXO1,JUN,MIR124,MYC,NFATC1,NFATC4,NFkB (complex),STAT1,STAT3
mut vs wt d702factor 2x q05		let-7a-5p (and other miRNAs w/seed GAGGUAG)		mature microrna		1.326		0.196	0.467	0.000141	ACTA2,BDNF,CASP1,CCND2,CDH2,COL3A1,COL5A1,COL8A1,DSP,ITGA4,LOXL2,MARS2,NID2,PLOD2,PRDM1,SCD,TAF9B,UGT8,VIM,WNT1	CEBPB,IL6,JUN,NFKBIA,RELA,STAT3,let-7a-5p (and other miRNAs w/seed GAGGUAG)
mut vs wt d702factor 2x q05		CLEC10A	0.092	other		1.342		0.196	0.904	0.000135	CRP,CXCL2,CXCL6,IL1B,IL6
mut vs wt d702factor 2x q05		verteporfin		chemical drug		1.342		0.196	0.904	0.000135	CDKN1A,COL3A1,CXCL2,IL6,VIM	CTNNB1,Gm21596/Hmgb1,JUN,MYC,NFATC2,NFE2L2,NFkB (complex),PARP1,STAT1,STAT3,TP53,verteporfin
mut vs wt d702factor 2x q05		chelerythrine		chemical drug		1.342		0.147	1.013	0.00301	CHGA,CXCL3,IL6,NPPB,VEGFA	AHR,FOS,FOSL1,ITGB2,JUN,JUND,MYC,Mapk,NFE2L2,NFKB1,NFKBIA,NFkB (complex),PPARG,RELA,SMAD3,SP1,STAT1,STAT3,TP53,chelerythrine
mut vs wt d702factor 2x q05		miR-335-3p (miRNAs w/seed UUUUCAU)		mature microrna		1.342		0.196	0.904	0.00605	COL5A1,COL8A1,LOXL2,NID2,PLOD2
mut vs wt d702factor 2x q05		fucoidin		chemical reagent		1.342		0.094	1.131	0.00818	CDKN1A,IL1B,IL6,NPPB,TNFSF10	CEBPB,FN1,FOS,FOSL1,IL1,JUN,MAPK8,Mapk,NFE2L2,NFKB1,NFKBIA,NFkB (complex),P38 MAPK,RELA,SMAD3,SP1,STAT3,ZFP36,fucoidin
mut vs wt d702factor 2x q05		HOXC6	-0.779	transcription regulator		1.342		-0.073	1.504	0.00836	CASP1,CHRNA2,CYRIA,DCN,IGFBP3,ZBTB7C
mut vs wt d702factor 2x q05		SAHM1		chemical reagent		1.342		0.196	0.904	0.0322	CD300A,ELMO1,P4HA1,PDK1,ZBED3
mut vs wt d702factor 2x q05		berberine		chemical drug		1.348		0.061	1.177	0.0191	CDKN1A,CLDN5,CYP1A1,CYP1A2,CYP2B6,IL1B,IL6,PCSK9,VEGFA,VIM
mut vs wt d702factor 2x q05		rifampin		chemical drug		1.35		-0.142	1.807	1.47e-06	ABCC2,AGTR1,AKR1C1/AKR1C2,CD24,CEACAM5,CRYAB,CXCL10,CYP1A1,CYP1A2,CYP2A6 (includes others),CYP2B6,CYP2B7P,CYP4B1,GPRC5B,GSTA2,HUNK,IL1B,NRAD1,SPP1,UGT1A1,WT1	FOS,FOSL1,FOXA2,FOXO1,HDAC1,Hdac,Histone h4,JUN,MED1,Mapk,NFE2L2,NFKB1,NR1I2,PPARD,PPARG,PPARGC1A,RELA,RXRA,SIRT1,rifampin
mut vs wt d702factor 2x q05		Sn50 peptide		chemical toxicant		1.357		0.152	0.888	0.000354	CRP,CXCL10,CXCL2,GJA1,IL1B,IL6,LIPG,STC1,TNFSF10,TYMP	AHR,CEBPB,JUN,NFKB1,NFKBIA,NFkB (complex),PPARG,RELA,SMAD3,STAT3,Sn50 peptide,TNF,TP53
mut vs wt d702factor 2x q05		PRKAA		group		1.36		0.043	1.267	0.0452	AR,CDKN1A,CXCL10,IL6,VIM
mut vs wt d702factor 2x q05		INSIG1	-0.421	other		1.364		0.188	0.782	0.00447	CXCL10,CXCL13,CXCL2,CXCL3,CXCL6,IL6,LCN2,LIPG,S100A9,SCD,SLC2A2	FOXO3,INSIG1,NFE2L2,NFkB (complex),NR5A2,PPARG,PPARGC1A,RELA,SREBF1,STAT3,cholesterol
mut vs wt d702factor 2x q05		CCND1	0.229	transcription regulator		1.373		-0.028	1.461	0.0499	ALDH1A3,AR,CCND2,CDKN1A,CENPF,CTNNA2,H4C8,MC4R,MEIS2,MNS1,MYRIP,NT5E,PCYT1B,PDLIM4,SLC4A4,SPP1,TIAM1,TMSB15A,TUBB1,TYMP,ZFP28
mut vs wt d702factor 2x q05		cholecalciferol		chemical - endogenous mammalian		1.375		-0.108	1.775	4.15e-05	ALOX5,BDNF,CD300A,CDA,CXCL10,GAS7,IGFBP3,ITGB2,PTH1R,PTPRB,SLC2A14,SPP1,SULF2,TNFSF10,VDR,WT1	CEBPA,CEBPB,Creb,EGR1,EP300,ERK1/2,FOS,HDAC1,Histone h3,JUN,KMT2A,MED1,NFKB1,NFkB (complex),P38 MAPK,PPARG,RELA,RNA polymerase II,SMAD3,SP1,STAT3,TP53,ZFP36,cholecalciferol
mut vs wt d702factor 2x q05		HDL		complex		1.377		0.068	1.215	0.0291	AGTR1,EGLN3,IL1B,IL6,ITGB2,KLF2
mut vs wt d702factor 2x q05		mir-150		microrna		1.382		0.087	1.188	0.0352	ACTA2,CLDN5,CXCL2,MIAT,SLC2A1
mut vs wt d702factor 2x q05		PDLIM2	-0.329	other		1.387		0.012	1.342	0.000174	BST1,FSTL1,FXYD6,GNG2,IGFBP3,KYNU,NPR3,PCSK1N,SCARA3,SMOC1,STC2,TNS1,ZNF300
mut vs wt d702factor 2x q05		valproic acid		chemical drug		1.387		-0.01	1.433	0.000824	AKR1C3,AR,BDNF,CCND2,CCR1,CDKN1A,CDKN1C,CH25H,COCH,CYP1A1,CYP1B1,CYP2A6 (includes others),CYP2B6,DPP10,FOXC1,GREB1,HAPLN1,IL6,MAMLD1,MYCN,NES,NEUROG3,NQO1,PLTP,POU5F1,PTX3,SCD,SPP1,SSTR2,THSD4,TNFSF10,TNS1,UGT1A1,ULBP2,WNT1,WNT5A	Akt,CTNNB1,EGR1,ESR1,ESR2,FOS,FOXM1,FOXO1,HDAC1,JUN,JUND,MYC,NFKB1,NFkB (complex),SMAD3,SMAD4,SP1,STAT3,TCF,TP53,beta-estradiol,valproic acid
mut vs wt d702factor 2x q05		PPP1R13L	-0.003	transcription regulator		1.387		-0.059	1.517	0.00127	CCND2,CDKN1A,DSP,GJA1,SLC2A1	Akt,CTNNB1,EGR1,FOXO1,FOXO3,HDAC1,JUN,MYC,NFKB1,NFKBIA,NFkB (complex),PI3K (complex),PPARG,PPP1R13L,RELA,SMAD3,SP1,STAT3,TP53
mut vs wt d702factor 2x q05		DNASE2	-0.147	enzyme		1.387		0.196	0.952	0.00286	CH25H,CP,CXCL10,CXCL2,GPNMB,TNFSF10
mut vs wt d702factor 2x q05		indican		chemical - endogenous mammalian		1.387		-0.03	1.454	0.00818	CA9,CDKN1A,EGLN3,IL1B,SLC2A1	Akt,CITED2,CTNNB1,EGR1,EP300,ERK,FOXO1,HDAC1,HIF1A,JUN,MYC,NFKB1,NFkB (complex),PPARG,RELA,SMAD3,SP1,STAT1,STAT3,TFAP2C,TP53,indican
mut vs wt d702factor 2x q05		MAP2K7	0.038	kinase		1.387		-0.075	1.554	0.0339	CDKN1A,CSTA,CXCL10,GJA1,IVL,VDR
mut vs wt d702factor 2x q05		IL37	1.163	cytokine		1.394		0.147	1.074	0.00301	CXCL10,CXCL2,CXCL3,IL1B,IL6	CEBPB,CREB1,CXCL2,ICAM1,IL10,IL17A,IL1A,IL37,NFKB1,NFKBIA,NFkB (complex),NOTCH1,RELA,SMAD3,STAT3
mut vs wt d702factor 2x q05		emodin		chemical drug		1.396		0.123	1.081	3.42e-05	AR,CCR1,CDKN1A,CLDN5,CXCL10,CXCL3,CYP1A1,CYP1B1,IL1B,IL6,VIM	AHR,CEBPB,EGR1,FOS,JUN,JUND,MYC,NFKB1,NFKBIA,NFkB (complex),P38 MAPK,PPARG,RELA,RXRA,SMAD3,SP1,STAT3,TP53,ZFP36,emodin,troglitazone
mut vs wt d702factor 2x q05		ADA	1.032	enzyme		1.4		0.179	1.005	0.00605	CXCL2,CXCL3,IL6,SPP1,VEGFA	ADA,CTNNB1,Ca2+,Creb,JUN,NFKBIA,NFkB (complex),PRKCA,RELA,SP1,TP53,TP73
mut vs wt d702factor 2x q05		IL11RA	0.227	transmembrane receptor		1.4		-0.09	1.599	0.0173	ACTA2,CXCL3,IL6,MMP10,SAA1,VEGFA
mut vs wt d702factor 2x q05		cigarette smoke		chemical toxicant		1.404		-0.112	1.829	5.19e-06	ACTA2,AKR1B10,CDKN1A,CHRM2,CHRM3,CKB,CXCL10,CXCL2,CXCL3,CYP1A1,CYP1A2,CYP1B1,CYP2B6,FLG,GPX2,H19,IFITM1,IL1B,IL6,KDR,NQO1,PTPRB,RAMP2,SLC2A1,SOCS2,UGT1A3,VEGFA,WNT5A	AHR,C3,CCN1,CEBPB,CTNNB1,Creb,IL1B,IL6,JUN,NFE2L2,NFKB1,NFKBIA,NFkB (complex),RELA,SMAD3,STAT3,cigarette smoke
mut vs wt d702factor 2x q05		miR-223-3p (miRNAs w/seed GUCAGUU)		mature microrna		1.406		0.196	0.977	0.00435	MEF2C,NEUROG3,SCN3A,SLC2A2,VIM
mut vs wt d702factor 2x q05		STAU1	-0.067	transporter		1.408		0.02	1.361	0.000137	EGLN3,FLG,KLF2,MEF2C,PFKFB4,SLC2A3
mut vs wt d702factor 2x q05		SOX3		transcription regulator		1.414		0.175	0.918	0.00209	APCDD1,DSP,FRZB,GREB1,LMX1B,NR5A1,PCDH18,PITX2,VEGFA,WNT5A
mut vs wt d702factor 2x q05		meclizine		chemical drug		1.414		-0.196	1.691	0.00233	ABCC2,CYP1A2,CYP2B6,UGT1A1	CEBPA,NR1I3,meclizine
mut vs wt d702factor 2x q05		SOX1	-0.477	transcription regulator		1.414		0.196	0.86	0.0123	APCDD1,DSP,FRZB,GREB1,PCDH18,PITX2,VEGFA,WNT5A
mut vs wt d702factor 2x q05		triamcinolone acetonide		chemical drug		1.42		-0.005	1.439	0.0175	B3GNT6,BMP5,IGFBP3,MT1F,MXRA5,OCA2,PCDH19,RGCC,SAA1,SCD,SLC31A2,SOCS2,SPP1,STC2,TAT,UGT8
mut vs wt d702factor 2x q05		AG490		chemical - kinase inhibitor		1.431		0.157	0.861	3.84e-05	ACTA2,AKR1C3,CD24,CDKN1A,CXCL2,DUOX2,HPGD,IL13RA2,IL1B,IL6,SAA1,SPP1,TNFSF10,VEGFA	AG490,Akt,CTNNB1,Creb,EGR1,FOXO1,IL4,JUN,MMP9,MYC,NFKB1,NFKBIA,NFkB (complex),PPARG,RELA,SMAD3,SP1,STAT1,STAT3,TP53
mut vs wt d702factor 2x q05		Stat3-Stat3		complex		1.432		-0.196	1.865	0.0108	APCS,CDKN1A,CRP,VEGFA,WNT5A
mut vs wt d702factor 2x q05		ibuprofen		chemical drug		1.432		0.076	1.264	0.0322	DCN,IL1B,IL6,SLC2A1,VEGFA
mut vs wt d702factor 2x q05		miR-141-3p (and other miRNAs w/seed AACACUG)		mature microrna		1.434		0.196	0.823	0.00127	AKR1C1/AKR1C2,BST1,CDH2,CYP1B1,FOXF2,LEF1,PITX1,PITX2,TBX1,VIM
mut vs wt d702factor 2x q05		TFRC	0.125	transporter		1.437		0.141	0.929	1.78e-05	ACTA2,CD300A,CDKN1A,ERO1A,GAS7,ITGB2,LDHA,PTN,SLC2A1,SLC2A14,SRXN1,STC2,SULF2,TNFSF10
mut vs wt d702factor 2x q05		glutamine		chemical - endogenous mammalian		1.455		0.06	1.279	0.016	ACTA2,AKR1C1/AKR1C2,CDKN1A,IL6,NES,POU5F1,SNAI2,VEGFA,VIM,WT1
mut vs wt d702factor 2x q05		TP53	-0.028	transcription regulator		1.458		-0.024	1.68	0.00115	ABCC2,ABCG2,ACTA2,AGTR1,AK1,ALDH1A3,ALOX5,ANKH,ANXA1,APOBEC2,AR,BDKRB2,BDNF,CA9,CASP1,CCND2,CD70,CDH10,CDKN1A,CENPF,CGREF1,CKB,CLCA2,CNN3,COL14A1,COL2A1,COL3A1,CP,CRYAB,CTSF,CXCL10,CXCL3,CXCR6,CYP1A1,DDIT4L,DELEC1,DINOL,EDA2R,F5,FGFBP1,FKBP6,FSTL1,FXYD3,GAS6,GAS7,GJA1,GLRX,H19,HYAL1,IGFBP3,IGFBP7,IL1B,IL6,INKA2,ITGB1BP2,ITGB7,KCNJ2,KCNMA1,KDR,KIFC1,LDHA,LOC105377329,LOX,MACROH2A2,MAPK12,MAPK4,MFA…	AHR,CEBPB,CREBBP,EGR1,EP300,ERBB2,FOS,HDAC1,HIF1A,IL1B,JUN,JUND,MYC,NFKB1,NFKBIA,NFkB (complex),RELA,SMAD3,SP1,STAT3,TNF,TP53
mut vs wt d702factor 2x q05		beta-naphthoflavone		chemical toxicant		1.464		-0.091	1.756	7.95e-06	AKR1C1/AKR1C2,CRP,CYP1A1,CYP1A2,CYP1B1,CYP2W1,CYP4B1,NQO1,SAA1,SOCS2,UGT1A1	9,10-dimethyl-1,2-benzanthracene,AHR,ARNT,CEBPB,Creb,EP300,HIF1A,JUN,NFE2L2,NFKB1,NFkB (complex),RELA,SMAD3,SP1,STAT1,STAT3,TP53,benzo(a)pyrene,beta-naphthoflavone
mut vs wt d702factor 2x q05		ethanol		chemical - endogenous mammalian		1.474		-0.059	1.749	0.041	ACTA2,ADH1C,ALDH1A3,ALOX15B,ALOX5,BDNF,CDKN1A,CGAS,CNR1,COL3A1,CRP,CXCL3,CYP2A6 (includes others),CYP2B6,GREM2,IL1B,IL6,NMI,NQO1,PCSK9,RGCC,SCD,SLC2A2,SRXN1,TAT
mut vs wt d702factor 2x q05		medroxyprogesterone acetate		chemical drug		1.479		0.022	1.397	0.000144	ADAMTS1,BDNF,CDKN1C,CENPF,CFAP97D2,CXCL10,CYP1A1,DCN,FMOD,IGFBP7,IL1B,IL6,ITGB2,SCD,TNC,TRIM55,VEGFA,WNT5A	Akt,CEBPB,CTNNB1,EGR1,ESR1,ESR2,FOS,FOXO1,IL6,JUN,JUND,MYC,NFATC1,NFKB1,NFKBIA,PPARG,PPARGC1A,RELA,SIRT1,SMAD3,SP1,STAT3,TP53,beta-estradiol,medroxyprogesterone acetate
mut vs wt d702factor 2x q05		TCF3	-0.4	transcription regulator		1.496		-0.048	1.663	0.0304	ASB2,CCND2,CDKN1A,CGREF1,CPA1,CTSV,CXCR6,ENPP1,IL1B,INSM1,ITGA4,ITGB7,KLF2,LEF1,MEF2C,MYCN,PRDM1,RIPOR2,SLAMF7,SULT1A3/SULT1A4,TF,TMEFF1,TOX,VSIR
mut vs wt d702factor 2x q05		KRAS	-0.361	enzyme		1.499		-0.007	1.532	4.43e-06	ADGRL3,AKR1B10,ALDOC,BGN,CASP1,CD274,CDH2,CDKN1A,COL3A1,CRYAB,CXCL10,CXCL6,DCLK1,ERO1A,FAH,FES,FSTL1,FUT11,FXYD3,GCNT1,GCNT3,GJA1,HOPX,IFITM1,IFITM2,IL1B,IL6,INSM1,ITGB2,LCN2,LDHA,LEF1,LGI3,LIPG,LOX,MAPK12,MMP10,MX2,MYCN,NQO1,NT5E,PDE4B,PDPN,PLA1A,SCD,SERPINB2,SFTPC,SLC27A6,SLC2A1,SLC34A2,SLC6A14,SNAI2,SPP1,ST3GAL2,TNC,TNFSF10,UGT8,UNC5B,VEGFA,VIM,WT1	AKT1,Akt,CEBPB,CTNNB1,EGFR,EGR1,ERBB2,FOXO1,FOXO3,HIF1A,JUN,KRAS,MYC,NFKB1,NFkB (complex),RELA,SMAD3,SP1,STAT1,STAT3,TP53
mut vs wt d702factor 2x q05		linoleic acid		chemical - endogenous mammalian		1.499		-0.071	1.694	0.00343	APOB,IL1B,IL6,KDR,NPPB,S100A9,SCD,SNAI2,VEGFA	ABCA1,CTNNB1,Ca2+,Creb,EGR1,JUN,NCOA2,NFKB1,NFKBIA,NFkB (complex),NR1H3,PPARD,PPARG,RARA,RARB,RXRA,SP1,STAT1,STAT3,THRB,TP53,VEGFA,linoleic acid
mut vs wt d702factor 2x q05		SIRT3	-0.012	enzyme		1.504		0.065	1.29	2.05e-05	ACTA2,DIO2,IL1B,IL6,NES,PDK1,SCD,SLC2A1,SLC2A2,VEGFA,VIM	AHR,Akt,CASP1,CEBPB,EGR1,FOXO1,IL1B,JUN,JUNB,NFKB1,NFKBIA,NFkB (complex),PYCARD,RAF1,RELA,SIRT3,SMAD2,SMAD3,SP1,STAT3,TP53
mut vs wt d702factor 2x q05		PPARGC1A	0.753	transcription regulator		1.506		-0.045	1.784	1.24e-08	ADAMTS1,ADAMTS5,AK1,APOD,CCN4,CDKN1A,COL2A1,CXCL10,CYP1A1,CYP1A2,CYP2A6 (includes others),CYP2B6,DCN,DIO2,EMILIN2,FBLN1,FBXO32,FREM1,GAS6,HAPLN1,IGFBP3,IGFBP6,IGFBP7,IL1RAP,IL6,INHA,INHBB,LDHA,NR5A1,OLFML3,PDK4,PODN,PTN,SCD,SEMA3A,SERPINA7,STC1,SYT2,TNFSF10,UGT1A1,VEGFA	Akt,CEBPB,EGR1,FOXO1,HDAC1,HIF1A,IL6,JUN,NFATC1,NFKB1,NFKBIA,NFkB (complex),NR1H3,PPARD,PPARG,PPARGC1A,RELA,RNA polymerase II,RXRA,SIRT1,SMAD3,SP1,STAT3
mut vs wt d702factor 2x q05		LDB1	-0.297	transcription regulator		1.508		0.003	1.489	1.76e-05	ACOX2,ANXA1,BCL11A,CASP1,CCND2,CDKN1A,CER1,CGAS,EFEMP2,EGLN3,ENO2,FBLN1,FES,FRZB,GJA1,GPRC5B,HLX,IL1RAP,ITGB7,KLF11,LEF1,LEFTY1,MEF2C,NDRG1,NOVA1,NT5E,TNFAIP3,VDR,ZMAT3
mut vs wt d702factor 2x q05		IRAK3	0.58	kinase		1.509		-0.02	1.565	2.05e-05	ACTA2,CD274,CXCL2,CXCL3,IL6,INPP5D,TNFAIP3,VIM	CEBPB,IL6,IRAK3,JUN,MYD88,NFKB1,NFKBIA,NFkB (complex),PPARG,RELA,STAT1,STAT3,TNF,TP53
mut vs wt d702factor 2x q05		PXR ligand-PXR-Retinoic acid-RXRŒ±		complex		1.521		-0.187	2.038	0.000407	ABCC2,CYP1A2,CYP2A6 (includes others),CYP2B6,GSTA2,SCD,SLCO1A2,UGT1A1
mut vs wt d702factor 2x q05		15-deoxy-delta-12,14 -PGJ 2		chemical - endogenous mammalian		1.532		0.064	1.284	0.00587	ACTA2,AGTR1,CCND2,CD200,CDKN1A,CXCL10,CXCL13,CXCL2,IL1B,IL6,KDR,NQO1,P4HA1,SCGB1A1,SPP1,VEGFA	15-deoxy-delta-12,14 -PGJ 2,CEBPB,CHUK,CTNNB1,FOS,FOXO1,FOXO3,IL10,JUN,JUND,MYC,NFKB1,NFKBIA,NFkB (complex),PI3K (complex),RELA,SMAD3,SP1,STAT3,TNF,TP53
mut vs wt d702factor 2x q05		thalidomide		chemical drug		1.546		0.163	1.155	0.00508	IL1B,IL6,KCNMA1,KDR,PLAUR,VEGFA	AHR,CASP1,CTNNB1,Creb,EGR1,ERK1/2,FGF2,FOS,HIF1A,JUN,JUNB,MYC,NFKB1,NFKBIA,NFkB (complex),PYCARD,SMAD3,SP1,STAT1,STAT3,TP53,TXN,thalidomide
mut vs wt d702factor 2x q05		diclofenac		chemical drug		1.558		0.012	1.532	0.0157	CDKN1A,CRP,HPGD,IL6,VEGFA
mut vs wt d702factor 2x q05		iron		chemical - endogenous mammalian		1.561		-0.028	1.629	0.0268	CCND2,CDKN1A,IL6,LCN2,NDRG1,TF
mut vs wt d702factor 2x q05		isotretinoin		biologic drug		1.564		-0.131	2.043	5.21e-07	AGTR1,ALDH1A3,ATP12A,CDKN1A,CRABP2,CYP1B1,CYP2B7P,HPGD,IGFBP3,IL6,IVL,LCN2,S100A9,SLC6A14,TNFSF10	Akt,CEBPB,CREBBP,CTNNB1,Creb,EGF,EGR1,ESR2,FOXO1,JUN,MMP9,NCOA2,NFKB1,NFkB (complex),PPARG,RARA,RARB,RELA,RXRA,SMAD3,SP1,STAT3,THRB,TP53,isotretinoin
mut vs wt d702factor 2x q05		zinc		chemical drug		1.568		0.021	1.519	0.0251	AKR1B10,BDNF,IL1B,IL6,PDE4B,SCD,SERPINB2,SLC39A4
mut vs wt d702factor 2x q05		heparin		chemical - endogenous mammalian		1.569		-0.06	1.709	0.0155	ACTA2,APOB,IGFBP3,IL6,PAPPA,SLC2A1,VEGFA,VIM
mut vs wt d702factor 2x q05		TP63	-0.336	transcription regulator		1.577		-0.088	2.091	2.41e-05	ACTA2,ADAMTS1,ALDH1A3,BDKRB2,CCND2,CDH2,CDKN1A,CDKN1C,COL5A1,CSTA,CYGB,CYP2A6 (includes others),FST,GCNT3,GPNMB,GPX2,IGFBP3,IGFBP6,IGFBP7,IL1B,IL1RAP,IL6,INSM1,ITGA4,IVL,MMP10,NT5E,SERPINB2,SLC2A3,SLIT2,SNAI2,SRD5A1,TNC,TNFSF10,TUBB2B,UGT1A1,ULBP2,VDR,VEGFA,VIM,WNT5A	AR,Akt,CTNNB1,EGR1,FOS,FOXO1,HIF1A,Hdac,Hif1,JUN,JUND,MYC,NFKB1,NFkB (complex),PPARG,SMAD3,SP1,STAT1,STAT3,TP53,TP63,TP73,VHL,WT1
mut vs wt d702factor 2x q05		miR-34a-5p (and other miRNAs w/seed GGCAGUG)		mature microrna		1.588		0.196	0.95	0.0271	CACHD1,CDKN1A,IFITM2,MYCN,PLCB1,POU5F1,PREX2,SCN3A,TSPOAP1,VEGFA,WNT1
mut vs wt d702factor 2x q05		AHR	-0.207	ligand-dependent nuclear receptor		1.598		-0.027	1.769	4.3e-14	A4GALT,ABCG2,ACTA2,ADAMTS5,AHRR,ALOX5,ATOH8,CDH2,CDKN1A,CGREF1,CHST2,COL14A1,COL16A1,COL3A1,COL5A1,CRP,CXCL10,CYP1A1,CYP1A2,CYP1B1,CYP2A6 (includes others),CYP2B6,DCN,EGLN3,EMILIN2,FBN2,FGF9,GAS6,HUNK,IDO2,IL1B,IL6,ITGA5,KLF2,LDHA,NID2,NNMT,NQO1,NT5E,PDE4B,POU5F1,SAA1,SCD,SEMA3A,SERPINA7,SERPINB2,SIM1,SLC2A1,SNAI2,SPP1,UGT1A1,VEGFA,VIM	AHR,CEBPB,EGFR,HIF1A,IL1B,IL6,JUN,KLF6,NFKB1,NFKBIA,NFkB (complex),RELA,SMAD3,SMAD4,SP1,STAT3,TGFB1,TP53
mut vs wt d702factor 2x q05		IL10RA	-0.756	transmembrane receptor		1.601		-0.006	1.632	0.00405	ADH1C,ALDOB,ALOX5,ANKH,CACHD1,COL14A1,DCN,ERO1A,FSTL1,GAS6,GBP6,GPR171,GSDMC,HPGD,IL1B,IL6,ITGB7,LCN2,NPL,SLC16A3,SLC2A1,TFEC,TINAG,VSIG2	IL10,IL10RA,JUN,NFKB1,NFKBIA,NFkB (complex),RELA,SMAD3,STAT1,STAT3
mut vs wt d702factor 2x q05		3-methylcholanthrene		chemical toxicant		1.602		-0.169	2.007	0.0291	CYP1A1,CYP1A2,CYP1B1,IL1B,NQO1,UGT1A1
mut vs wt d702factor 2x q05		lactacystin		chemical - protease inhibitor		1.604		-0.08	1.89	0.0463	AKR1C1/AKR1C2,APOB,ARHGDIB,CCND2,CCRL2,CD24,CDKN1A,CRYAB,CYP1A1,GJA1,IL6,MYCN,SYK,VDR
mut vs wt d702factor 2x q05		lenalidomide		chemical drug		1.608		-0.047	1.801	0.0187	AFAP1-AS1,CARD16,CASP1,GABRB2,GAS6-DT,H2BC8,H3C4,KCNMA1,LEF1,LRRC4C,NMI,PDK1,PLOD2,TET1,VIM,WDR72,WNT1,WNT11
mut vs wt d702factor 2x q05		lithium chloride		chemical drug		1.609		-0.105	1.917	0.0376	AR,CDKN1A,DCN,HAPLN1,HES7,LEF1,NES,POU5F1,PTX3,TNFSF10
mut vs wt d702factor 2x q05		miR-338-3p (miRNAs w/seed CCAGCAU)		mature microrna		1.633		0.196	1.153	0.00385	COL5A1,COL8A1,LOXL2,NID2,PLOD2,VIM
mut vs wt d702factor 2x q05		HBB	-0.452	transporter		1.633		0.185	1.181	0.00937	CXCL10,CXCL2,CXCL3,CXCL6,IL1B,IL6	CEBPB,HBB,IL6,JUN,NFKB1,NFKBIA,NFkB (complex),RELA,STAT1,STAT3,TNFSF12
mut vs wt d702factor 2x q05		ACE2	0.127	peptidase		1.655		0.016	1.617	8.09e-05	ACTA2,CXCL10,CXCL2,CXCL3,CXCL6,IL1B,IL6	ACE2,AGT,ALB,CTNNB1,CXCL8,HIF1A,JUN,MYC,NFKB1,NFKBIA,NFkB (complex),RELA,SMAD3,SQSTM1,STAT1,STAT3,TP53
mut vs wt d702factor 2x q05		IL11	0.281	cytokine		1.664		-0.047	1.779	0.0136	ACTA2,COL2A1,CRP,IL1B,IL6,SPP1,WNT5A
mut vs wt d702factor 2x q05		RGS4	-1.79	enzyme		1.667		-0.044	1.799	0.0177	CPLX2,KDR,MFAP3L,NEFL,NTNG1,PAPPA,SIM1,SPP1,VDR
mut vs wt d702factor 2x q05		benzene		chemical toxicant		1.673		-0.02	1.722	0.0365	ACVR1C,CDKN1A,COL3A1,IGFBP3,PROC,PTH1R
mut vs wt d702factor 2x q05		4-hydroxytamoxifen		chemical drug		1.686		-0.1	2.136	3.74e-05	ANGPTL2,CCL15,CDKN1A,CHST2,COL16A1,CYP1A1,CYP1B1,GLRX,IGFBP3,IL6,MT1F,PDK4,RAI2,S100A9,SLC2A1,SNAI2,SPAG4,TM4SF1,TMOD1,TNFAIP3,VDR	4-hydroxytamoxifen,AHR,ARNT,Ahr-aryl hydrocarbon-Arnt,CEBPB,EGFR,ESR1,ESR2,FOS,HIF1A,JUN,NCOA2,NFKB1,NRIP1,PPARGC1A,RARA,RELA,SP1,STAT3,TP53,estrogen receptor
mut vs wt d702factor 2x q05		ZMPSTE24	0.382	peptidase		1.691		0.098	1.435	0.00276	CDKN1A,CTSV,CXCL2,CXCL3,IGFBP3,IL6,SOCS2	CEBPB,CXCL2,HDAC1,Hdac,Histone h4,IKBKG,IL6,JUN,MED1,NFKB1,NFKBIA,NFkB (complex),RELA,STAT1,STAT3,TNF,ZMPSTE24
mut vs wt d702factor 2x q05		ilomastat		chemical drug		1.698		0.028	1.63	0.00032	ACTA2,CXCL10,CXCL3,IL1B,IL6,NPPB	ACE2,CEBPB,Creb,EGR1,ERK1/2,FOS,Gm21596/Hmgb1,JUN,MAP2K6,NFATC2,NFE2L2,NFKB1,NFkB (complex),P38 MAPK,PARP1,RELA,SP1,STAT3,TP53,TP73,ZFP36,ilomastat
[truncated: 1,287 more rows]

## Sheet: Causal Networks
Causal Networks for My Projects->20200928 Brad Johnson->mut vs wt d702factor 2x q05
[truncated: 1,754 more rows]

## Sheet: Diseases and Biofunctions
Diseases and Bio Functions for My Projects->20200928 Brad Johnson->mut vs wt d702factor 2x q05
Categories	Functions	Diseases or Functions Annotation	p-Value	Predicted Activation State	Activation z-score	Notes	Bias-corrected z-score	Molecules	# Molecules
[truncated: 500 more rows]

## Sheet: Tox Functions
Tox Functions for My Projects->20200928 Brad Johnson->mut vs wt d702factor 2x q05
[truncated: 530 more rows]

## Sheet: Regulator Effects
Regulator Effects for My Projects->20200928 Brad Johnson->mut vs wt d702factor 2x q05
[truncated: 29 more rows]

[truncated: 3 more sheets: Networks, Tox Lists, My Pathways]
