# Supplementary material for: GSK3 inhibition rescues growth and telomere dysfunction in dyskeratosis congenita iPSC-derived type II alveolar epithelial cells
Source: eLife. 2022 May 13;11:e64430. doi: 10.7554/eLife.64430 (PMC9200405; doi:10.7554/eLife.64430)
Supplement: Supplementary file 3. — These tables display selected results from gene set enrichment analysis (GSEA) and ingenuity pathway analyses (IPAs) that highlight pathways found to be differentially regulated in mutant iAT2 cells at D70 when compared with wild type cells. The first table displays GSEA results along with the pathway name, normalized enrichment score, and adjusted p-value (D70 p-adj). The second table displays IPA results from the canonical pathways analysis. These are gene sets that are differentially regulated in mutant iAT2 cells at D70 when compared with wild type cells. The p-value reports the significance of enrichment of the molecules in that gene set, and the activation score reports how concordant the gene expression changes are with what is predicted from the literature embedded in IPA (a negative z-score argues that the gene set is down regulated in the mutant iAT2 cells, whereas a positive z-score argues that the gene set is upregulated in mutant iAT2 cells; the lack of a z-score is indicative there was insufficient evidence to provide a z-score.) The ‘molecules’ column lists the genes that were in that gene set that were also found in our differentially expressed gene list when comparing mutant iAT2 cells to wildtype cells. [file elife-64430-supp3.xlsx]

## Sheet: Pathways in IPF
Gene Set	Day 70 NES	Day 70 p-adj
HALLMARK_UNFOLDED_PROTEIN_RESPONSE	1.64586	0.00191962
HALLMARK_P53_PATHWAY	1.9667	7.30523e-09
HALLMARK_REACTIVE_OXYGEN_SPECIES_PATHWAY	2.04306	1.55092e-05
WONG_MITOCHONDRIA_GENE_MODULE	2.72095	3.22966e-09
MOOTHA_MITOCHONDRIA	2.67476	3.22966e-09
REACTOME_MITOCHONDRIAL_TRANSLATION	2.66	3.22966e-09
REACTOME_TP53_REGULATES_METABOLIC_GENES	2.24184	3.22966e-09
KARLSSON_TGFB1_TARGETS_UP	1.91249	9.30012e-06
REACTOME_PINK_PARKIN_MEDIATED_MITOPHAGY	1.86508	0.00383871
Ingenuity Canonical Pathways	-log(p-value)	zScore	Ratio	Molecules
HIF1Œ± Signaling	1.92	-2	0.078	ADRA1B,CDKN1A,EGLN3,FLT4,IL6,KDR,LDHA,MMP10,MMP23B,SLC2A1,SLC2A14,SLC2A2,SLC2A3,TF,VEGFA,VIM
tRNA Splicing	2.74	-1.88982	0.163	ENPP6,PDE10A,PDE3A,PDE3B,PDE4B,PDE8B,PLD6
Adrenomedullin signaling pathway	2.43	-1.80739	0.0863	ADCY2,ADCY4,GNA15,GUCY1A2,IL1B,KCNQ2,MAPK11,MAPK12,MAPK4,MYLK2,NPR1,NPR3,PLCB1,PLCH2,RAMP2,SHF,TFAP2A
Hepatic Fibrosis Signaling Pathway	2.2	-1.56893	0.0707	ACTA2,ACVR1C,AGTR1,CNR1,COL2A1,COL3A1,DIRAS3,FLT4,GLI3,IL1B,IL1RAP,ITGA4,ITGA5,KDR,LEF1,MAPK11,MAPK12,MYLK2,PDK1,SMO,SPP1,TF,VEGFA,WNT1,WNT11,WNT5A
cAMP-mediated signaling	3.64	-1.2792	0.0965	ADCY2,ADCY4,ADRA2A,AGTR1,CHRM2,CHRM3,CNR1,ENPP6,GRM4,HTR1E,MC4R,NPR3,OPRK1,PDE10A,PDE3A,PDE3B,PDE4B,PDE8B,PLD6,PTH1R,RGS4,VIPR1
LPS/IL-1 Mediated Inhibition of RXR Function	3.34	-1.13389	0.0938	ABCC2,ACOX2,ACSL5,ALDH1A3,CHST11,CHST2,CHST4,CYP2A6 (includes others),CYP2B6,GSTA2,HS3ST6,IL1B,IL1RAP,PLTP,SLC27A6,SLCO1A2,SULT1A1,SULT1A2,SULT1A3/SULT1A4,SULT1C4,SULT1E1
STAT3 Pathway	1.26	-1.13389	0.0741	CDKN1A,FLT4,IL13RA2,IL1B,KDR,MAPK11,MAPK12,SOCS2,TNFRSF11A,VEGFA
Wnt/Ca+ pathway	0.589	-1	0.0645	PLCB1,PLCH2,SMO,WNT5A
Osteoarthritis Pathway	4.13	-0.942809	0.104	ADAMTS5,ANKH,CASP1,CCN4,COL2A1,CTNNA2,DCN,FRZB,GLI3,H19,IL1B,IL1RAP,ITGA4,ITGA5,LEF1,MEF2C,MMP10,PTH1R,S100A9,SMO,SPP1,VEGFA
Relaxin Signaling	3.28	-0.707107	0.107	ADCY2,ADCY4,ENPP6,GNA15,GNG2,GUCY1A2,NPR1,NPR3,PDE10A,PDE3A,PDE3B,PDE4B,PDE8B,PLD6,RLN3,VEGFA
Leukocyte Extravasation Signaling	1.16	-0.333333	0.066	ACTA2,CLDN18,CLDN5,CLDN8,CTNNA2,CTNNA3,ITGA4,ITGA5,ITGB2,MAPK11,MAPK12,MMP10,MMP23B
HOTAIR Regulatory Pathway	1.15	0.301511	0.0688	AR,CDKN1A,LEF1,MMP10,MMP23B,SNAI2,SPP1,VIM,WNT1,WNT11,WNT5A
Thyroid Hormone Metabolism II (via Conjugation and/or Degradation)	4.7	0.333333	0.237	DIO2,LARGE1,SULT1A1,SULT1A2,SULT1A3/SULT1A4,SULT1C4,UGT1A1,UGT1A3,UGT2B11
BMP signaling pathway	1.2	0.447214	0.0824	BMP5,CHRD,FST,MAPK11,MAPK12,PITX2,SOSTDC1
Senescence Pathway	0.324	0.57735	0.0436	ACVR1C,CDKN1A,CGAS,DELEC1,IL6,MAPK12,MAPK4,PDK1,PDK4,SAA1,SAA2,SAA4
Chondroitin Sulfate Biosynthesis	4.03	0.632456	0.179	B3GAT1,CHST11,CHST2,CHST4,HS3ST6,SULT1A1,SULT1A2,SULT1A3/SULT1A4,SULT1C4,SULT1E1
Dermatan Sulfate Biosynthesis	3.84	0.632456	0.169	B3GAT1,CHST11,CHST2,CHST4,HS3ST6,SULT1A1,SULT1A2,SULT1A3/SULT1A4,SULT1C4,SULT1E1
PCP pathway	1.92	1.13389	0.117	CTHRC1,MAPK12,RSPO3,SMO,WNT1,WNT11,WNT5A
Heparan Sulfate Biosynthesis	4.06	1.1547	0.154	B3GAT1,CHST11,CHST2,CHST4,EXTL1,HS3ST6,PLA1A,SULT1A1,SULT1A2,SULT1A3/SULT1A4,SULT1C4,SULT1E1
Wnt/Œ≤-catenin Signaling	1.54	1.50756	0.0751	ACVR1C,CDH2,FRZB,GJA1,LEF1,POU5F1,SFRP4,SMO,SOX21,SOX5,WNT1,WNT11,WNT5A
Melatonin Degradation I	6.91	2.13809	0.233	CYP1A1,CYP1A2,CYP1B1,CYP2A6 (includes others),CYP2B6,CYP4B1,LARGE1,SULT1A1,SULT1A2,SULT1A3/SULT1A4,SULT1C4,UGT1A1,UGT1A3,UGT2B11
VDR/RXR Activation	2.3	2.23607	0.115	CDKN1A,CXCL10,HSD17B2,IGFBP3,IGFBP6,SPP1,TRPV6,VDR,WT1
LXR/RXR Activation	3.82	2.67261	0.124	A1BG,APOA2,APOB,APOD,IL1B,IL1RAP,IL6,PLTP,PON3,SAA1,SAA2,SAA4,SCD,TF,UGT1A3
G-Protein Coupled Receptor Signaling	4.54		0.0993	ADCY2,ADCY4,ADRA1B,ADRA2A,AGTR1,AVPR1A,CHRM2,CHRM3,CNR1,ENPP6,GNA15,GRM4,HTR1E,HTR2C,MC4R,NPR3,OPRK1,PDE10A,PDE3A,PDE3B,PDE4B,PDE8B,PLCB1,PLD6,PTH1R,RGS4,VIPR1
Agranulocyte Adhesion and Diapedesis	3.33		0.0984	ACTA2,CCL15,CCL28,CLDN18,CLDN5,CLDN8,CXCL10,CXCL13,CXCL2,CXCL3,CXCL6,IL1B,ITGA4,ITGA5,ITGB2,ITGB7,MMP10,MMP23B,XCL1
Granulocyte Adhesion and Diapedesis	3.27		0.1	CCL15,CCL28,CLDN18,CLDN5,CLDN8,CXCL10,CXCL13,CXCL2,CXCL3,CXCL6,IL1B,IL1RAP,ITGA4,ITGA5,ITGB2,MMP10,MMP23B,XCL1
FXR/RXR Activation	3.11		0.111	A1BG,ABCC2,APOA2,APOB,APOD,IL1B,MAPK12,PLTP,PON3,SAA1,SAA2,SAA4,SLC51B,TF
Hepatic Fibrosis / Hepatic Stellate Cell Activation	2.69		0.0914	ACTA2,AGTR1,COL16A1,COL19A1,COL2A1,COL3A1,COL5A1,COL8A1,COL9A2,CXCL3,FLT4,IGFBP3,IL1B,IL1RAP,IL6,KDR,VEGFA
PXR/RXR Activation	2.27		0.123	ABCC2,CYP1A2,CYP2A6 (includes others),CYP2B6,GSTA2,IL6,SCD,UGT1A1
TR/RXR Activation	2.09		0.107	AKR1C1/AKR1C2,AKR1C3,DIO2,NRGN,NXPH2,PDE3B,SLC16A3,SLC2A1,SYT2
Gap Junction Signaling	2.06		0.0808	ACTA2,ADCY2,ADCY4,GJA1,GJA5,GJC1,GUCY1A2,HTR2C,NPR1,NPR3,PLCB1,PLCH2,TUBA3E,TUBB1,TUBB2B,TUBB8
Airway Pathology in Chronic Obstructive Pulmonary Disease	1.99		0.0932	APOD,CD70,CXCL3,FGF11,FGF9,IL1B,IL6,LCN15,LCN2,PAEP,TNFSF10
Caveolar-mediated Endocytosis Signaling	1.97		0.11	ACTA2,FLNC,ITGA4,ITGA5,ITGA8,ITGA9,ITGB2,ITGB7
Remodeling of Epithelial Adherens Junctions	1.2		0.0882	ACTA2,CTNNA2,TUBA3E,TUBB1,TUBB2B,TUBB8
