# Supplementary figures and images for: GSK3 inhibition rescues growth and telomere dysfunction in dyskeratosis congenita iPSC-derived type II alveolar epithelial cells
Source: eLife journal article supplement (doi:10.7554/elife.64430), 2022-05-13

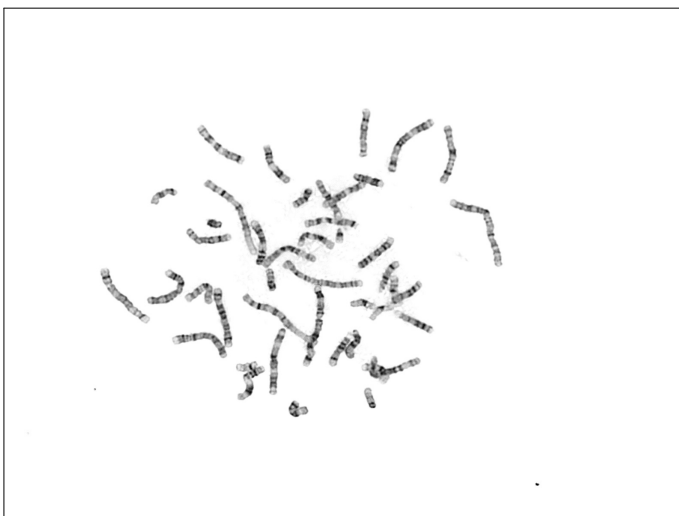

Result: 46,XY

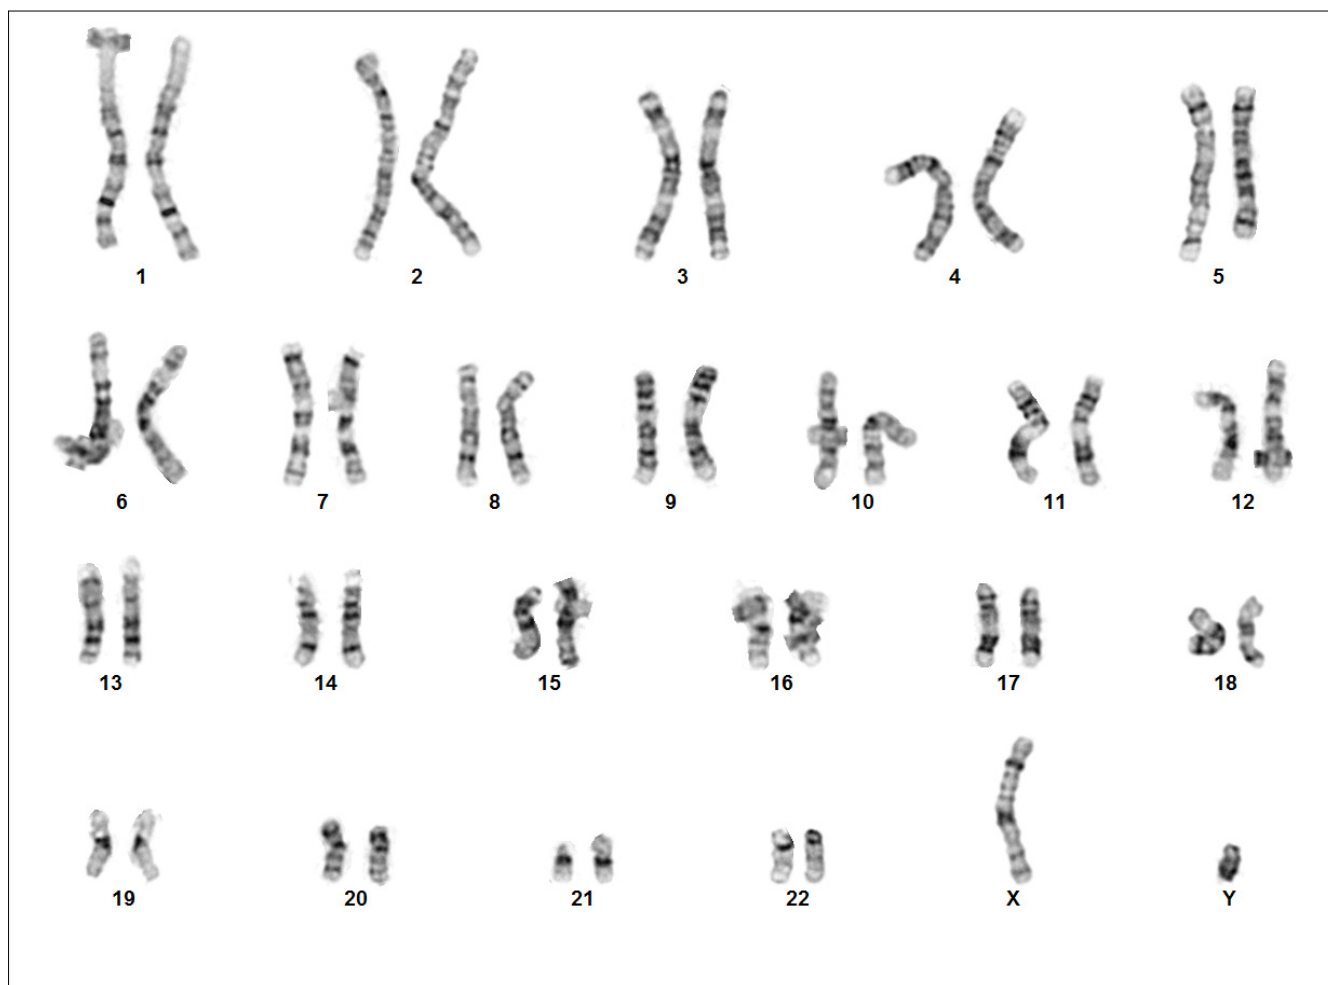

Supplement: fig1-figsupp1-data1 [file elife-64430-fig1-figsupp1-data1-v2.zip]

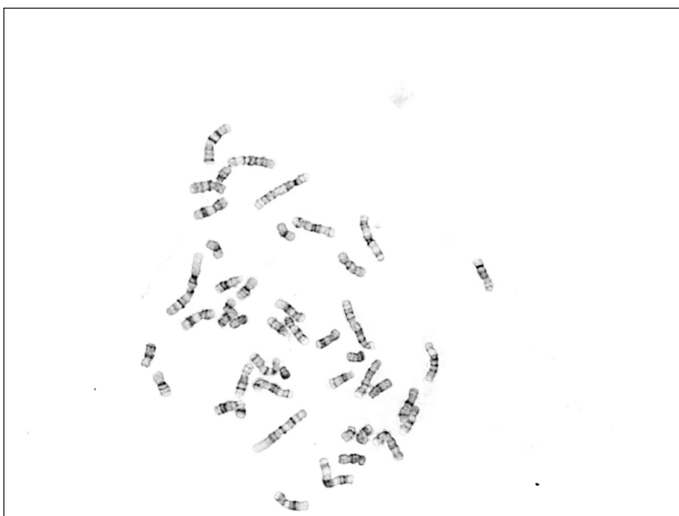

Result: 46,XY

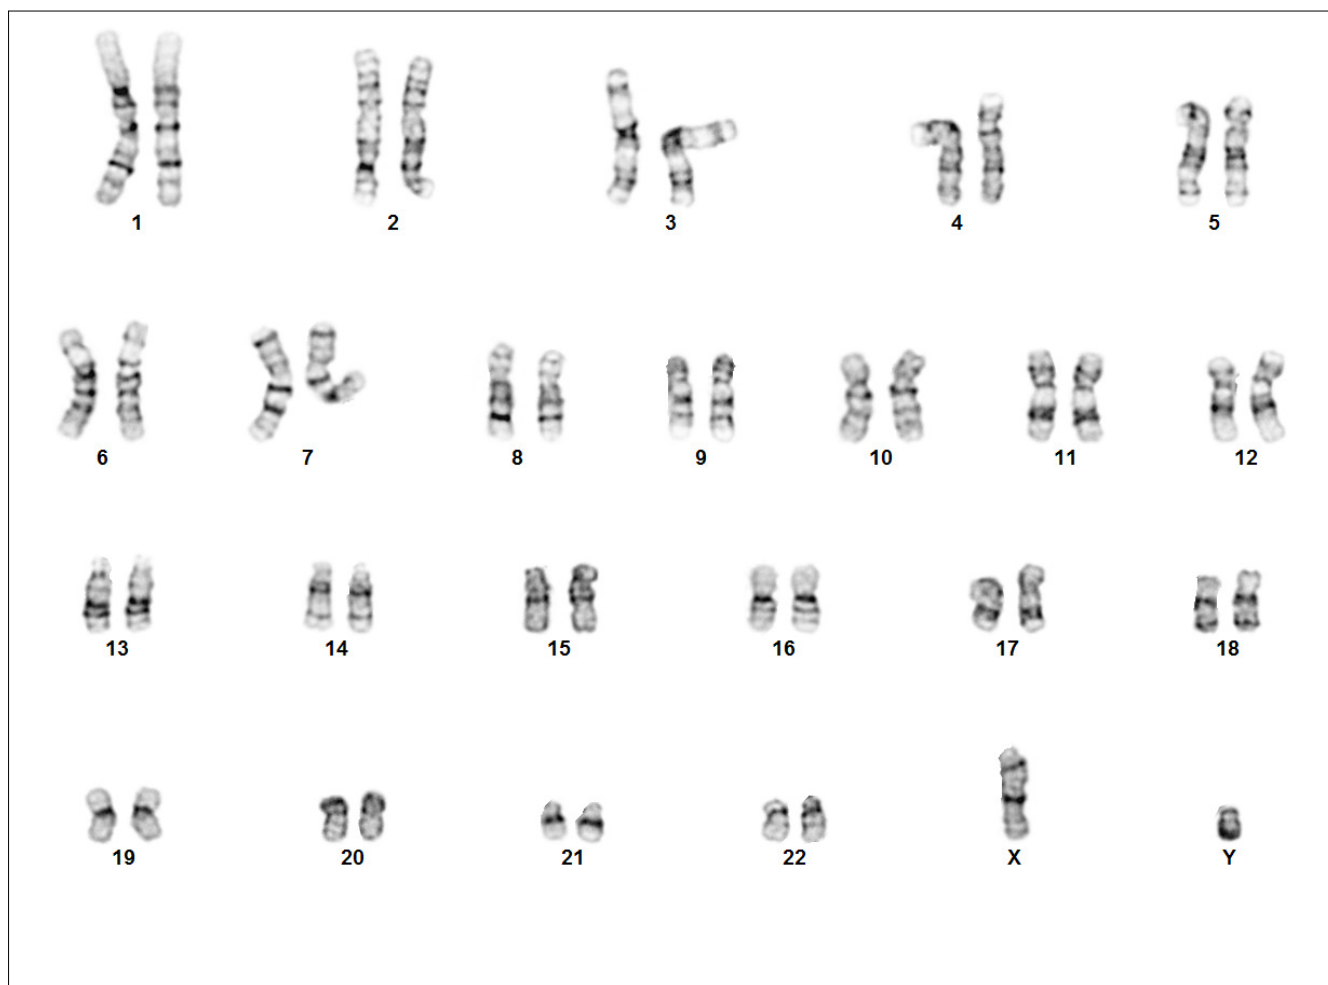

Supplement: fig1-figsupp1-data1 [file elife-64430-fig1-figsupp1-data1-v2.zip]

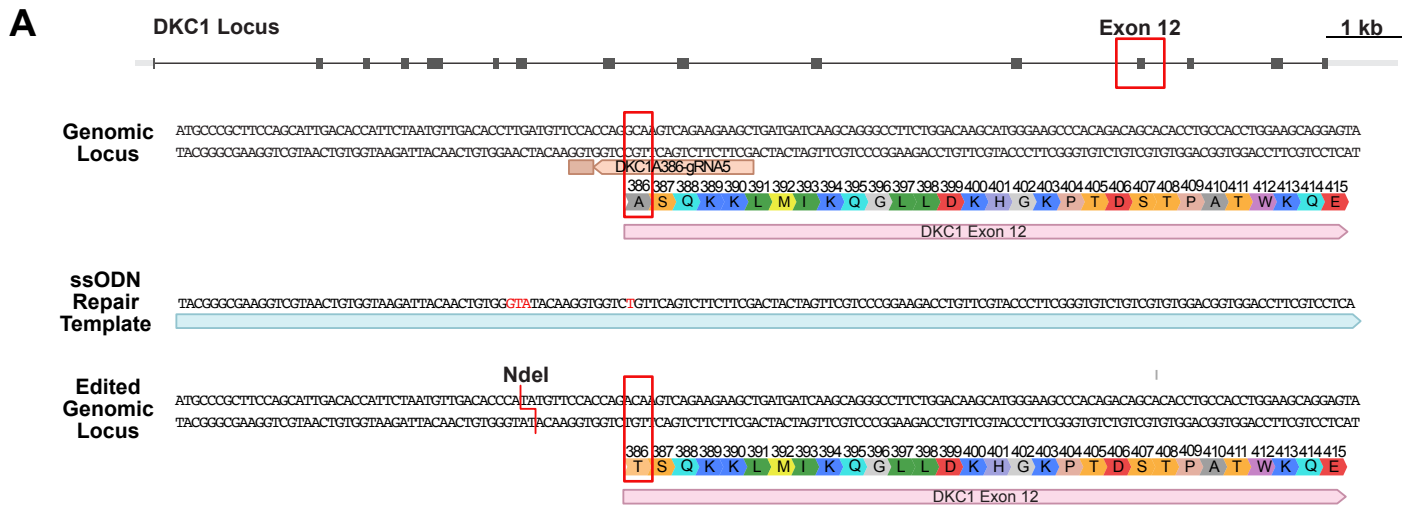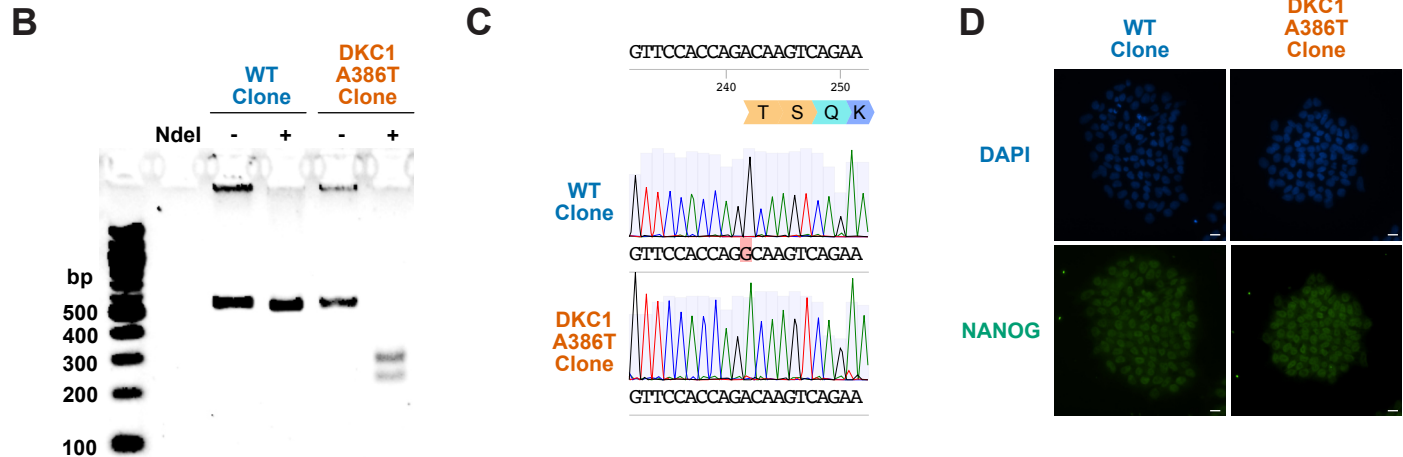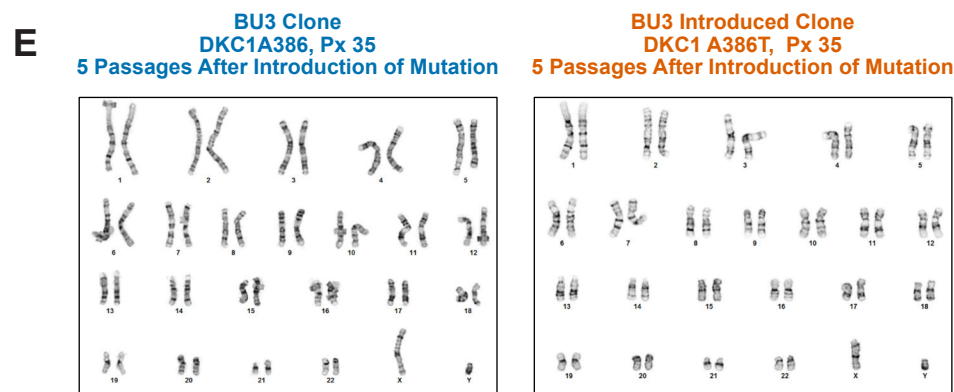

Supplement: supp [file elife_poa_e64430_Figure_1_figure_supplement_1.pdf › elife_poa_e64430_Figure_1_figure_supplement_1.pdf]

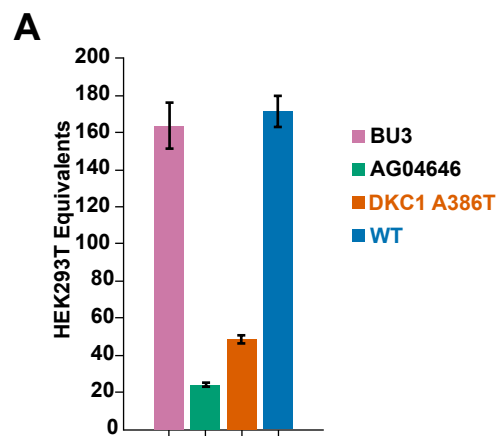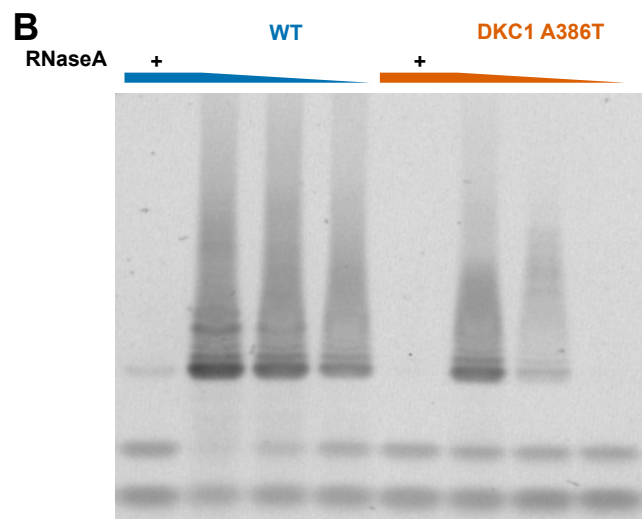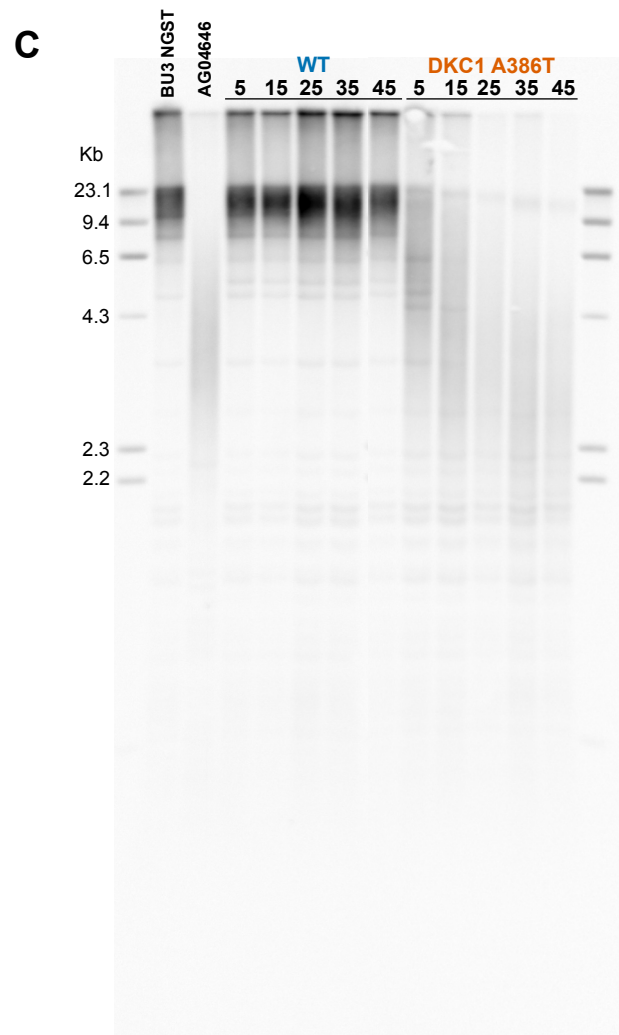

Supplement: supp [file elife_poa_e64430_Figure_1_figure_supplement_2.pdf › elife_poa_e64430_Figure_1_figure_supplement_2.pdf]

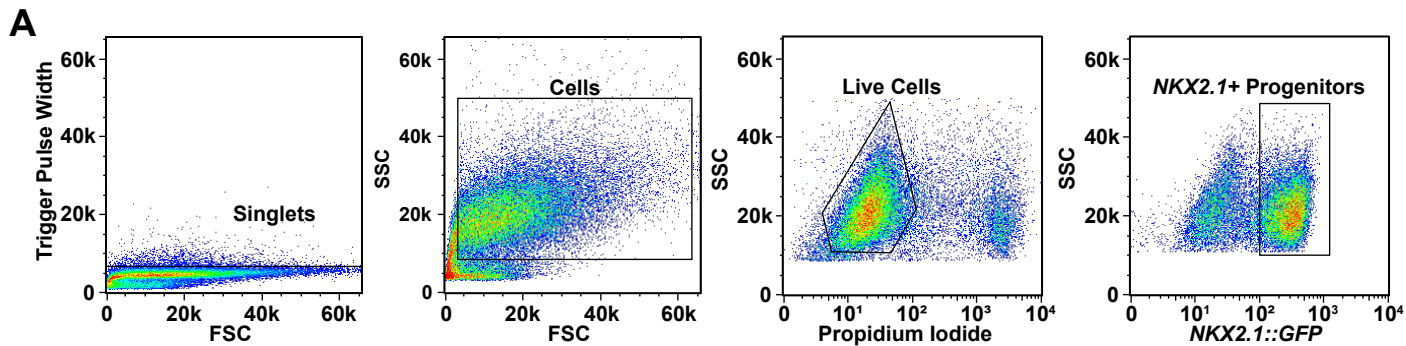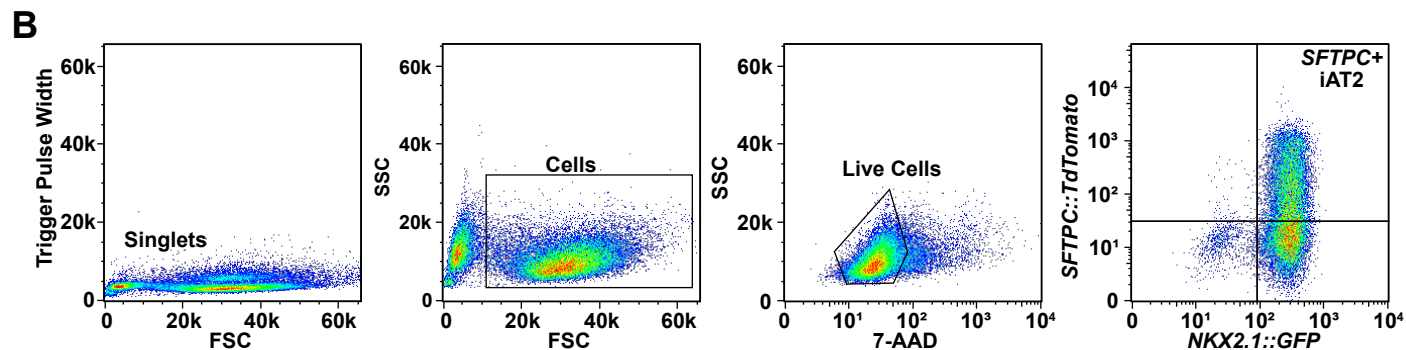

Supplement: supp [file elife_poa_e64430_Figure_1_figure_supplement_3.pdf › elife_poa_e64430_Figure_1_figure_supplement_3.pdf]

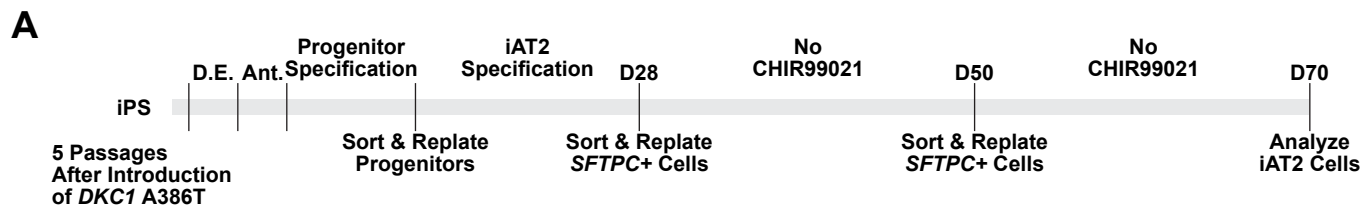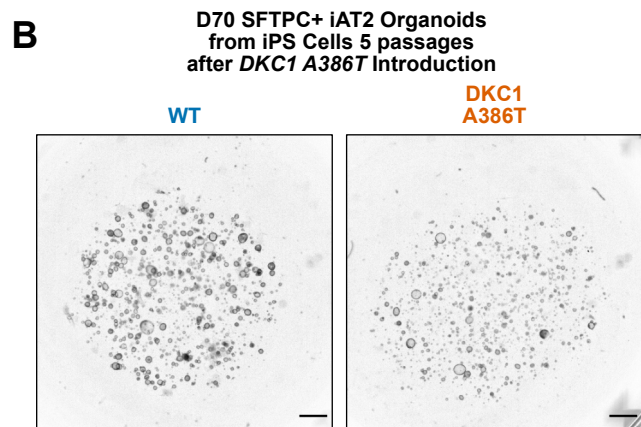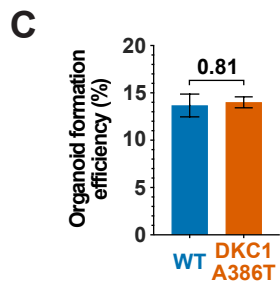

Supplement: supp [file elife_poa_e64430_Figure_1_figure_supplement_4.pdf › elife_poa_e64430_Figure_1_figure_supplement_4.pdf]

**A**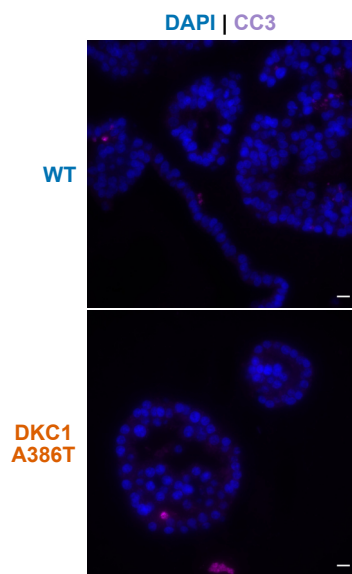**B**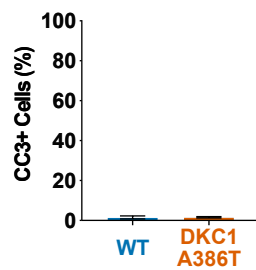**C**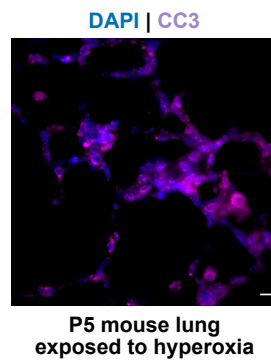

Supplement: supp [file elife_poa_e64430_Figure_2_figure_supplement_1.pdf › elife_poa_e64430_Figure_2_figure_supplement_1.pdf]

**A**

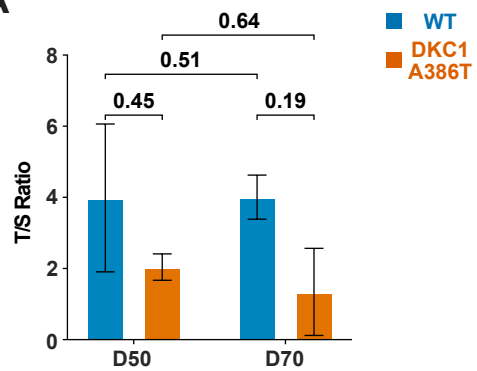

Supplement: supp [file elife_poa_e64430_Figure_2_figure_supplement_2.pdf › elife_poa_e64430_Figure_2_figure_supplement_2.pdf]

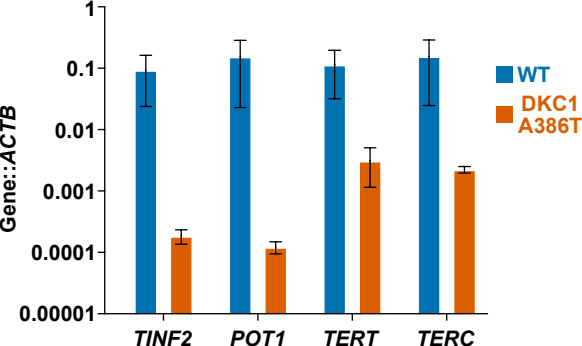

Supplement: supp [file elife_poa_e64430_Figure_3_figure_supplement_1.pdf › elife_poa_e64430_Figure_3_figure_supplement_1.pdf]

**A**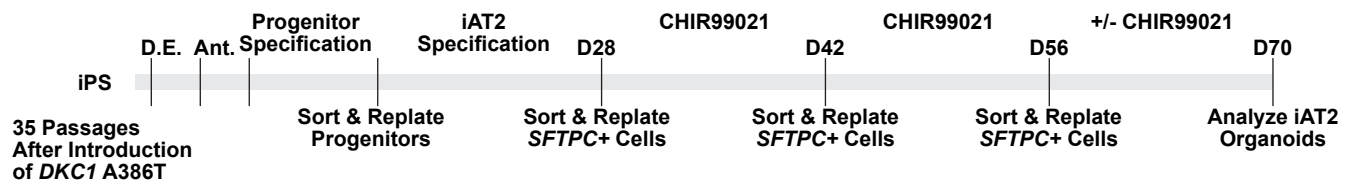**B**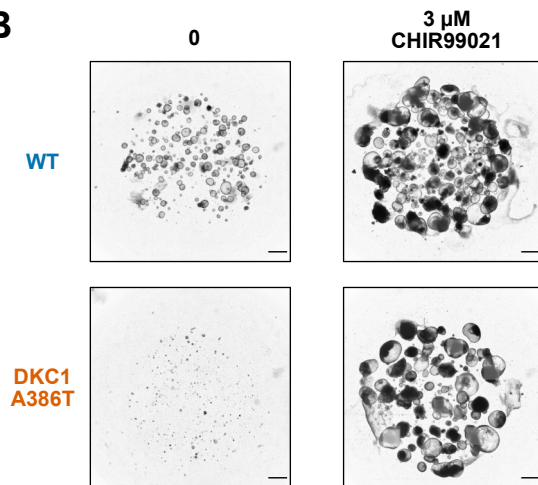

Supplement: supp [file elife_poa_e64430_Figure_4_figure_supplement_1.pdf › elife_poa_e64430_Figure_4_figure_supplement_1.pdf]

**A**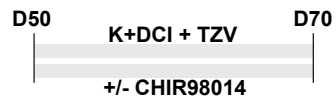**B**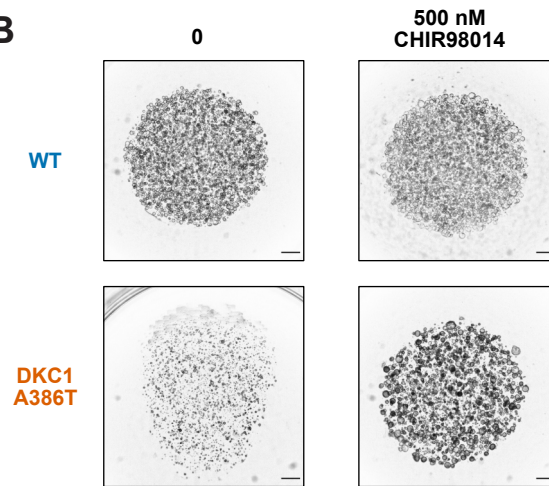

Supplement: supp [file elife_poa_e64430_Figure_4_figure_supplement_2.pdf › elife_poa_e64430_Figure_4_figure_supplement_2.pdf]

**A**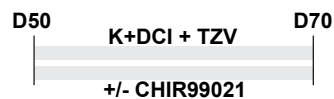**B**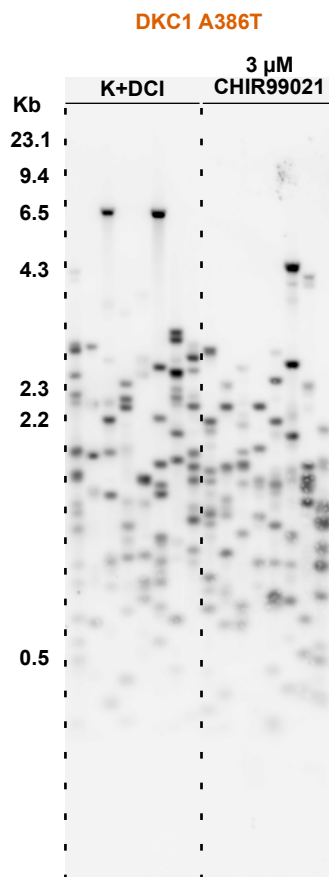**C**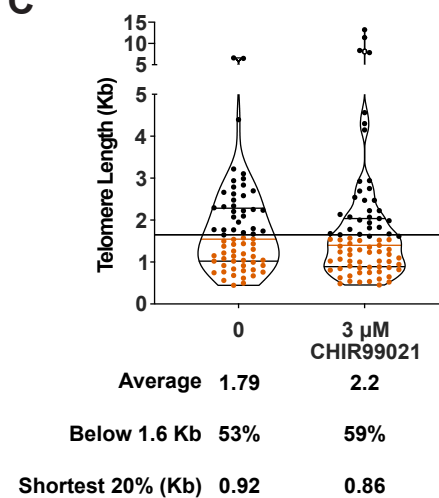

Supplement: supp [file elife_poa_e64430_Figure_4_figure_supplement_3.pdf › elife_poa_e64430_Figure_4_figure_supplement_3.pdf]
